# Supplementary material
Source: PubMed Central journal article supplement (PMC7596760)

# SUPPORTING INFORMATION

## Hydrogenative Metathesis of Enynes via Pianostool Ruthenium Carbene Complexes Formed by Alkyne *gem*-Hydrogenation

Sebastian Peil, Giovanni Bistoni, Richard Goddard, and Alois Fürstner\*

*Max-Planck-Institut für Kohlenforschung, 45470 Mülheim/Ruhr (Germany)*

E-Mail: [fuerstner@kofo.mpg.de](mailto:fuerstner@kofo.mpg.de)

## COPIES OF SPECTRA

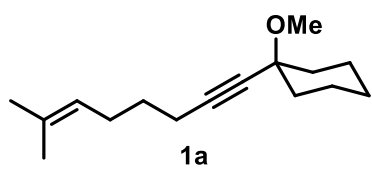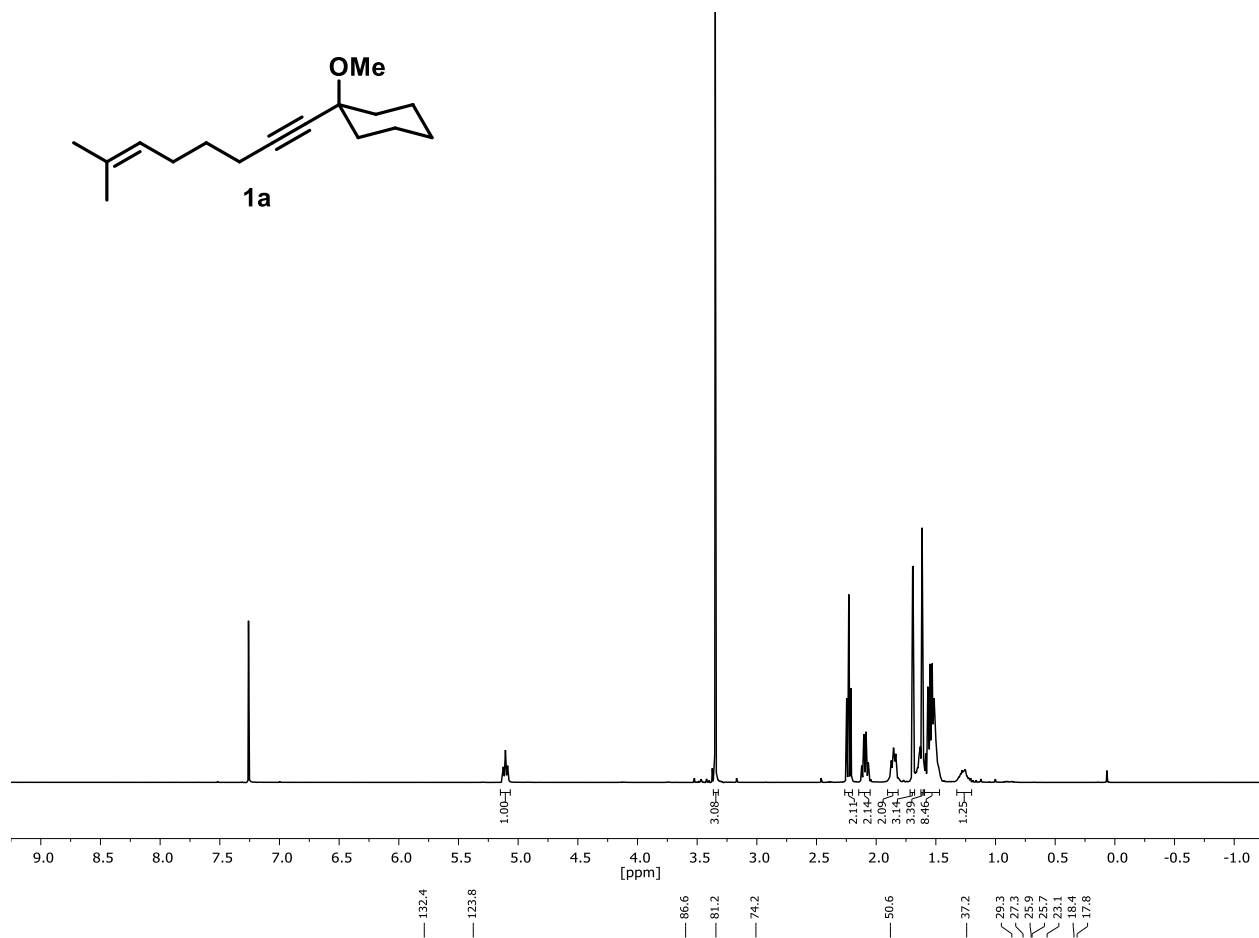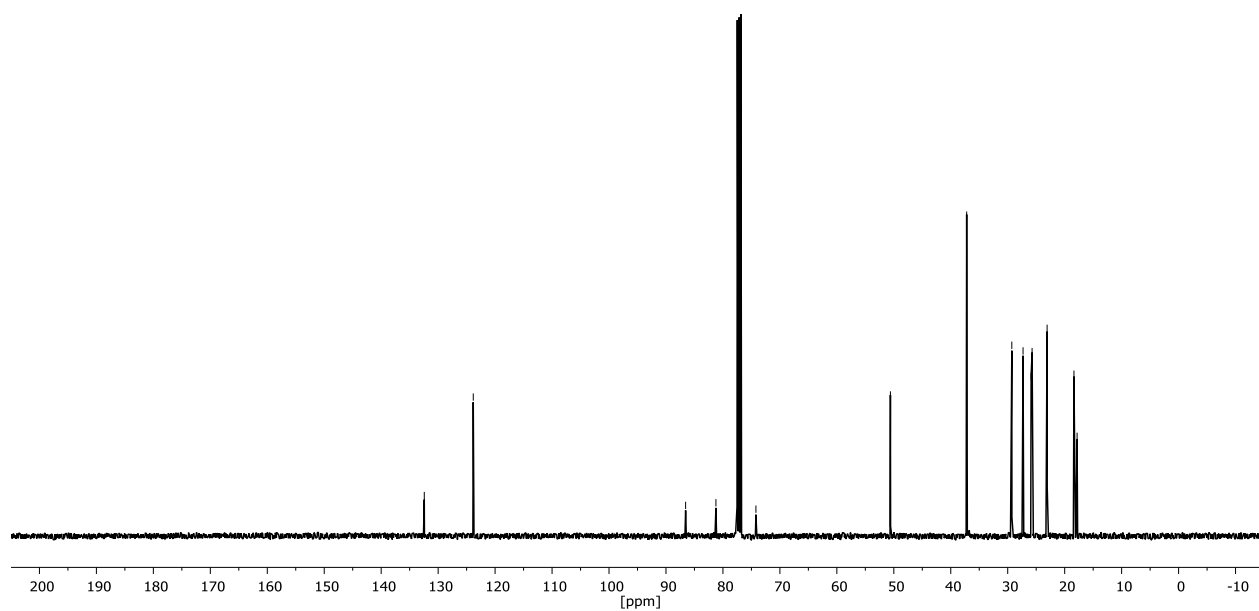

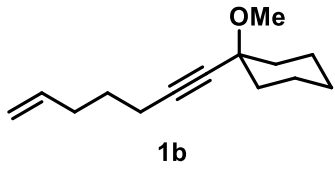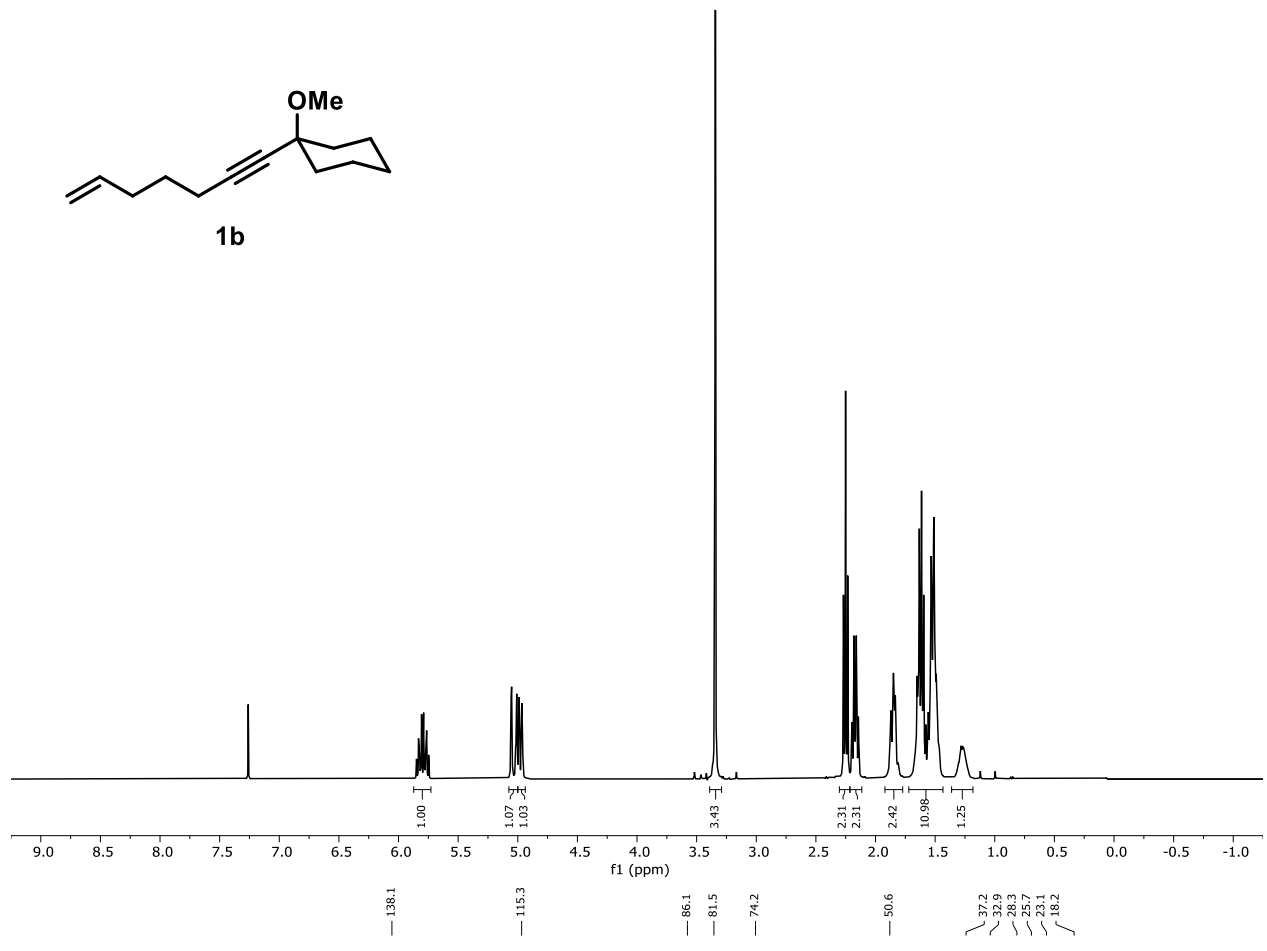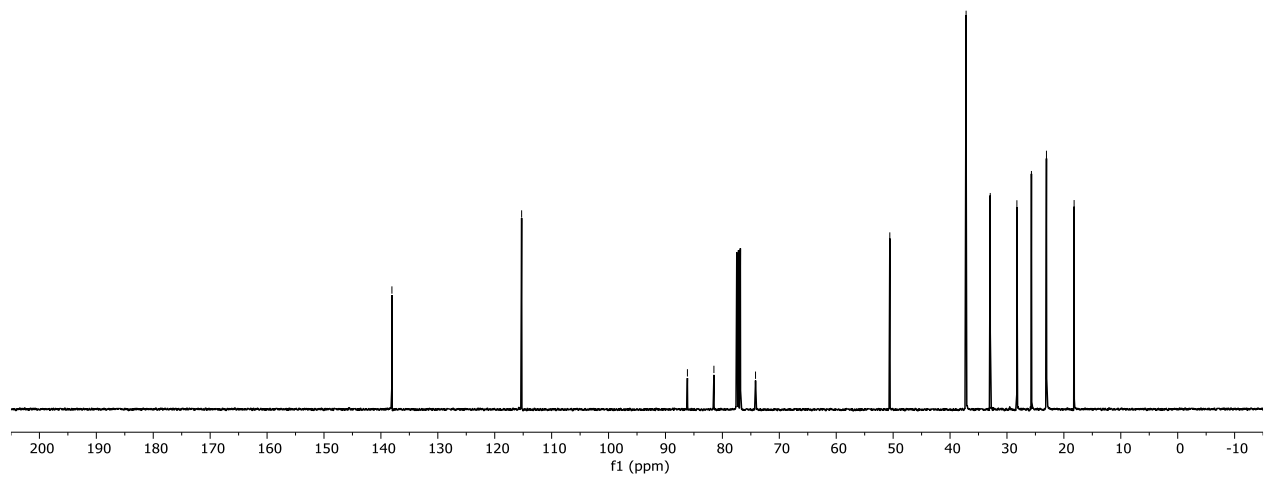

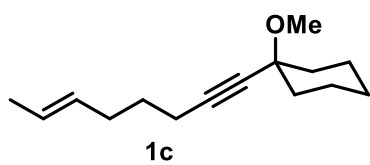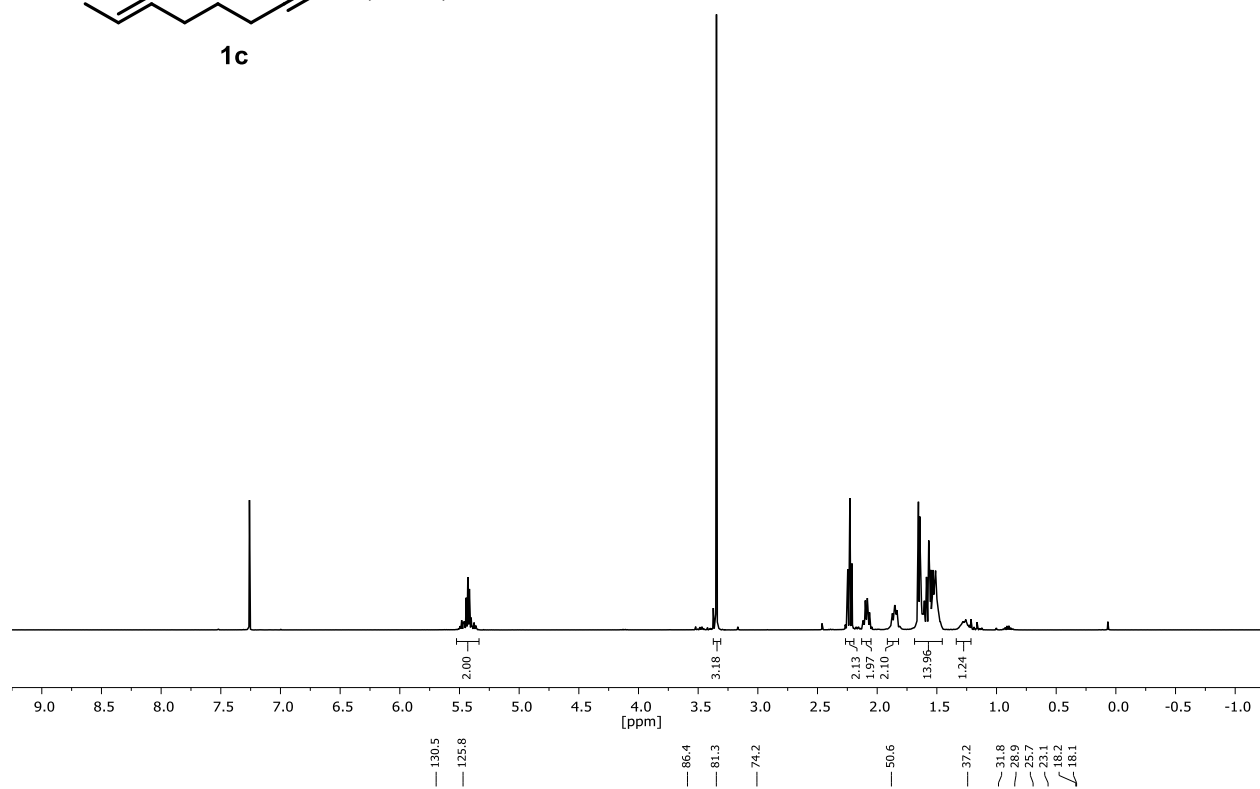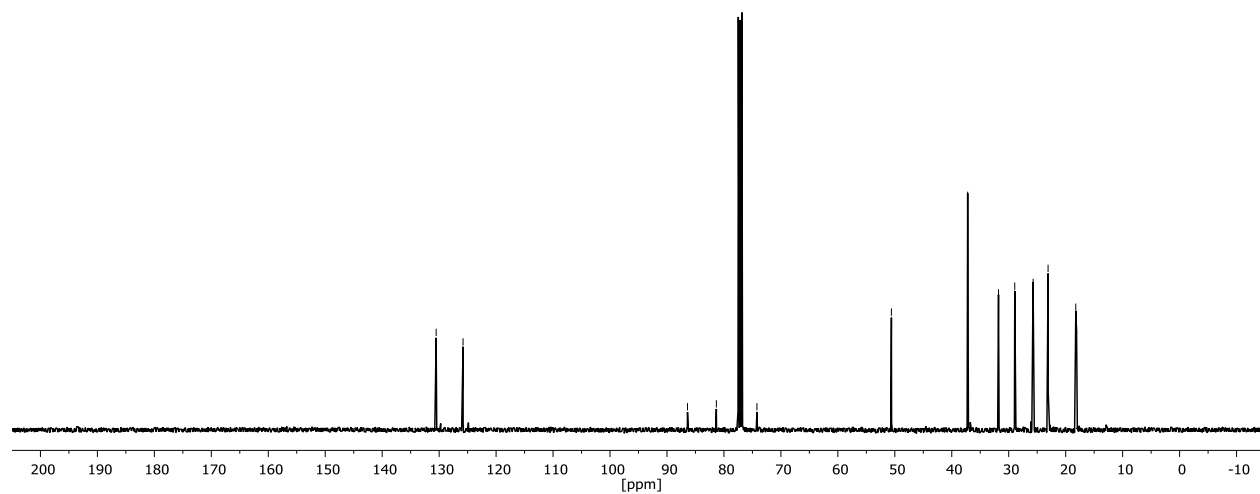



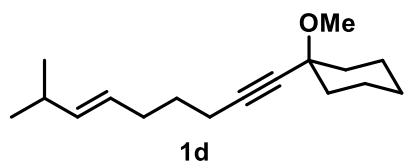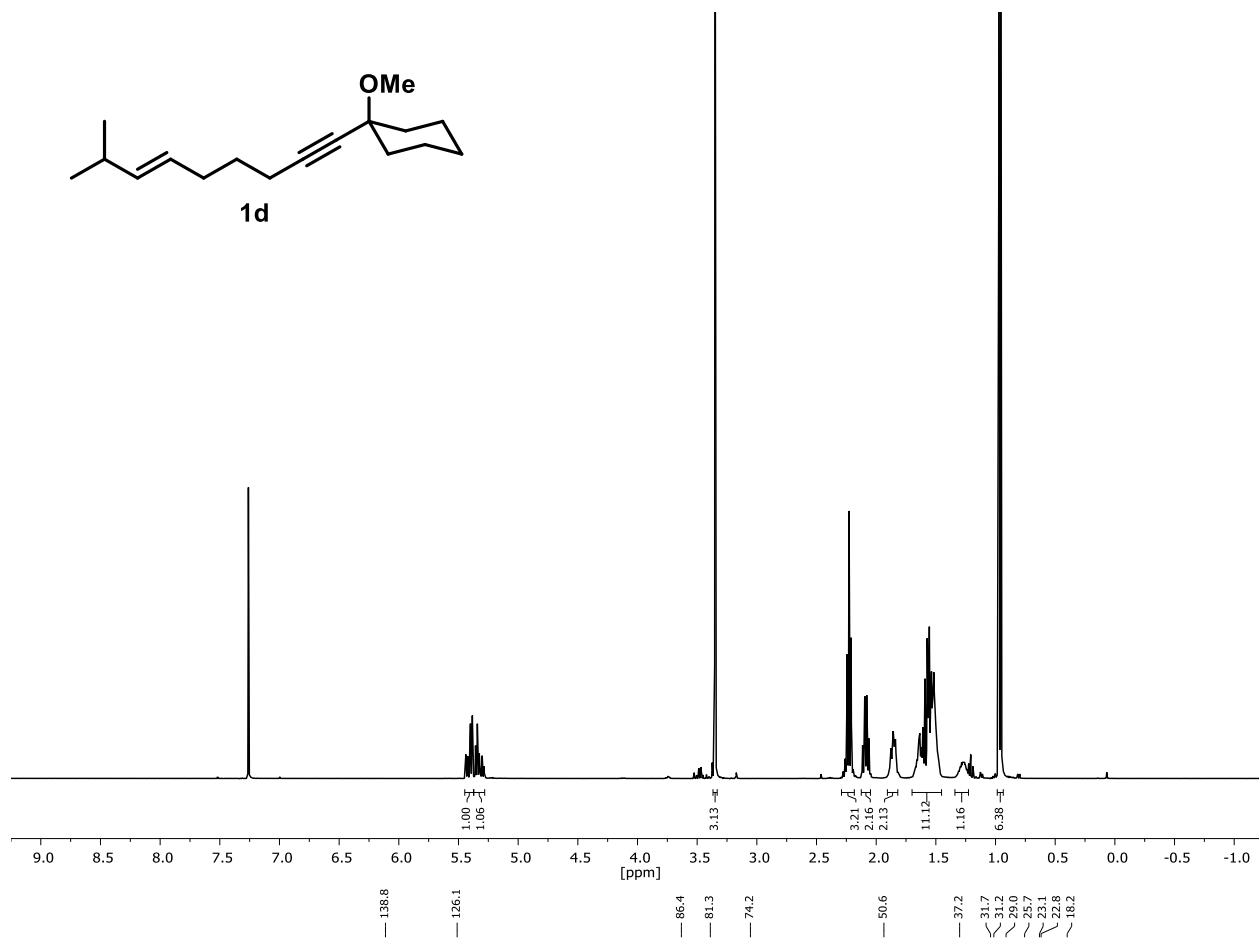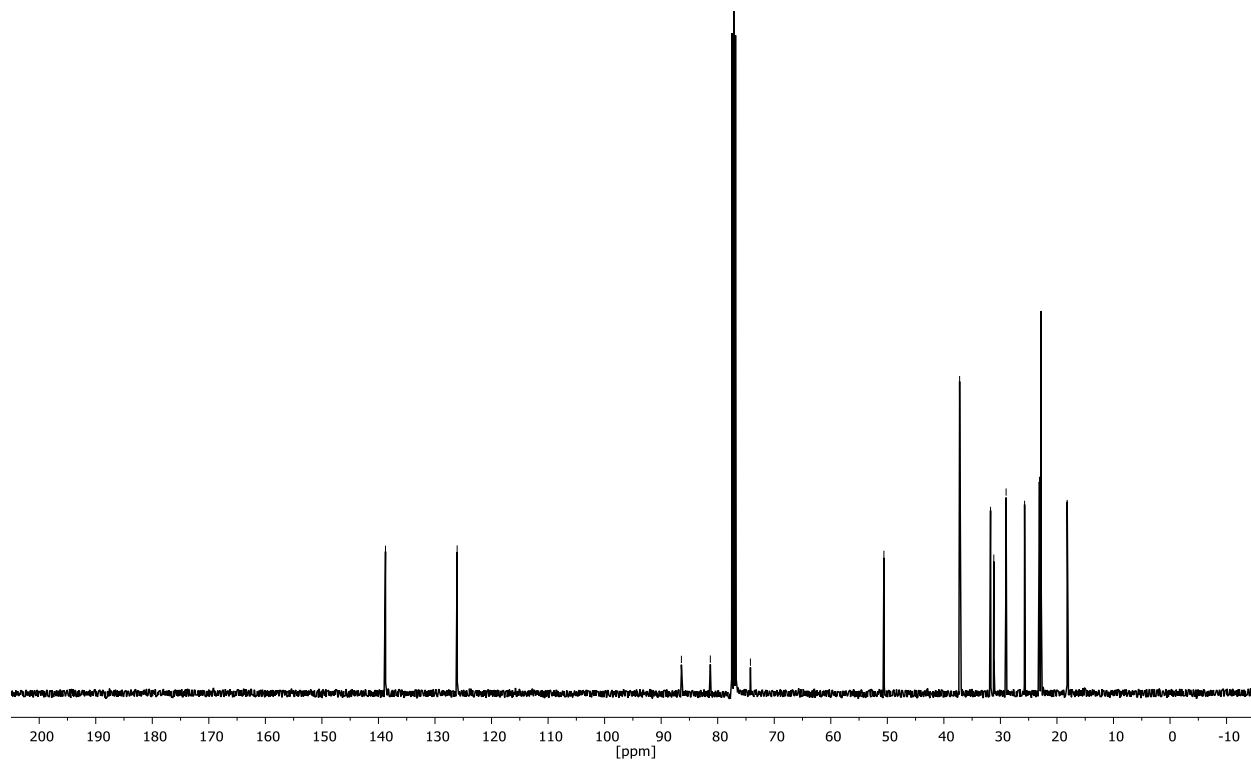

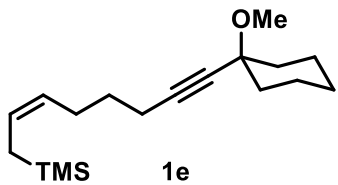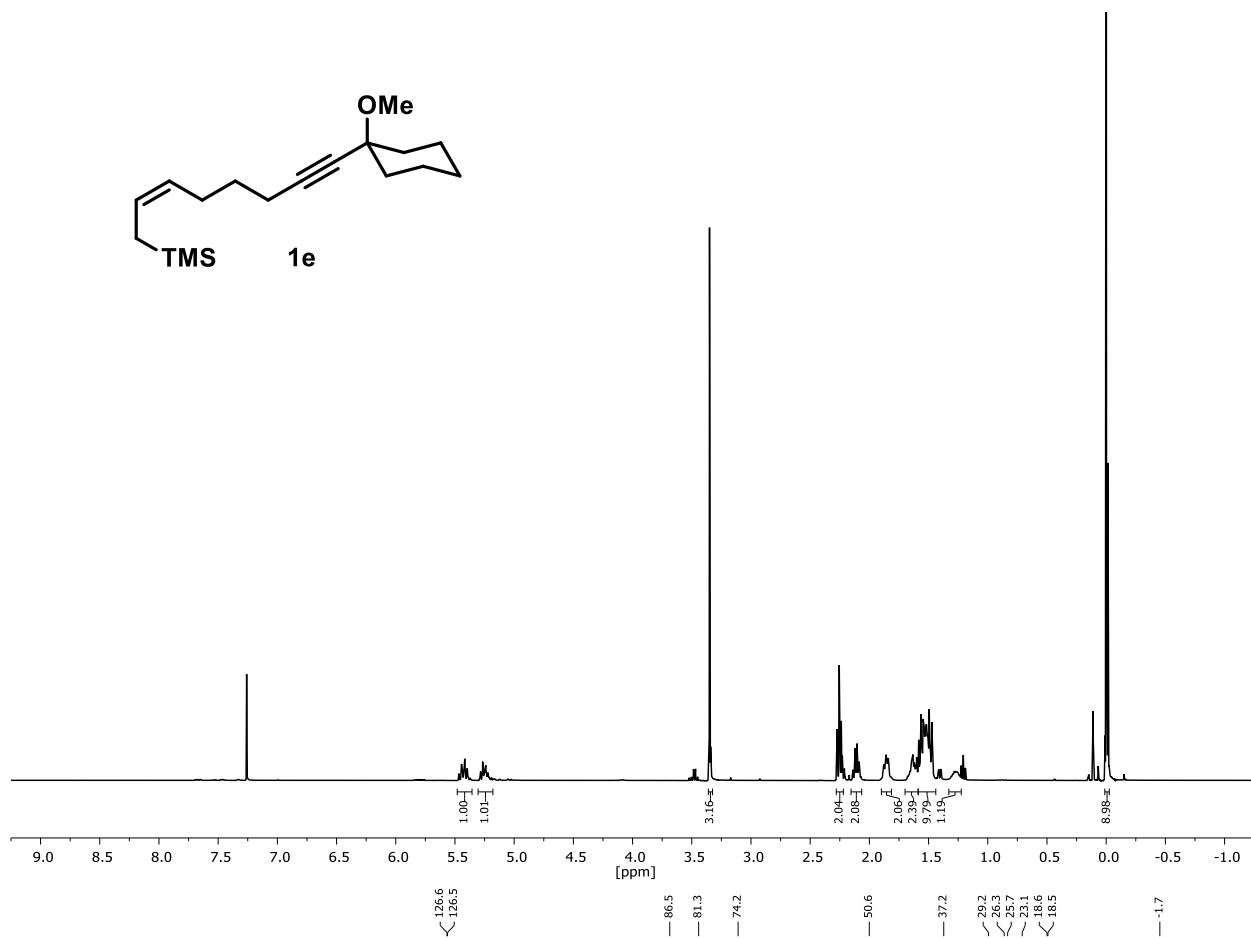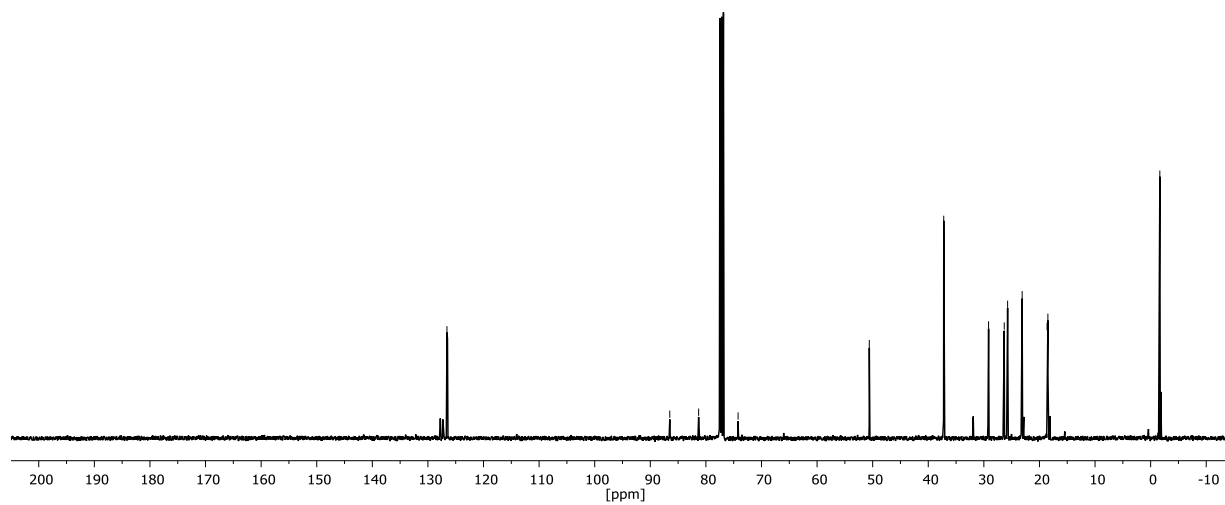

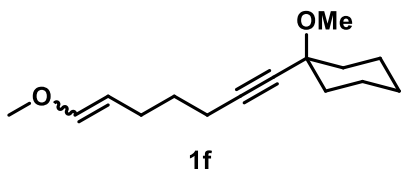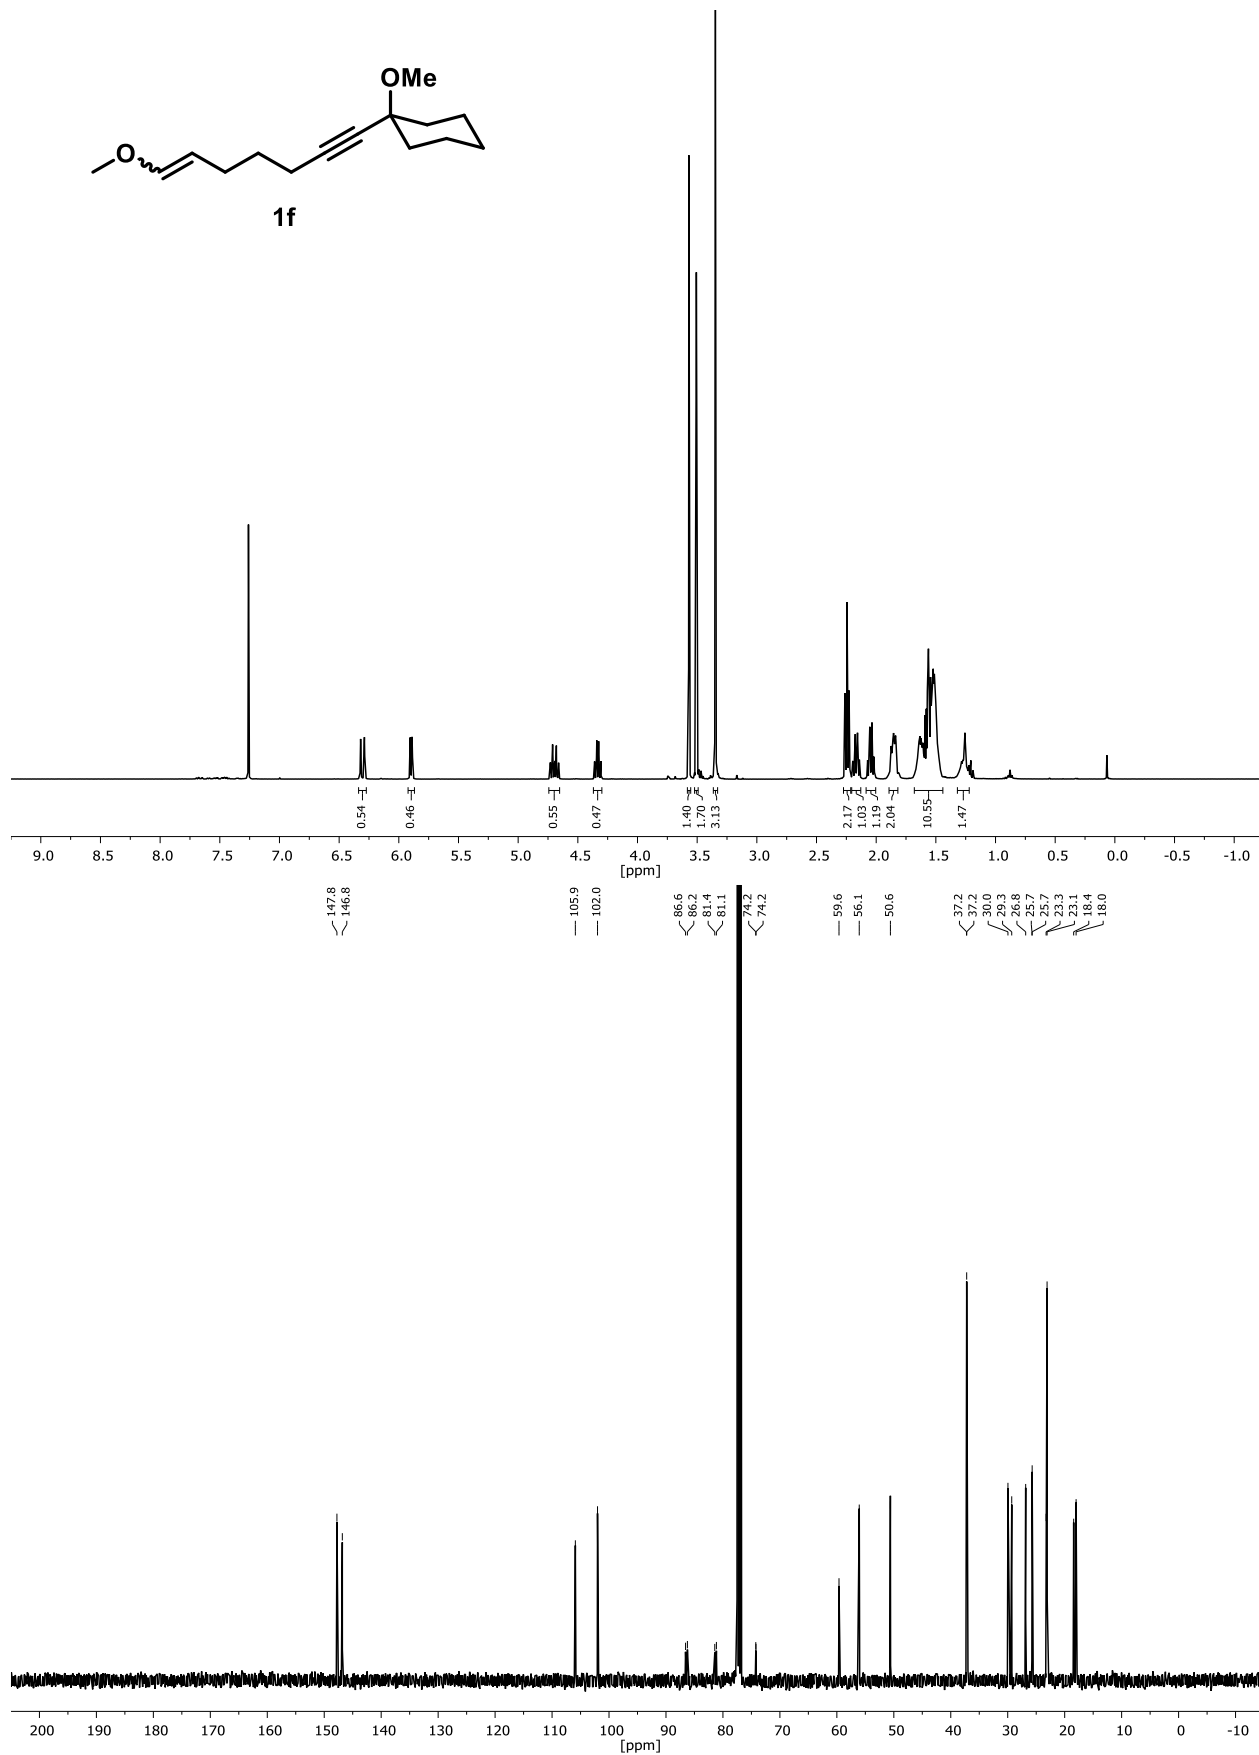

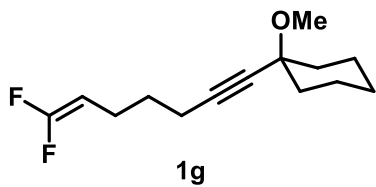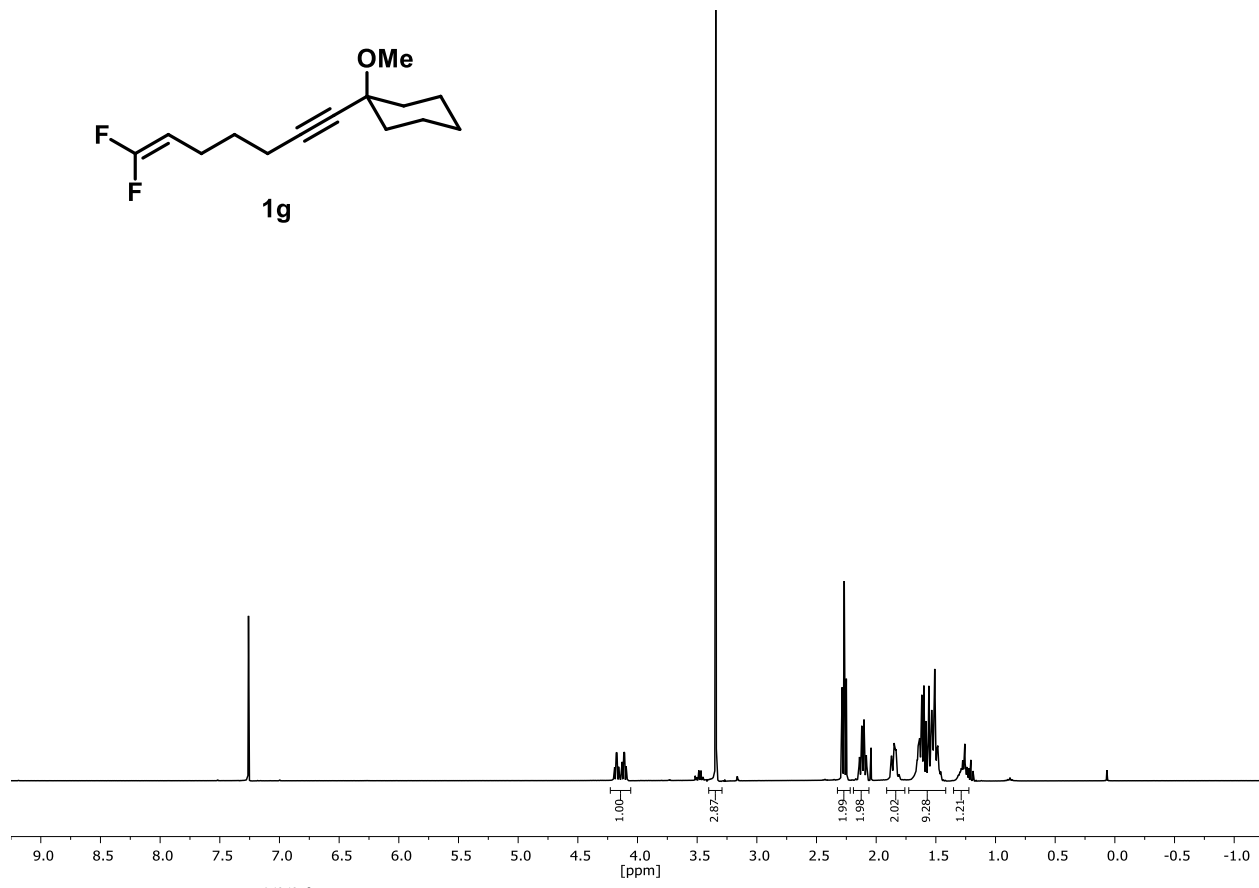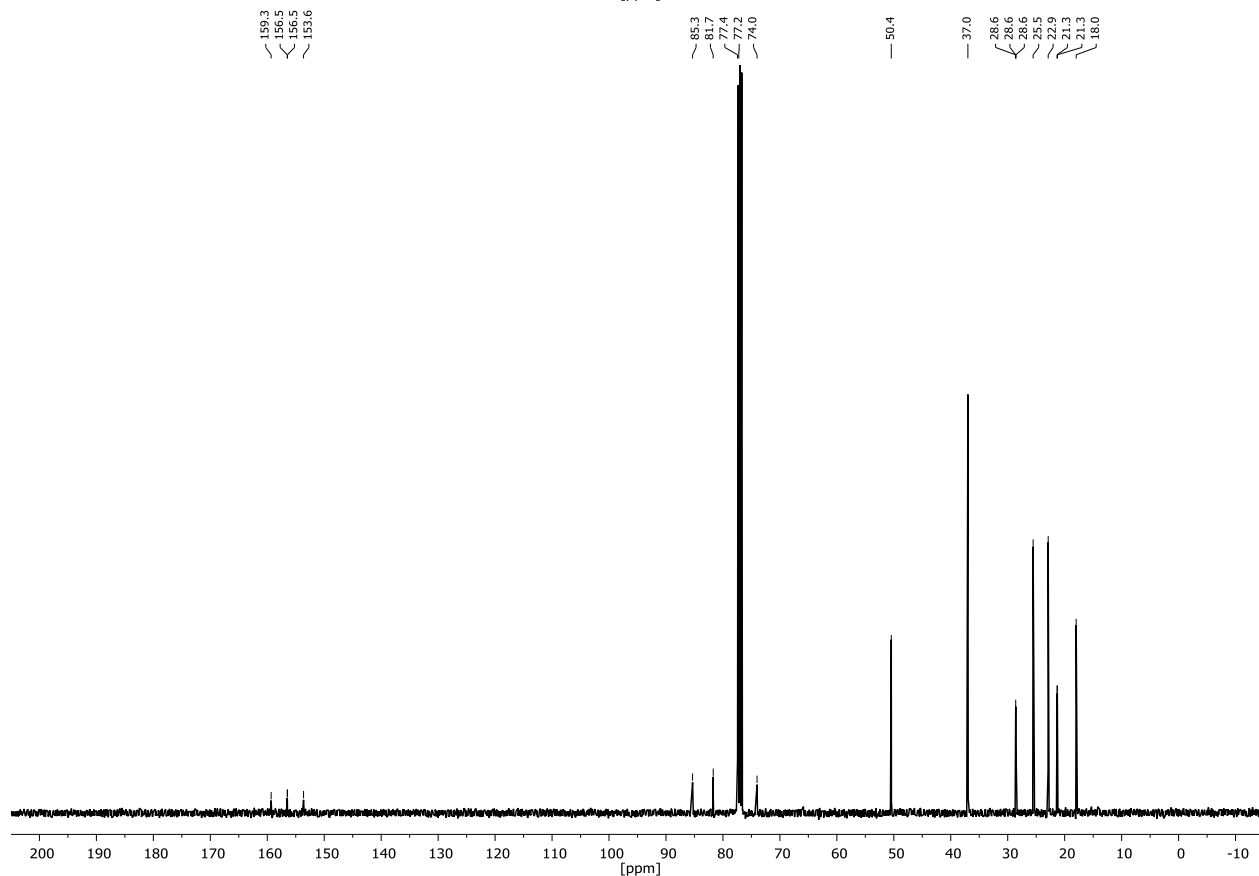

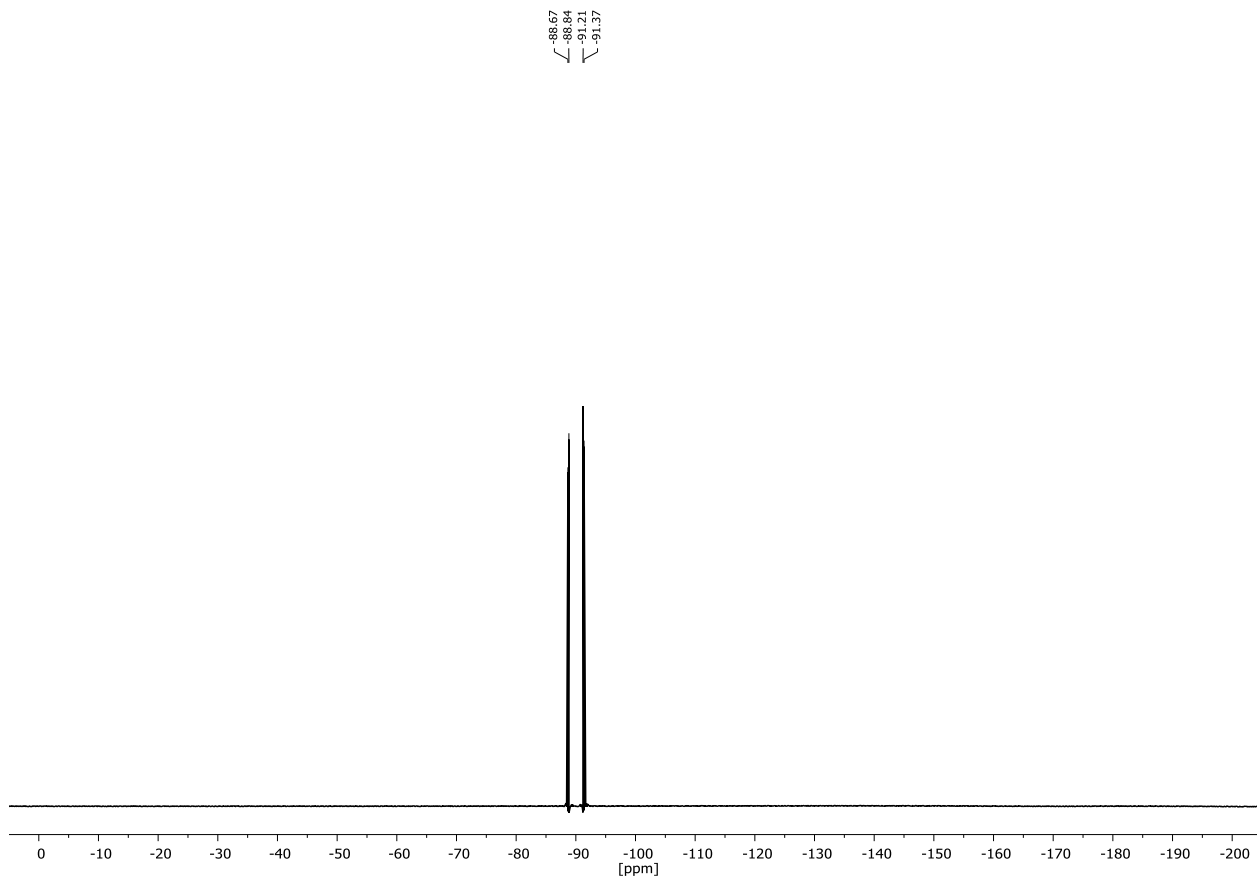

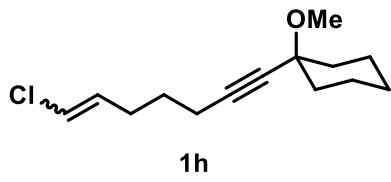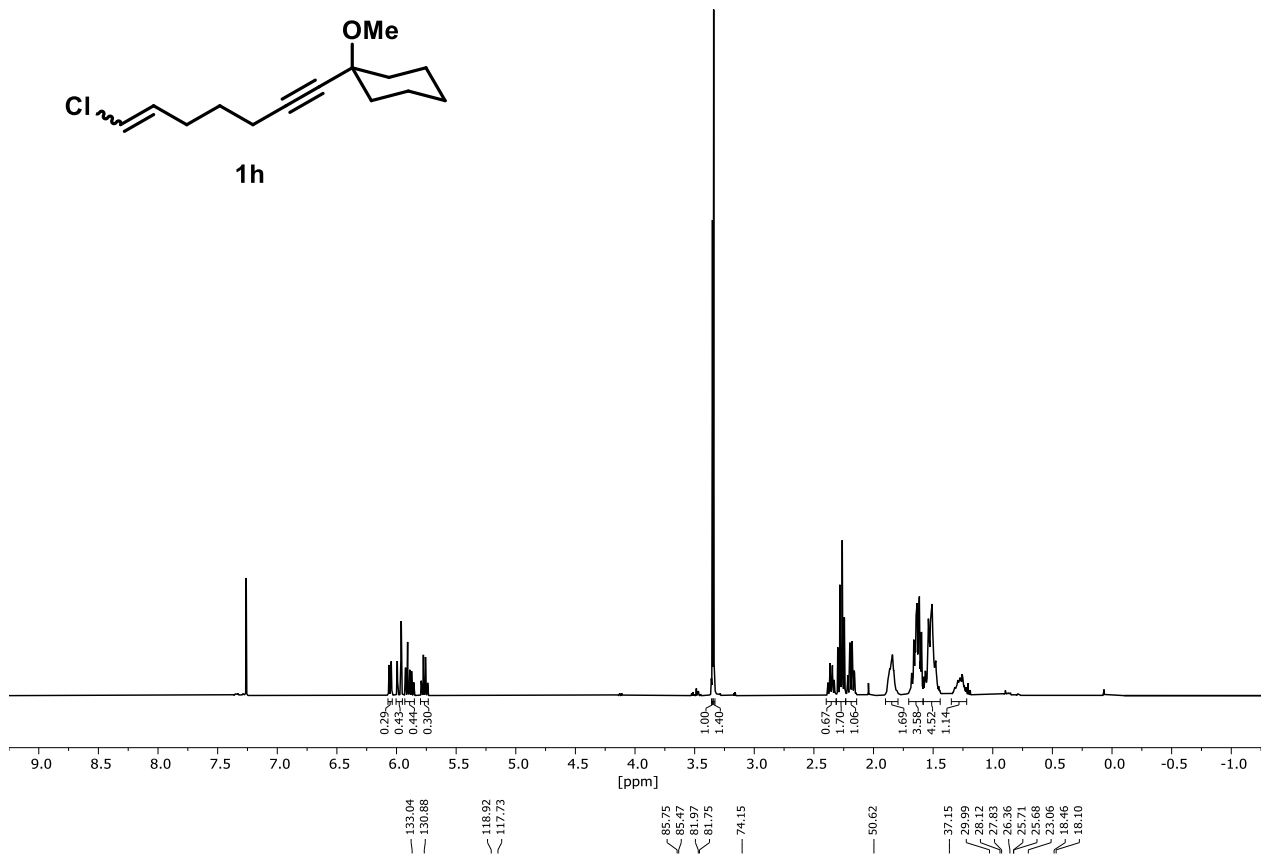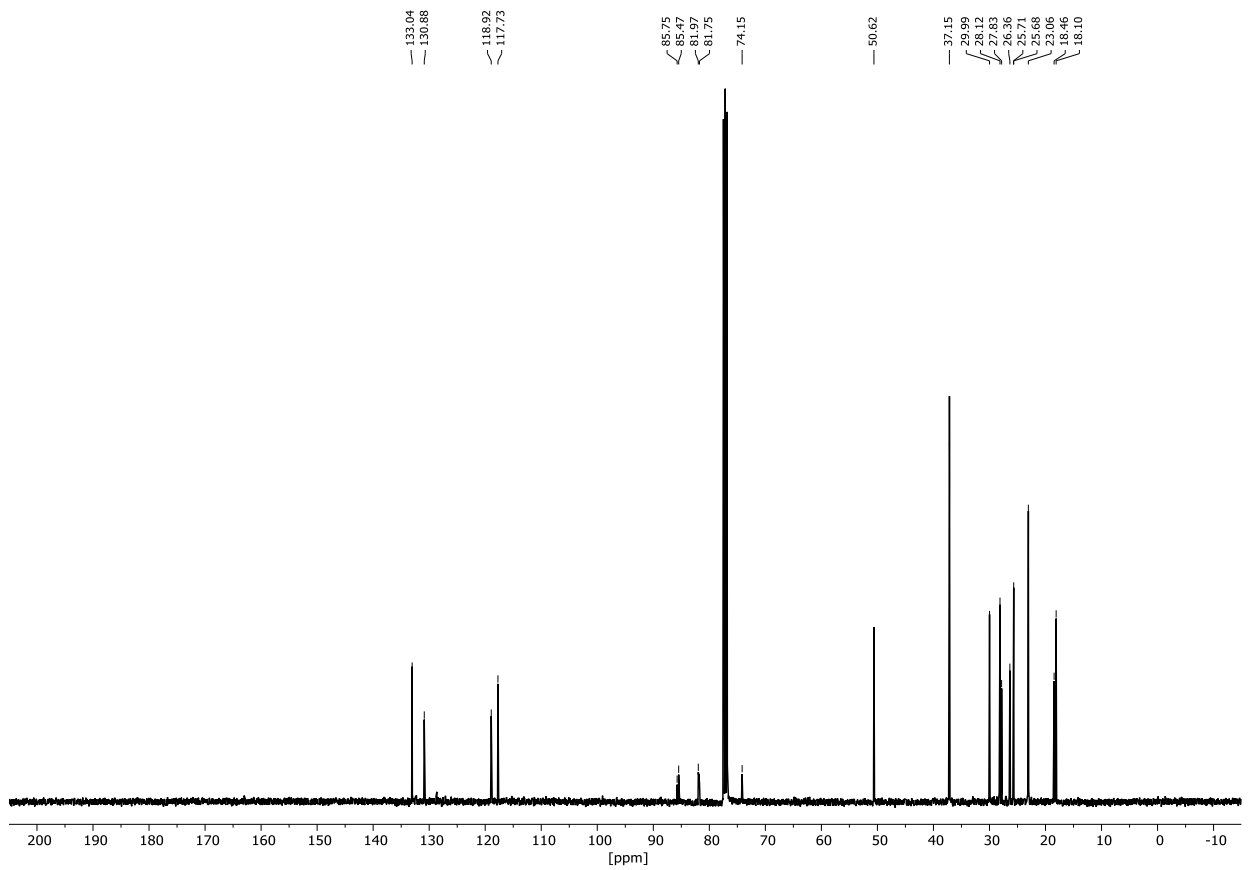

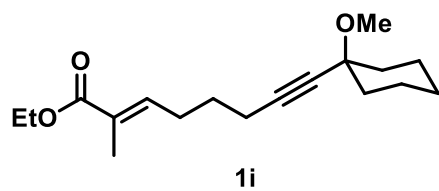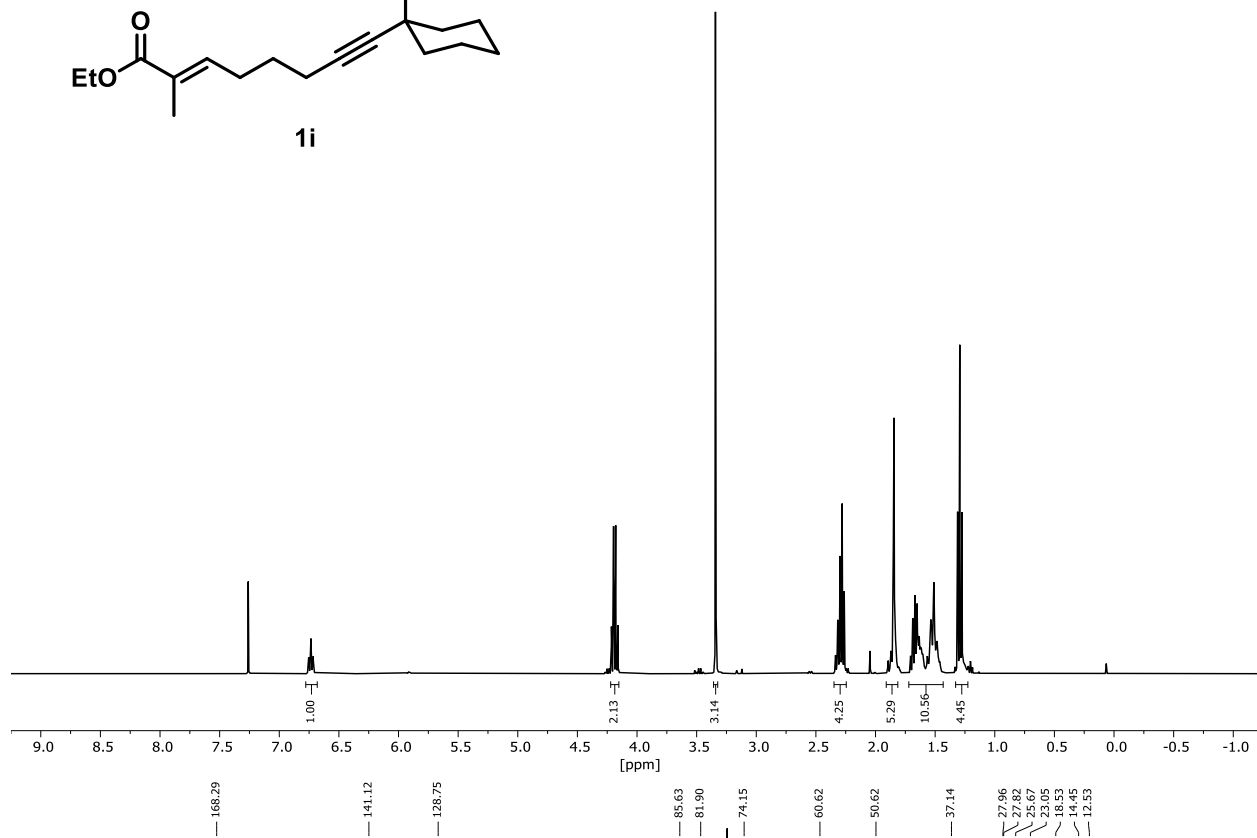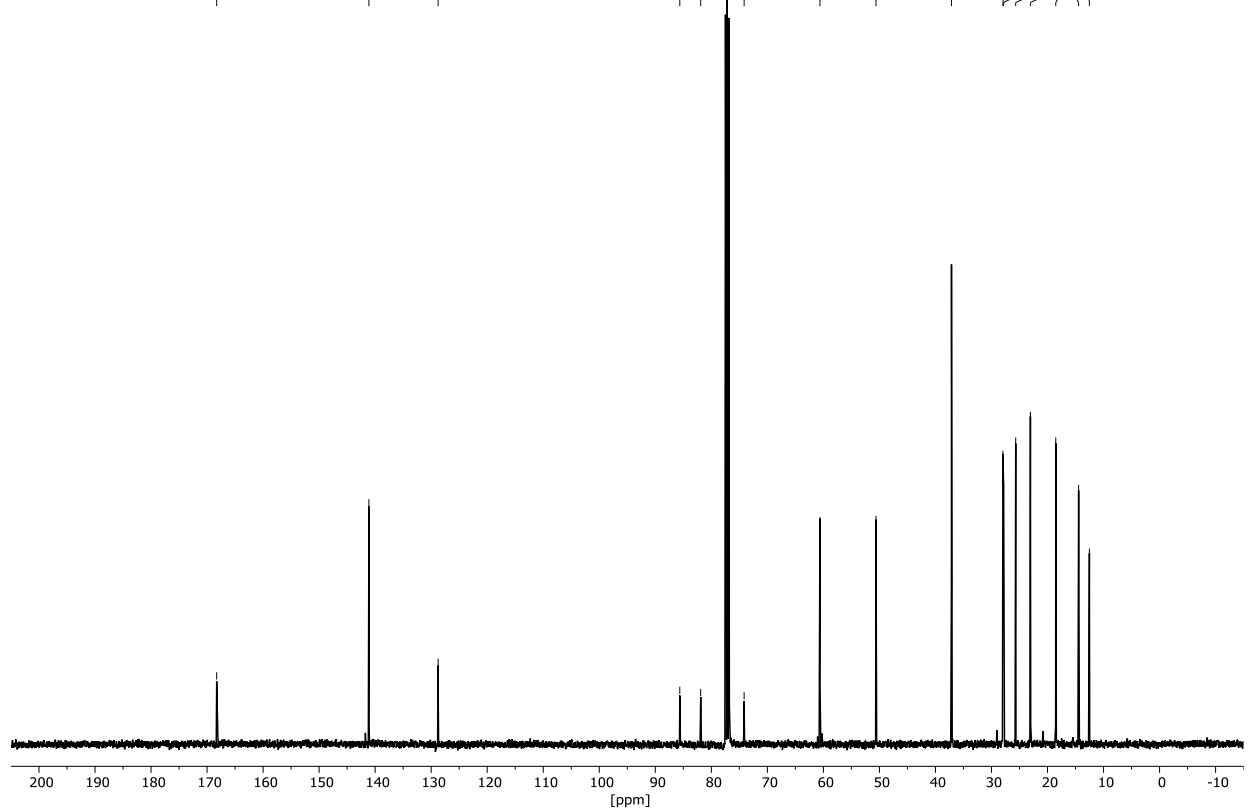

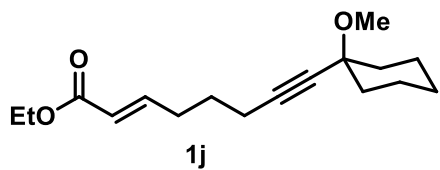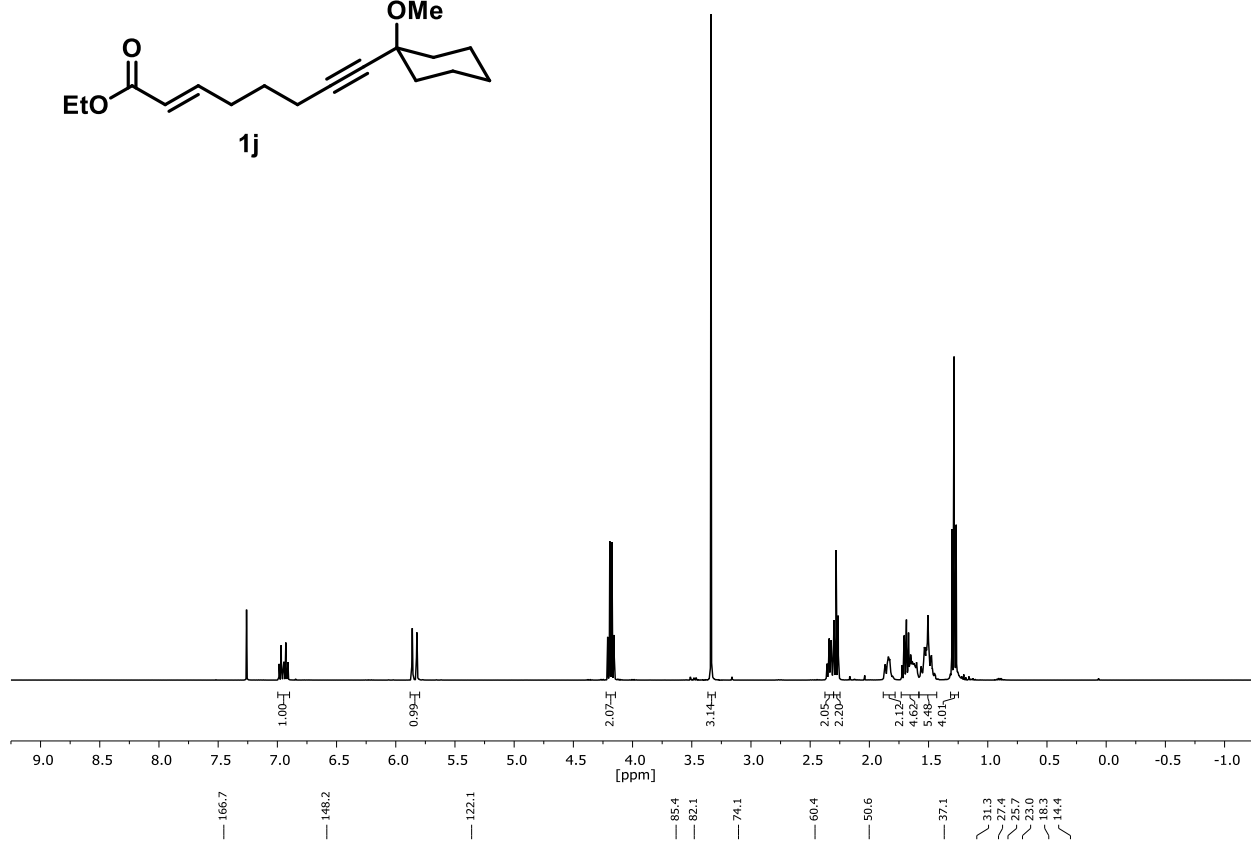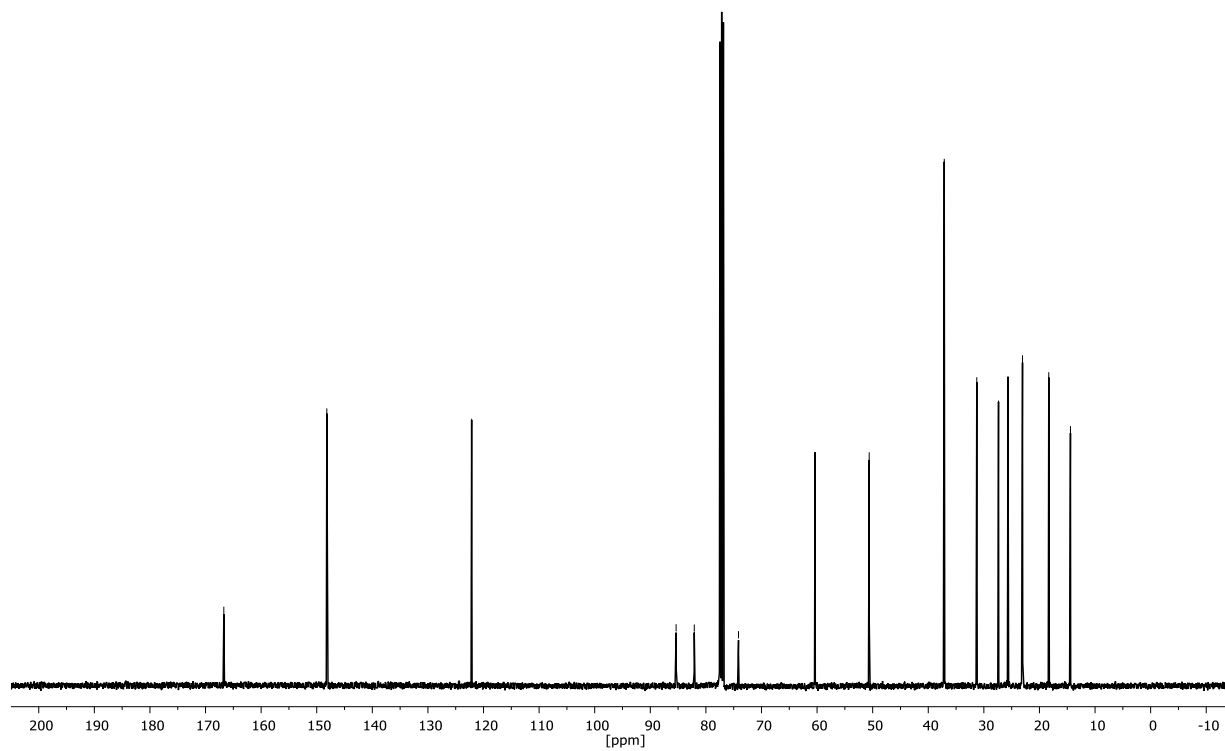



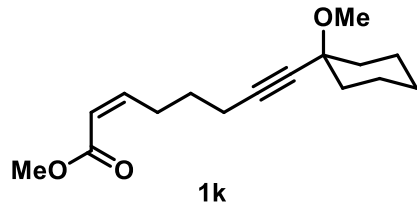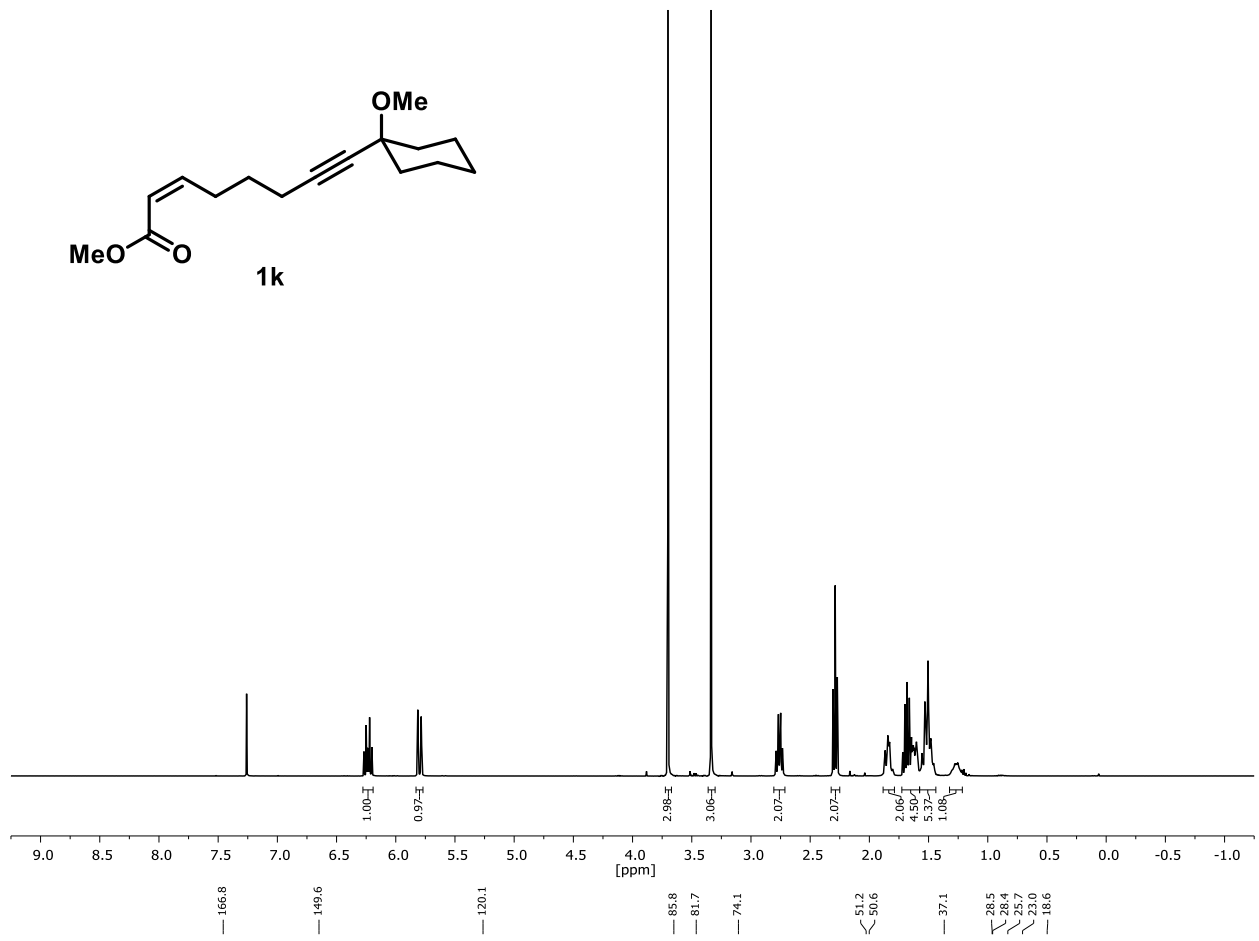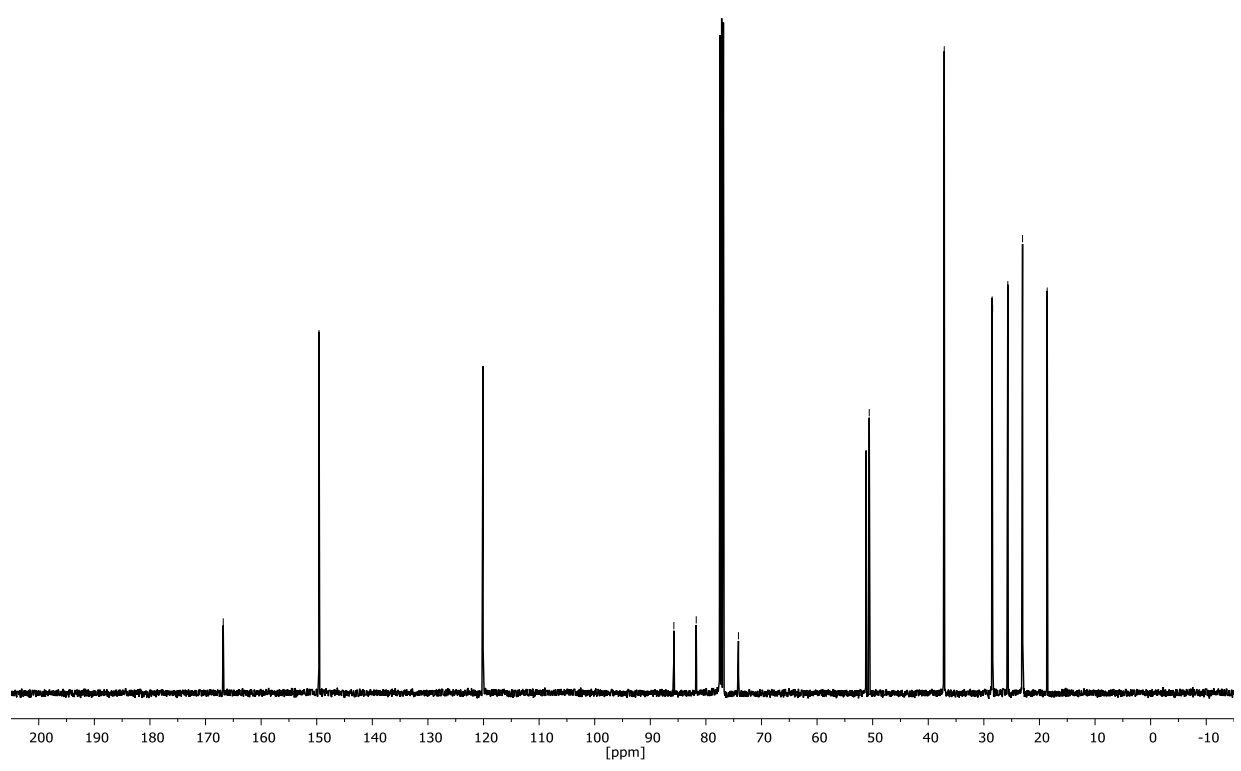

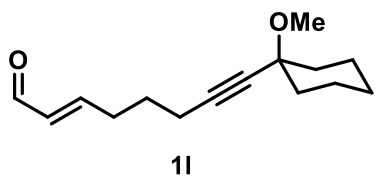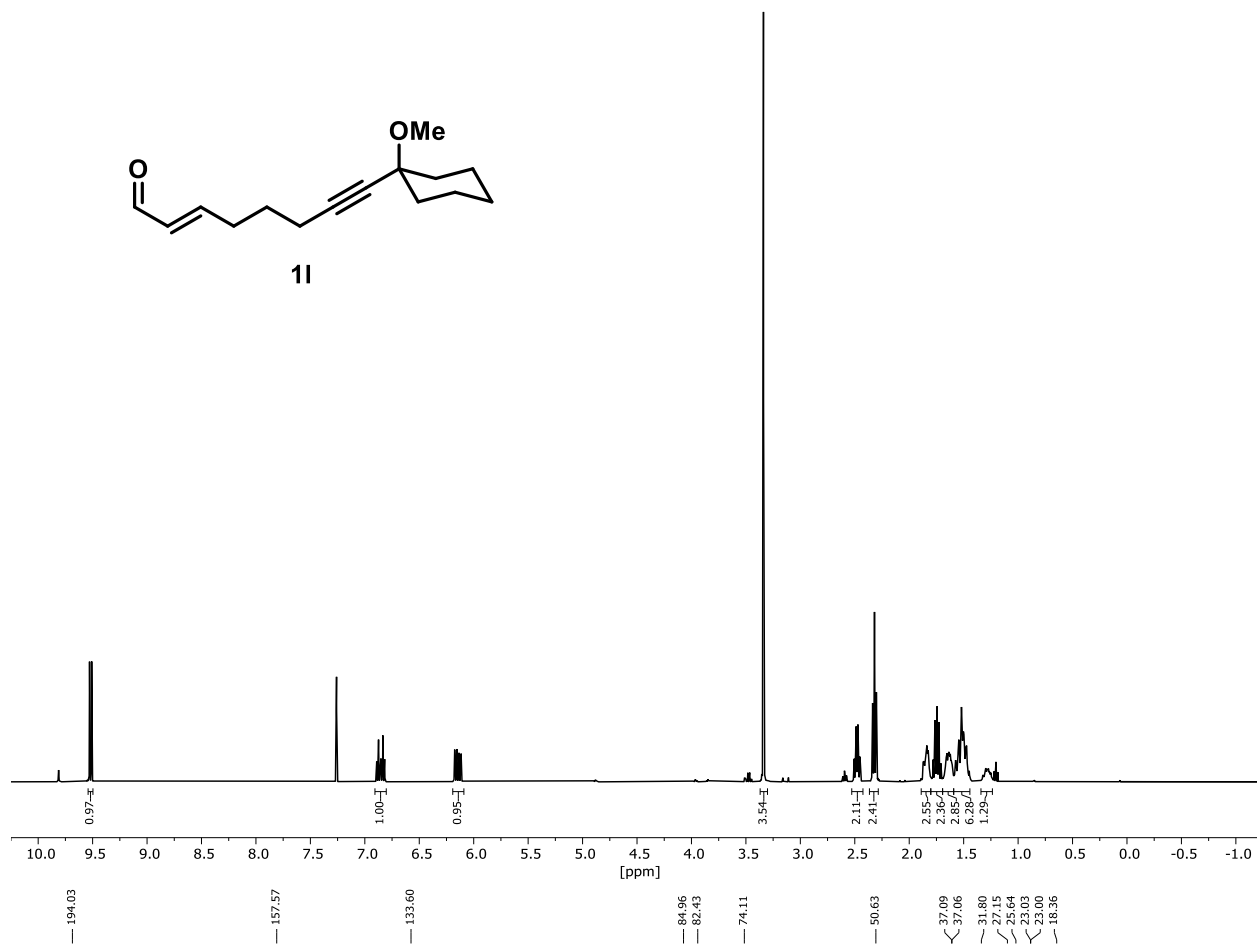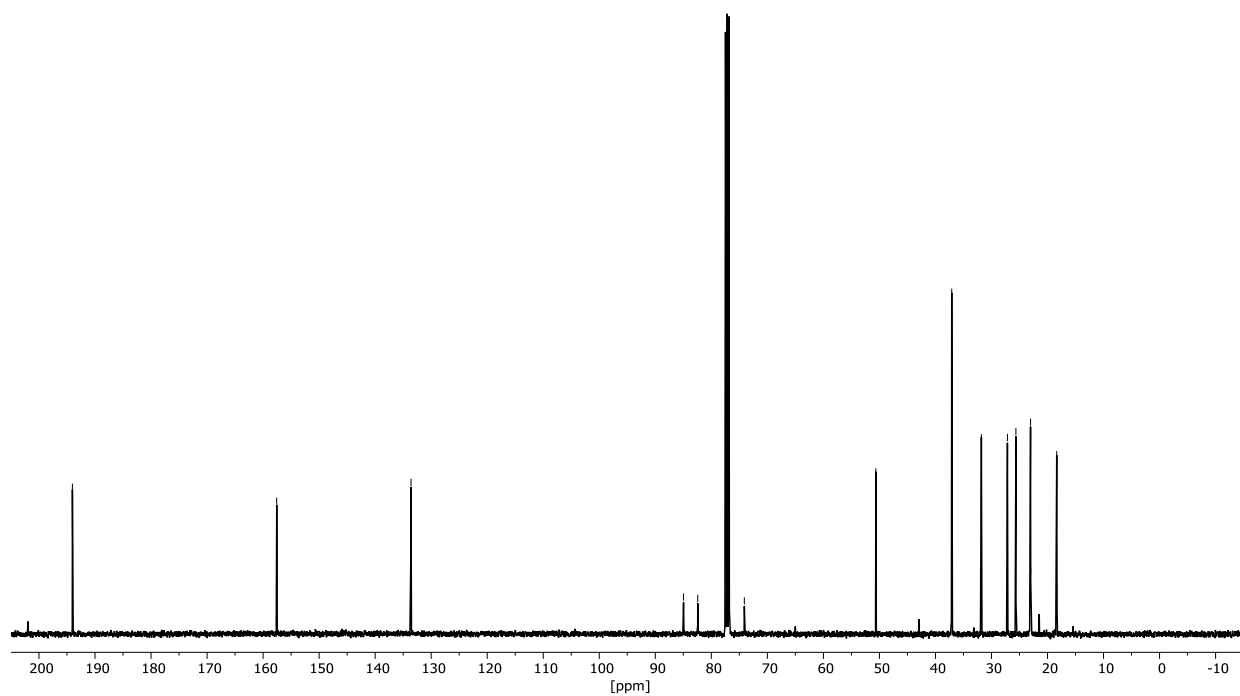

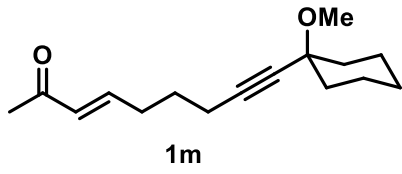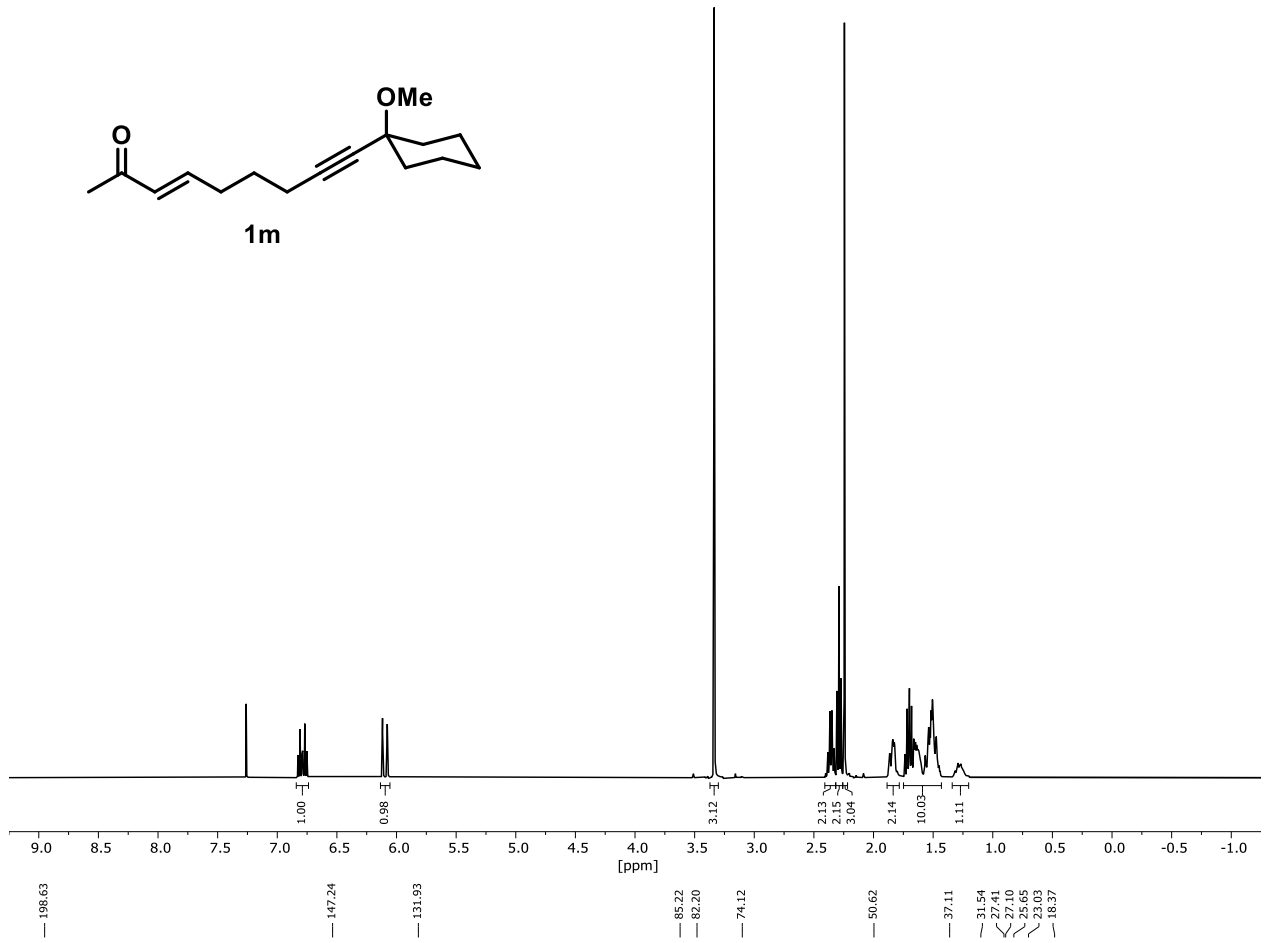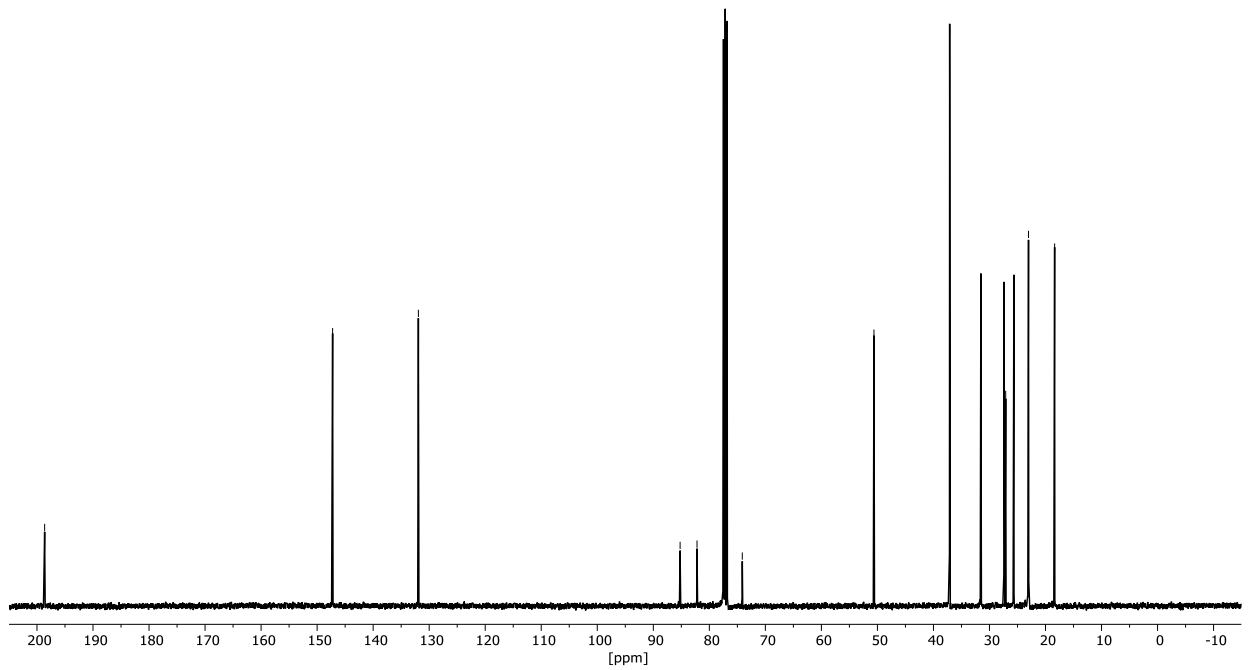

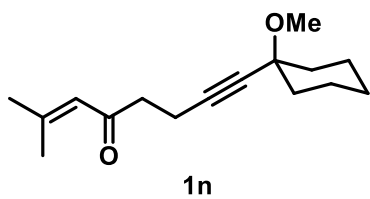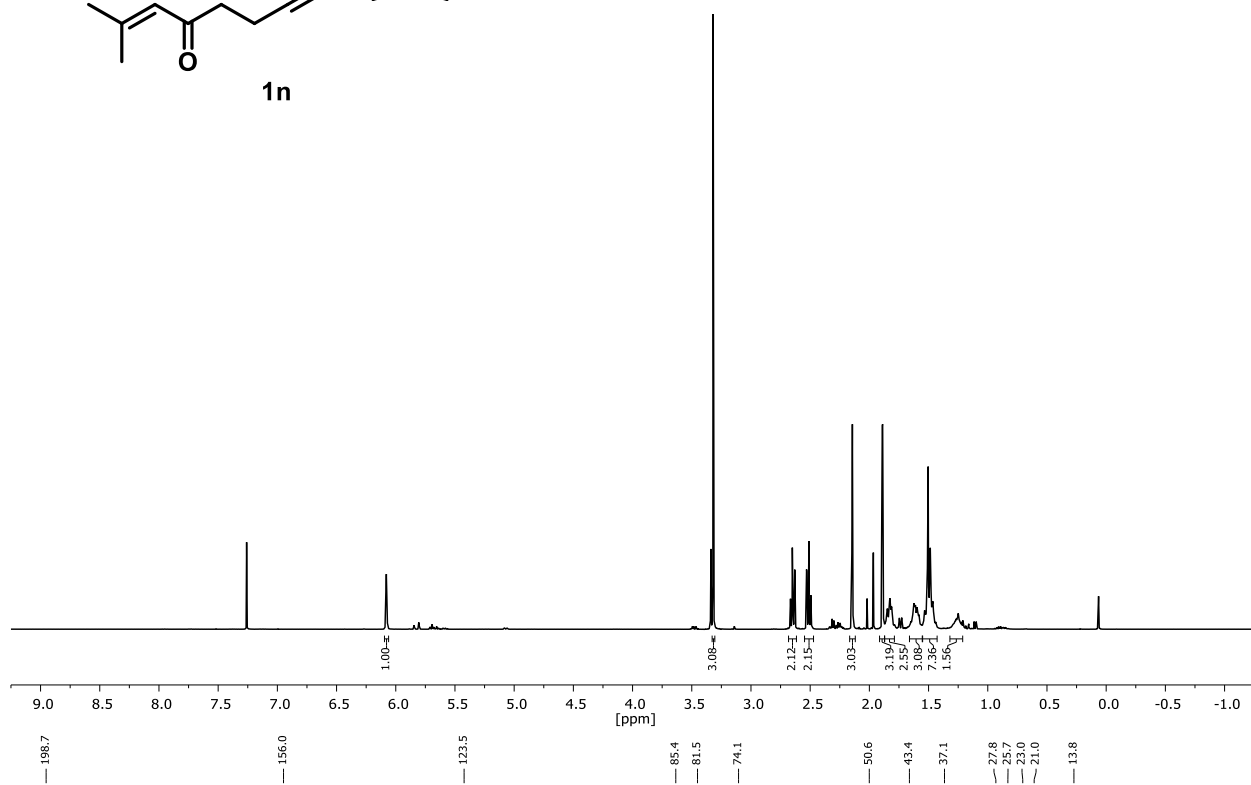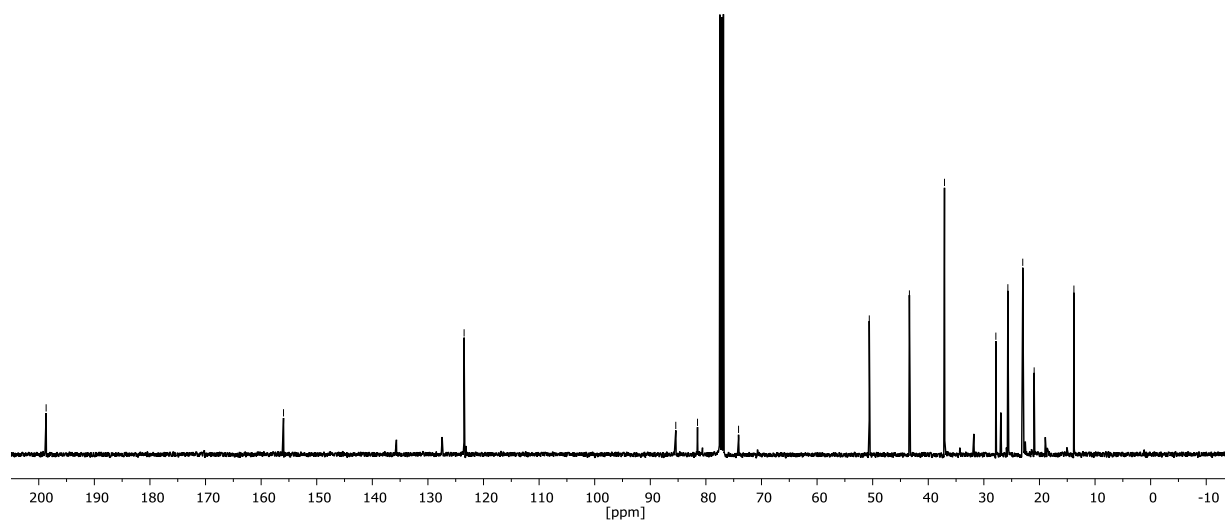

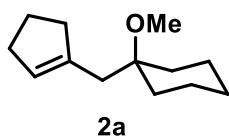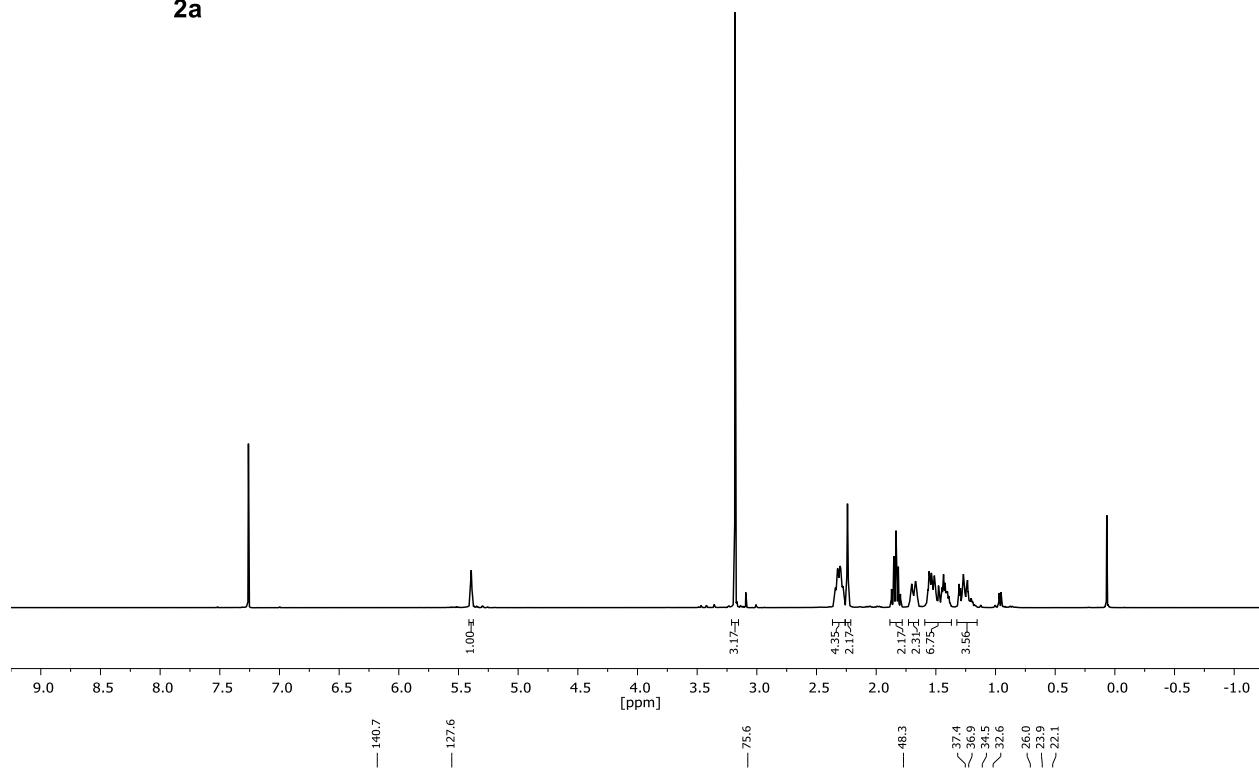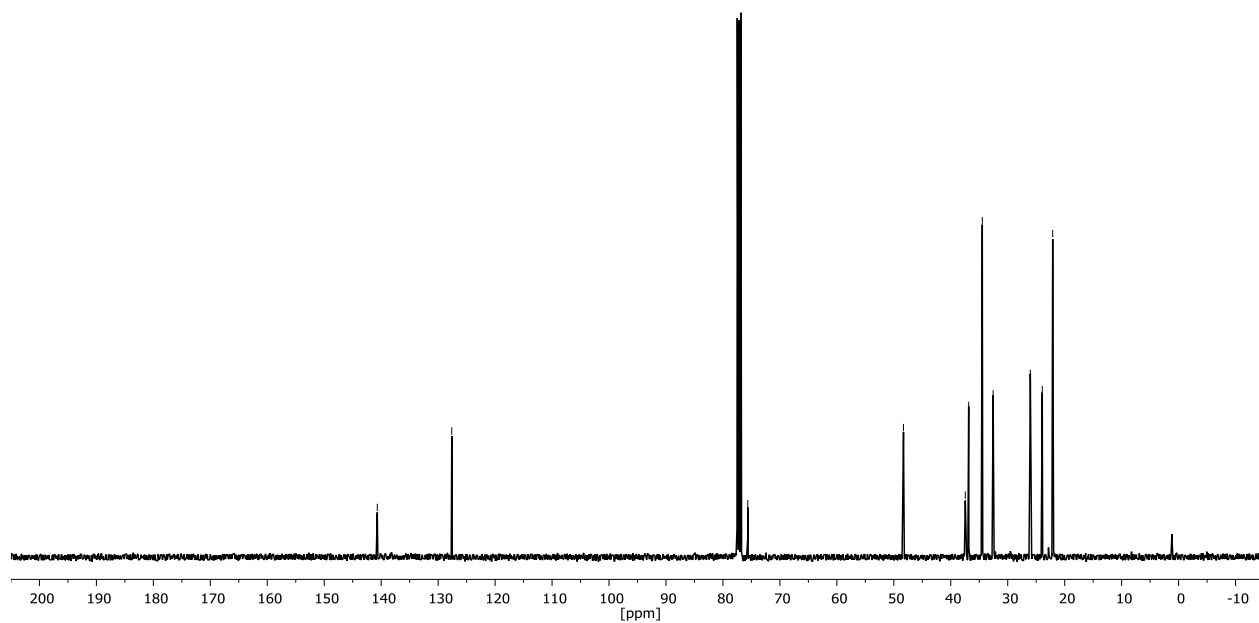

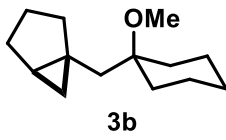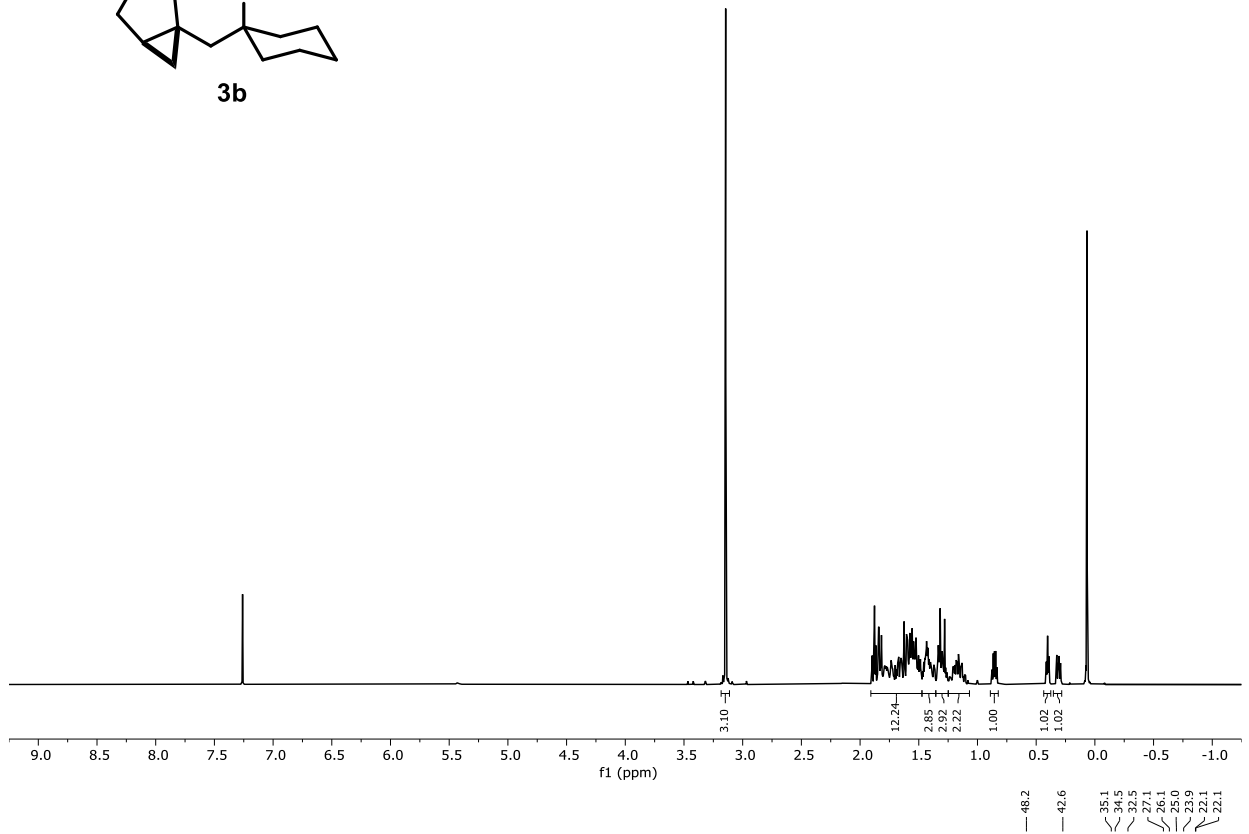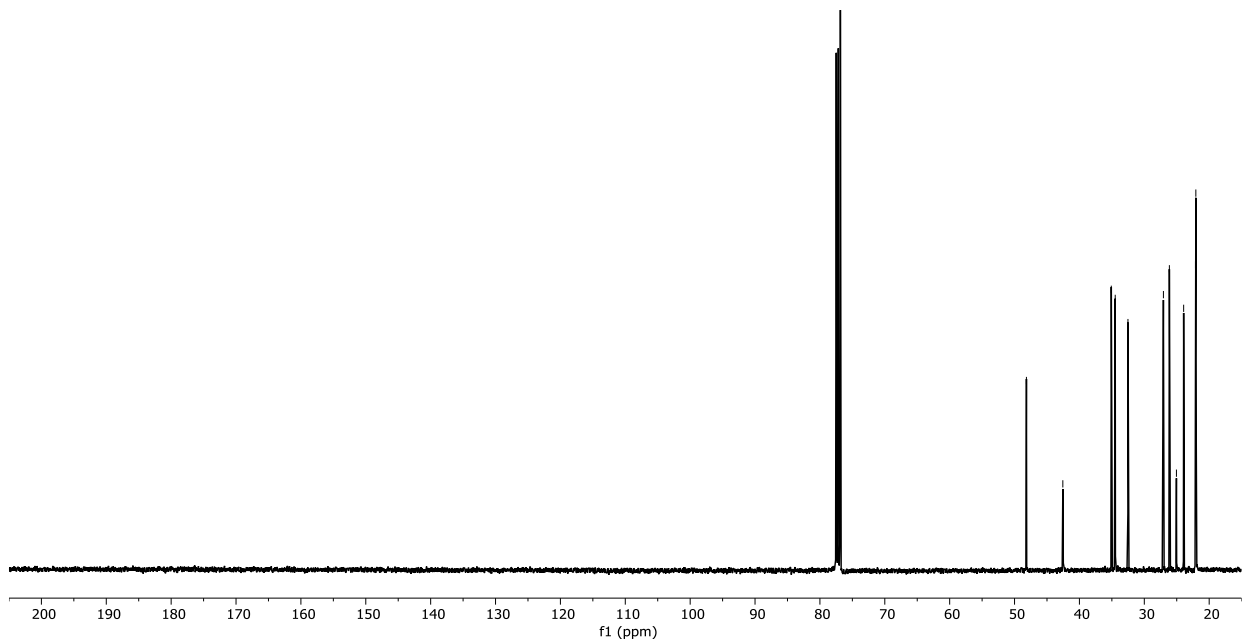

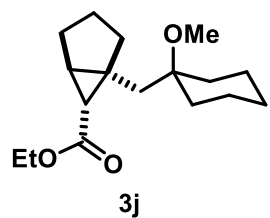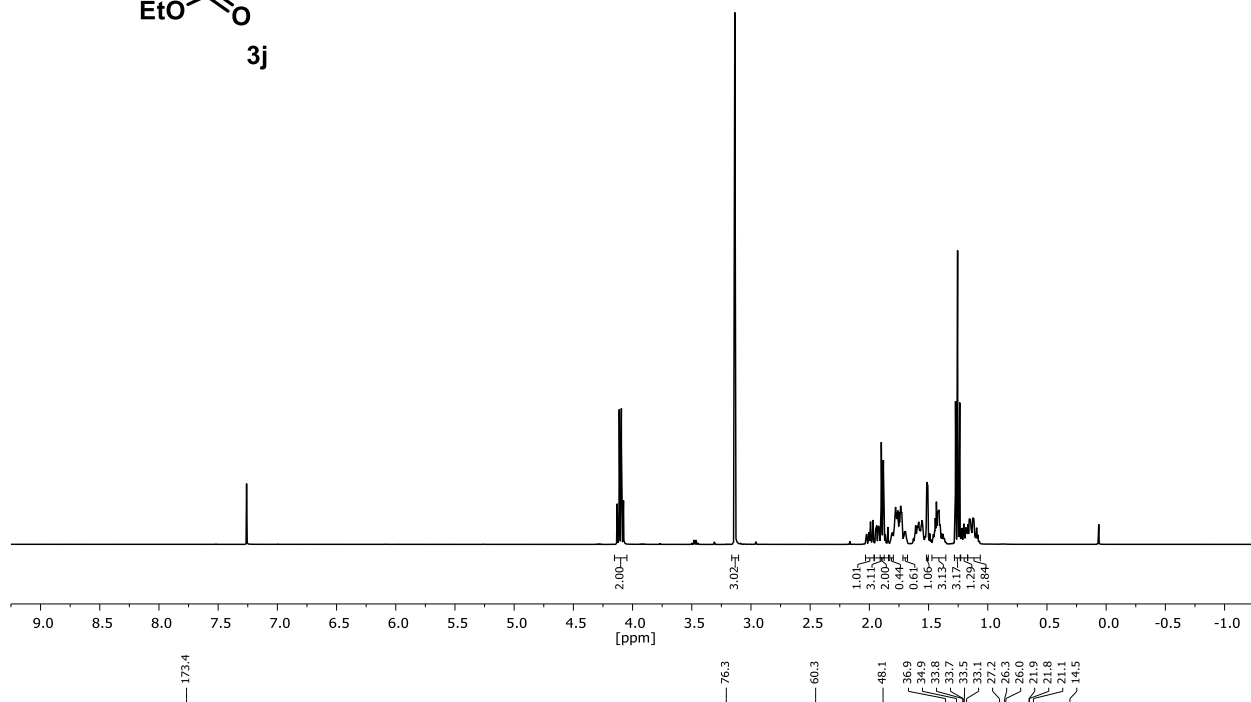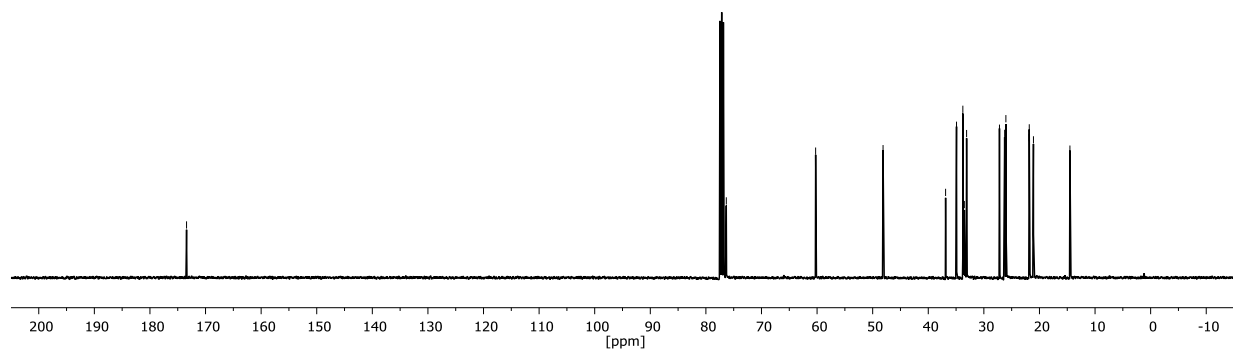

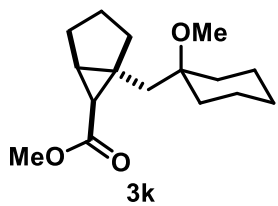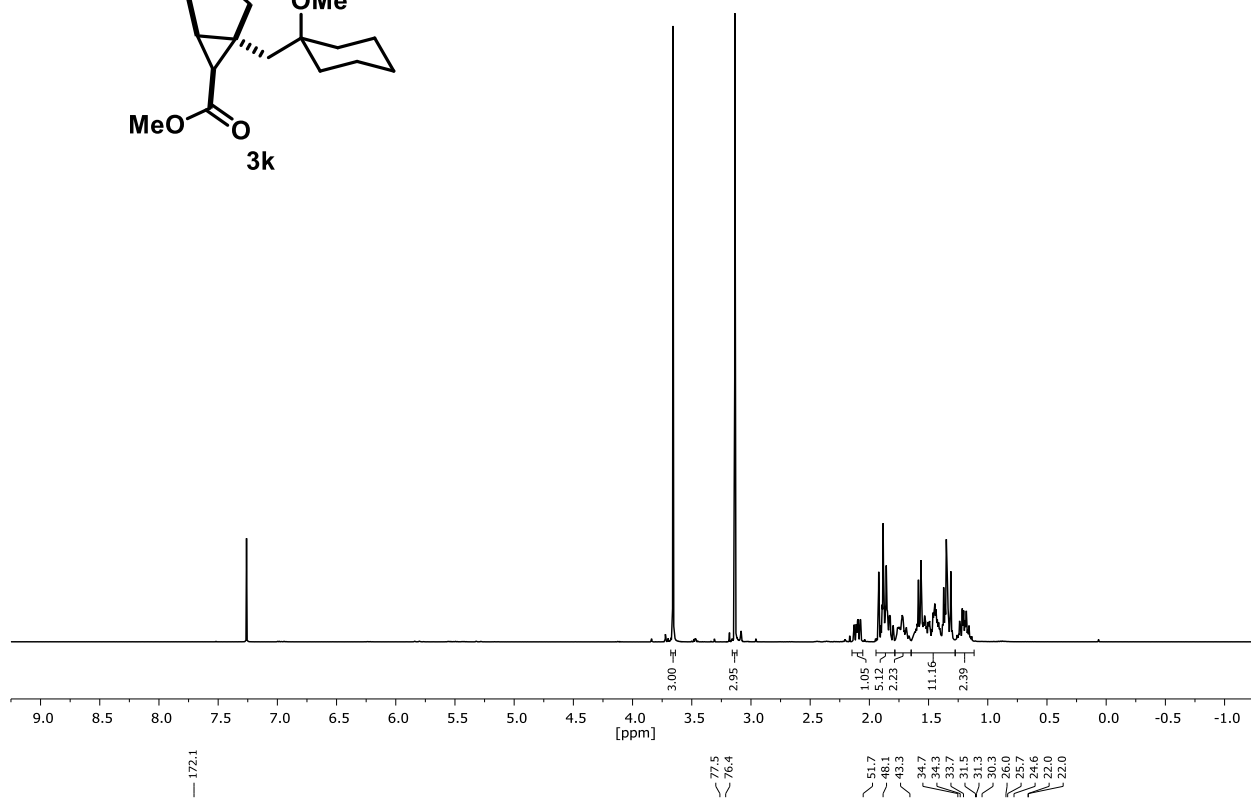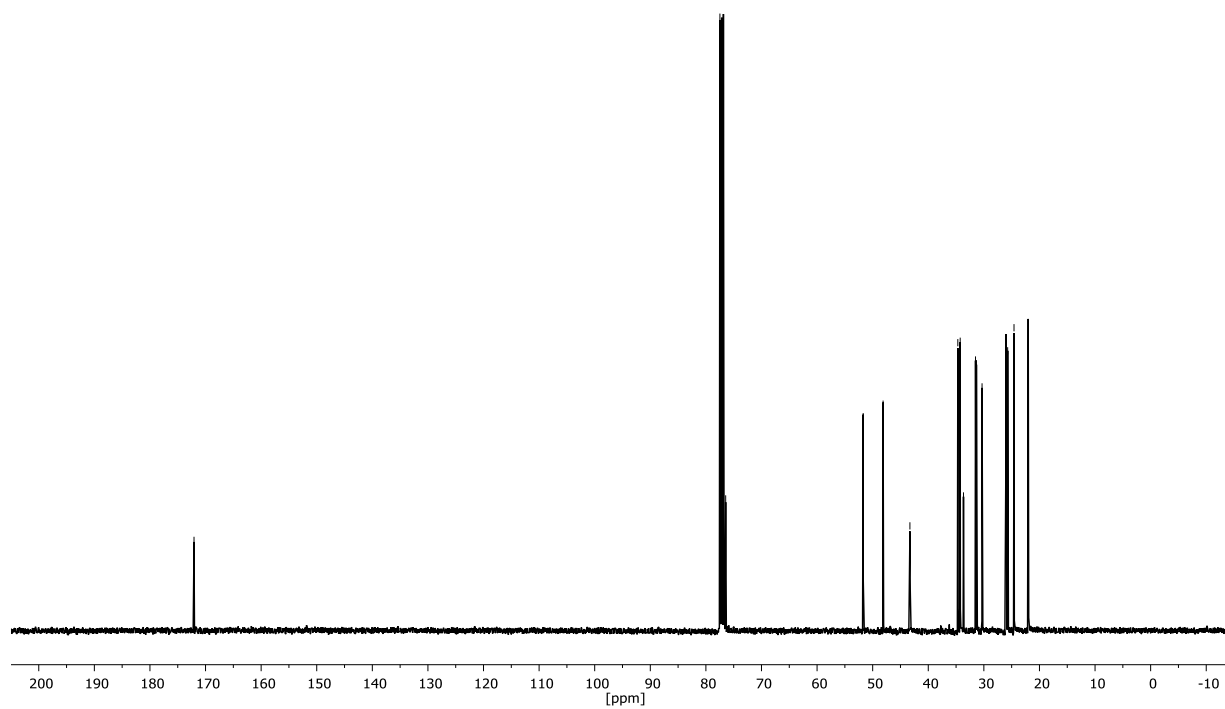



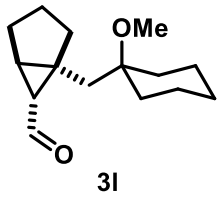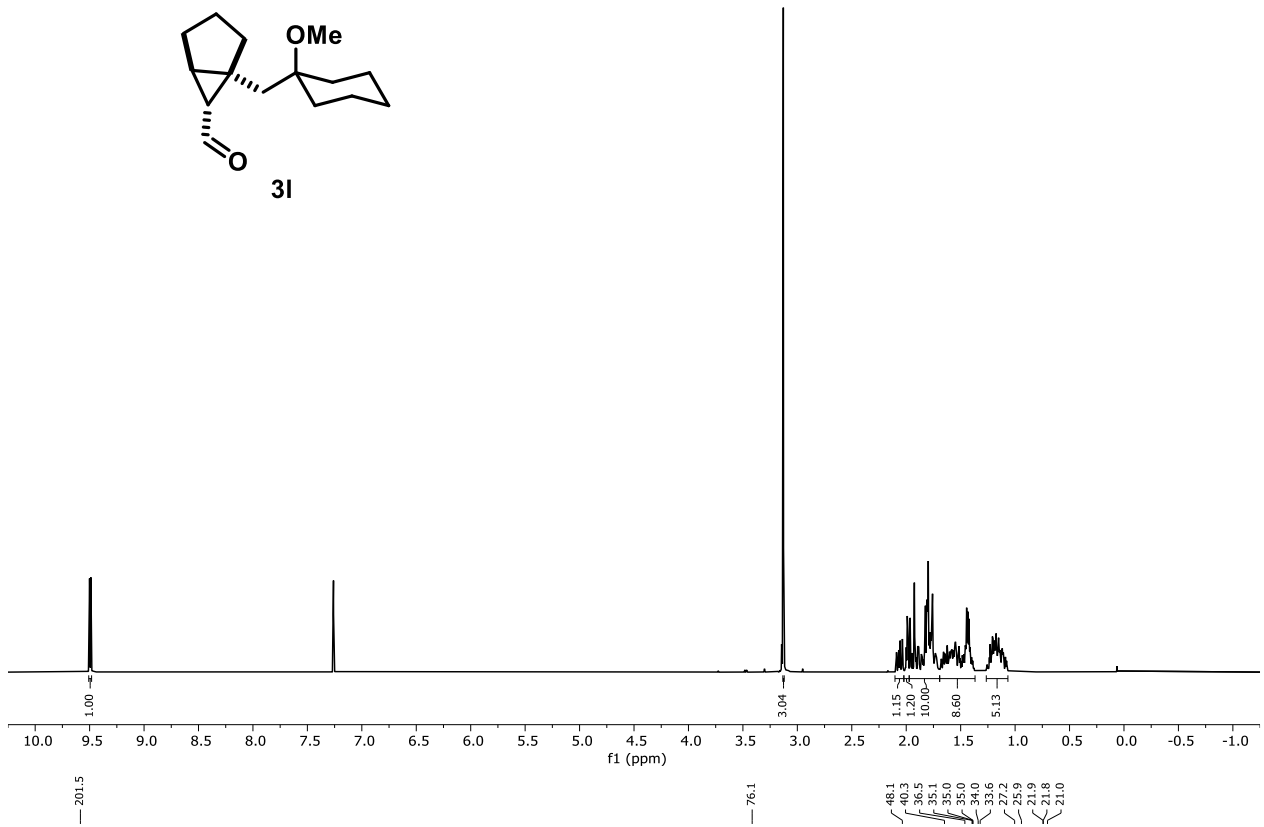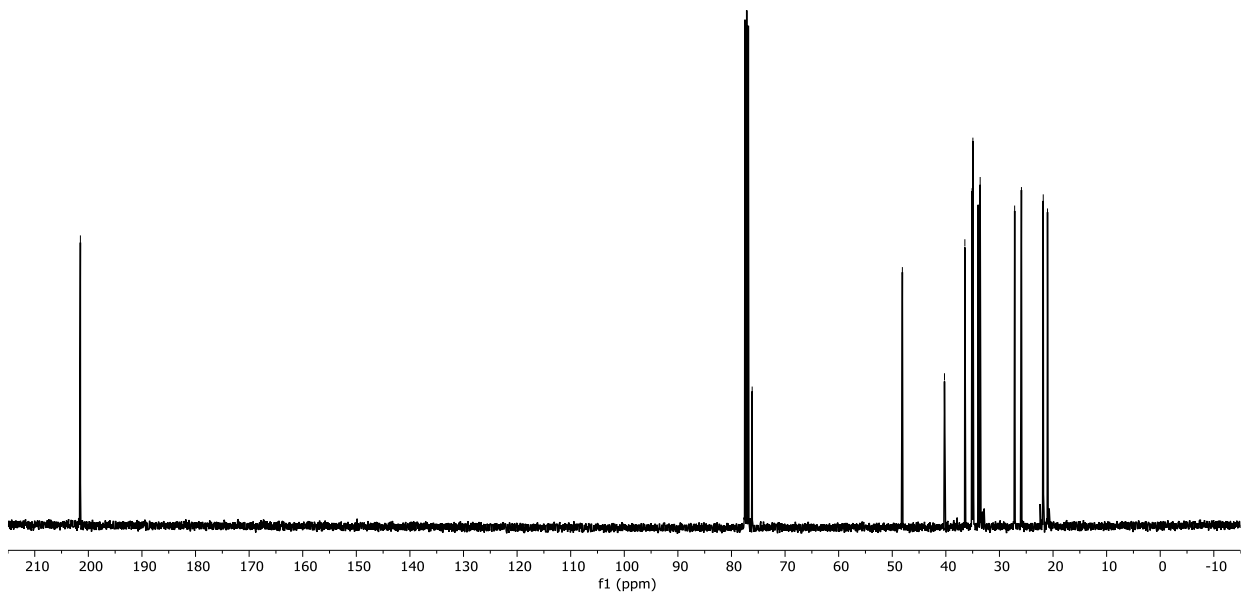

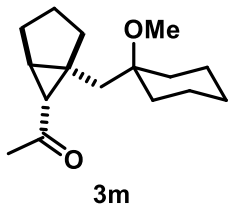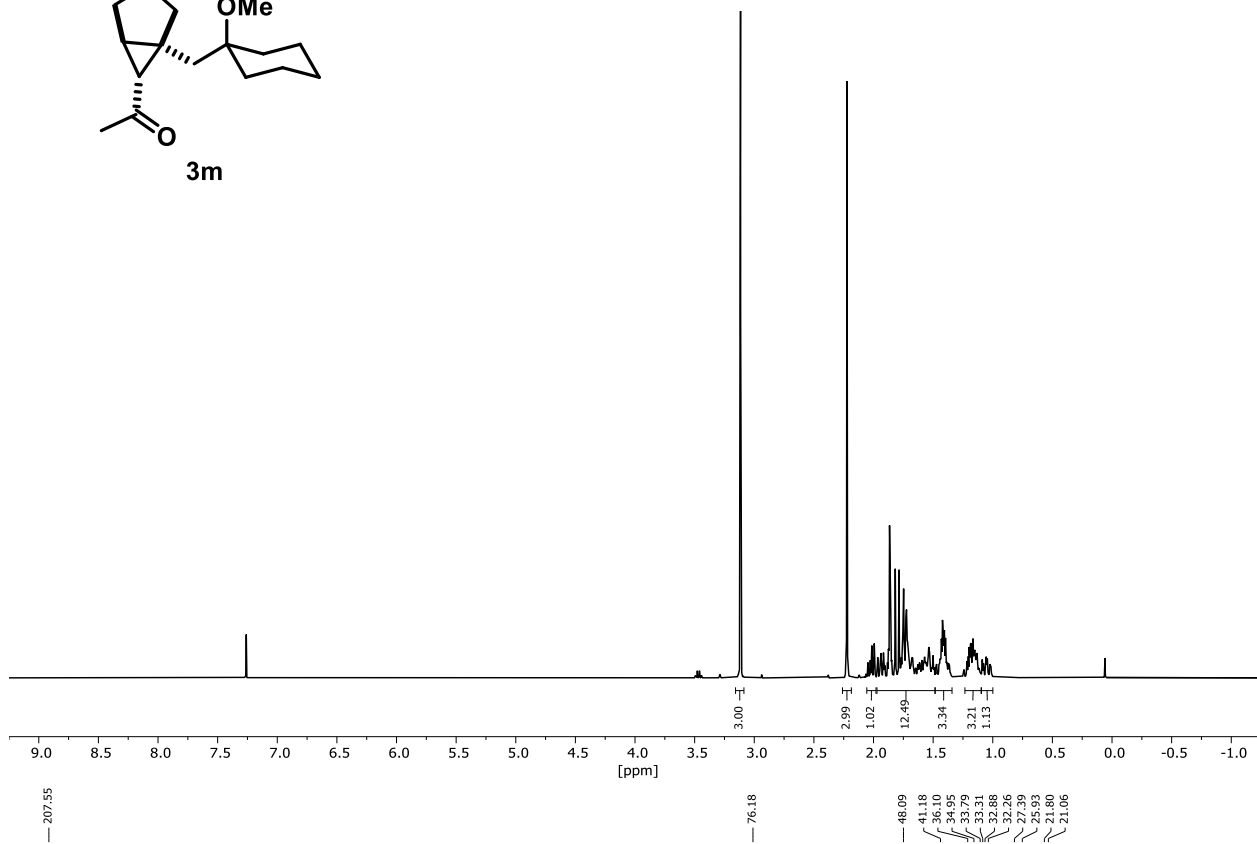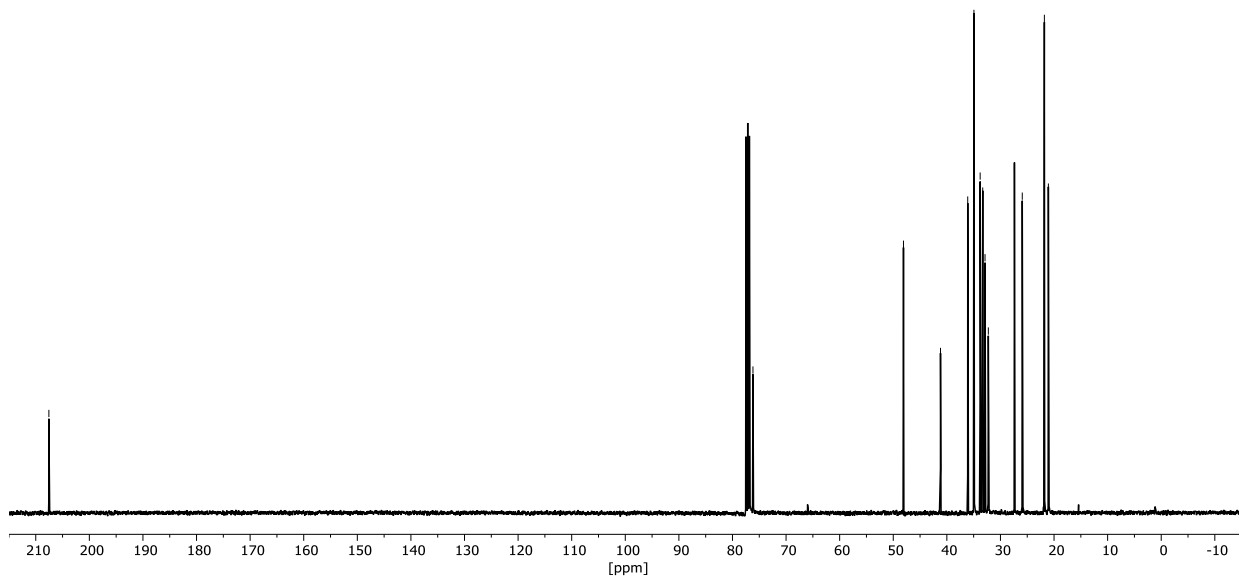

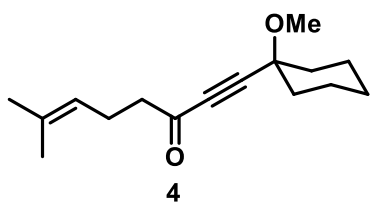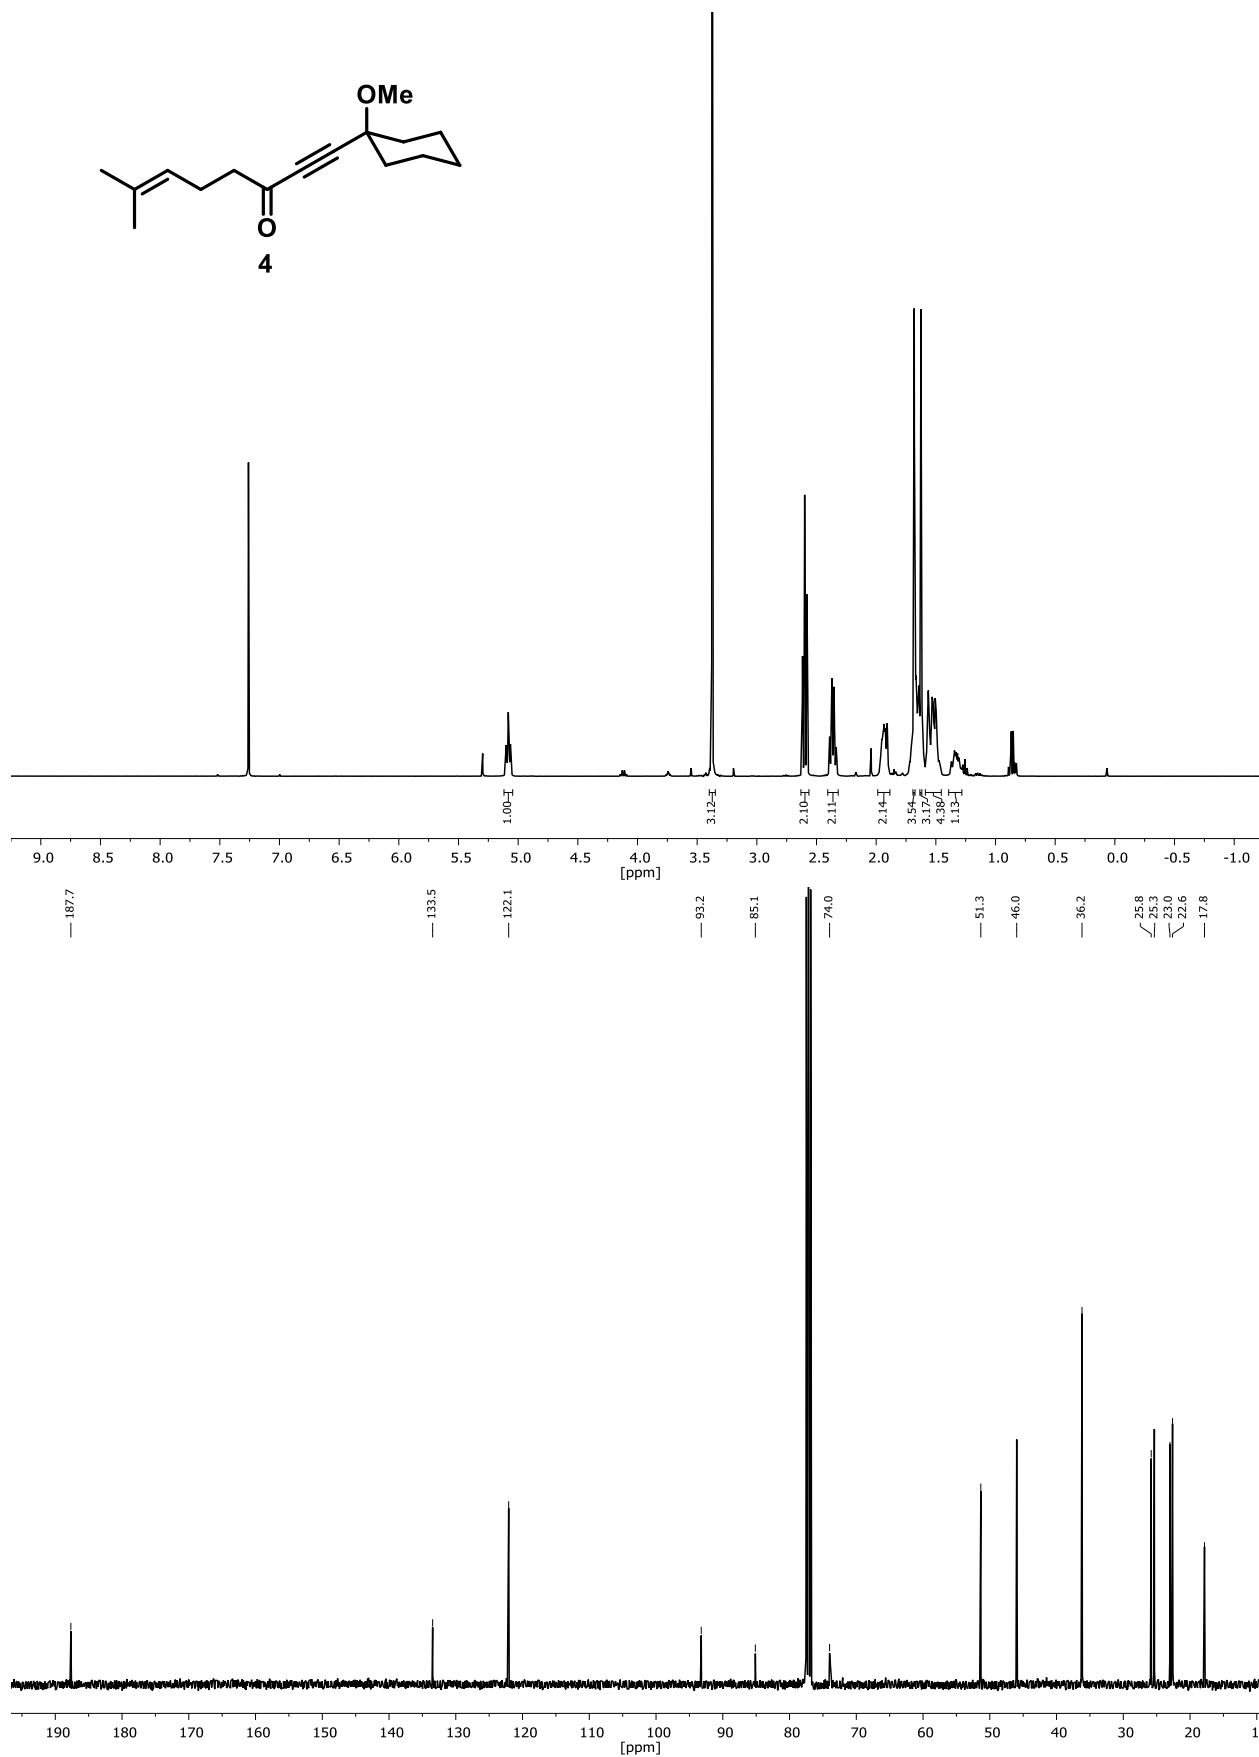

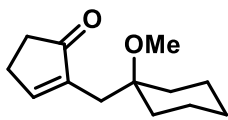

5

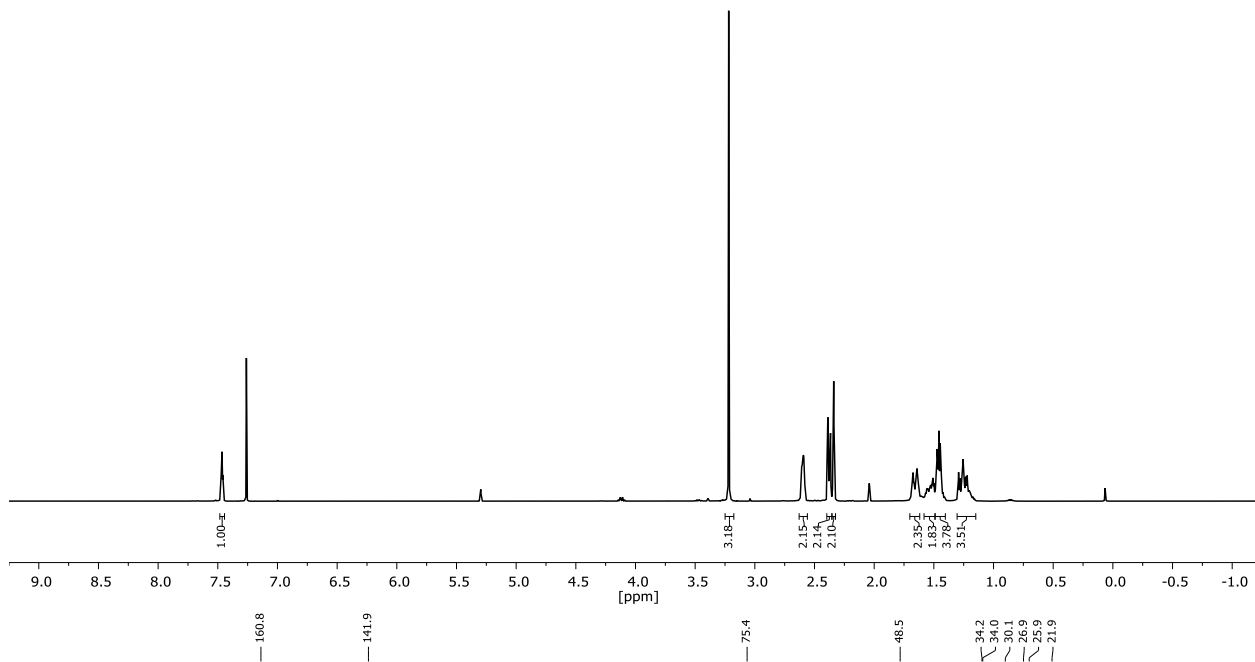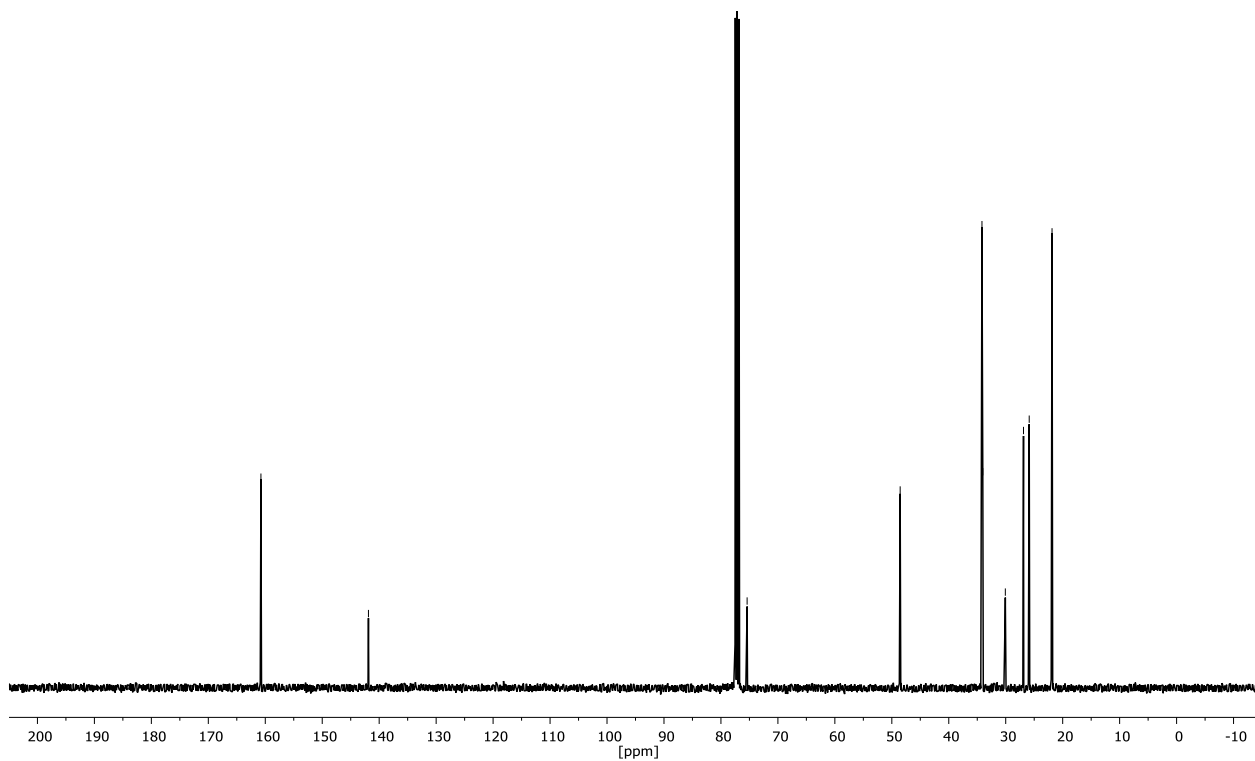

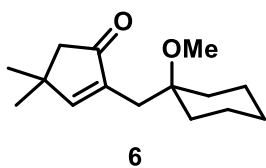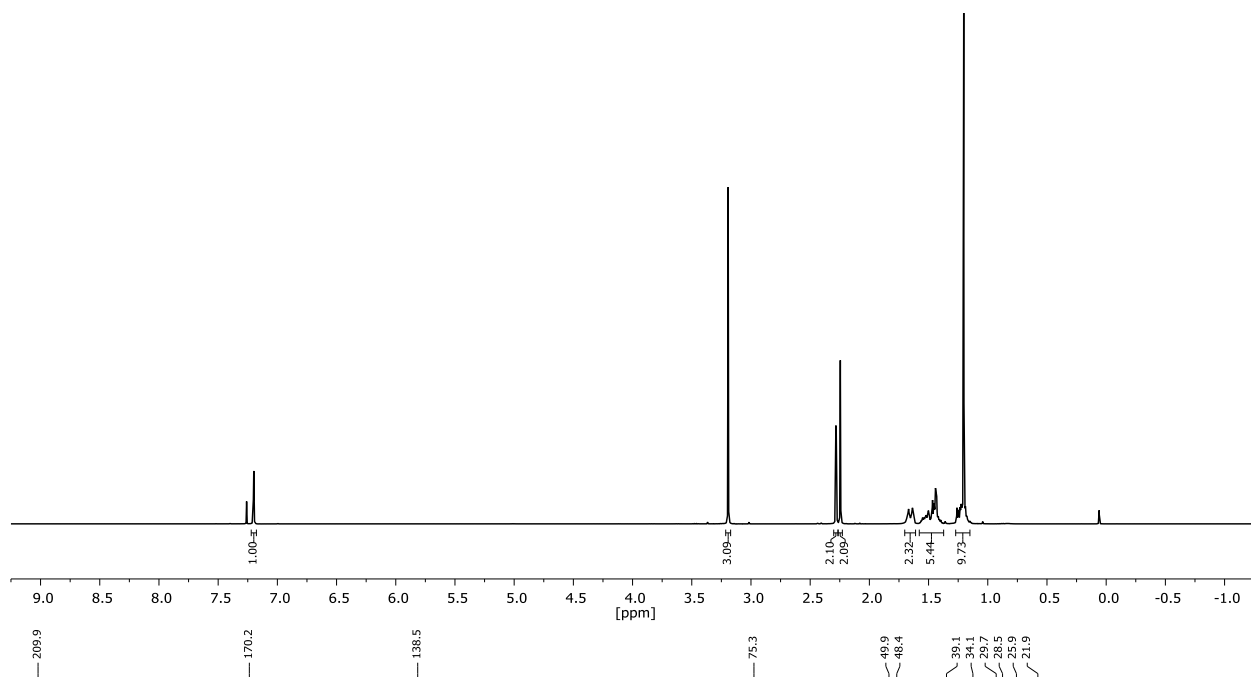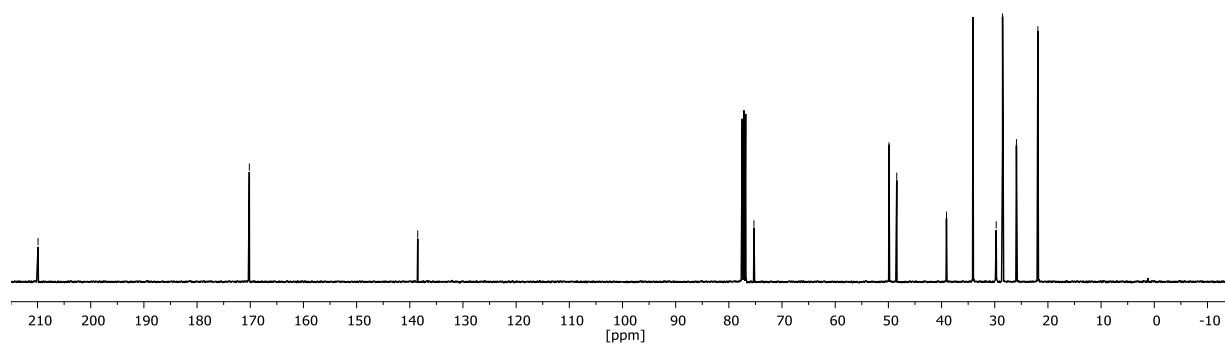

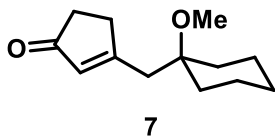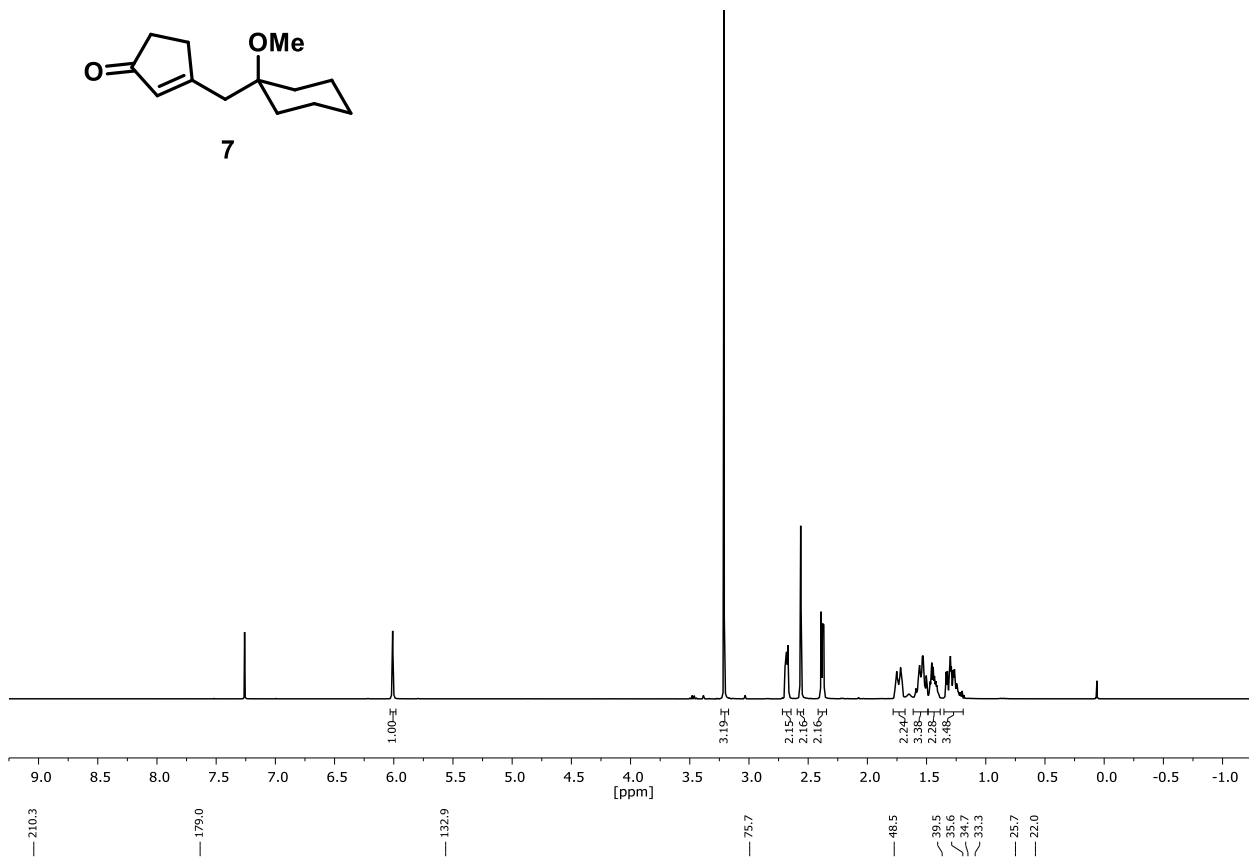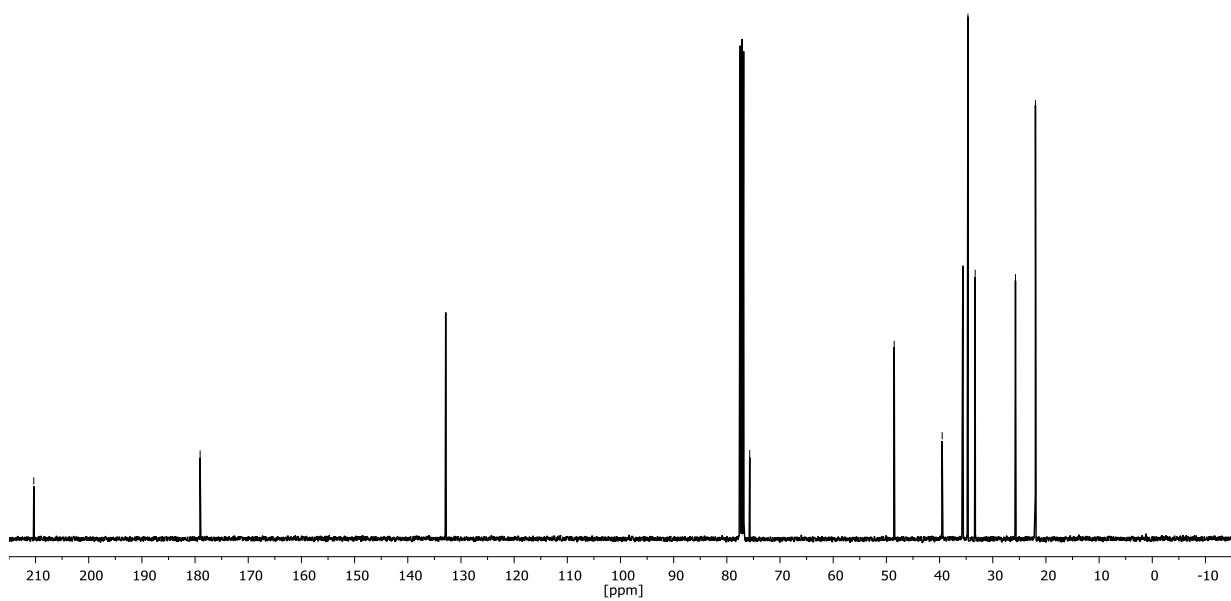

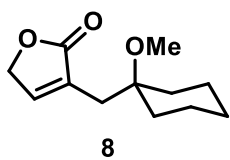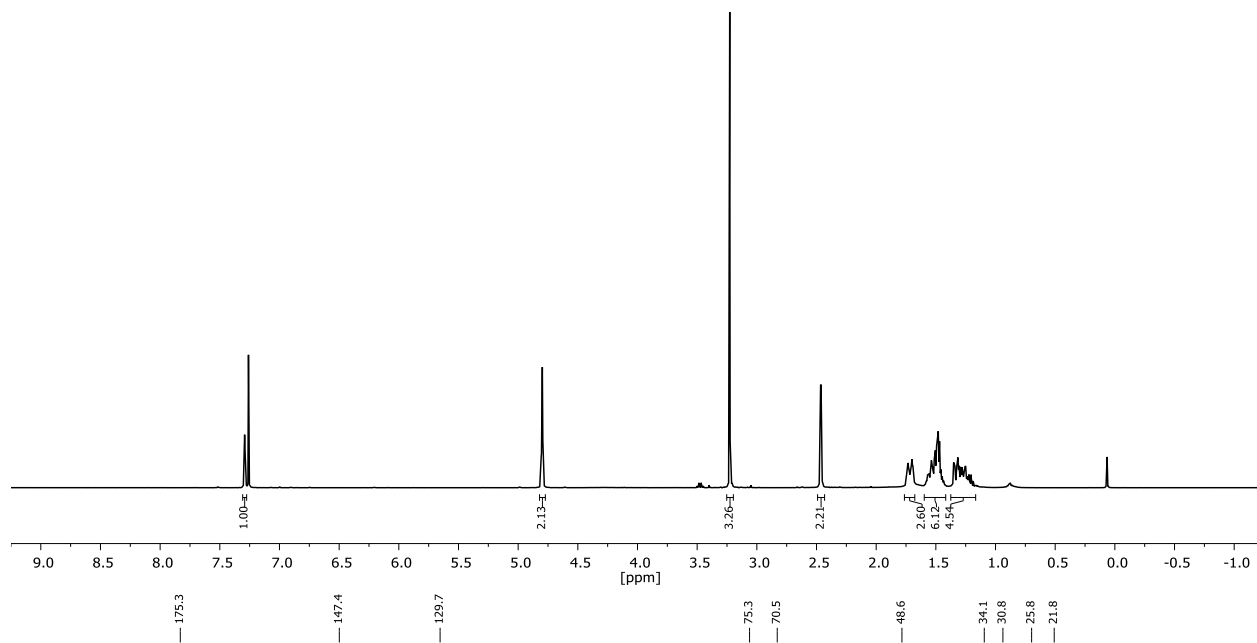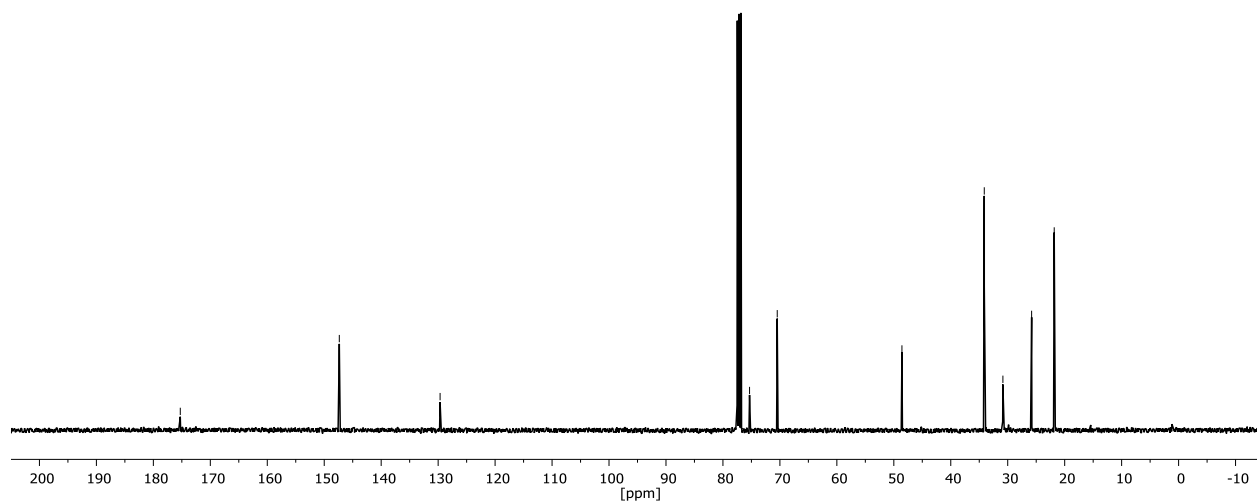

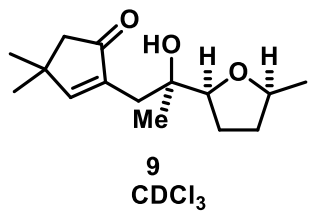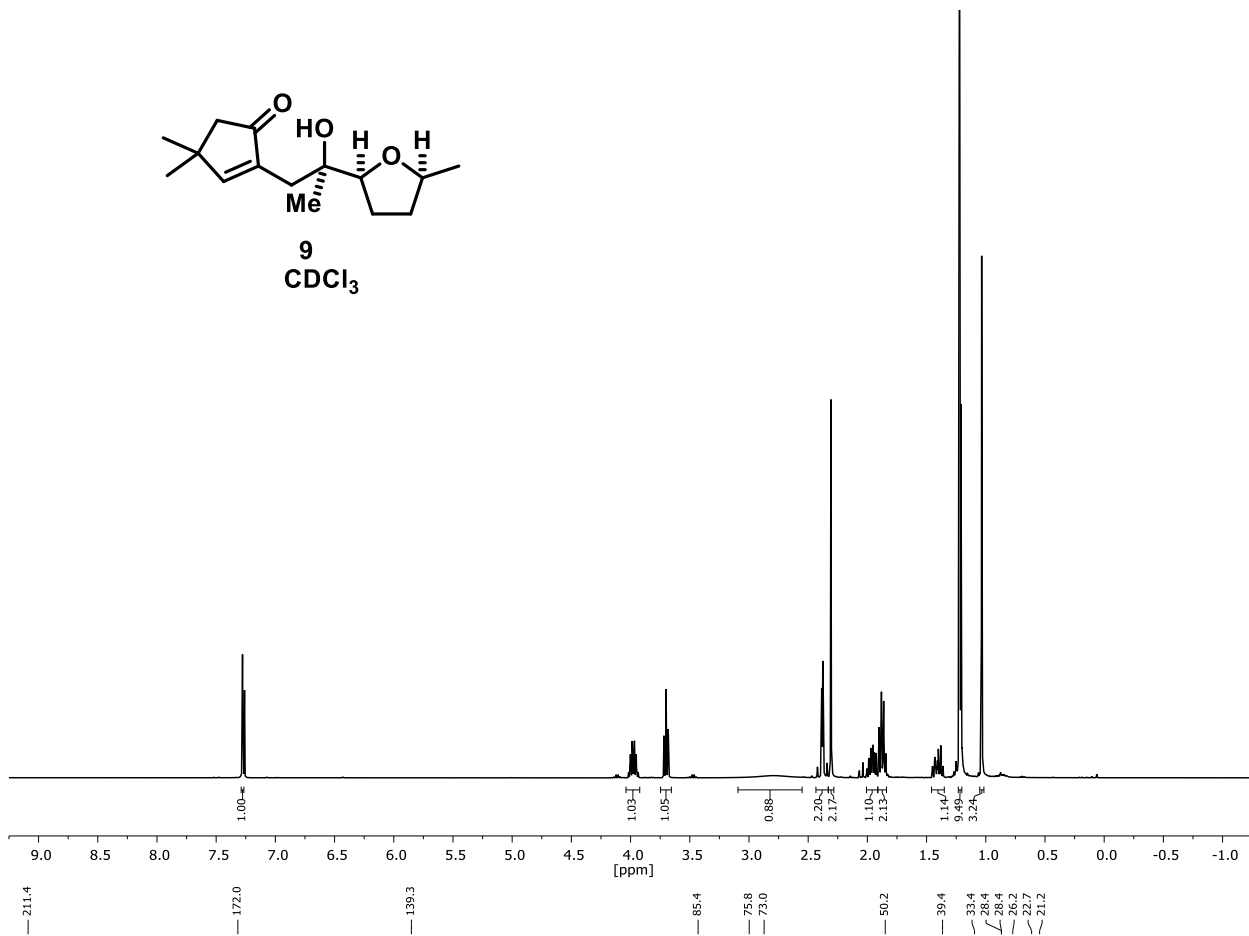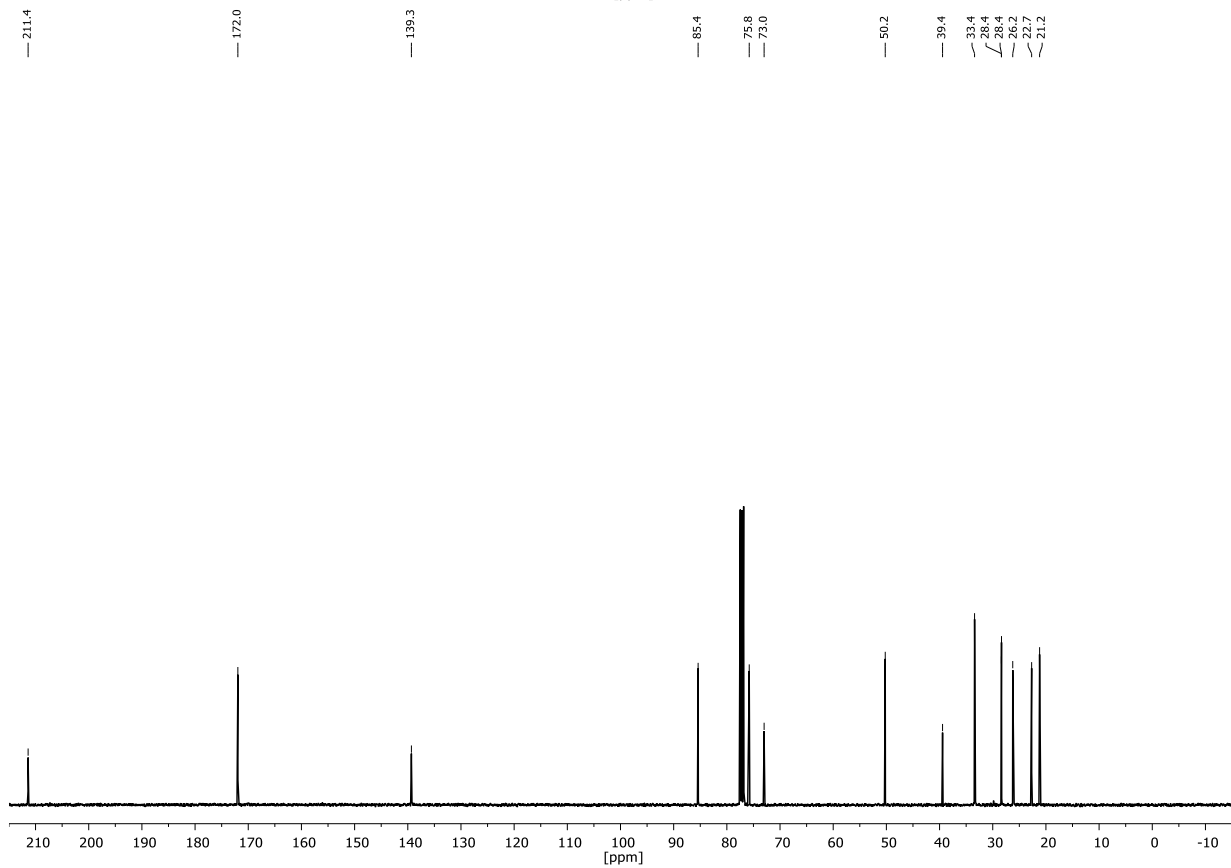



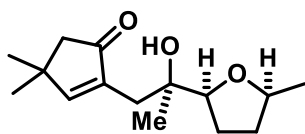

**9**  
d<sub>6</sub>-DMSO

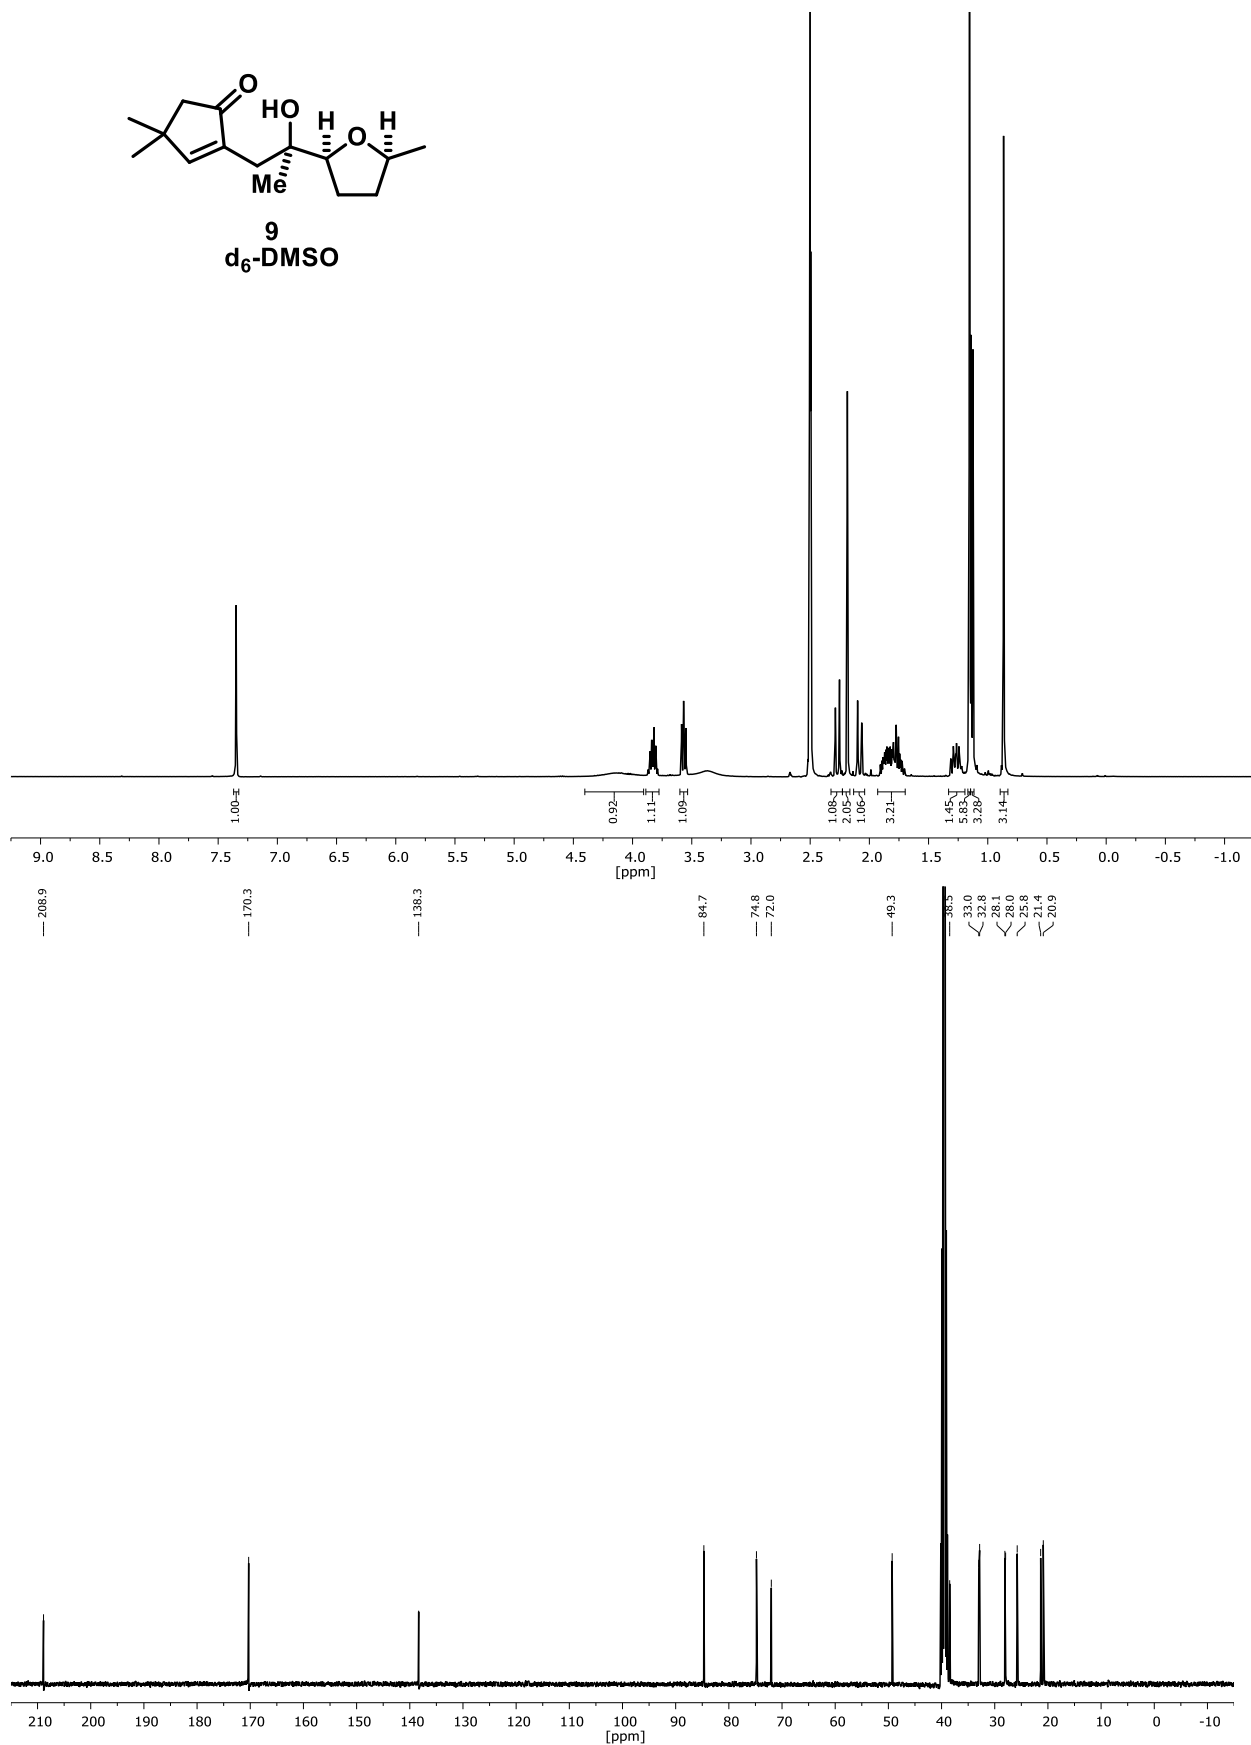

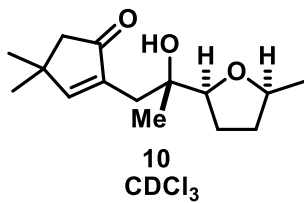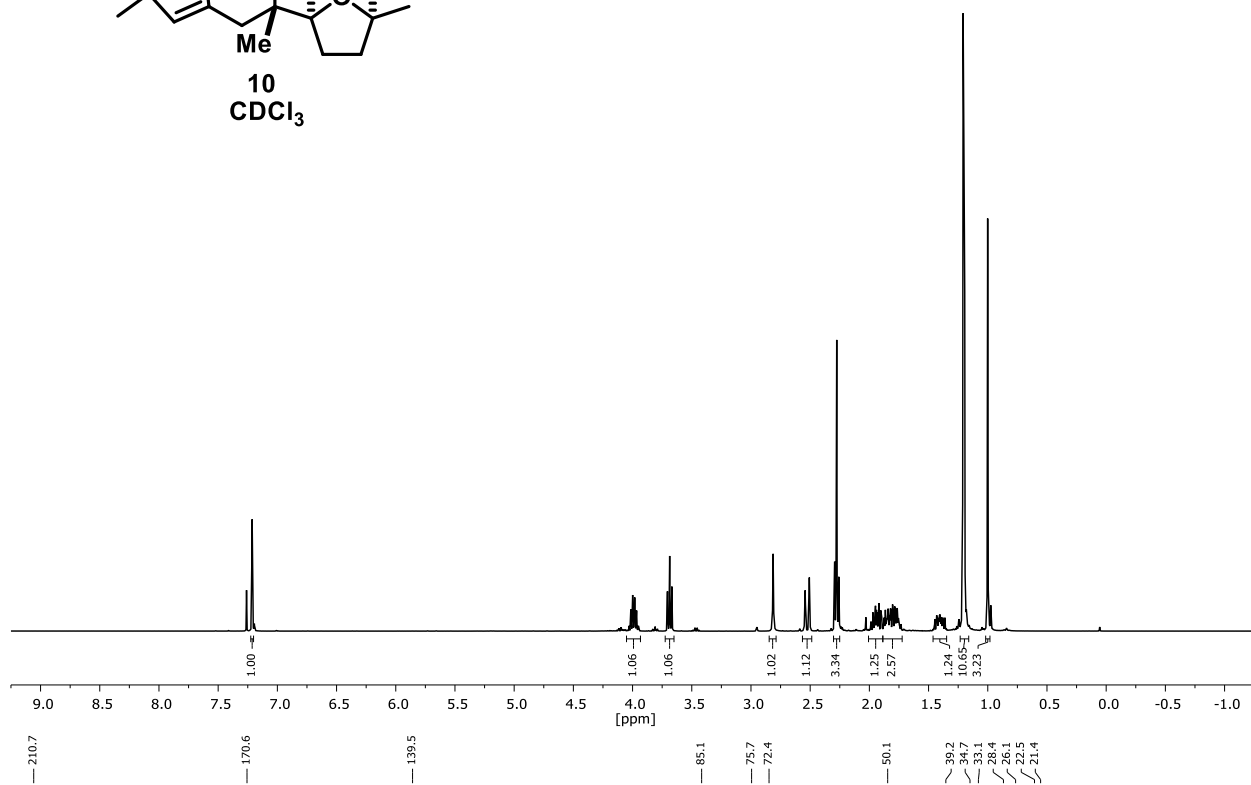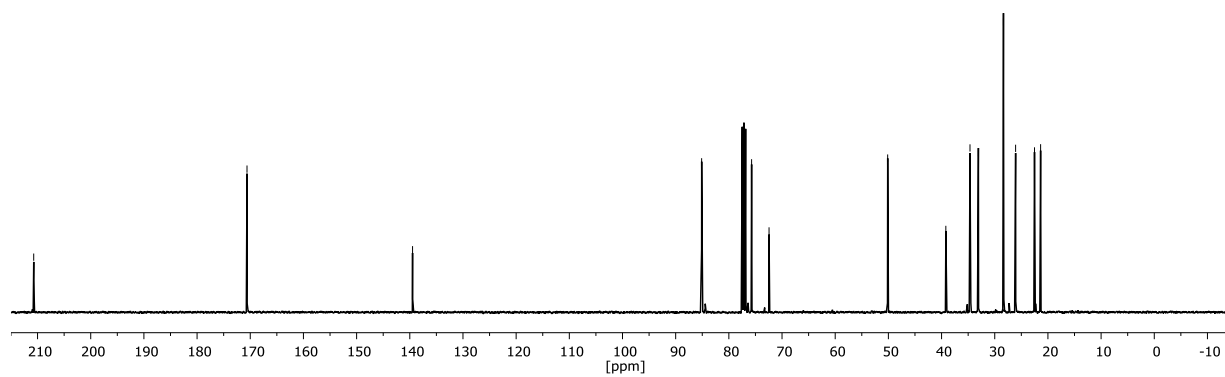

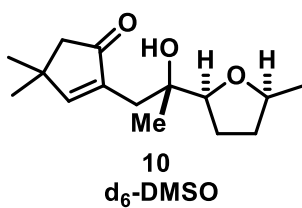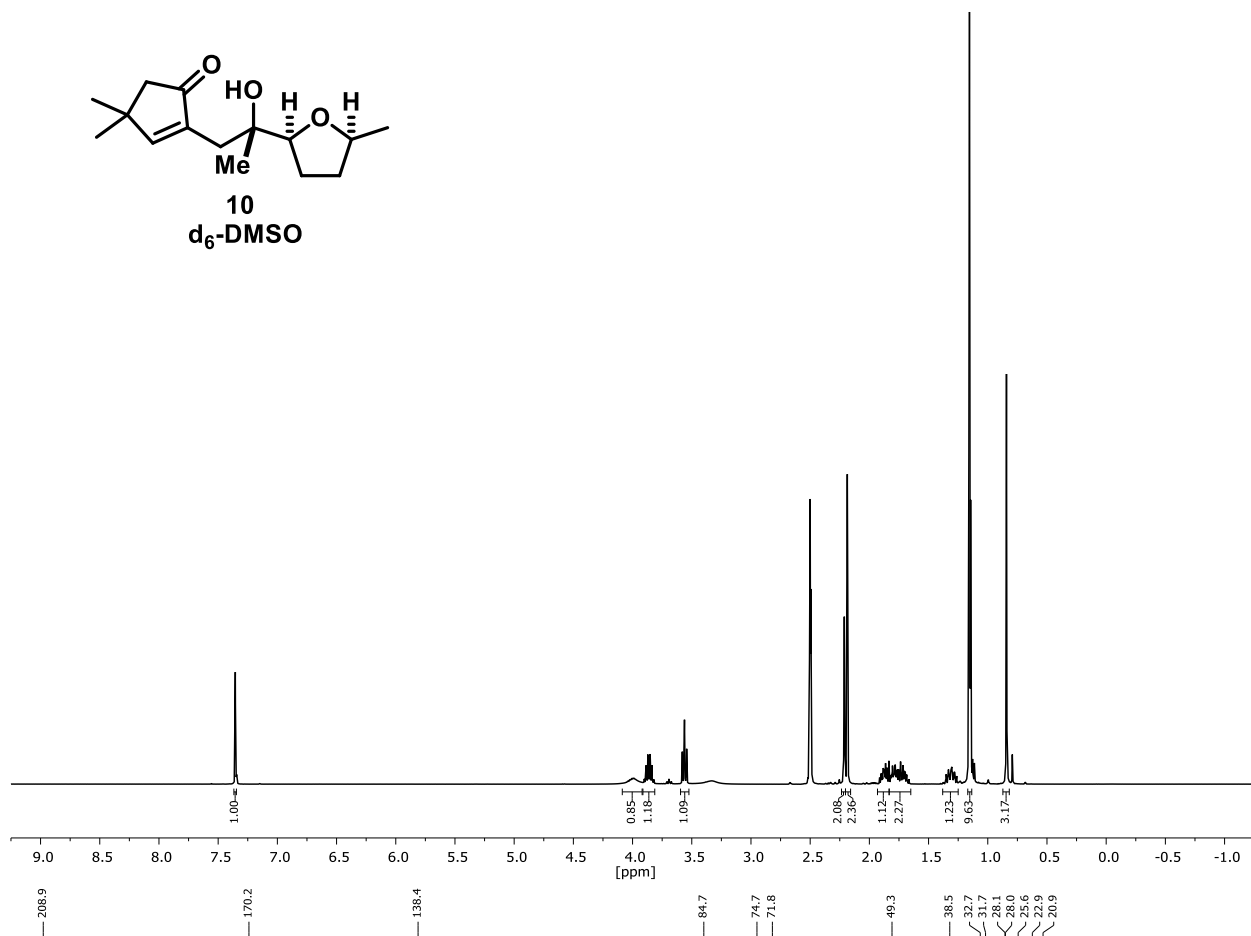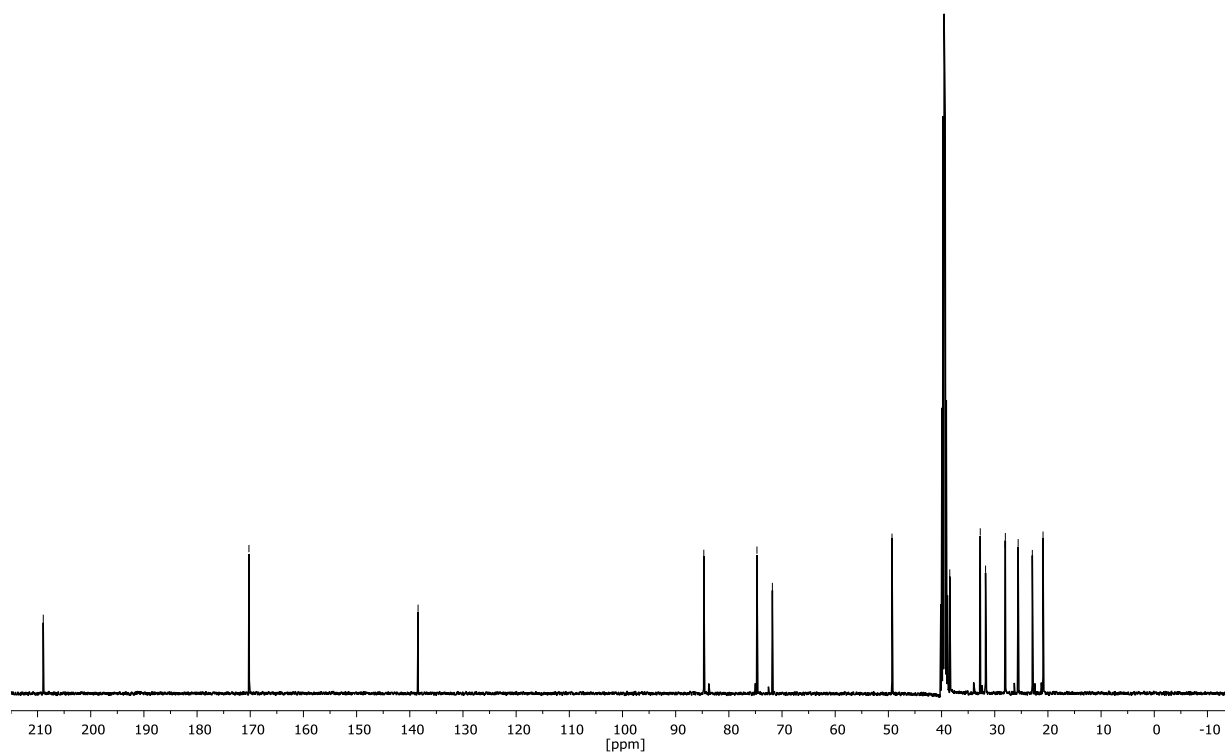

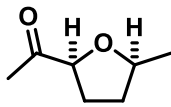

12

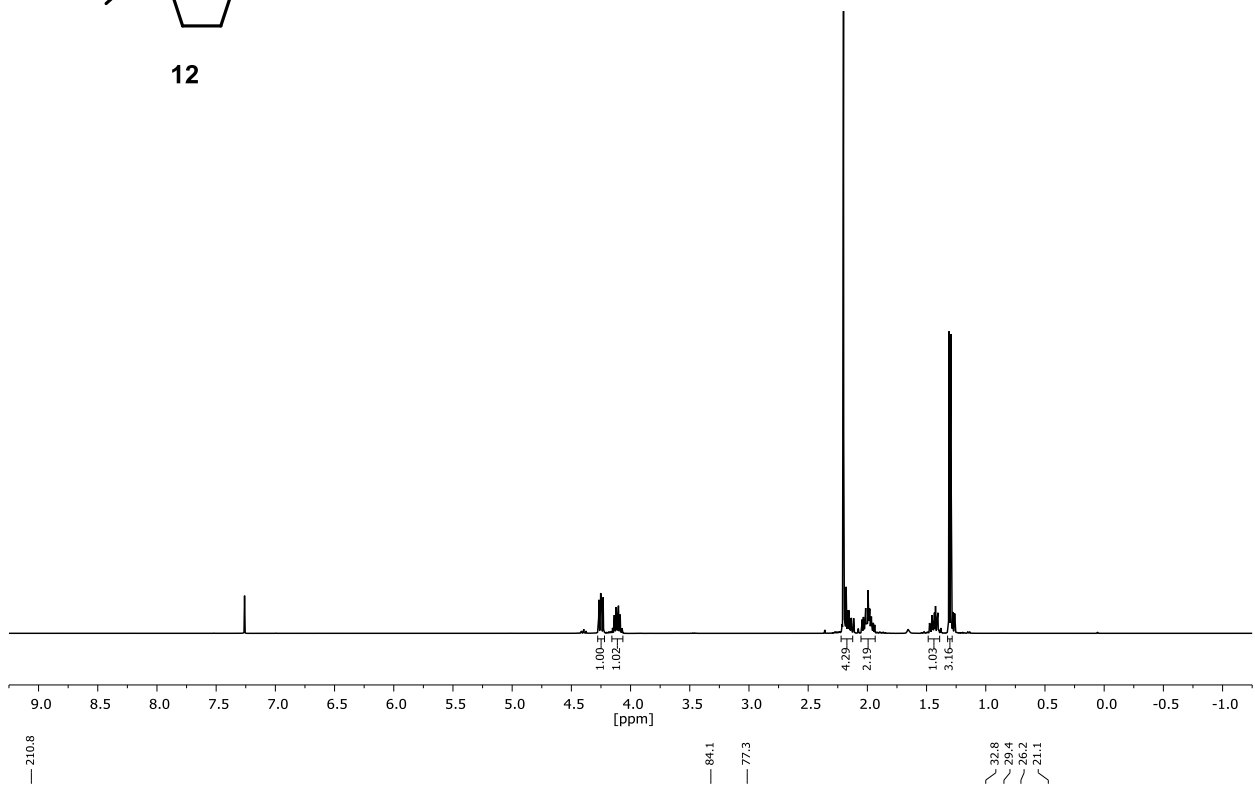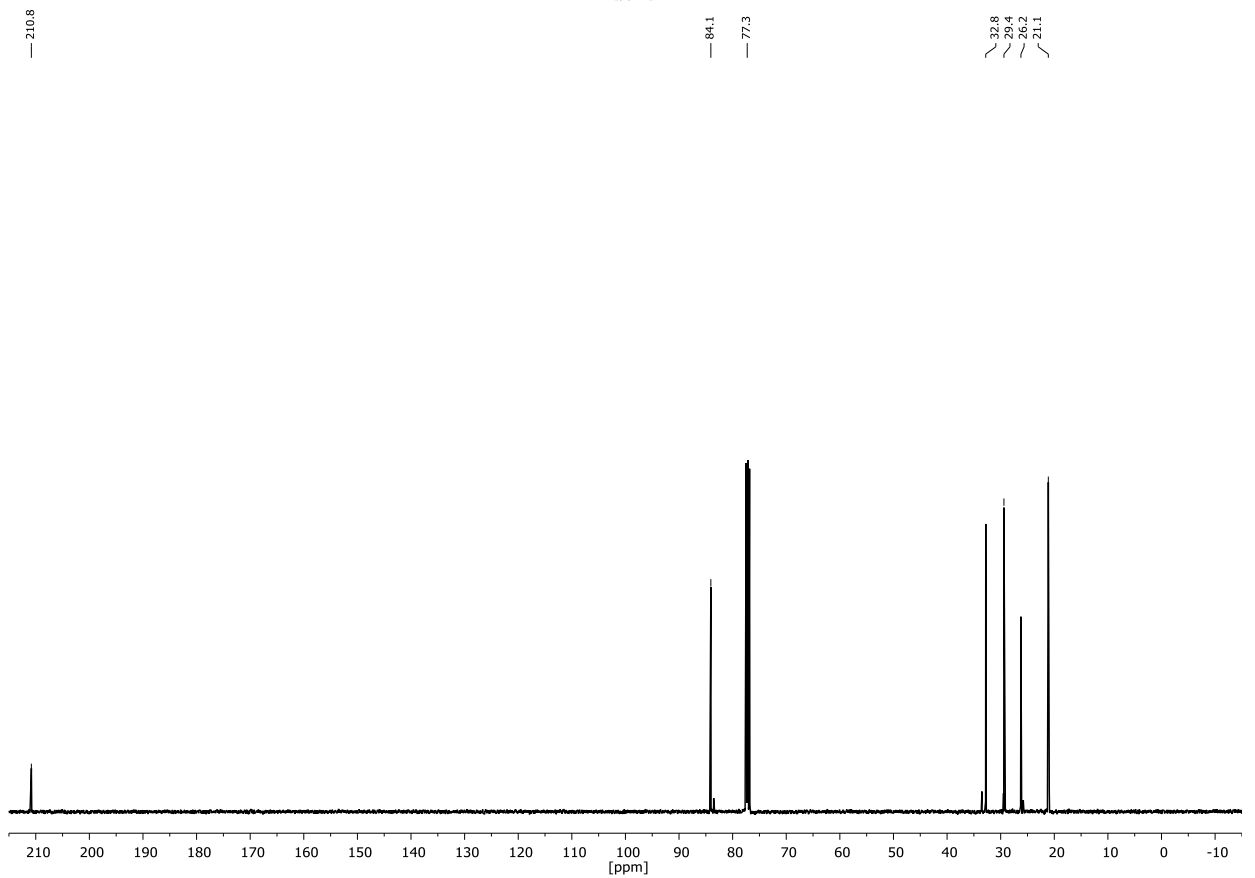

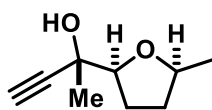

14a

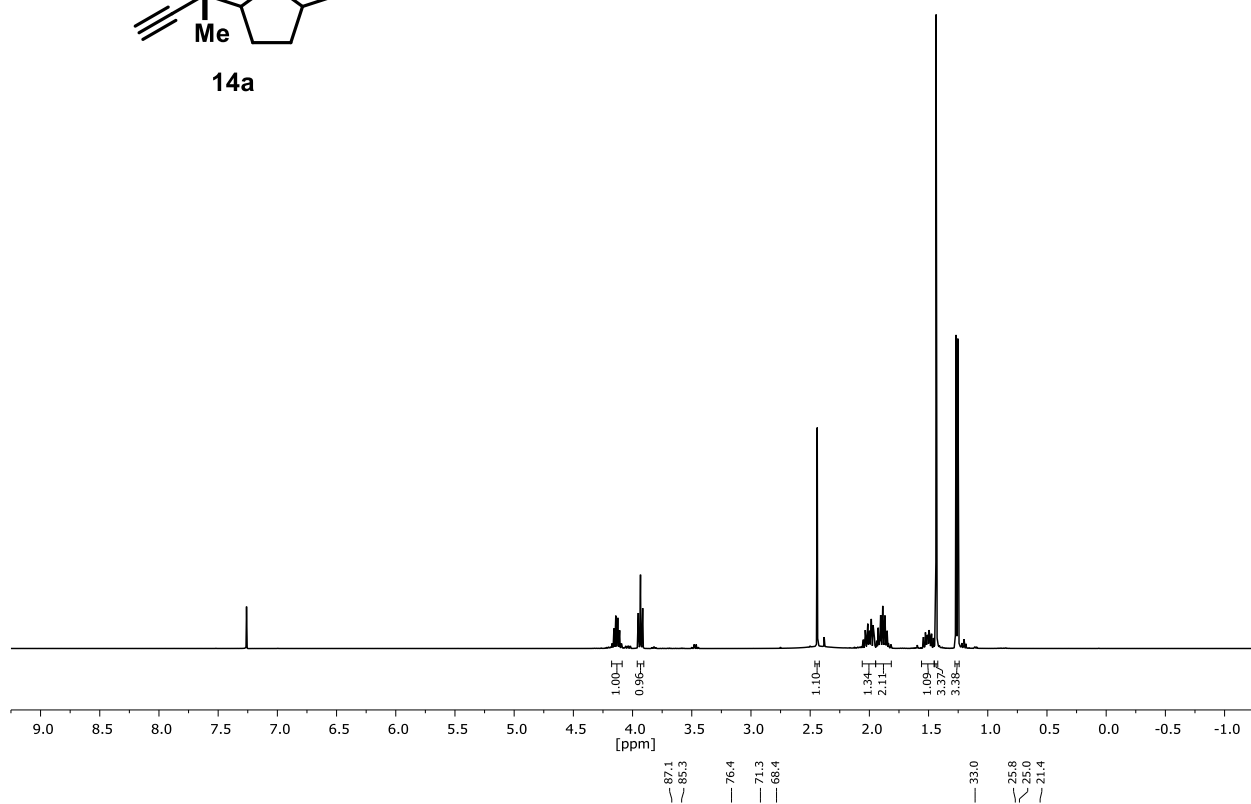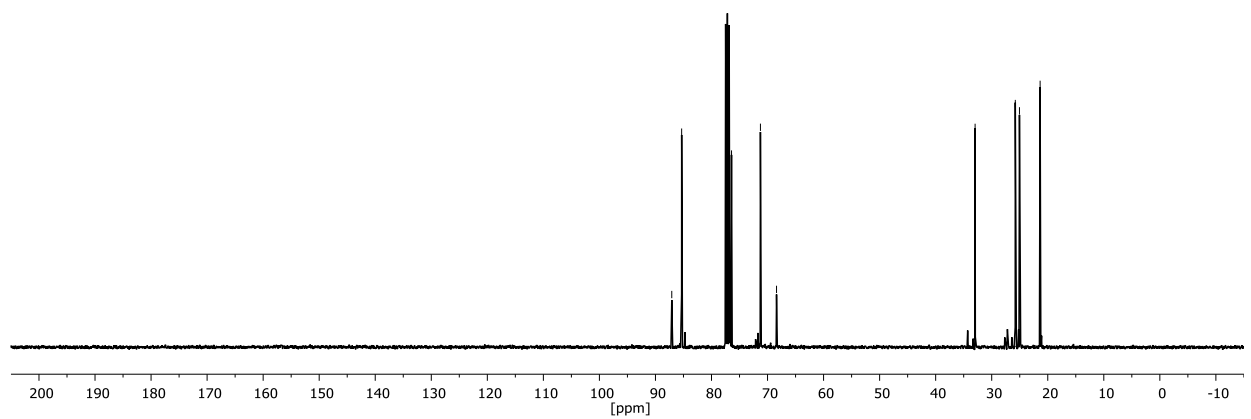

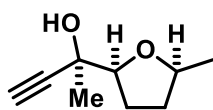

14a'

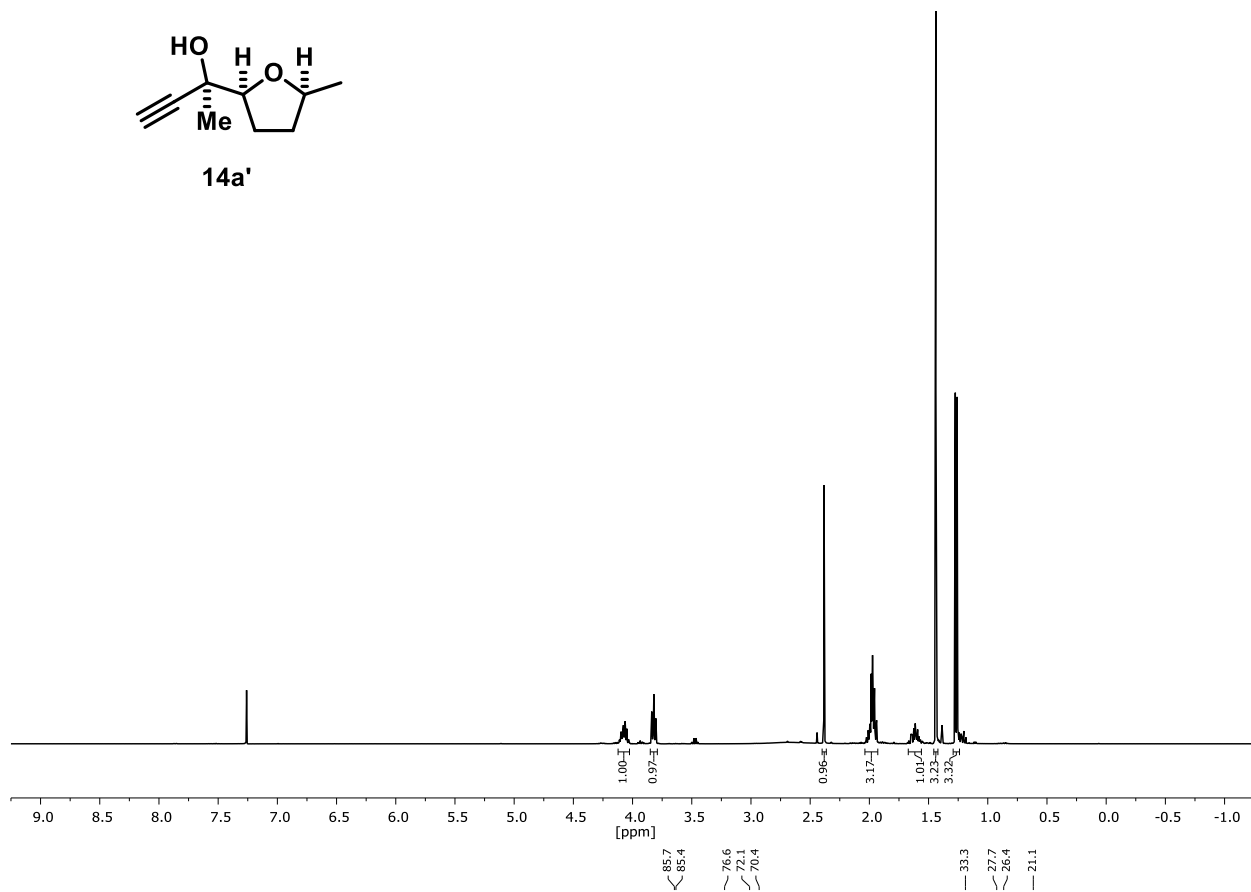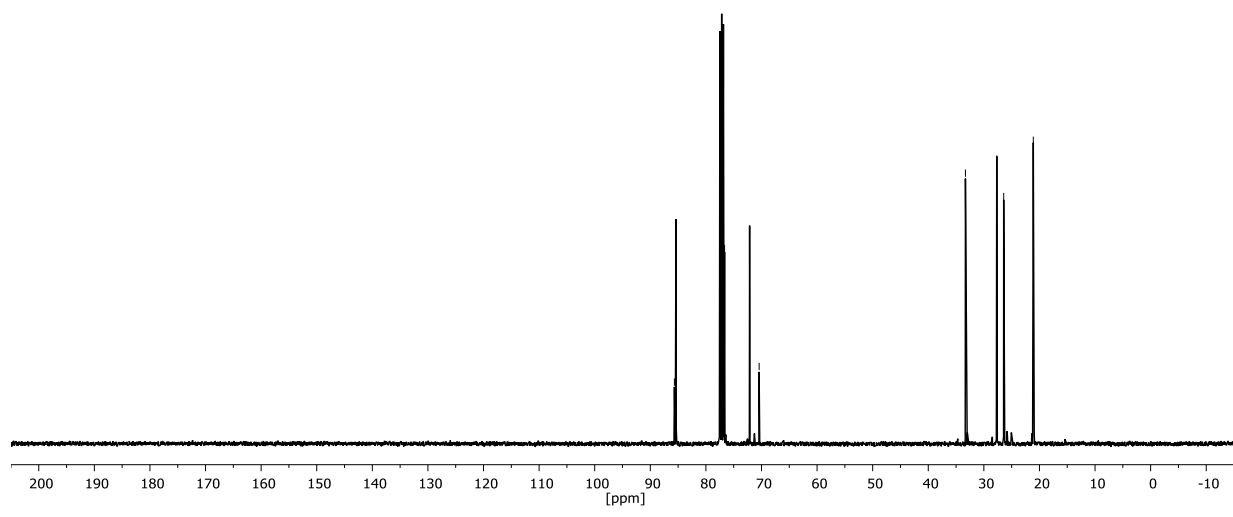

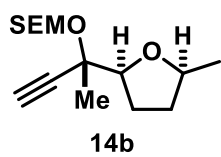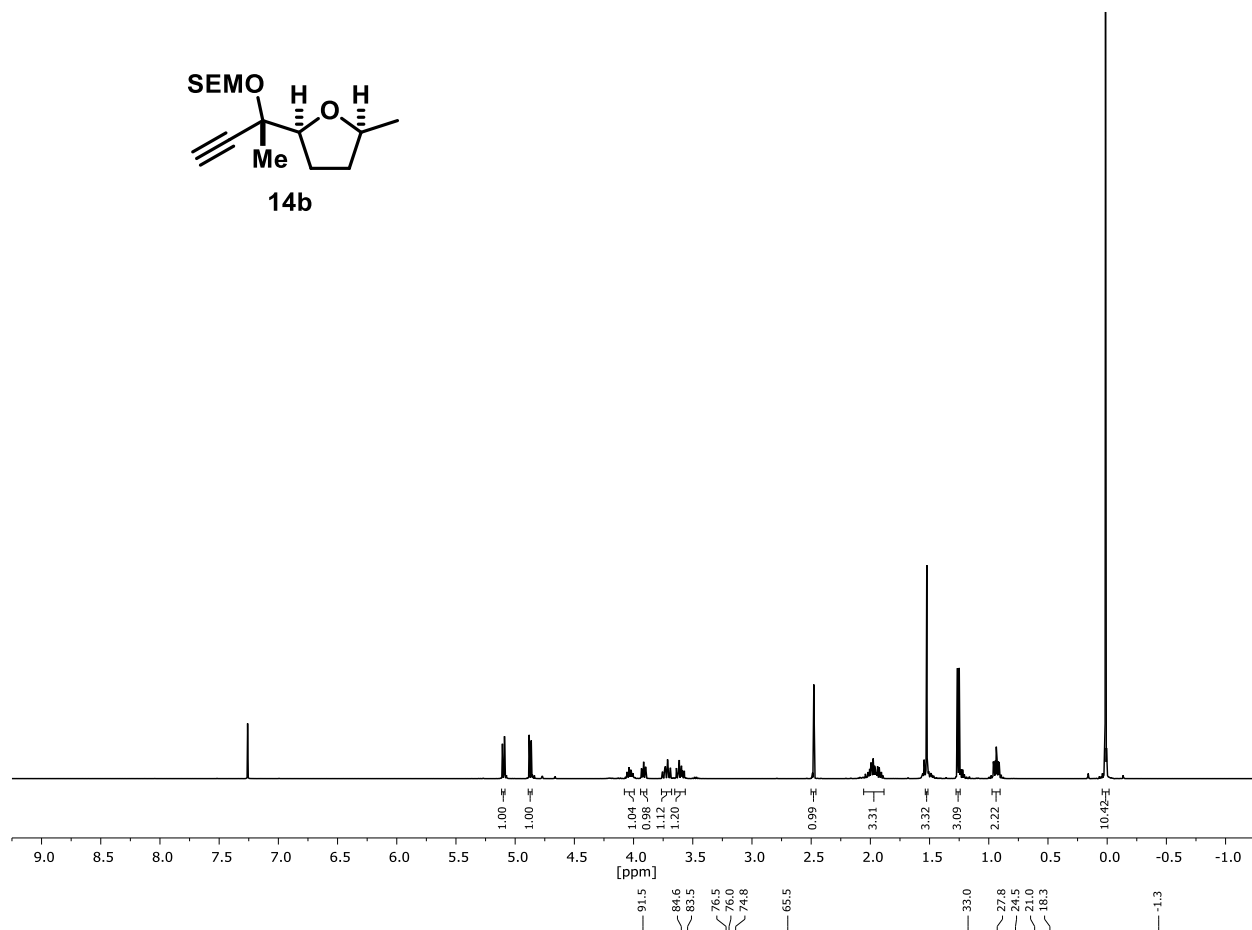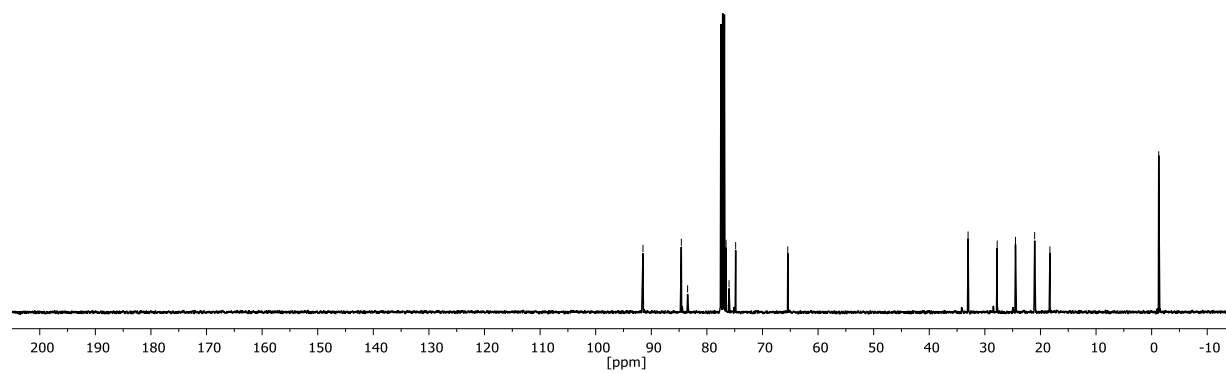

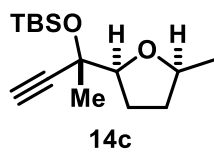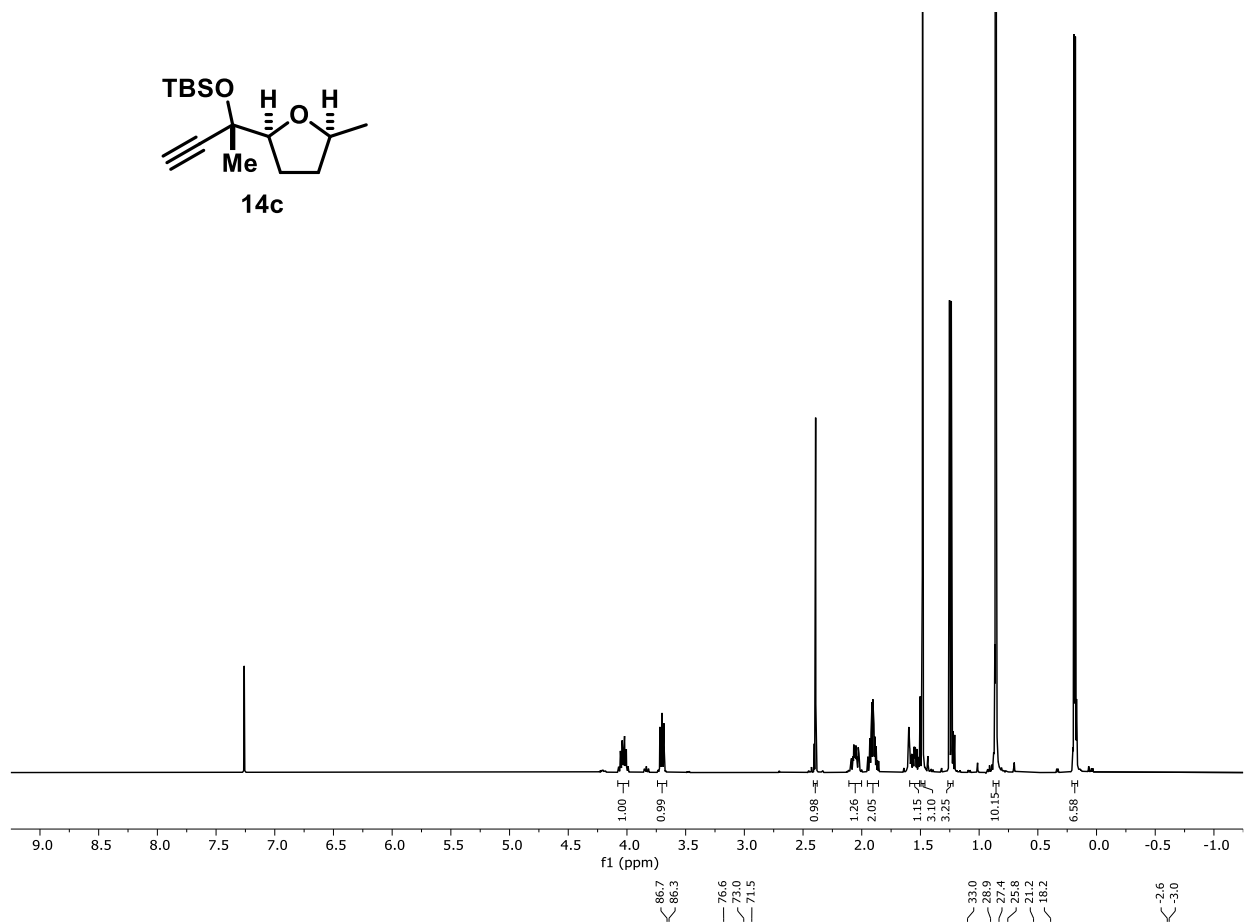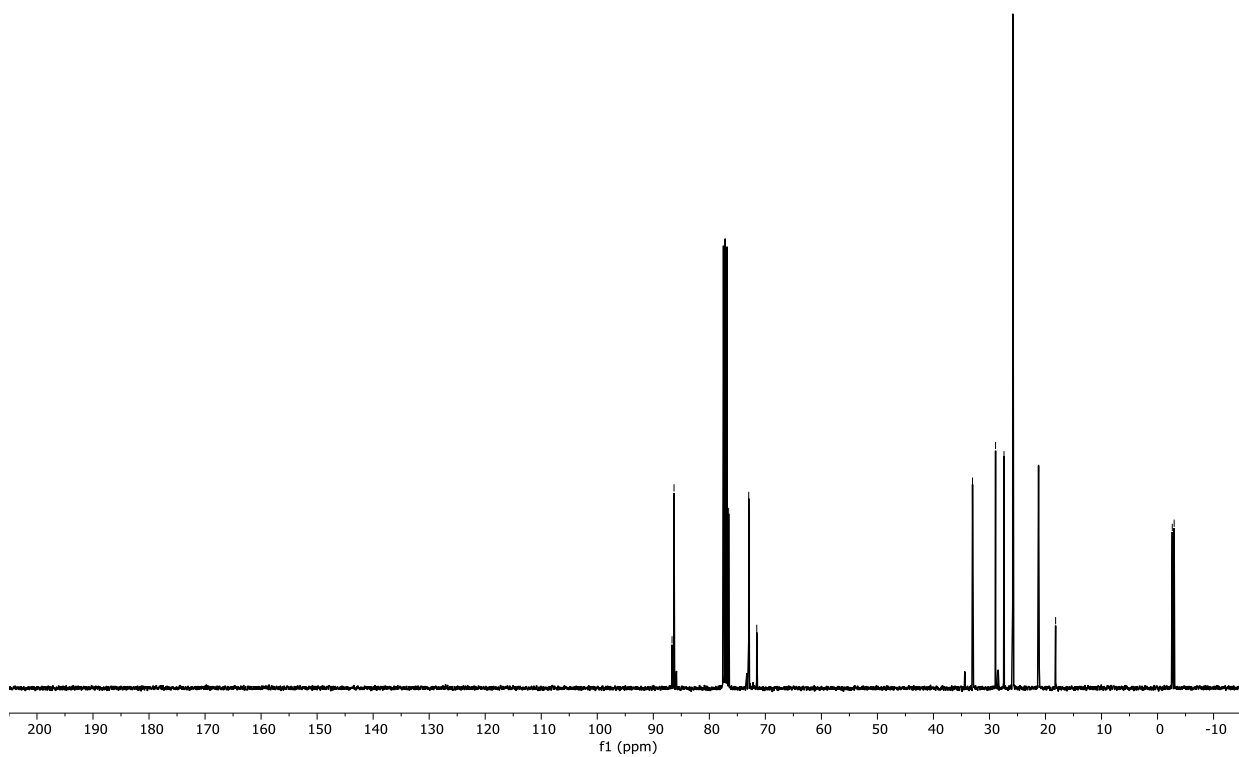



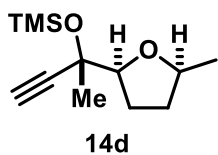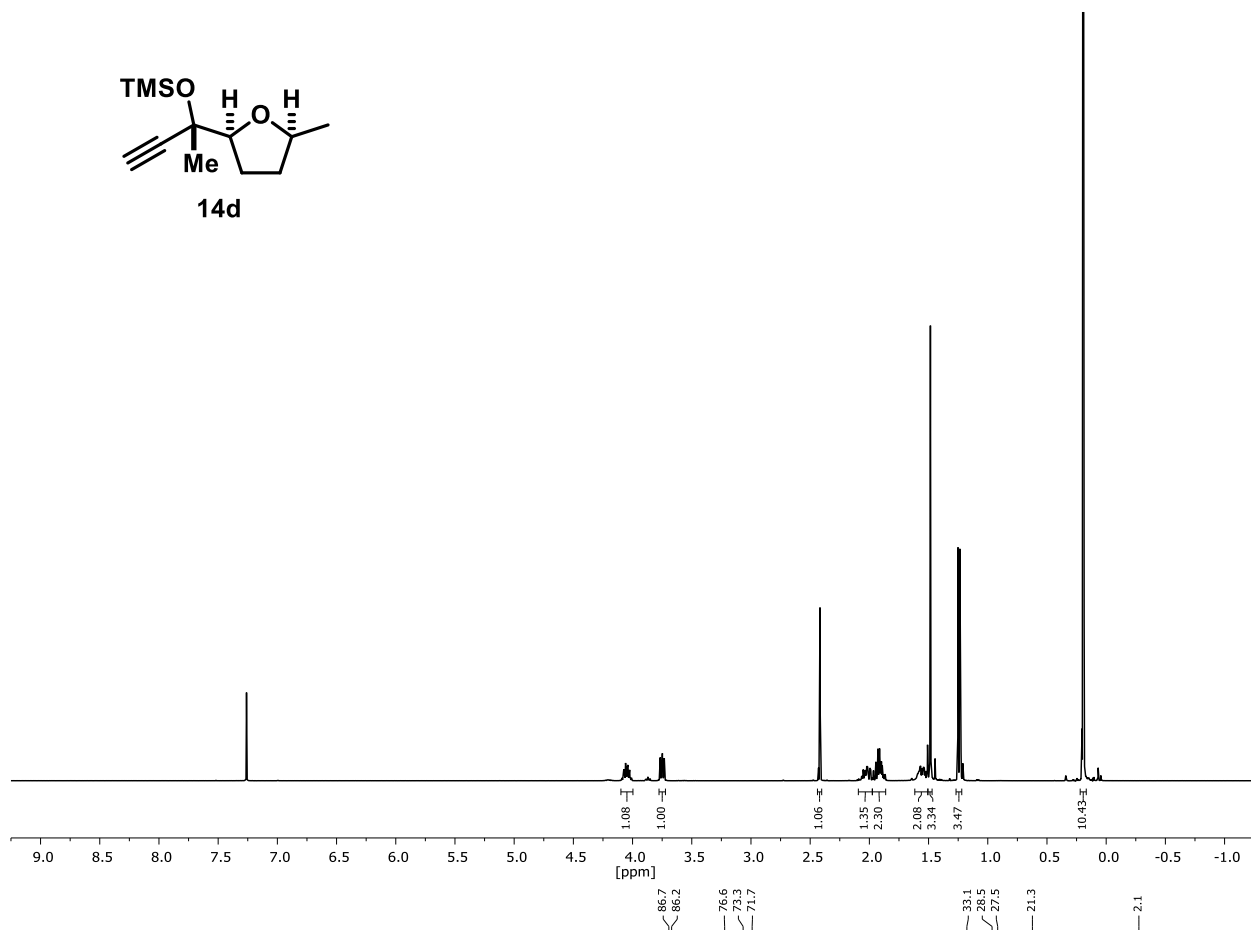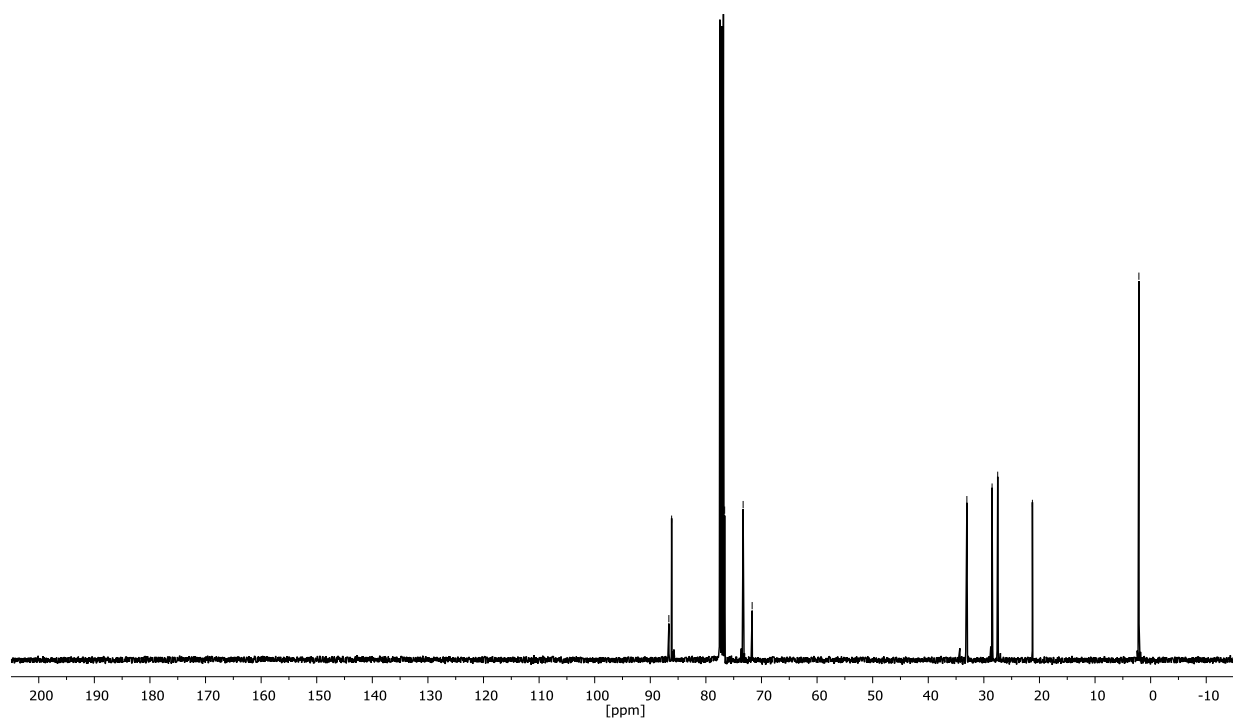

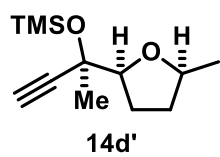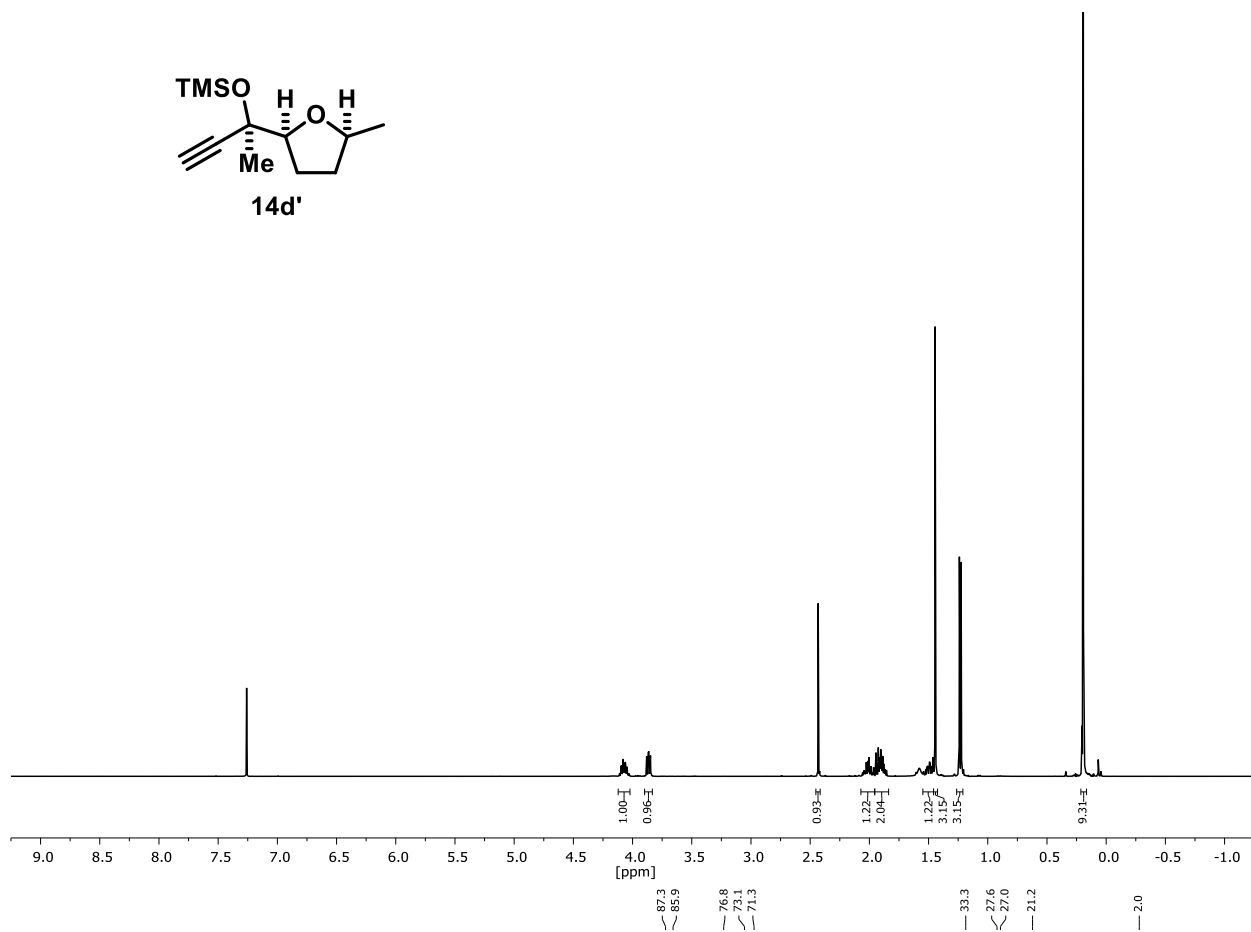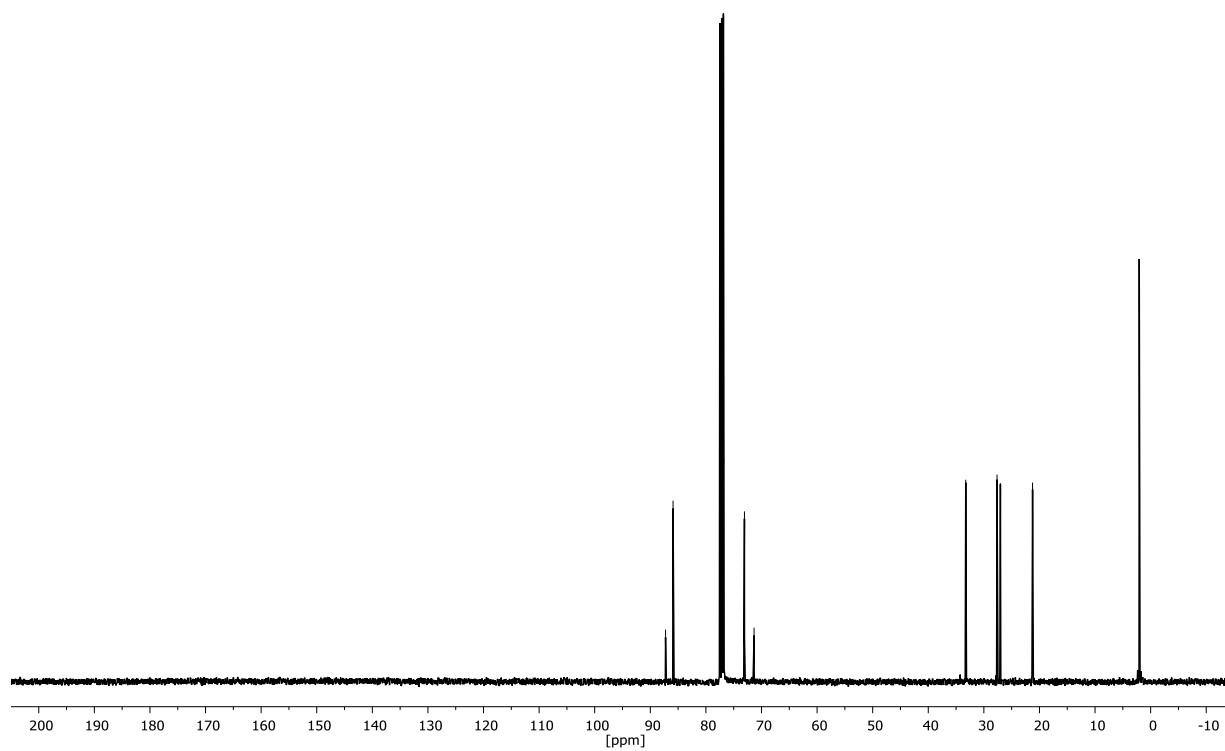

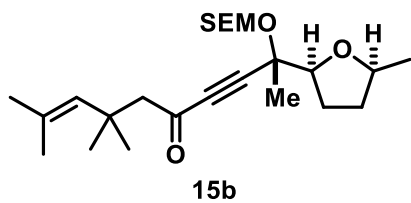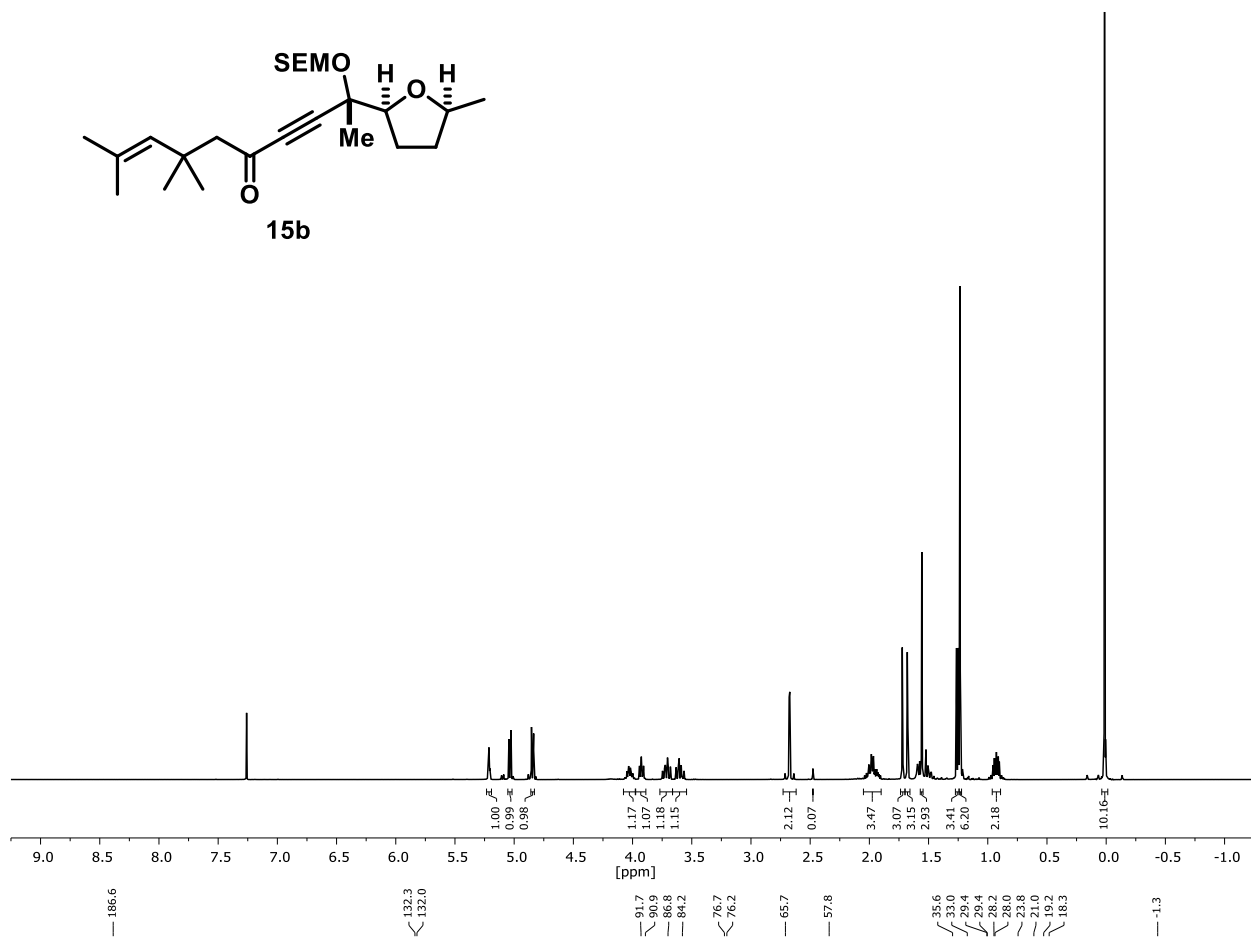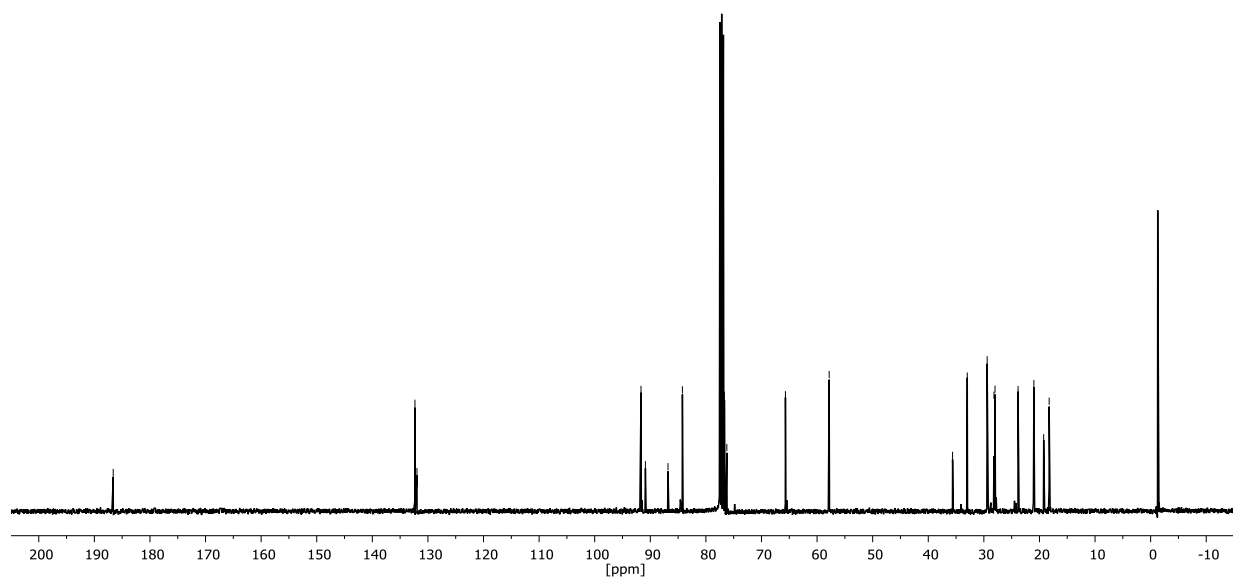

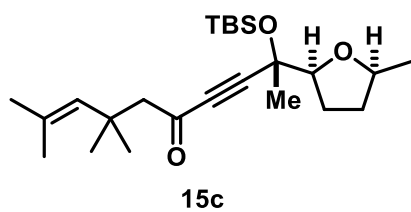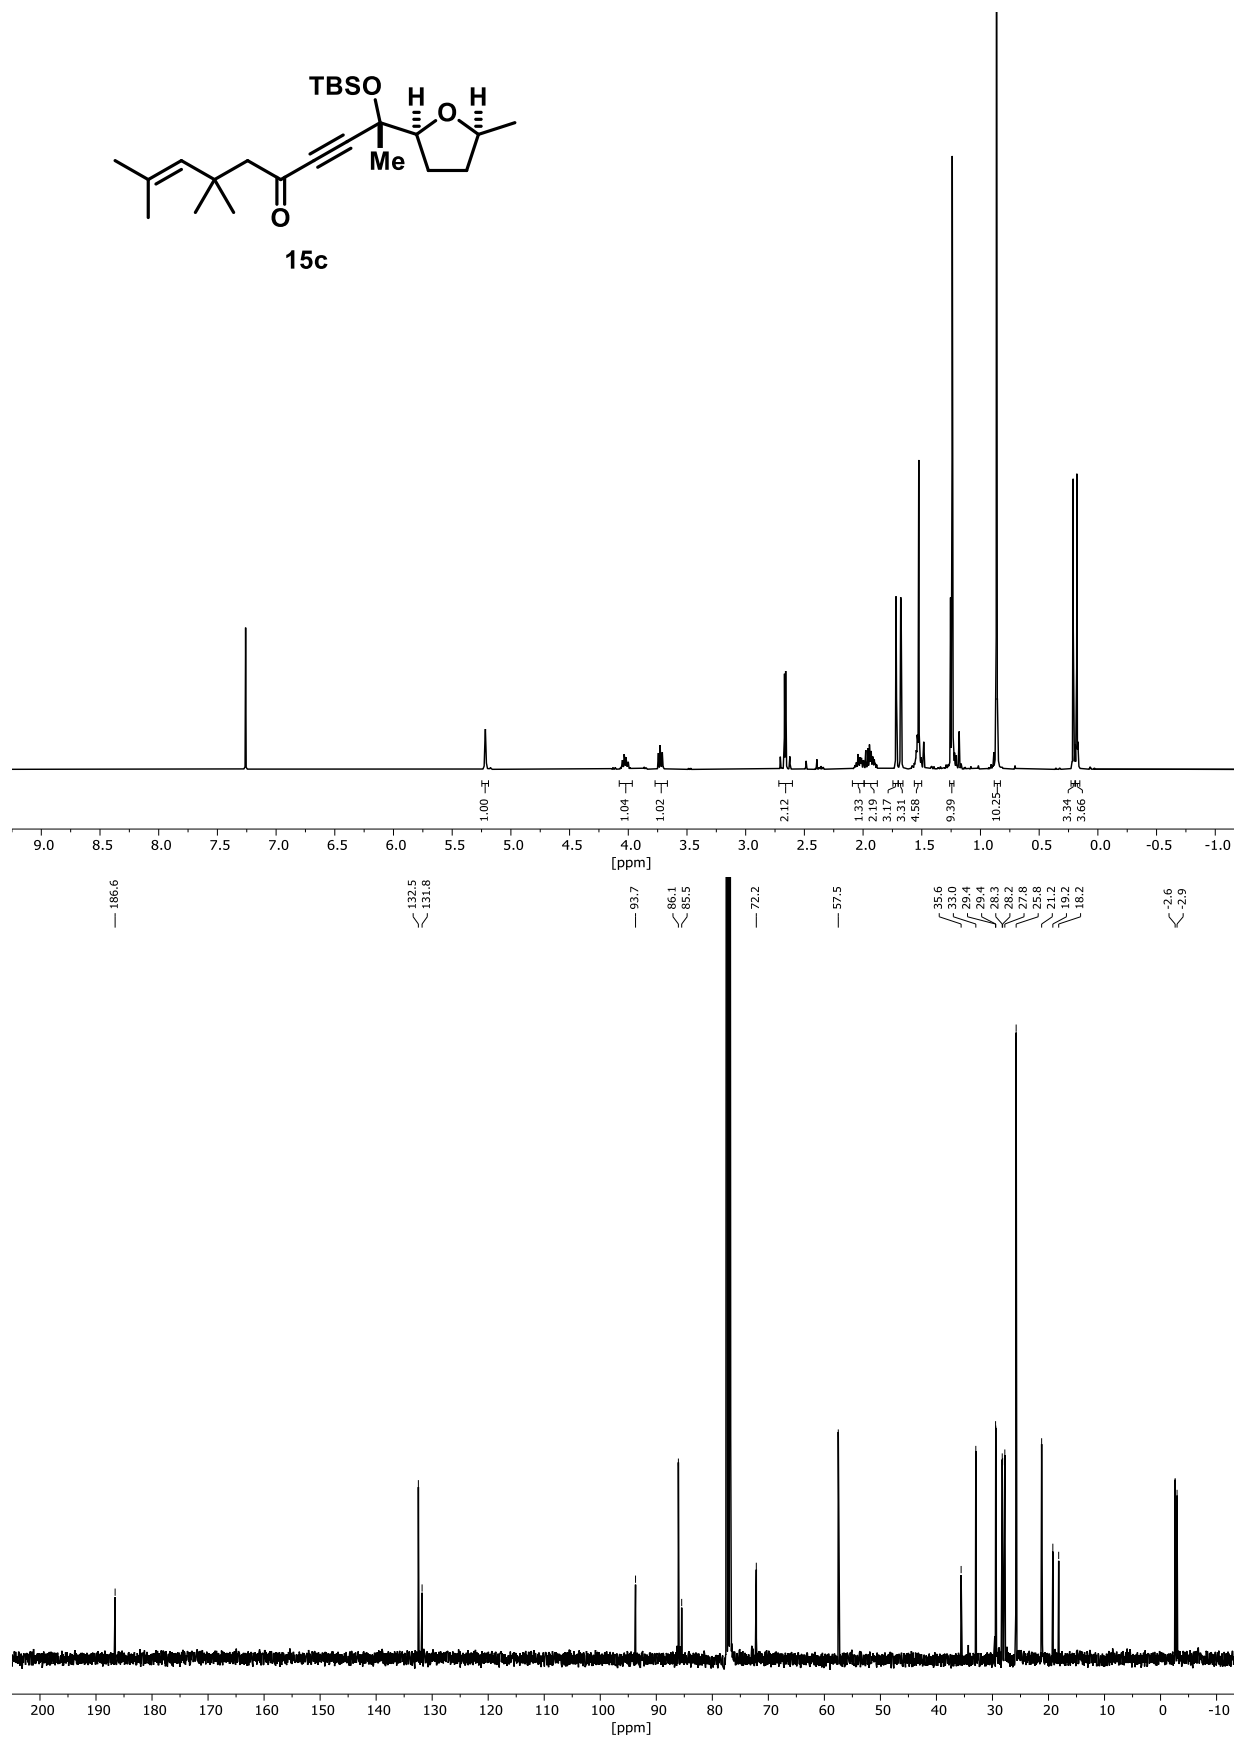

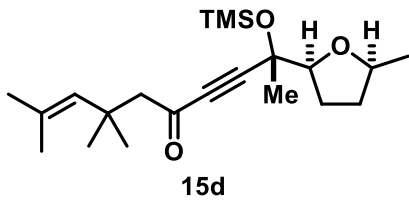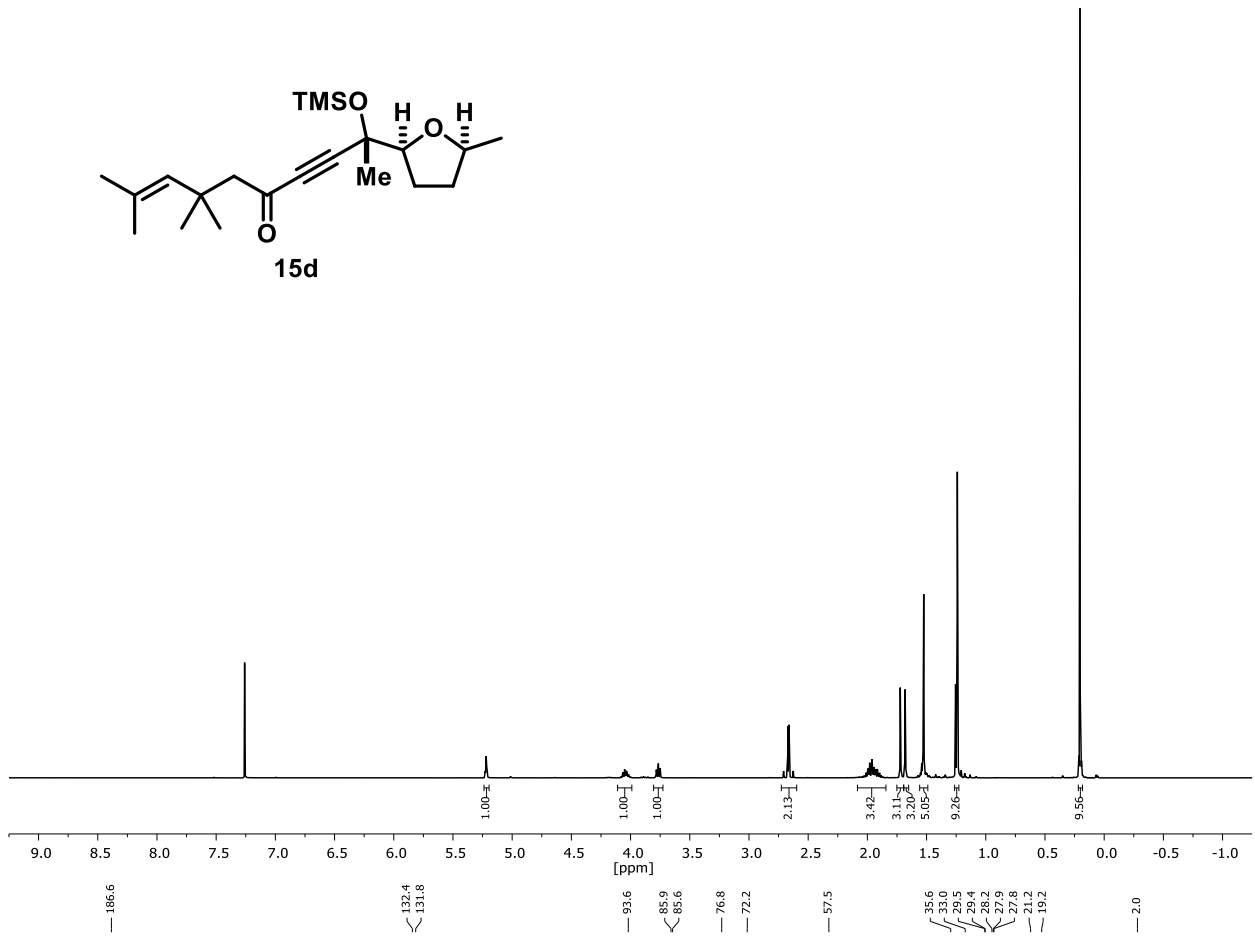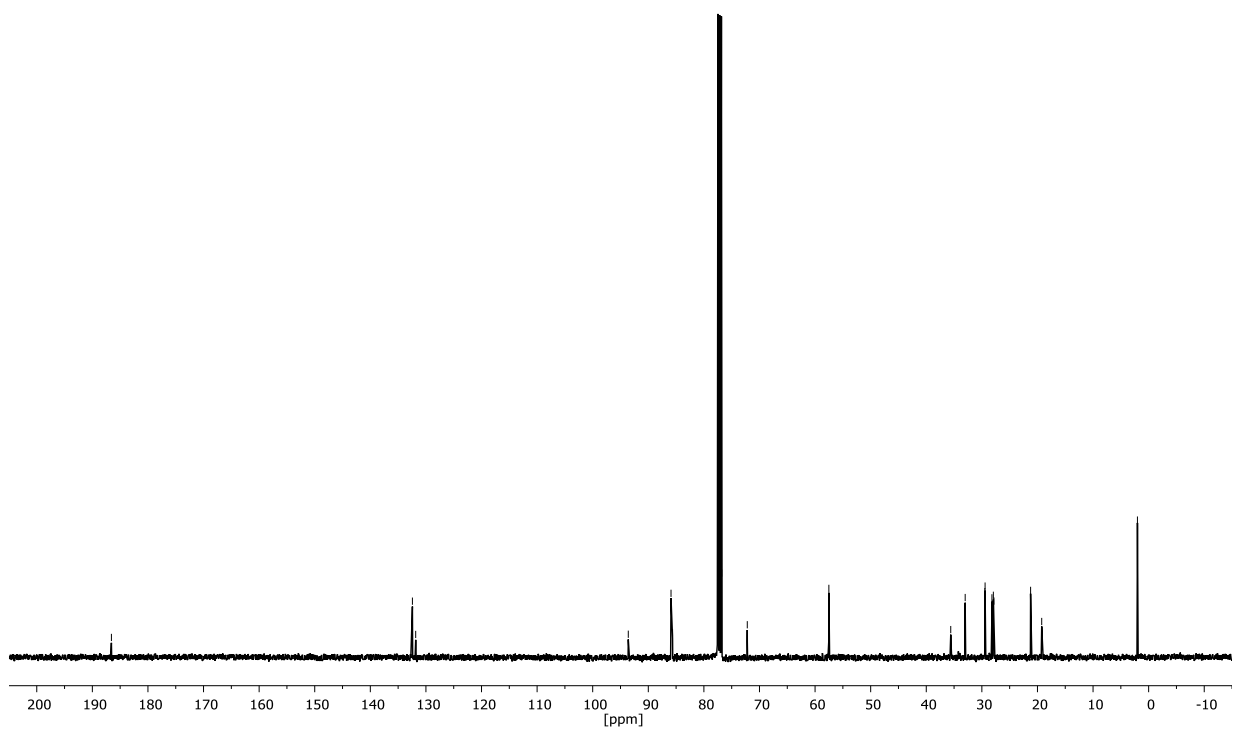

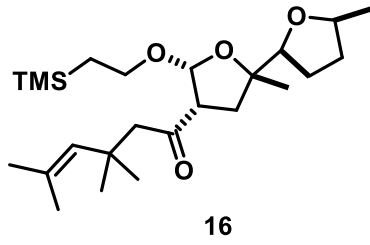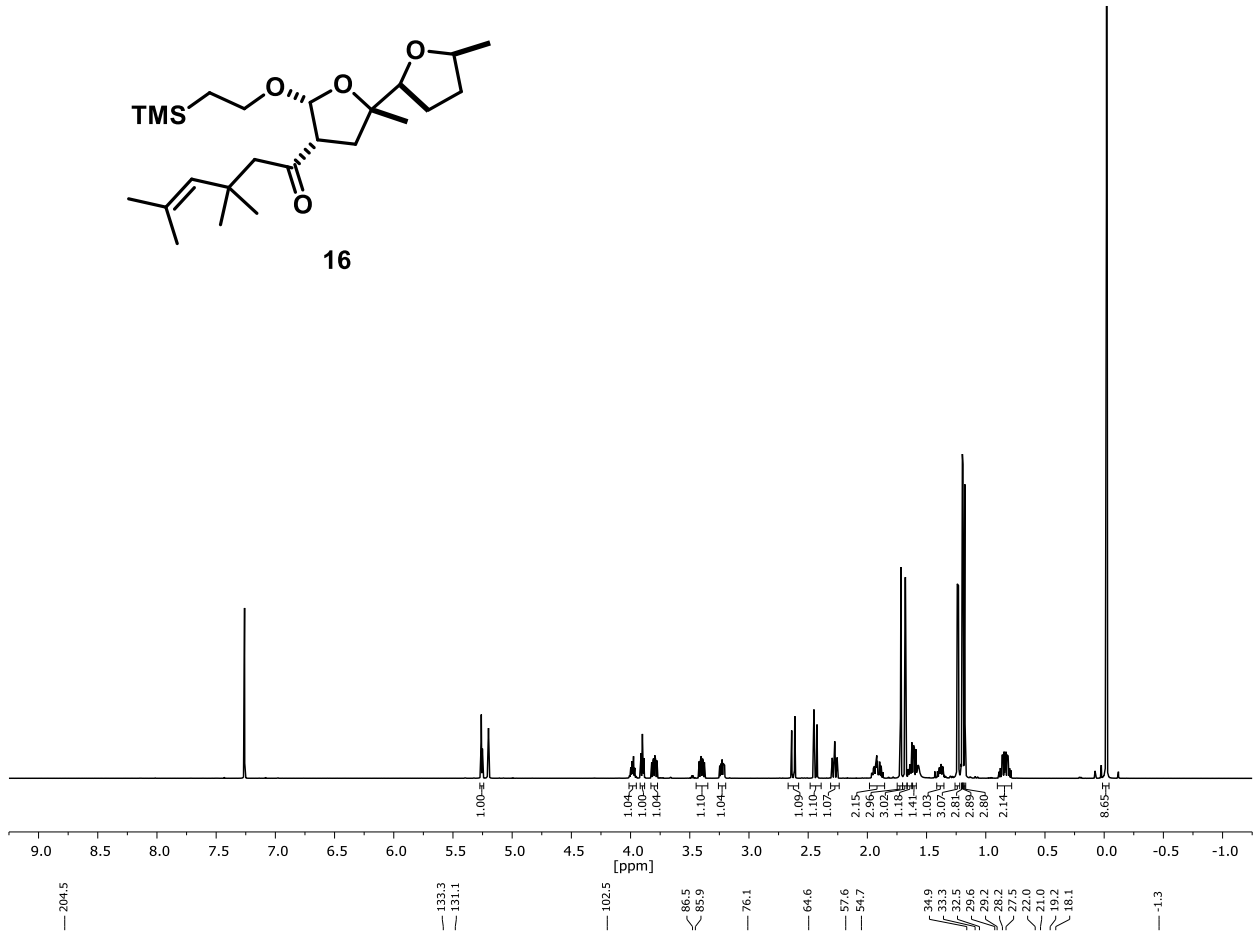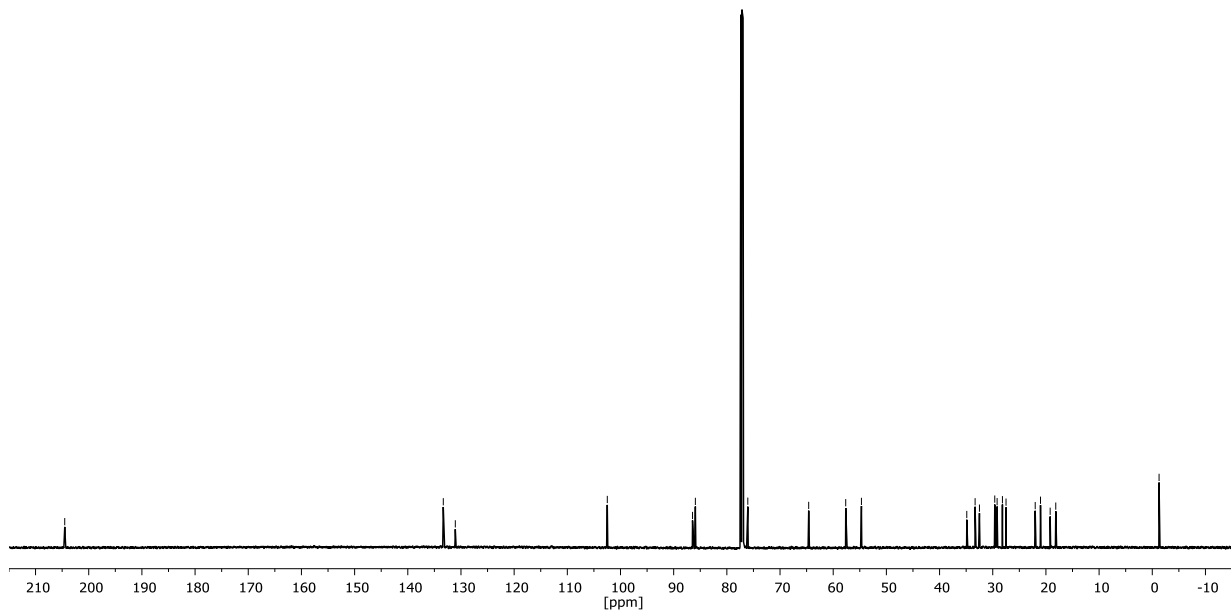



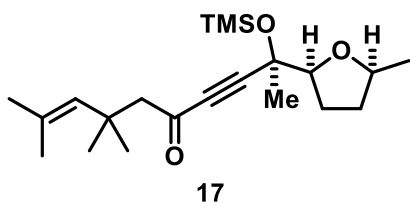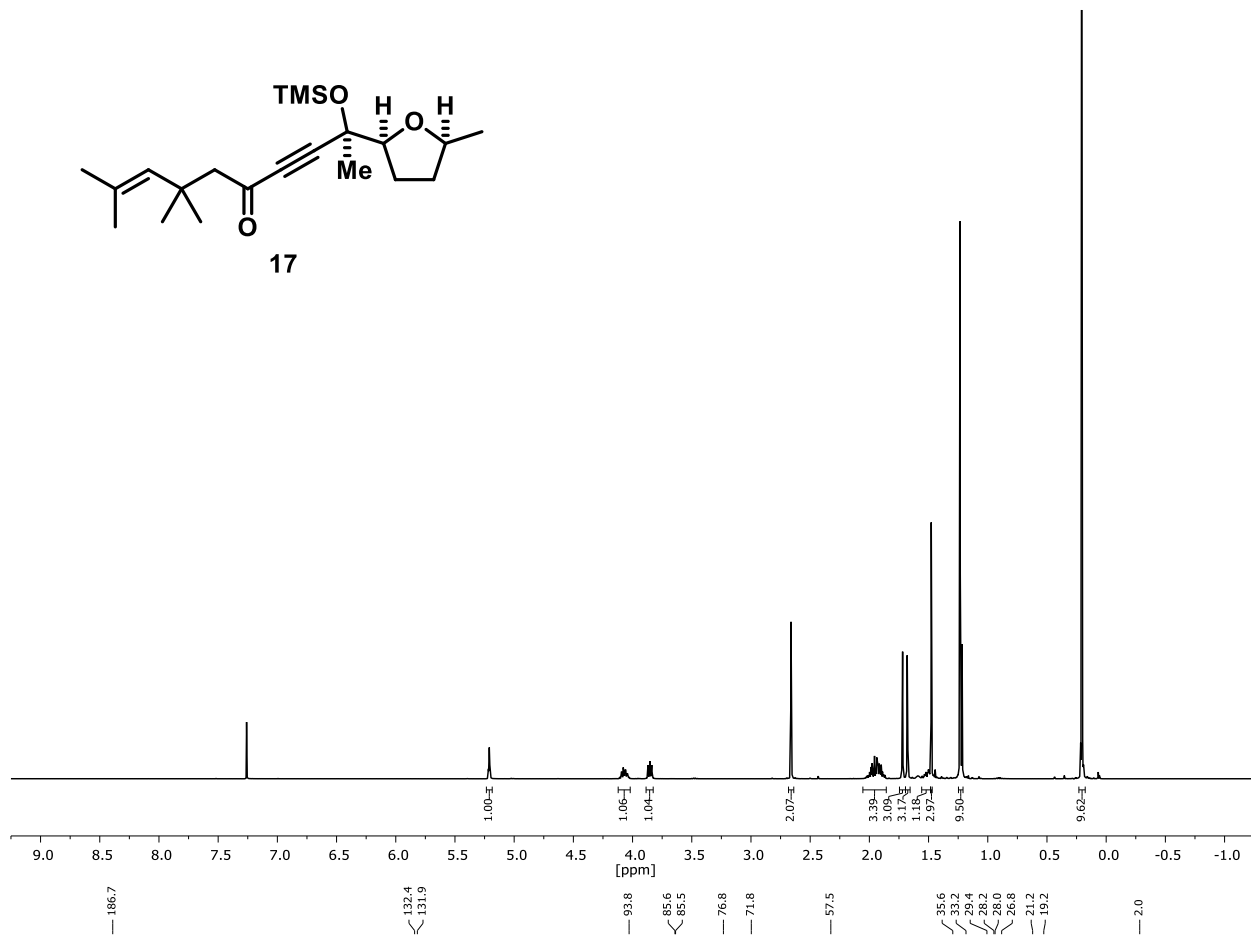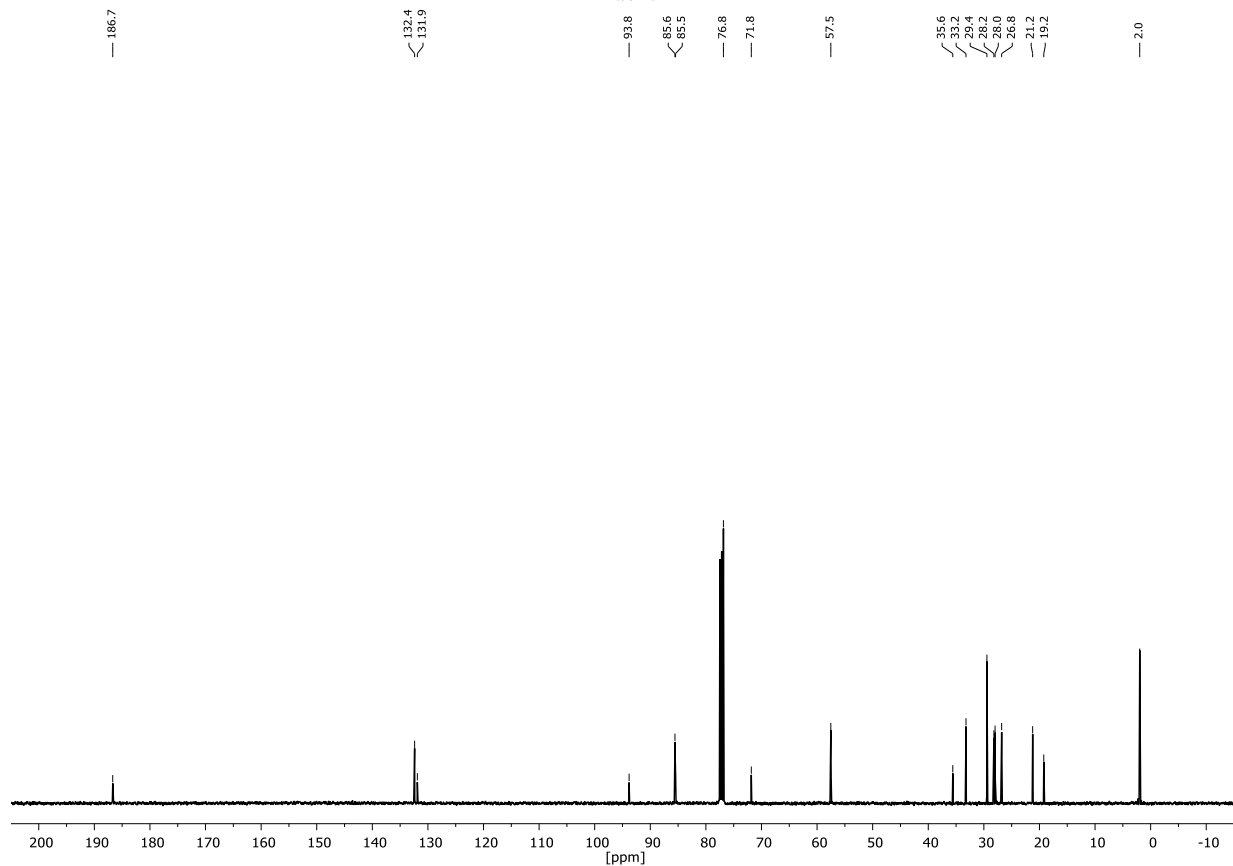



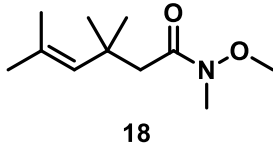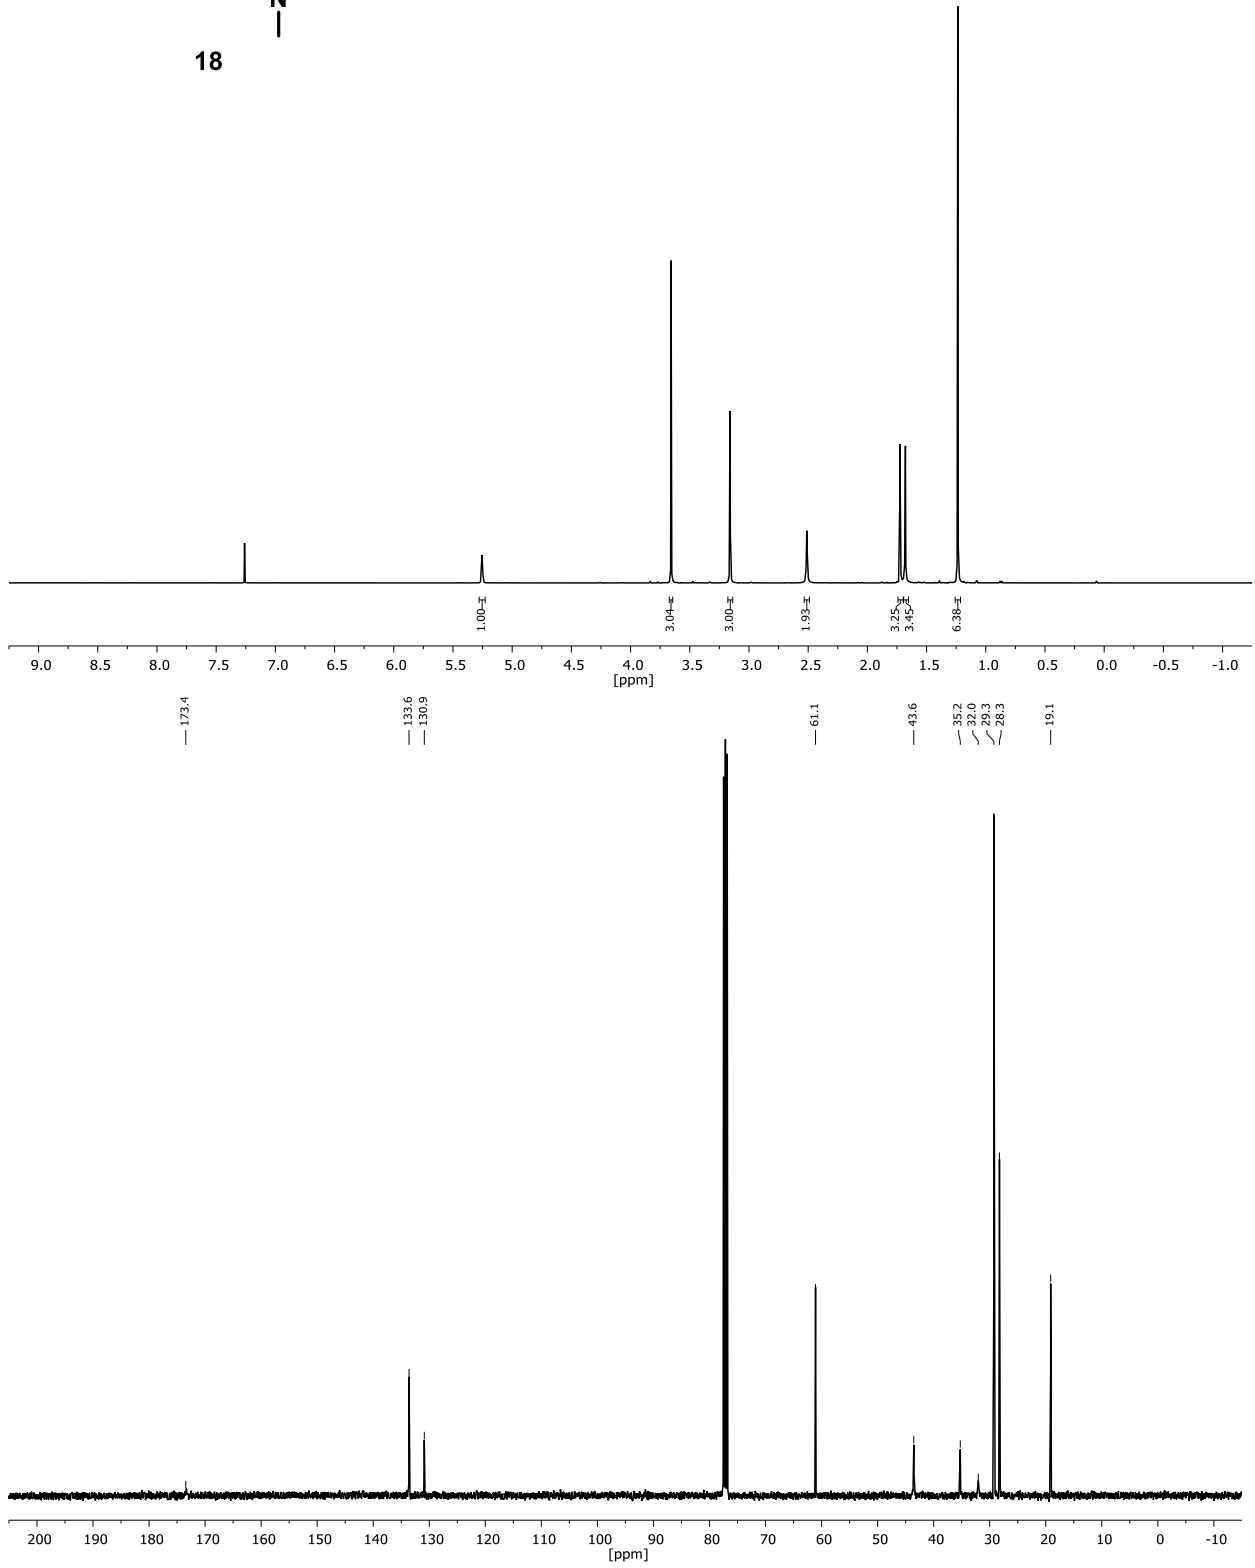

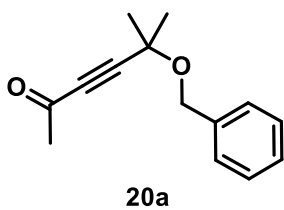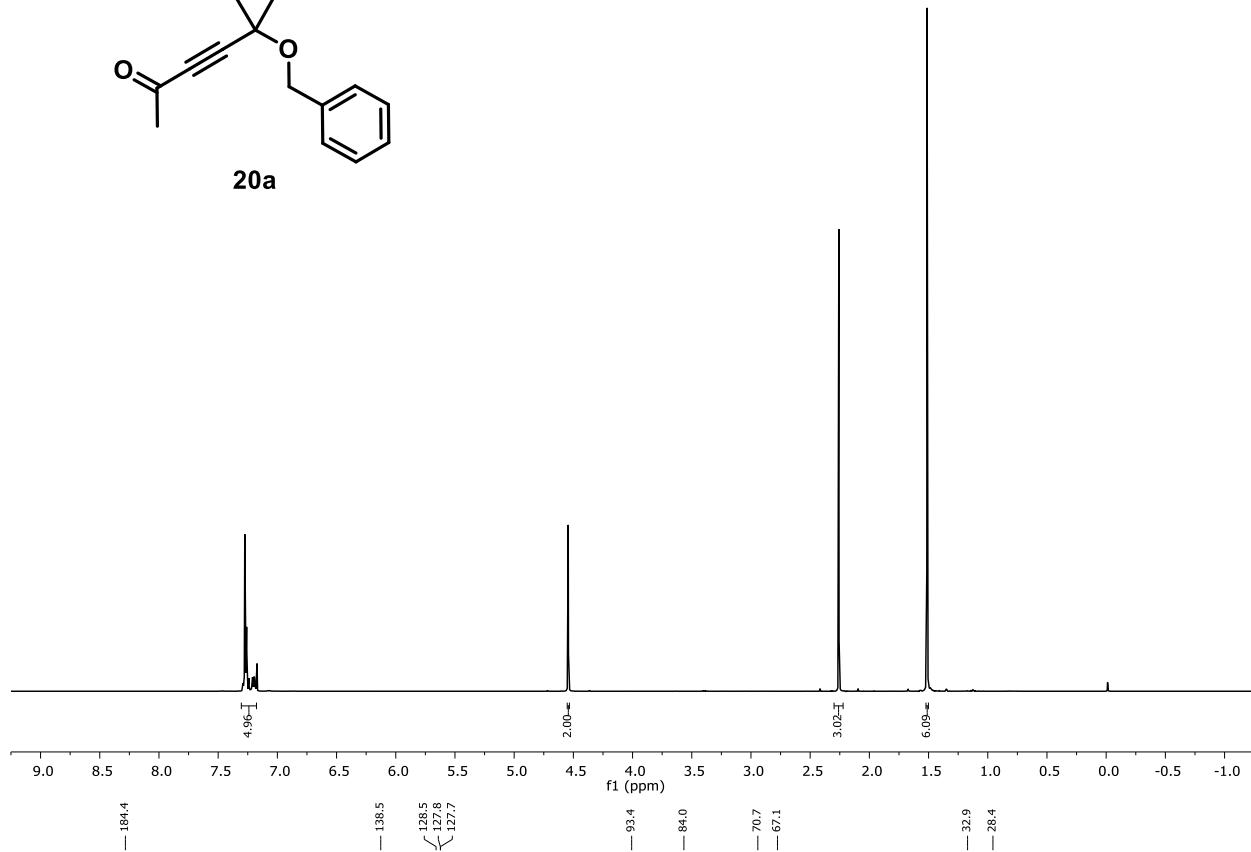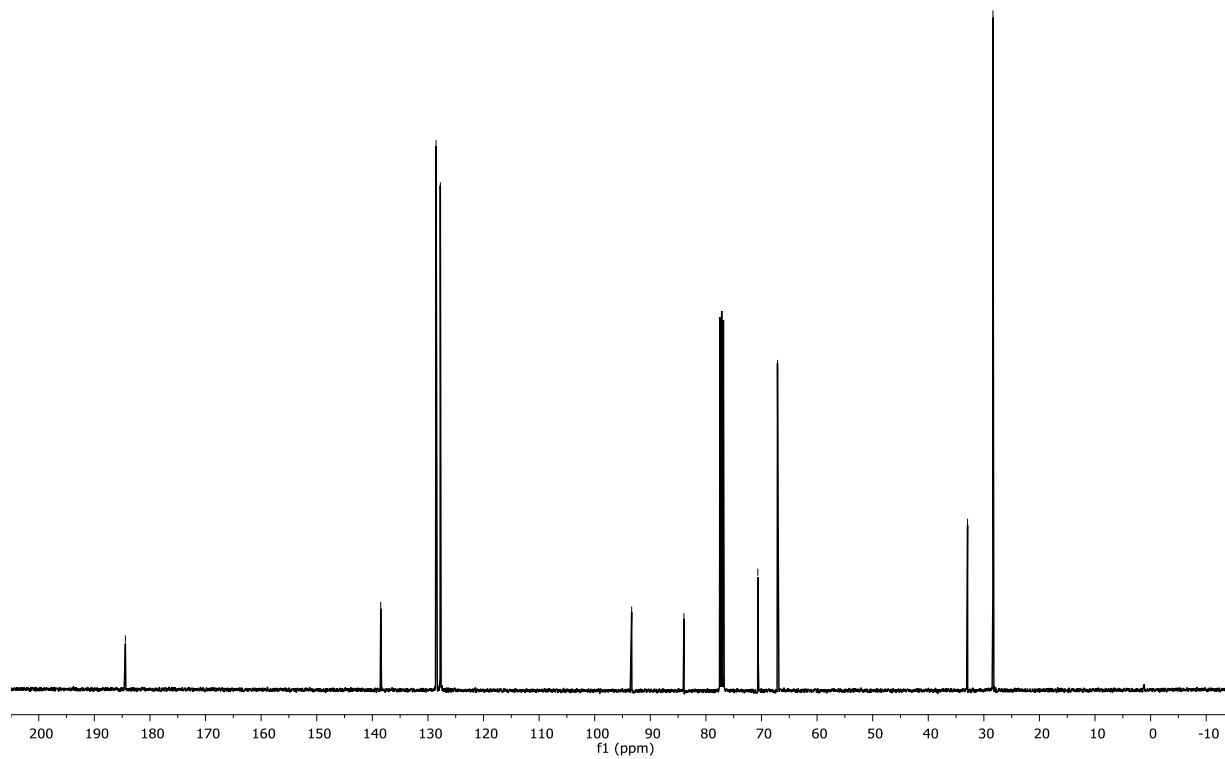

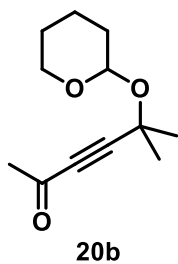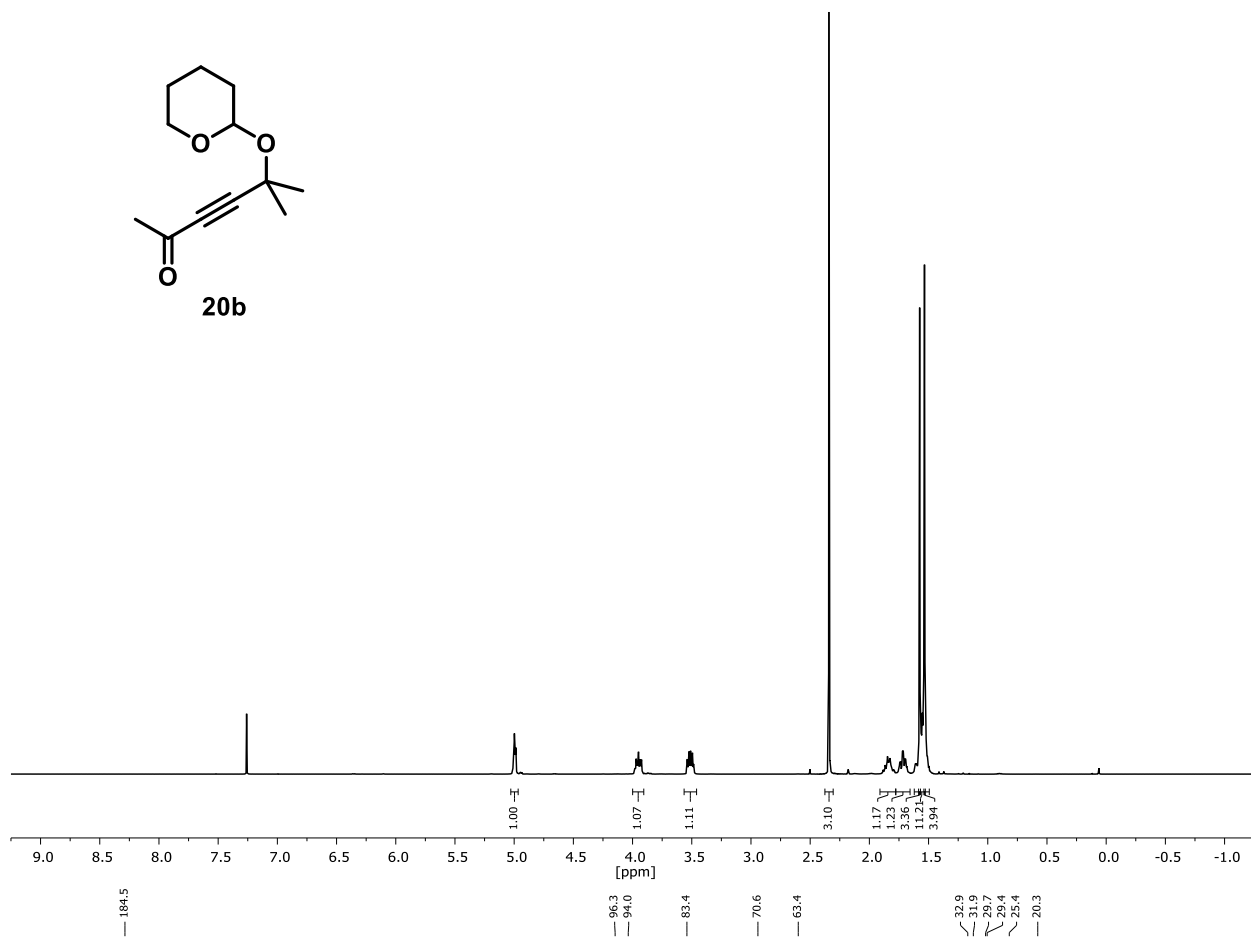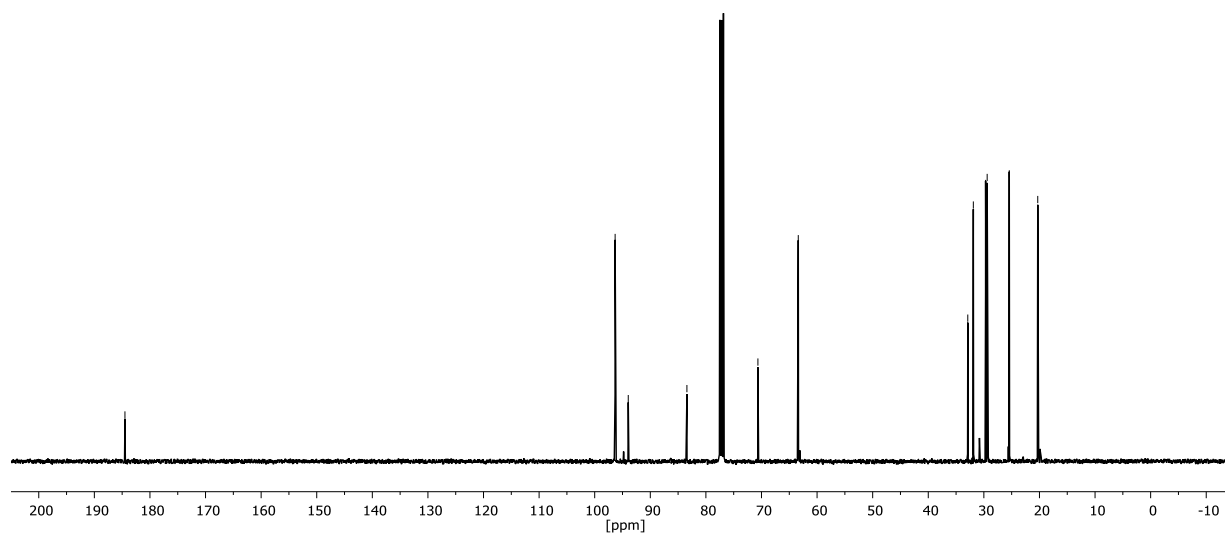

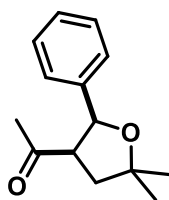

21

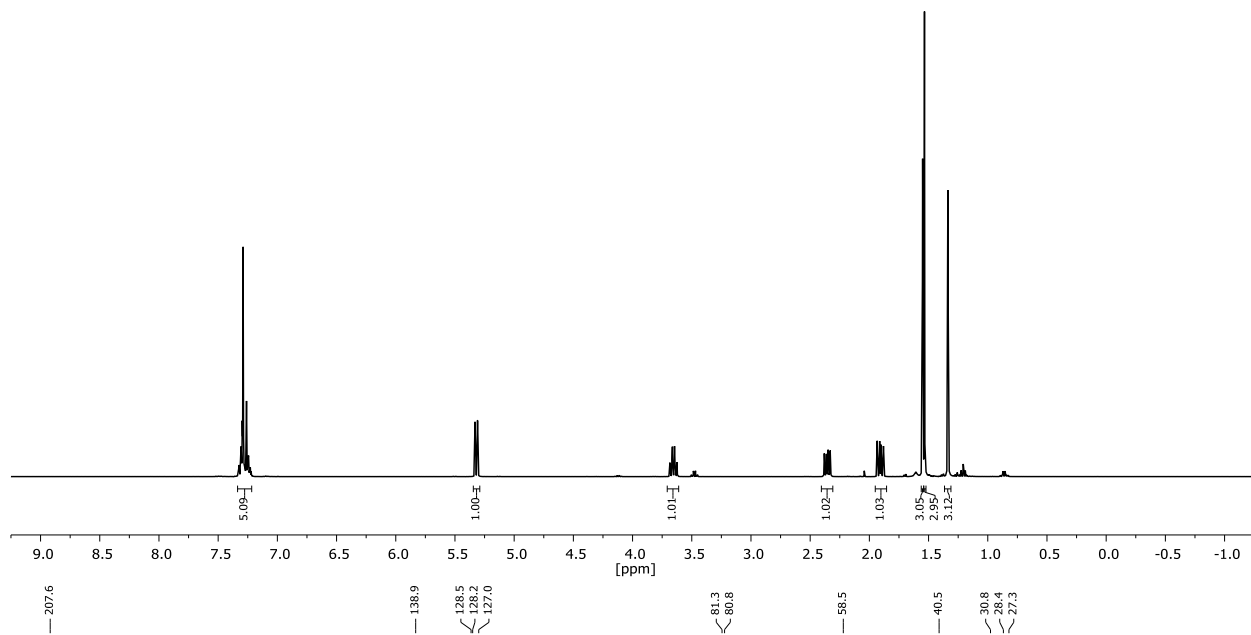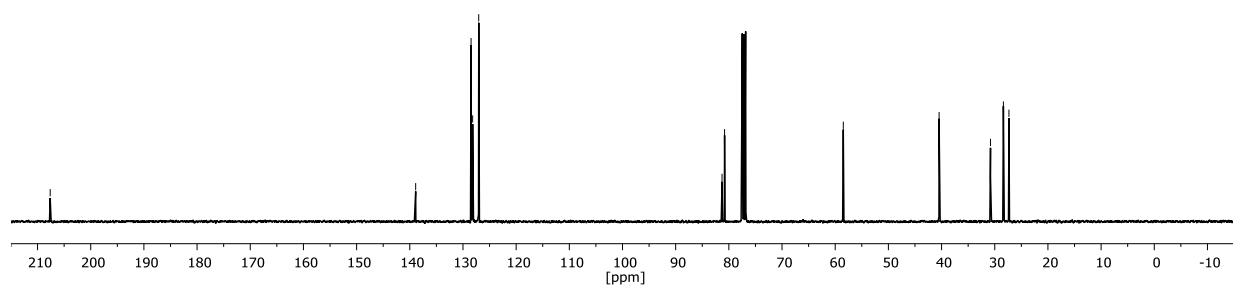

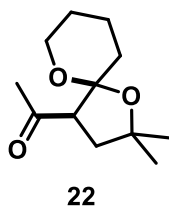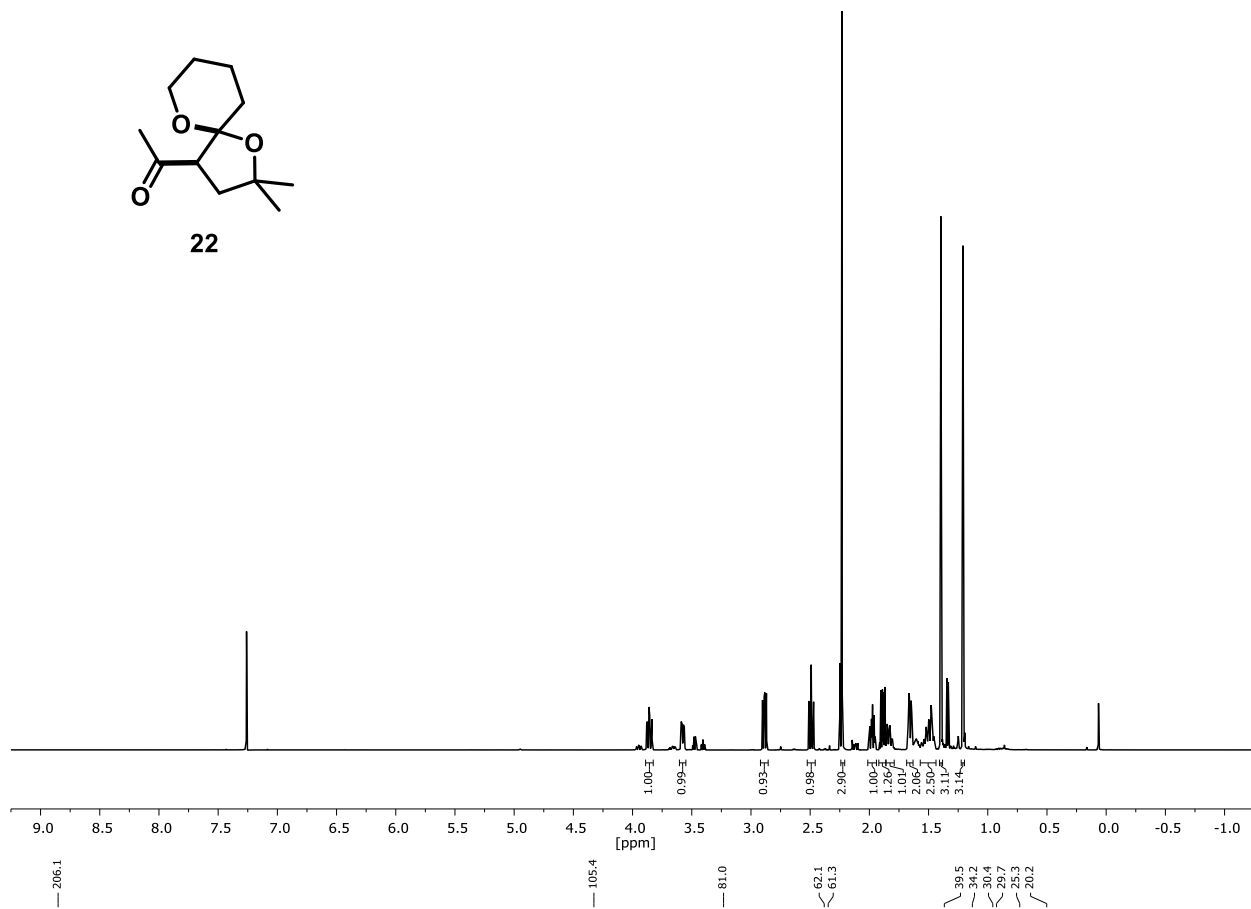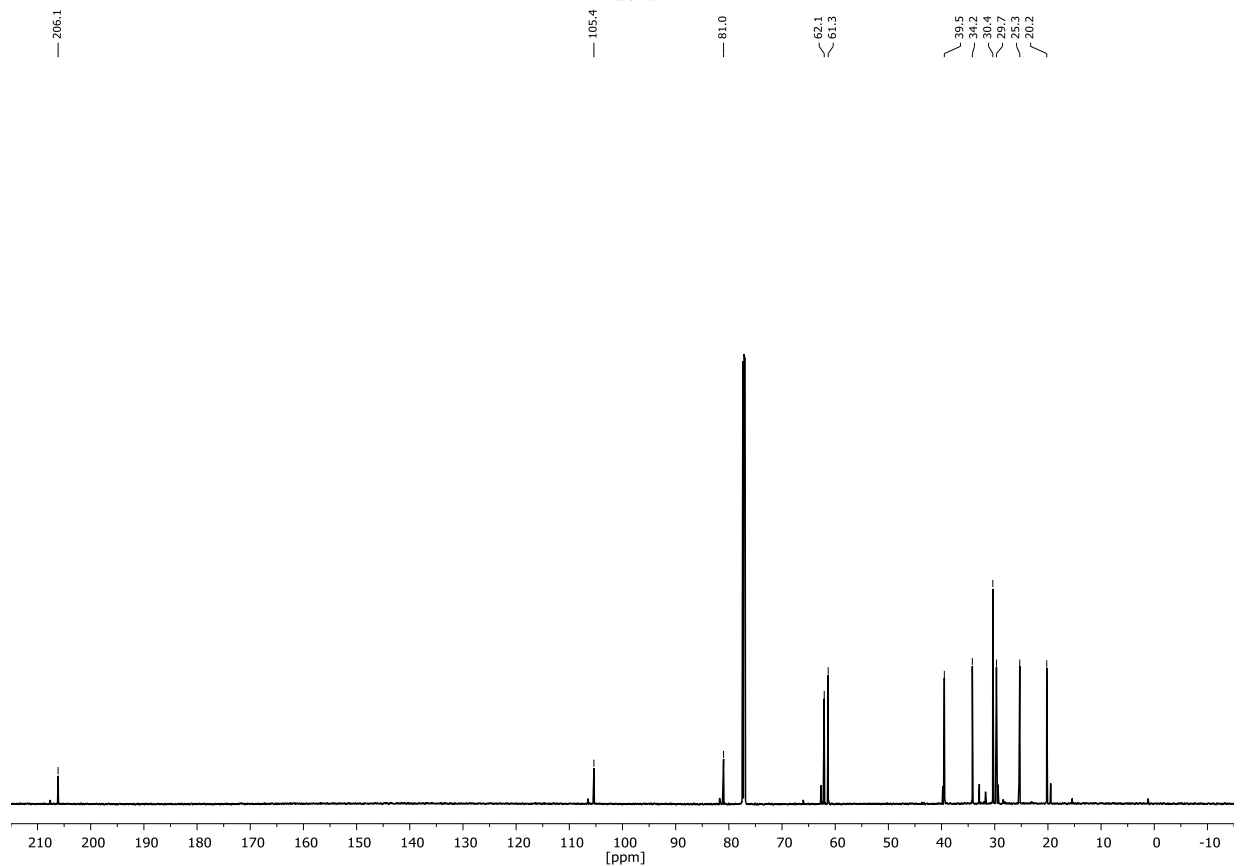

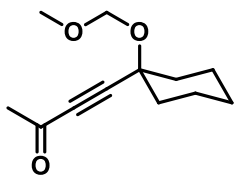

23a

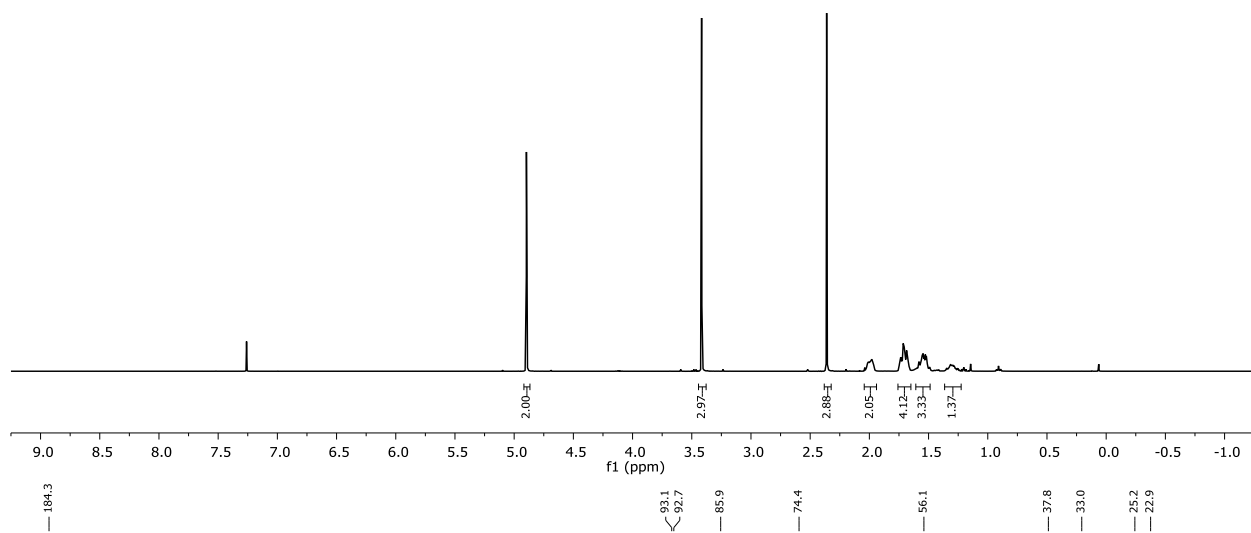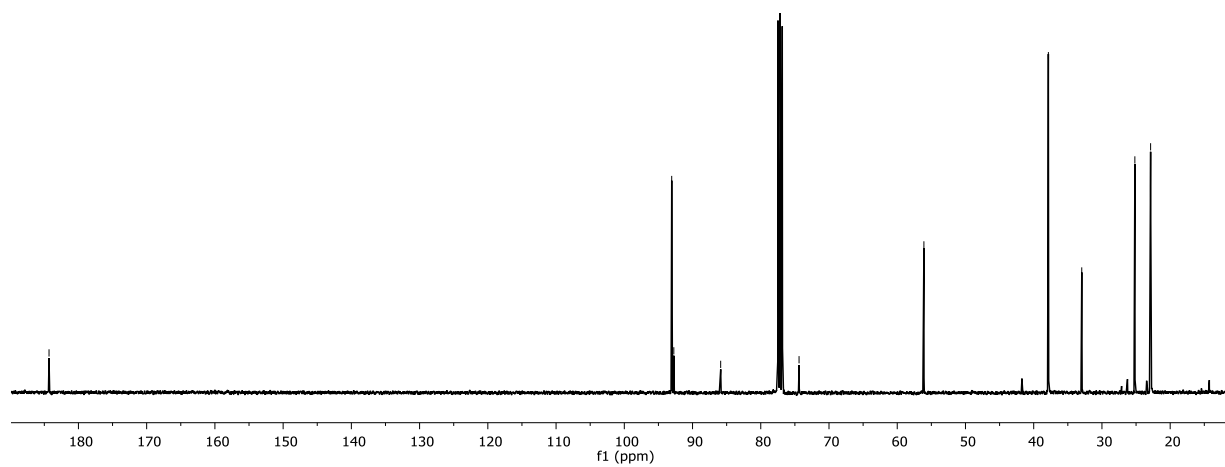

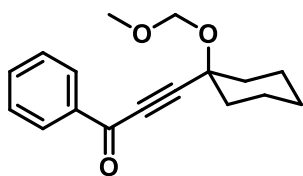

23b

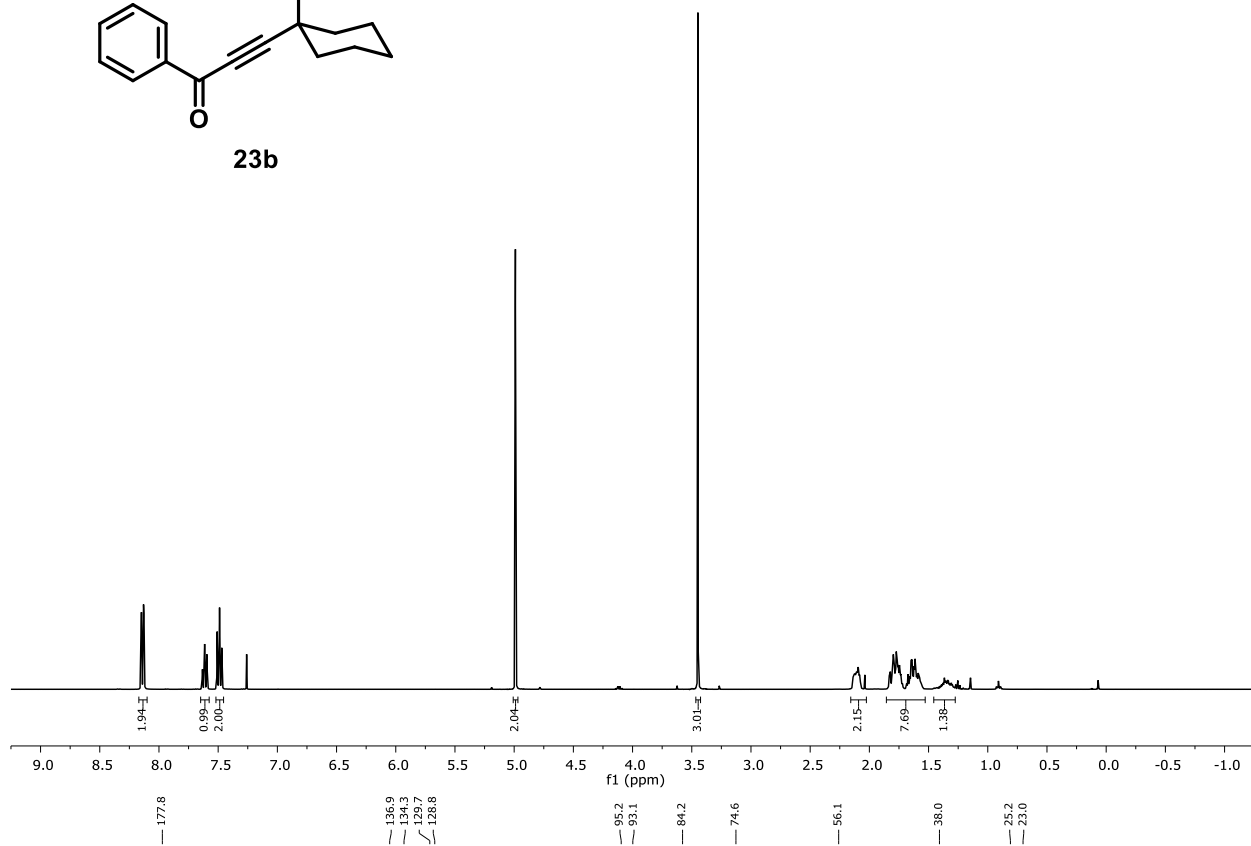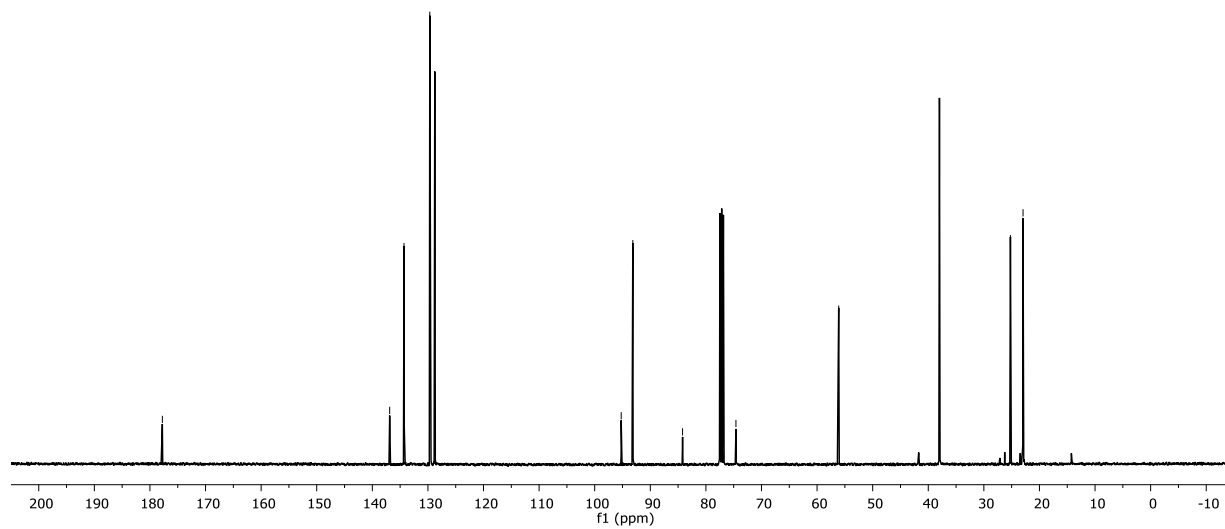

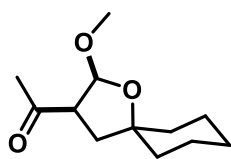

24a

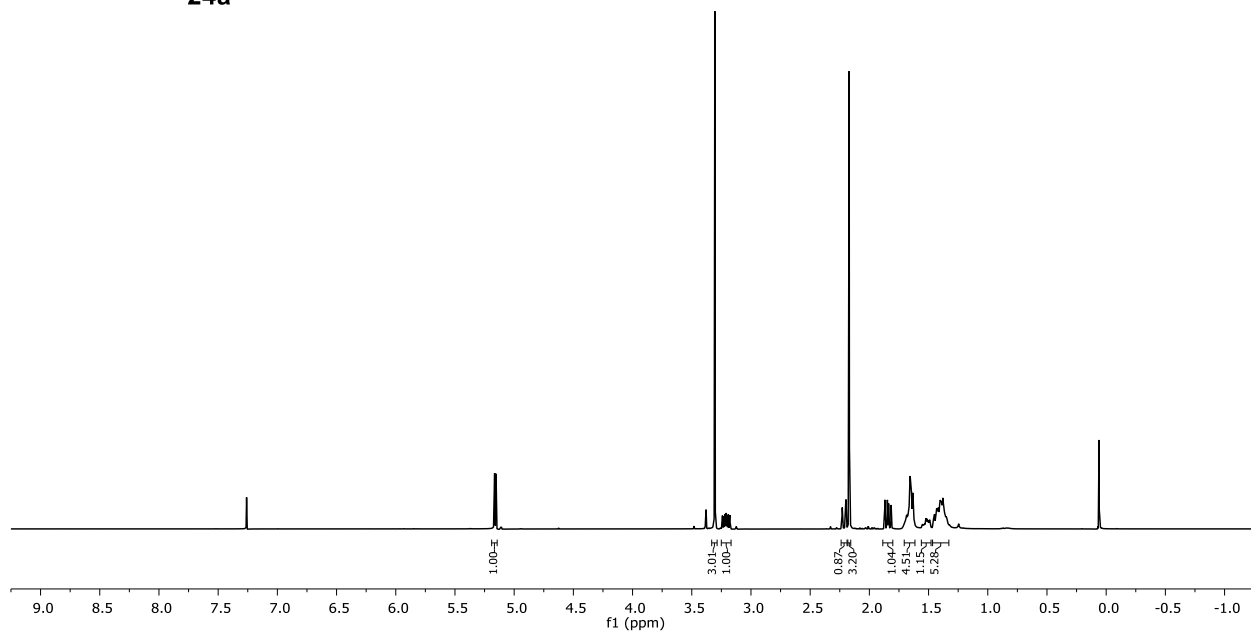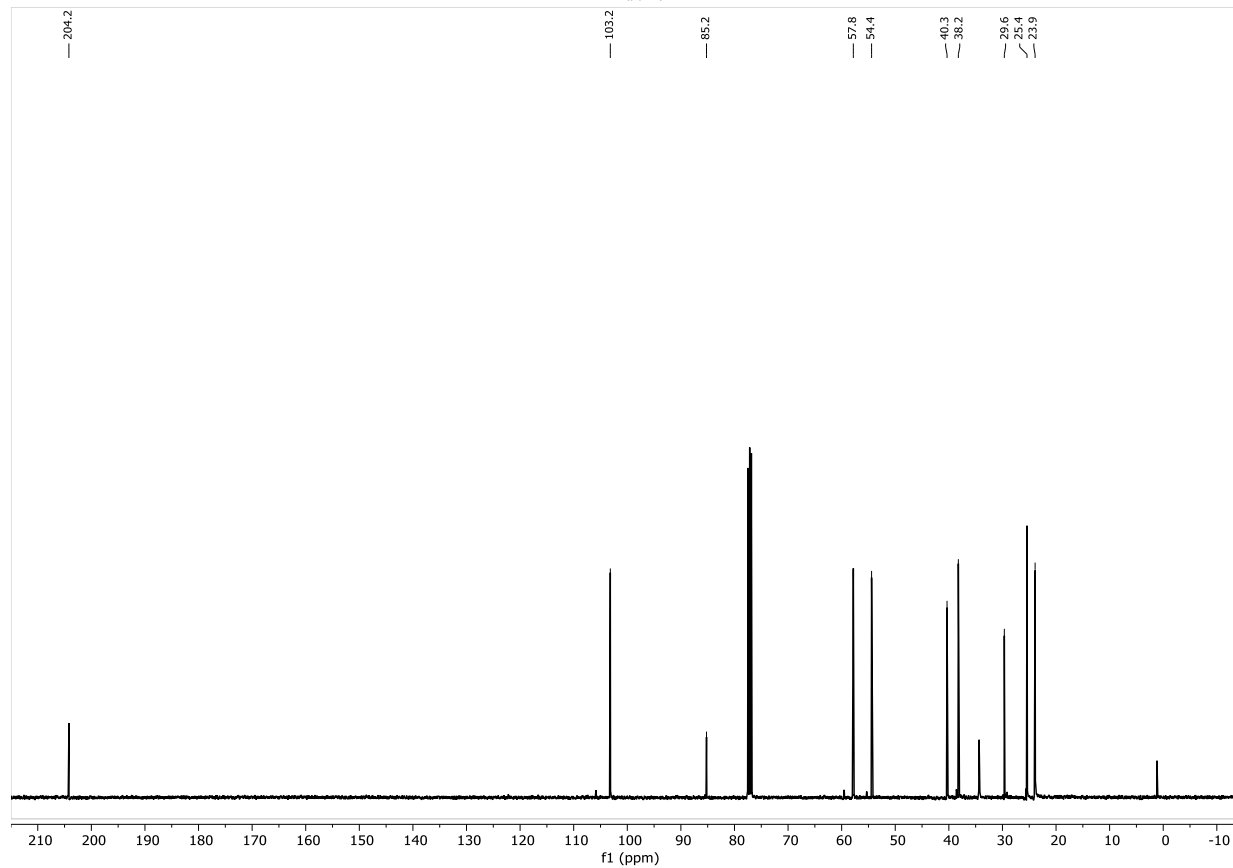



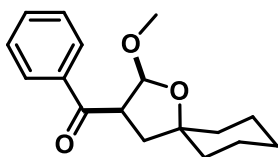

24b

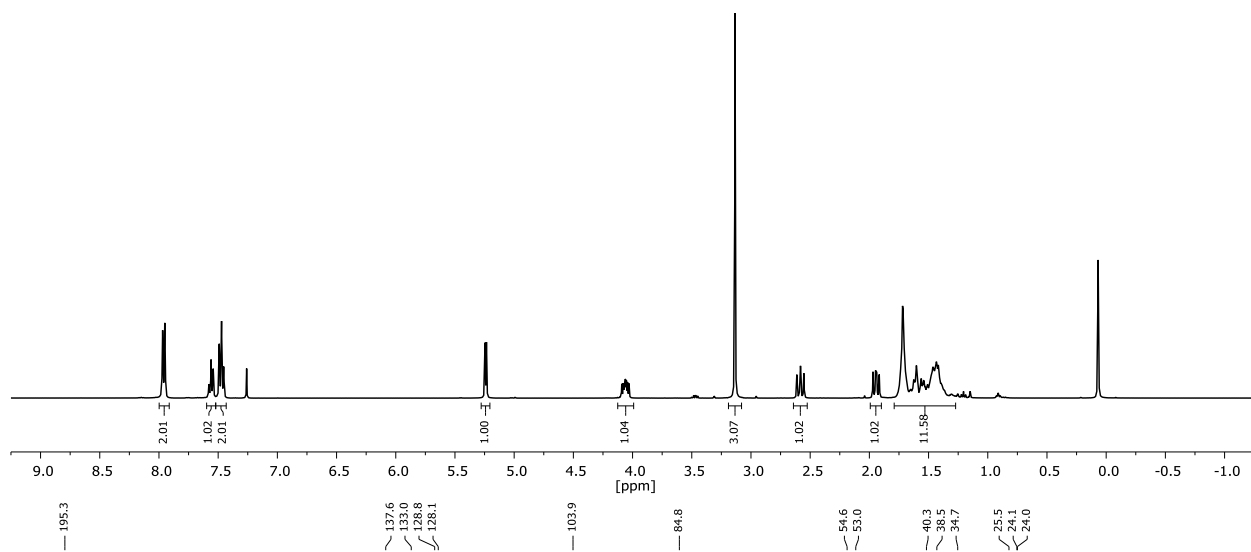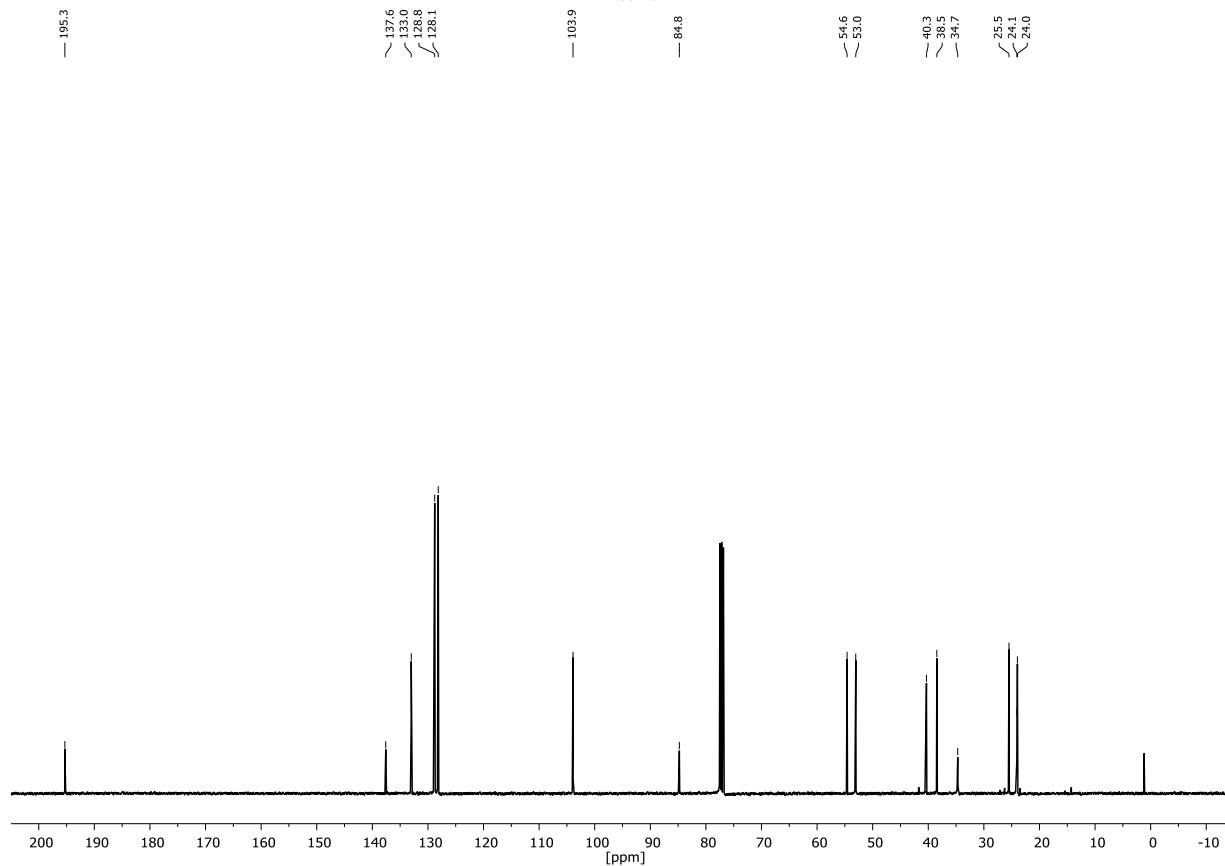

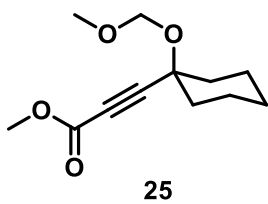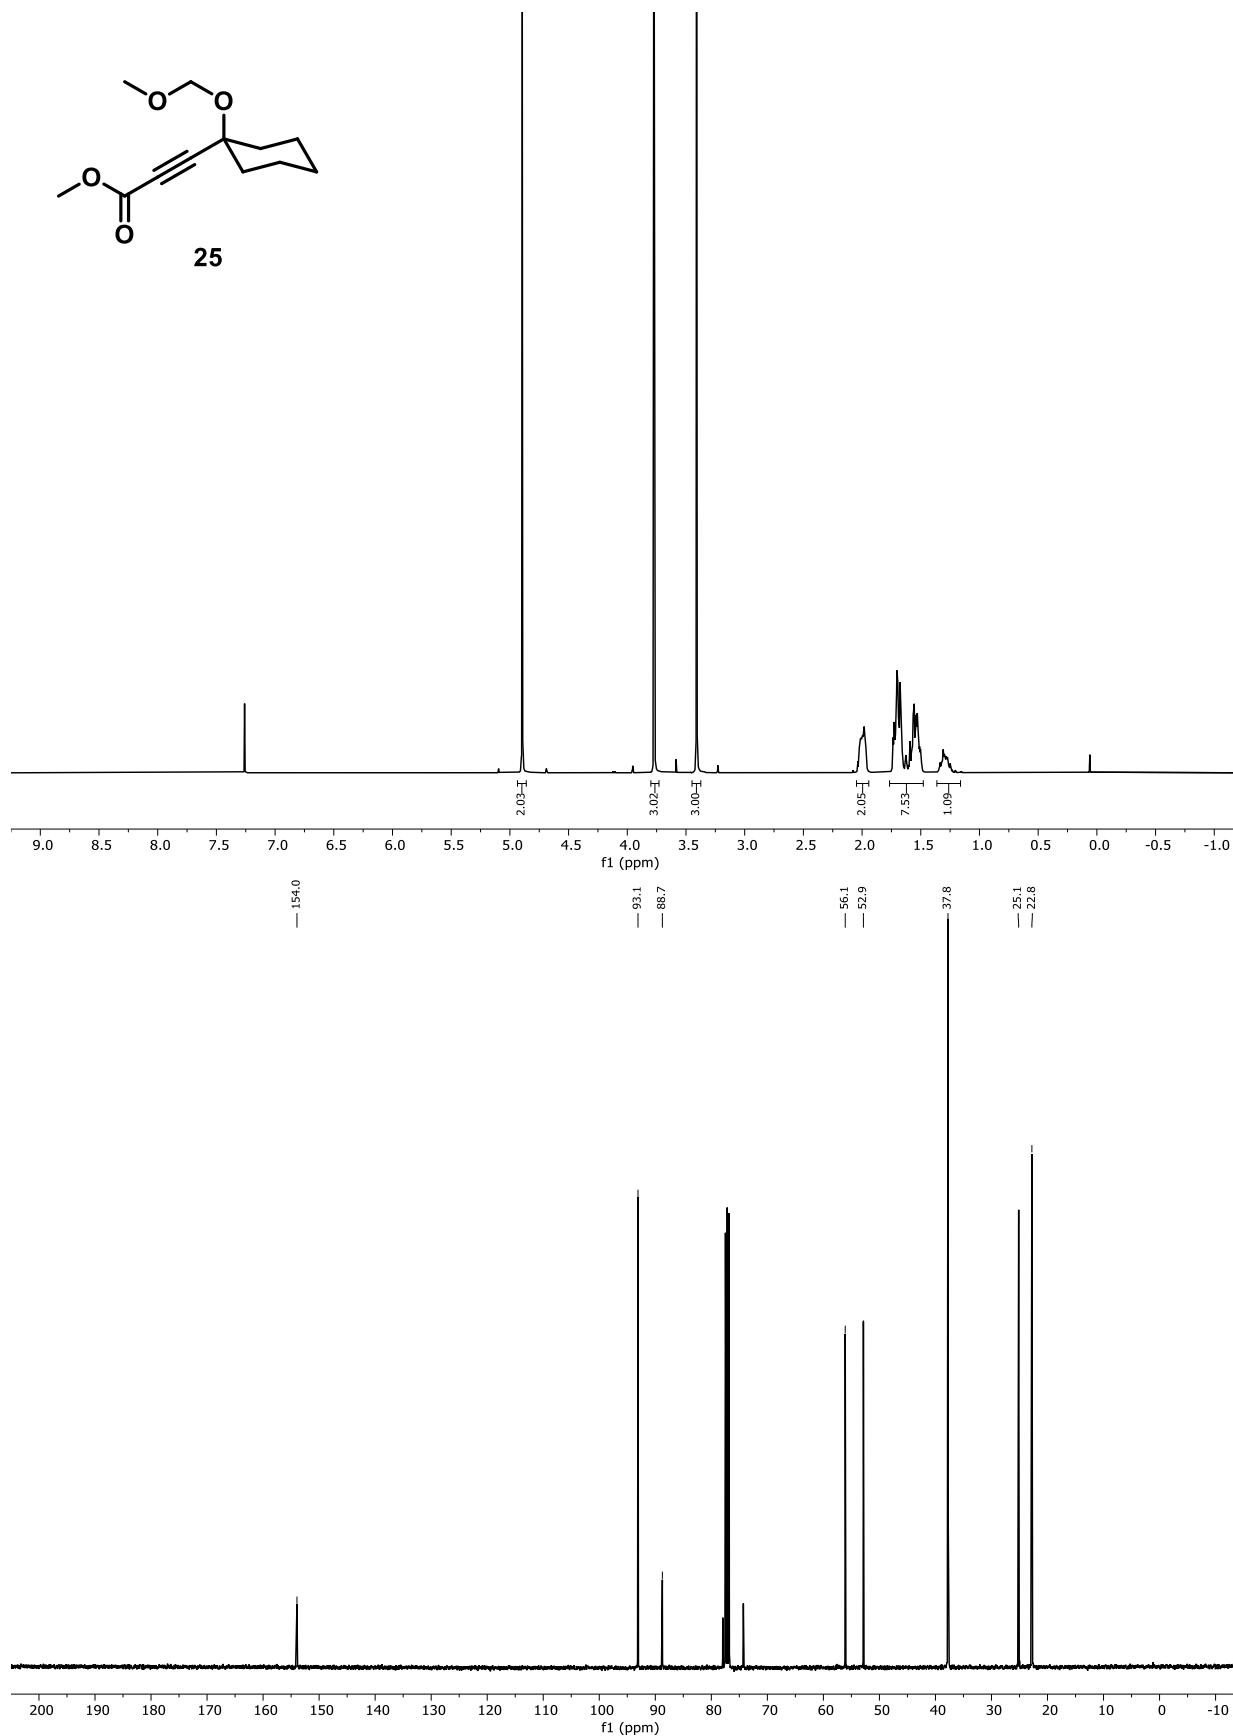

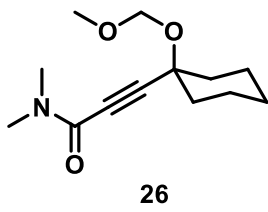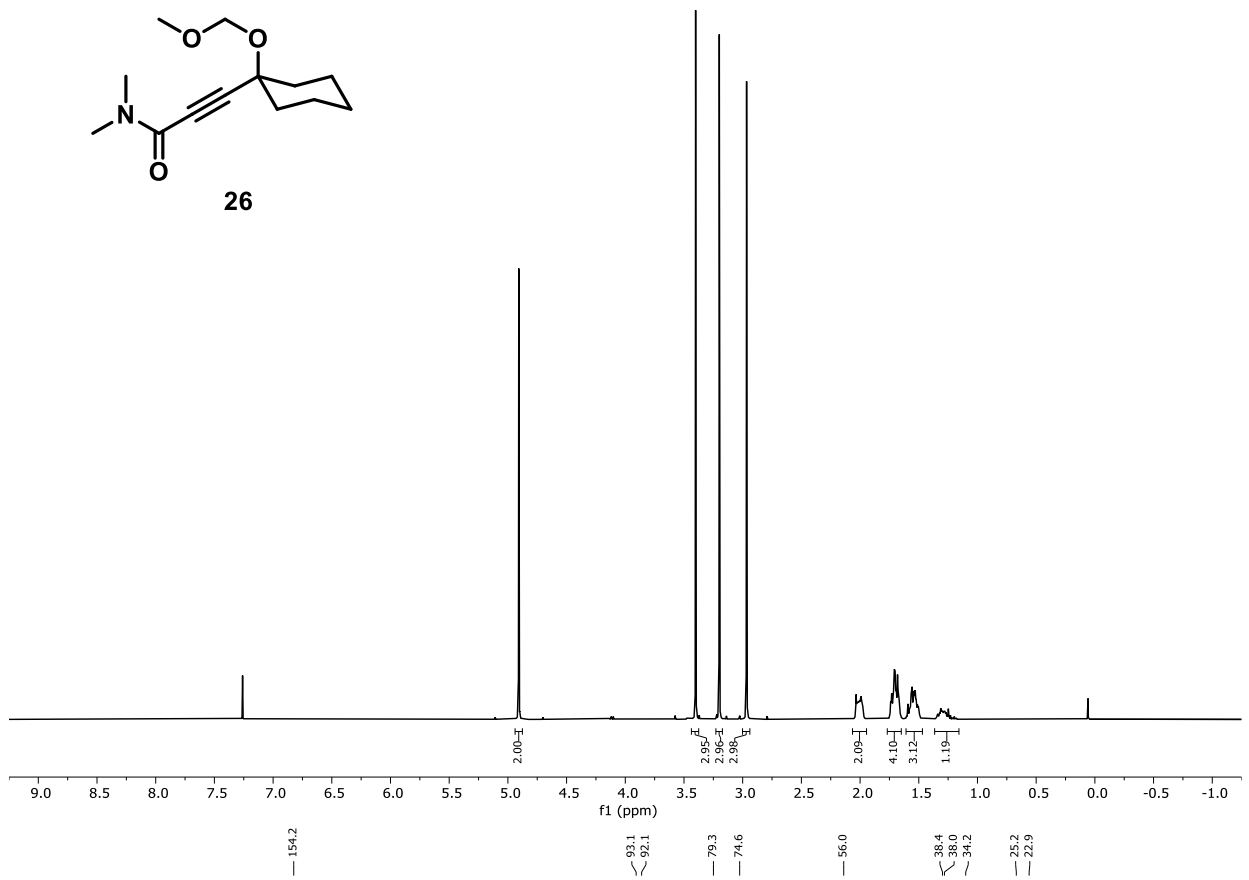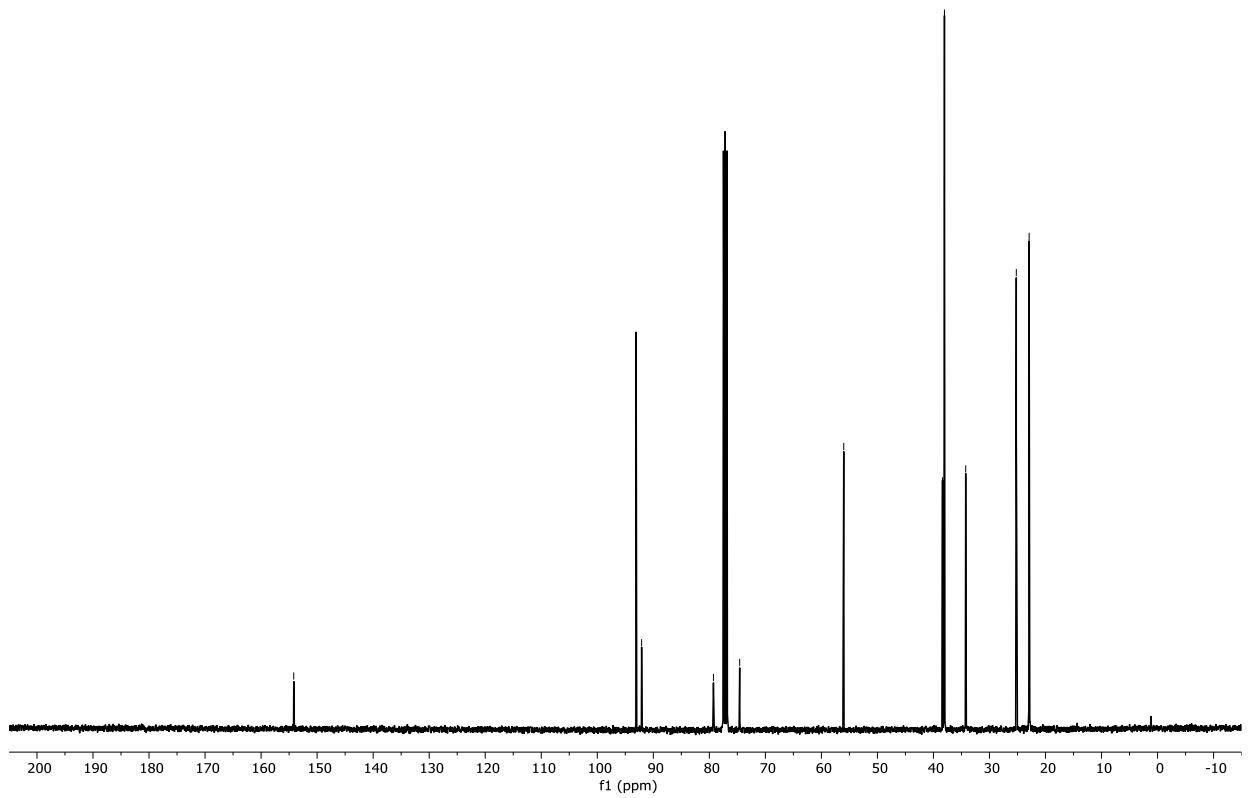

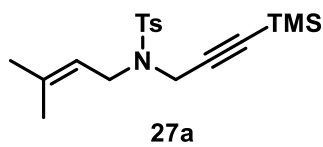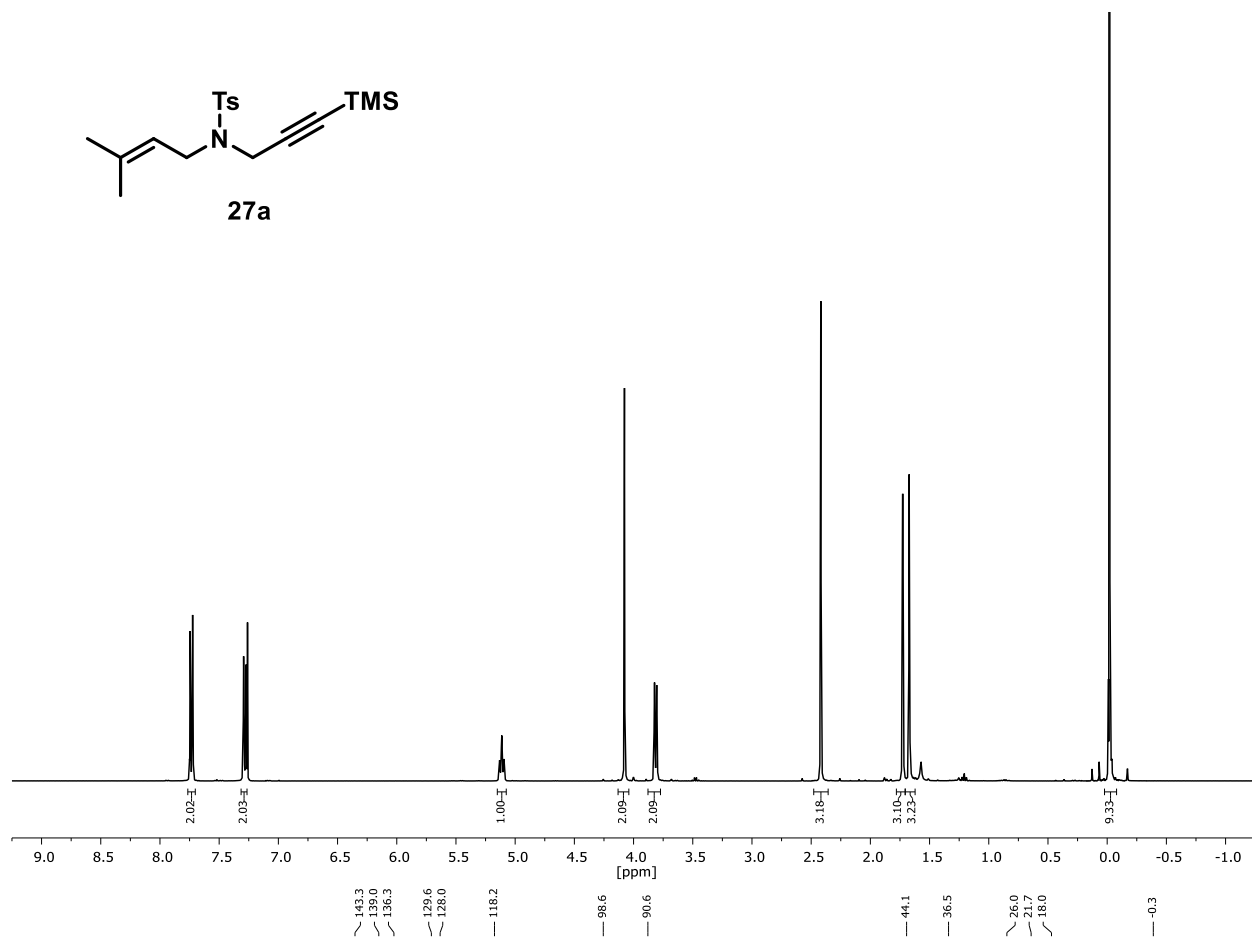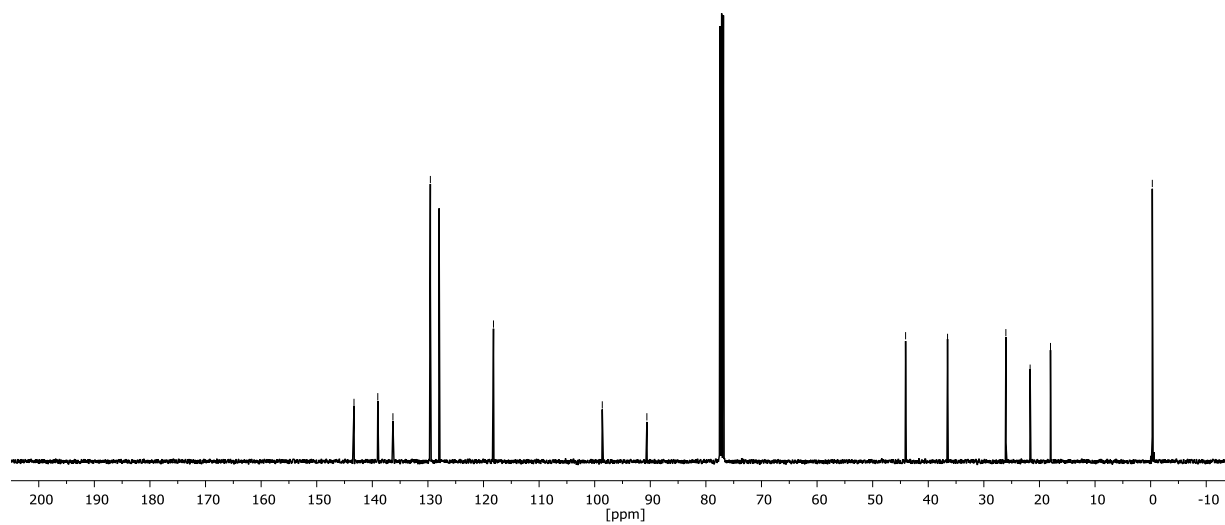

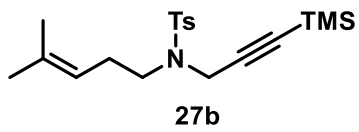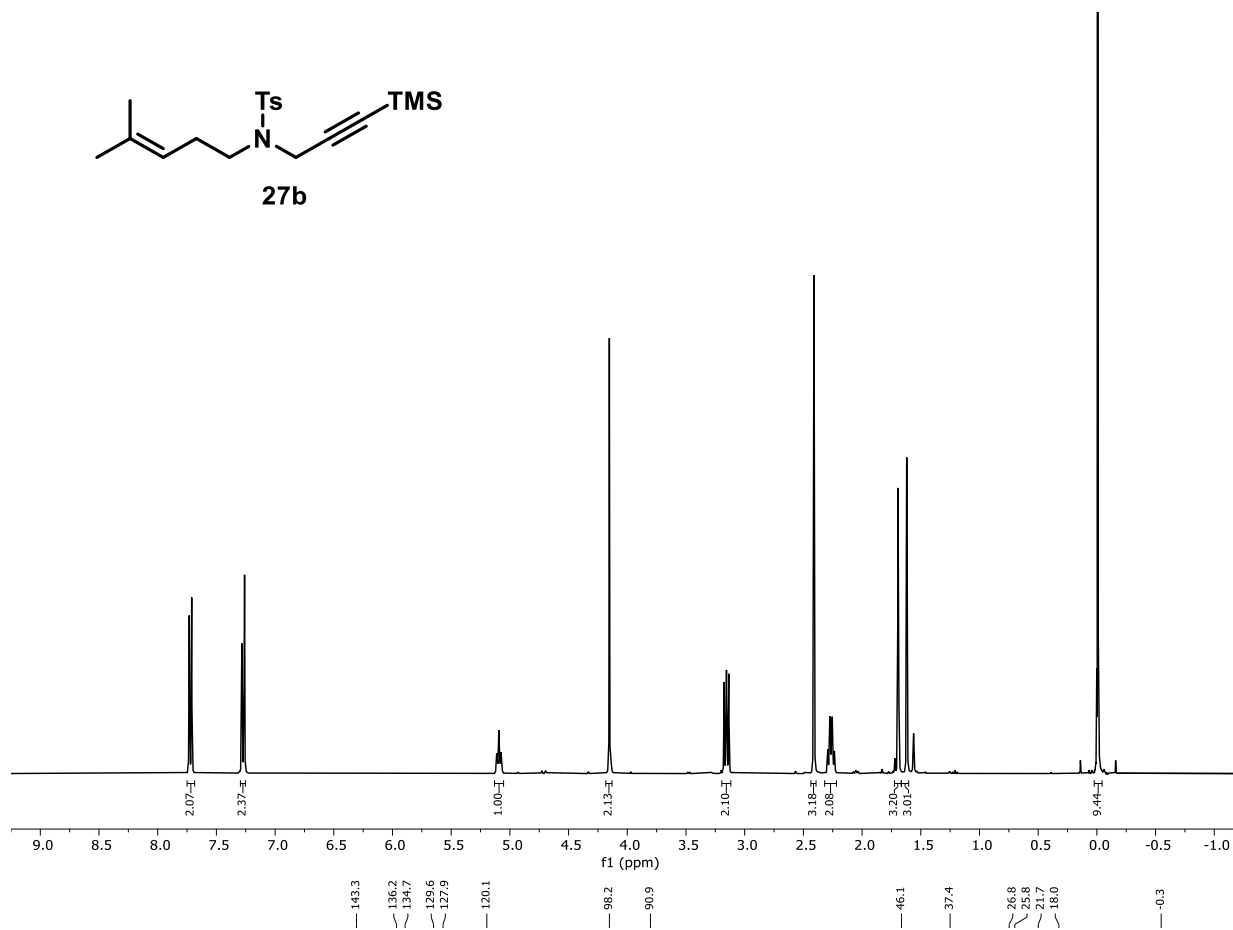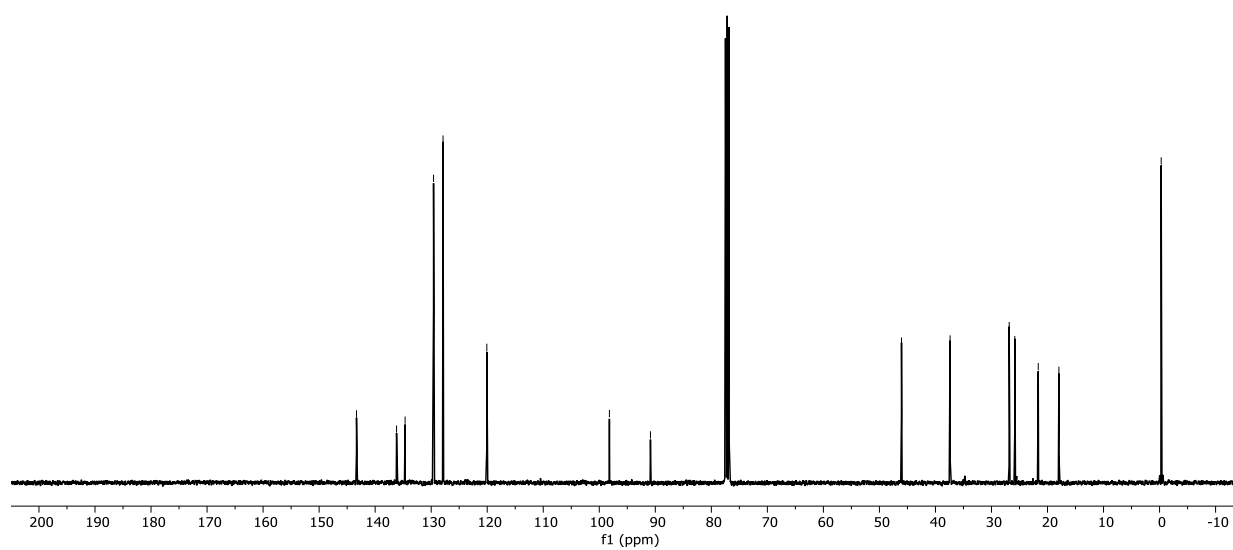

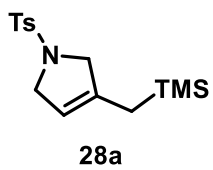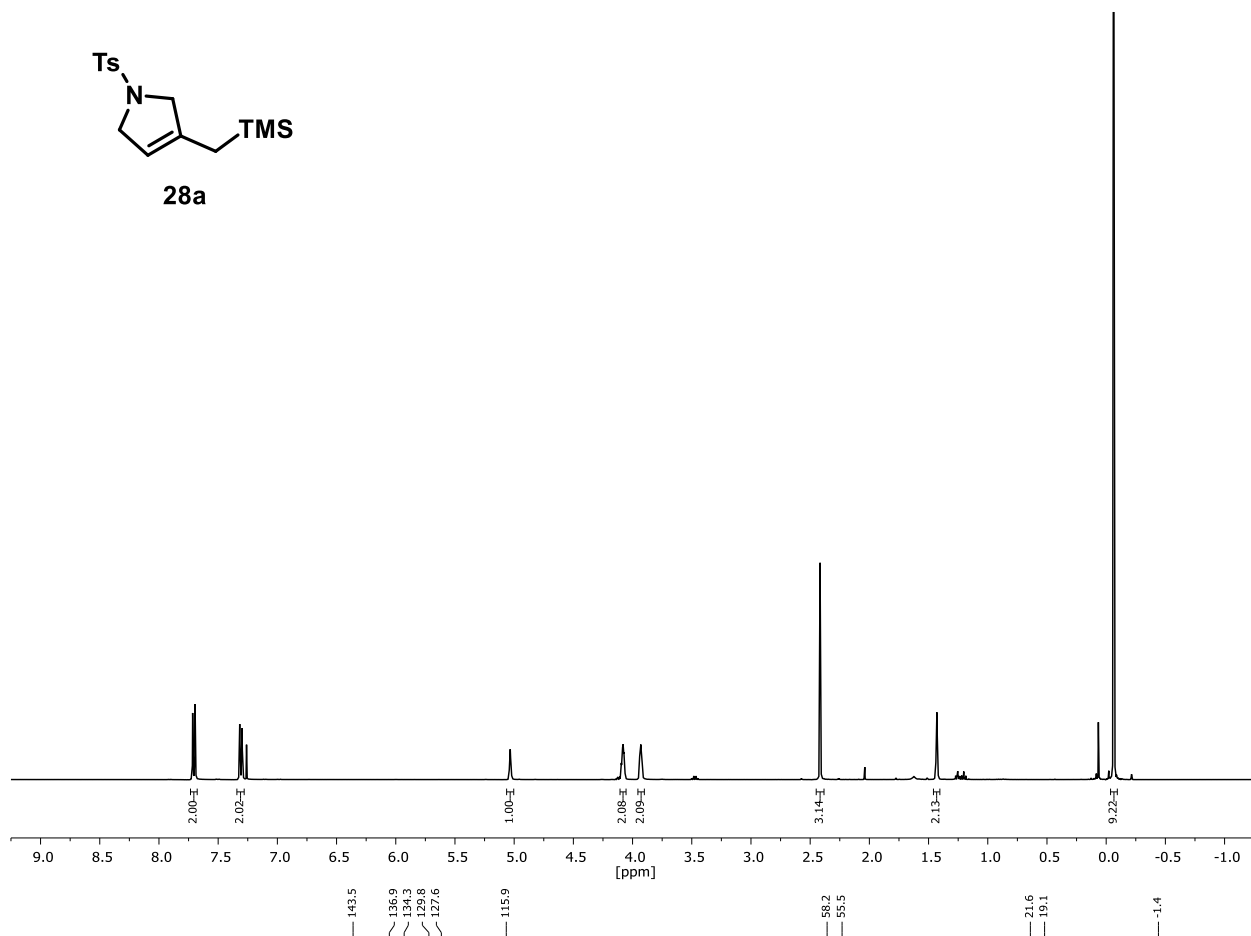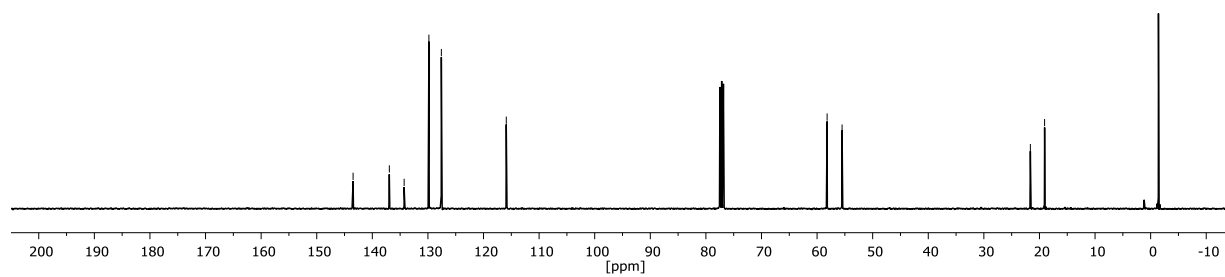

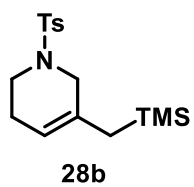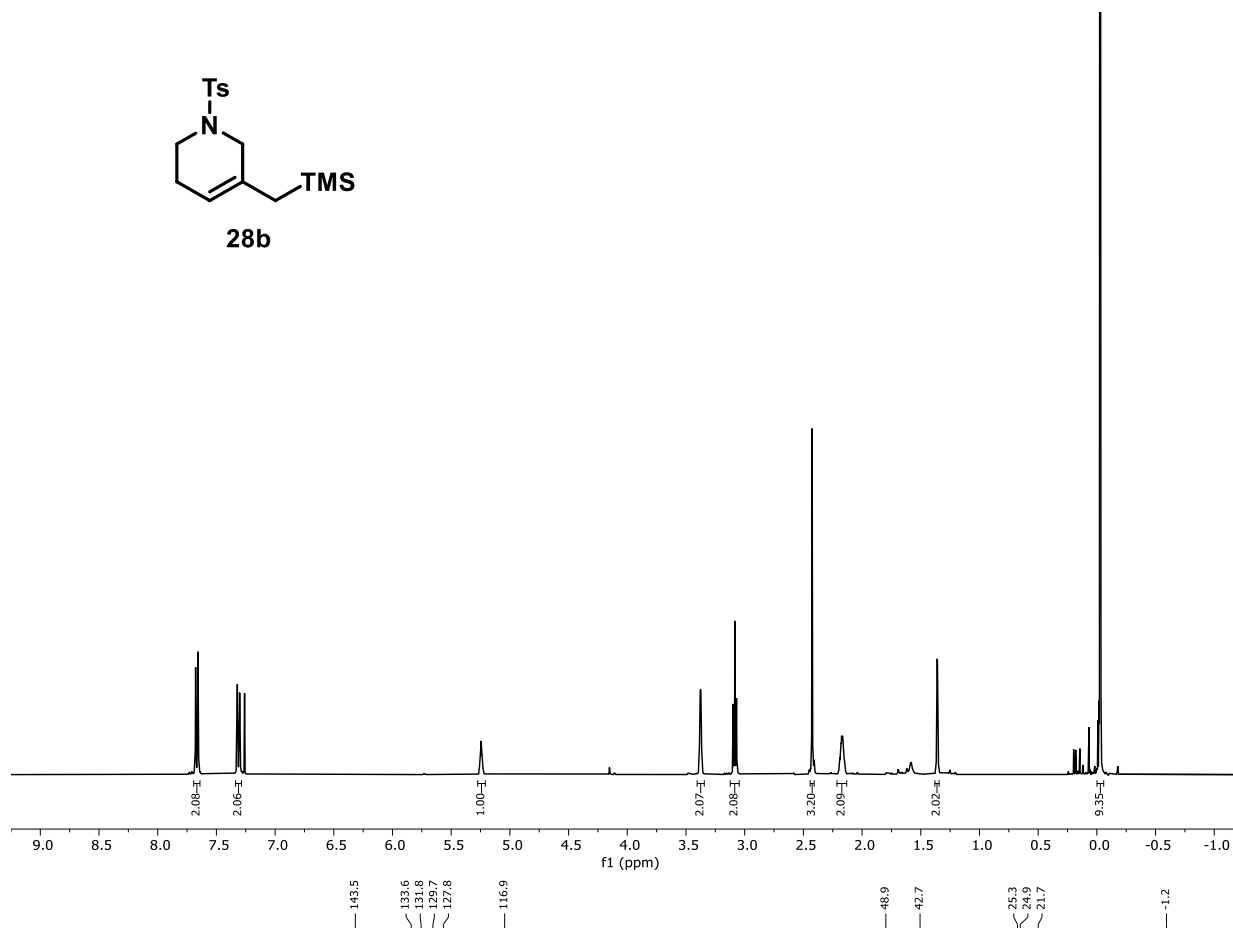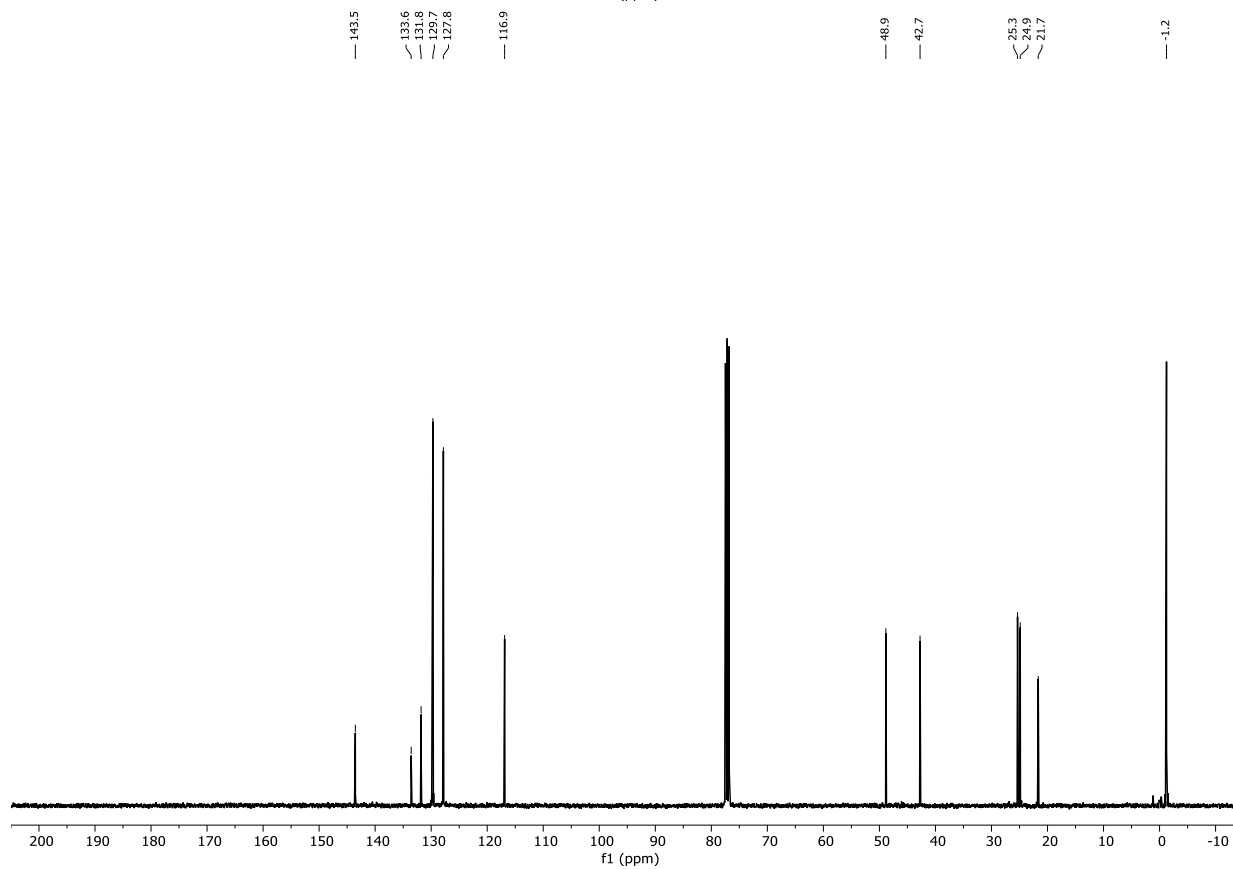

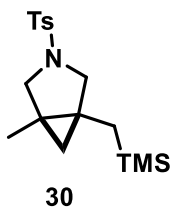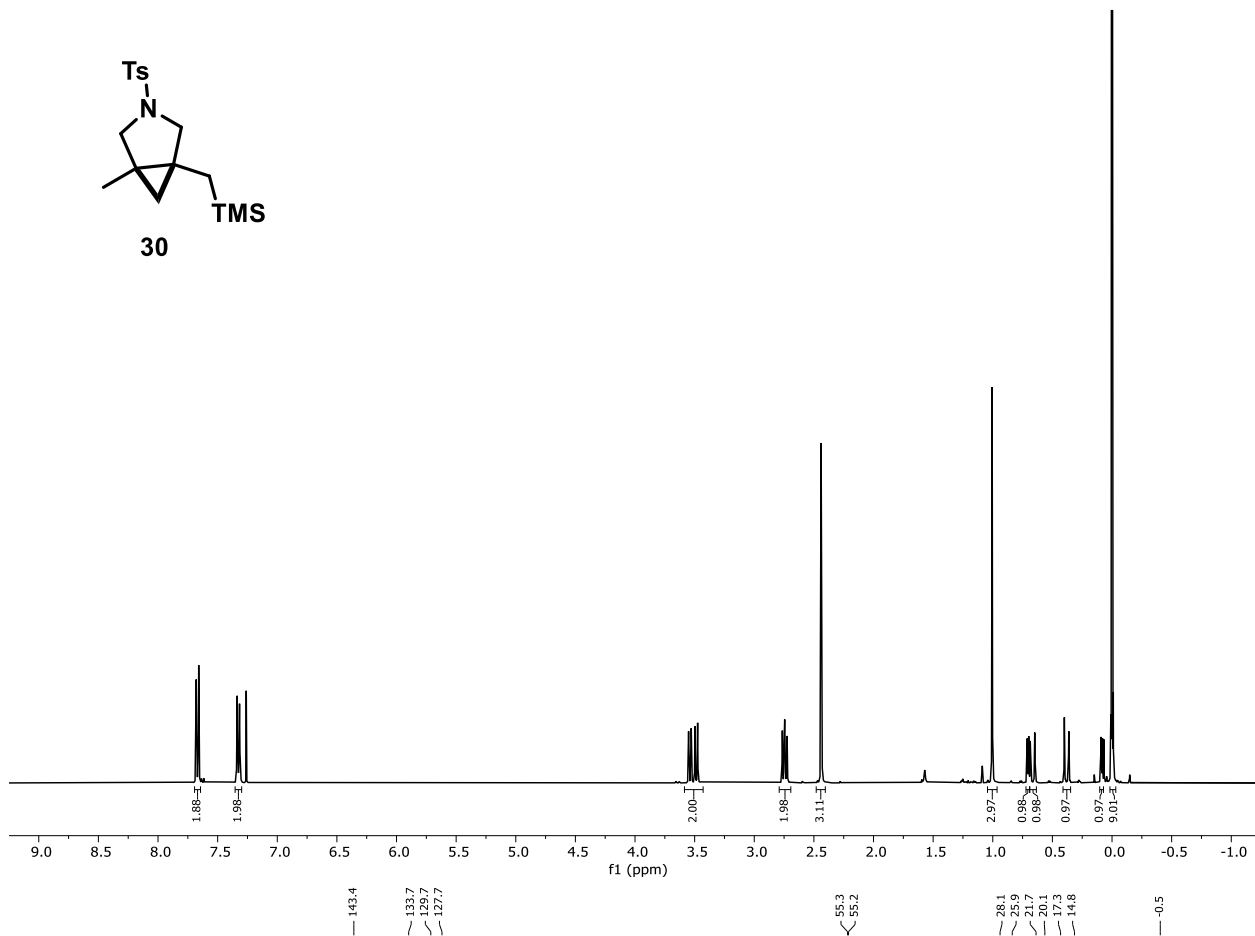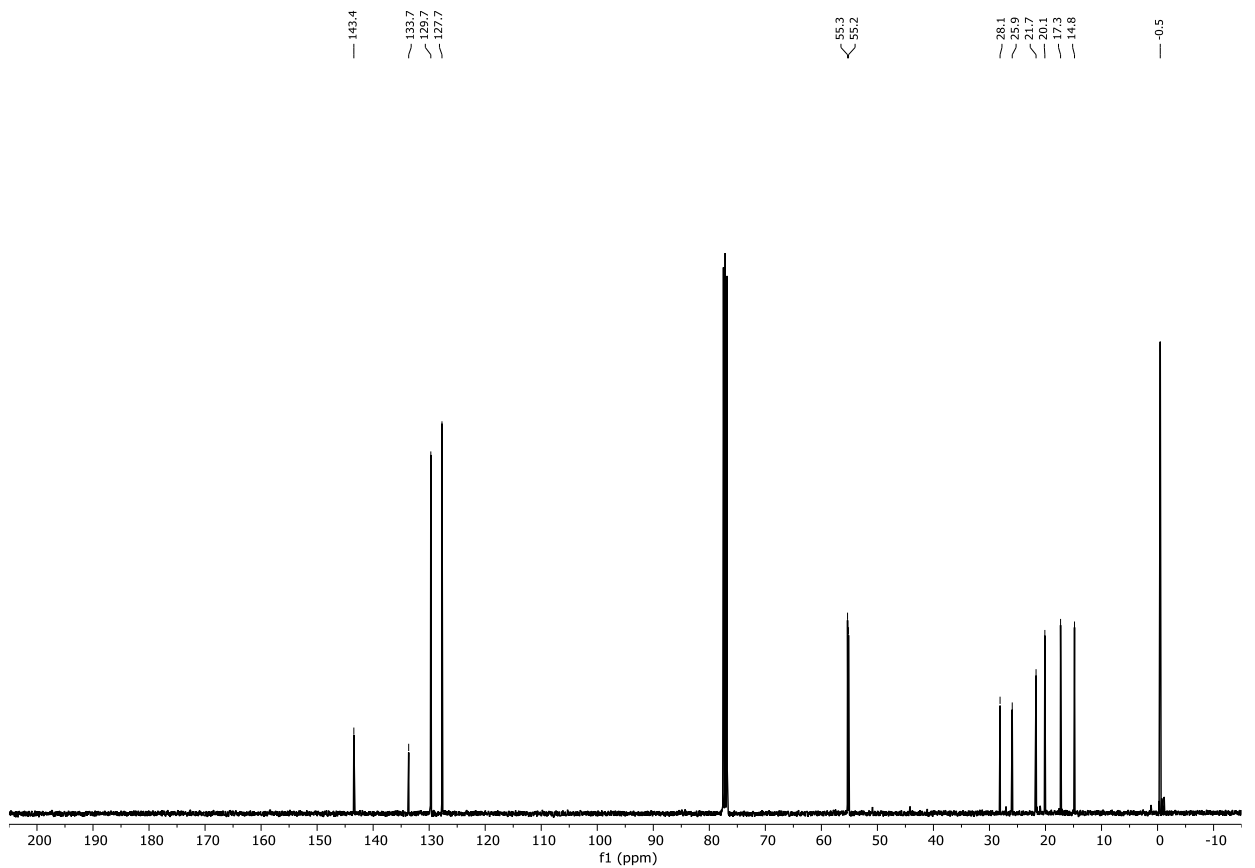



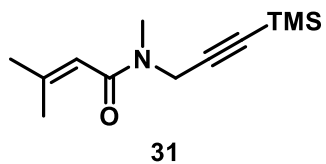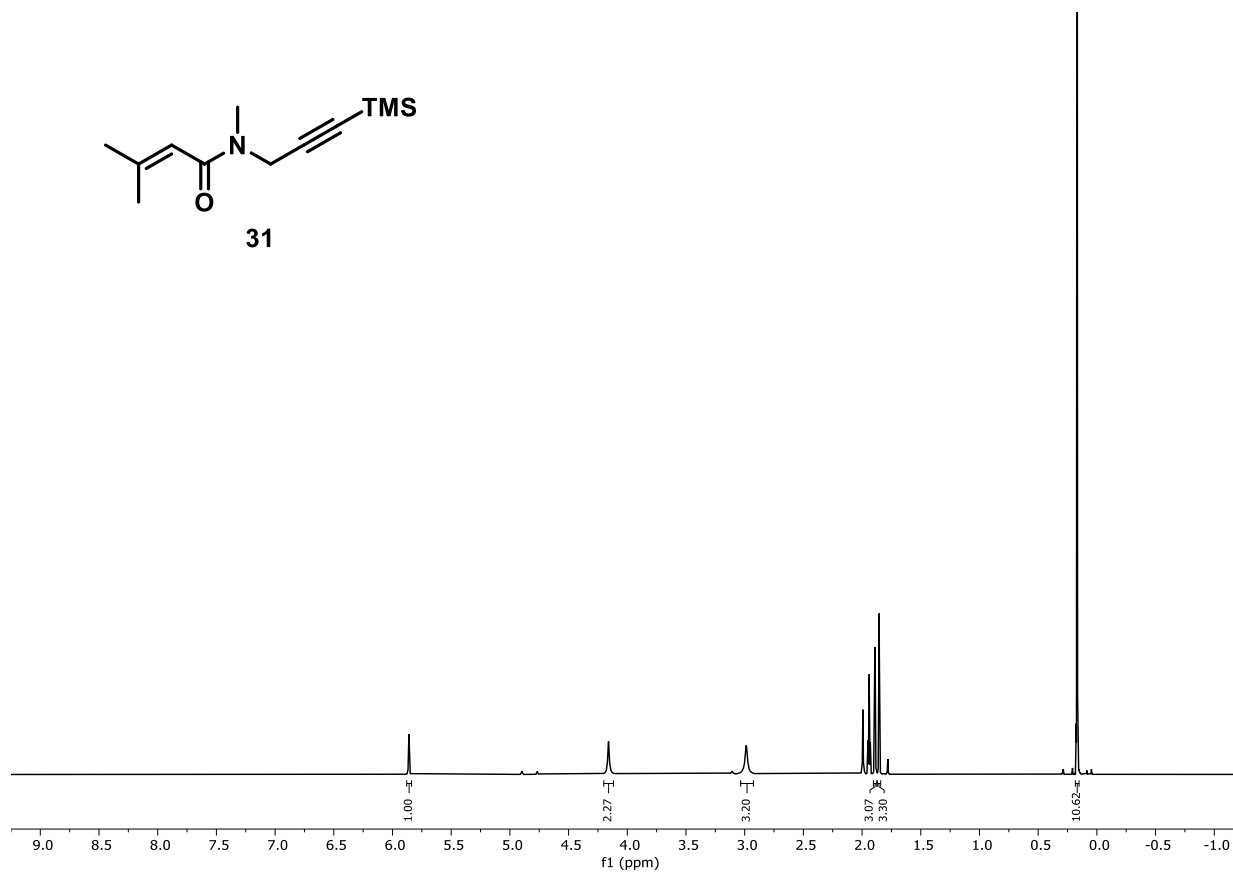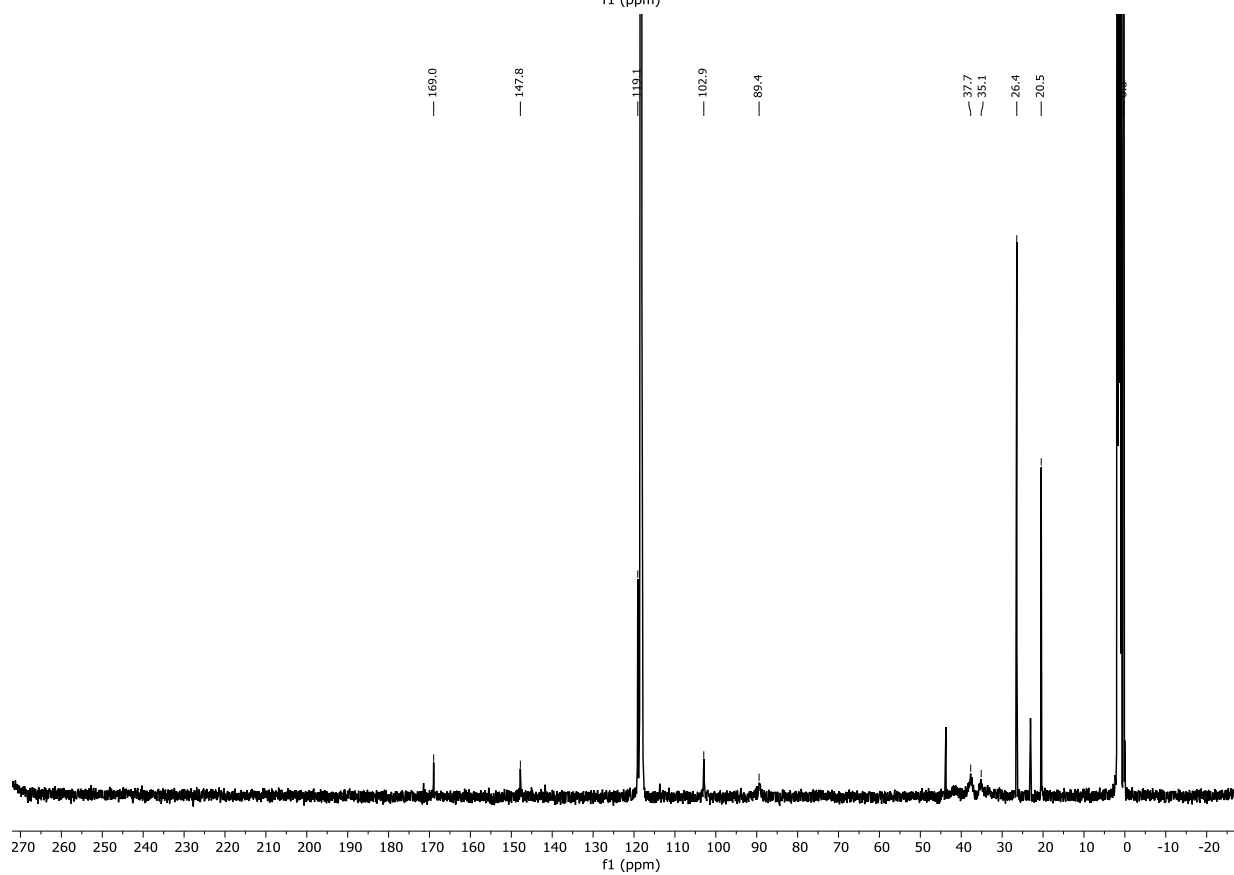

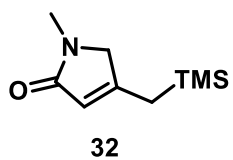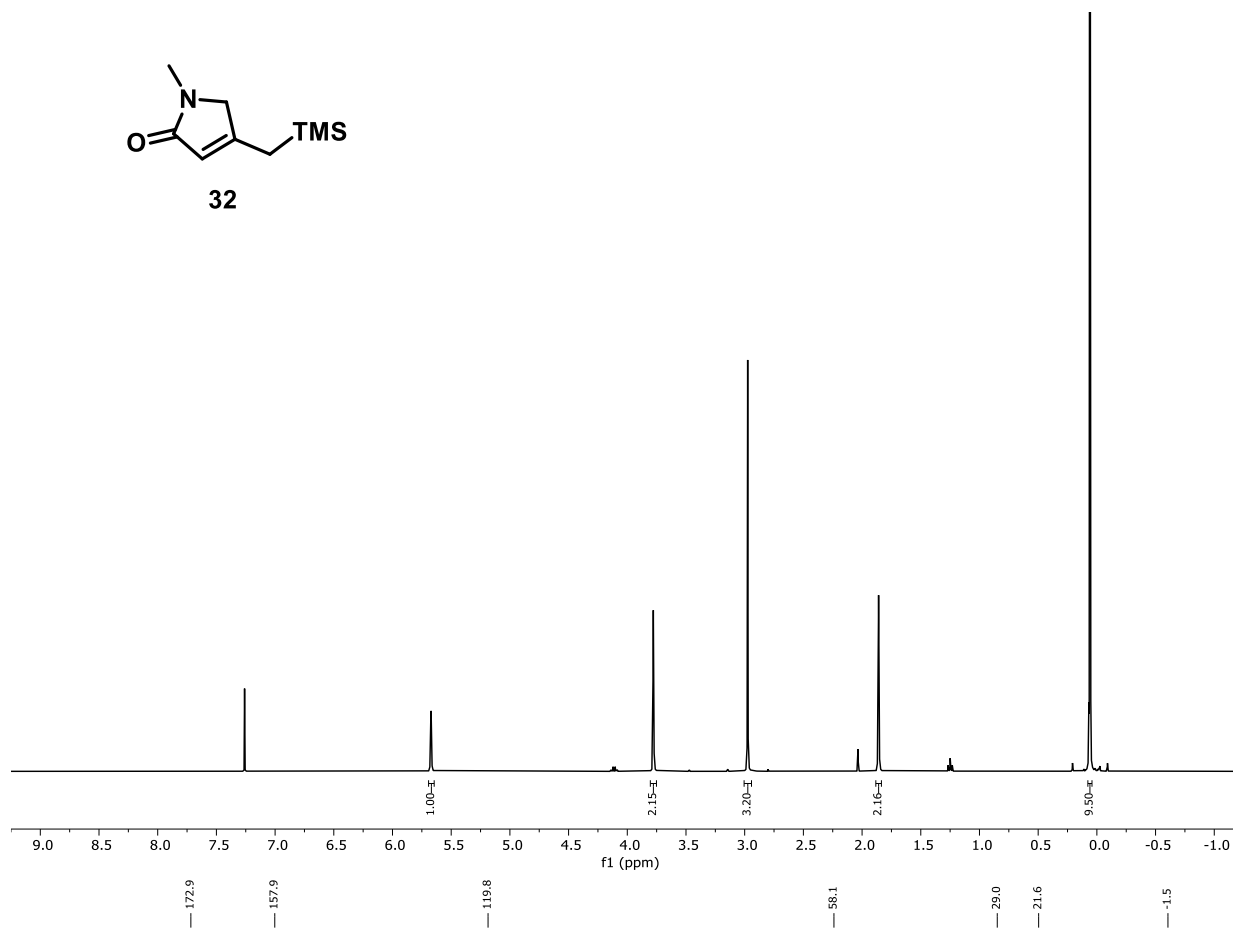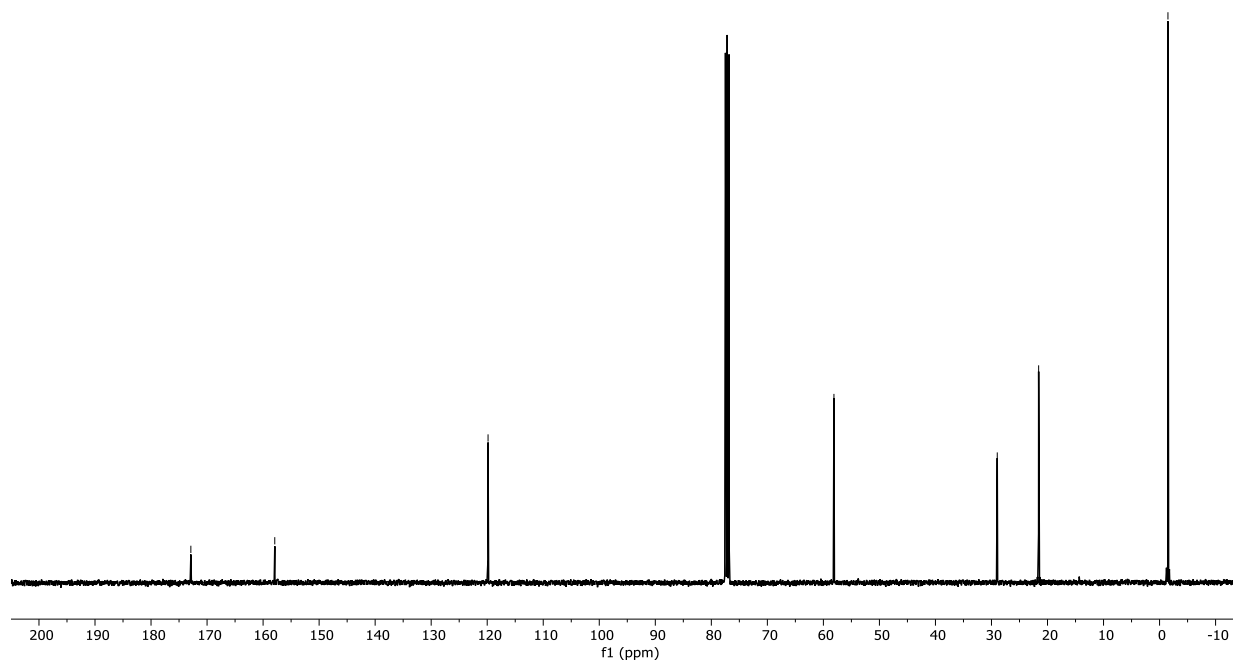

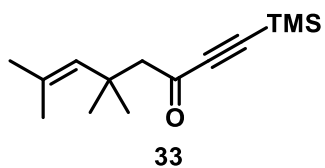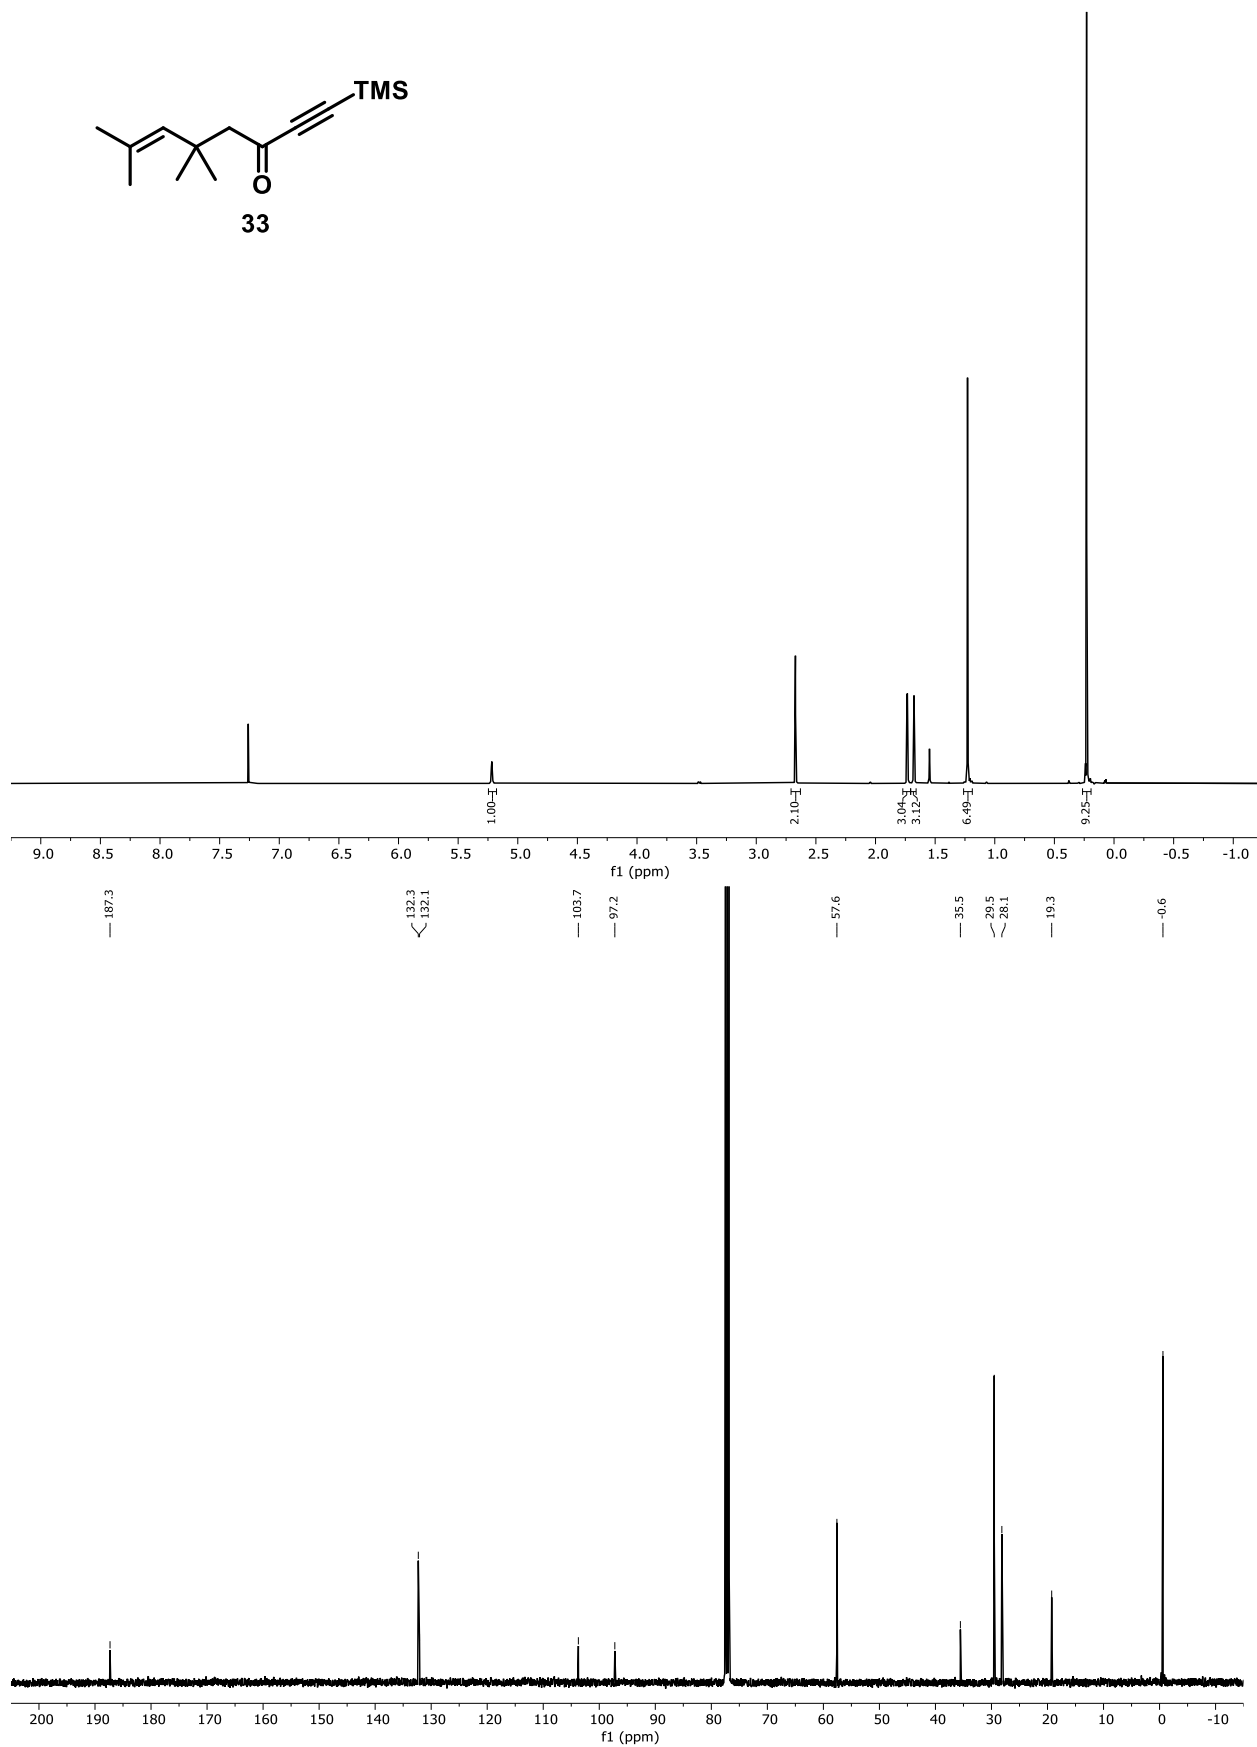

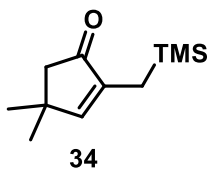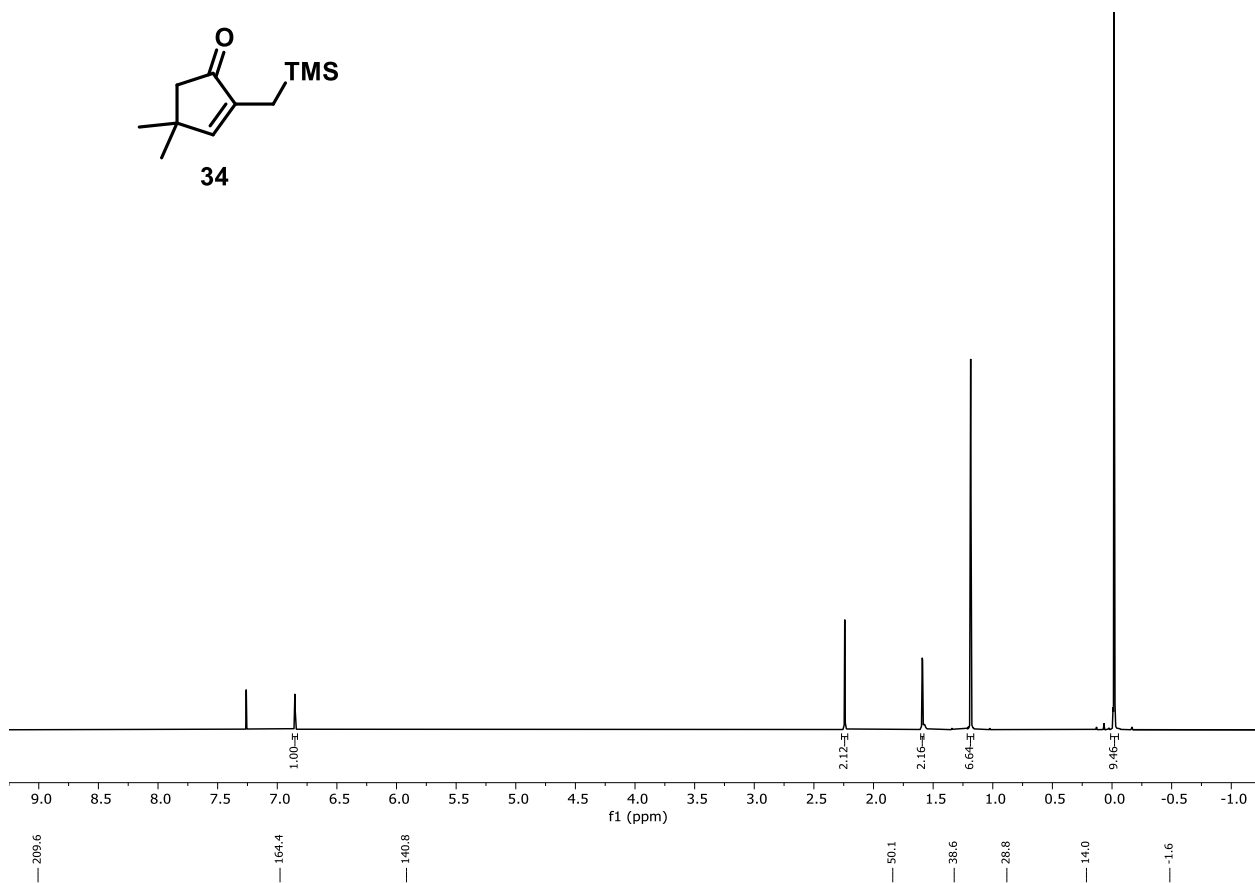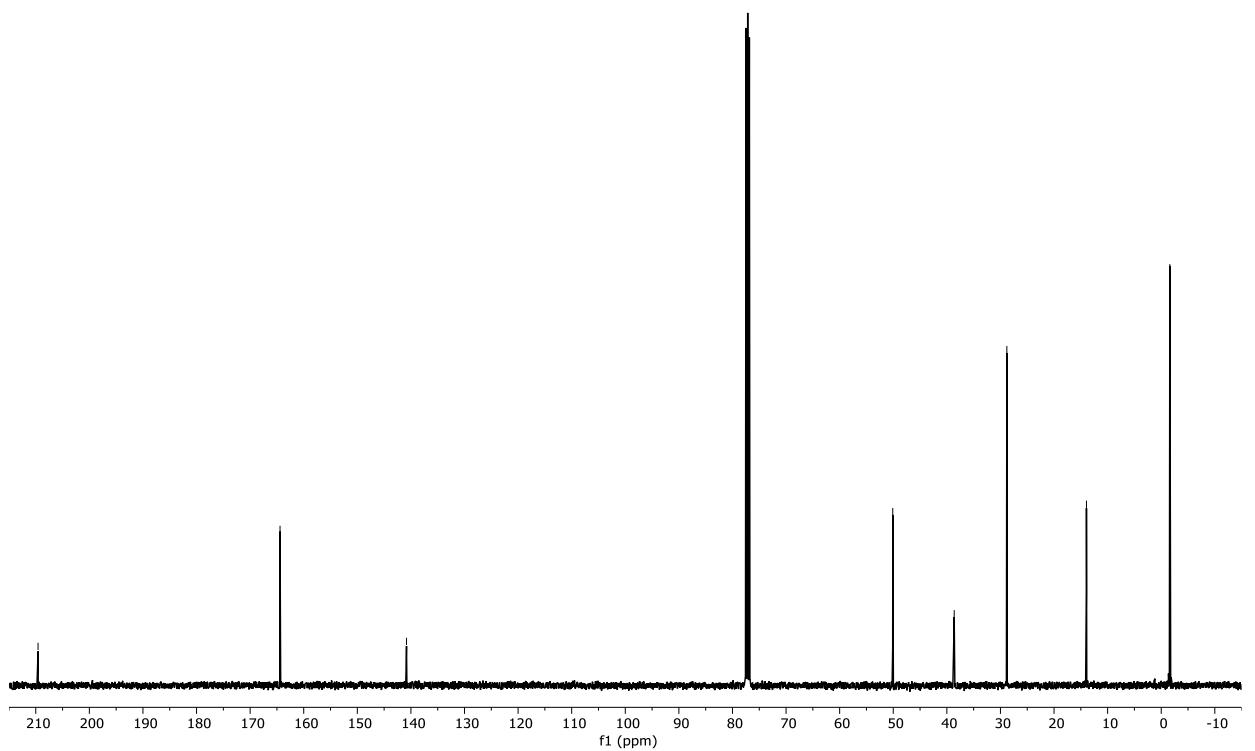

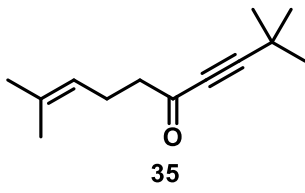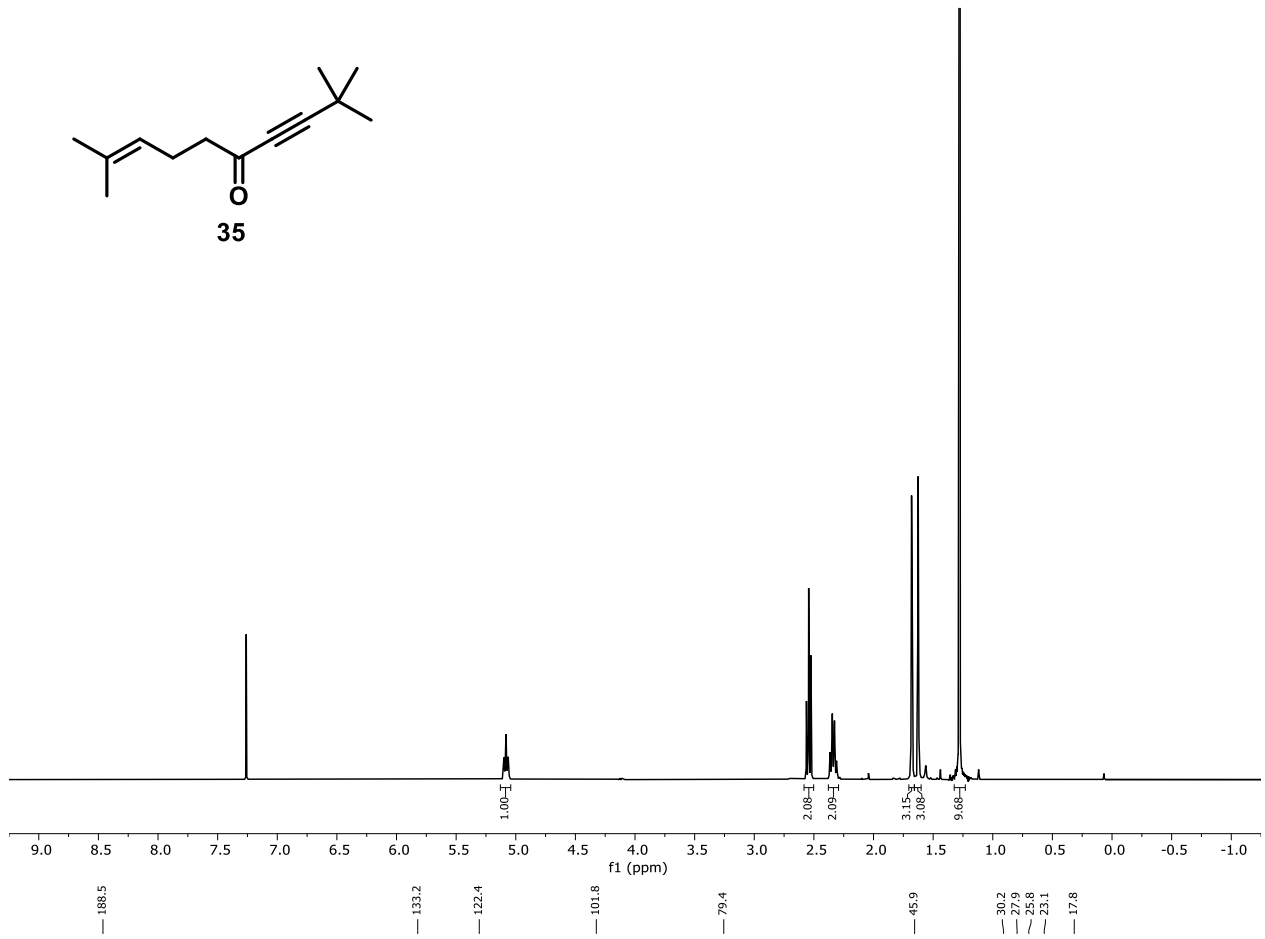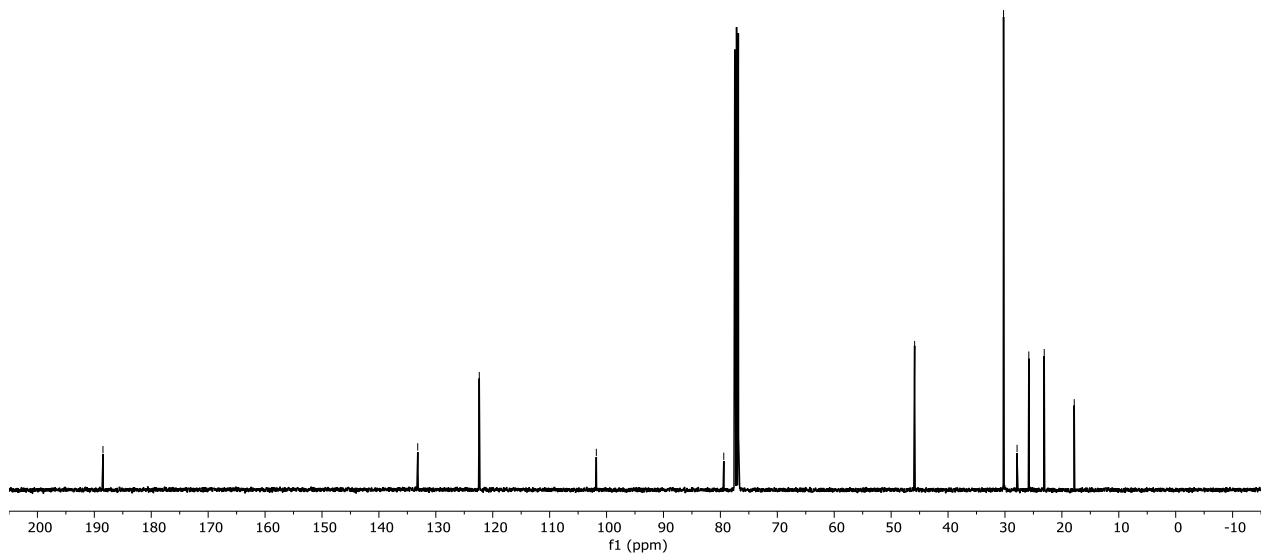

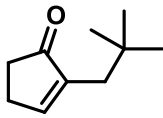

36

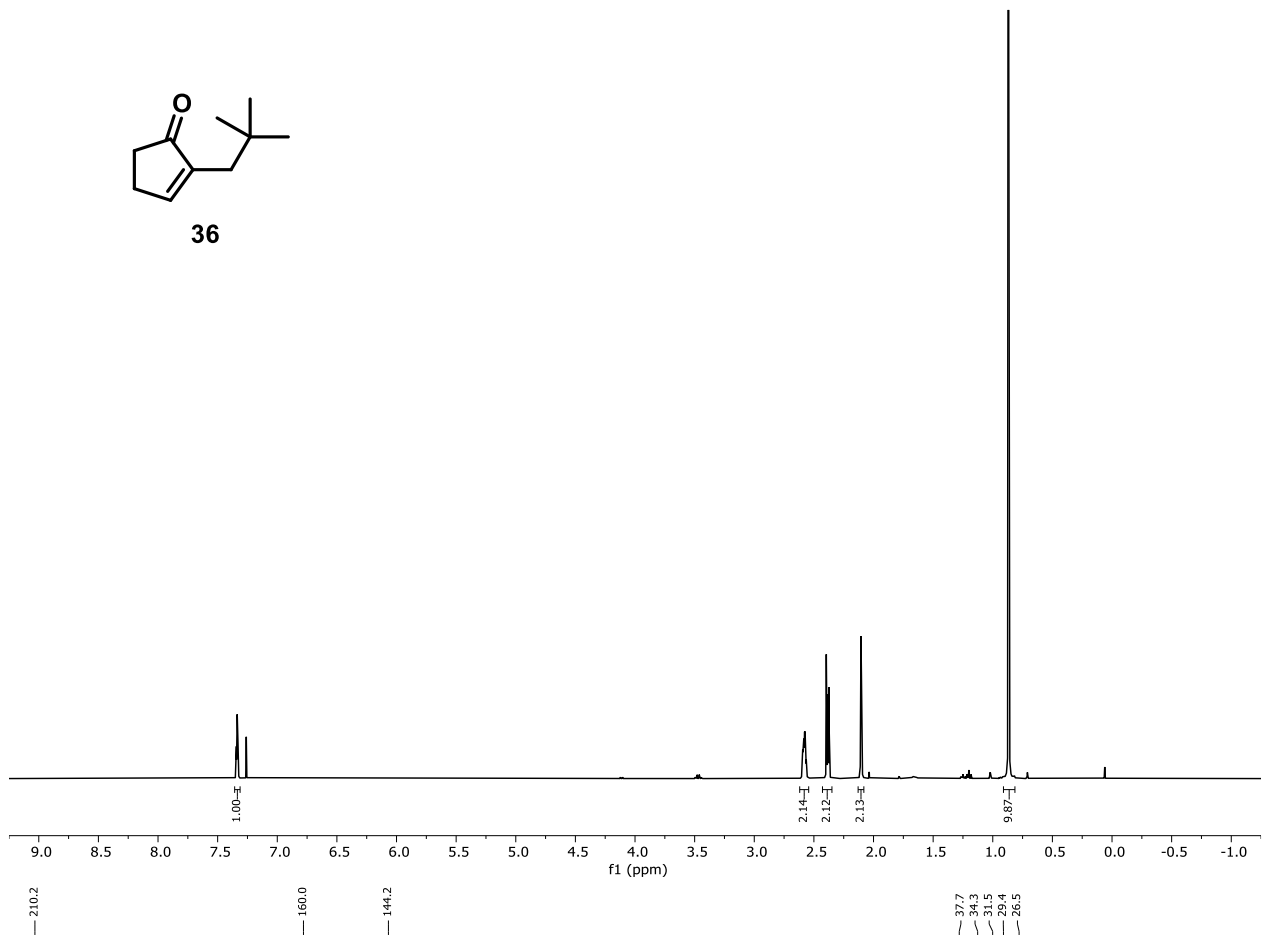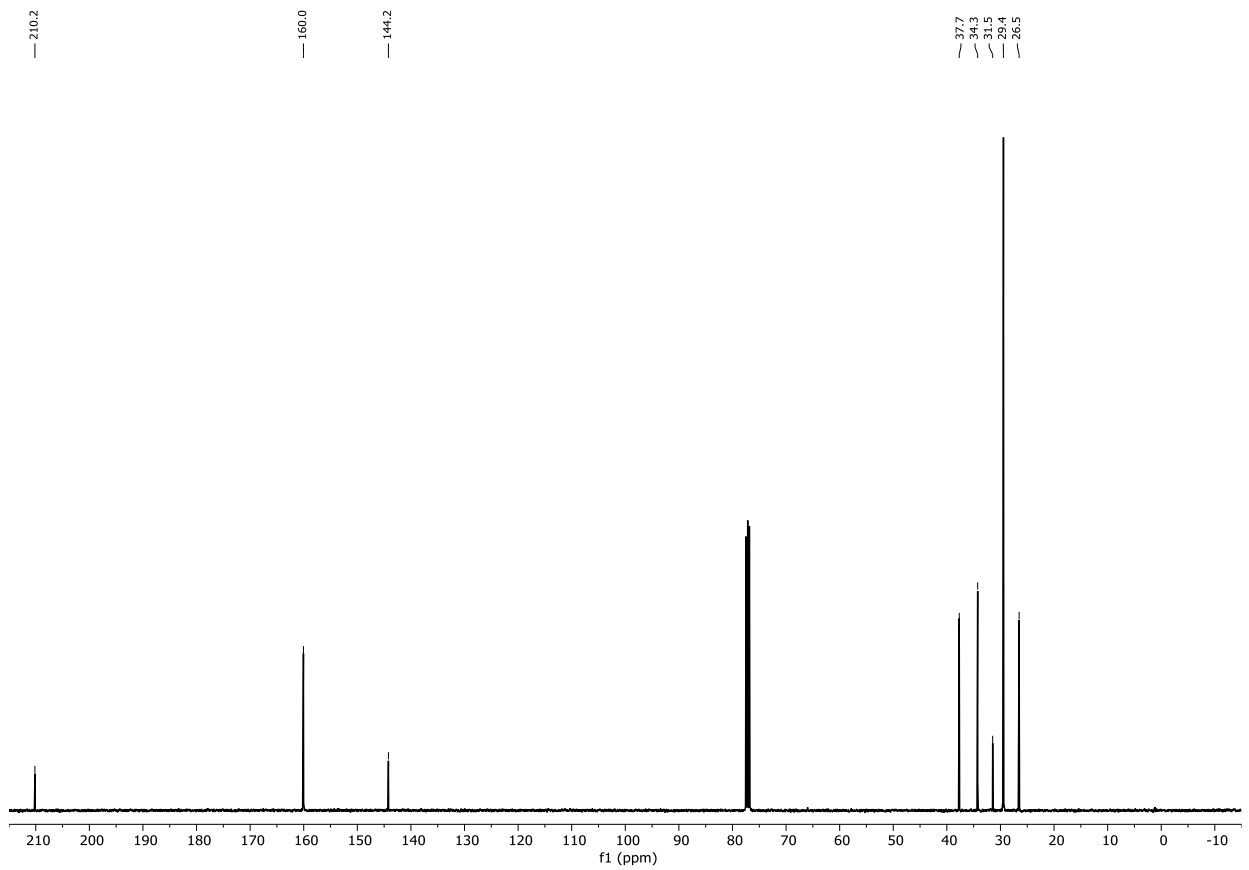

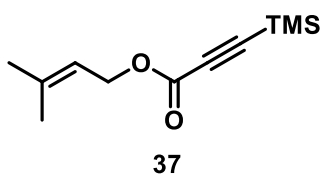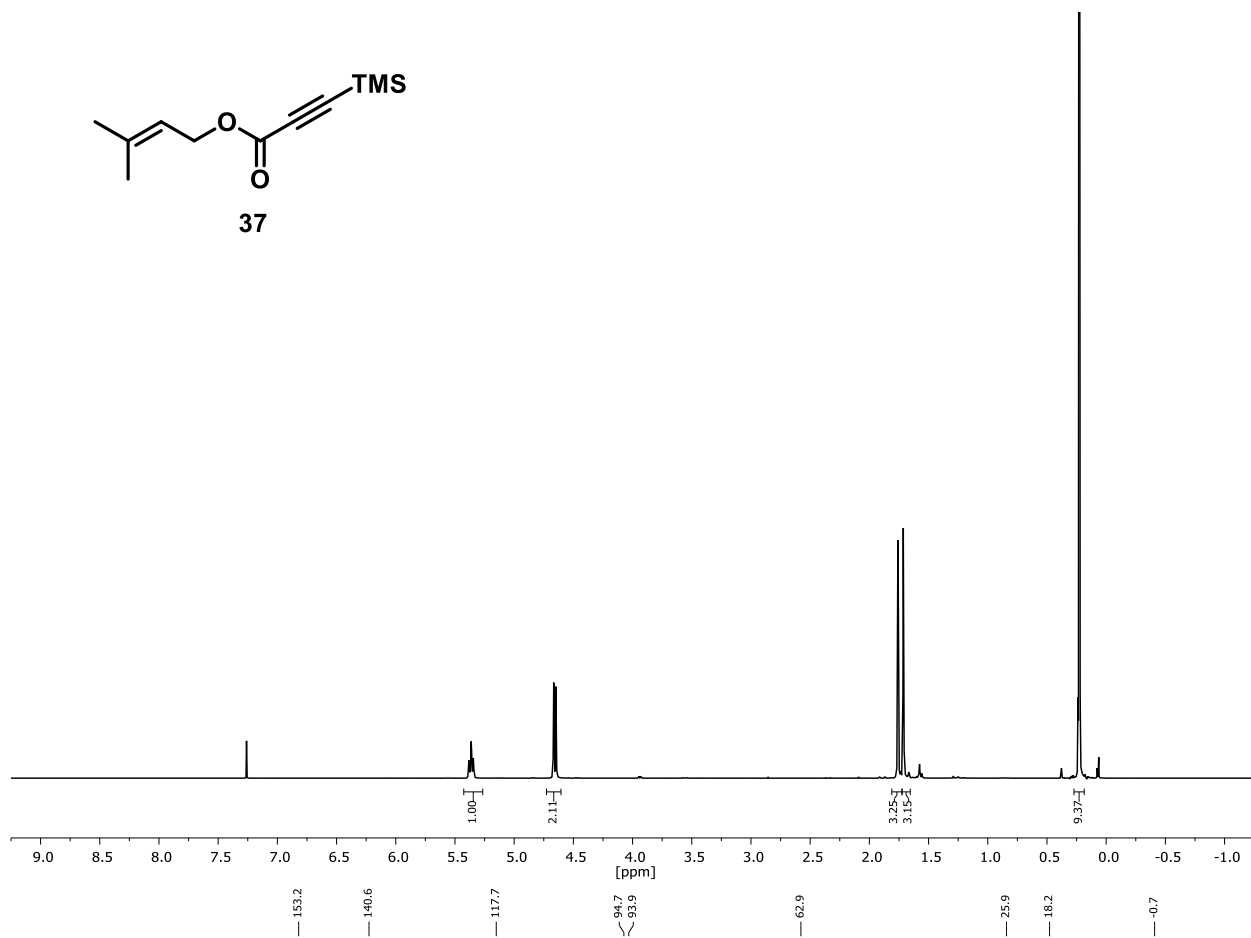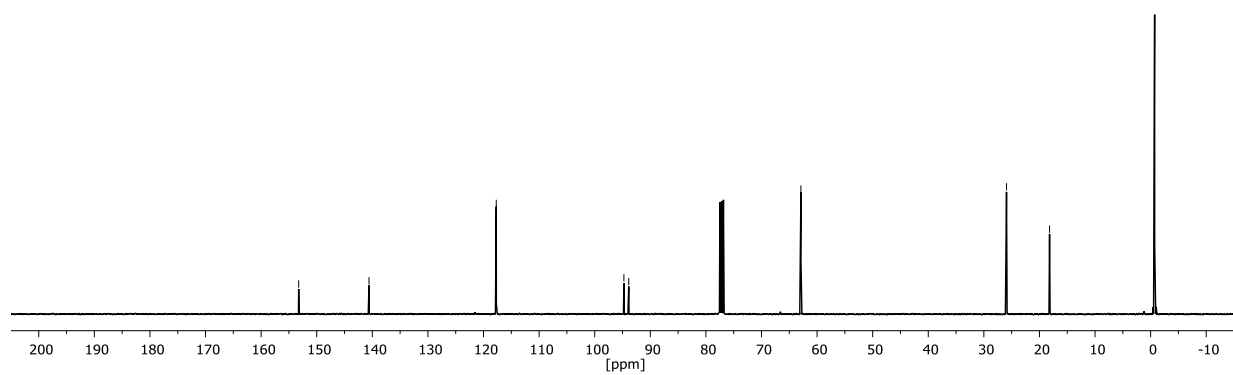

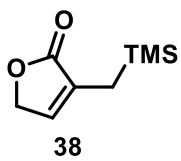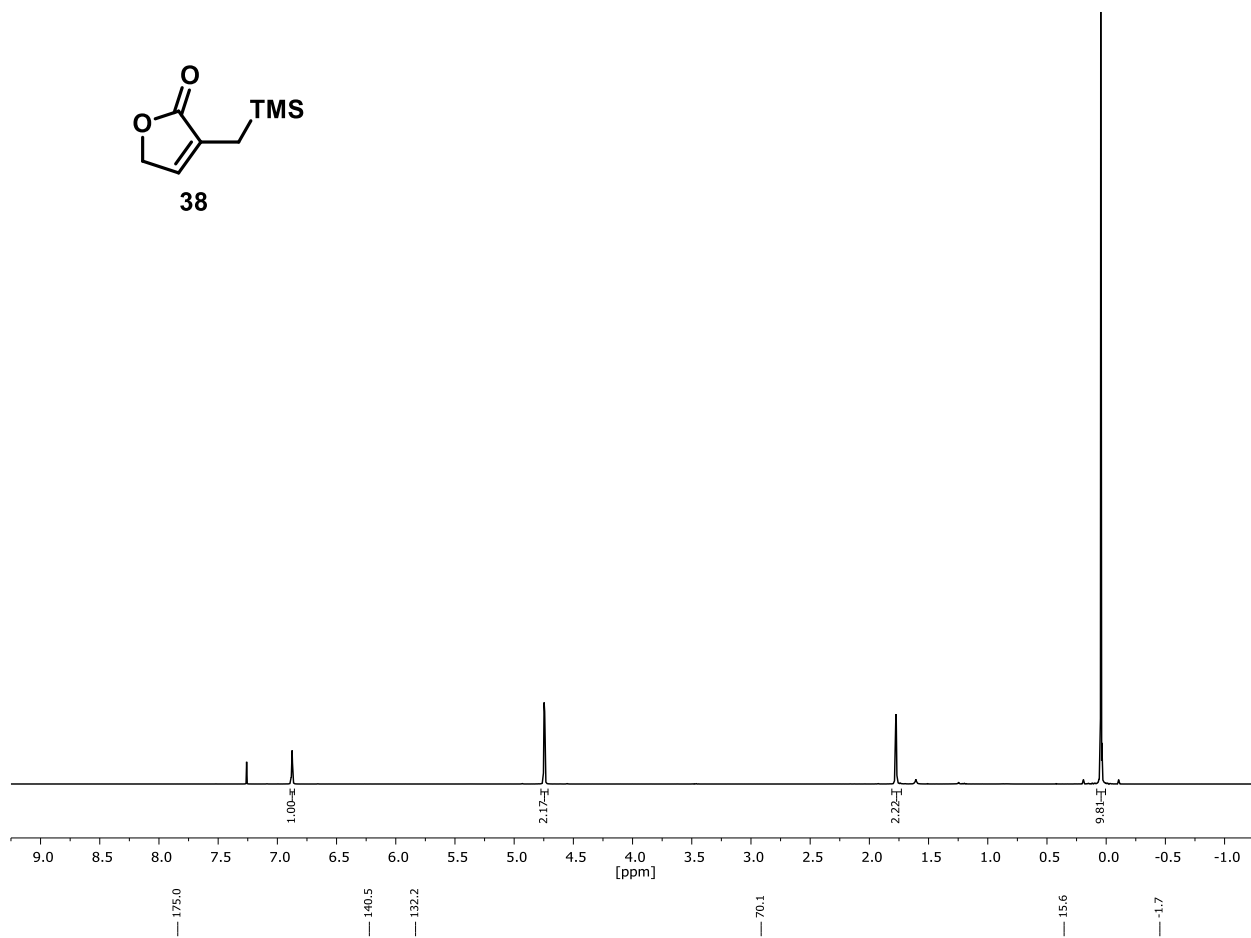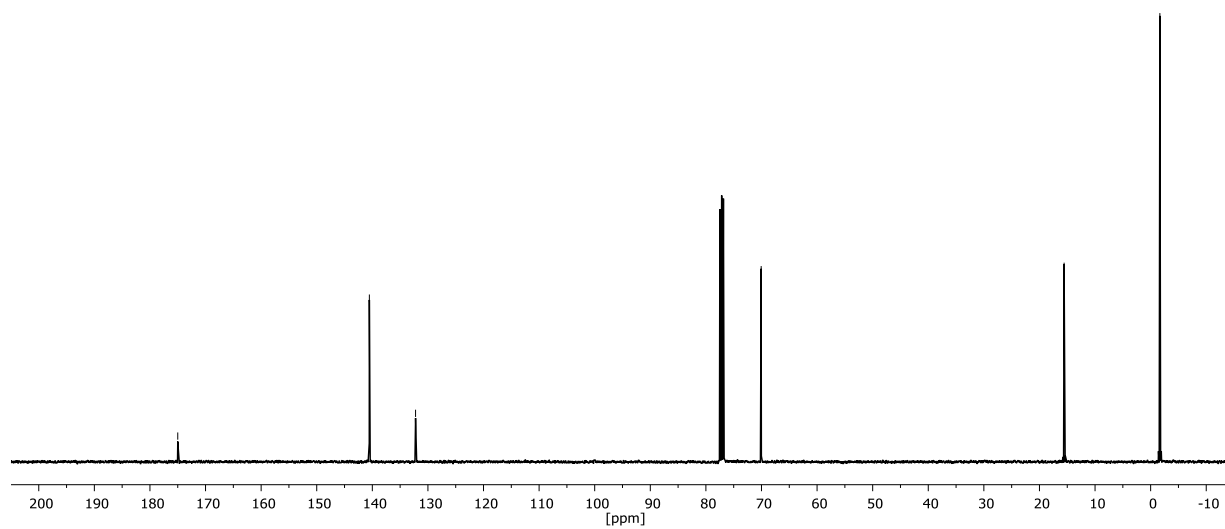



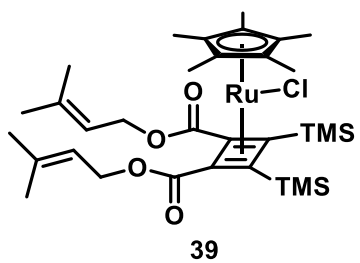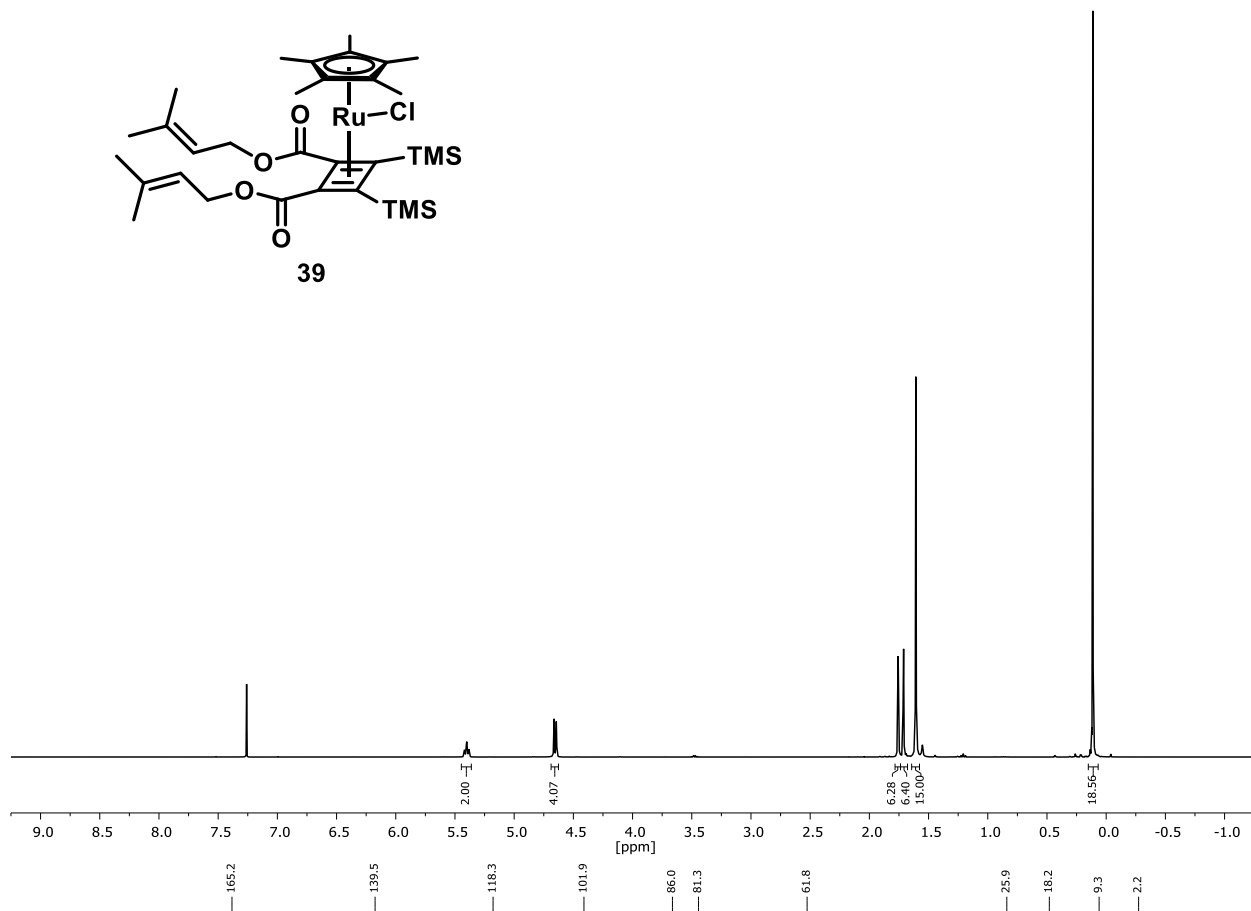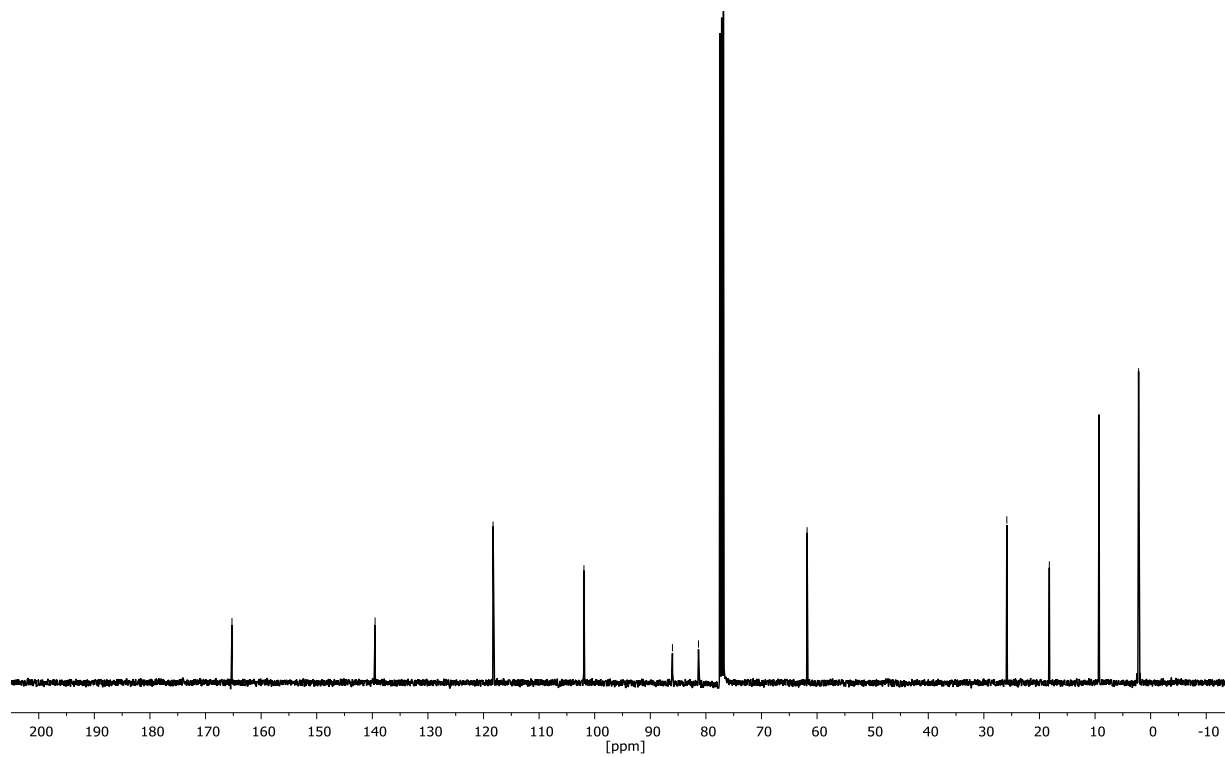

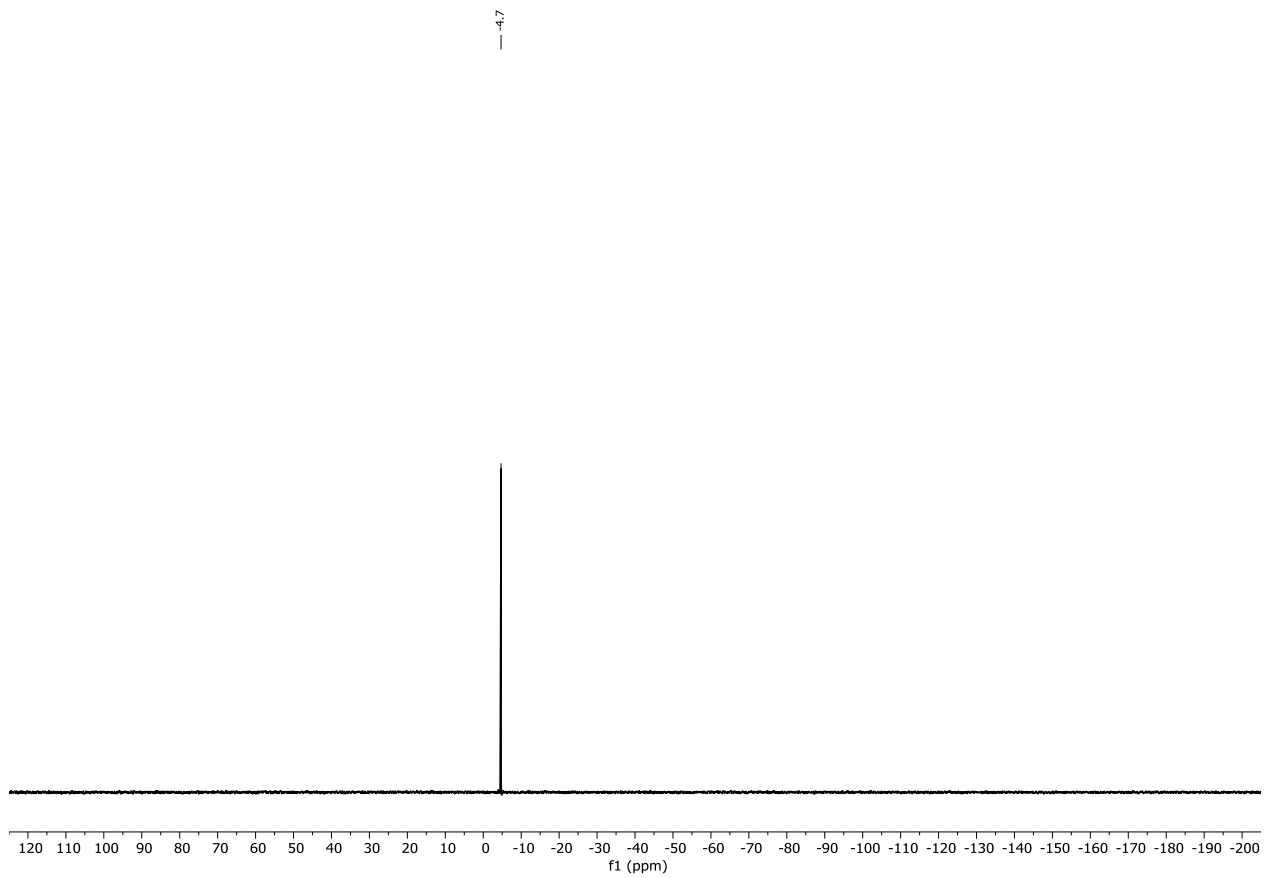

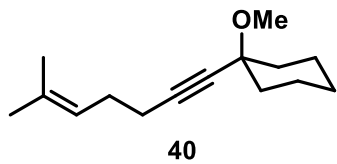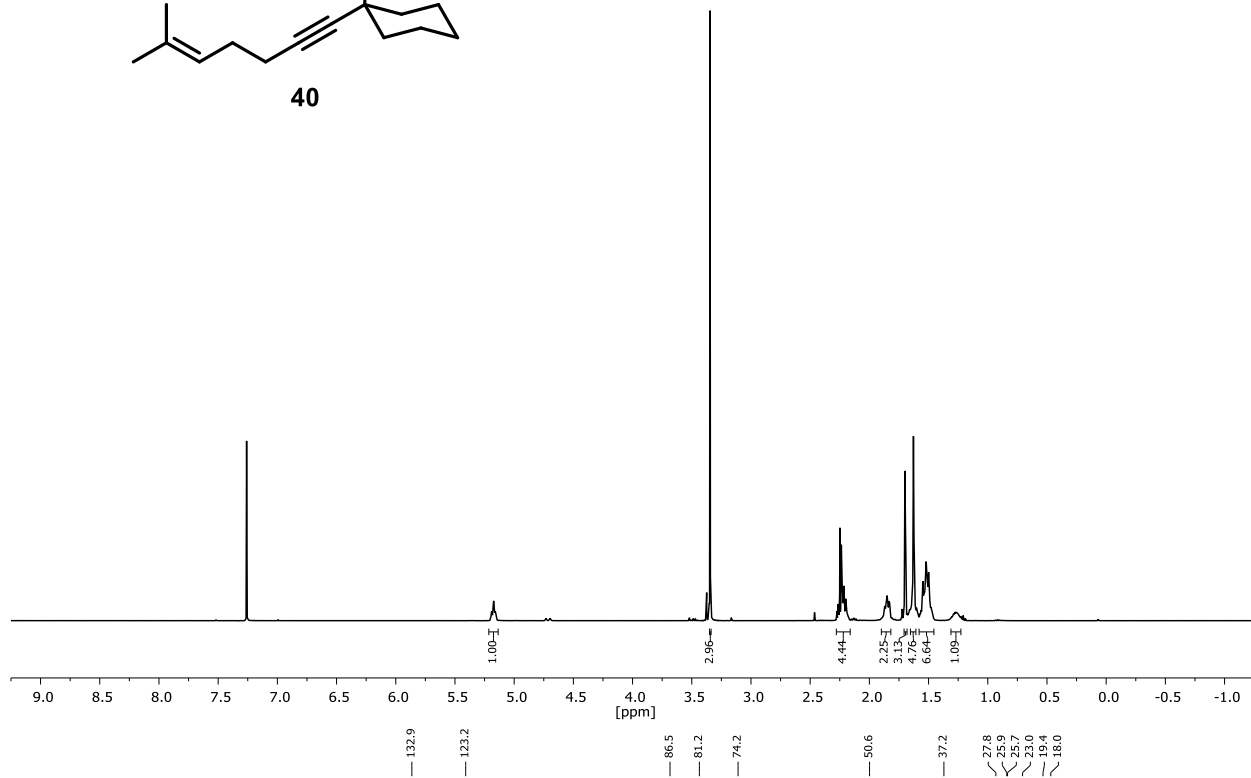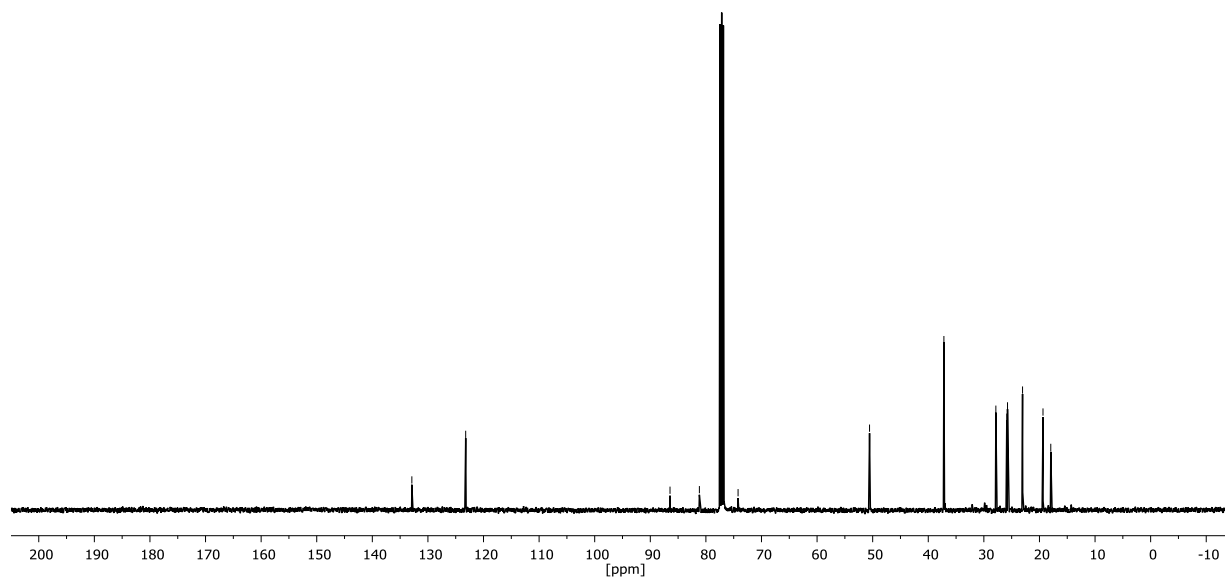

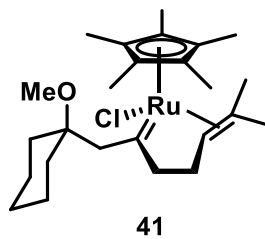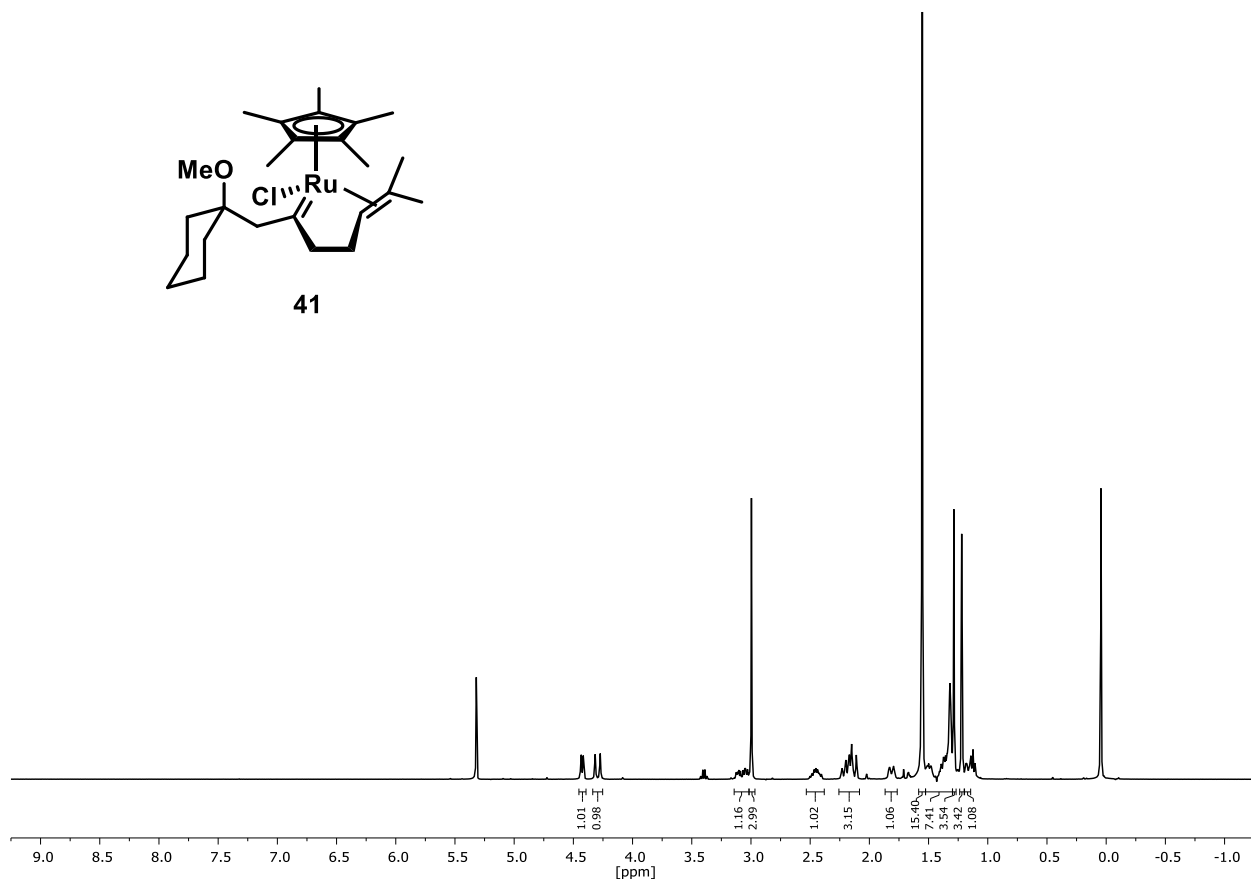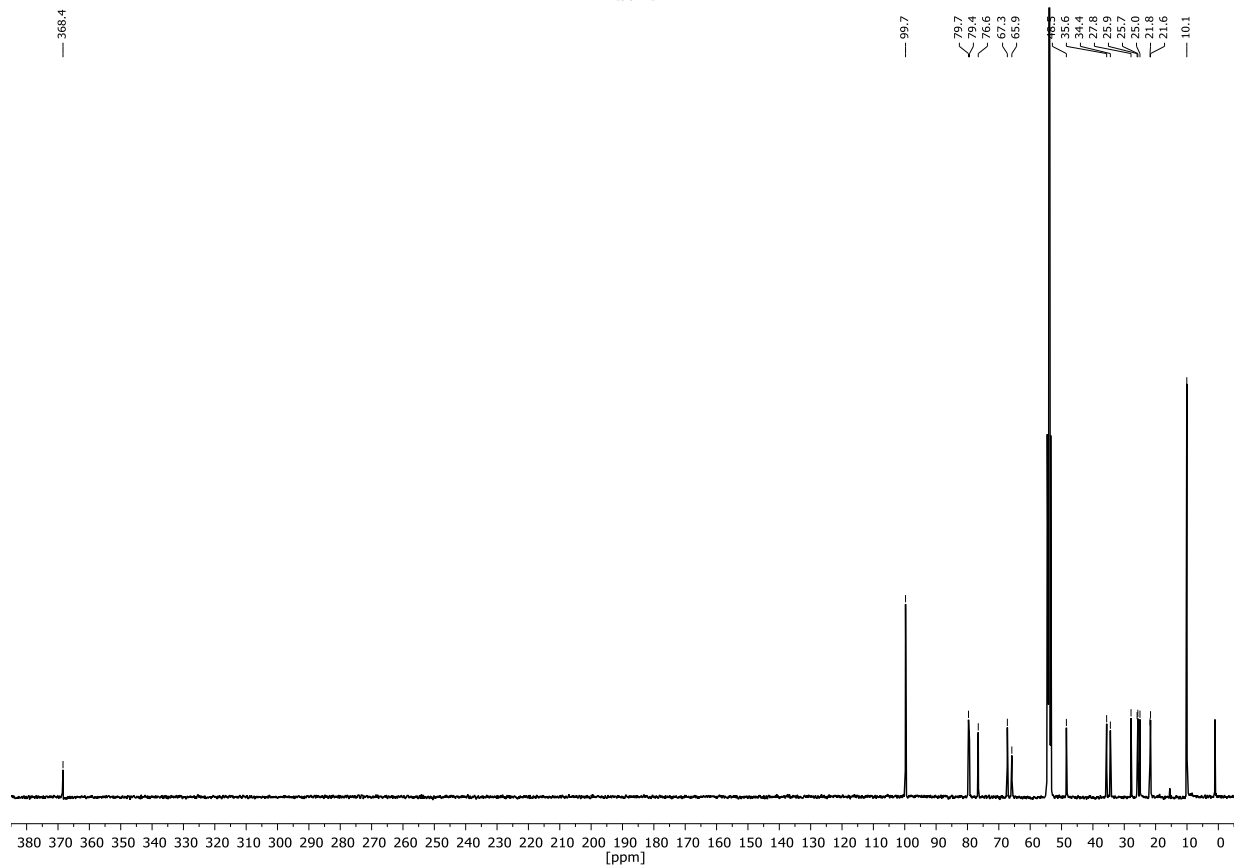

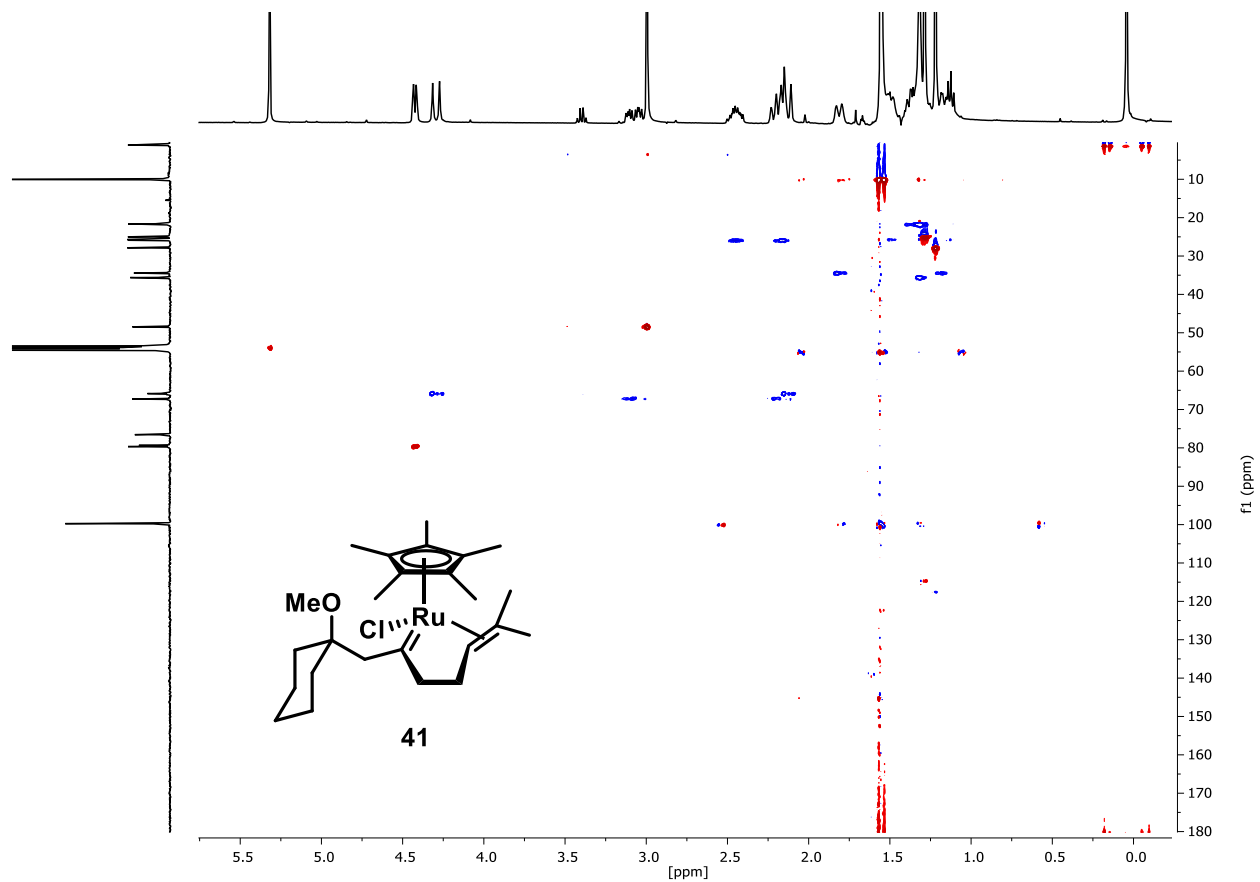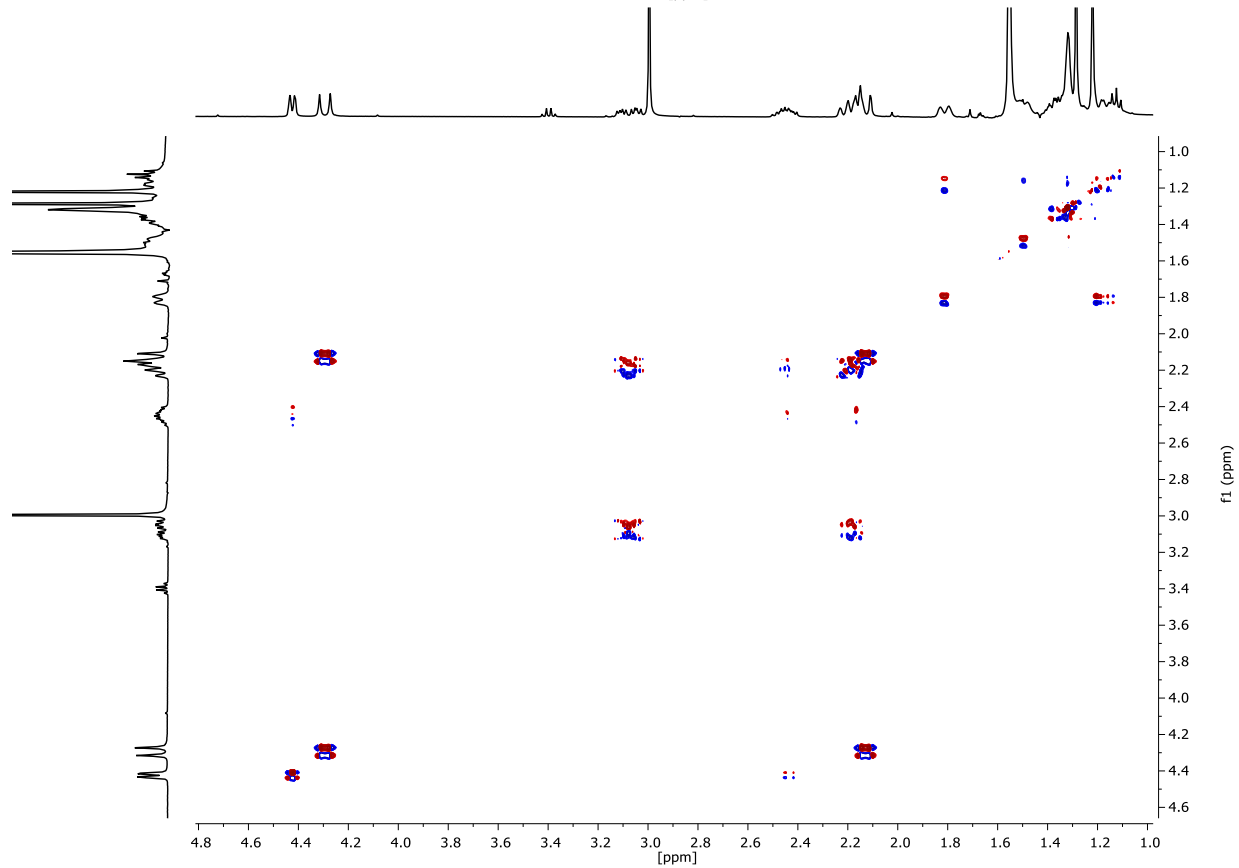

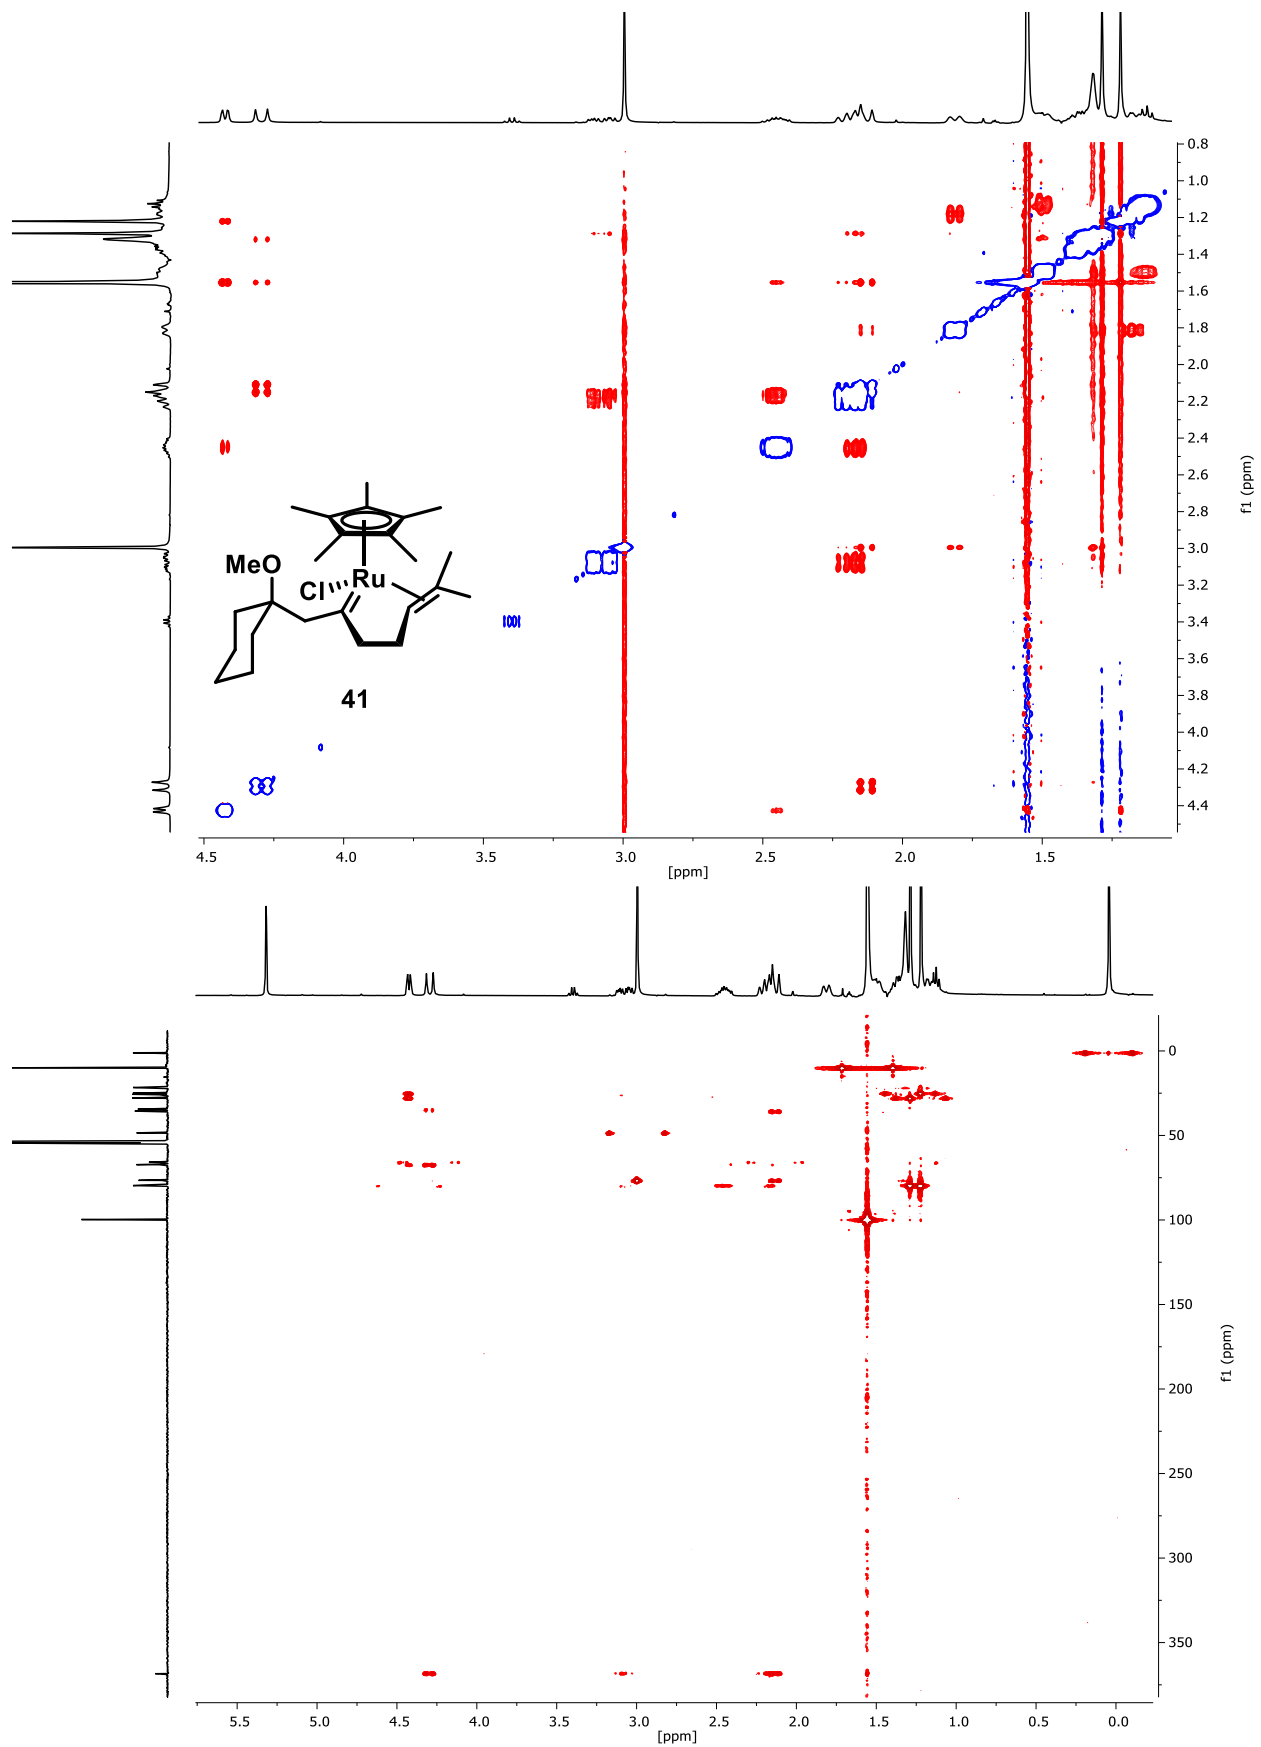

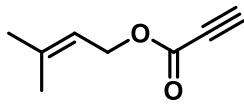

S16

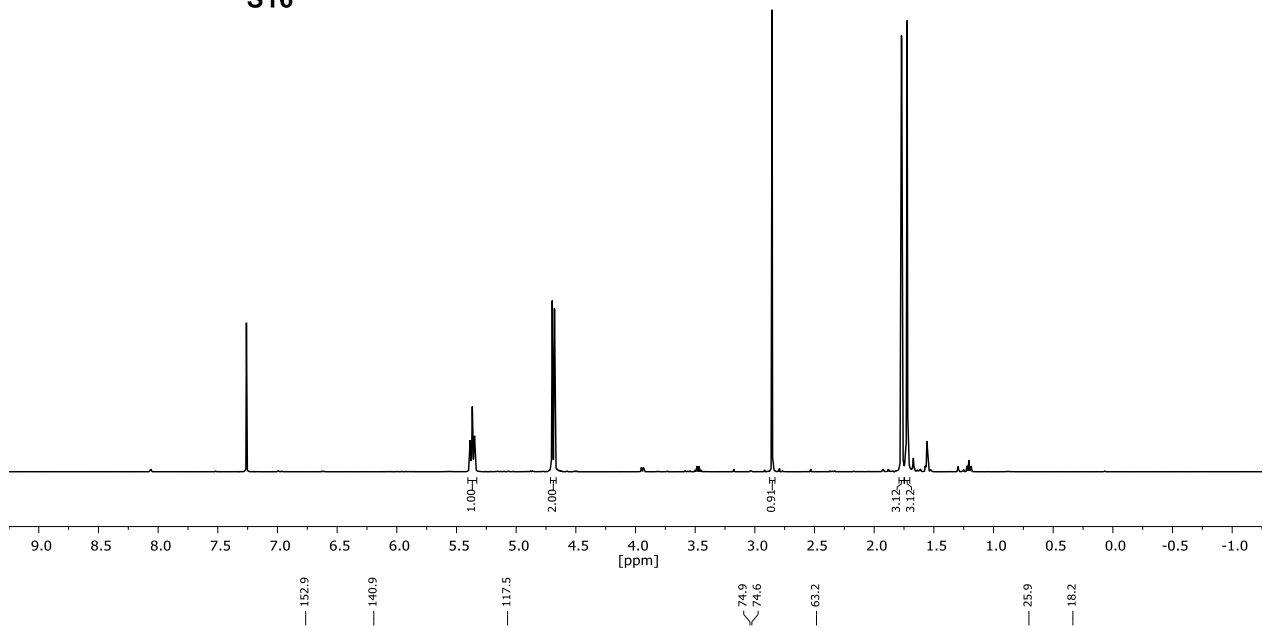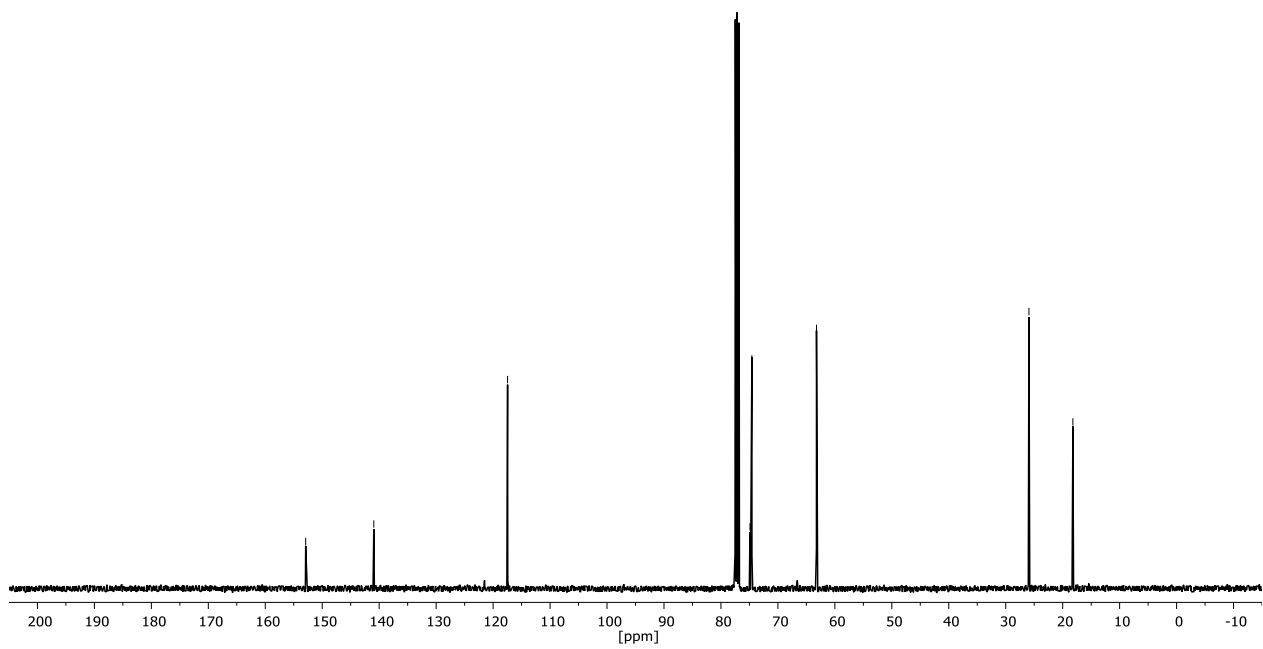

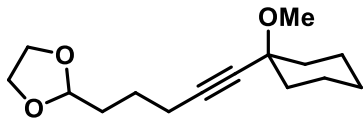

S21

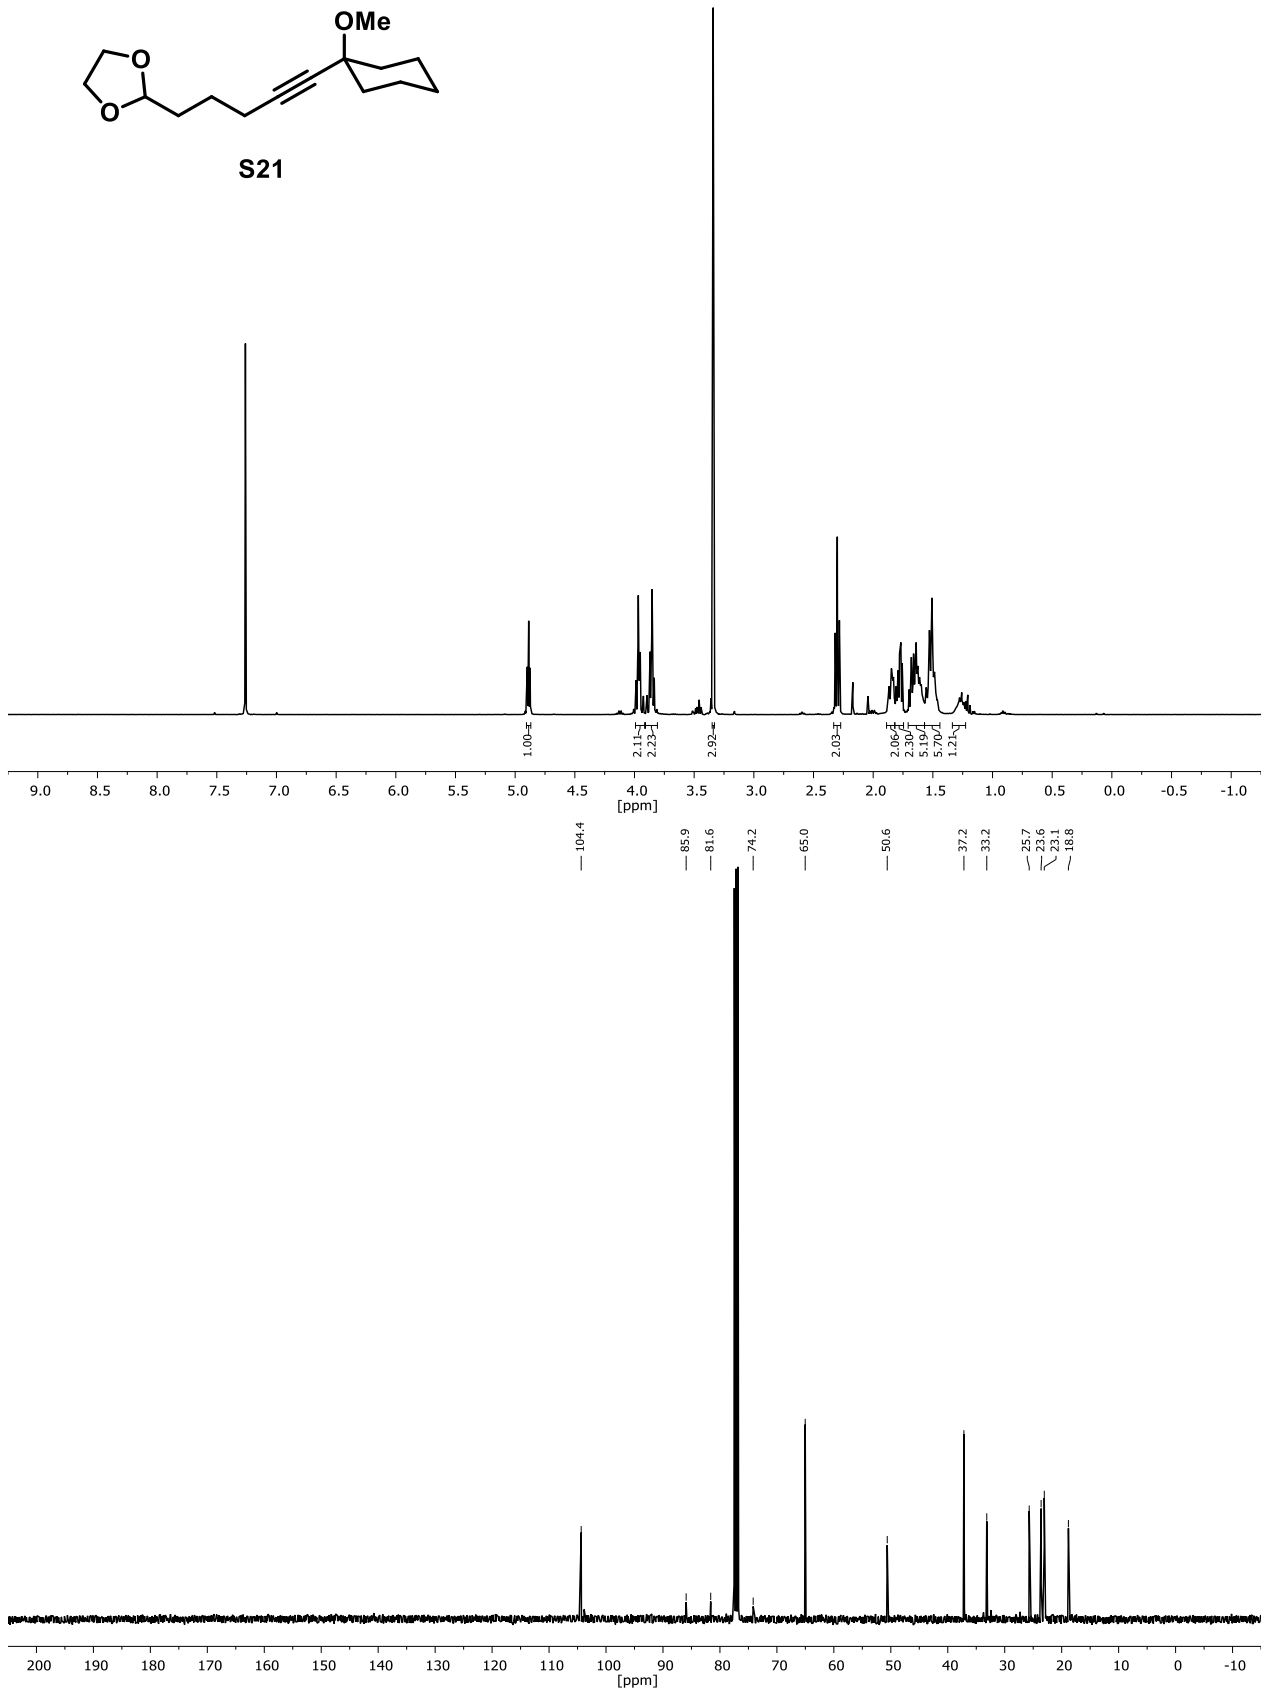



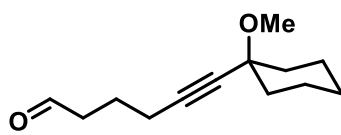

S22

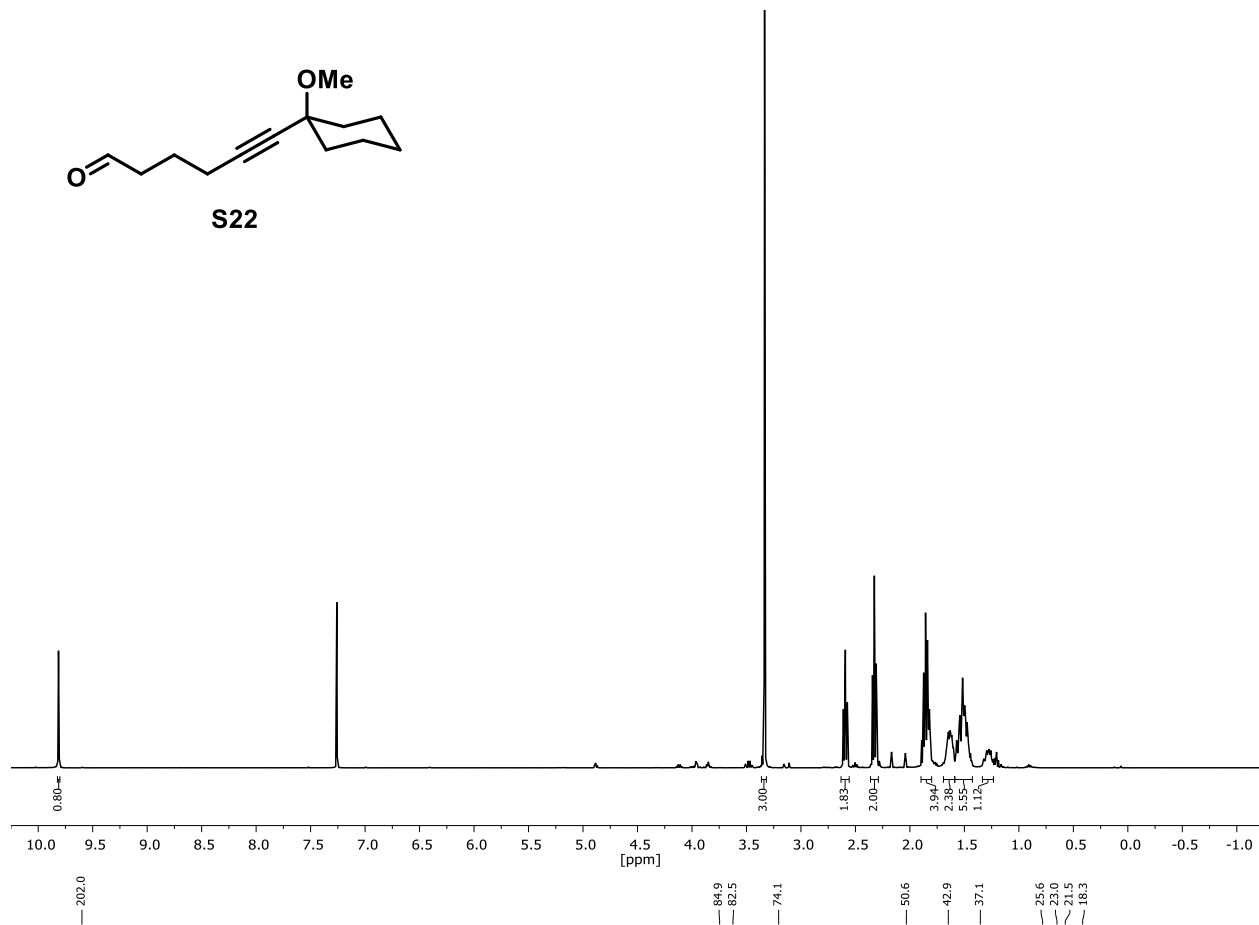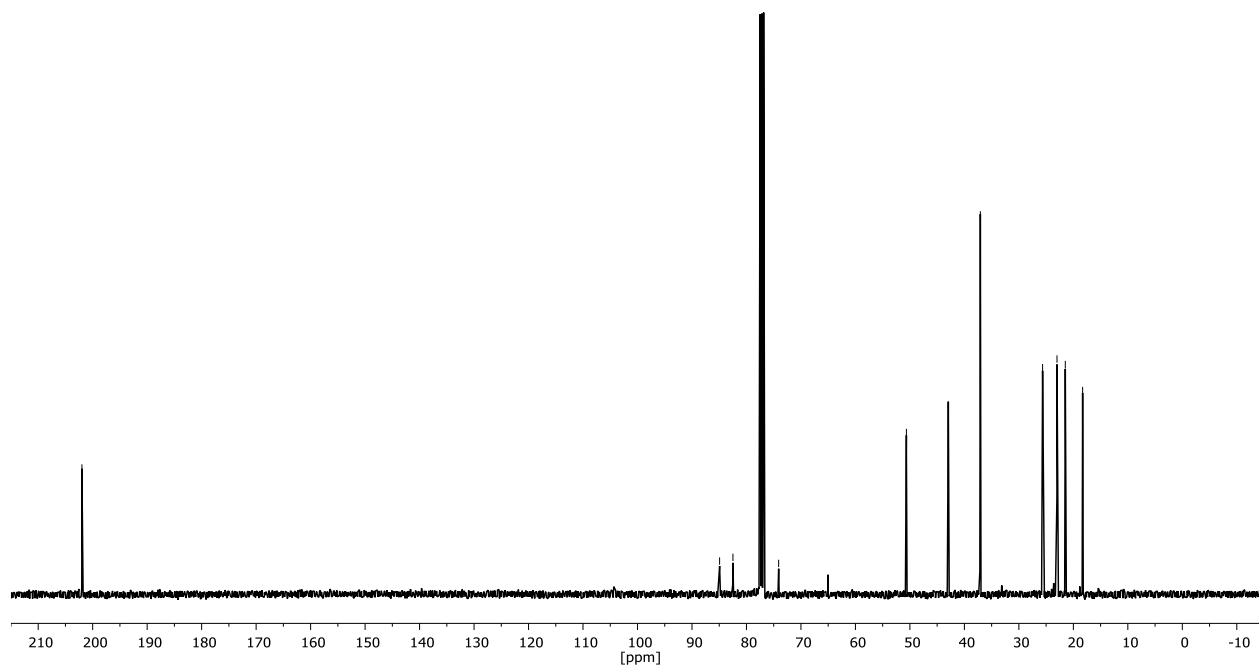

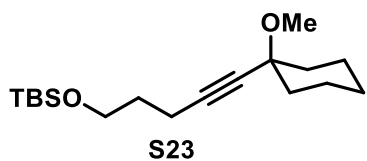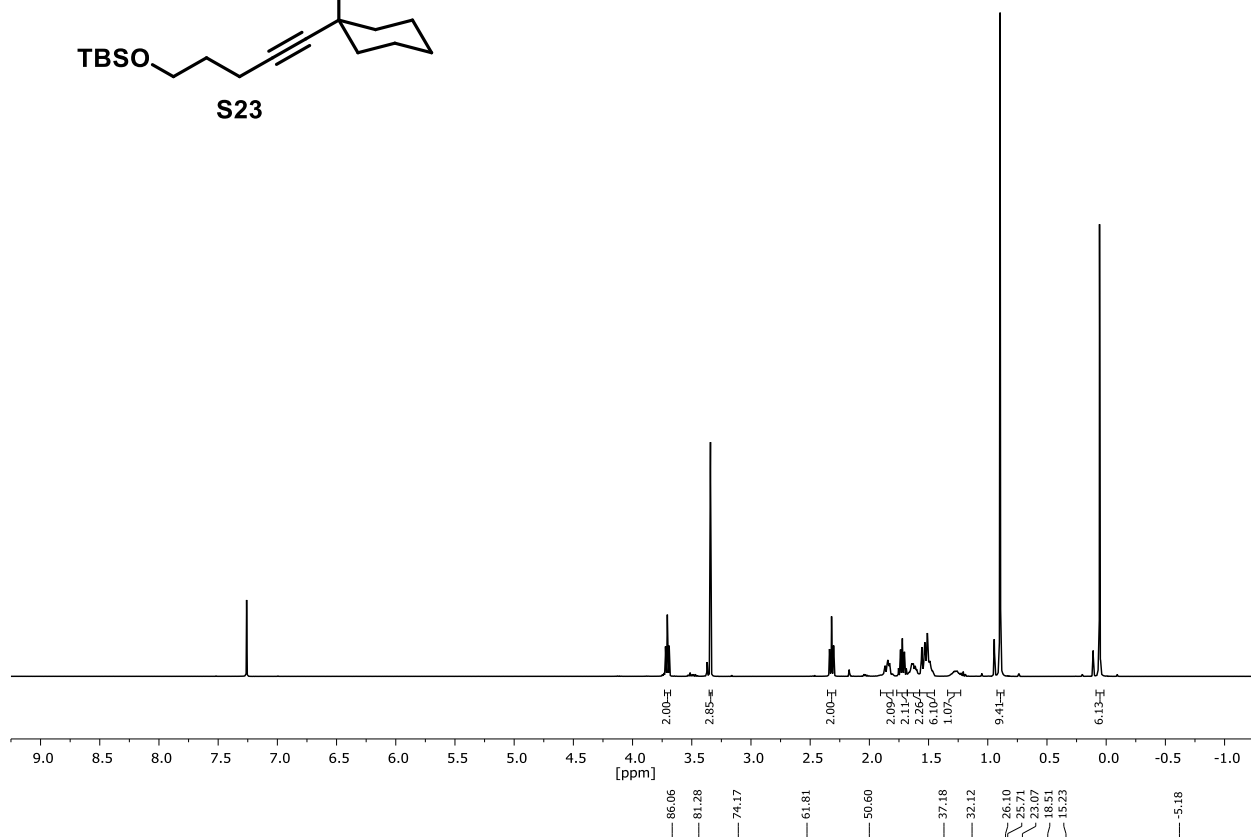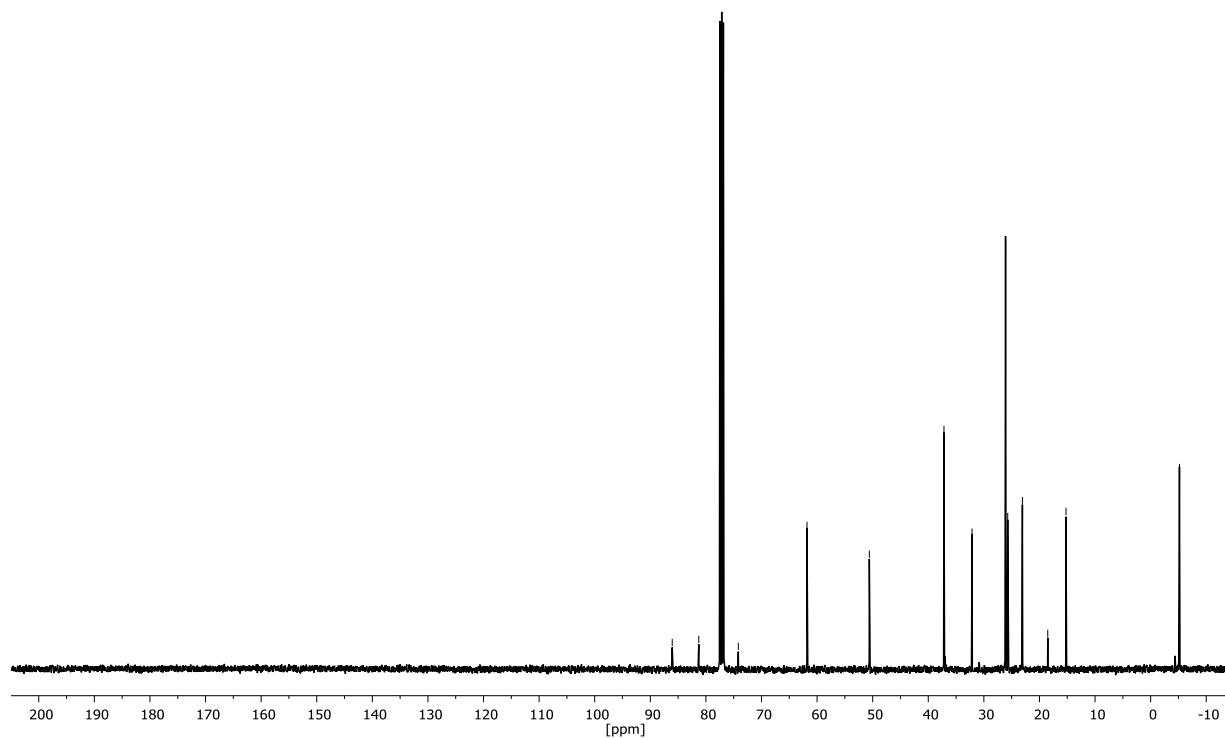

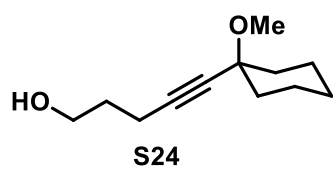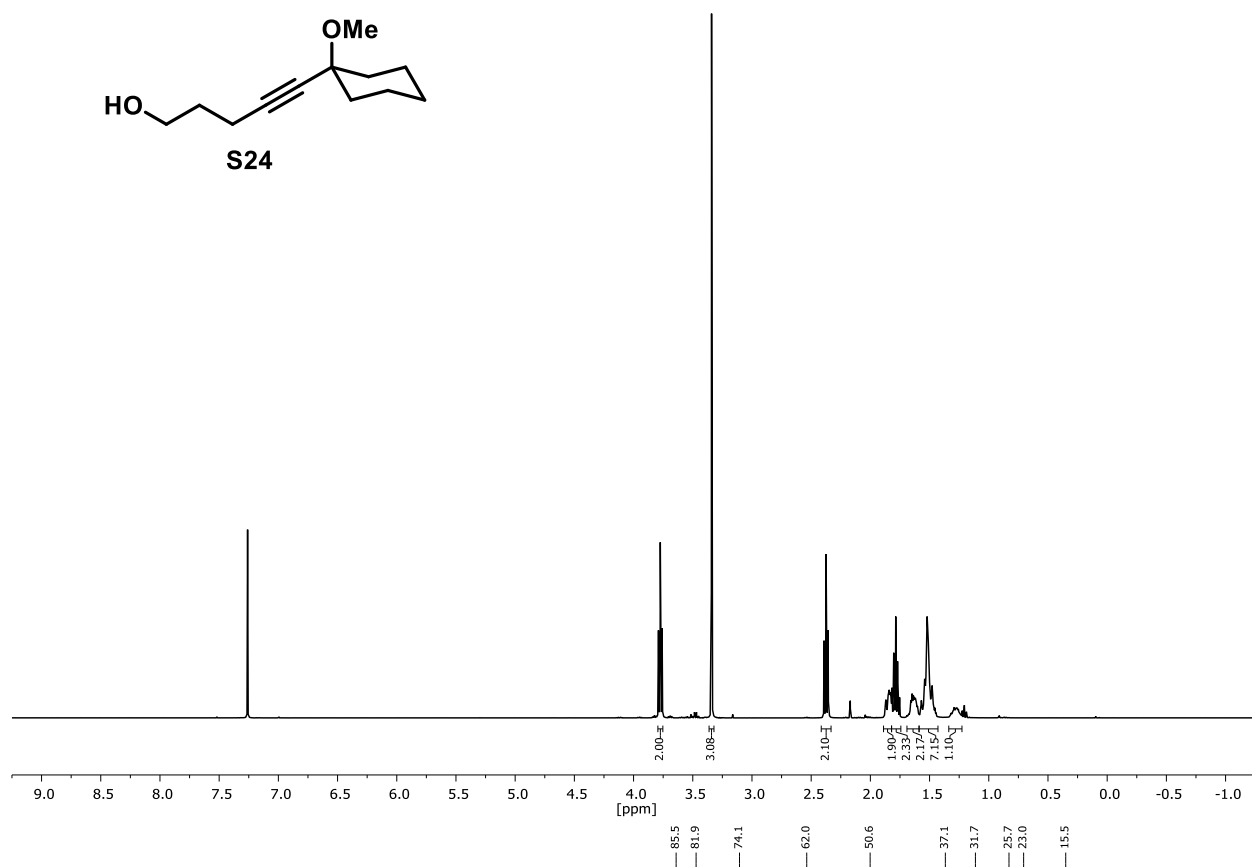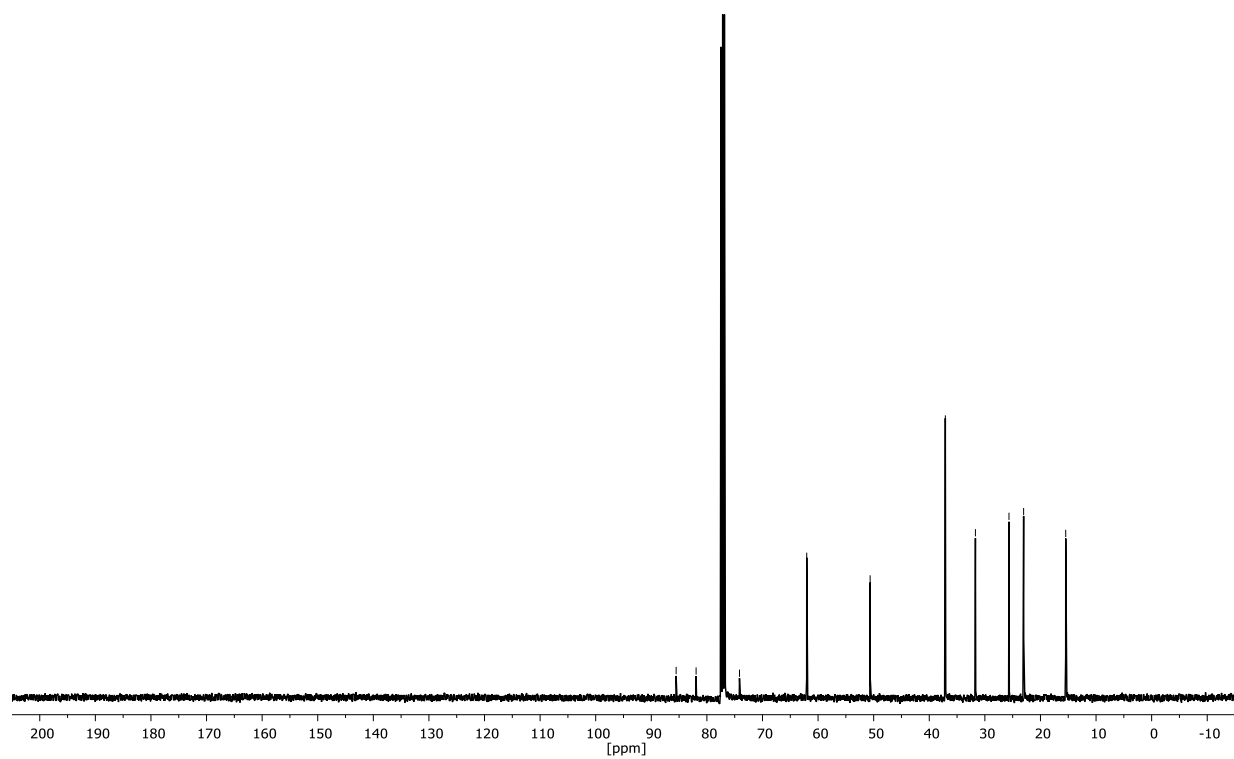

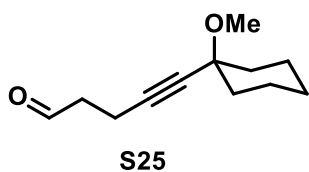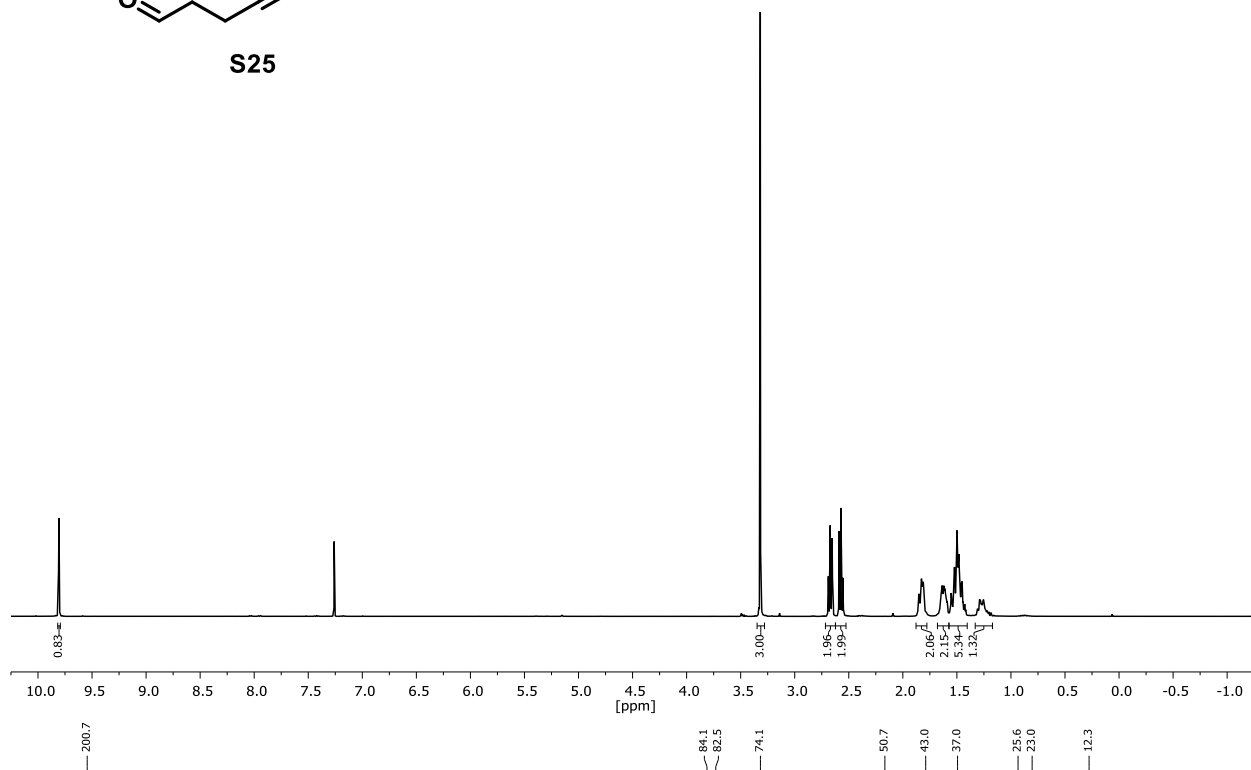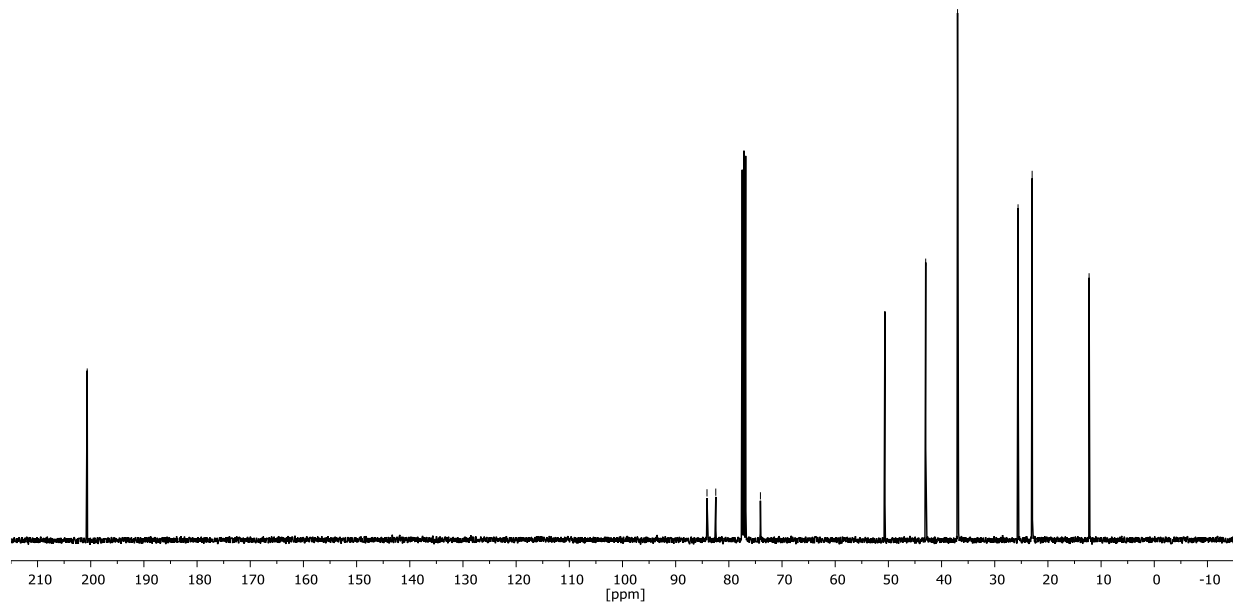

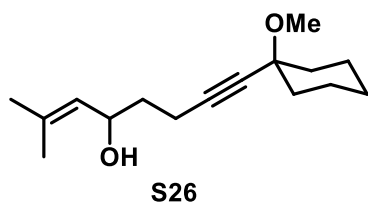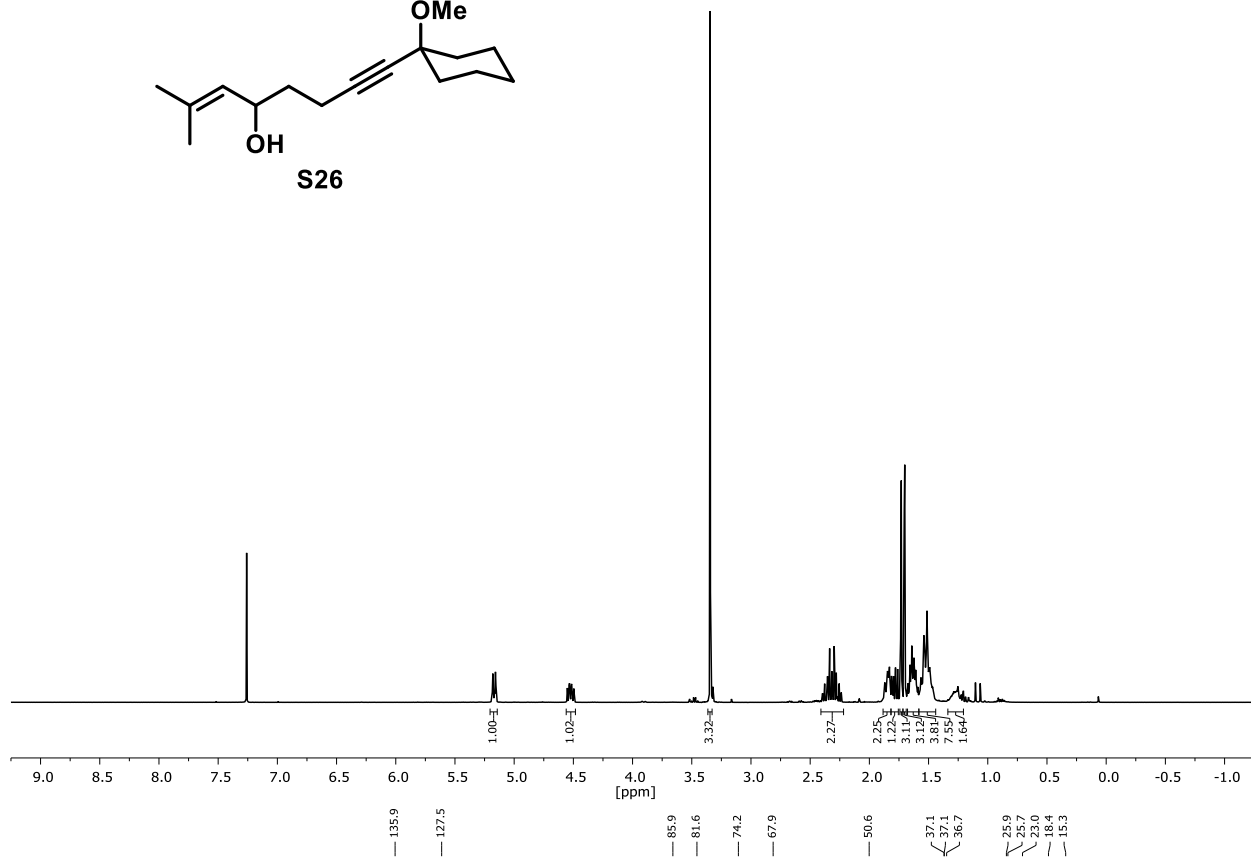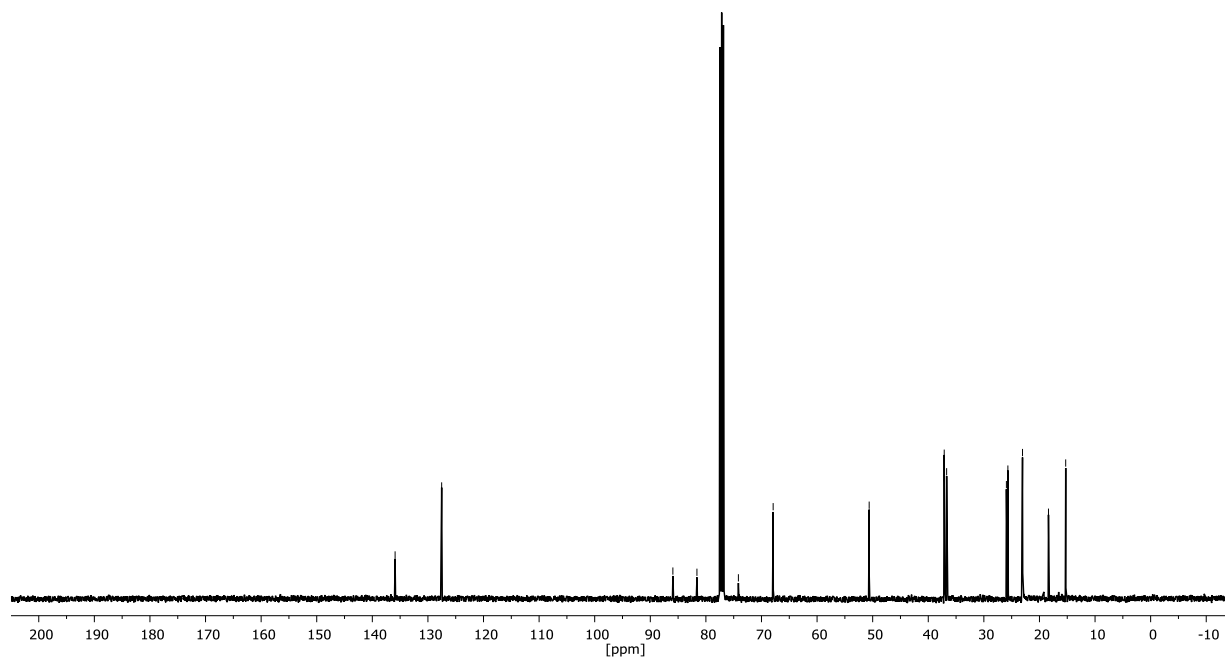

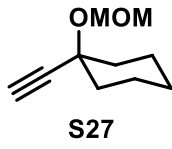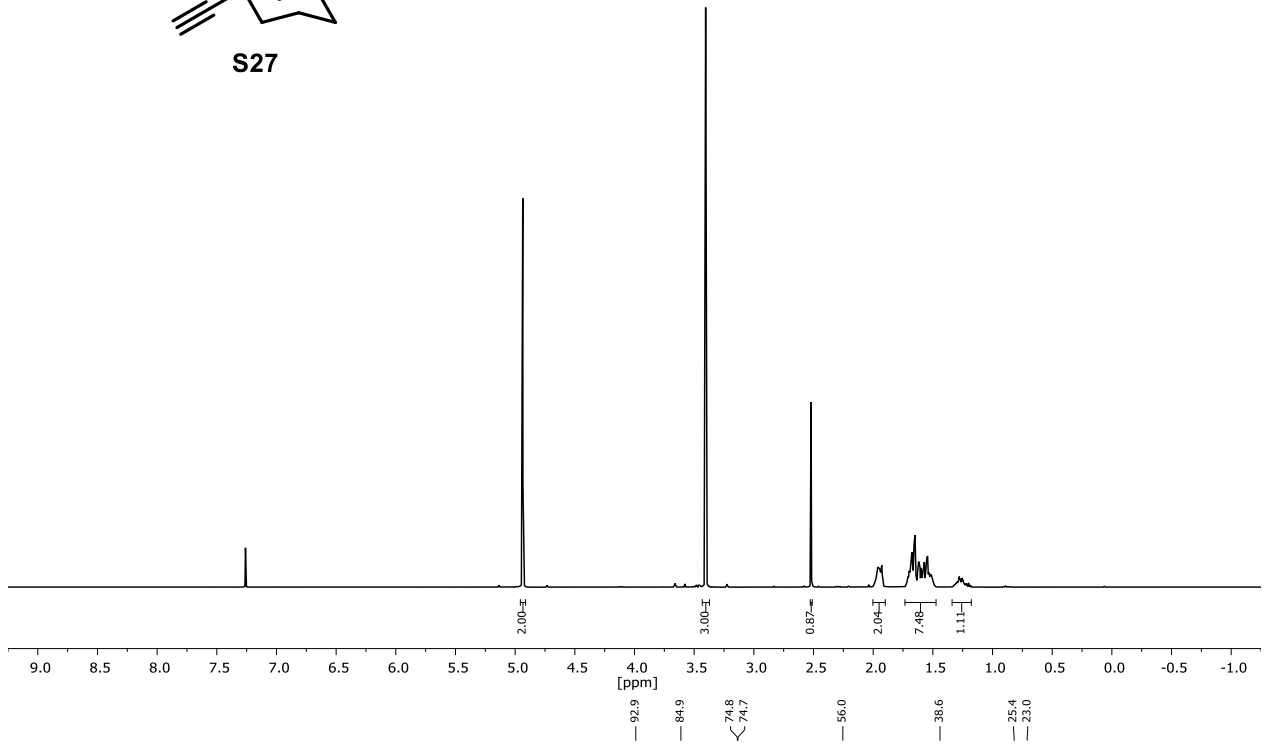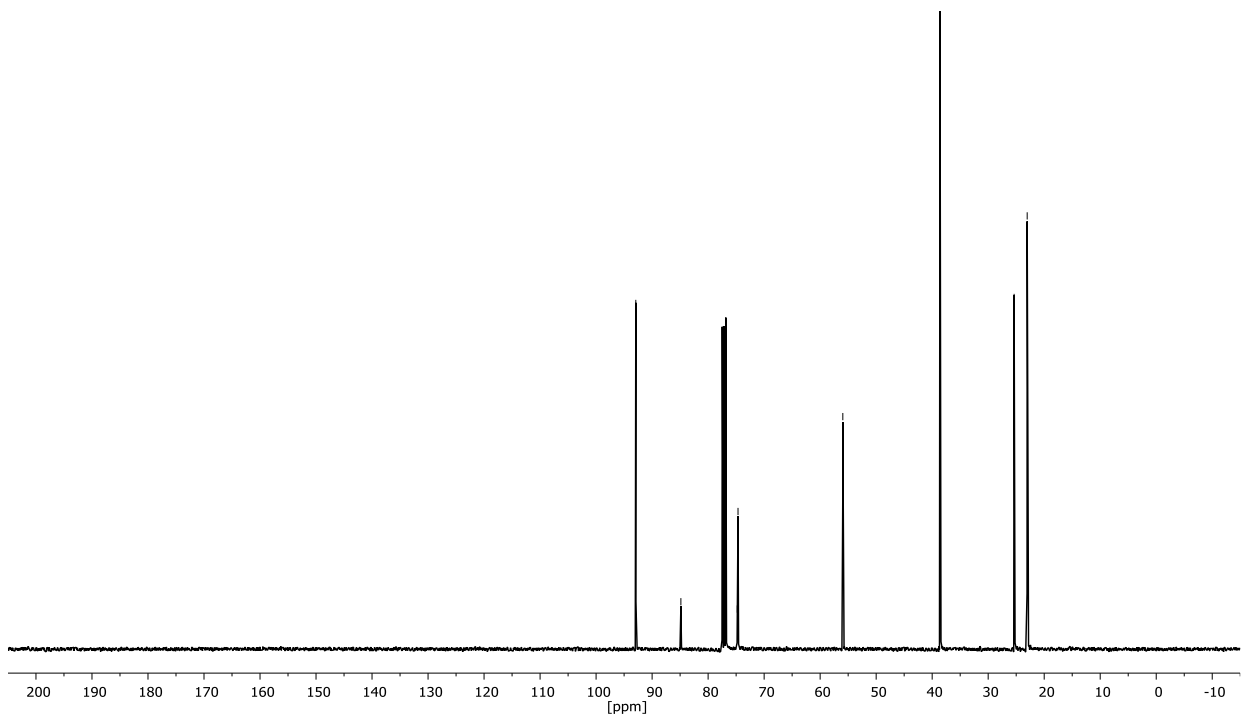

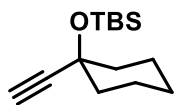

S28

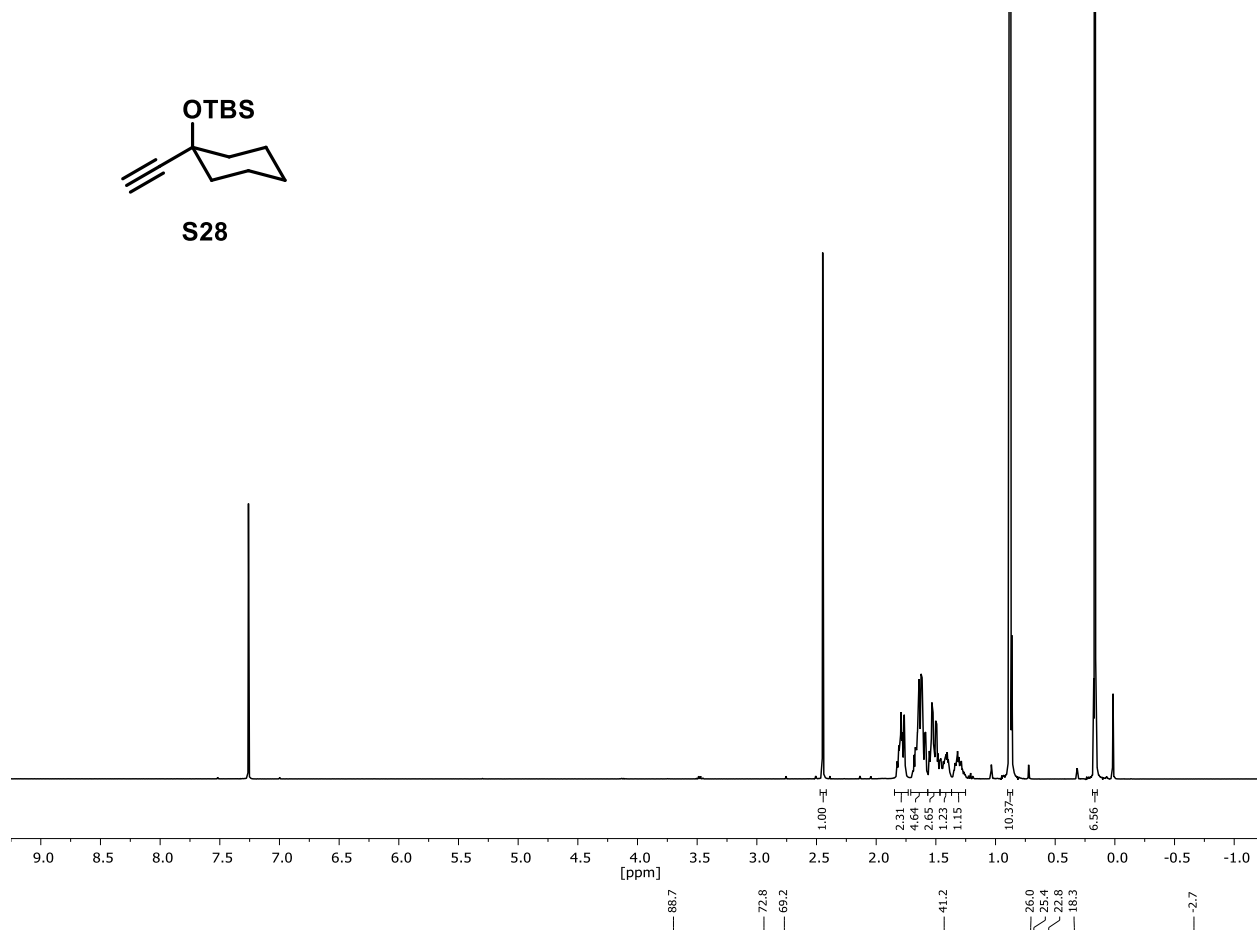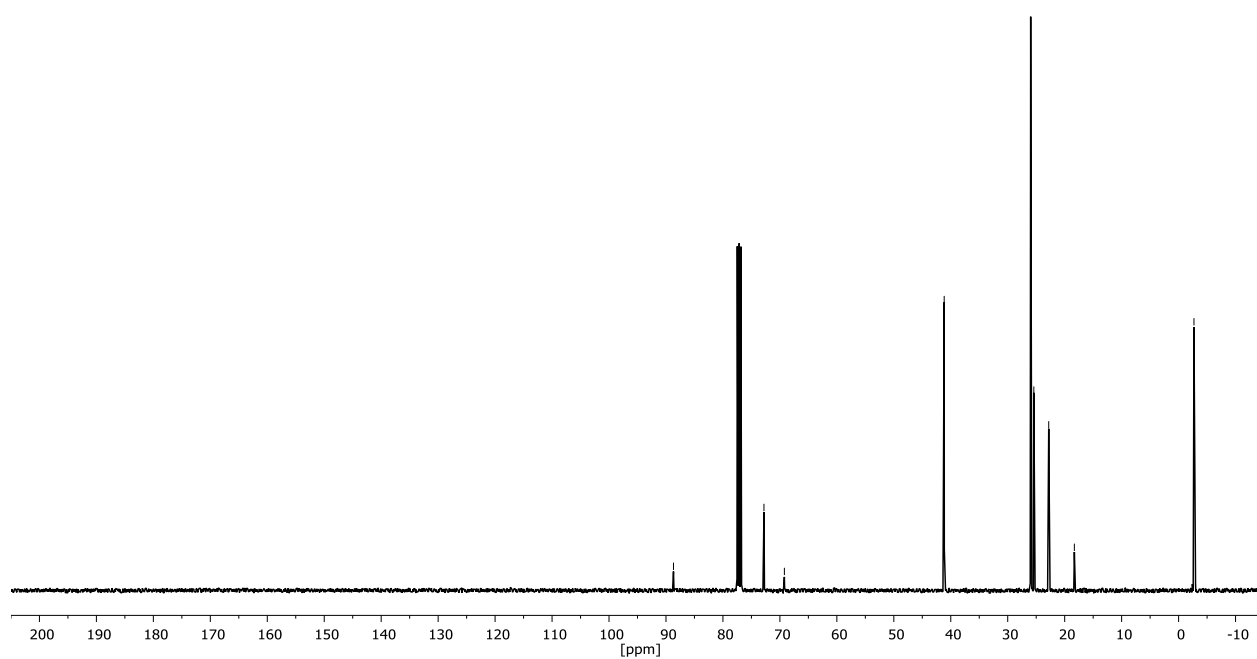

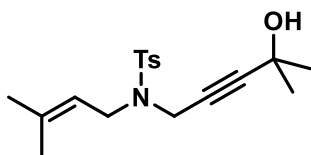

S29

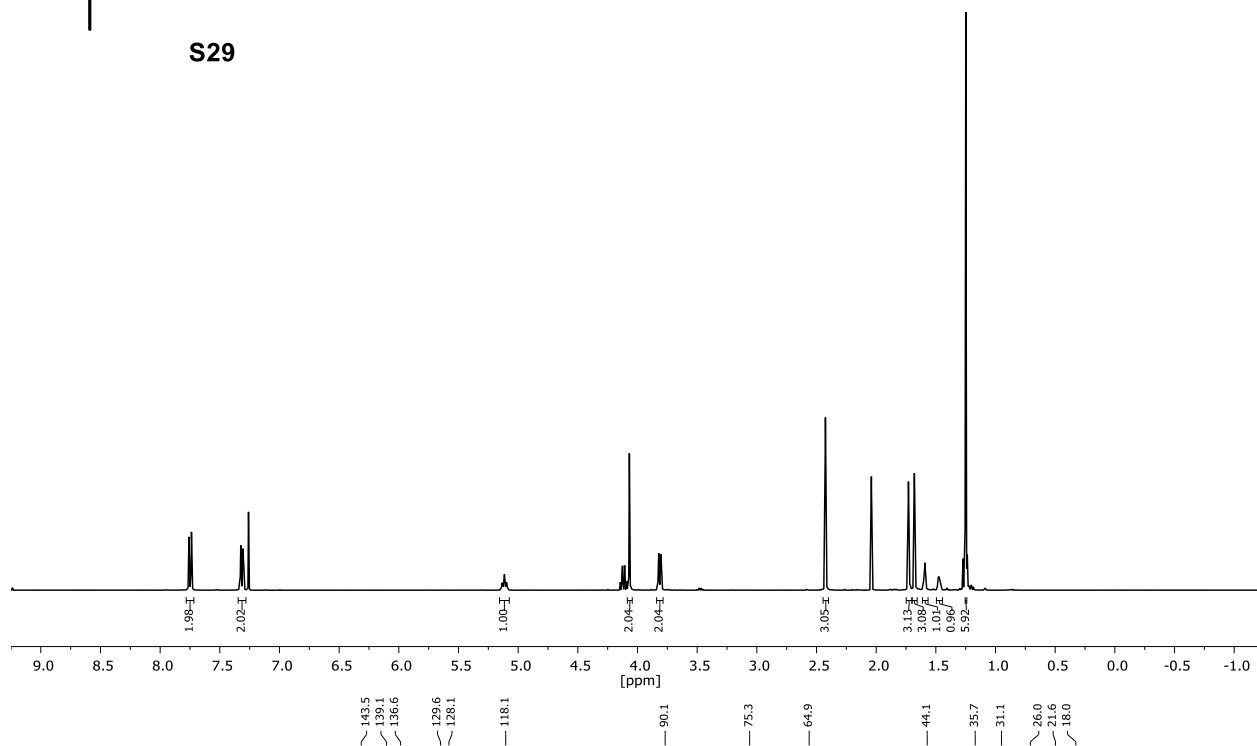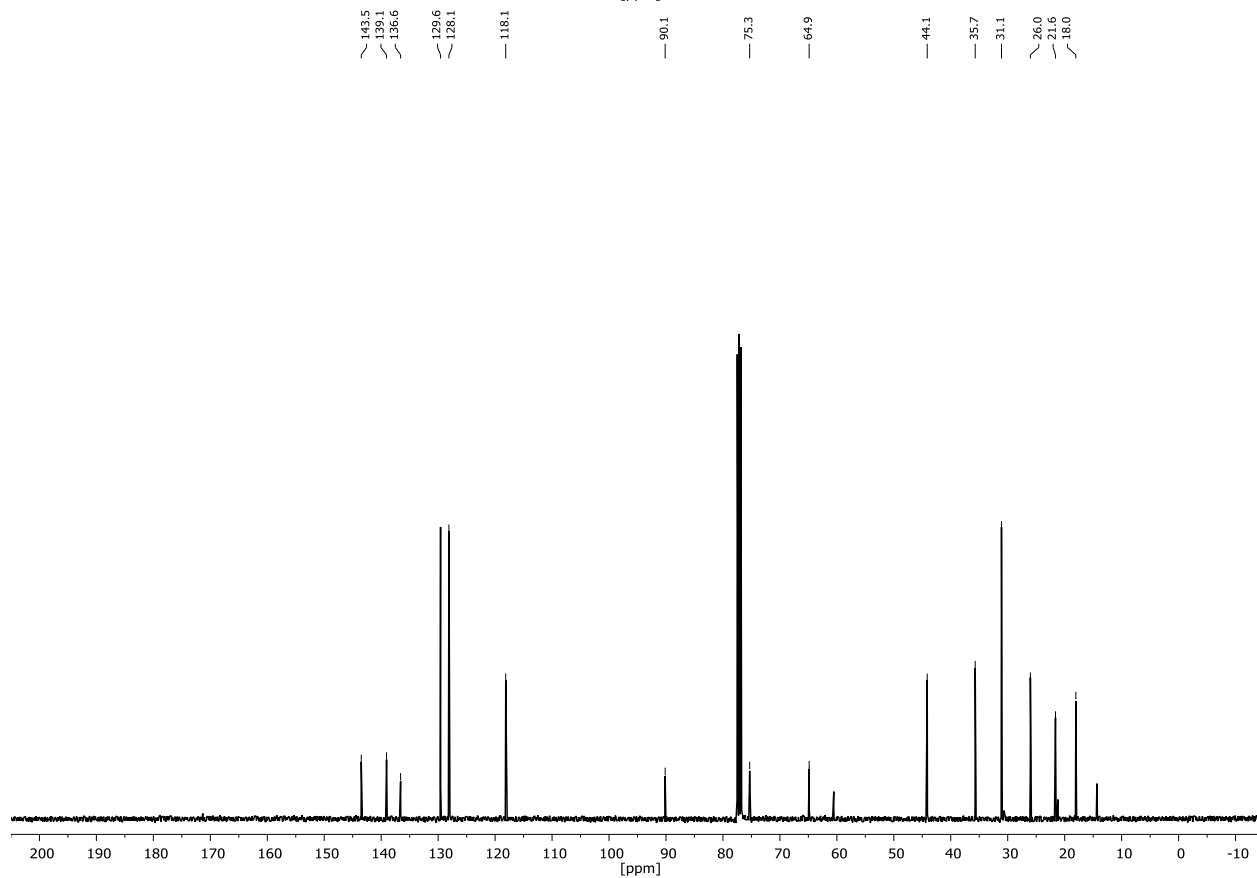



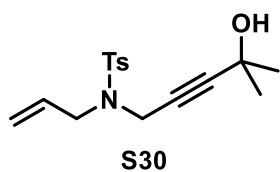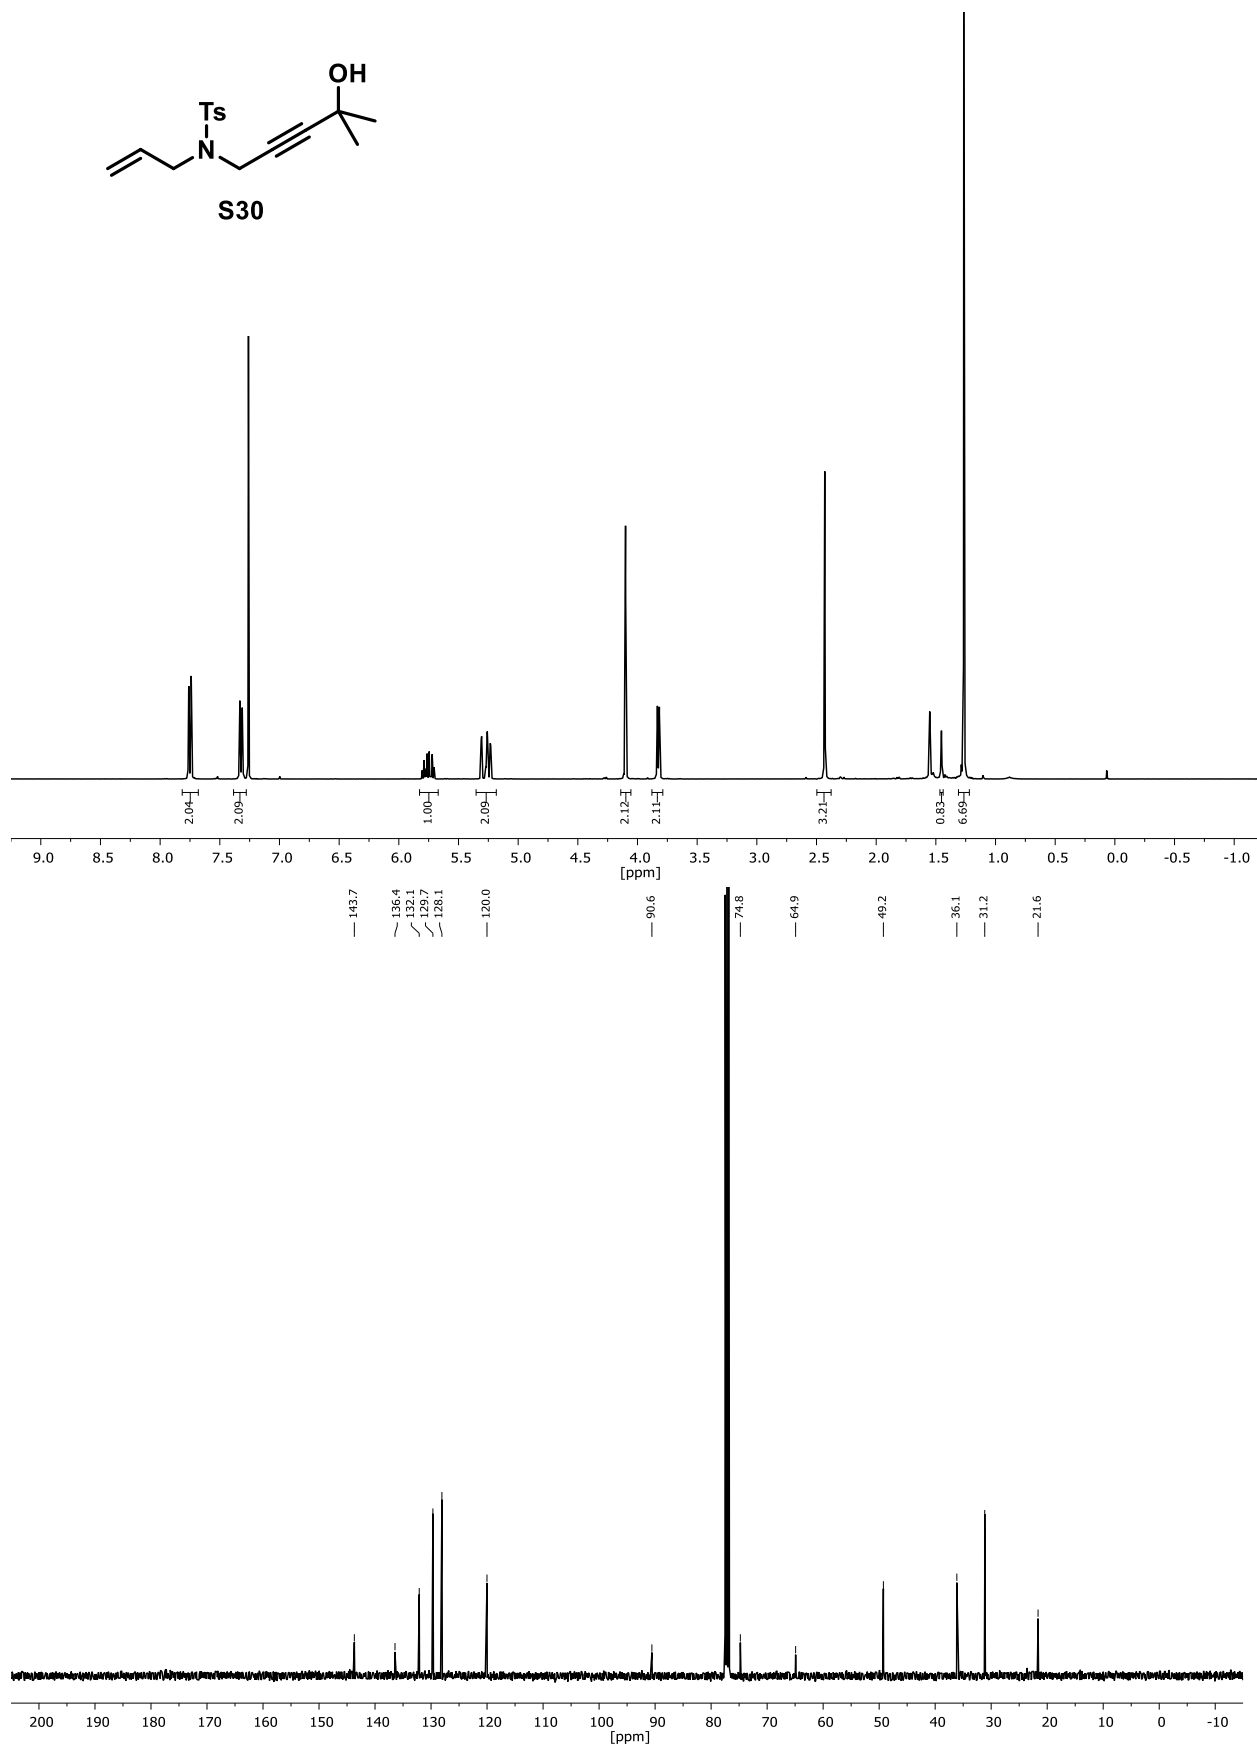

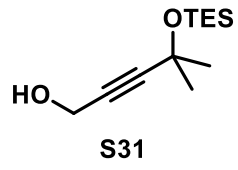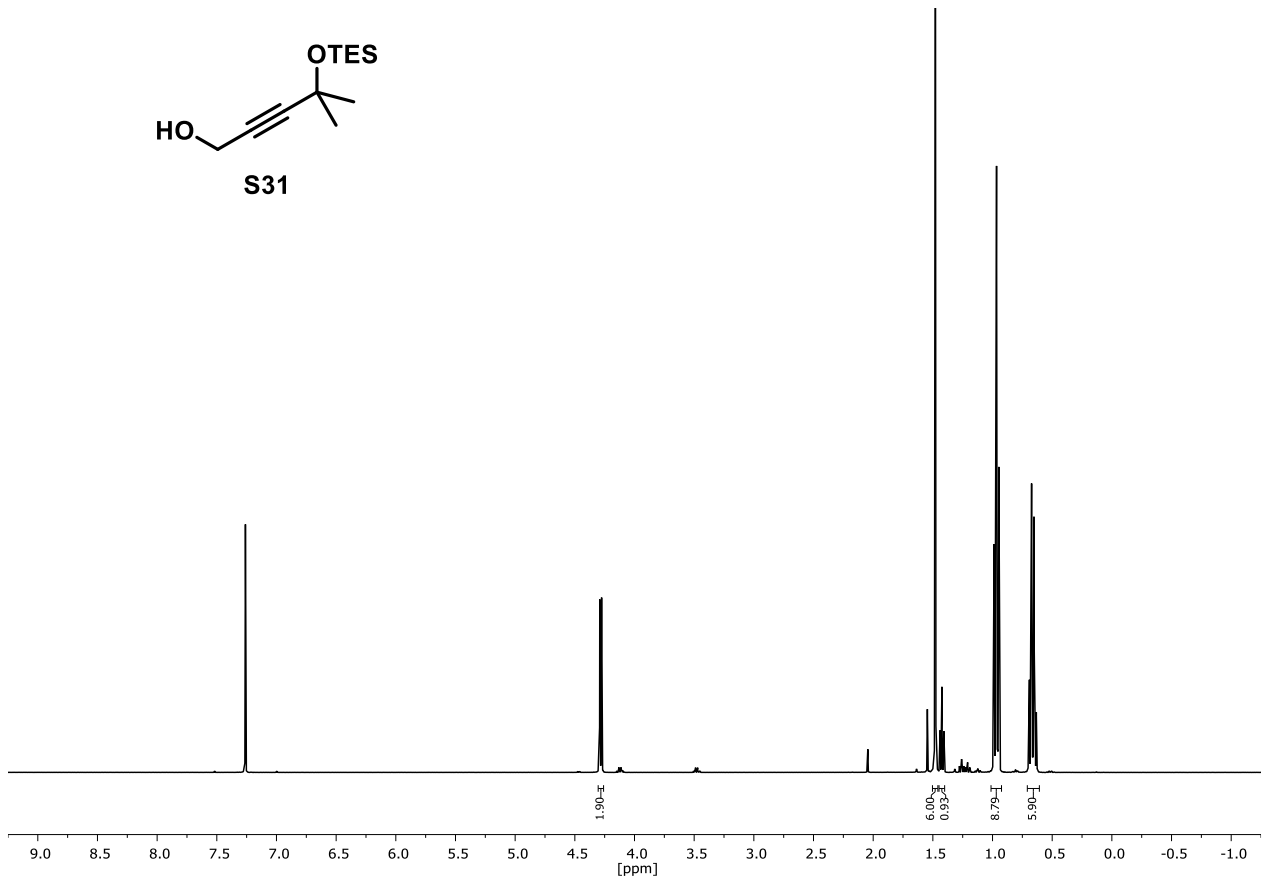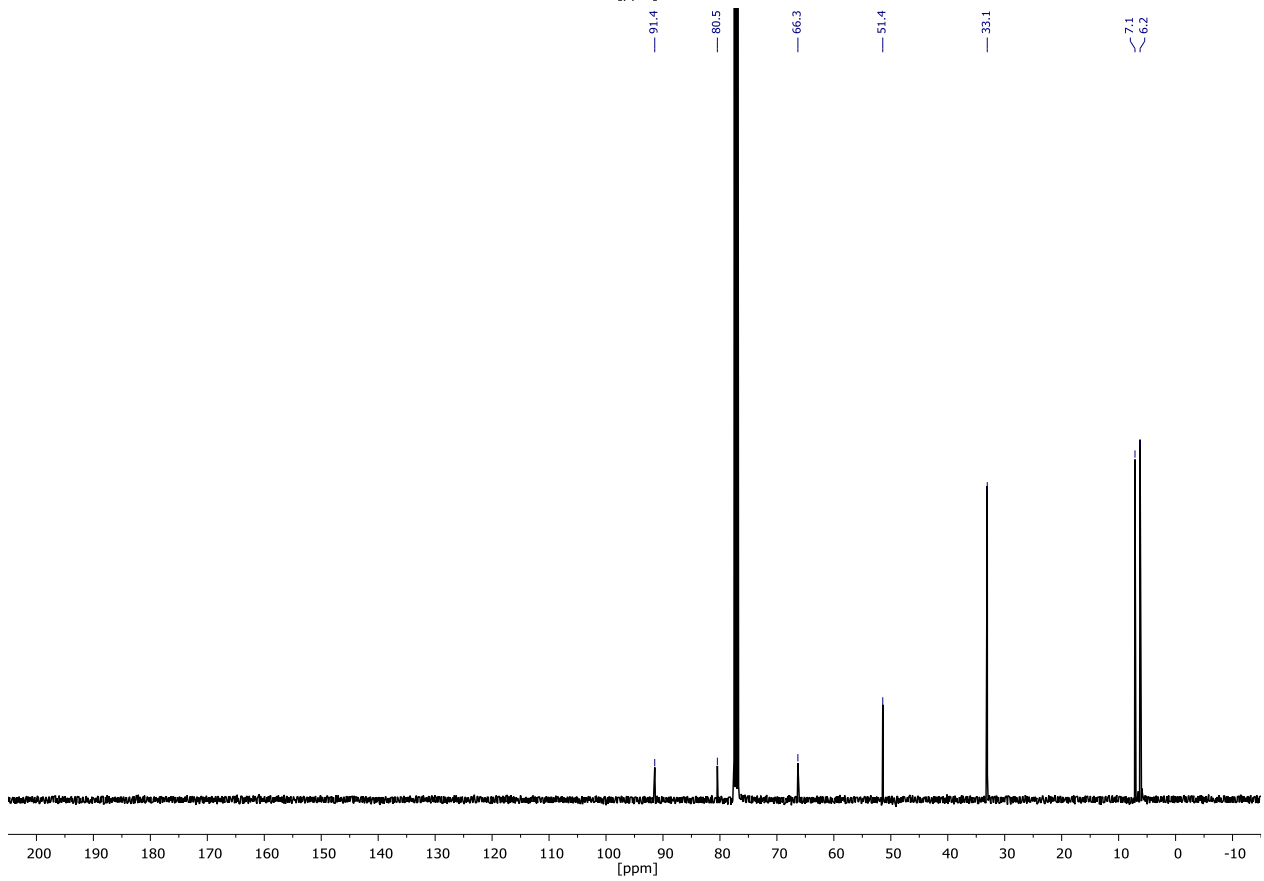

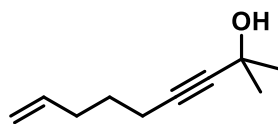

S32

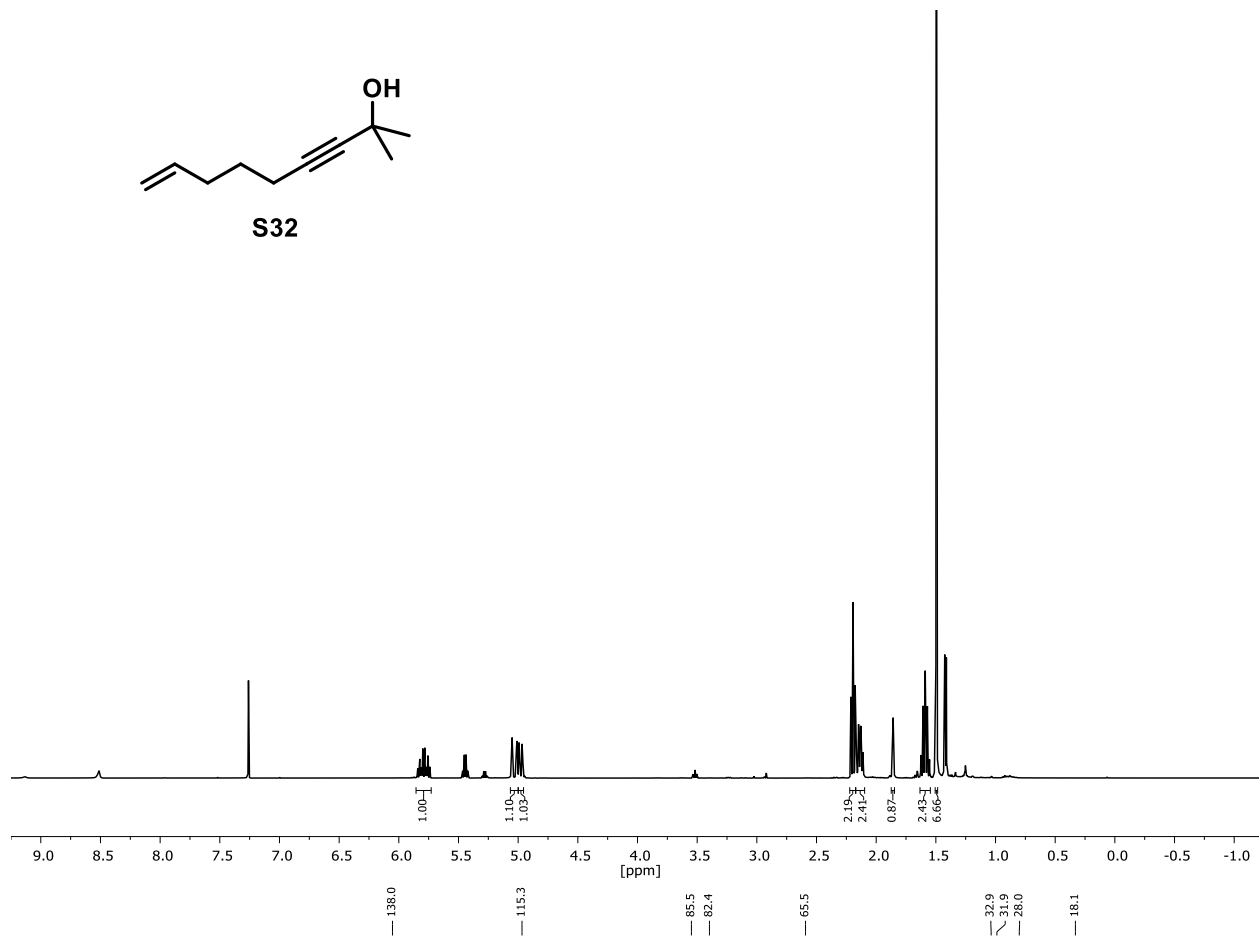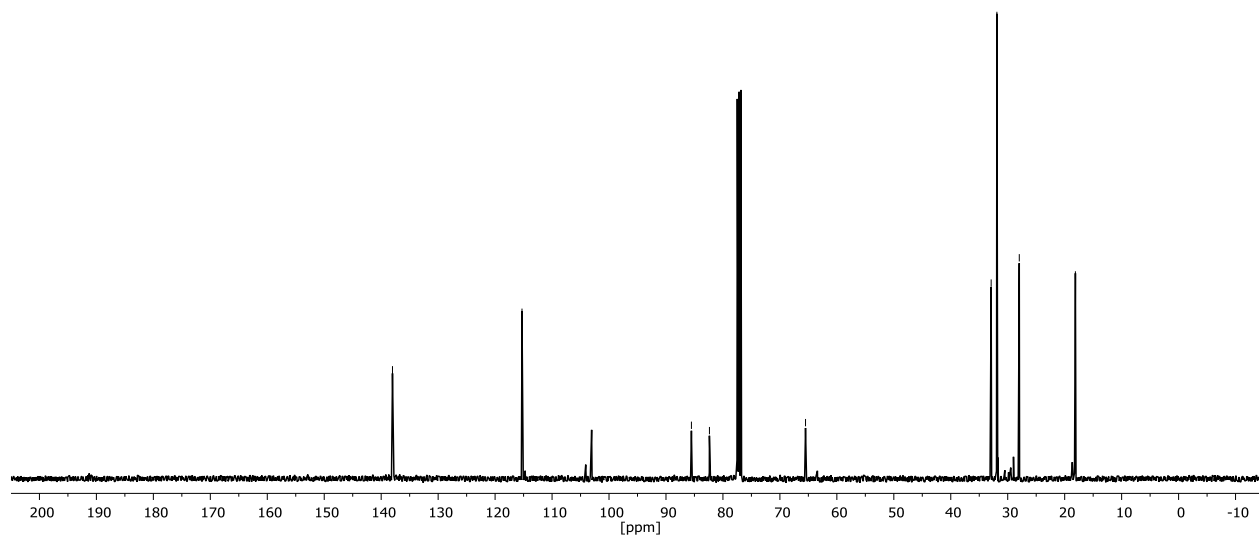

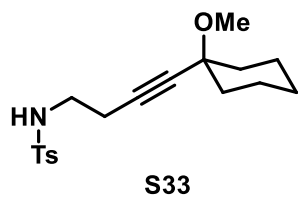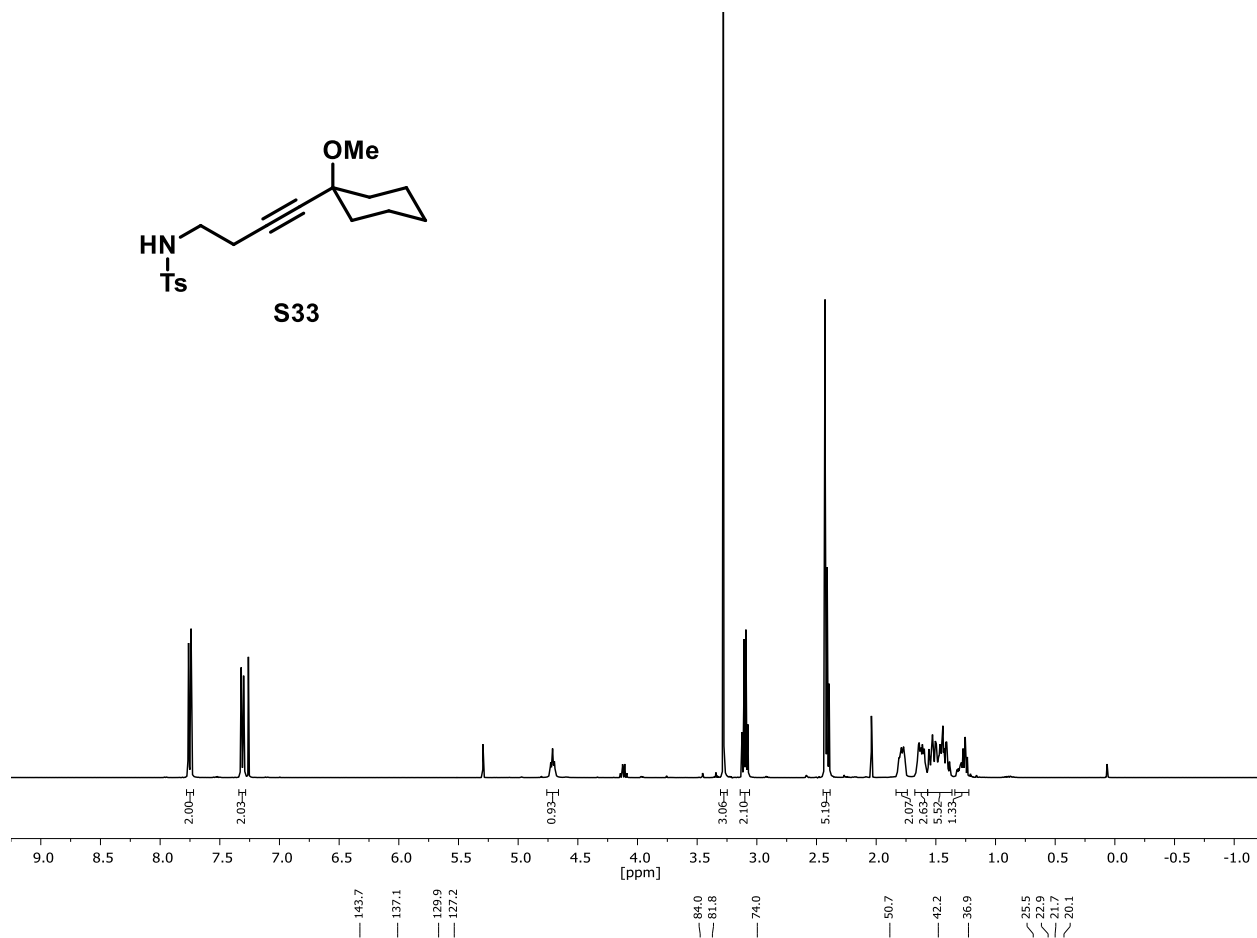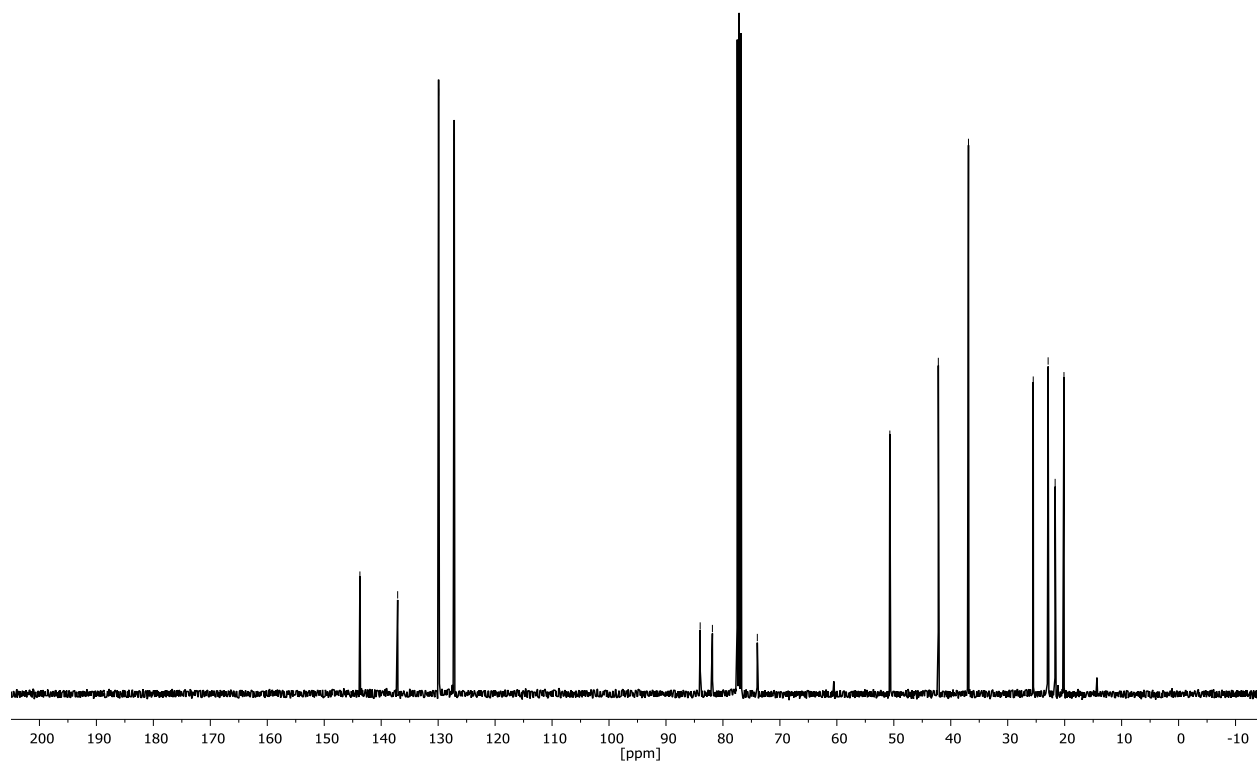

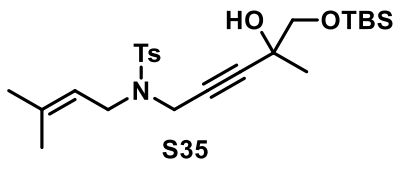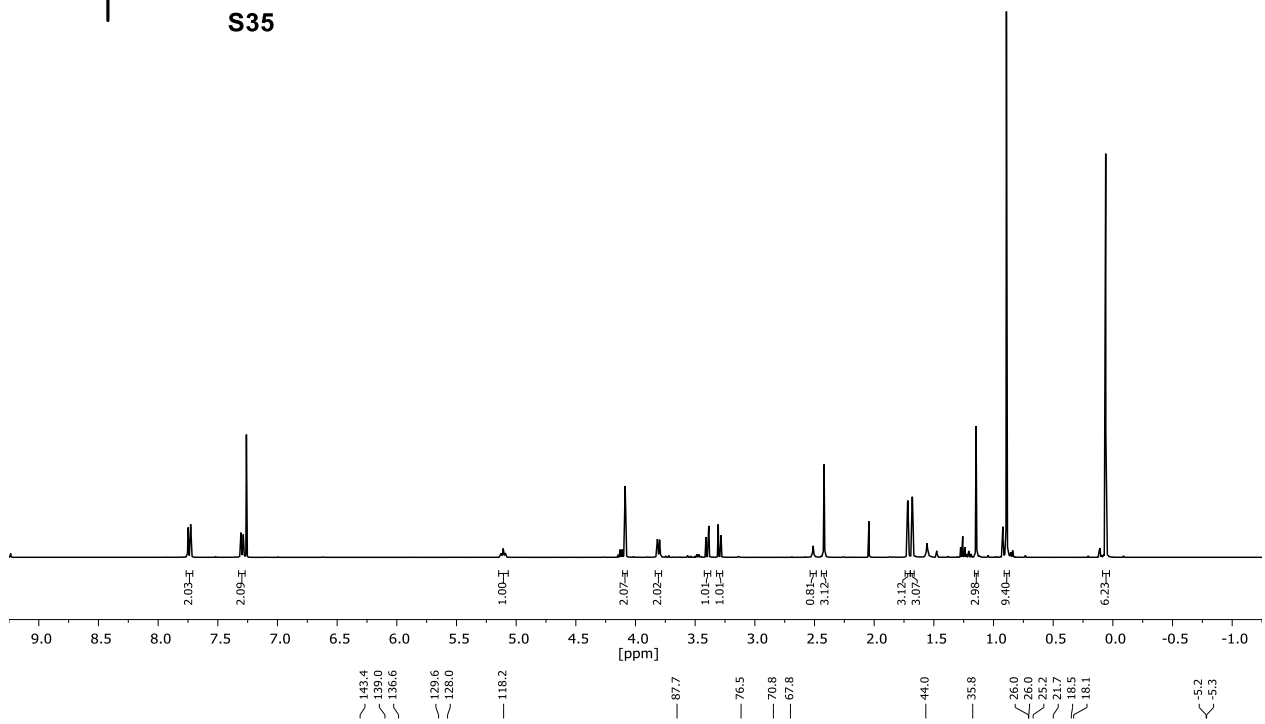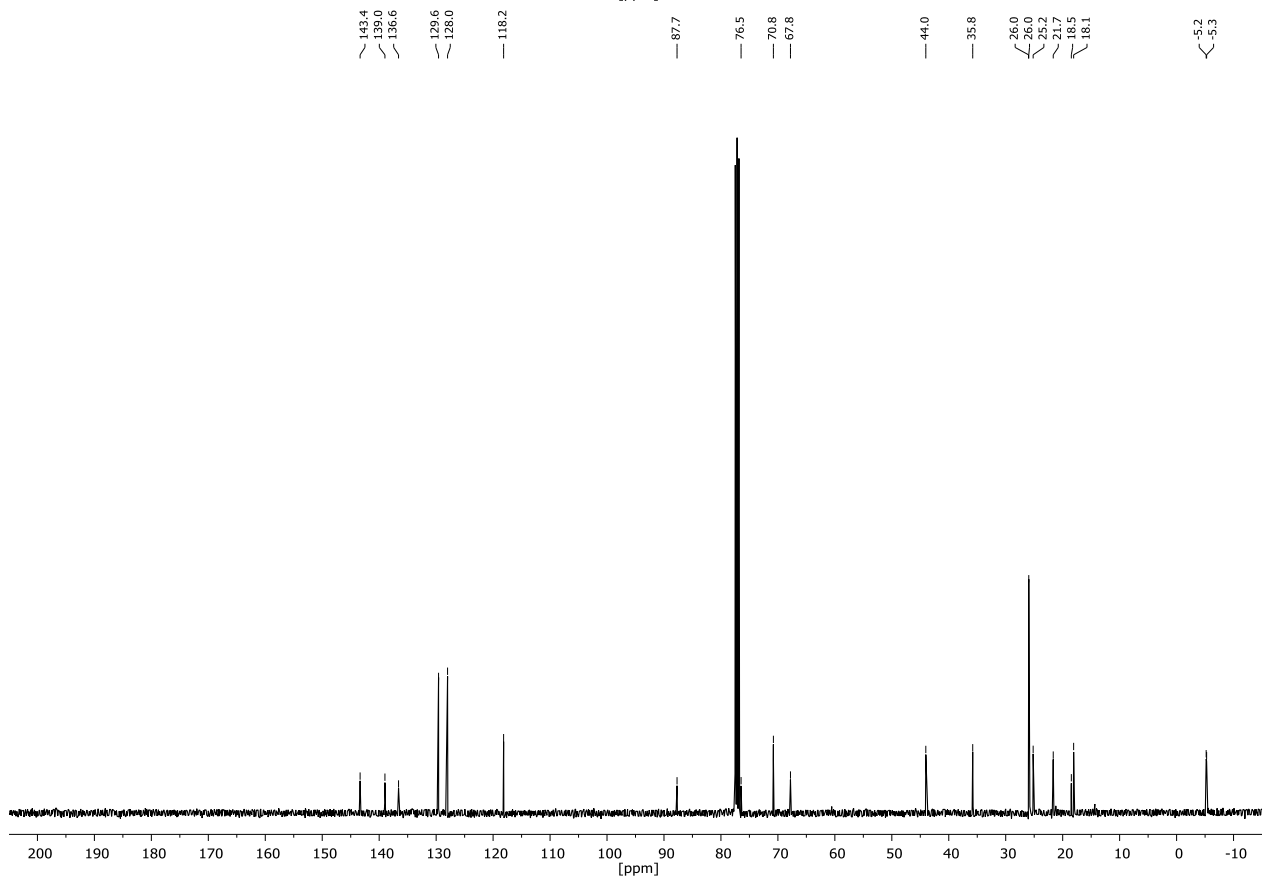

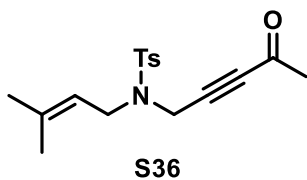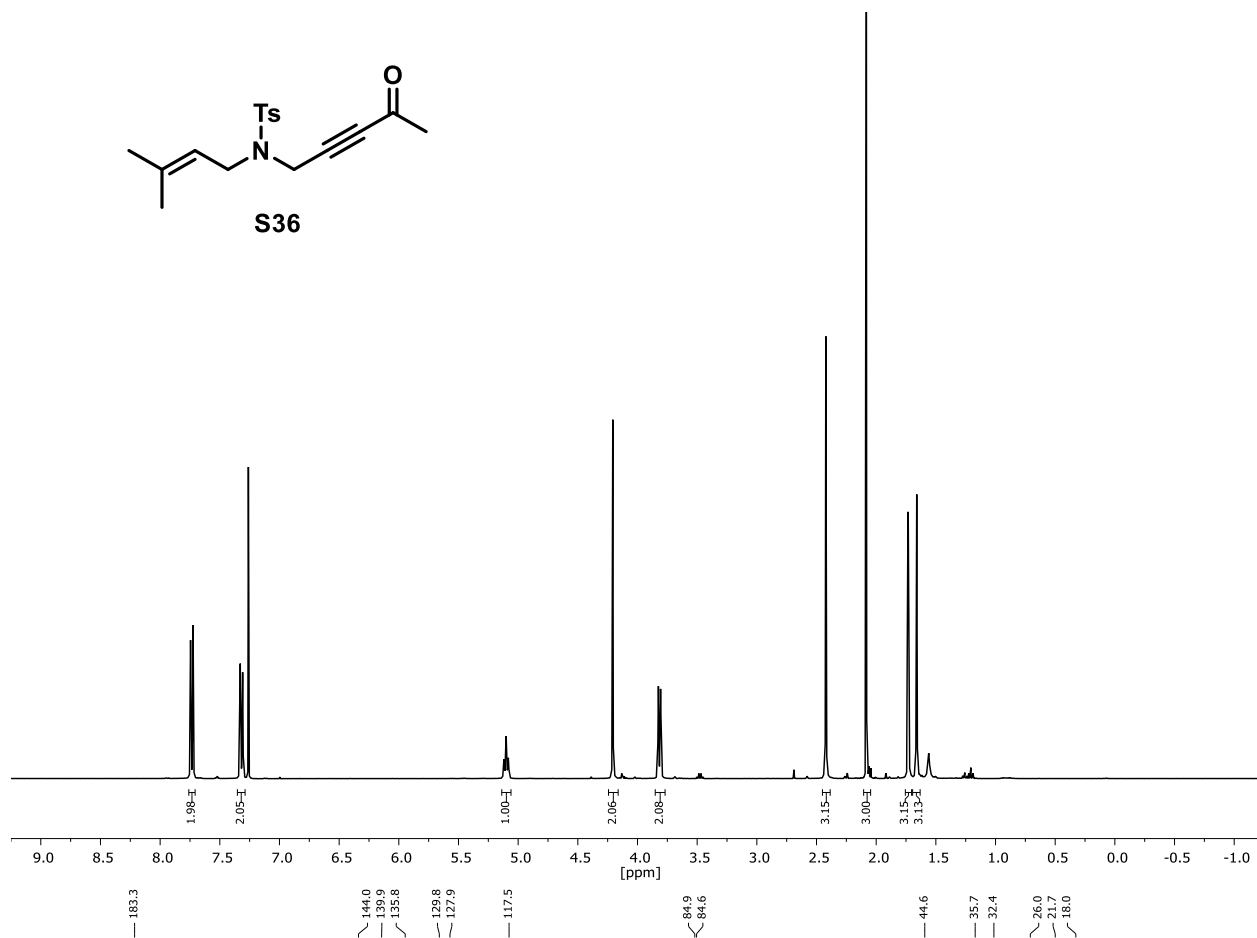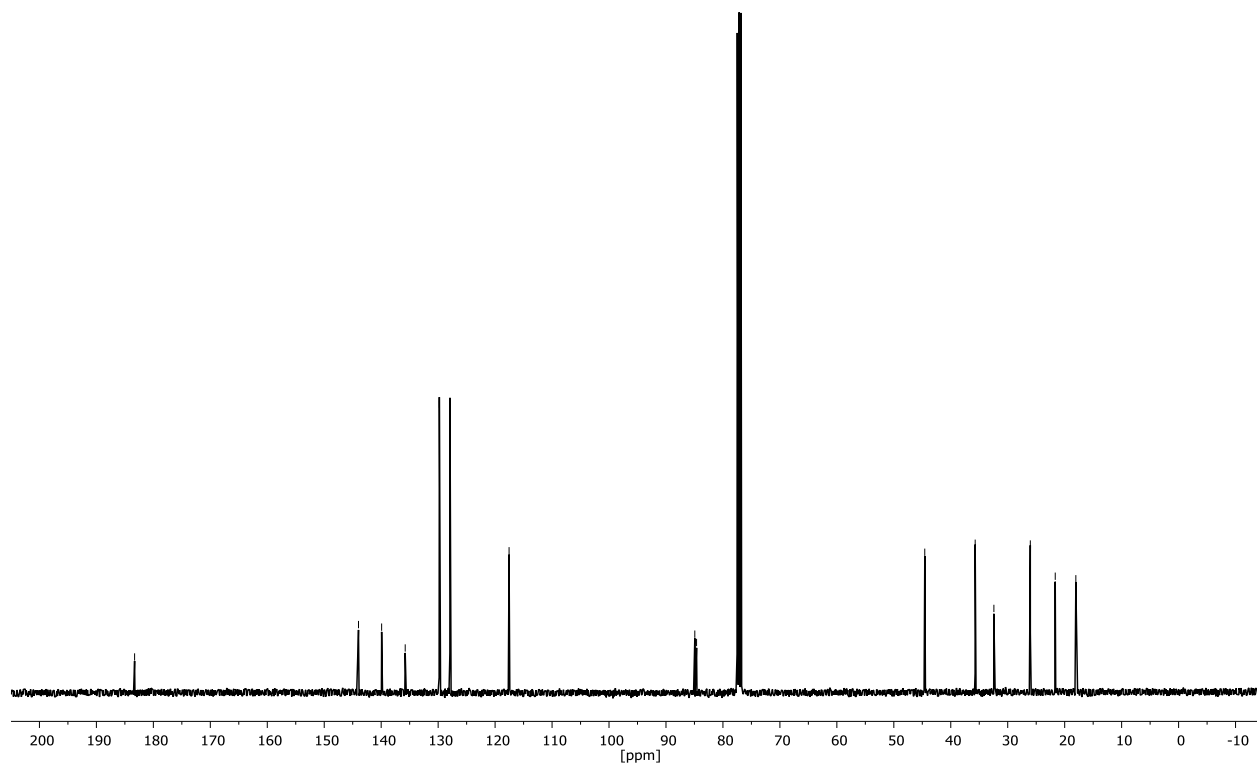

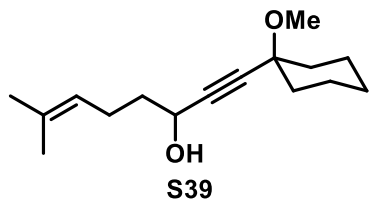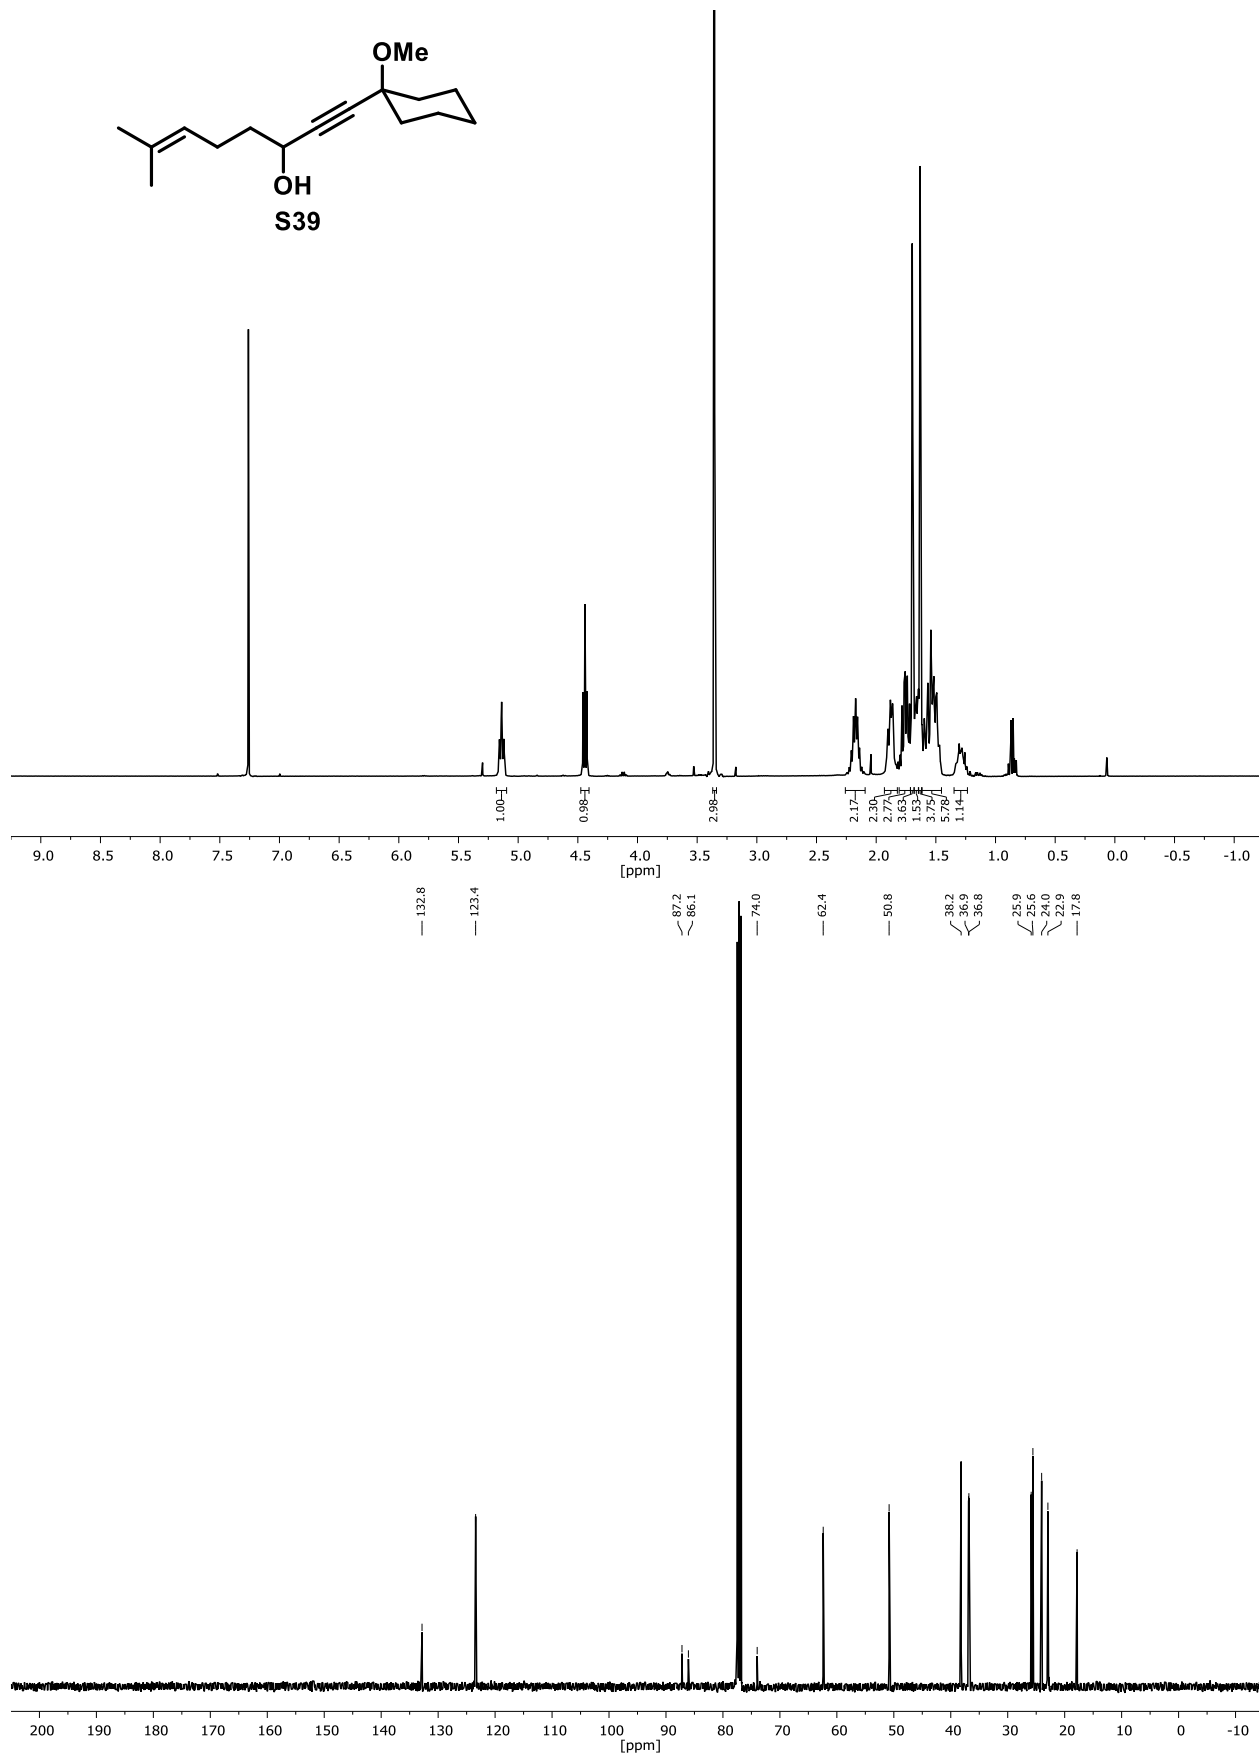

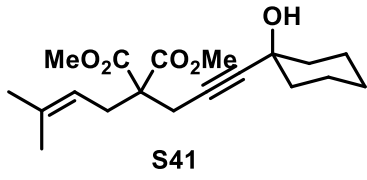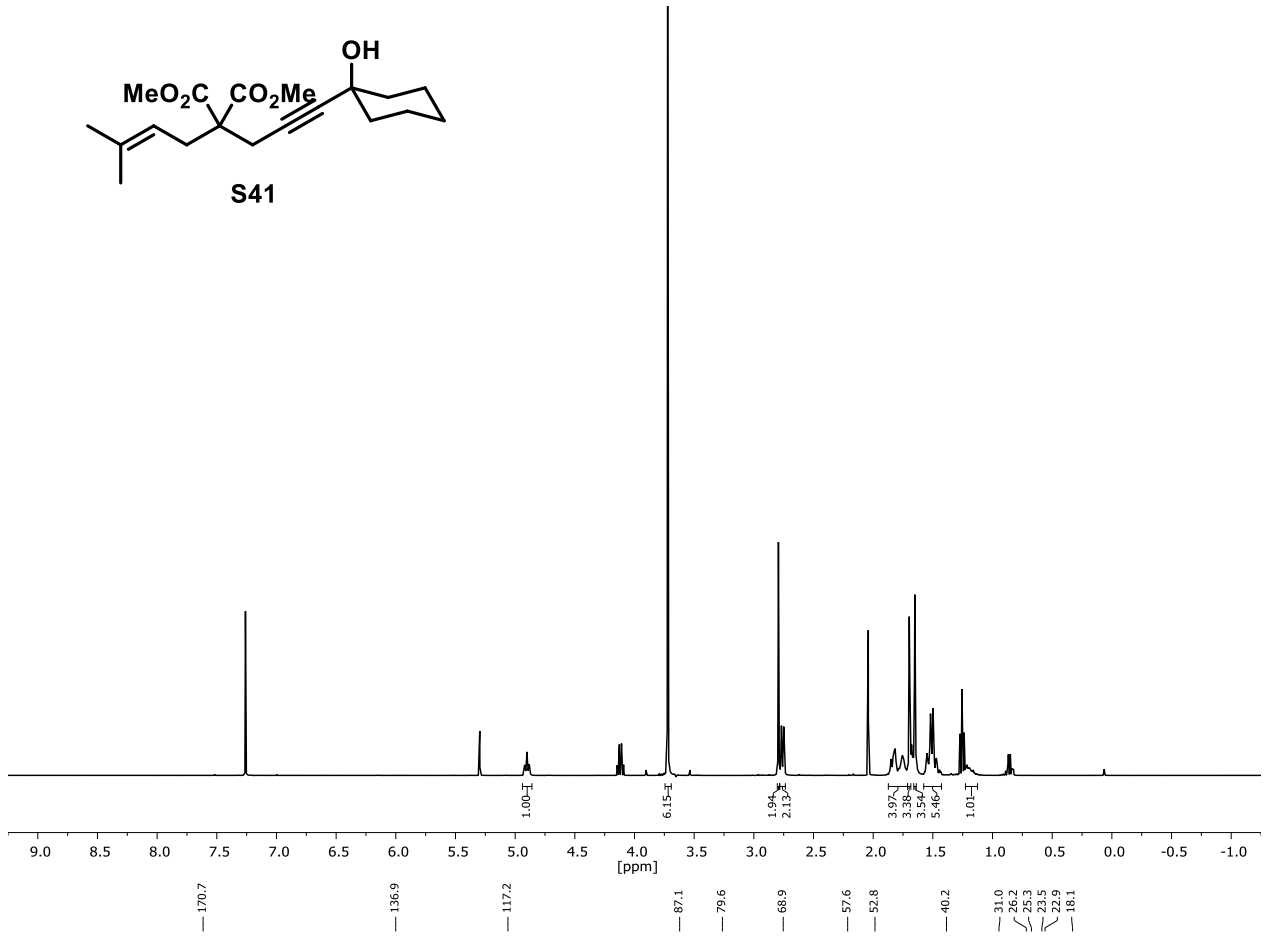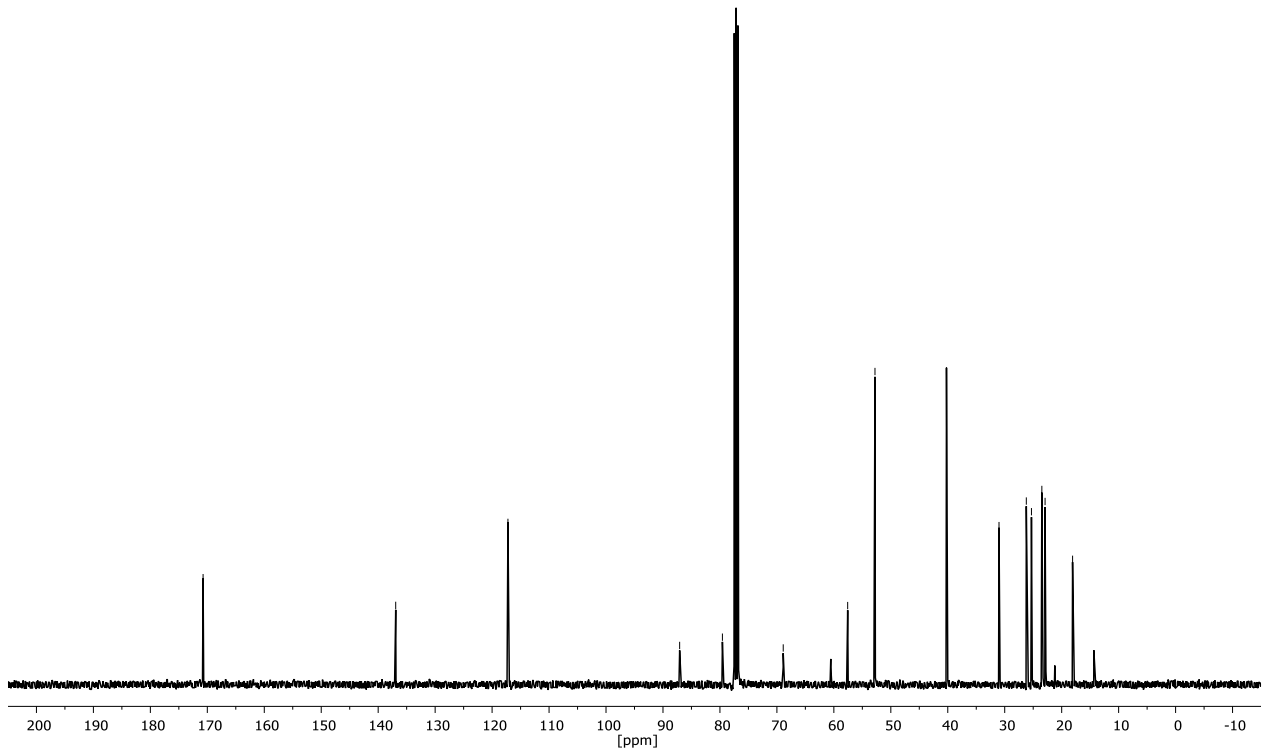



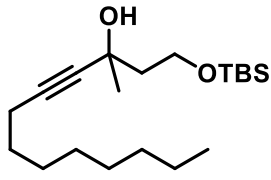

S43

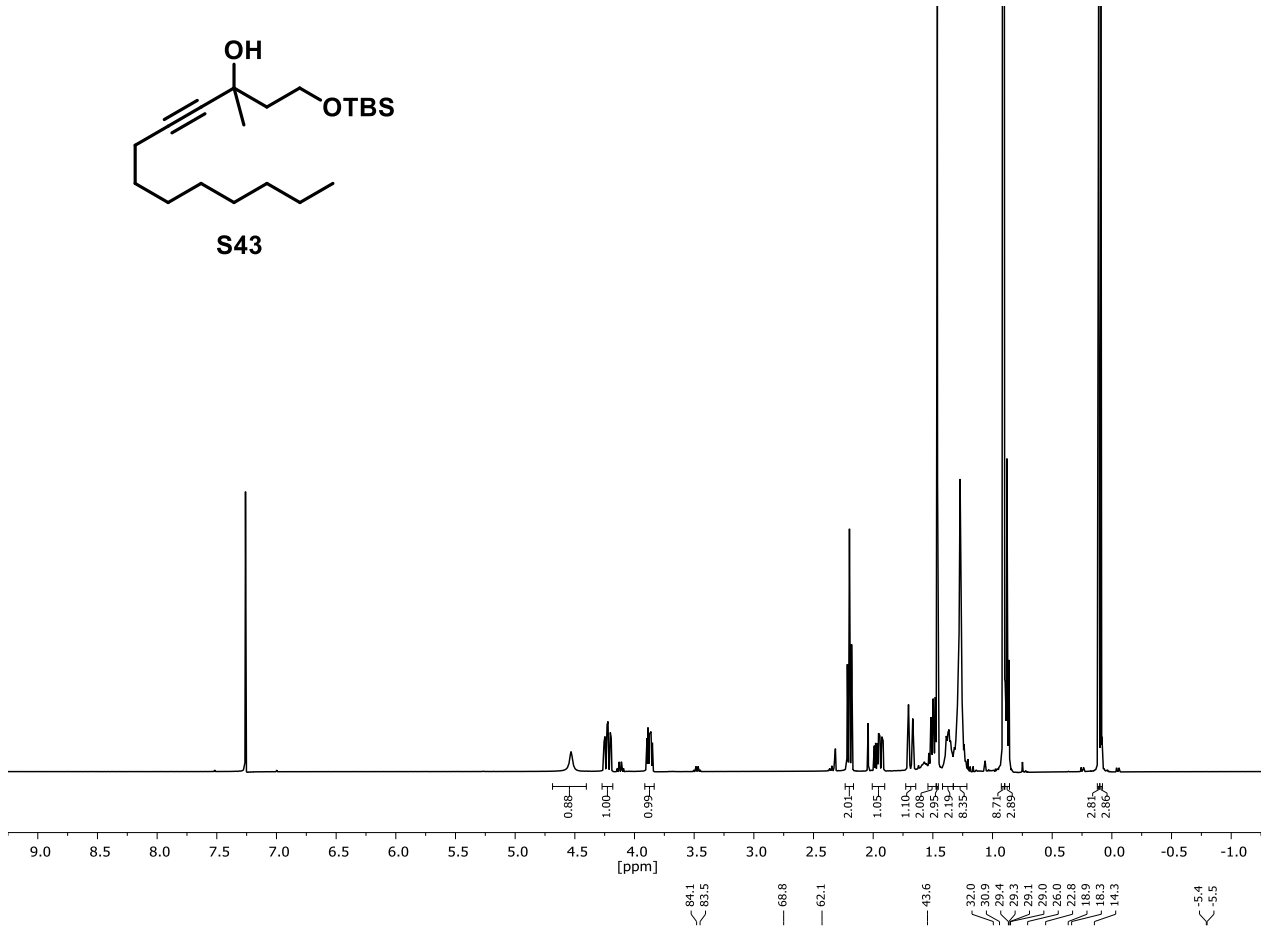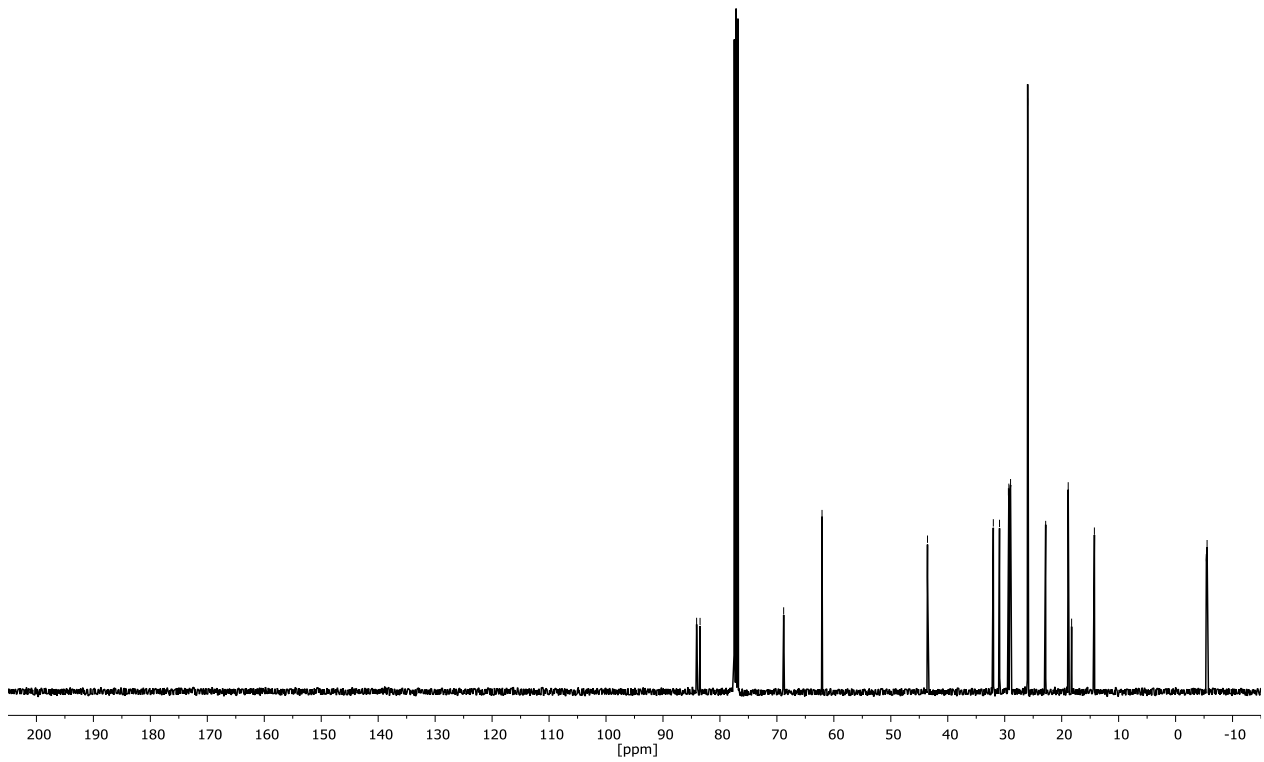

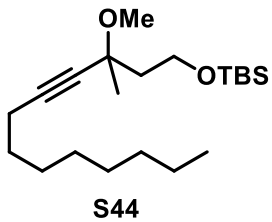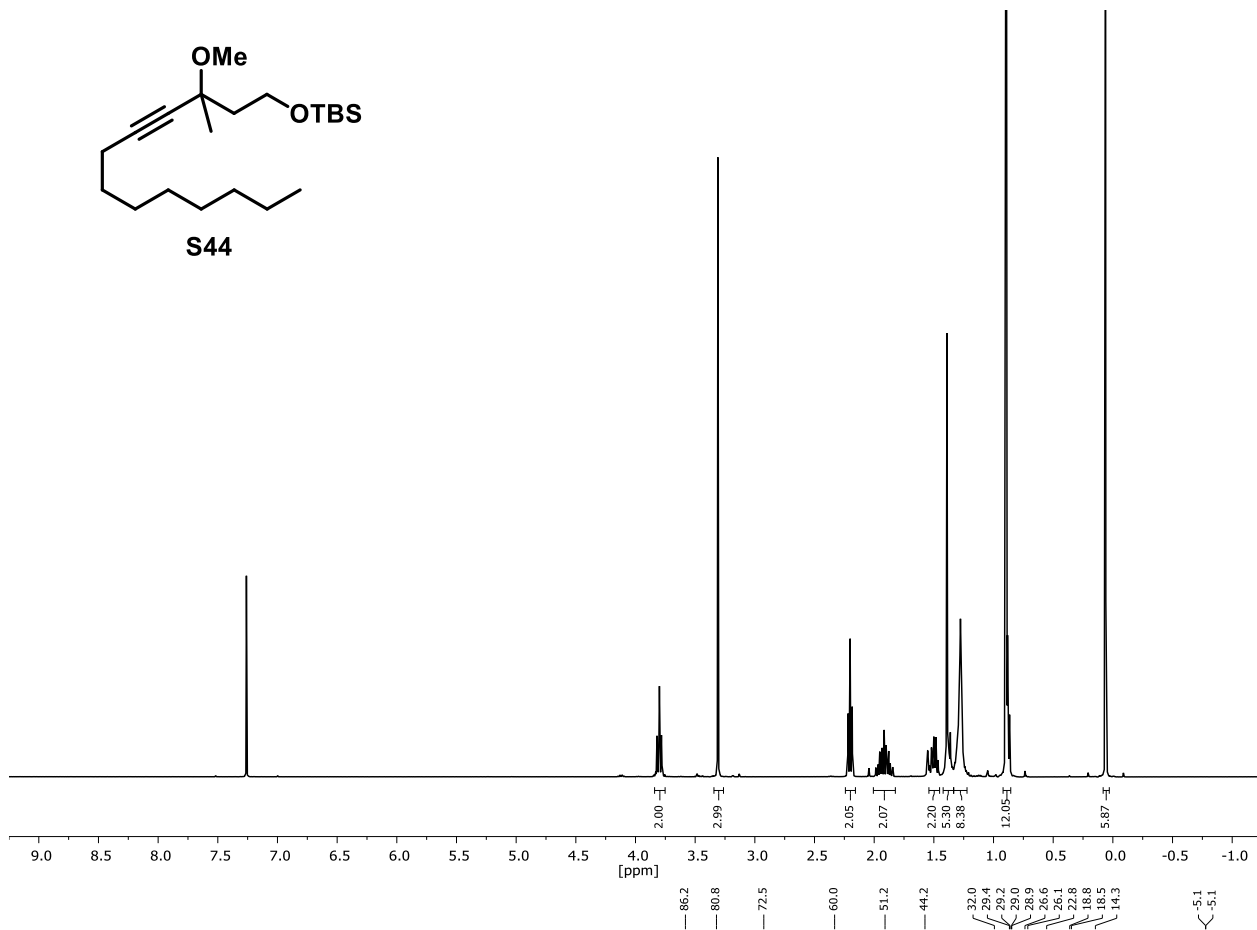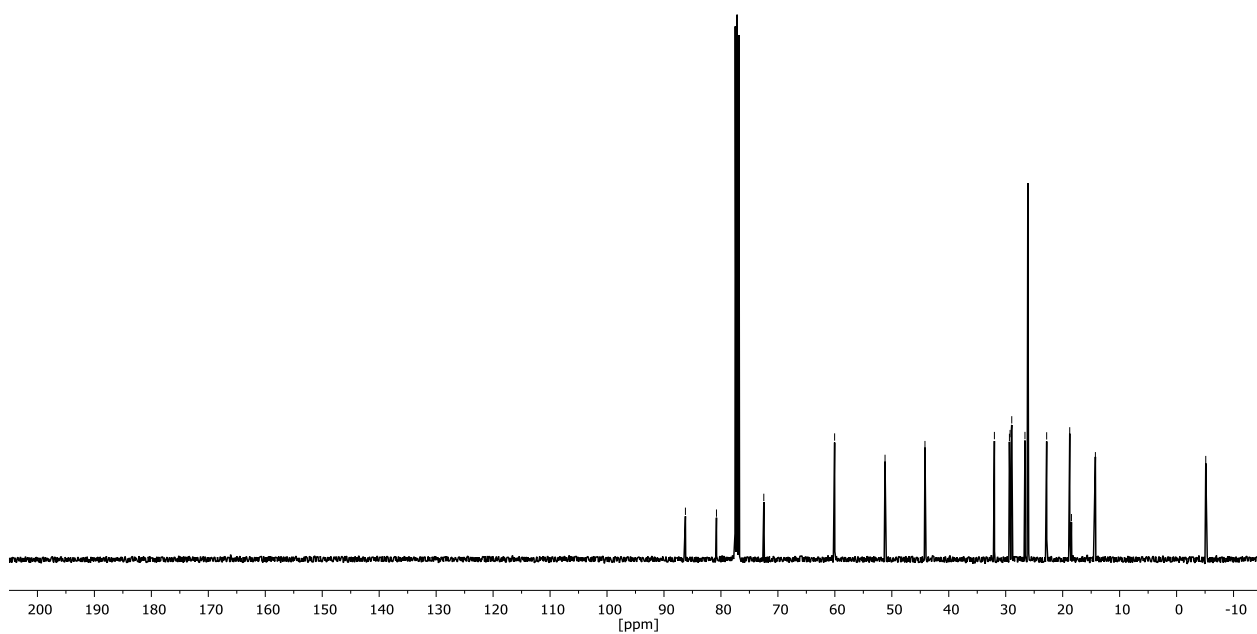

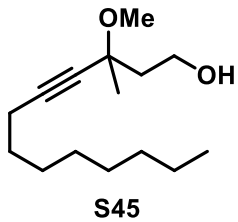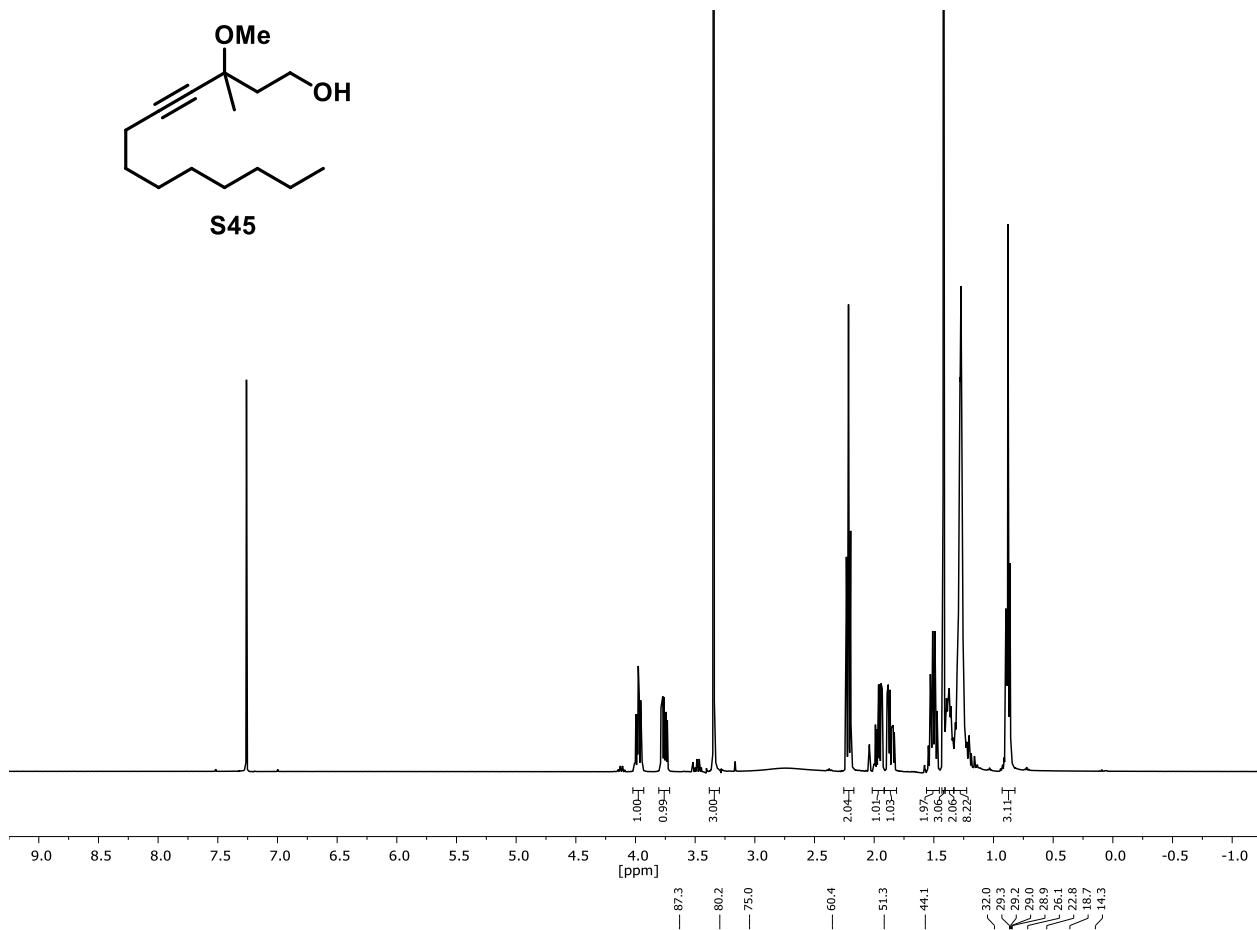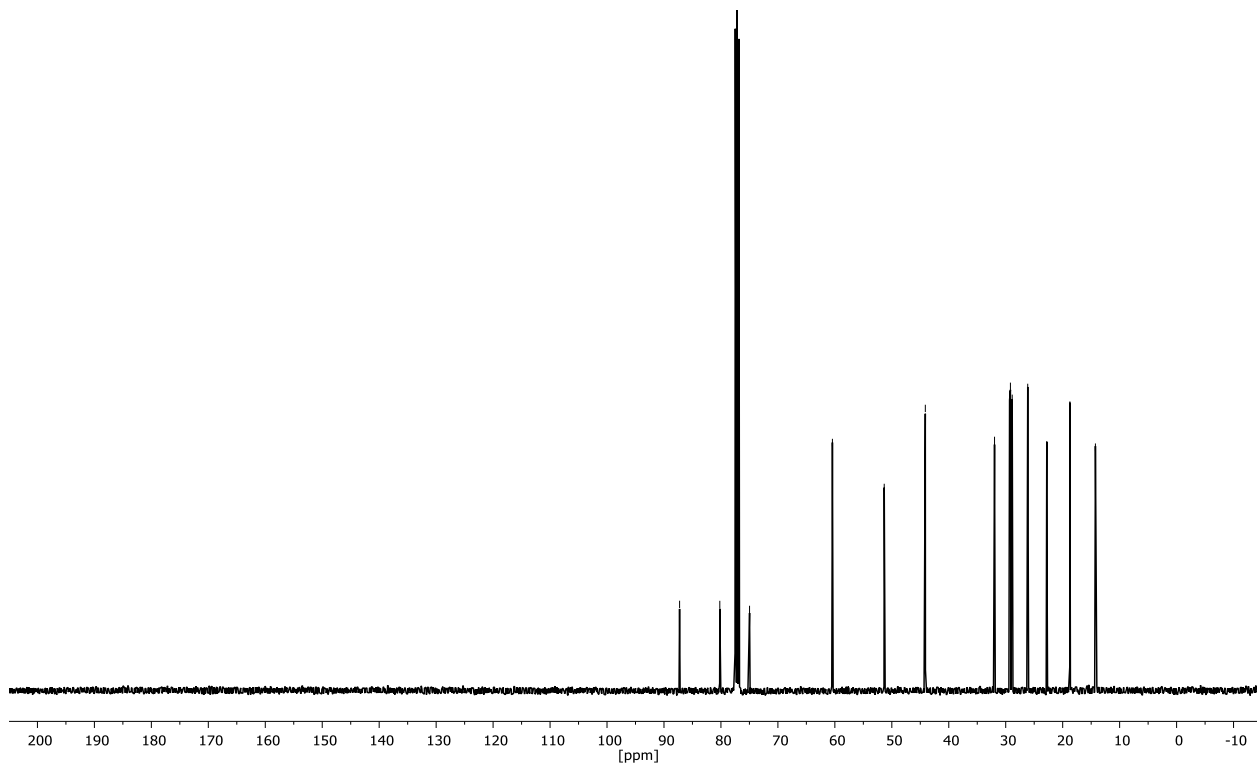

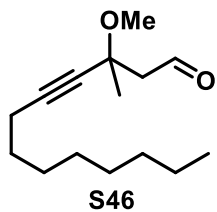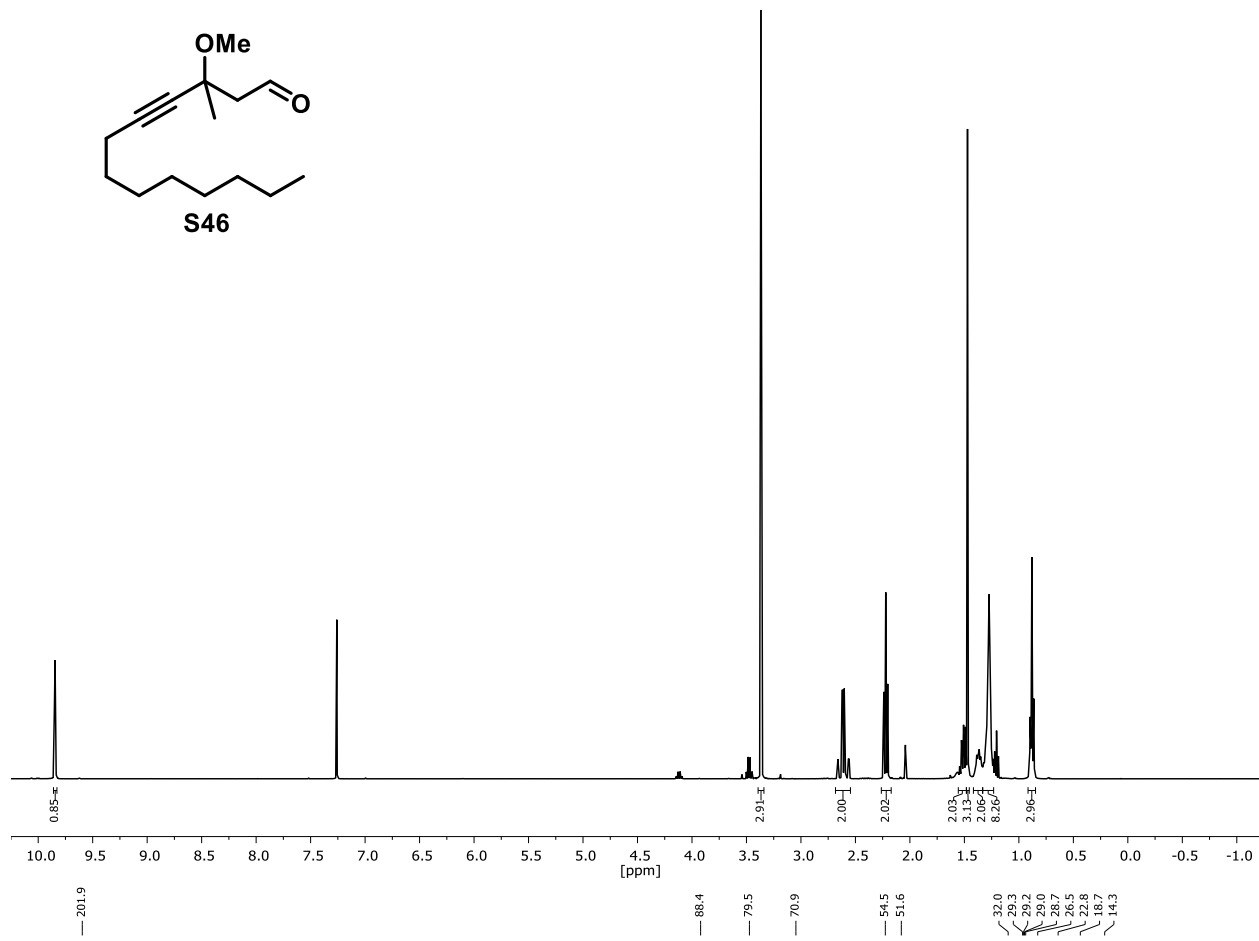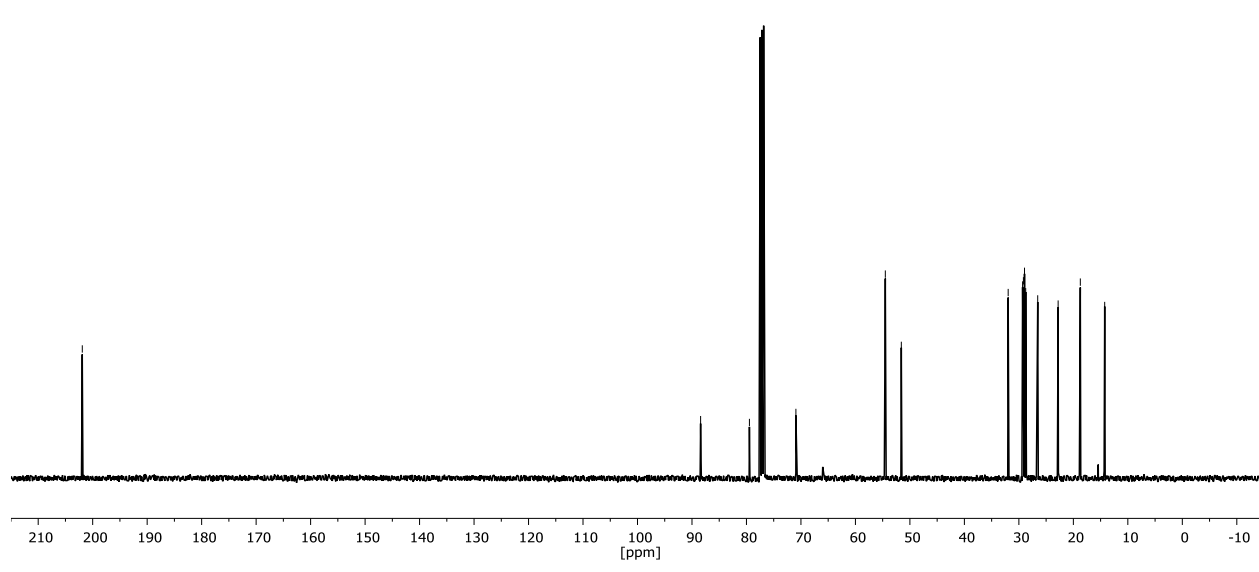

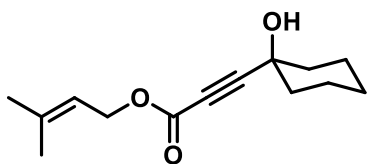

S47

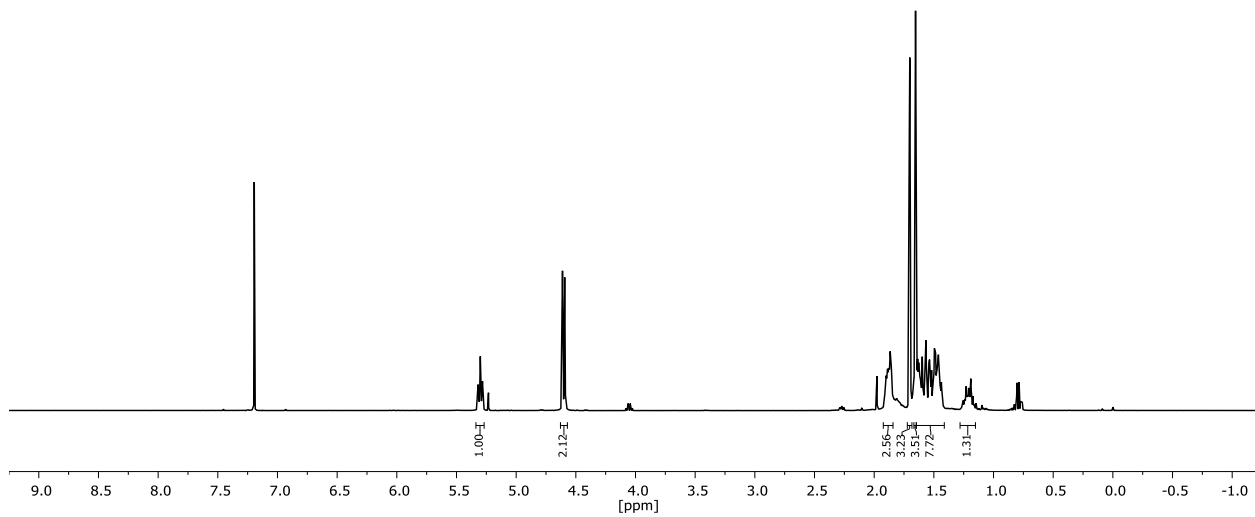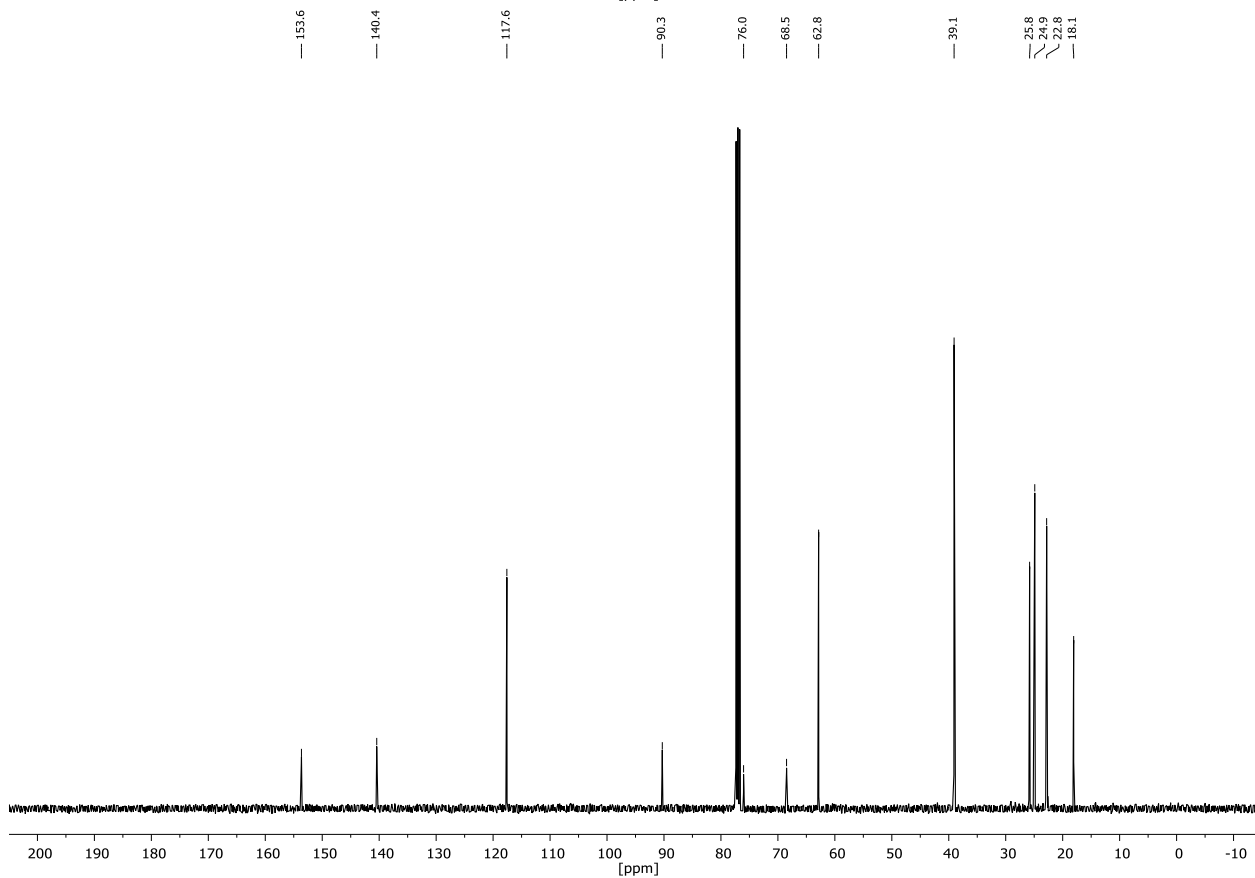

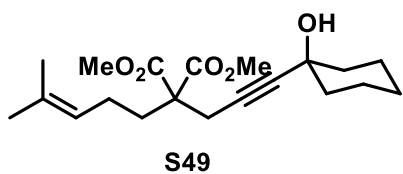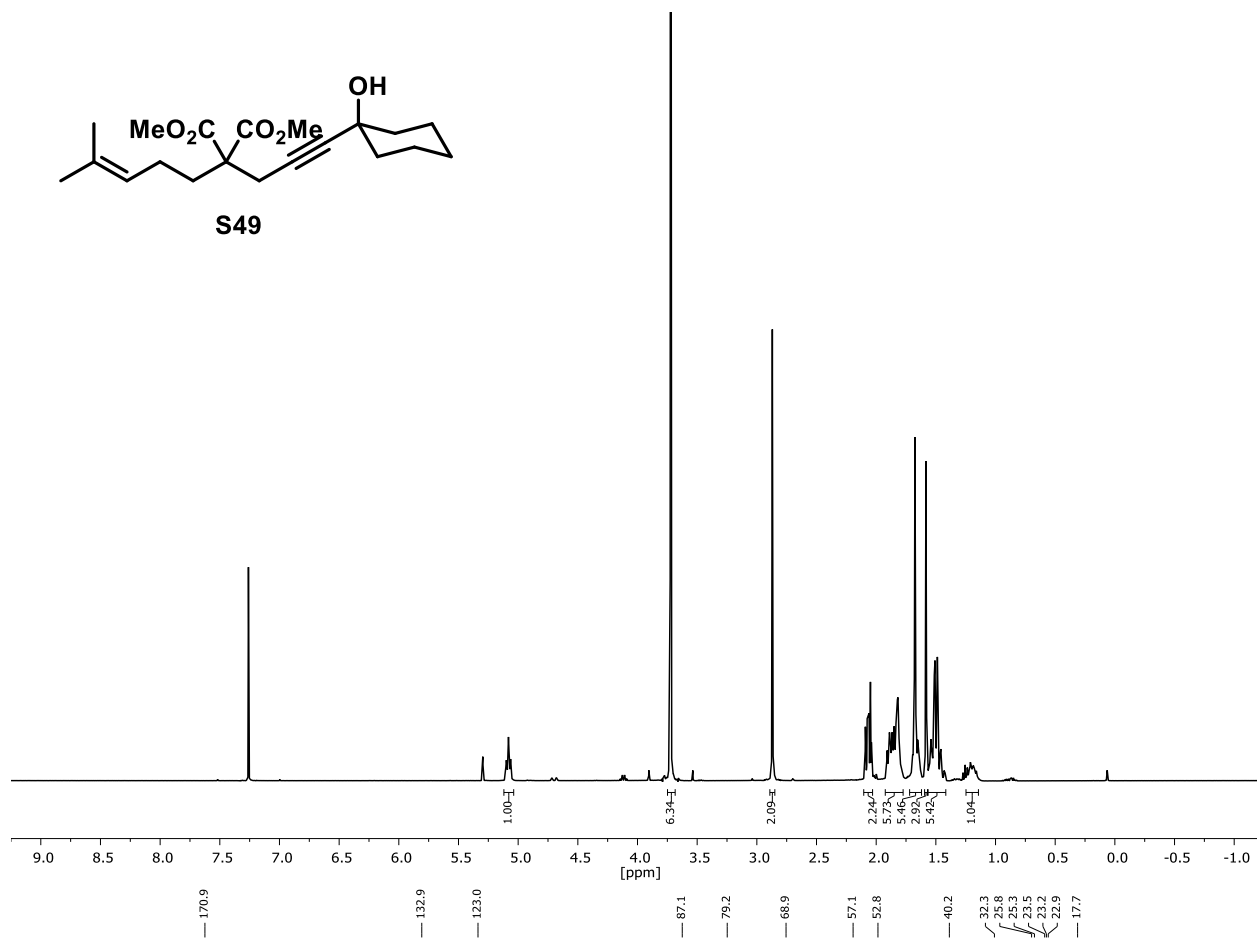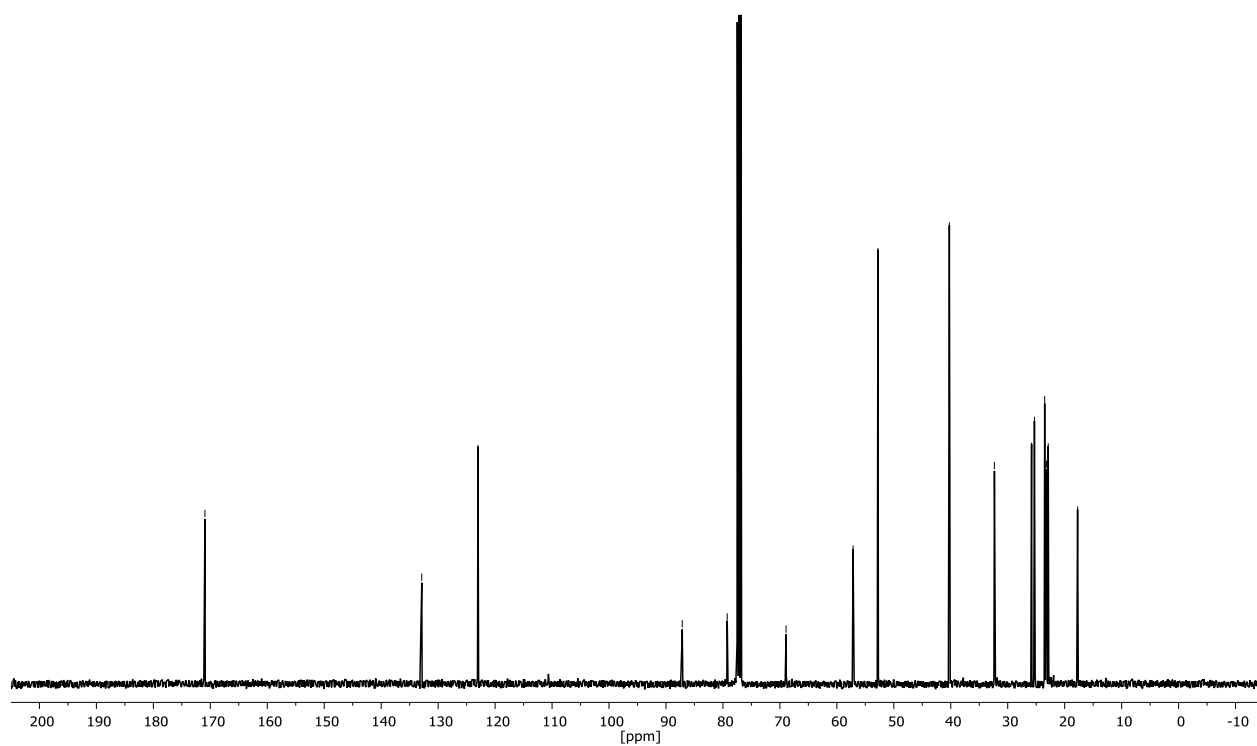

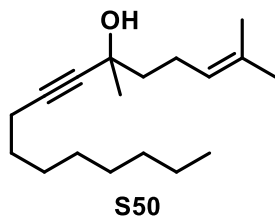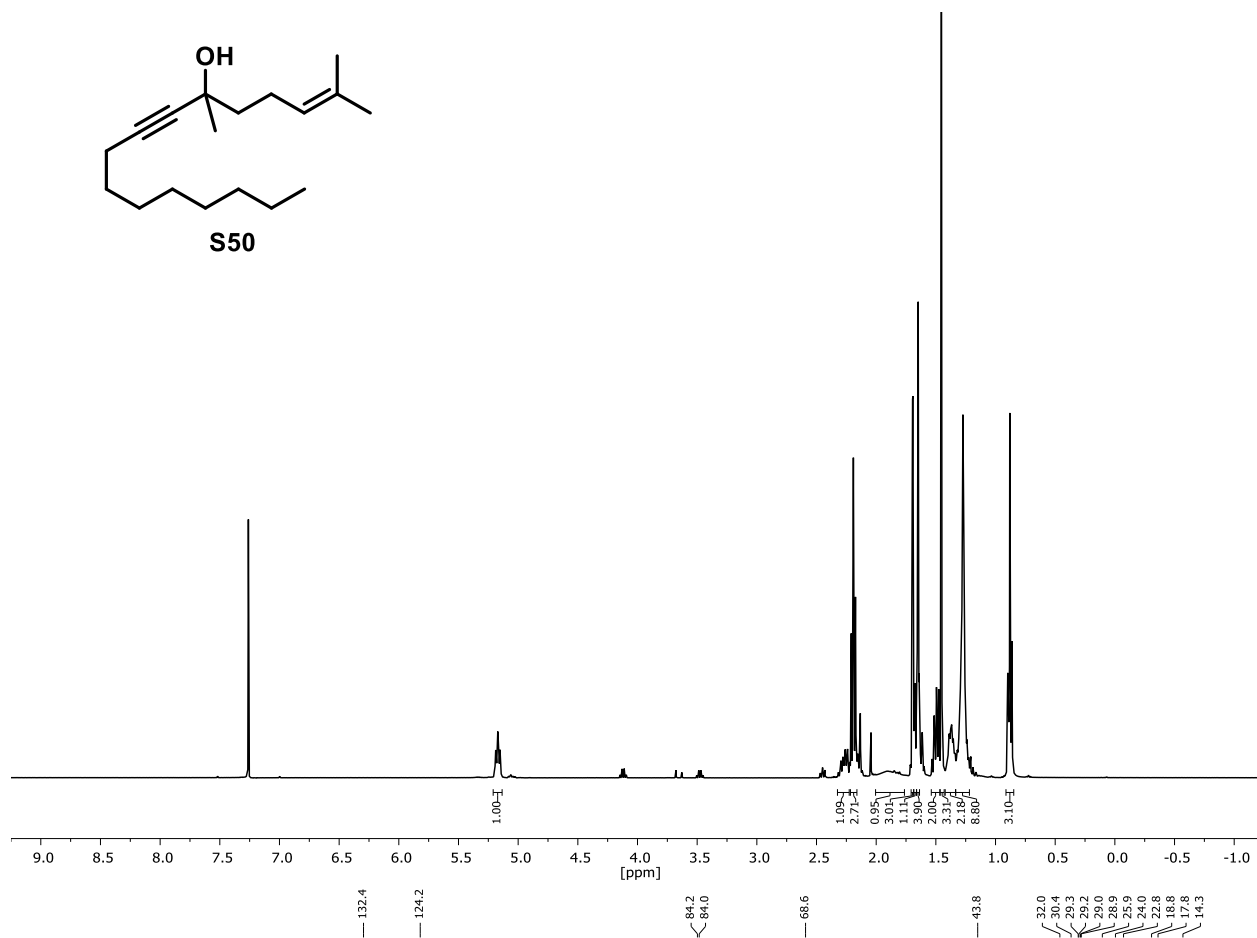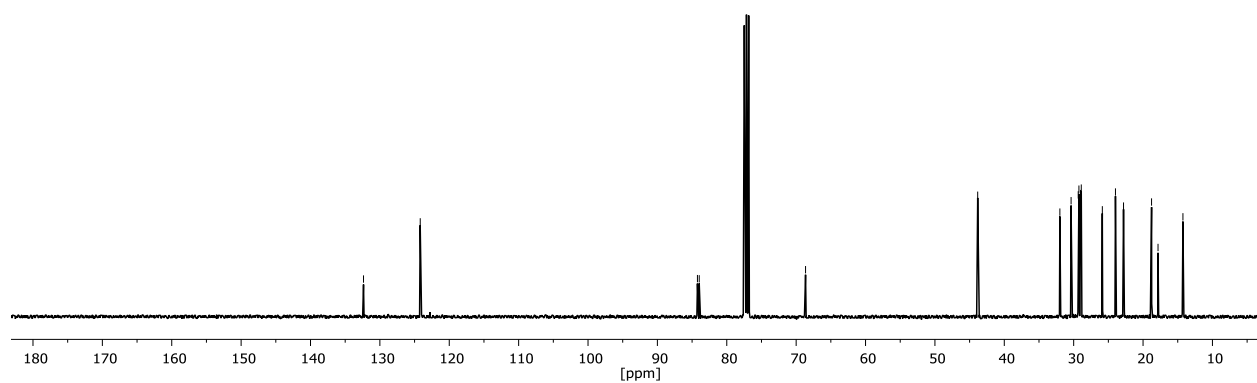

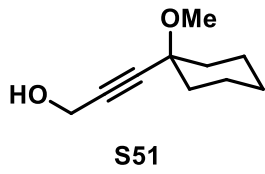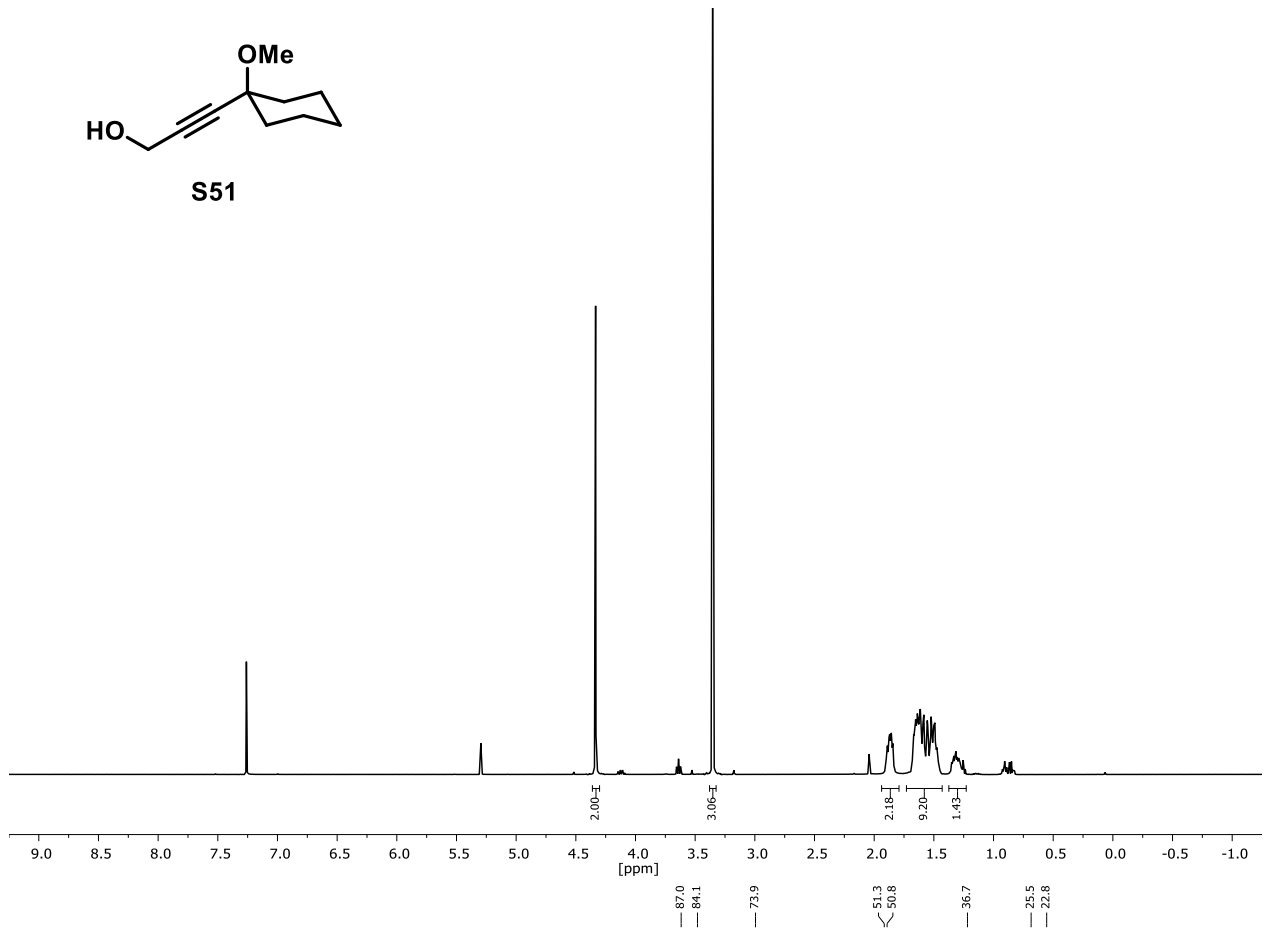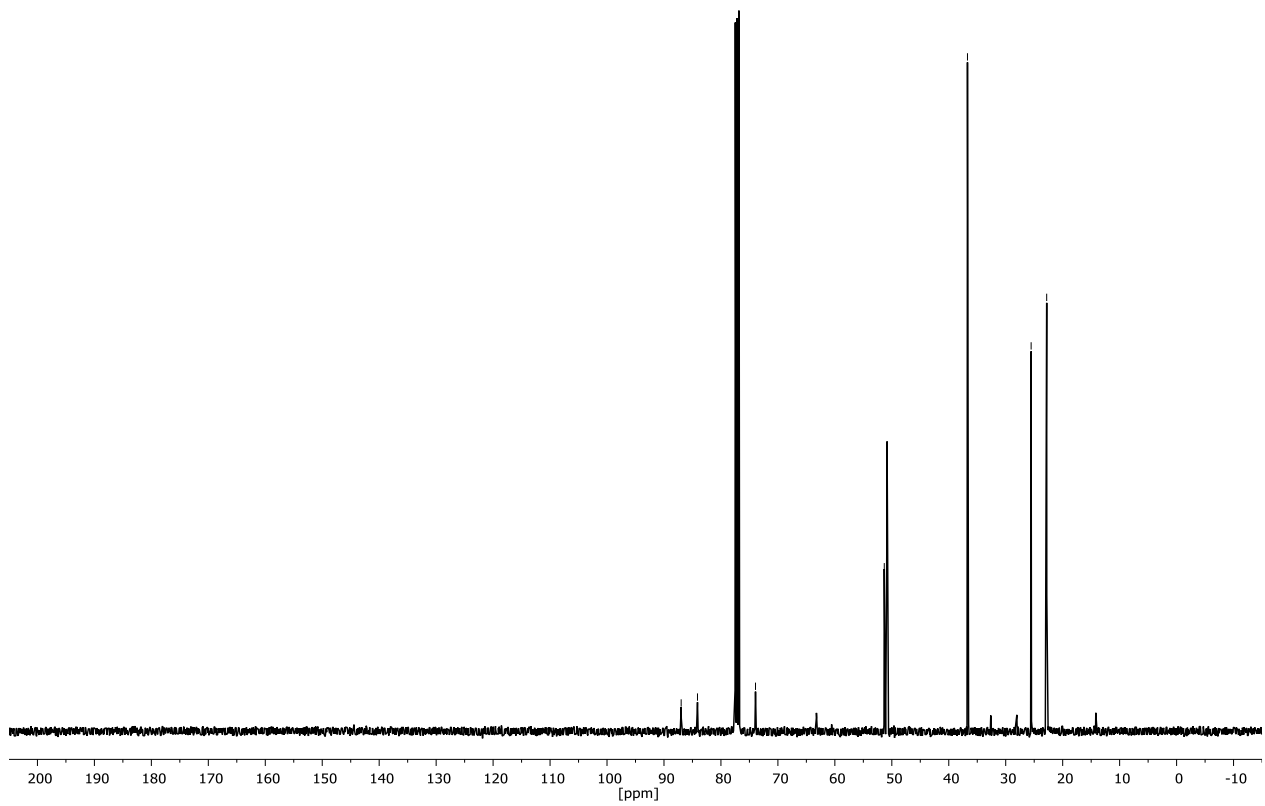



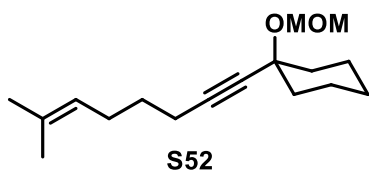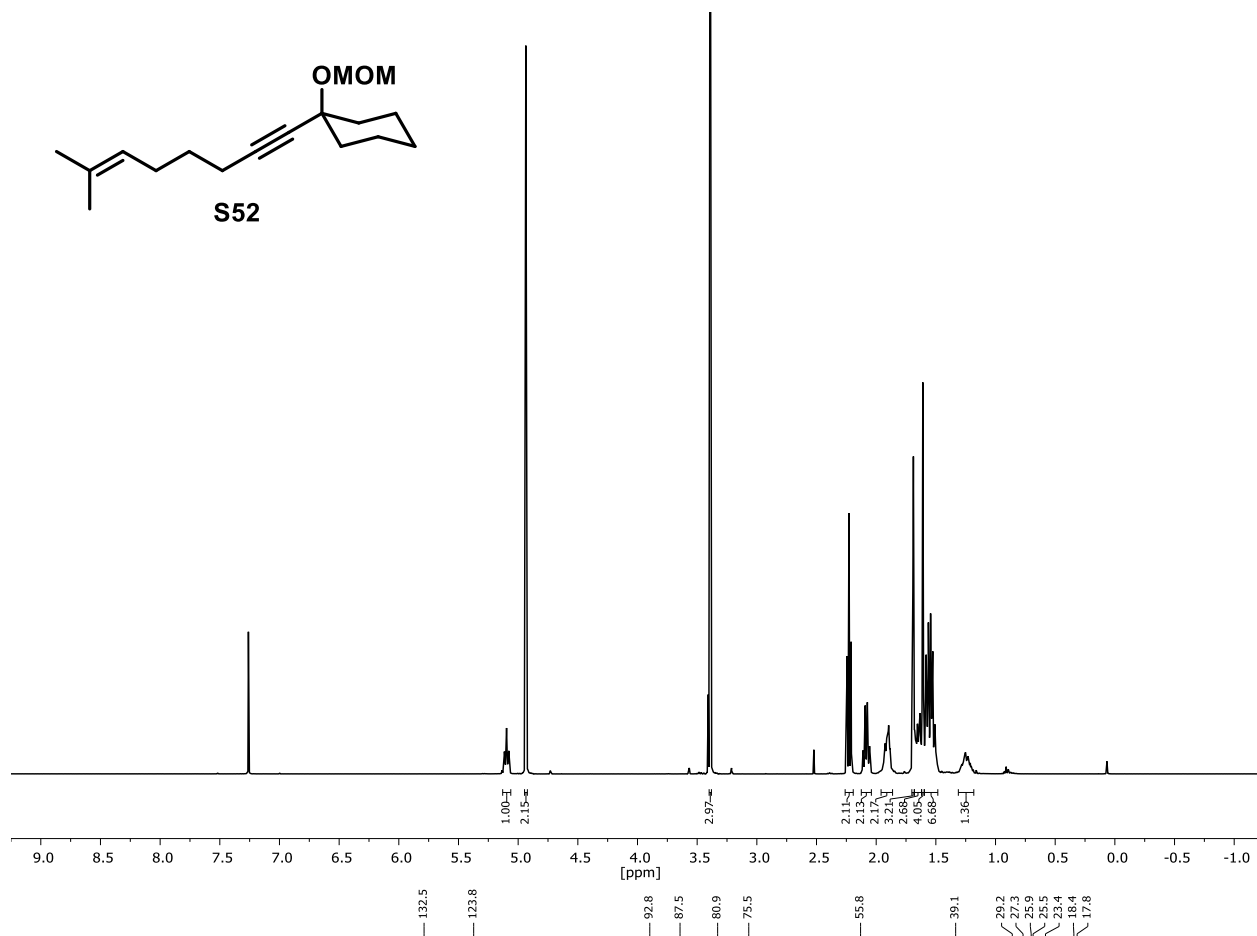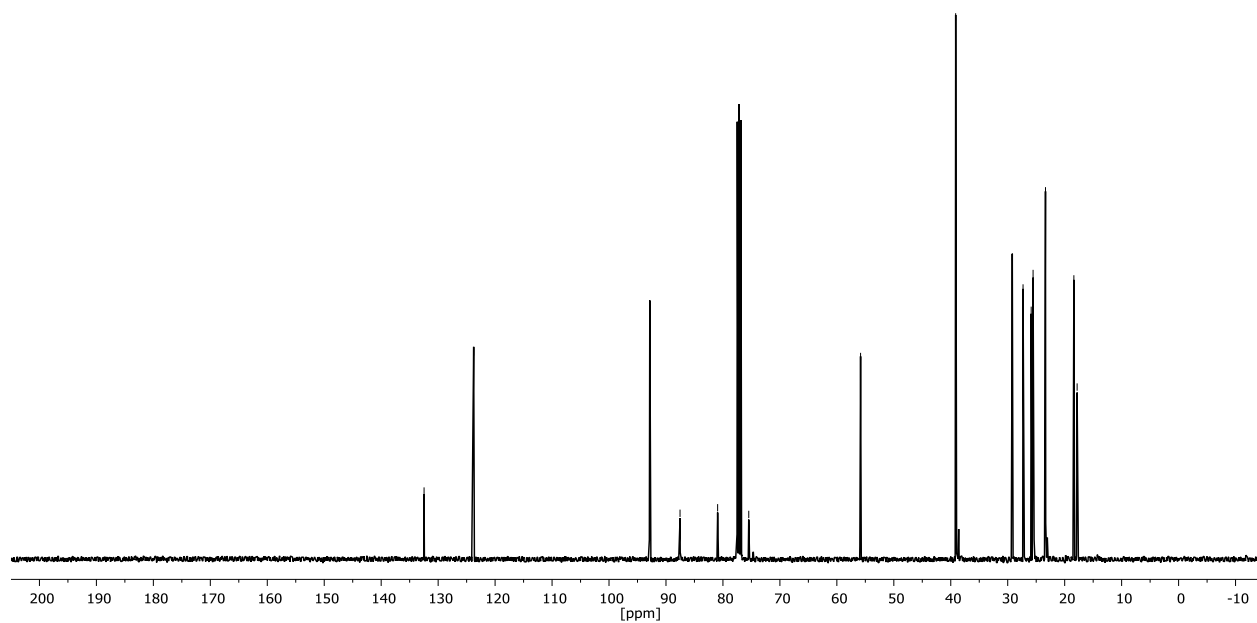

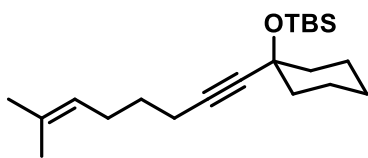

S53

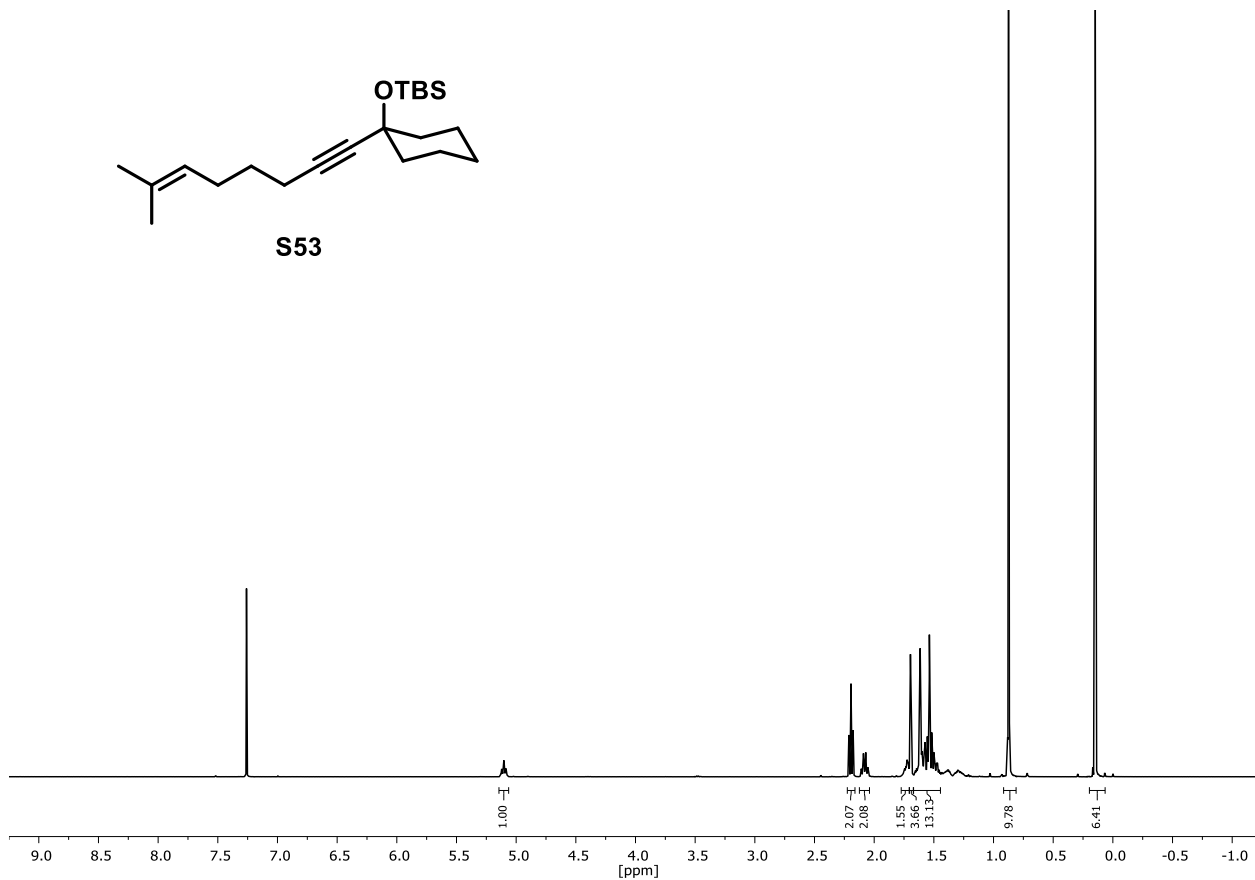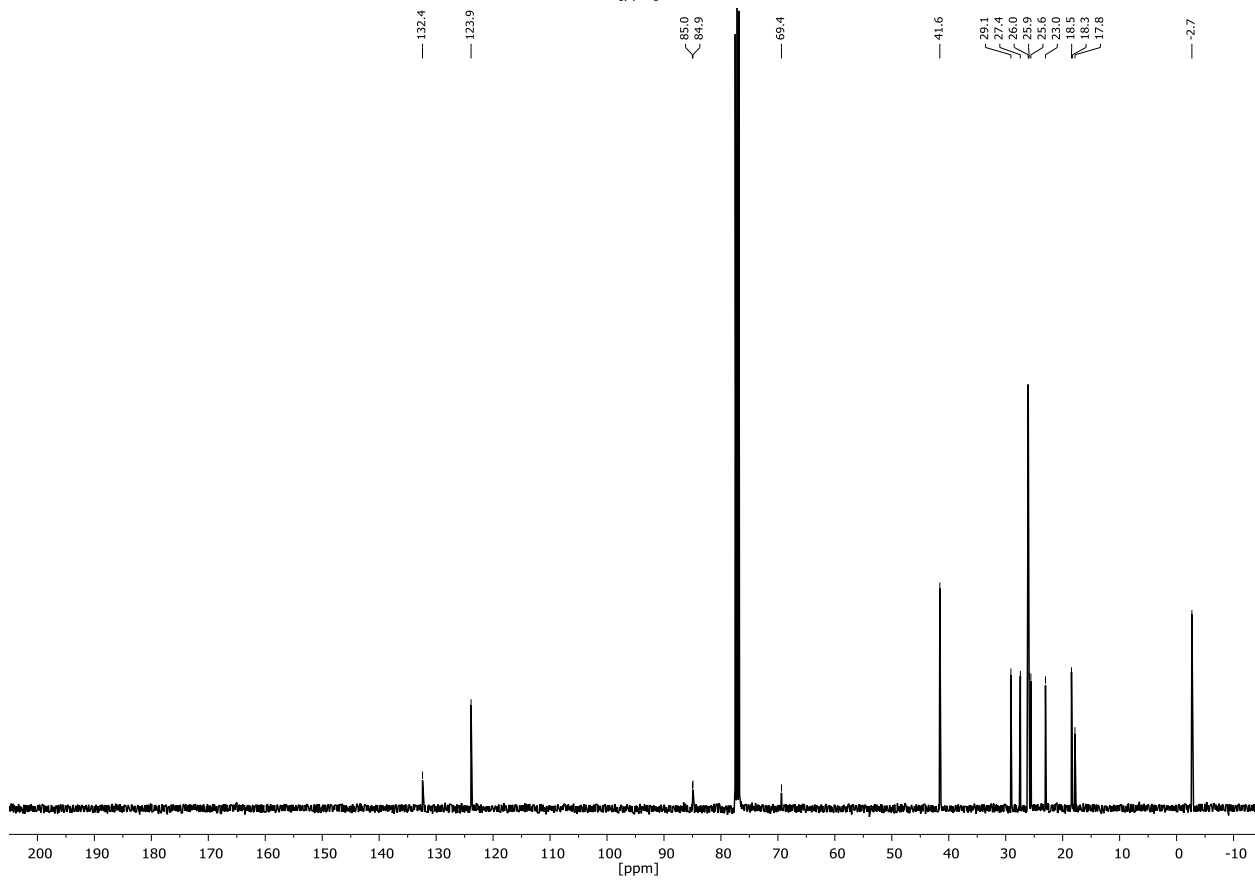

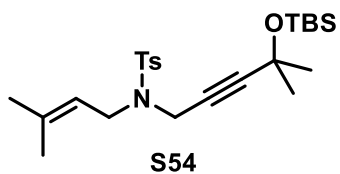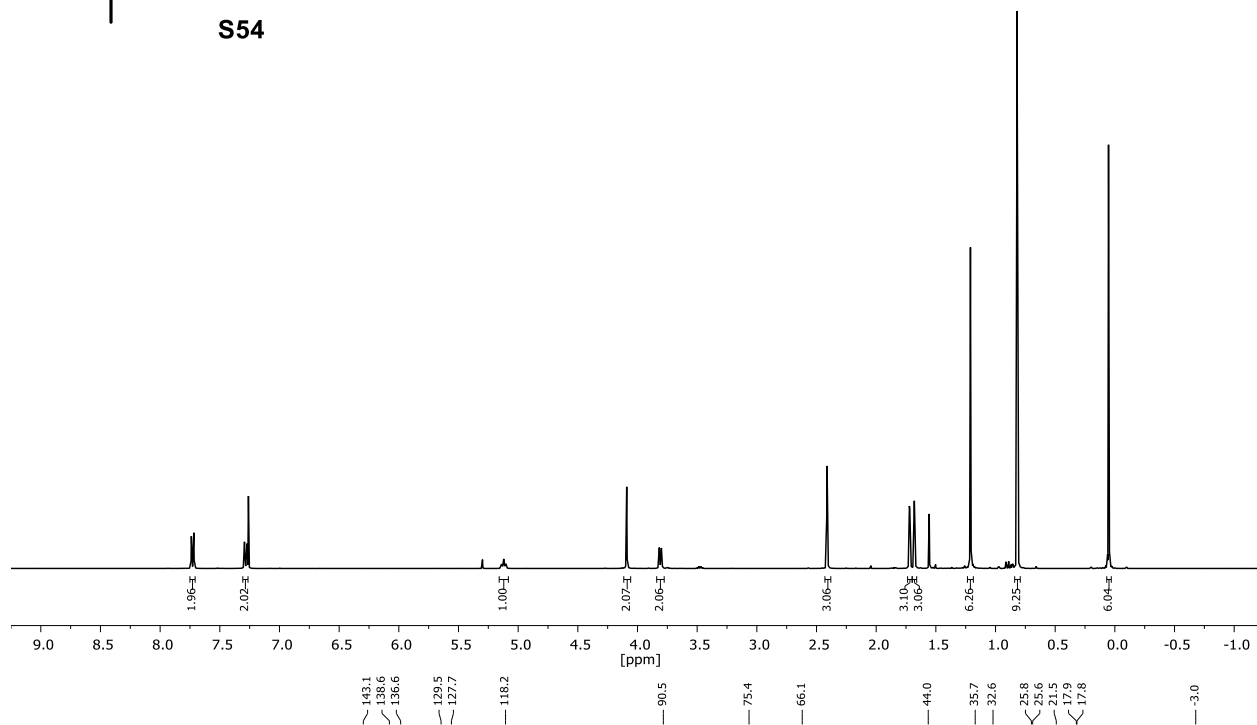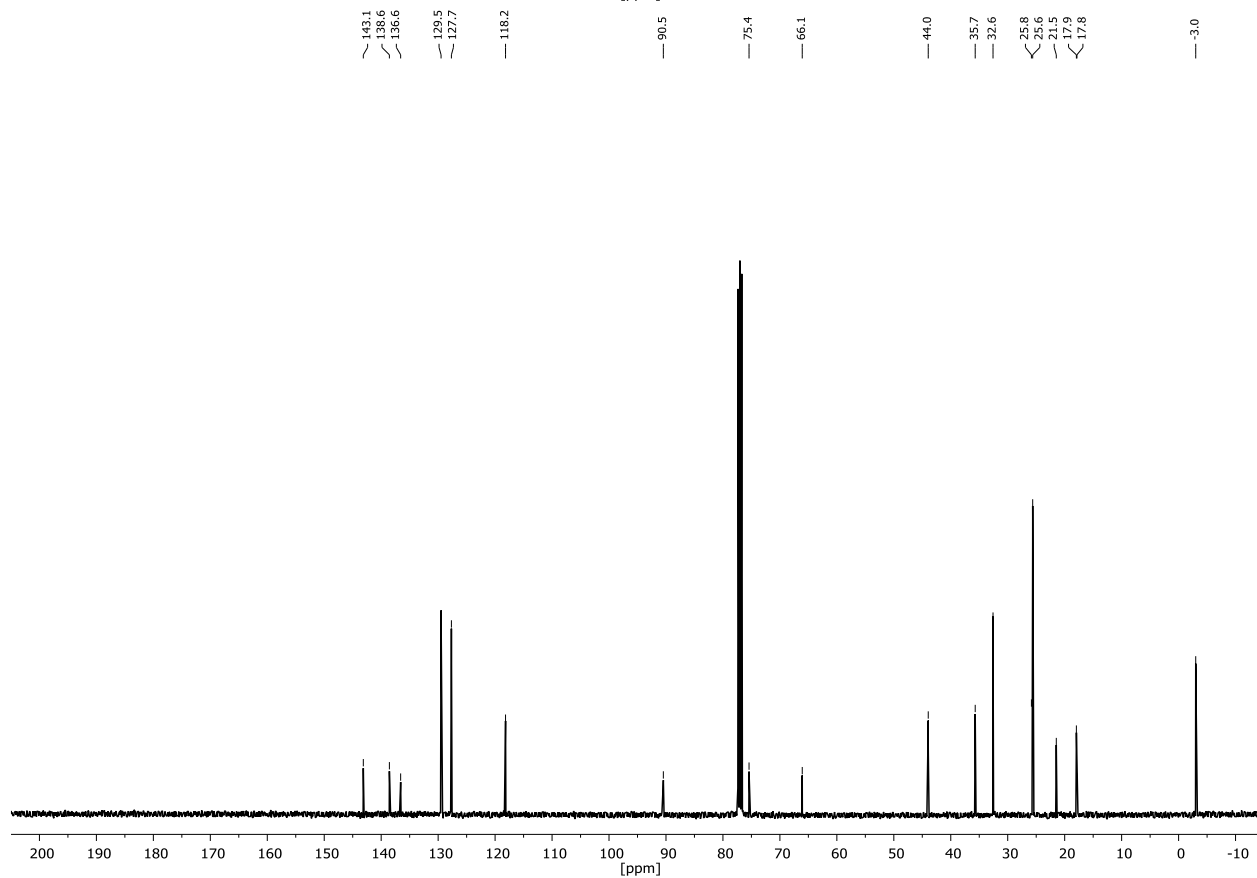

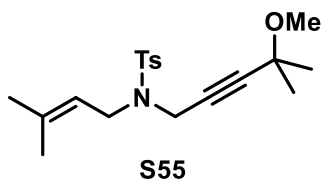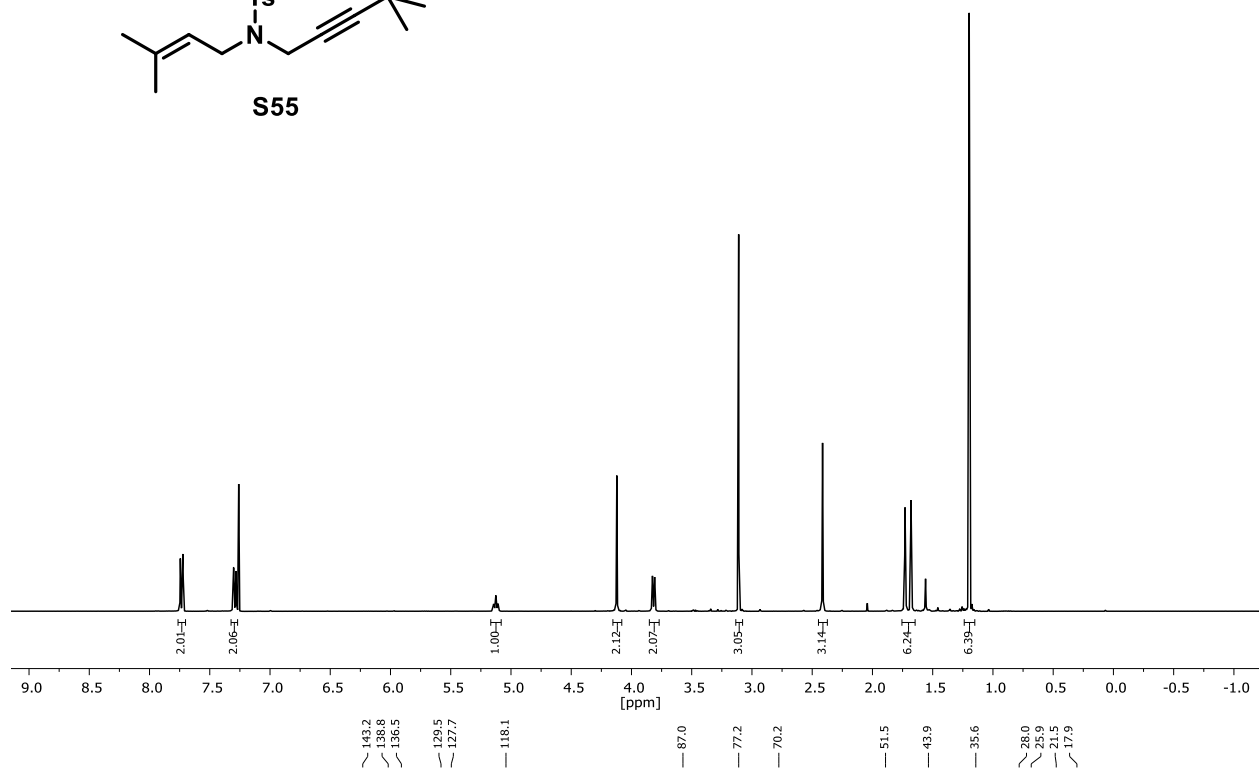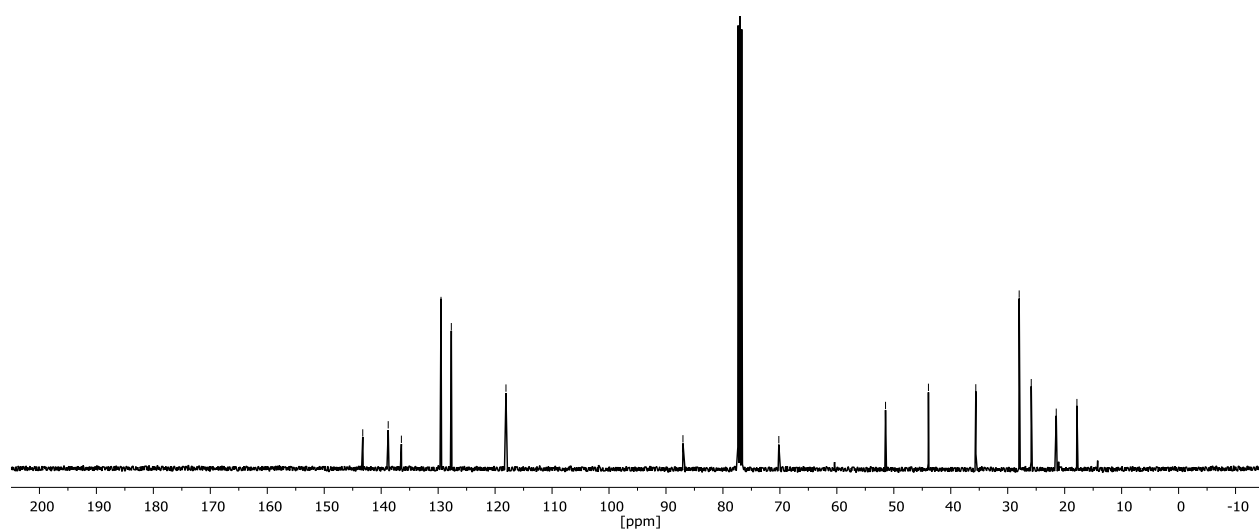

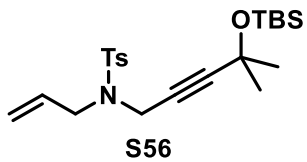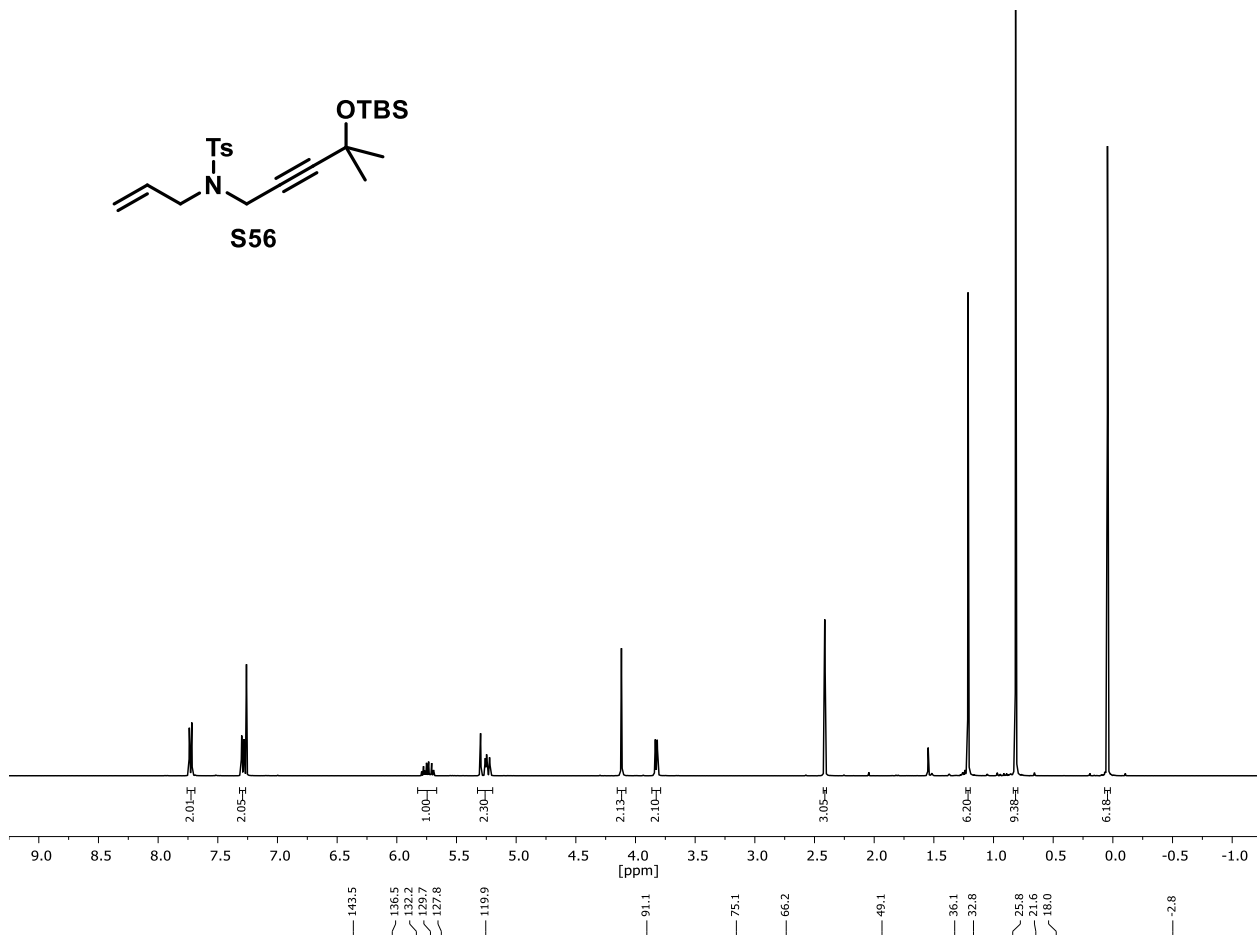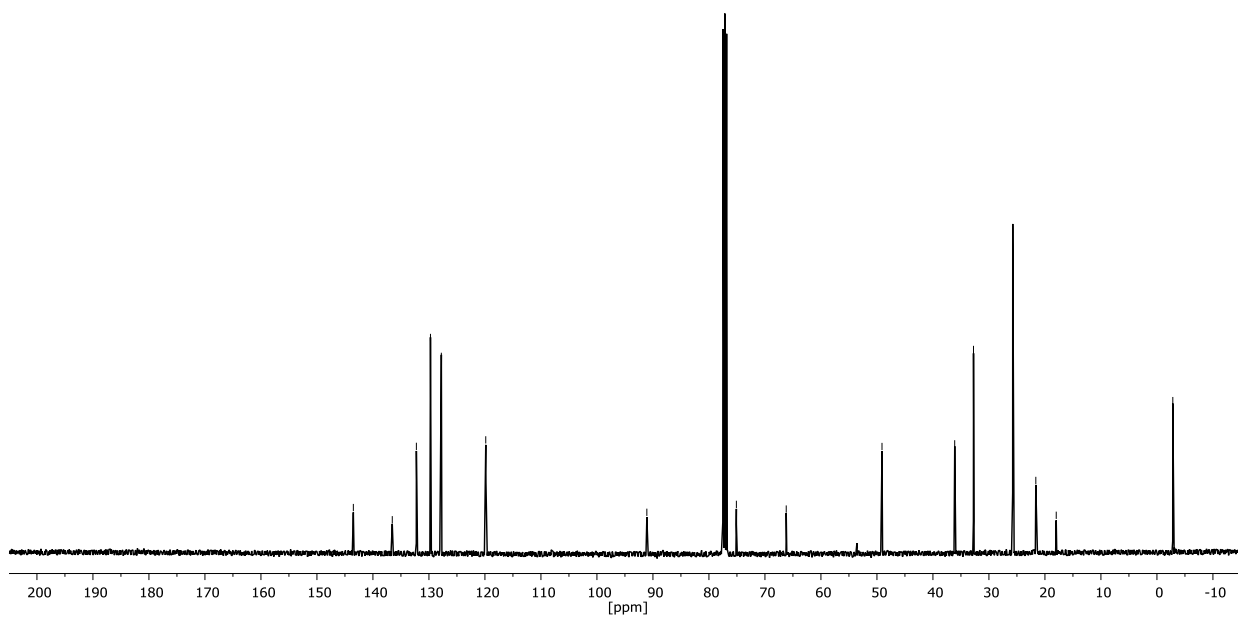

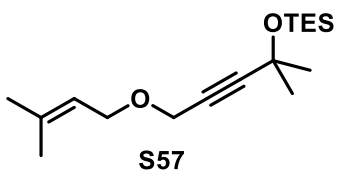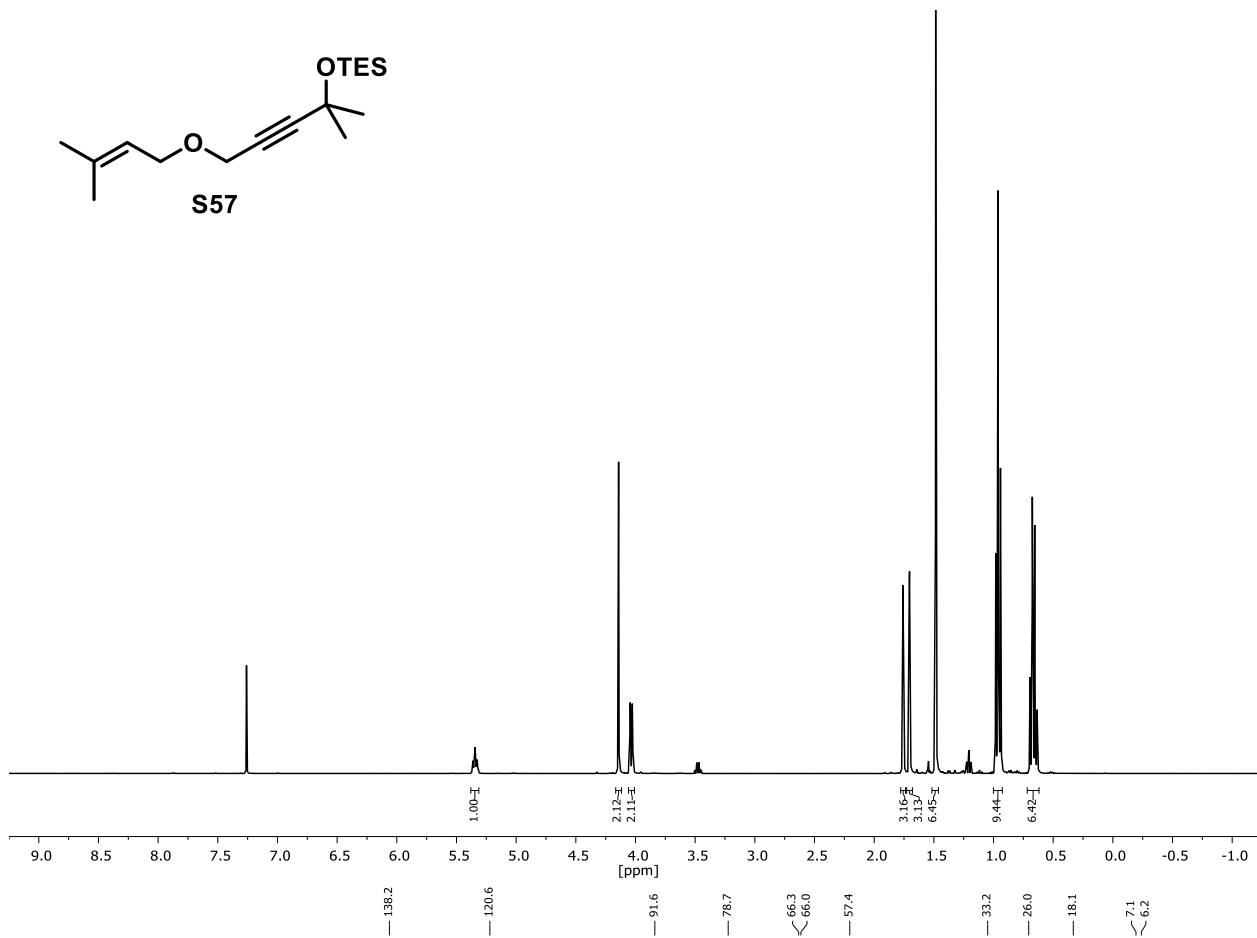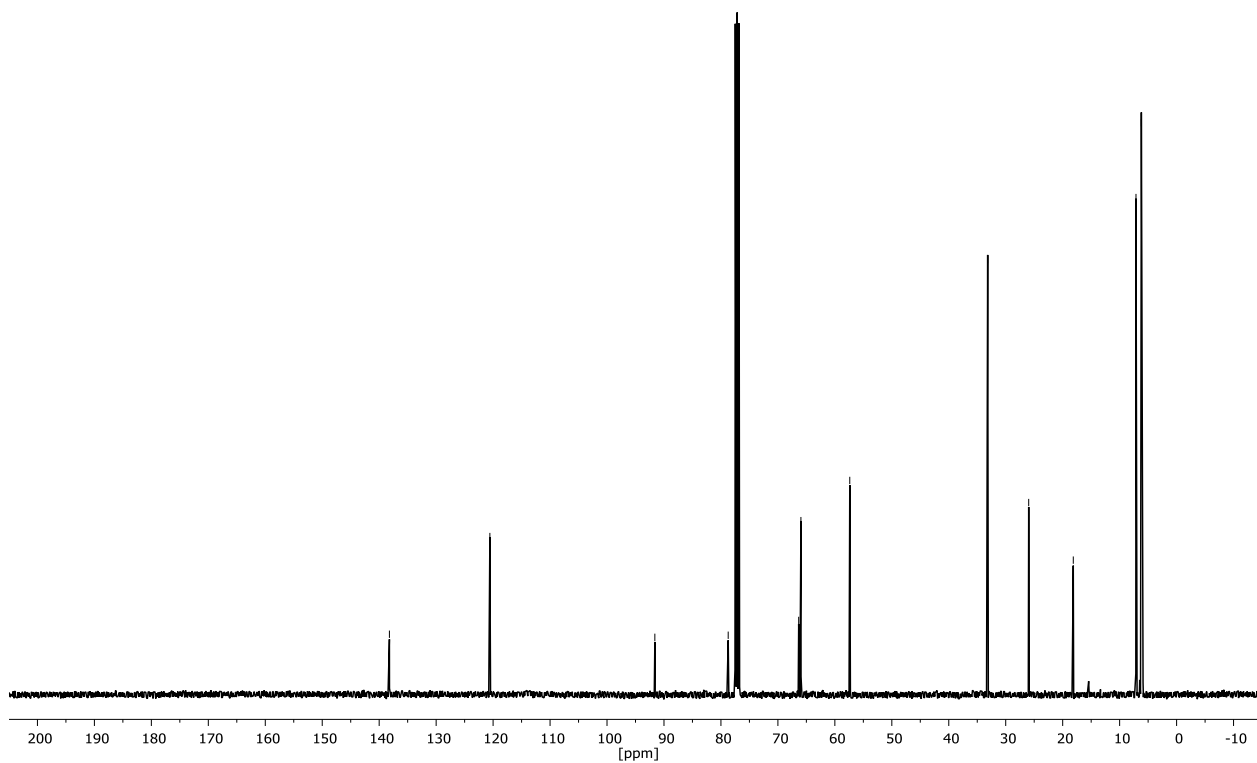

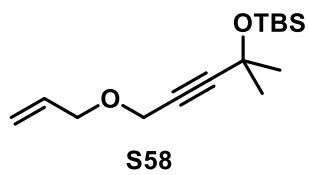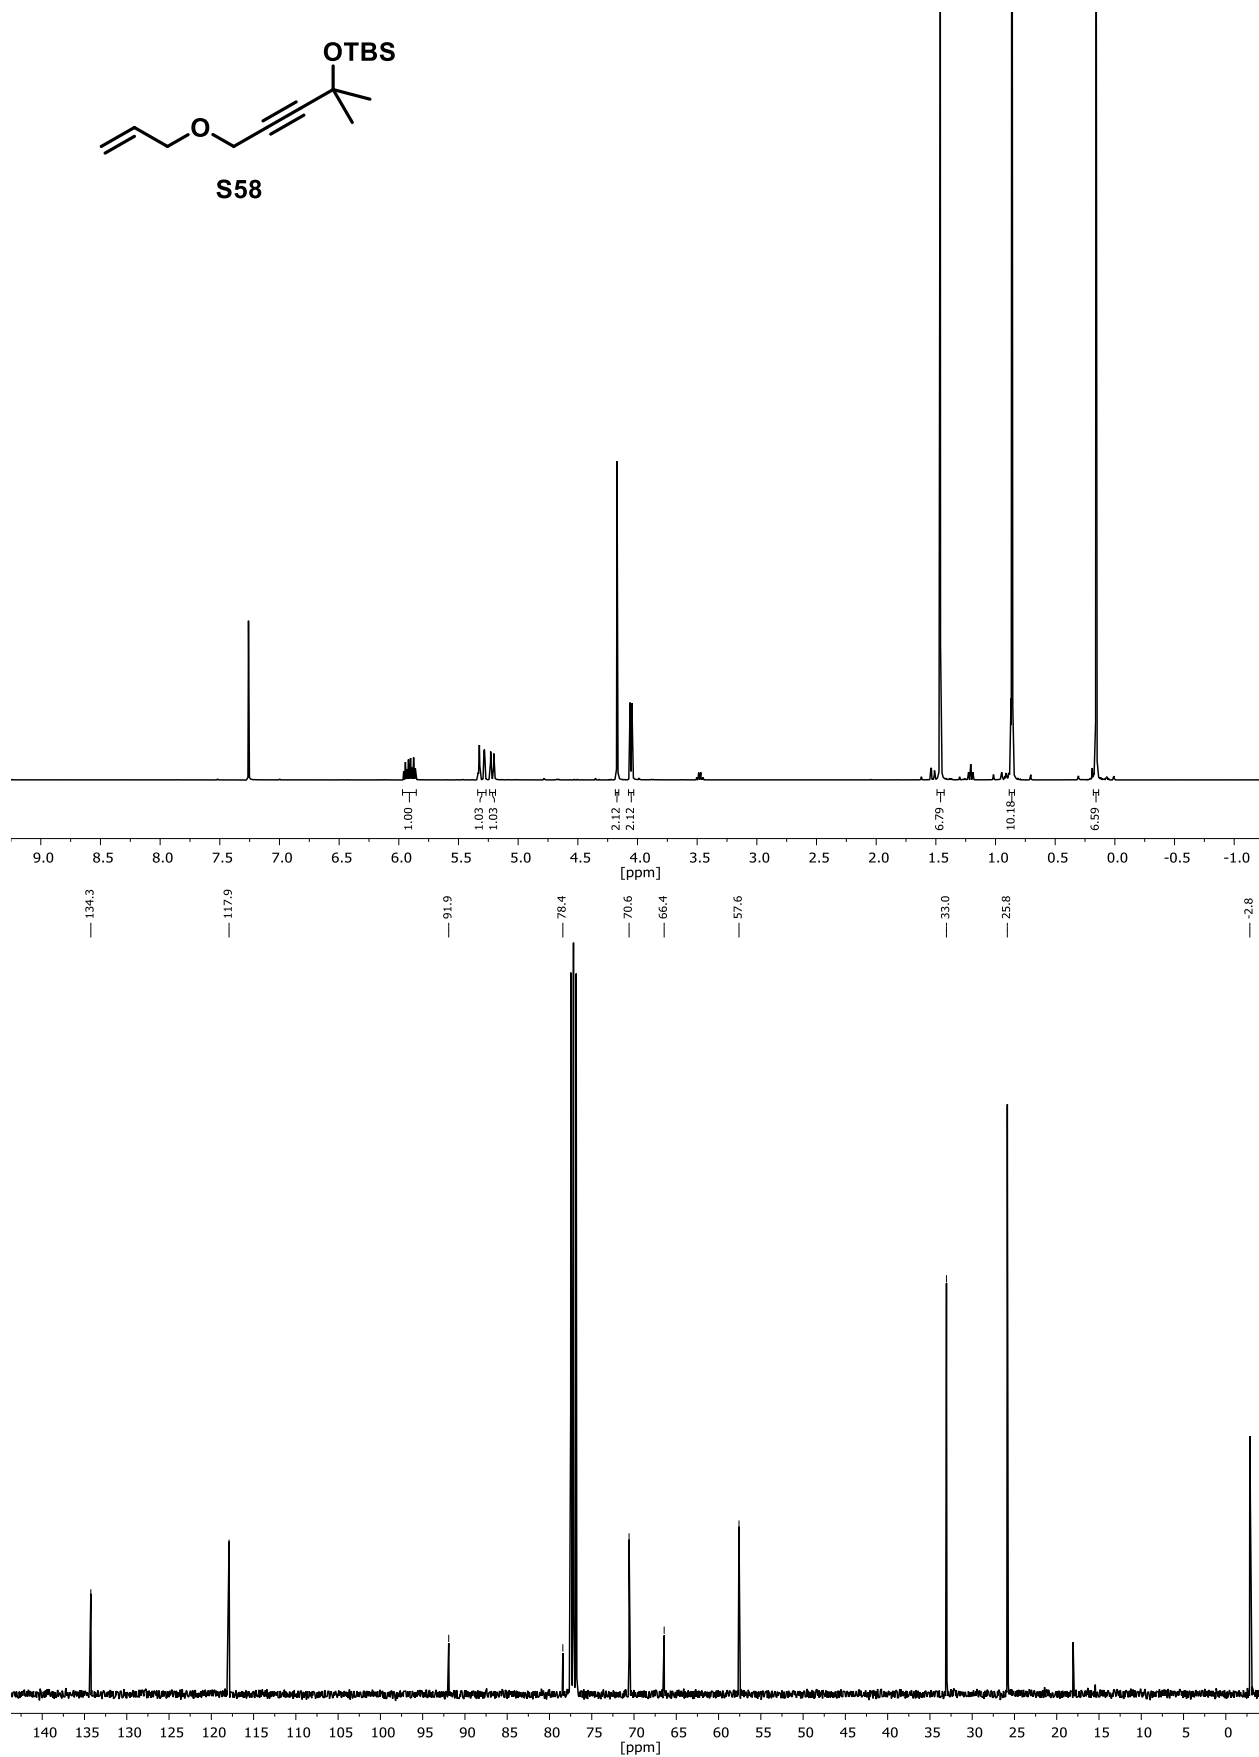

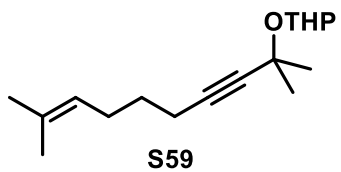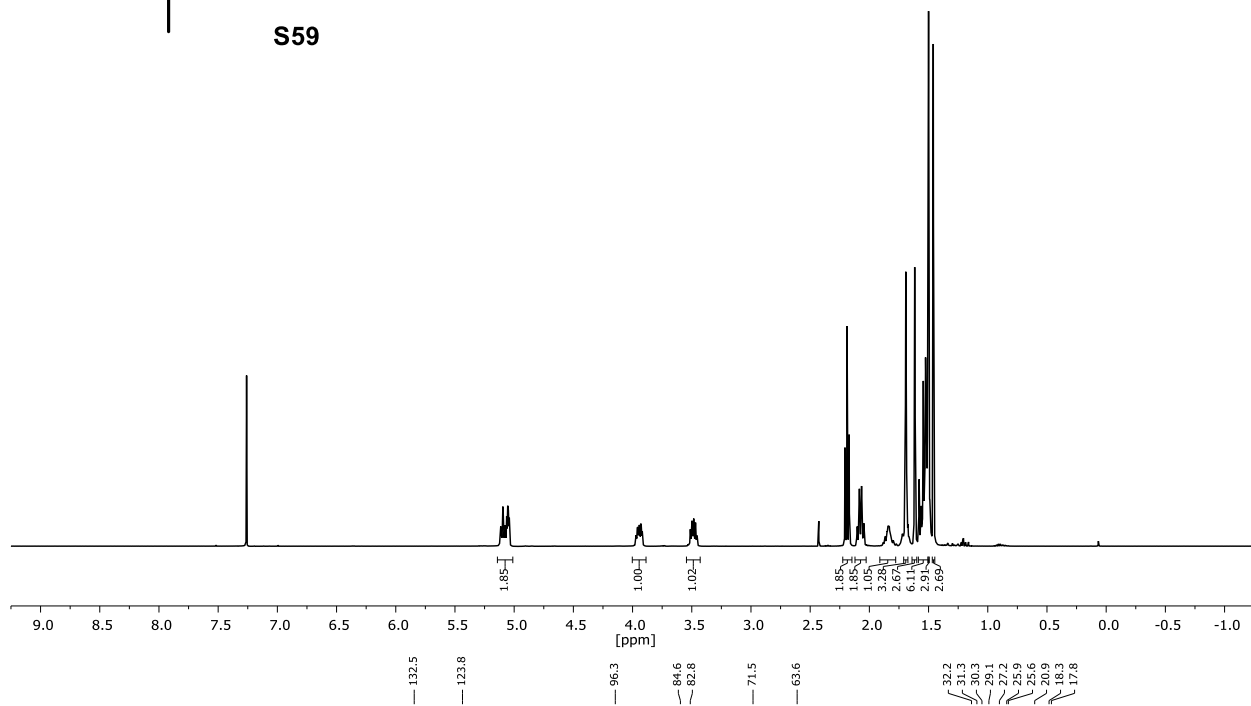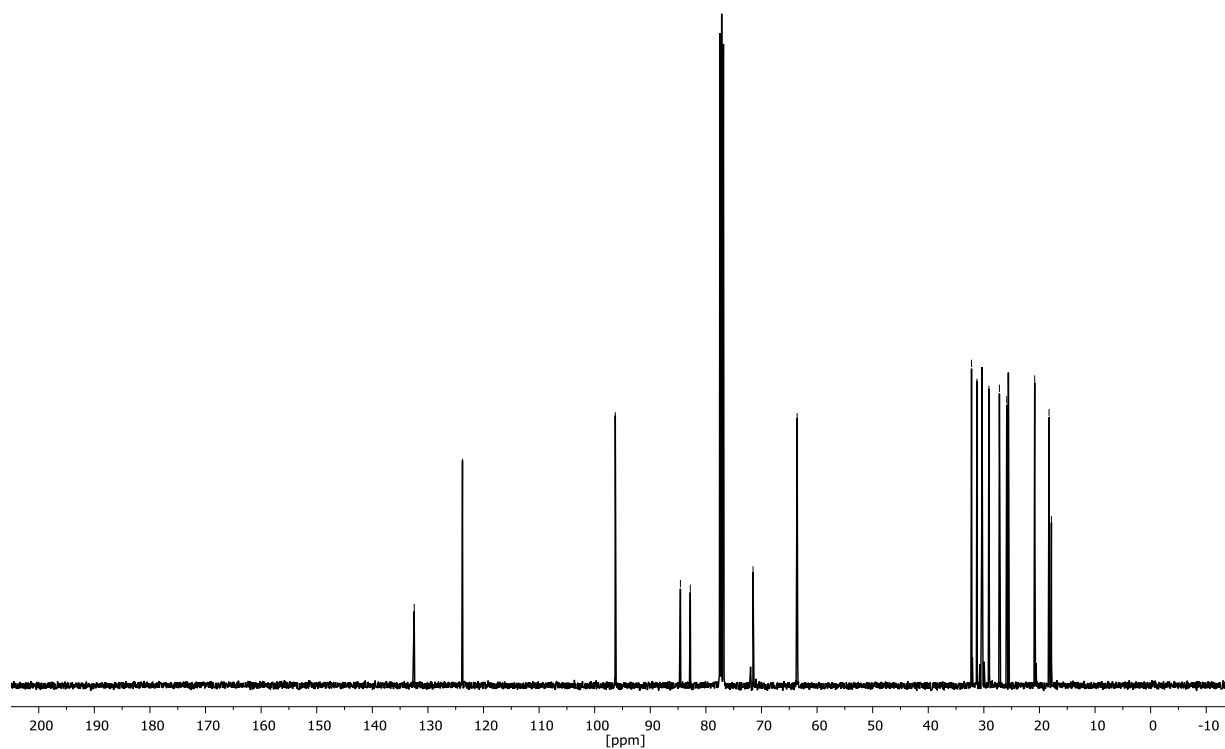



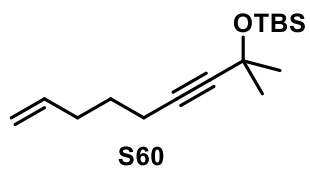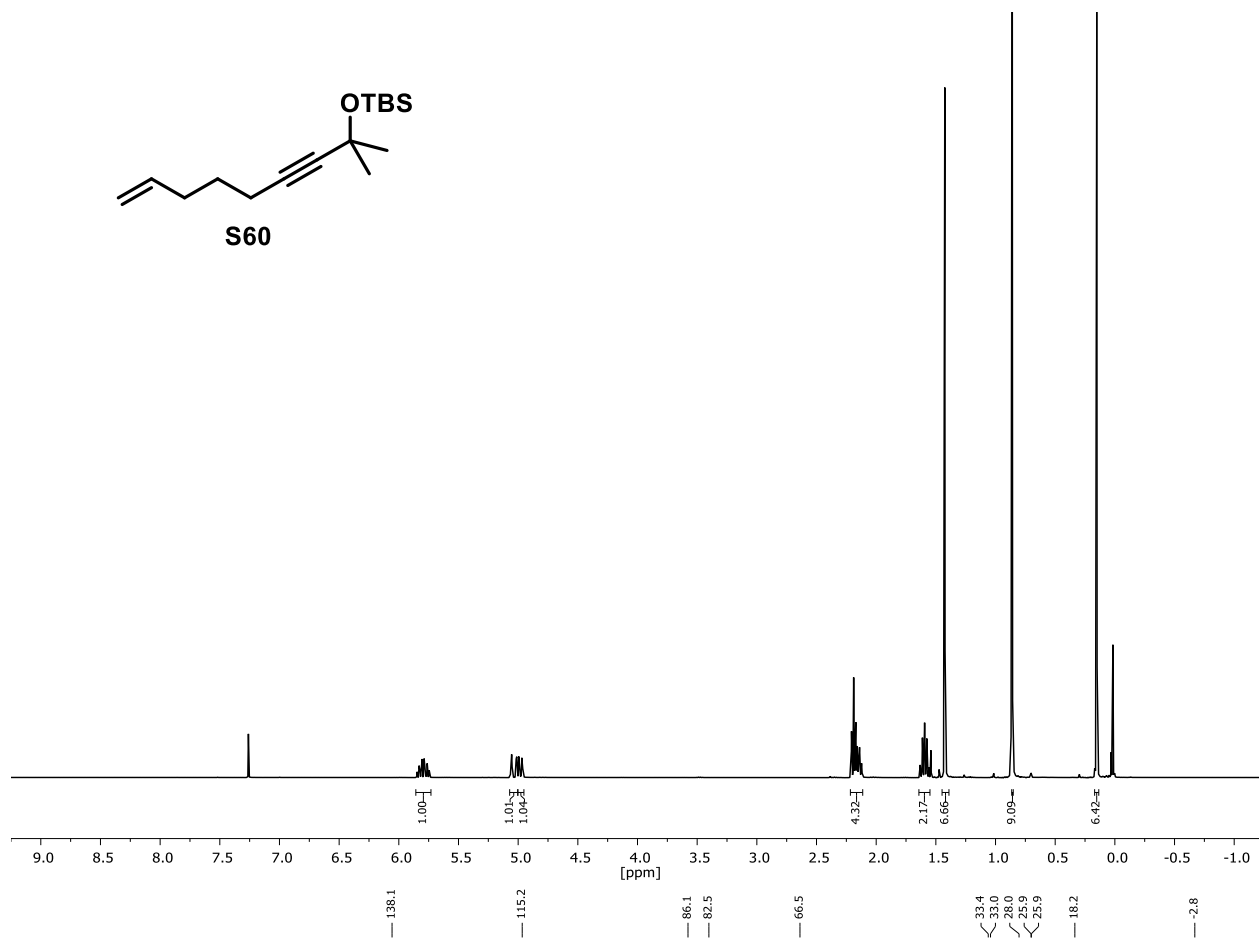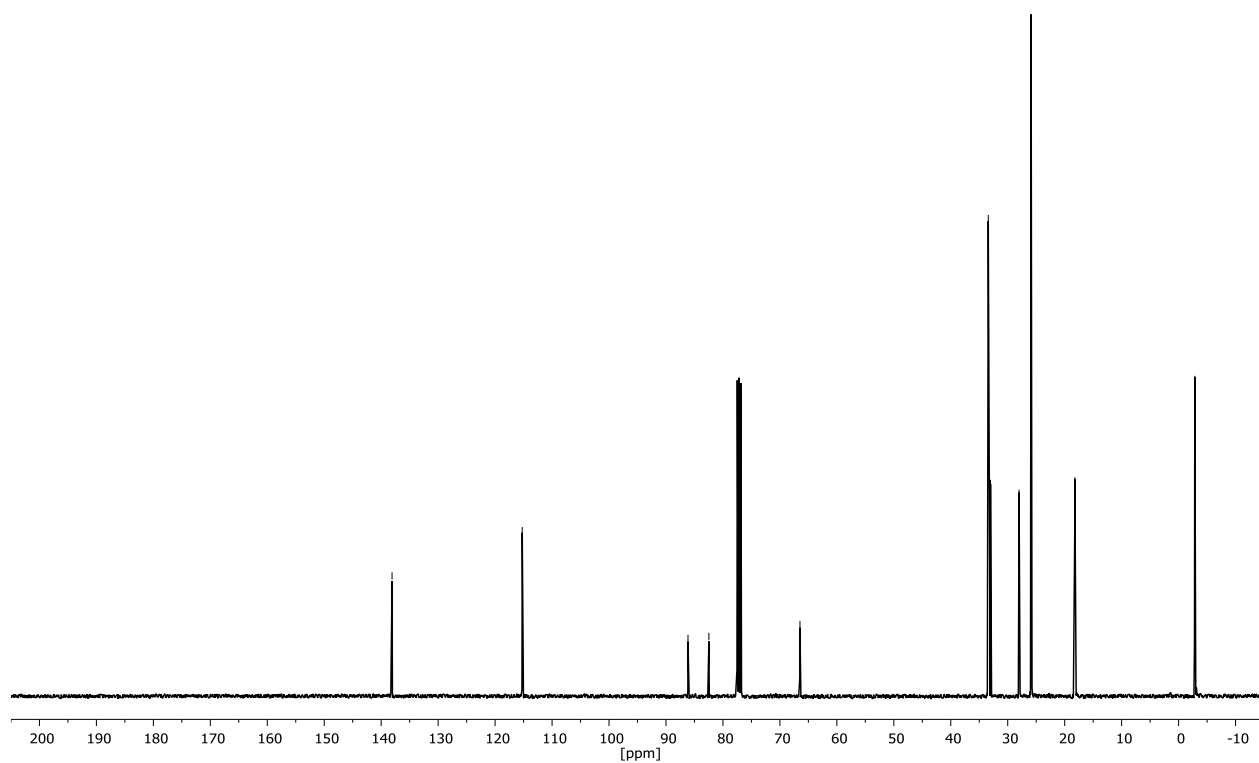

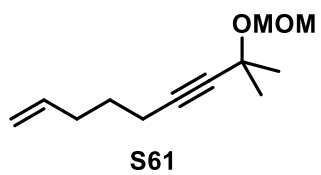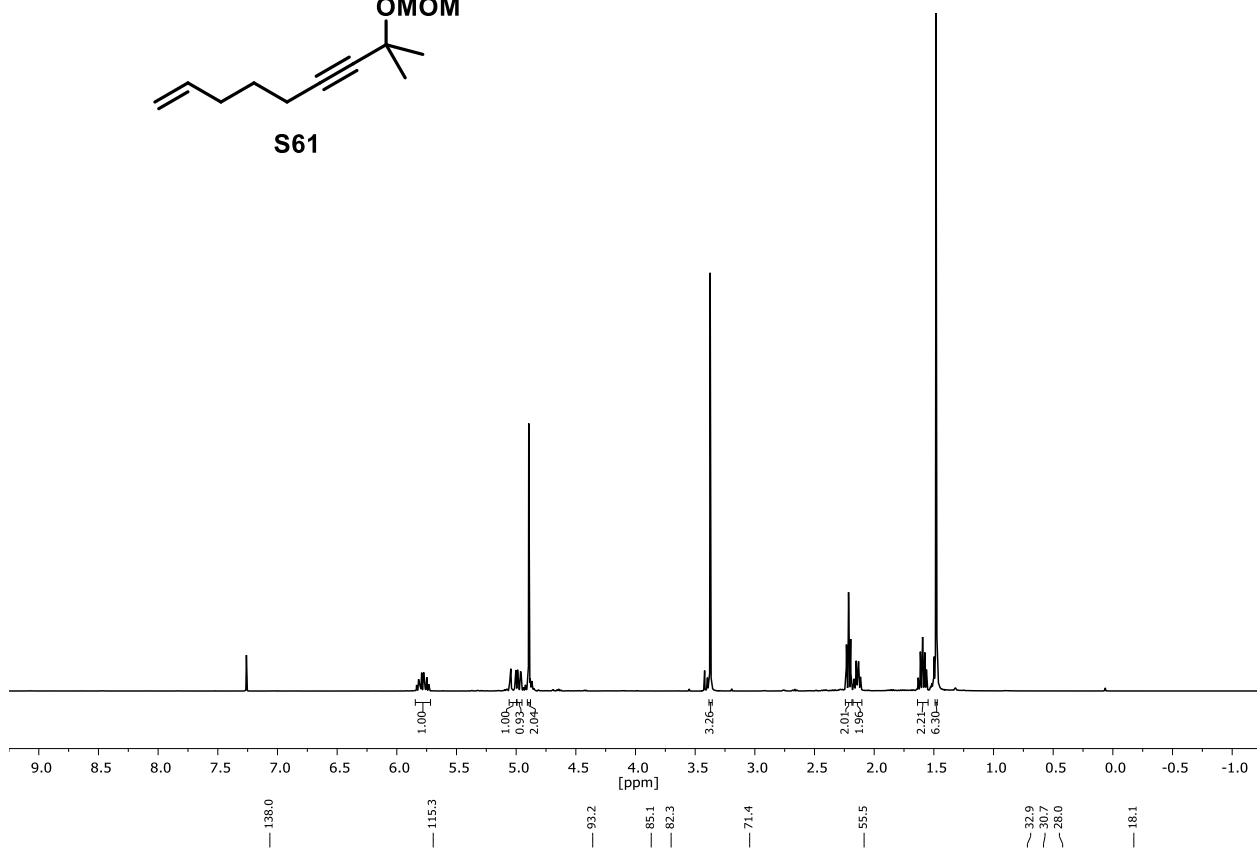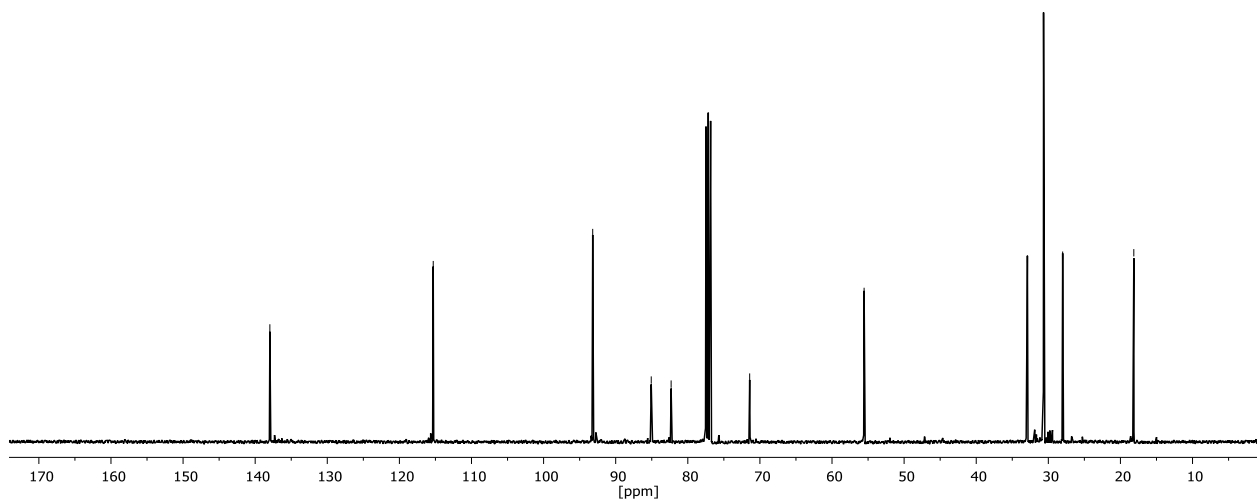

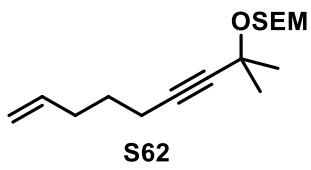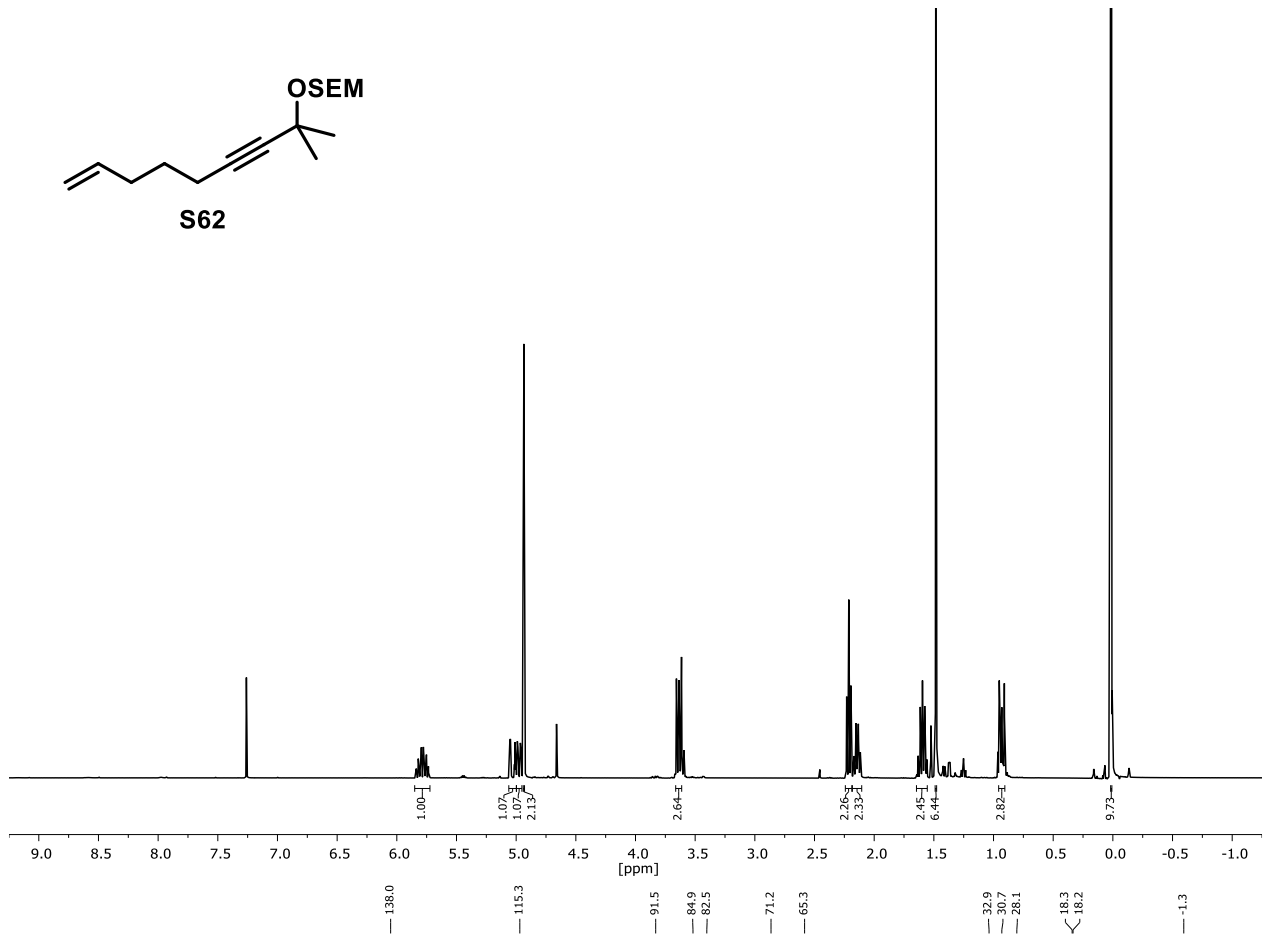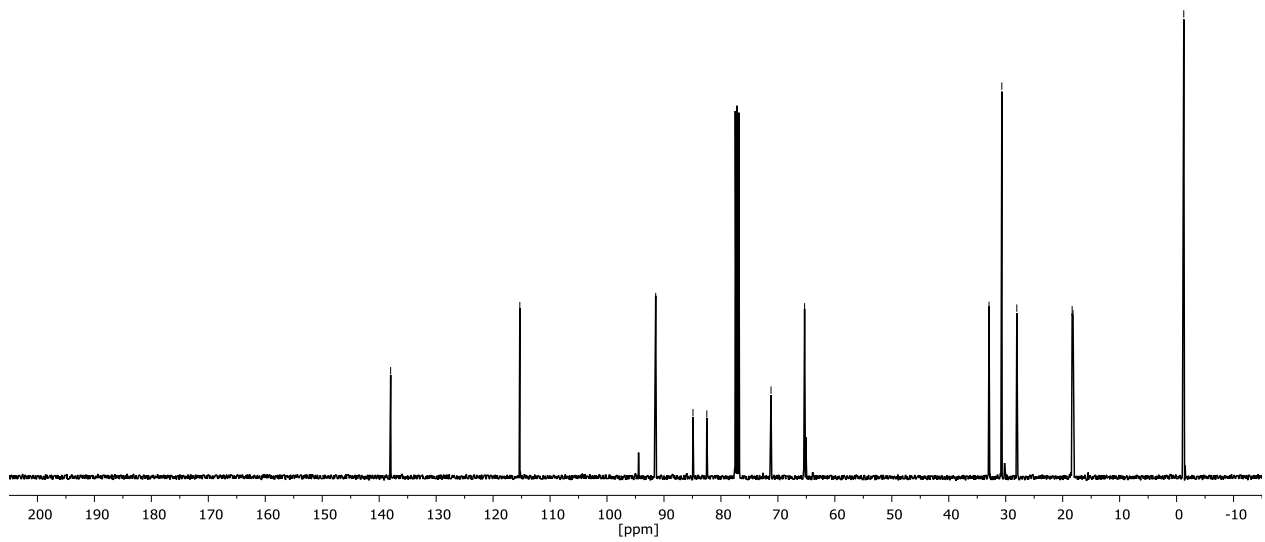

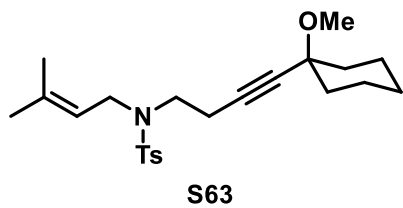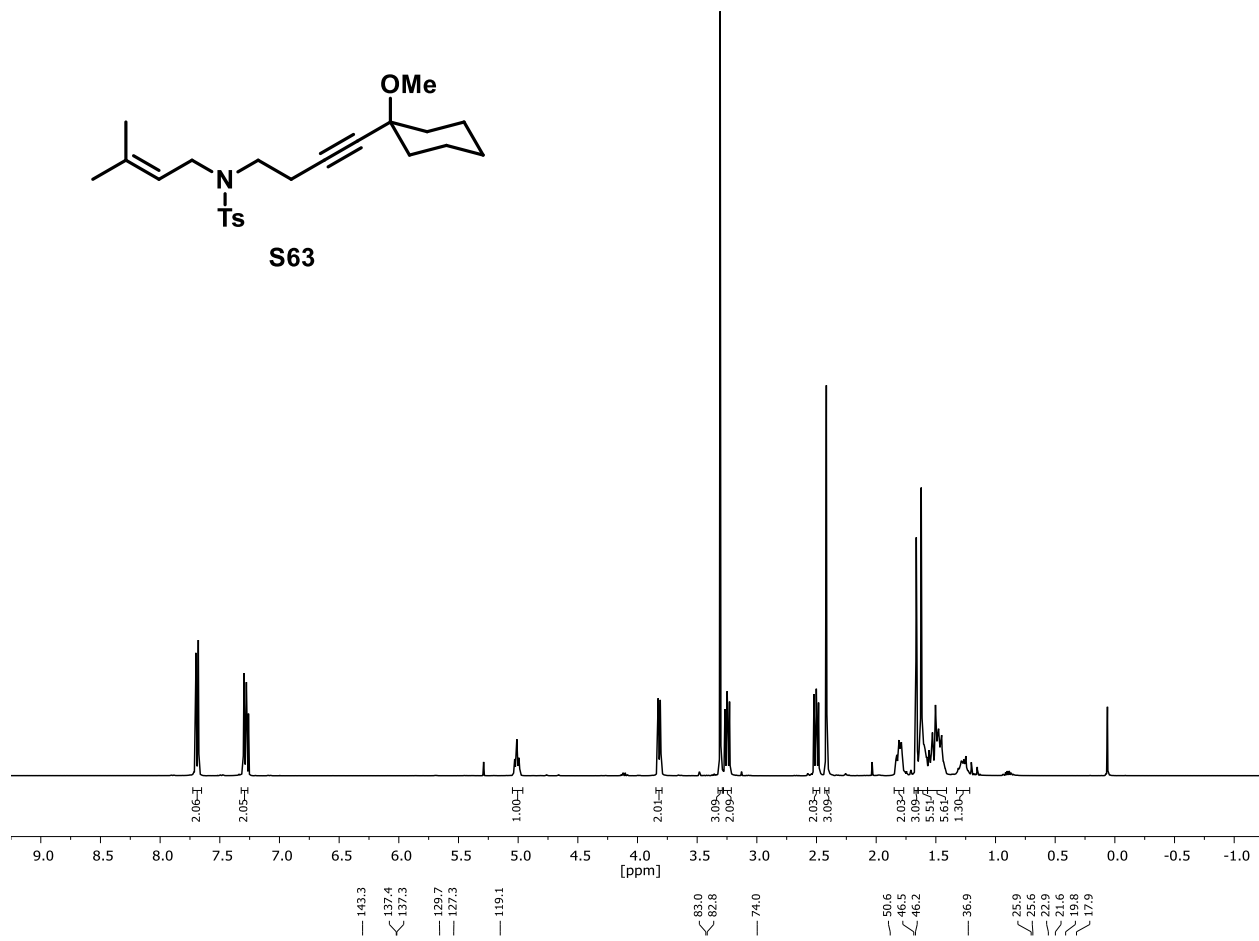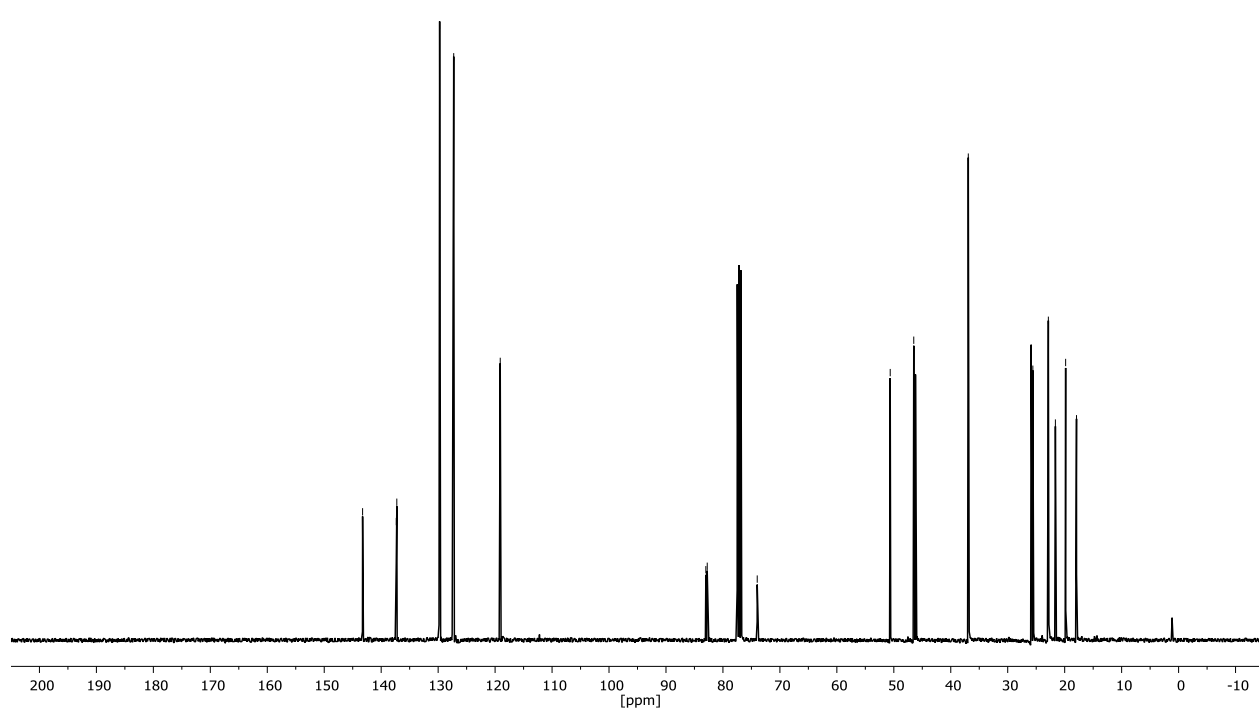

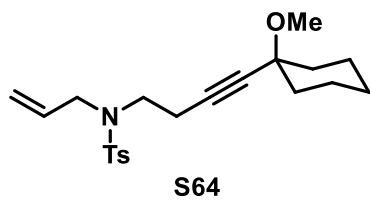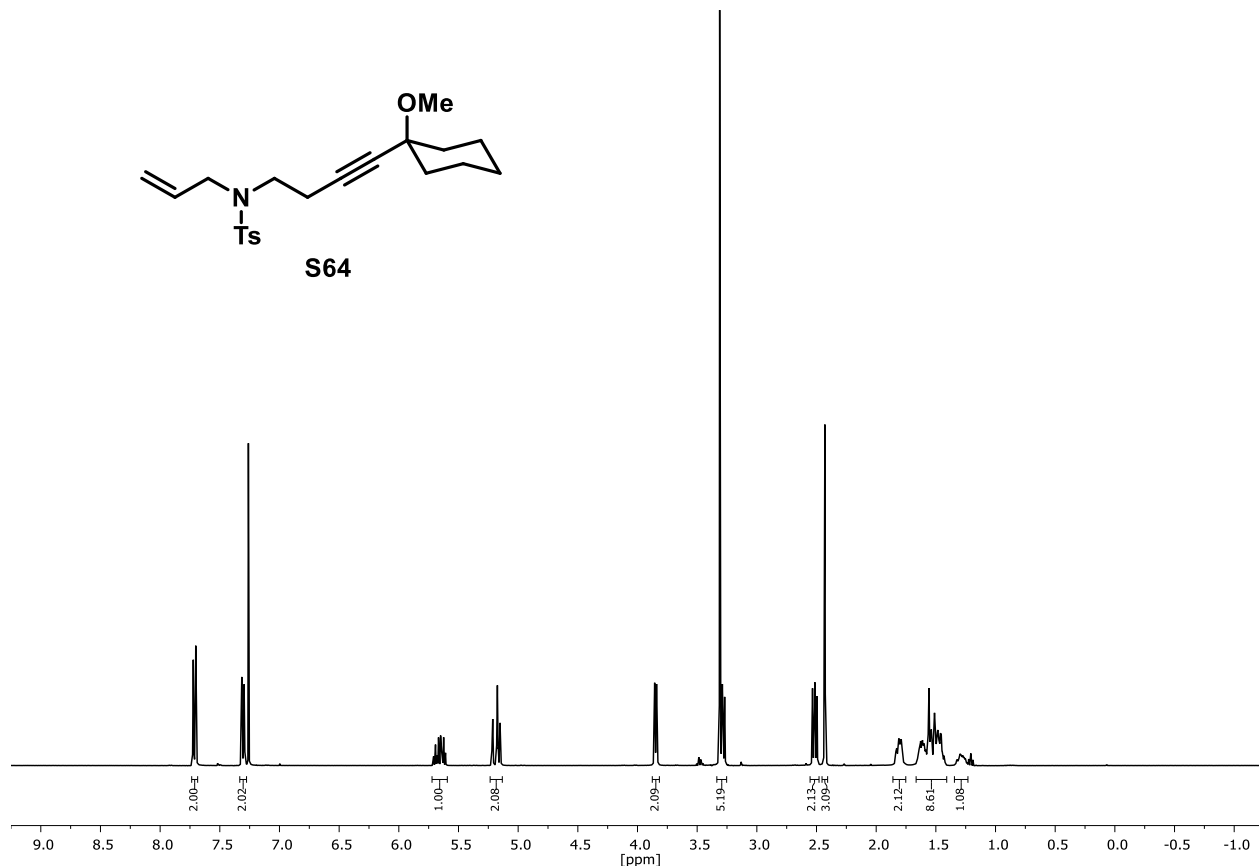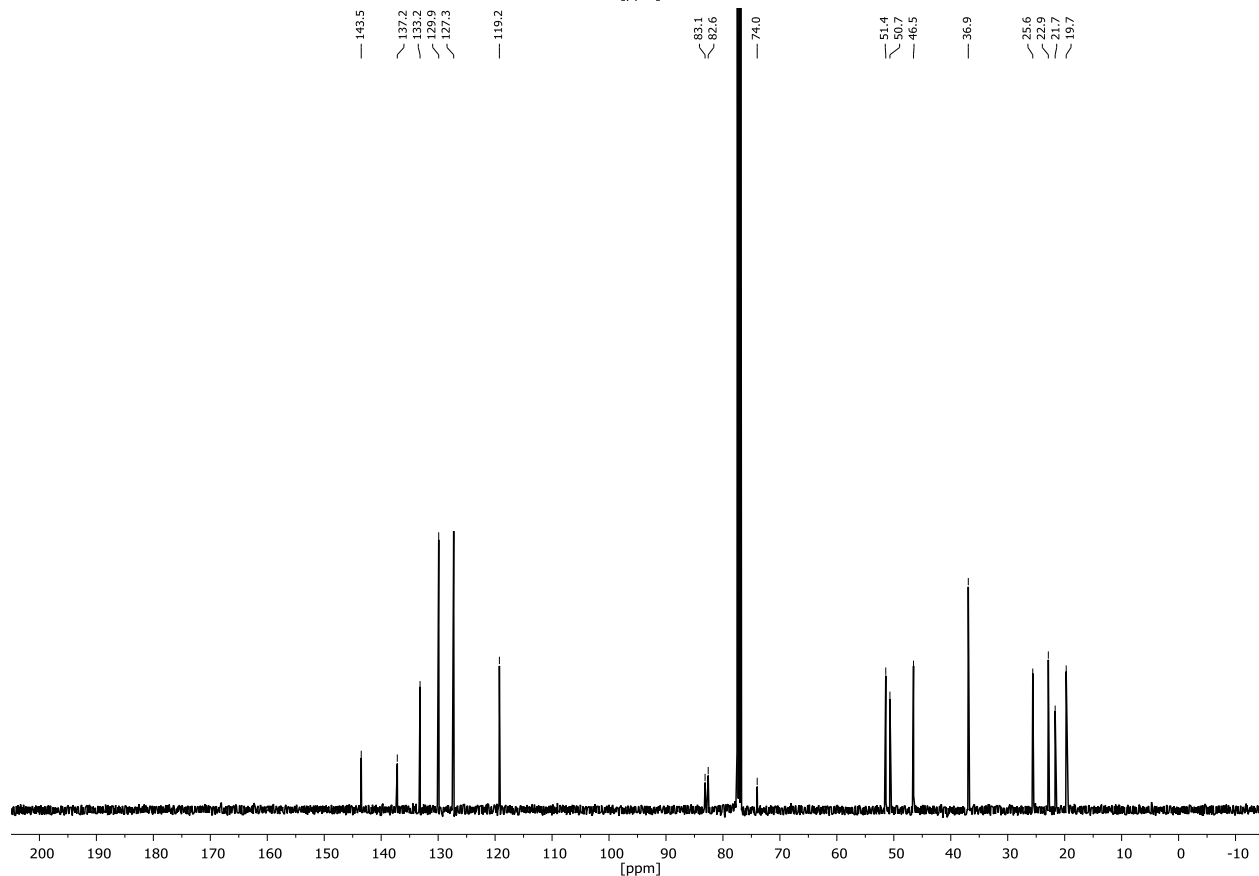

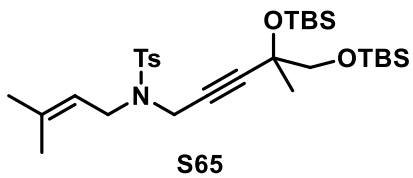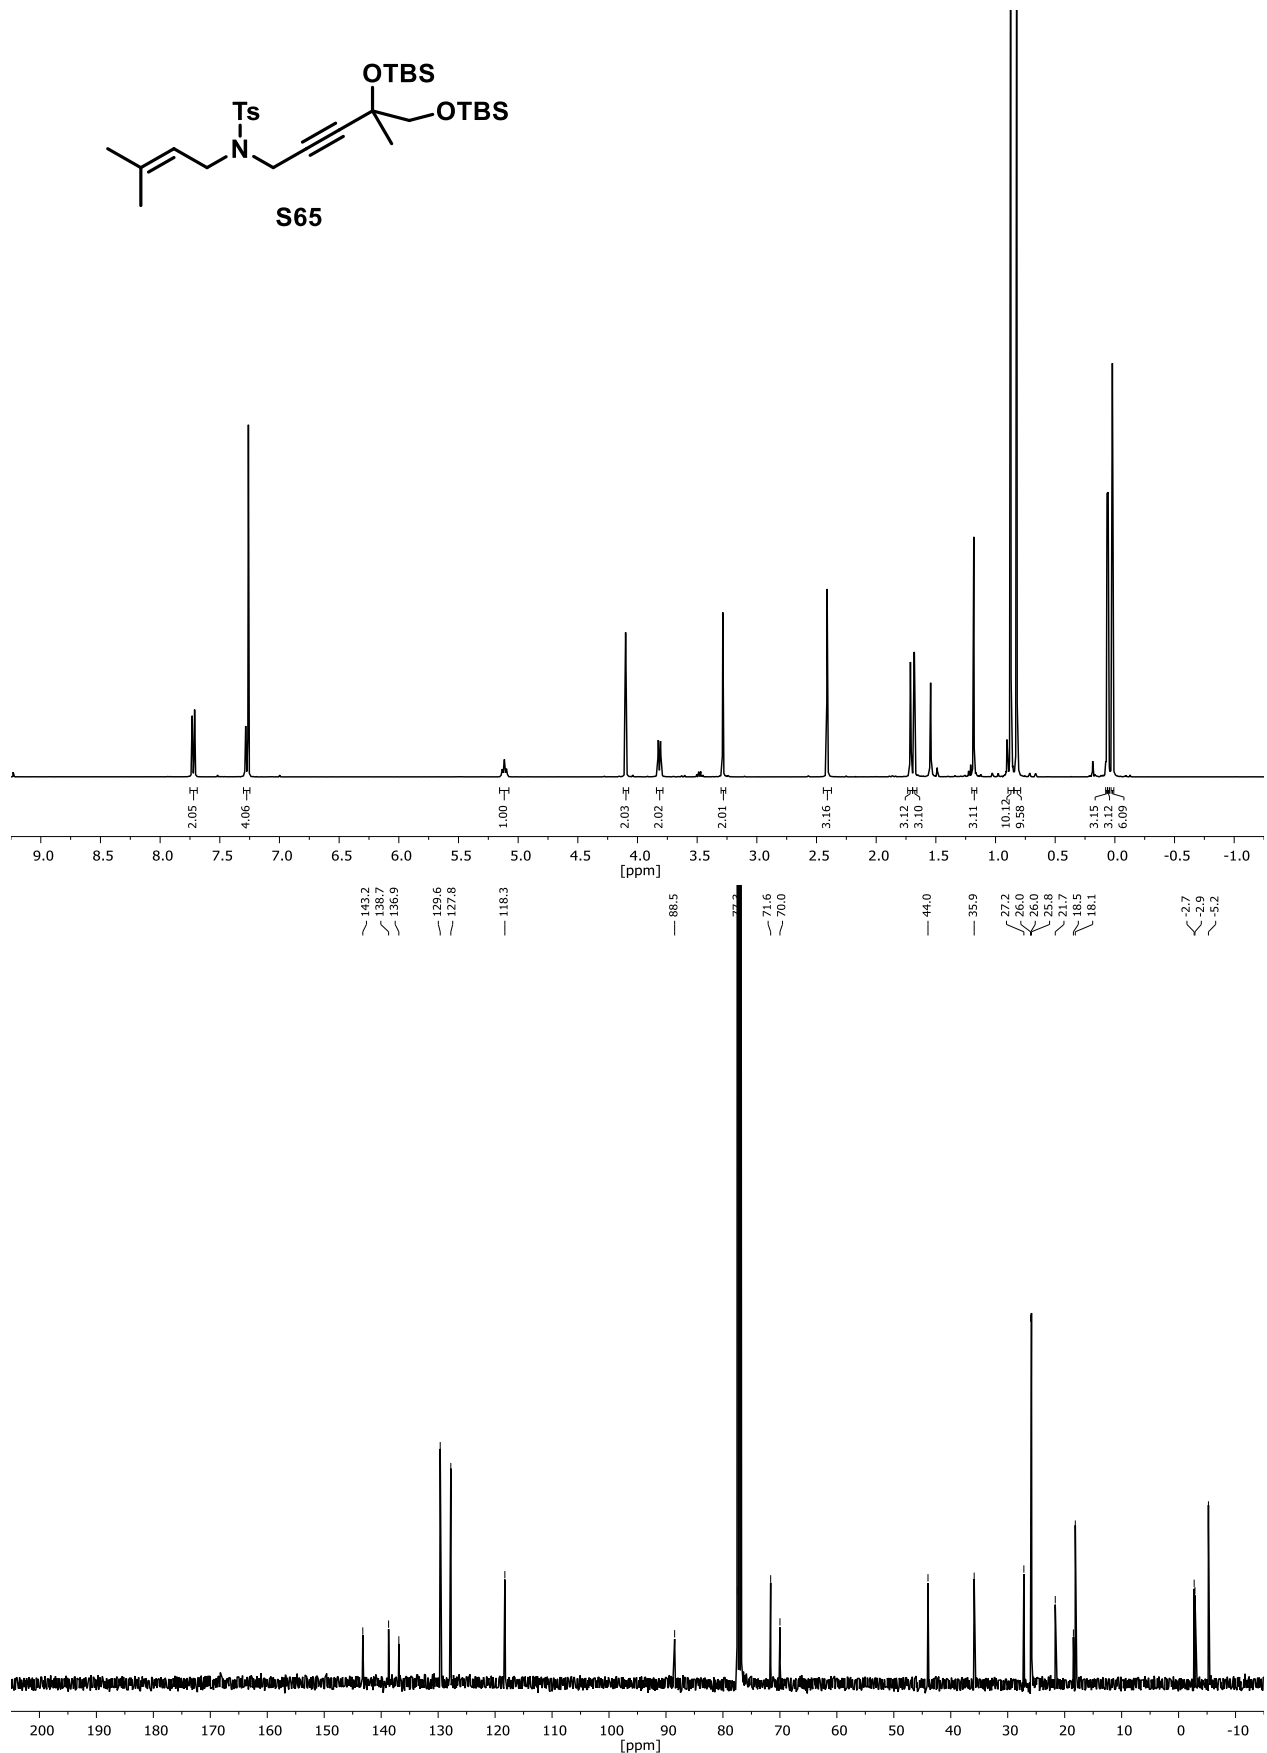

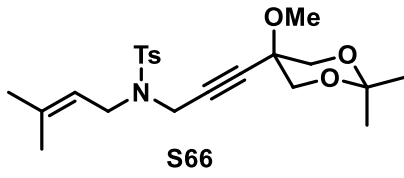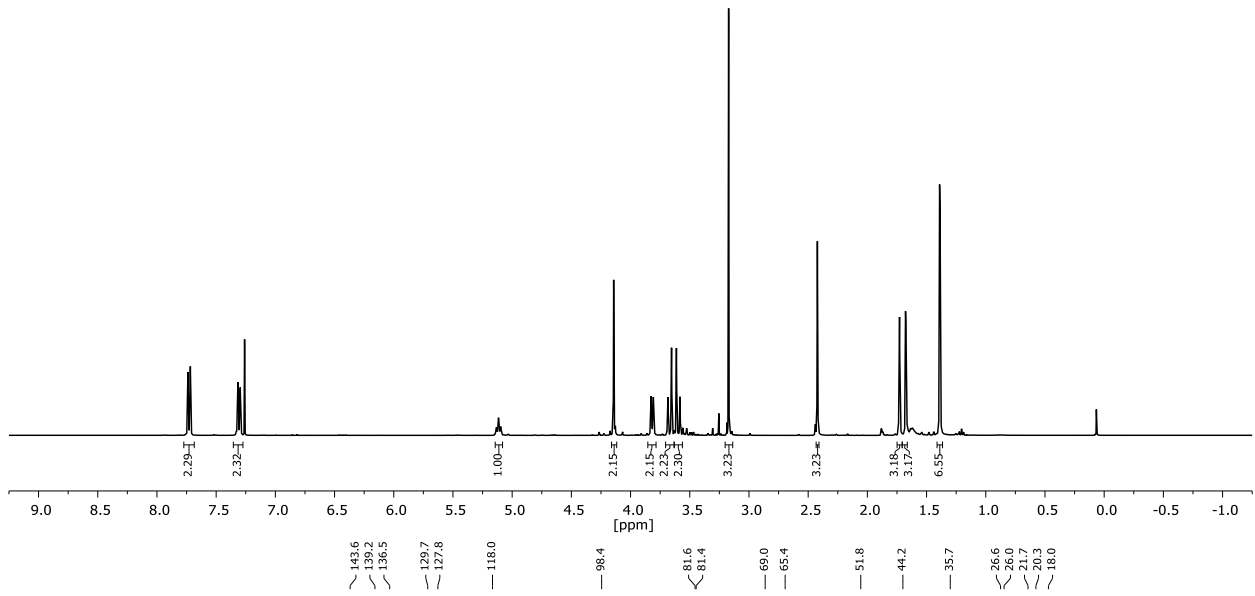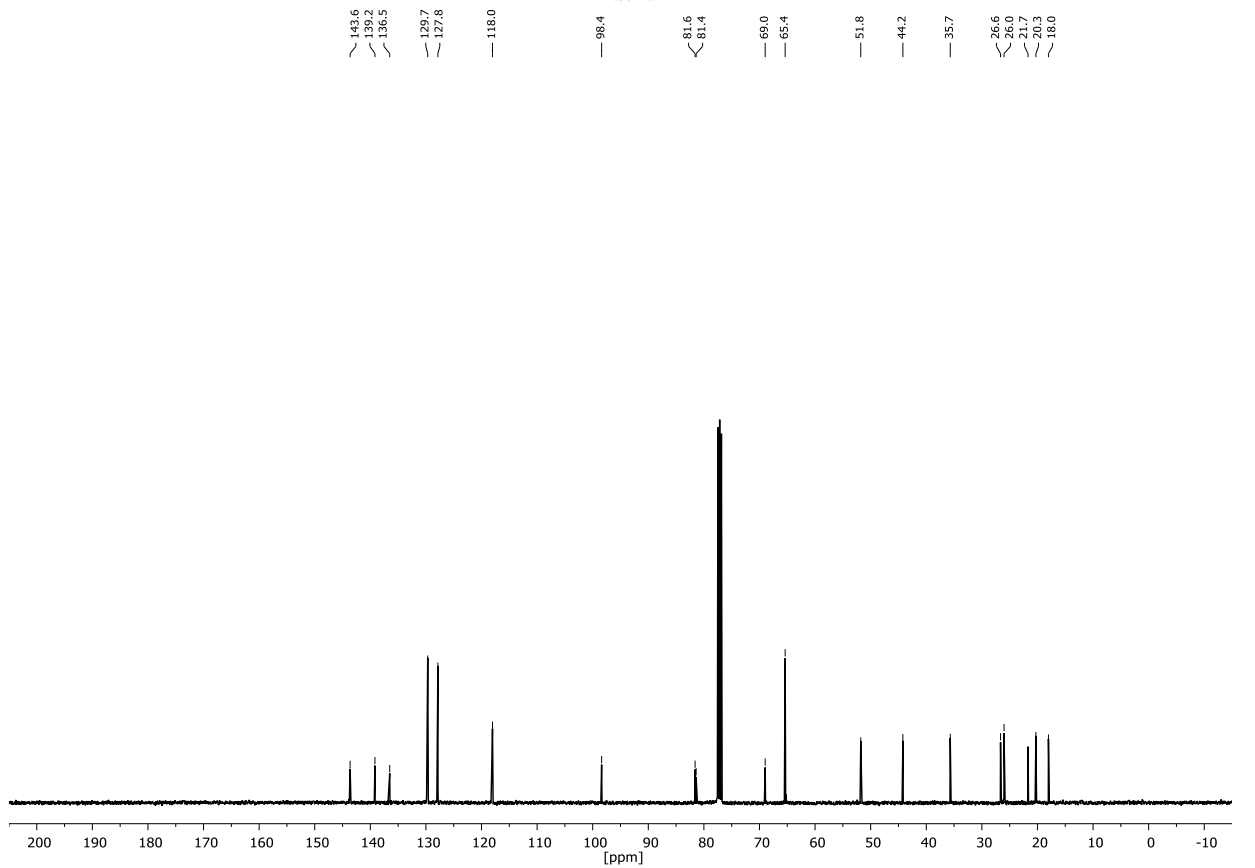

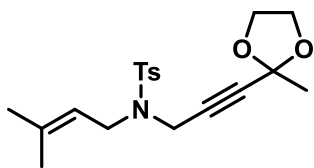

S67

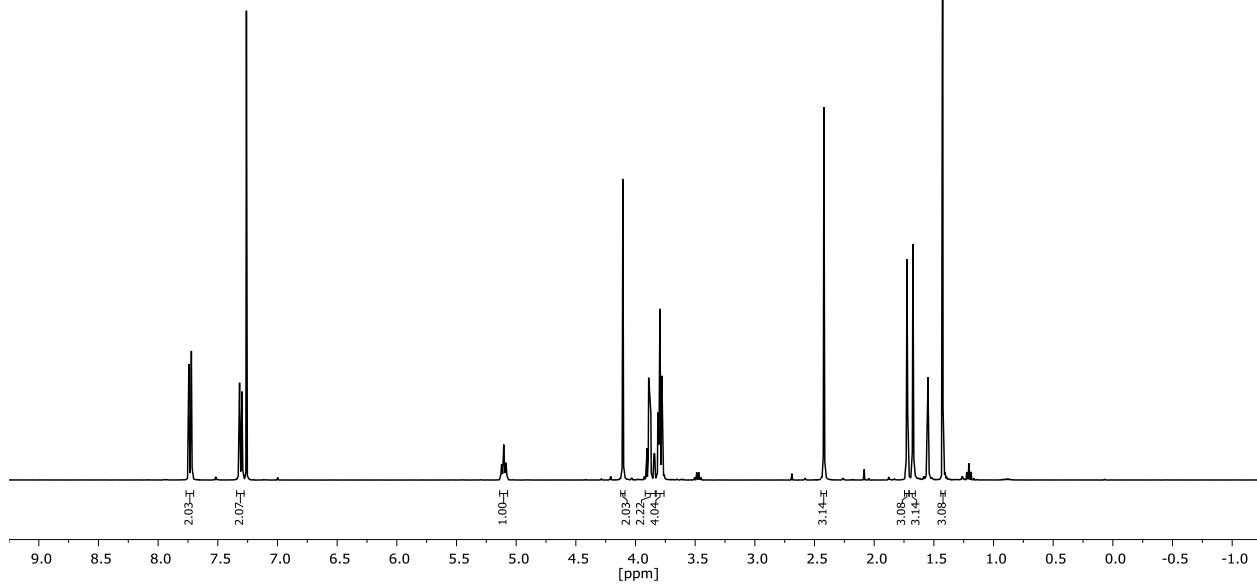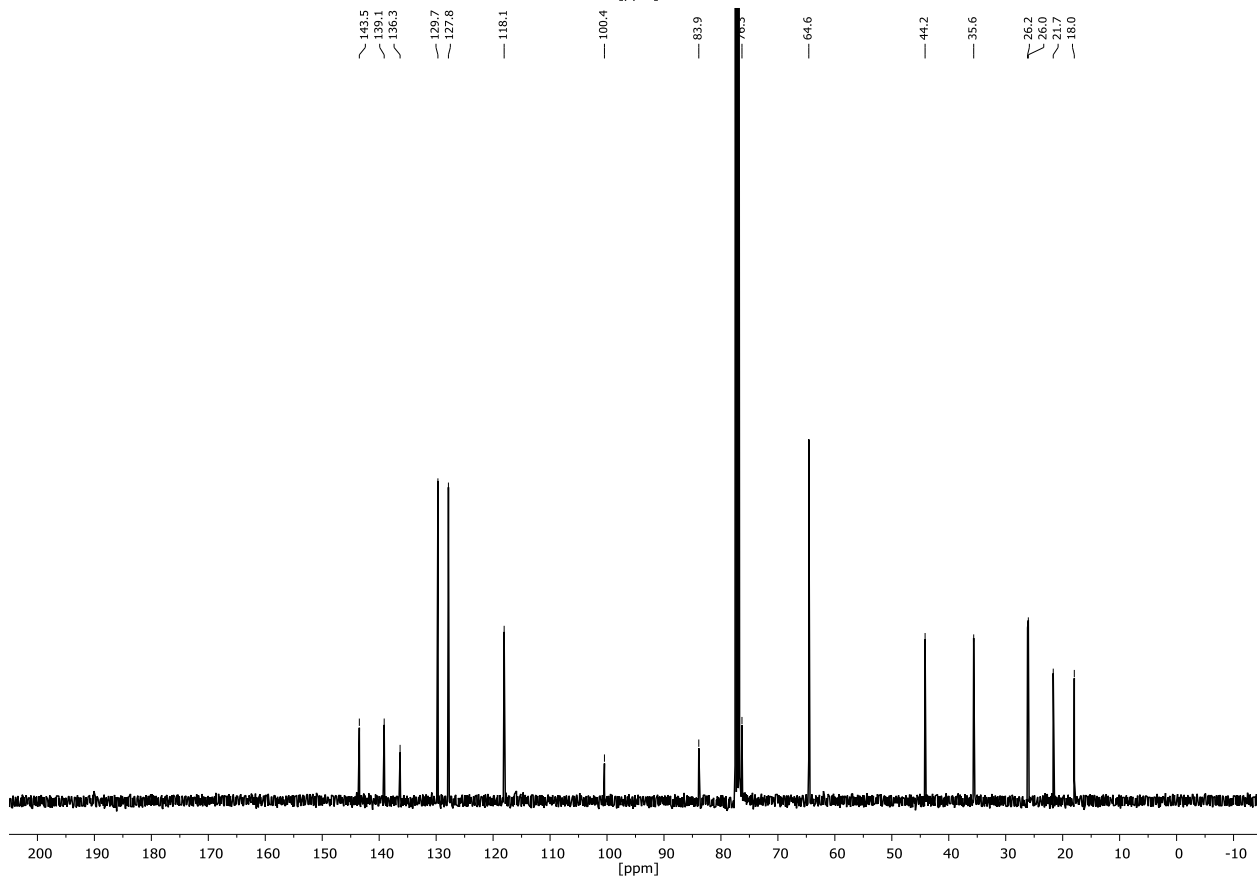



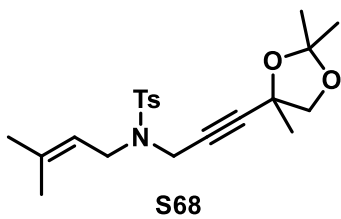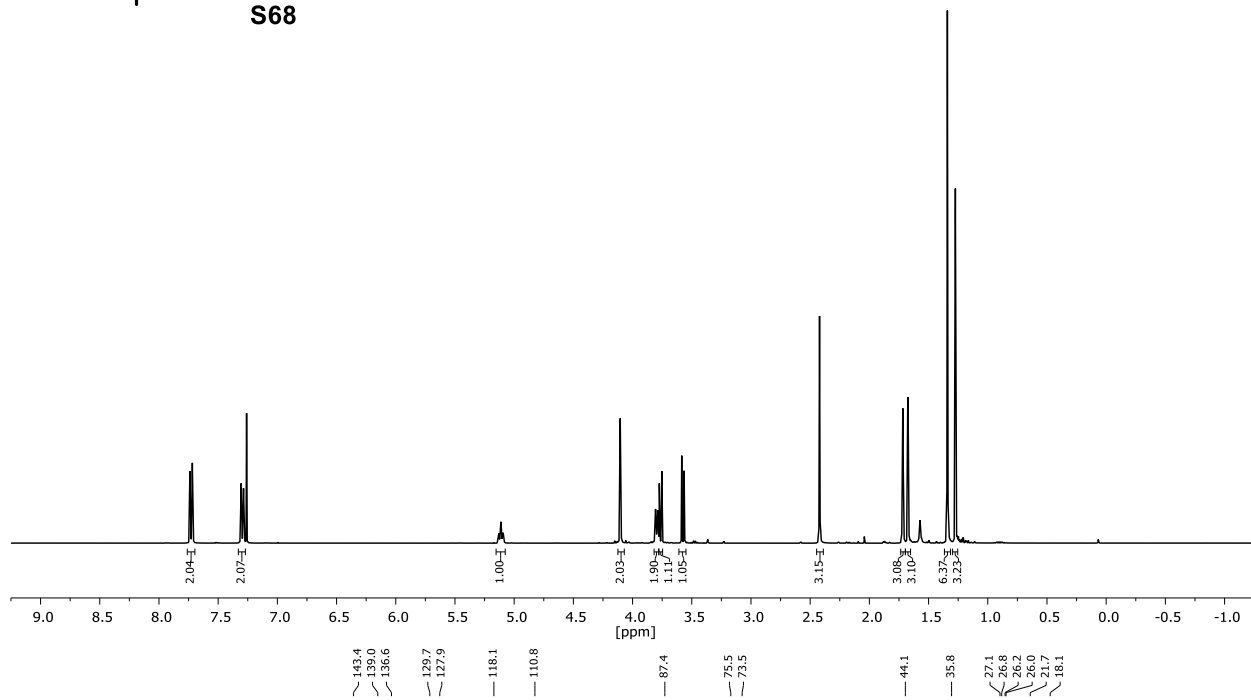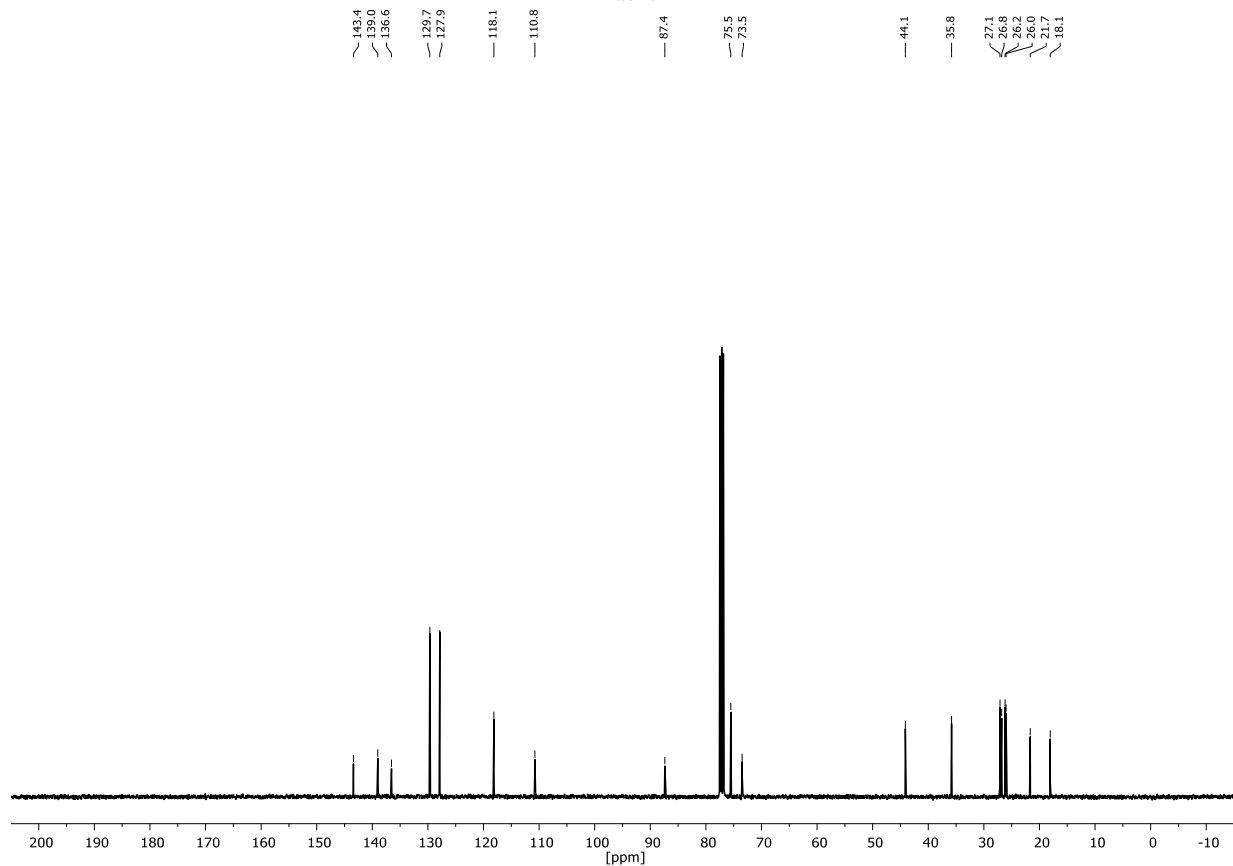

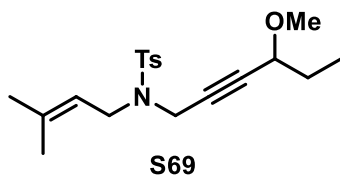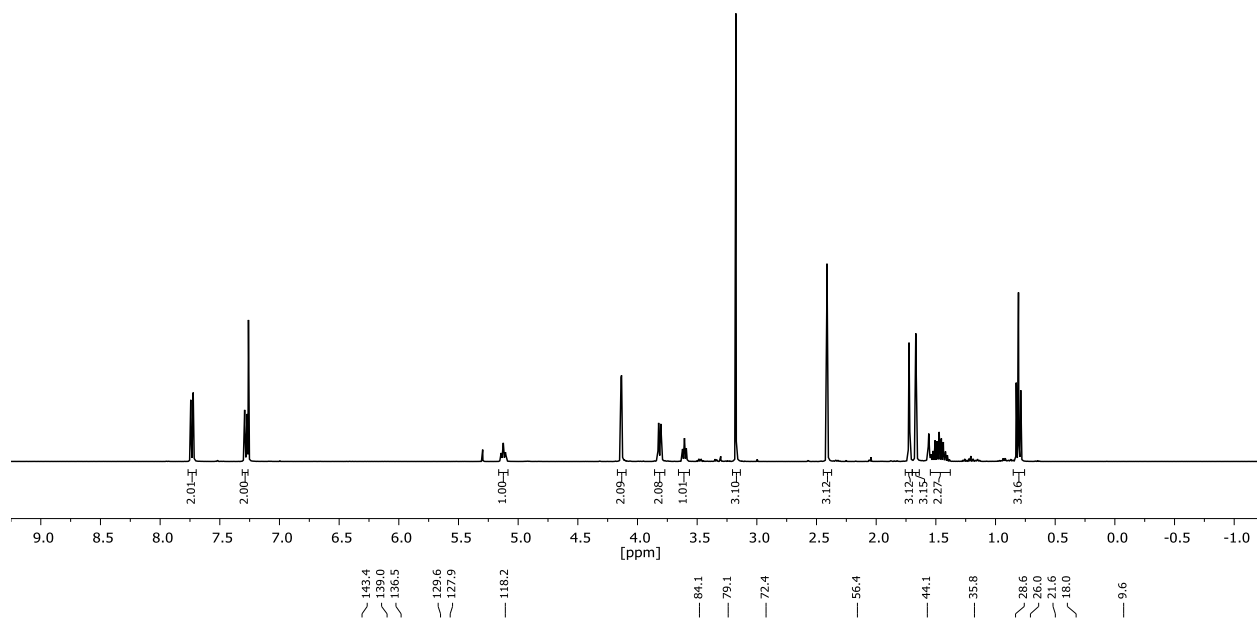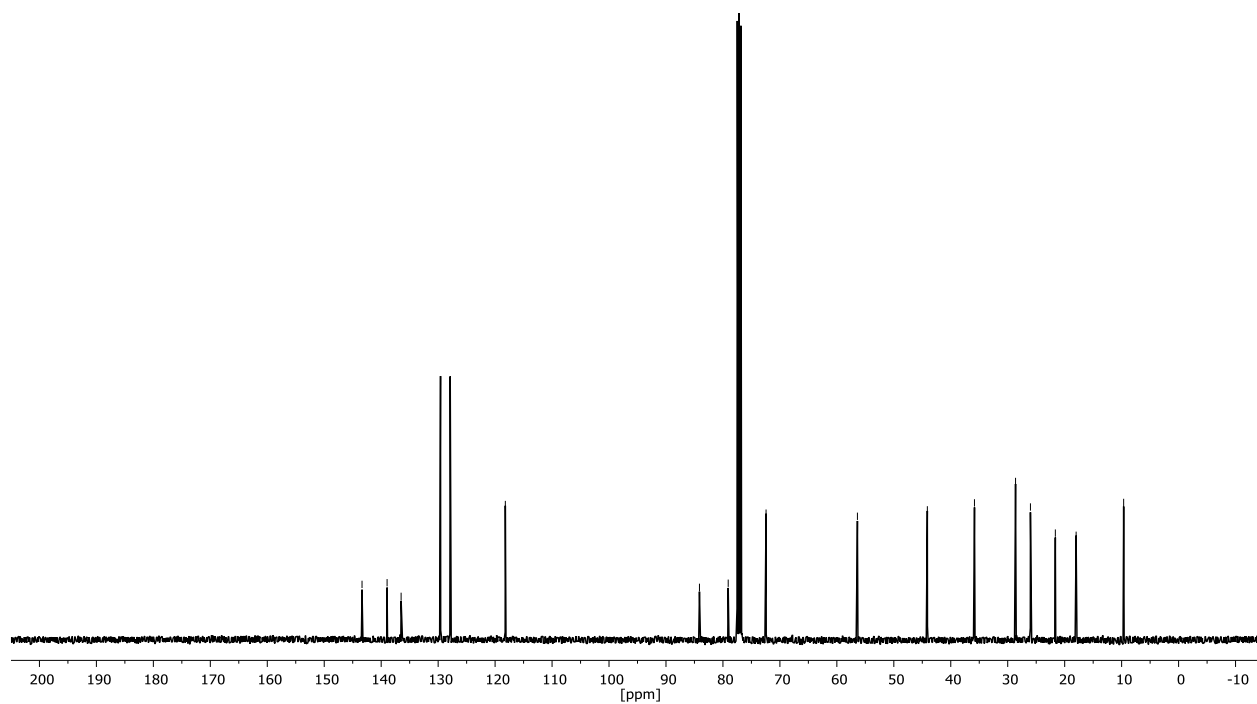

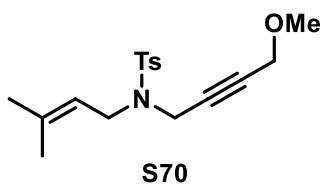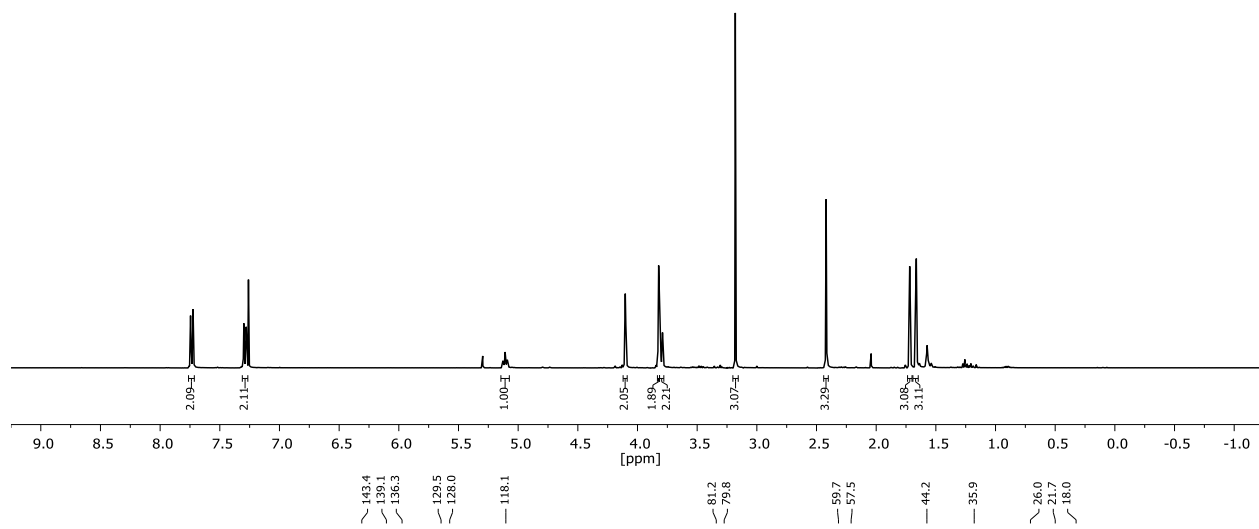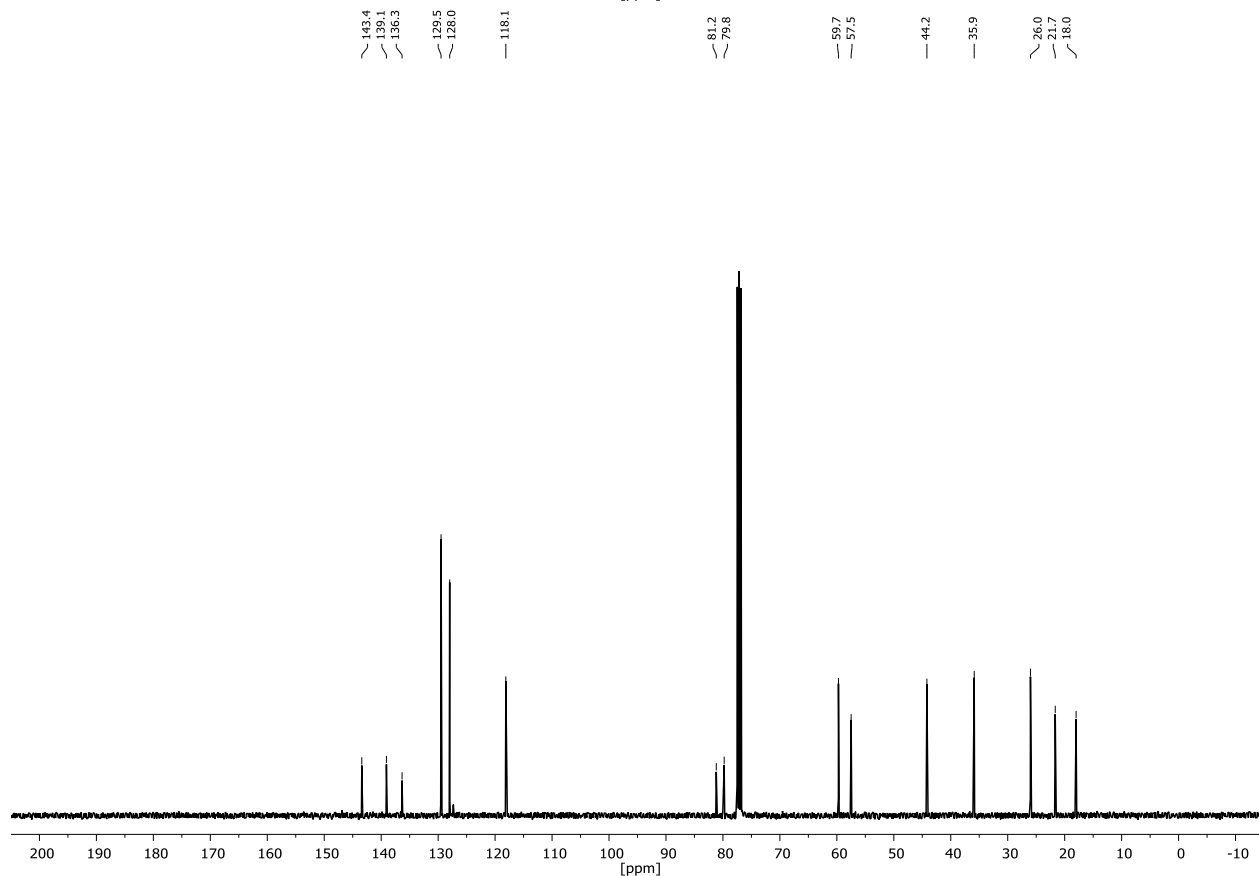

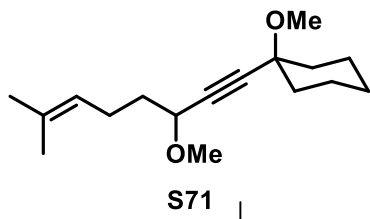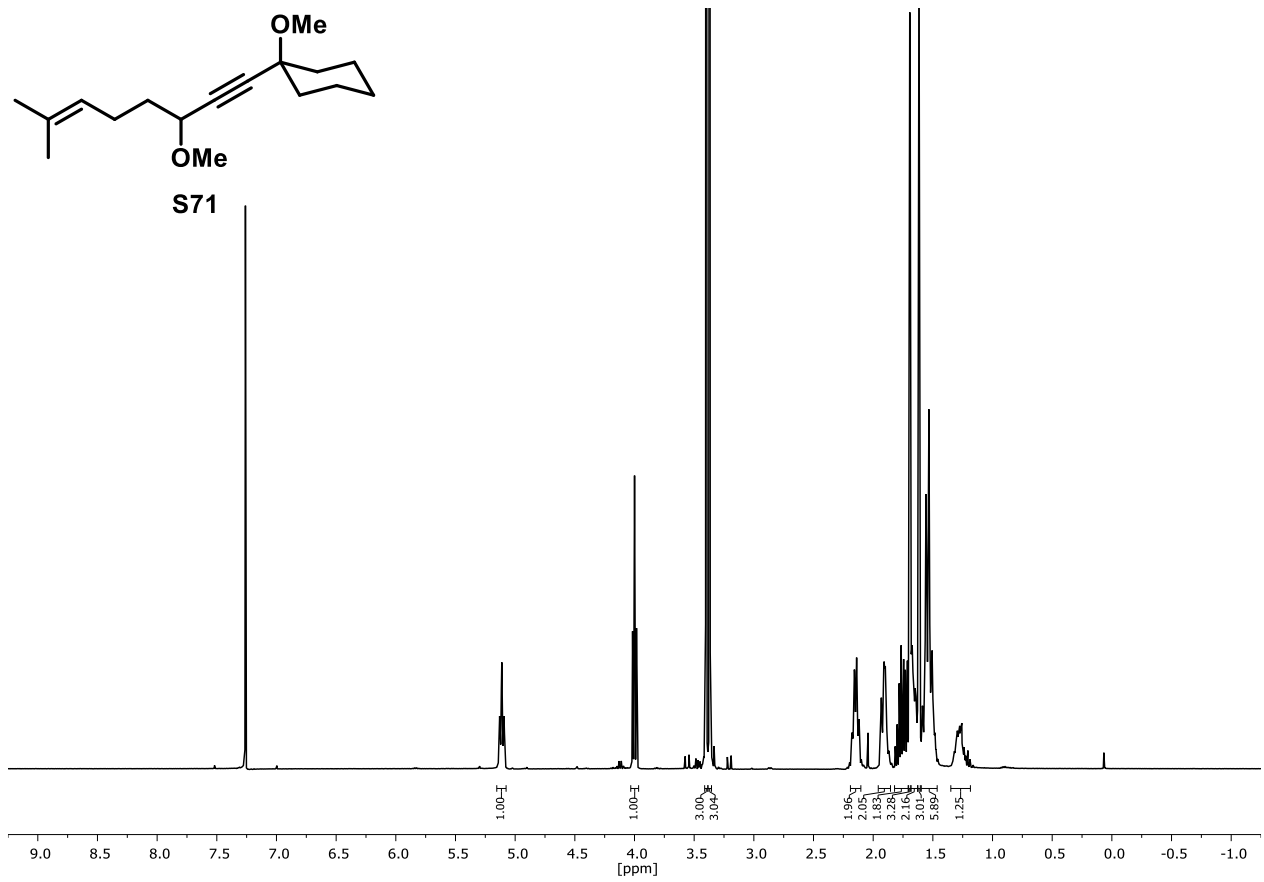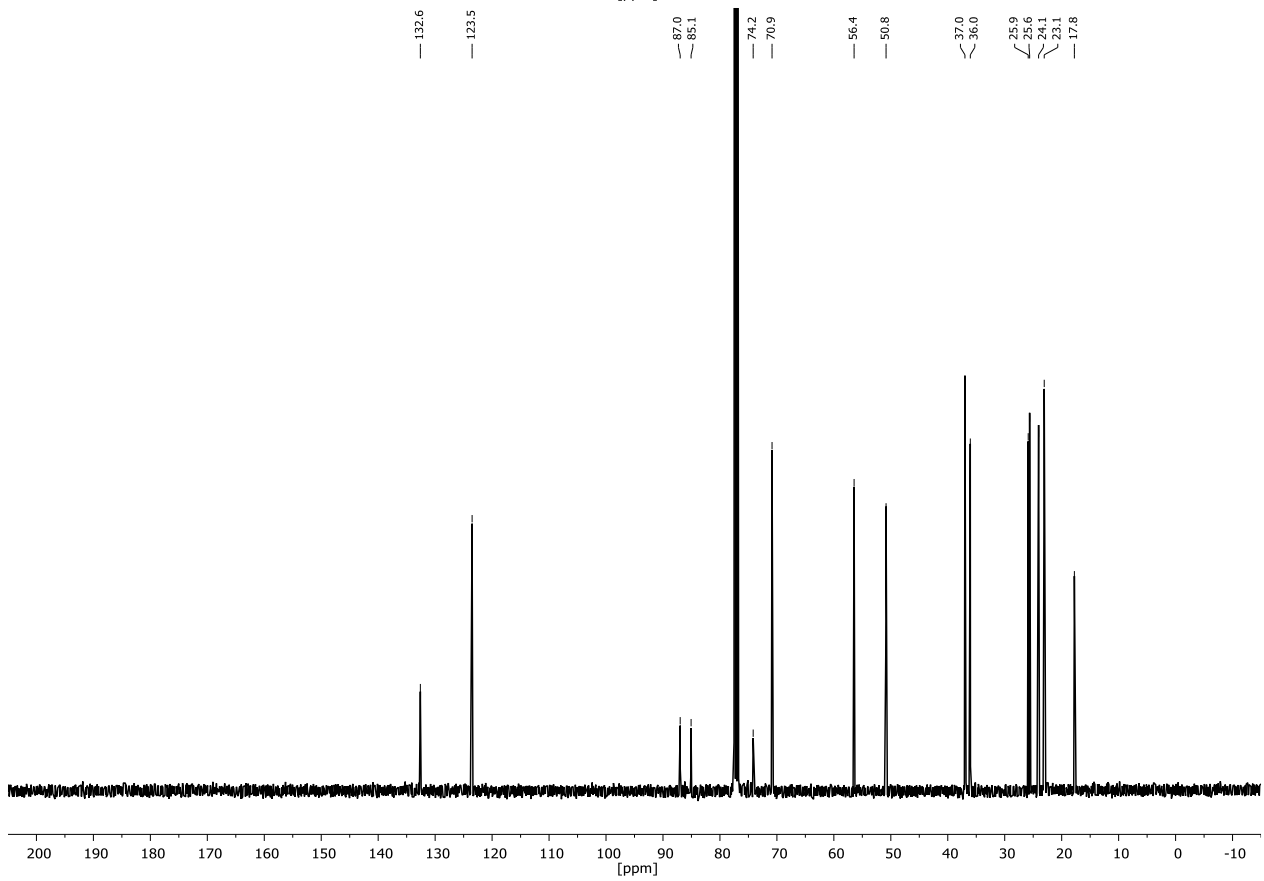

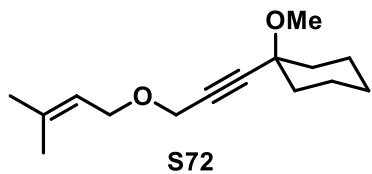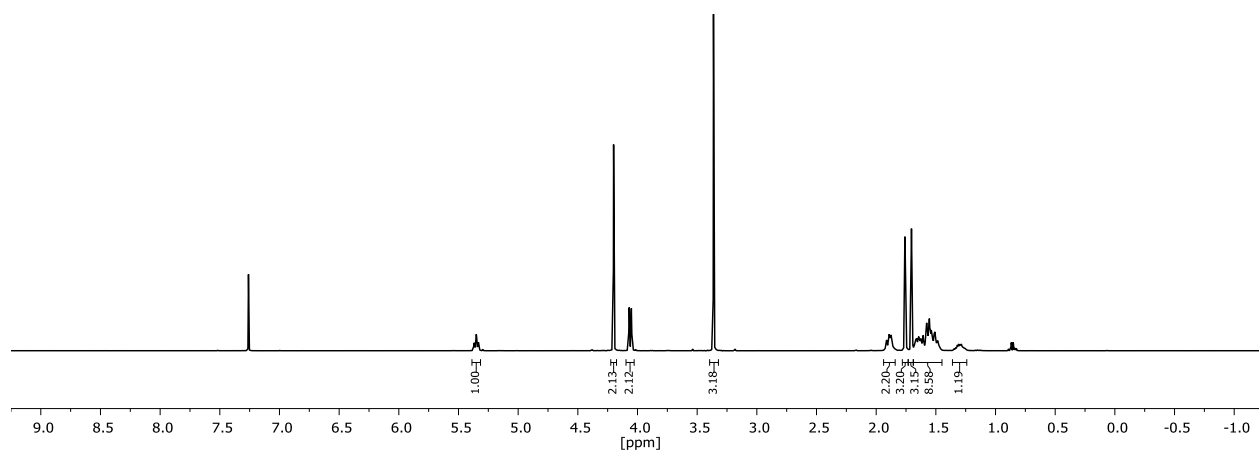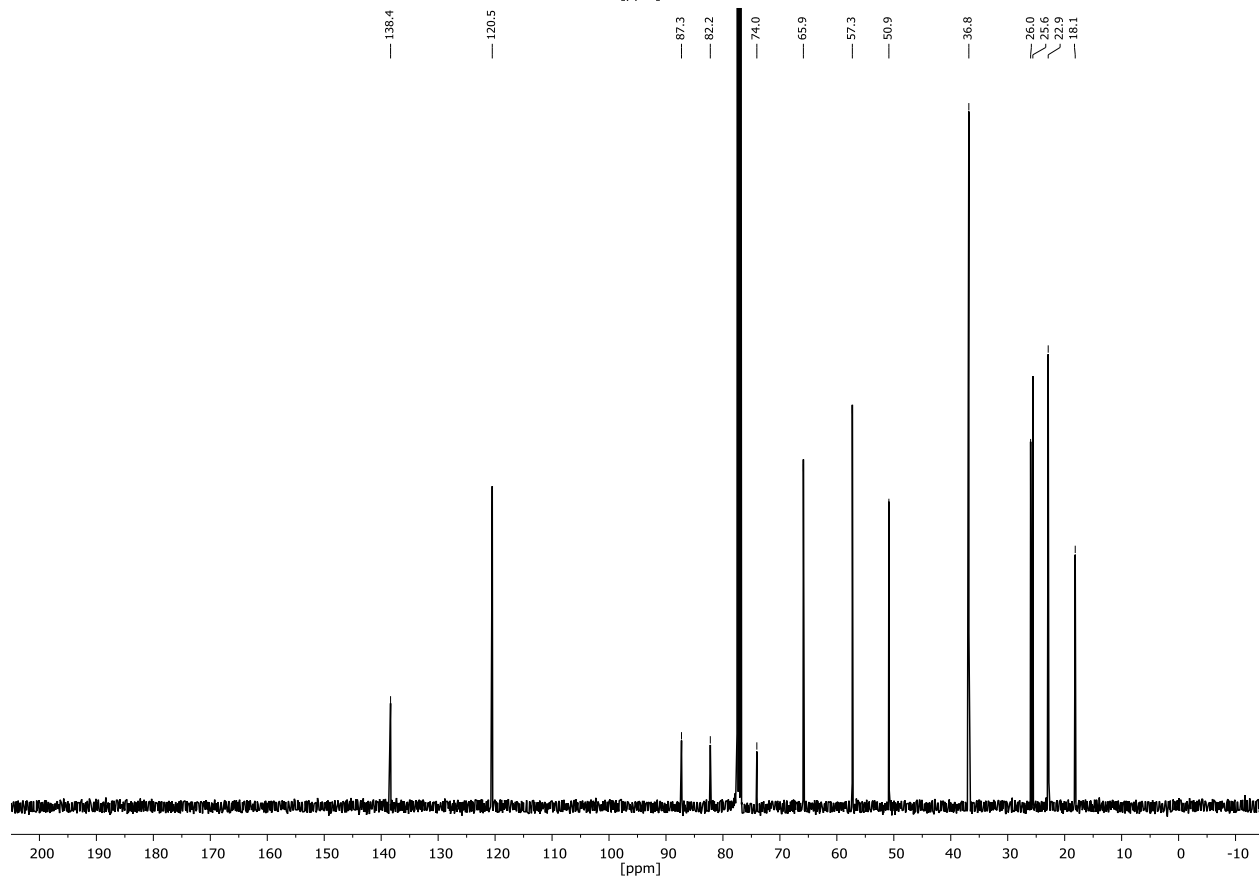

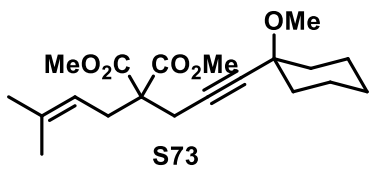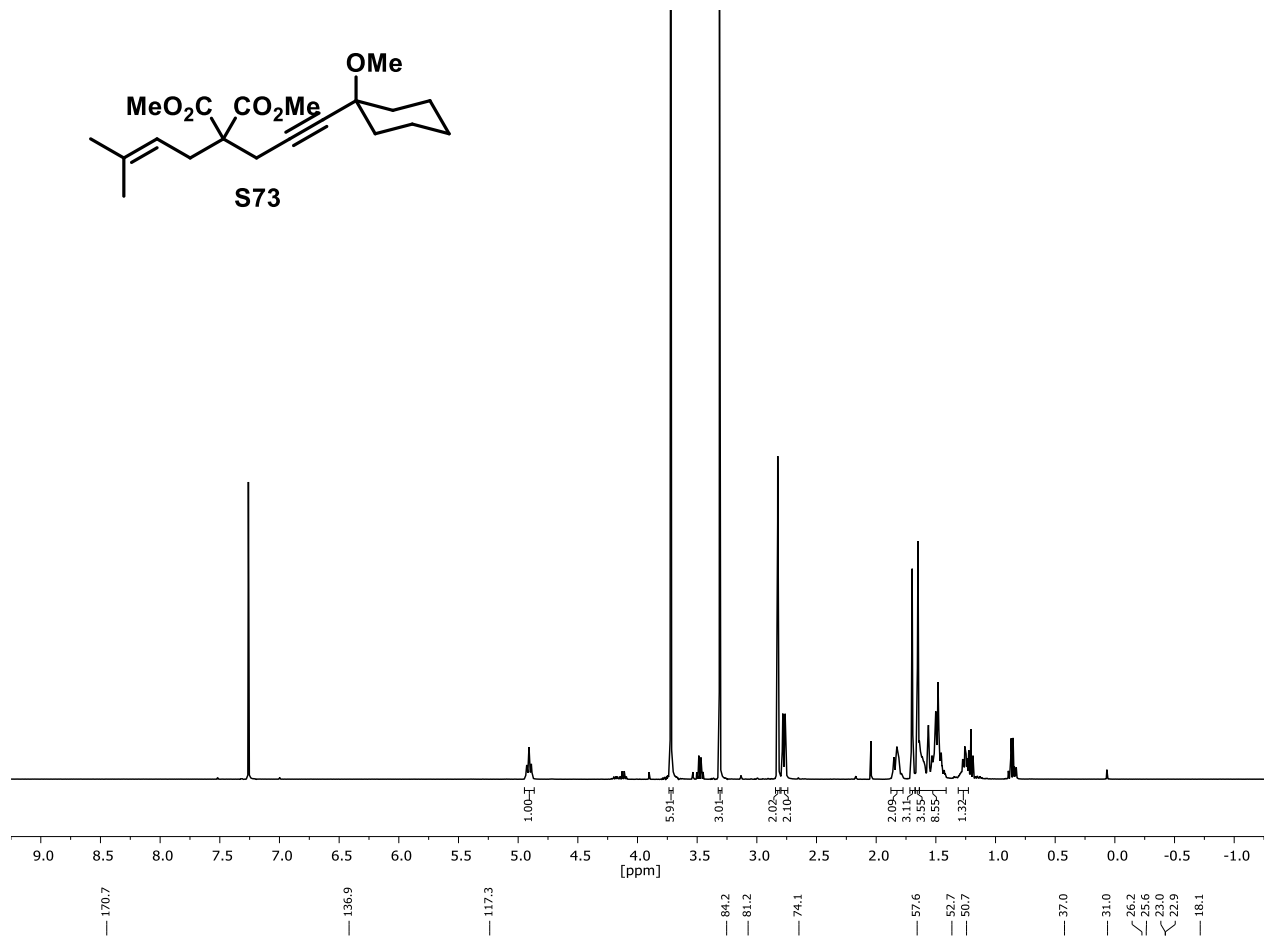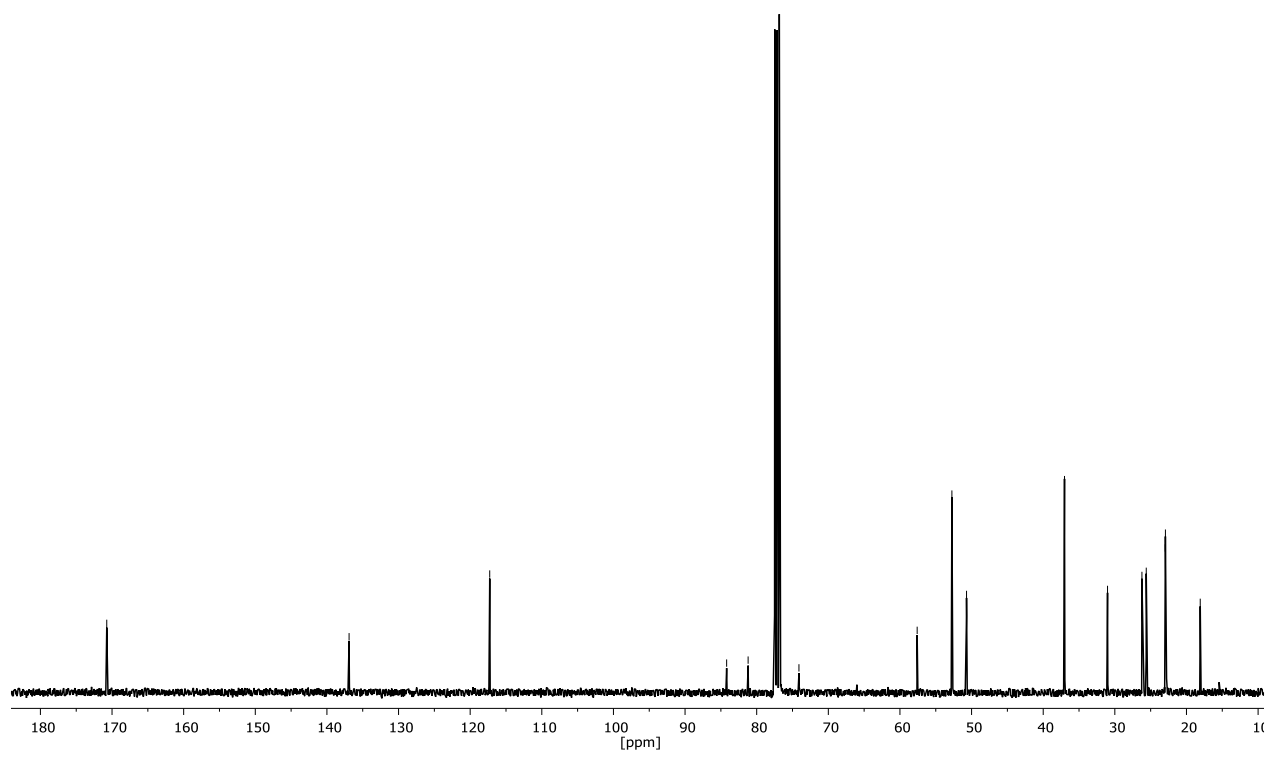

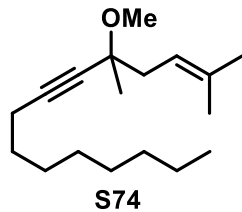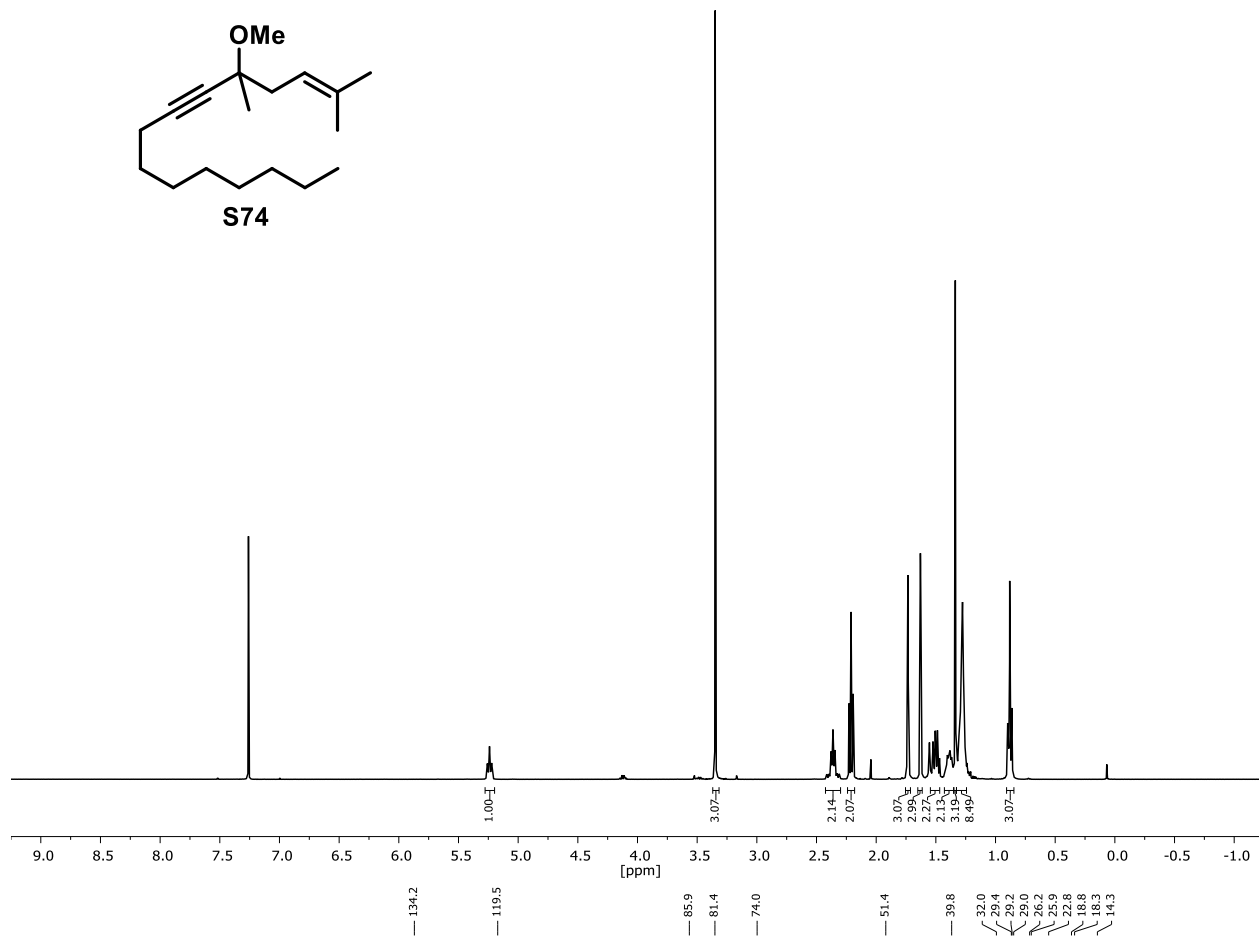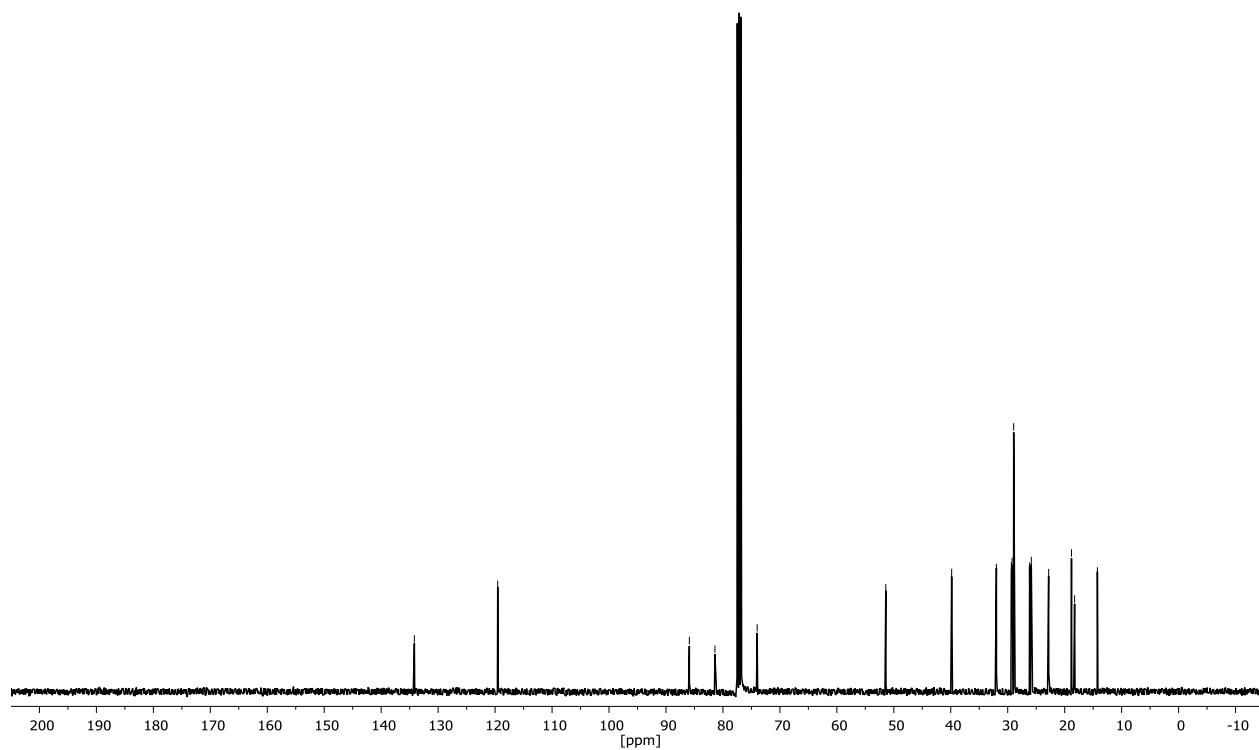

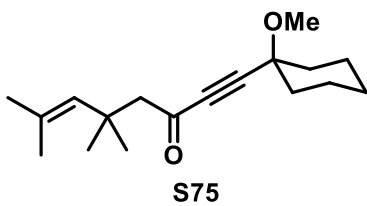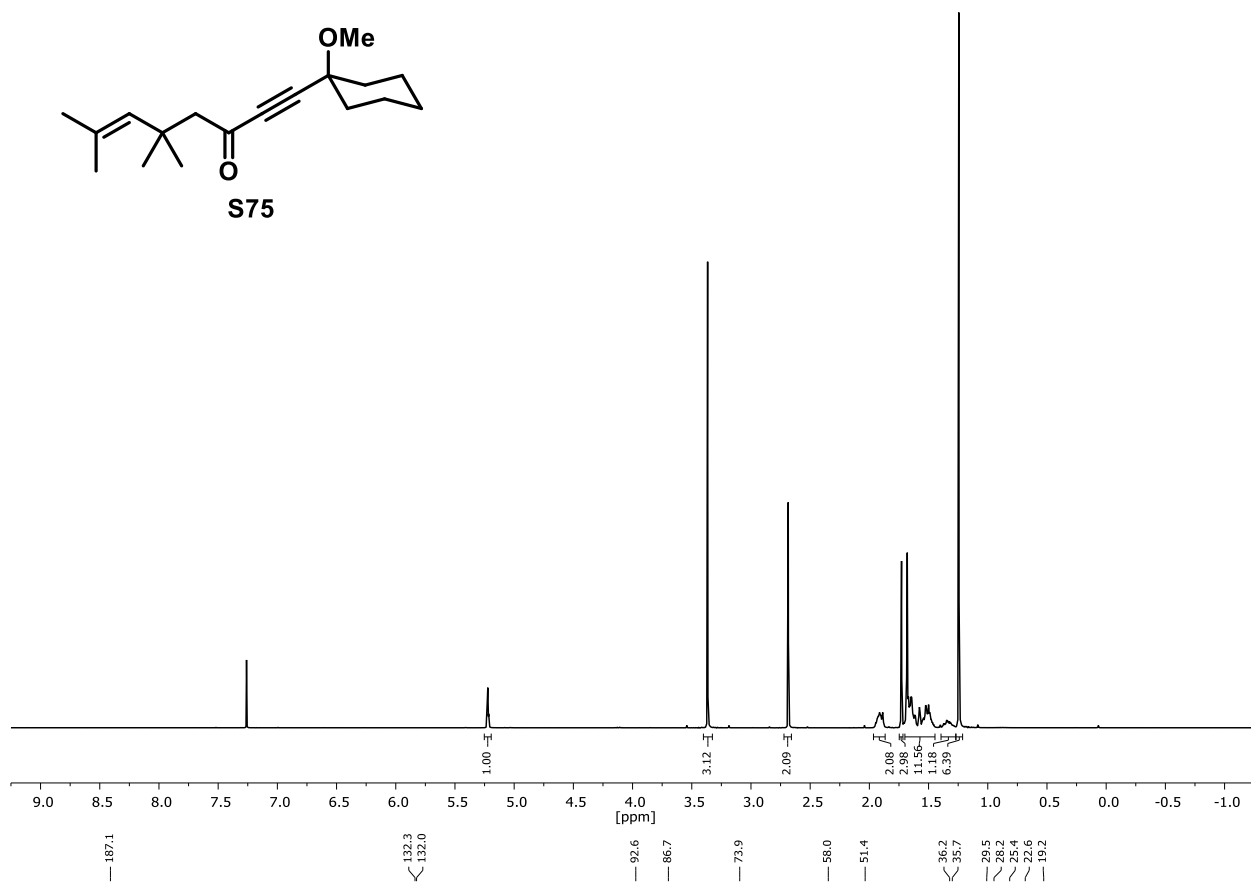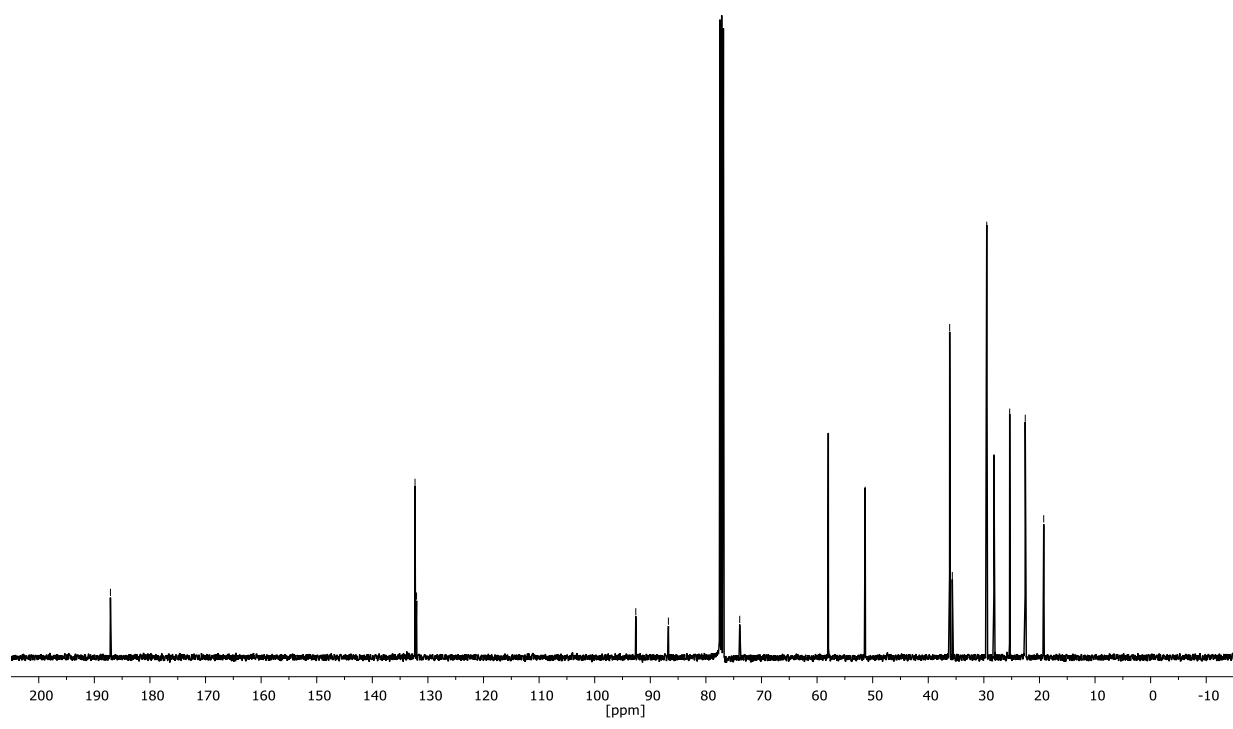



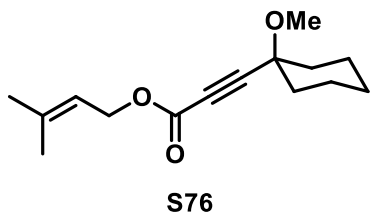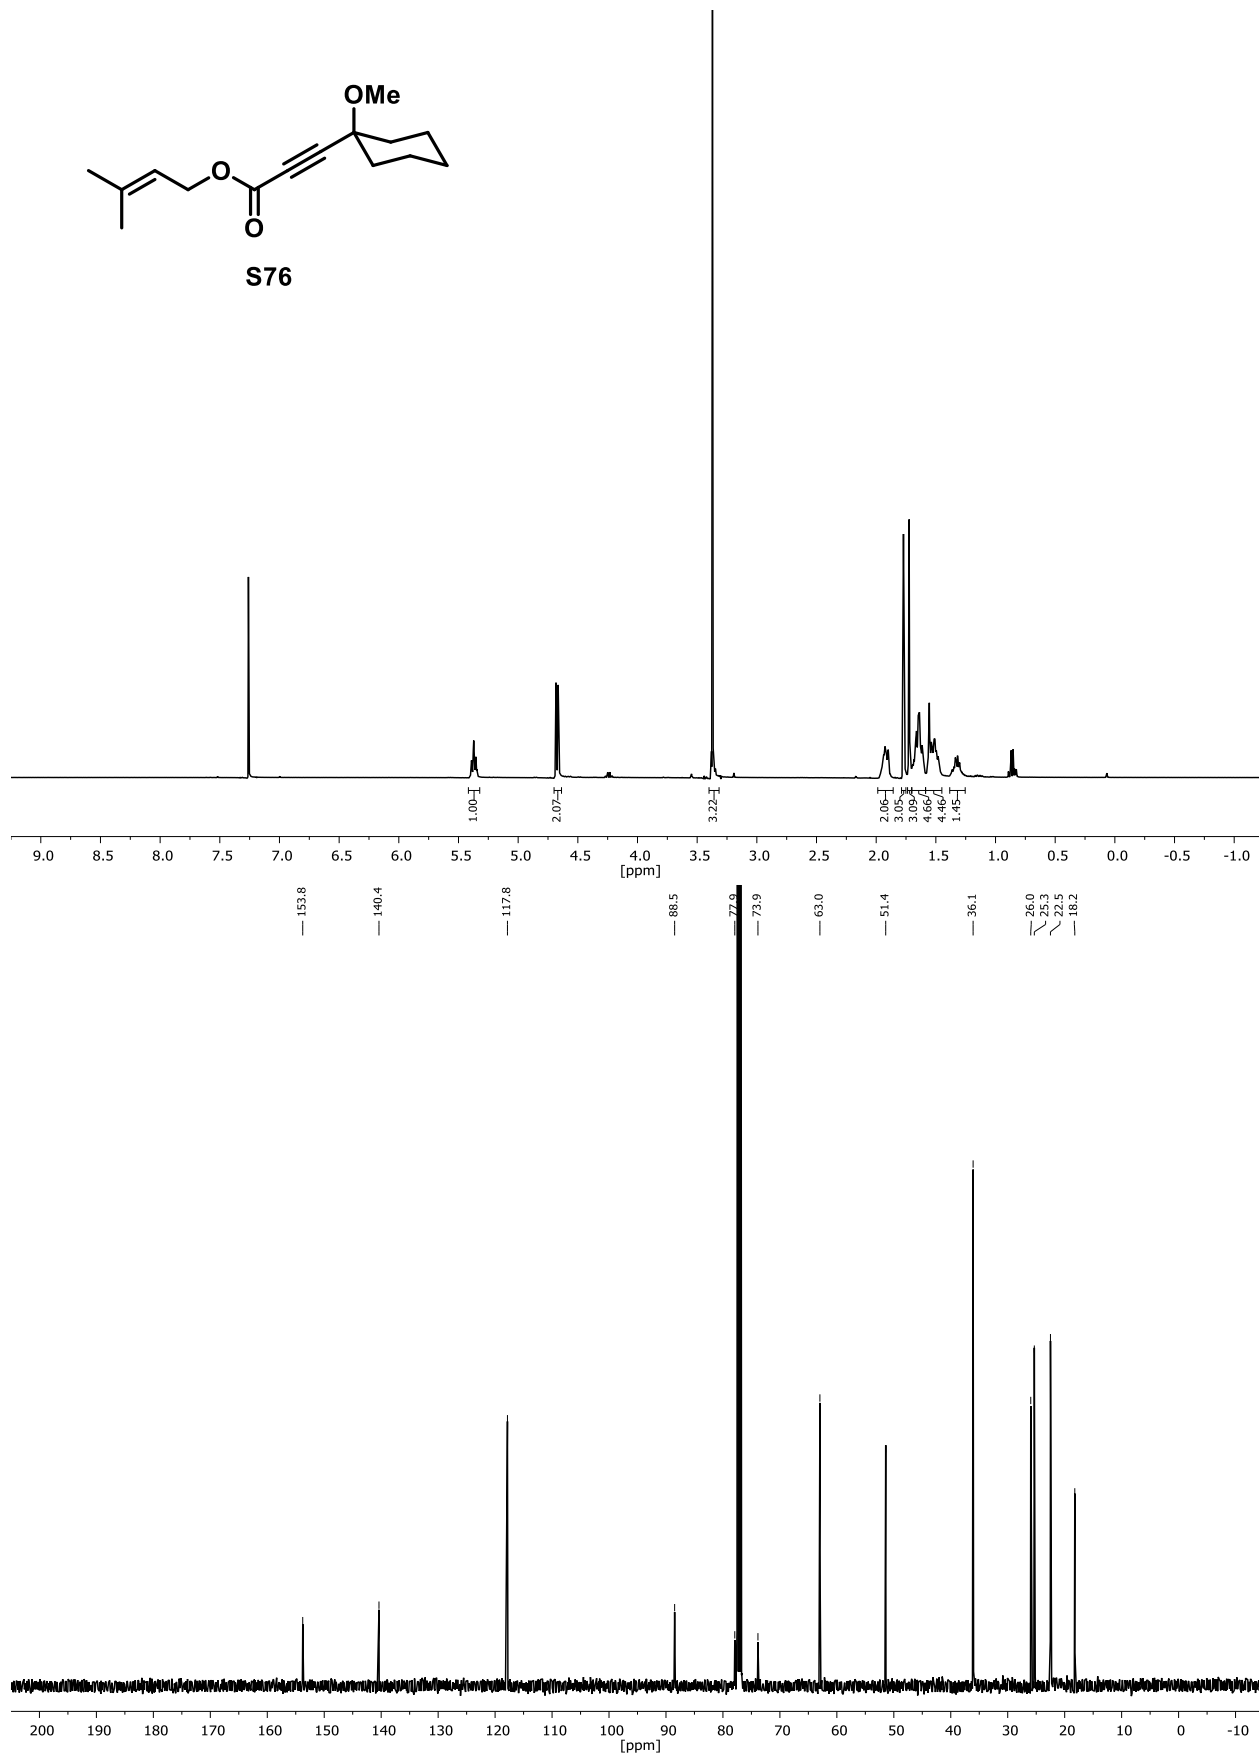

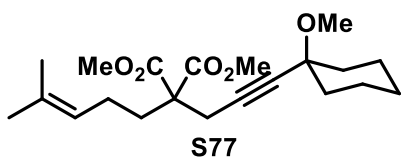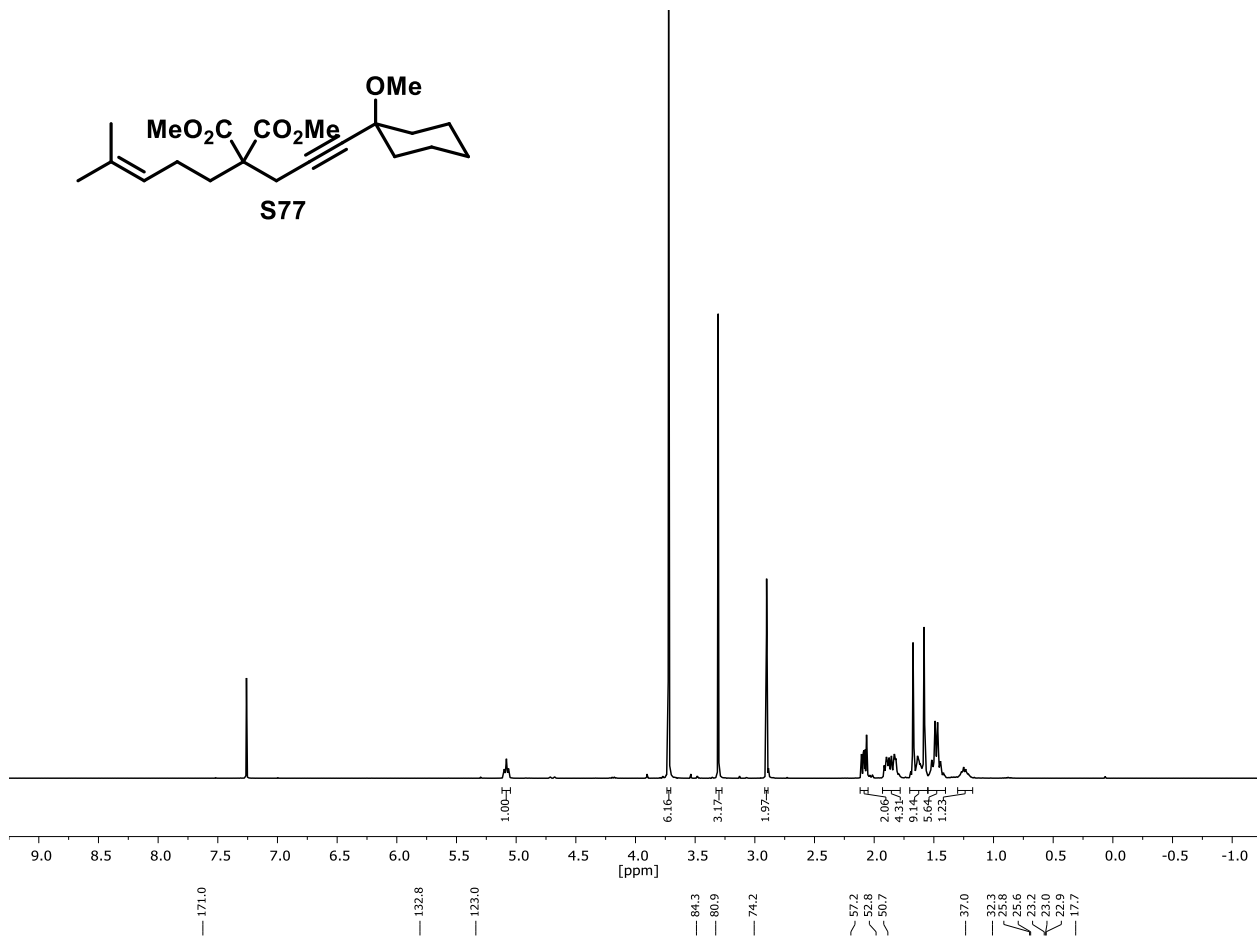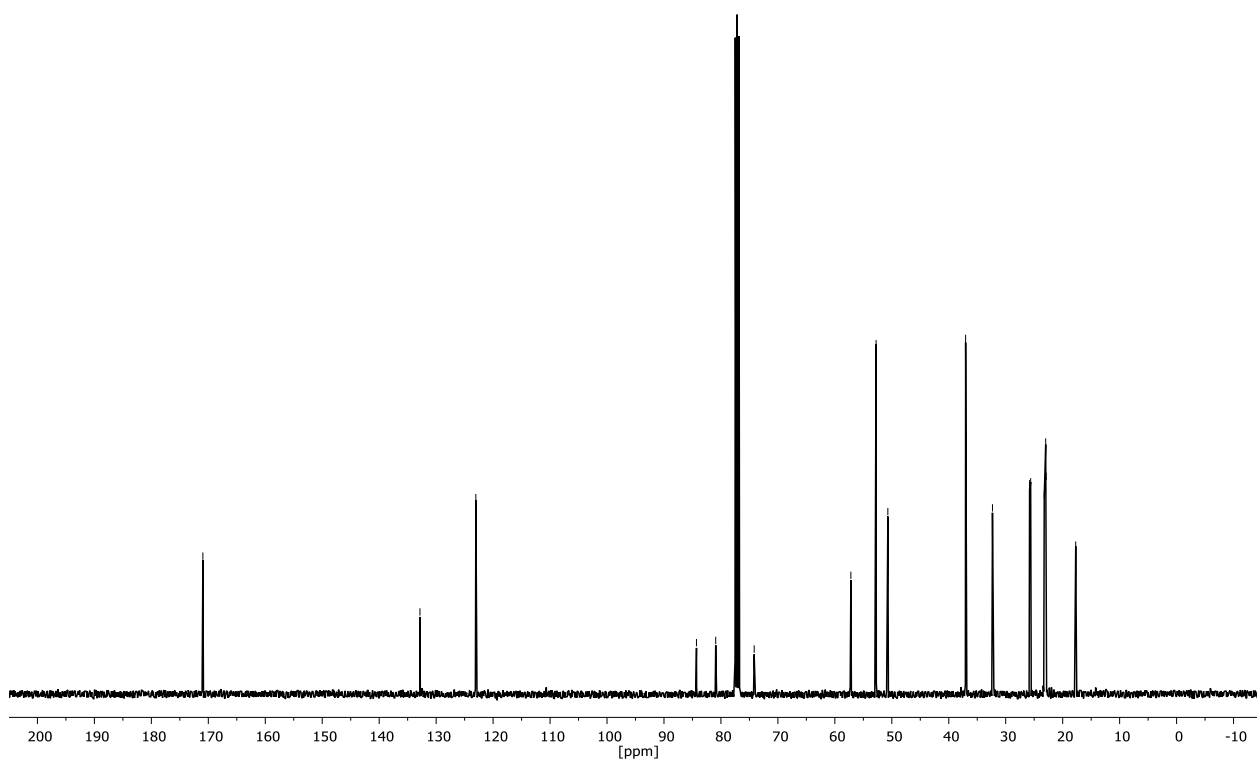

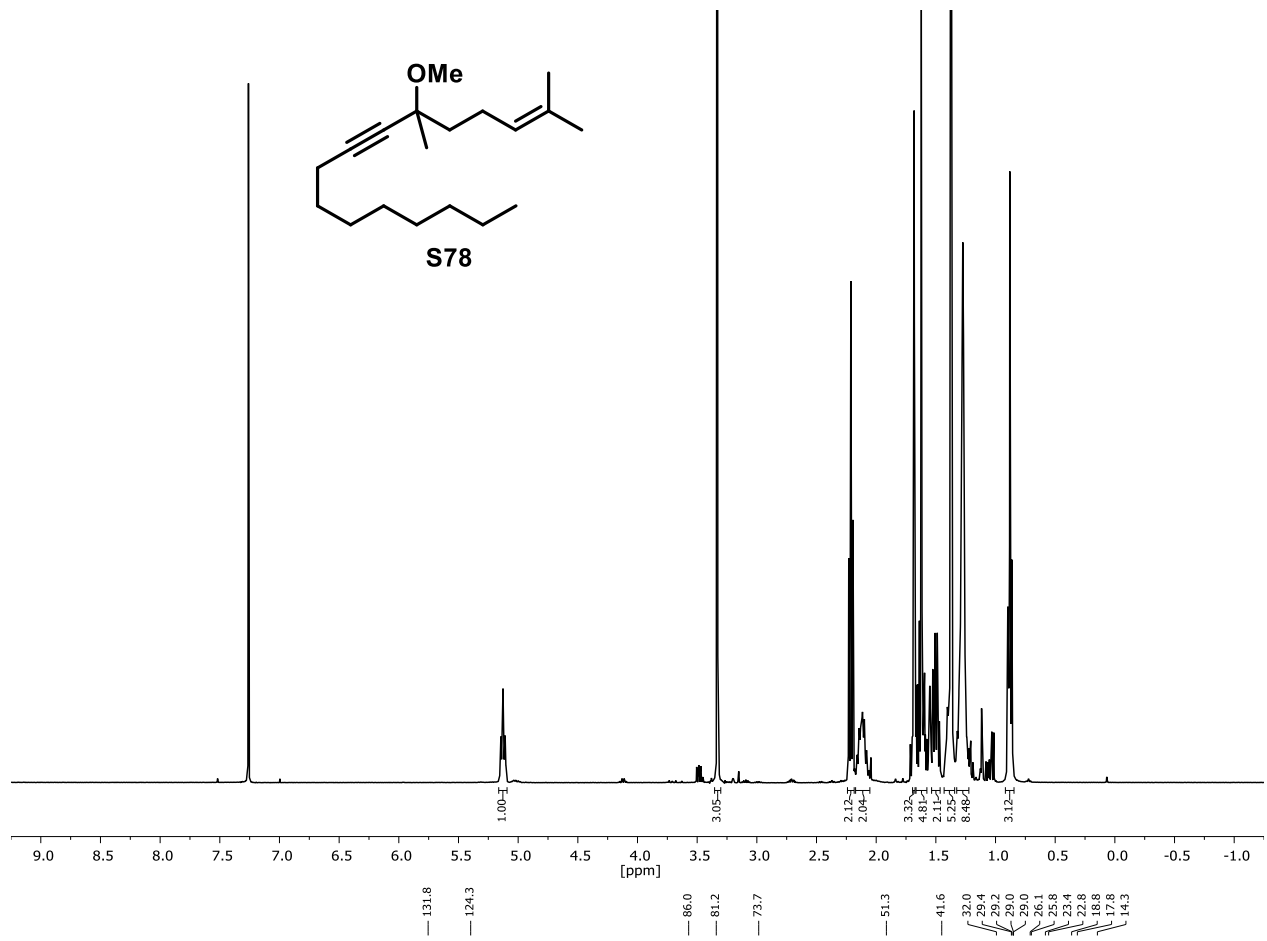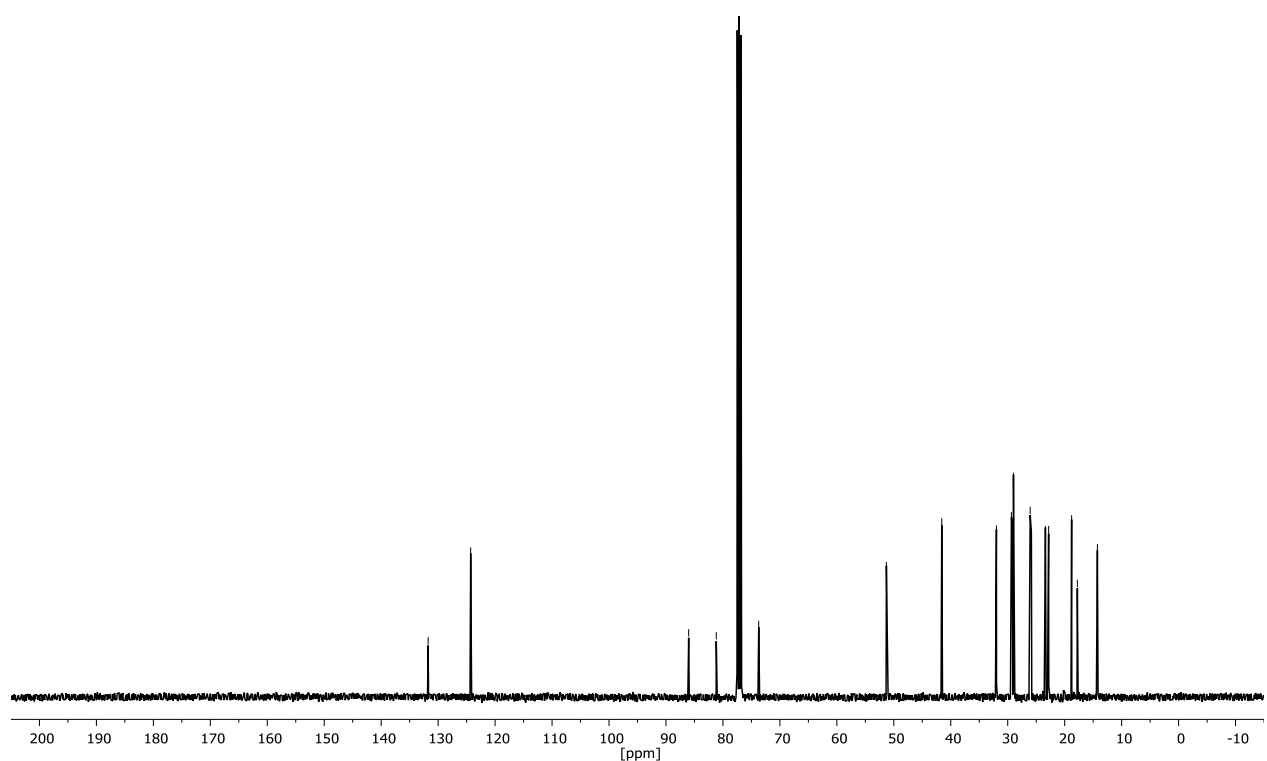

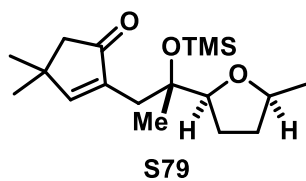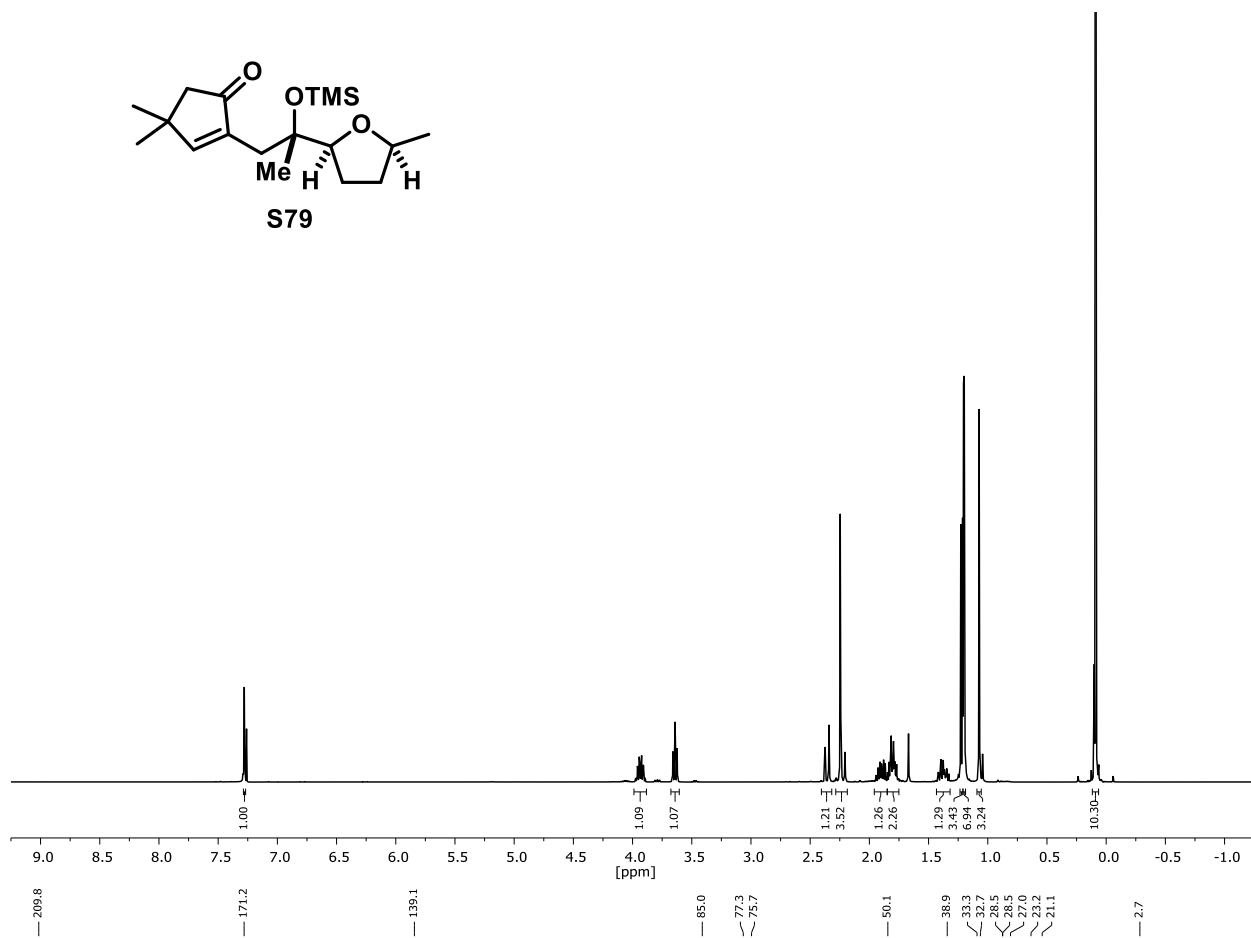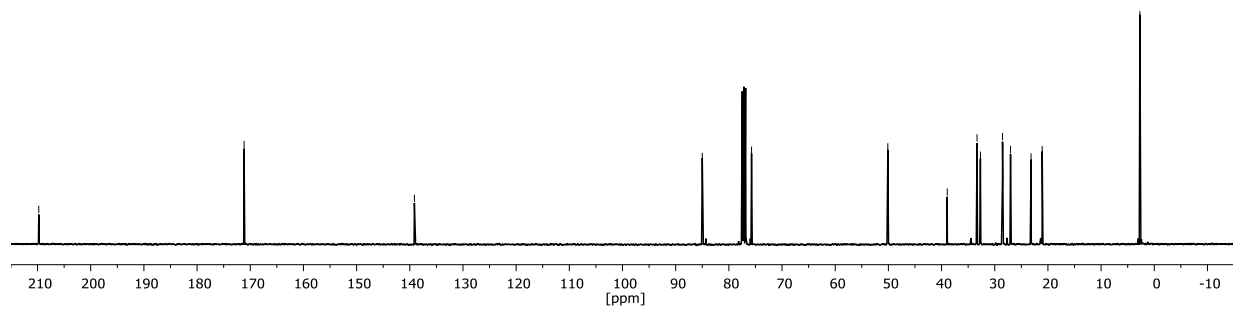

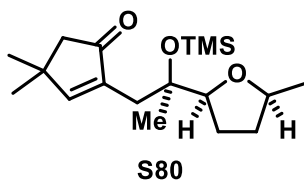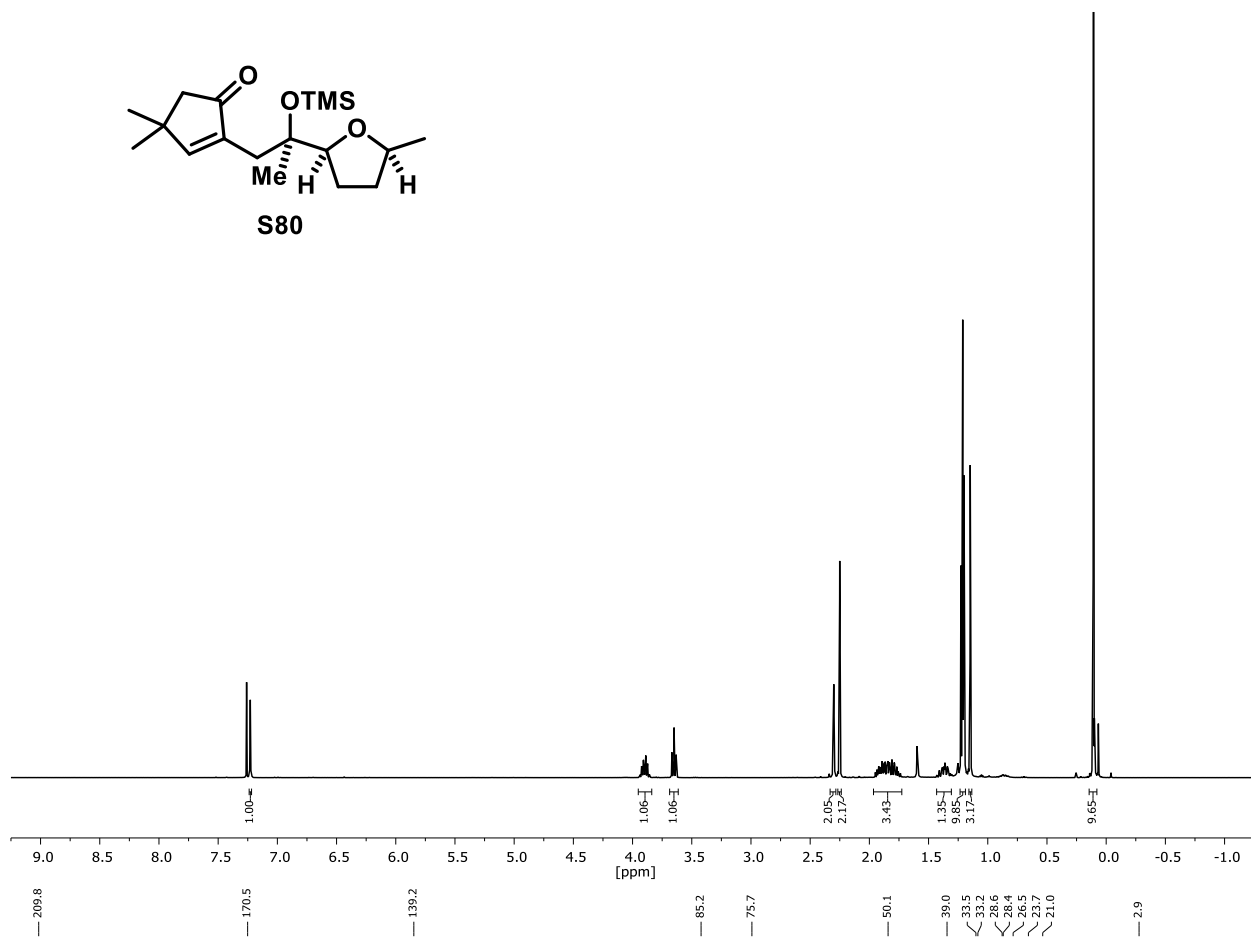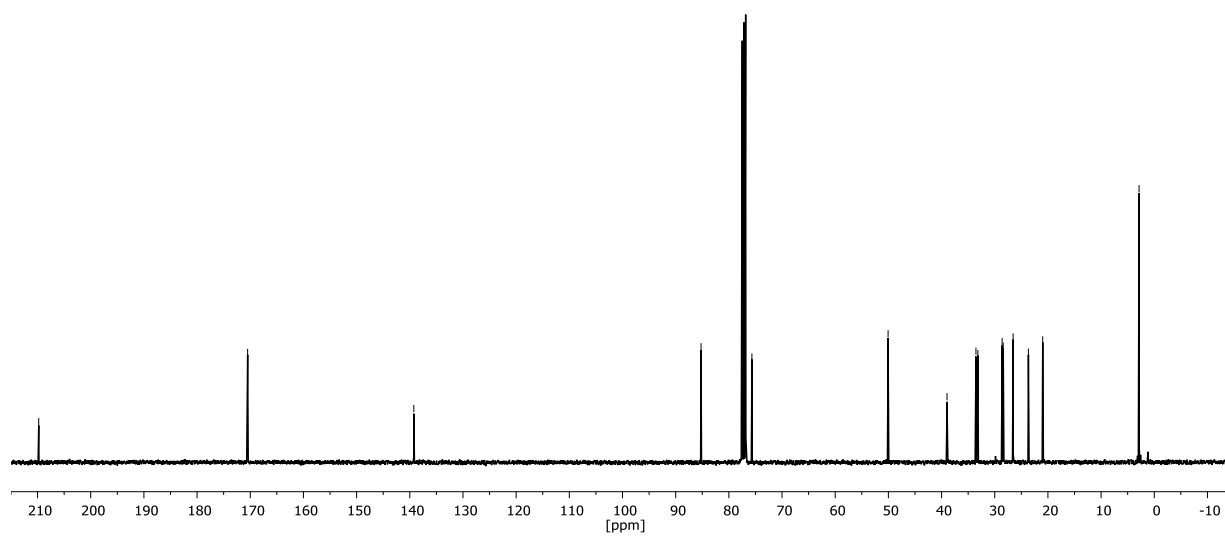

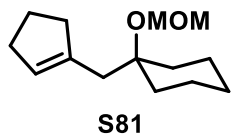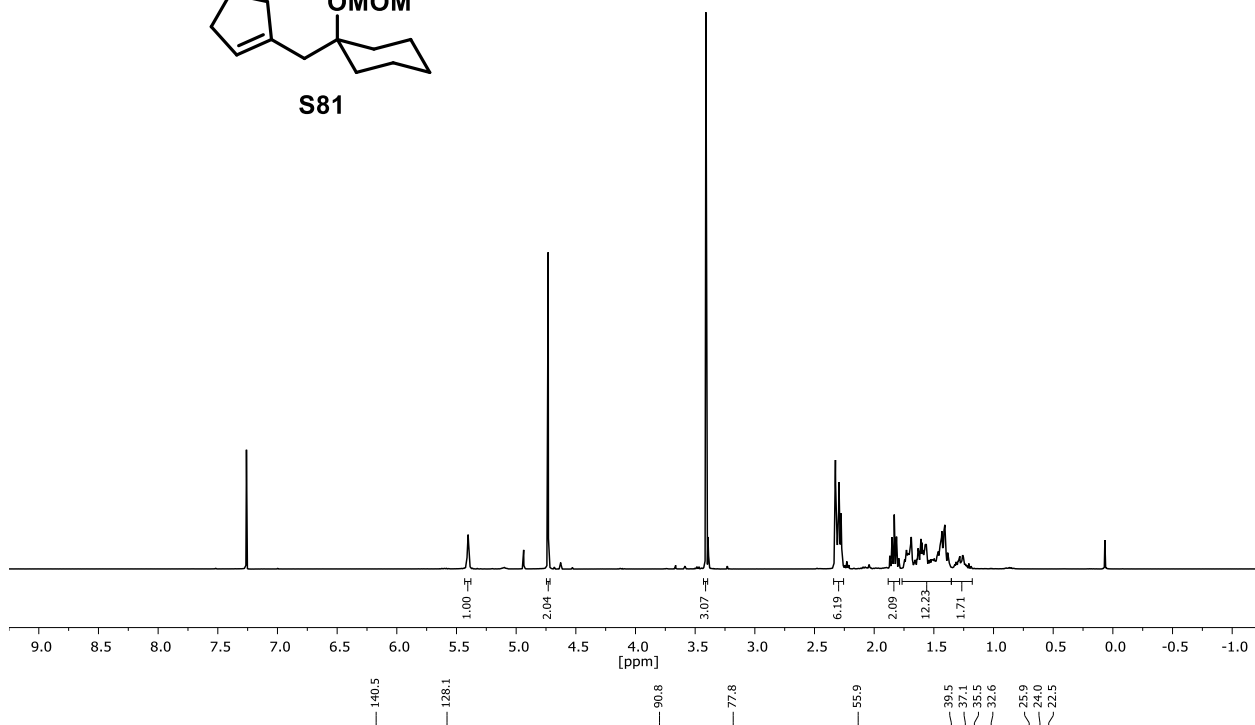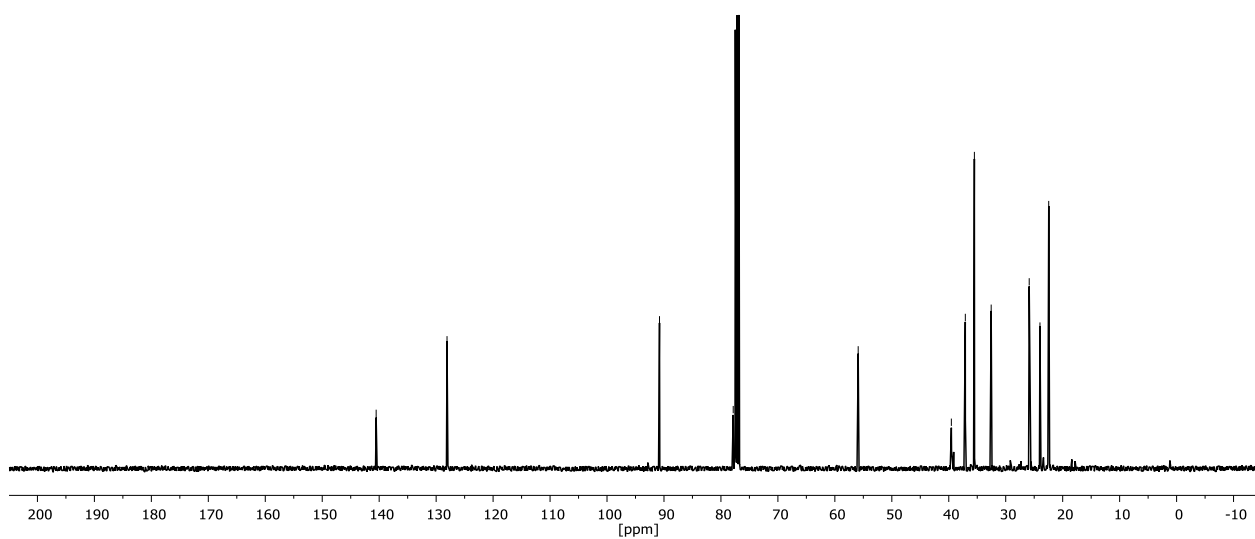

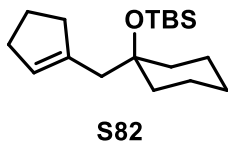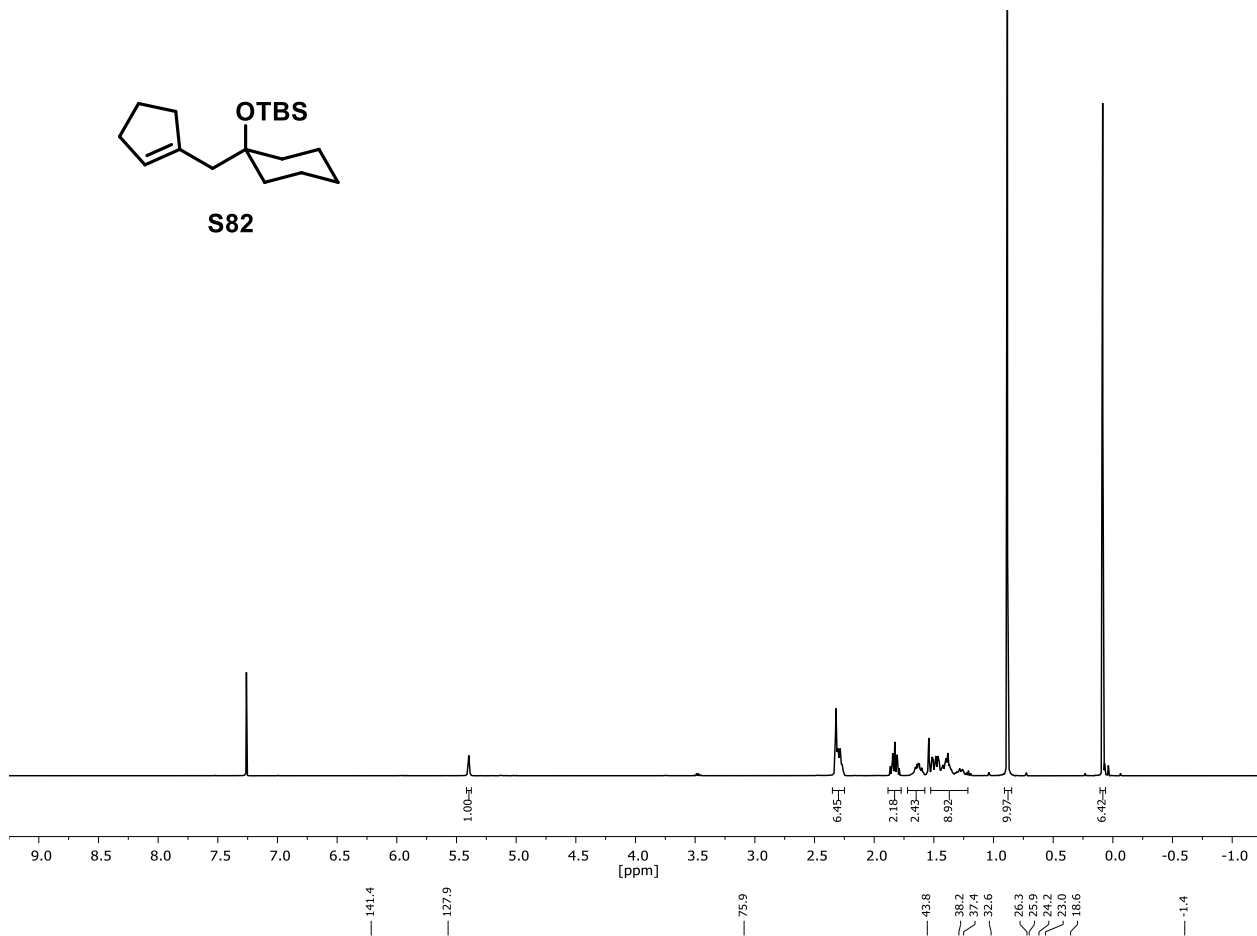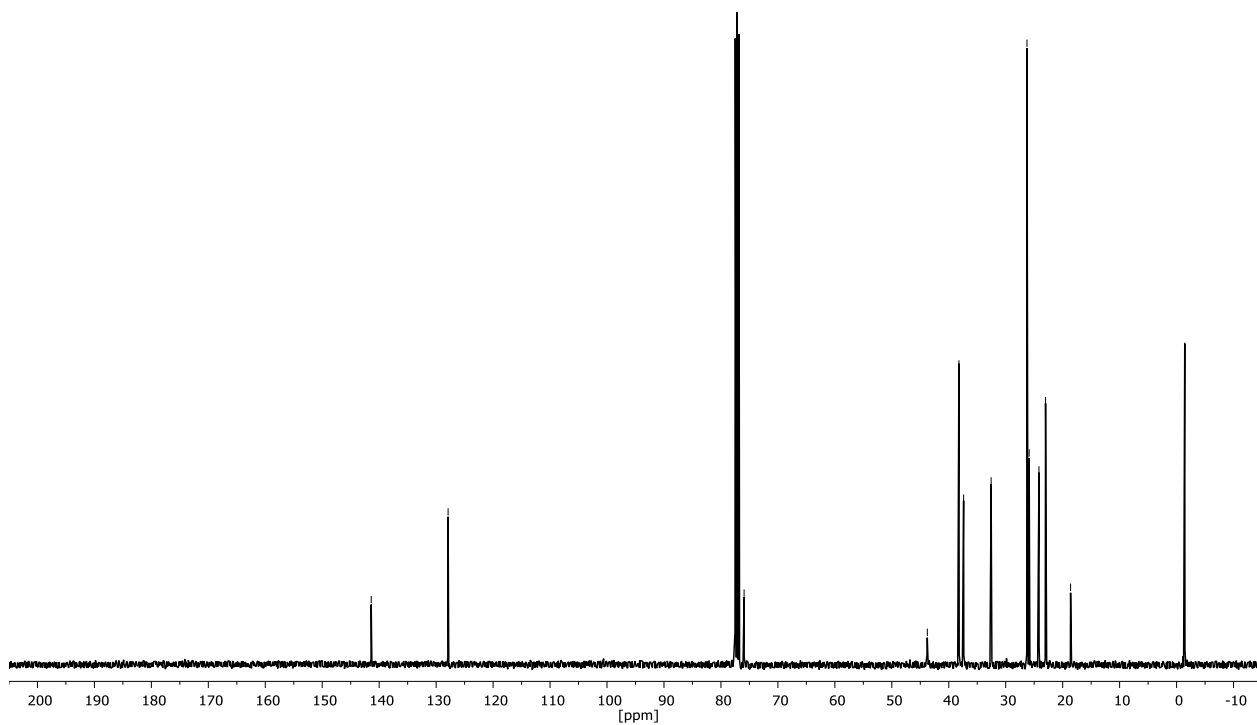

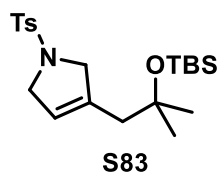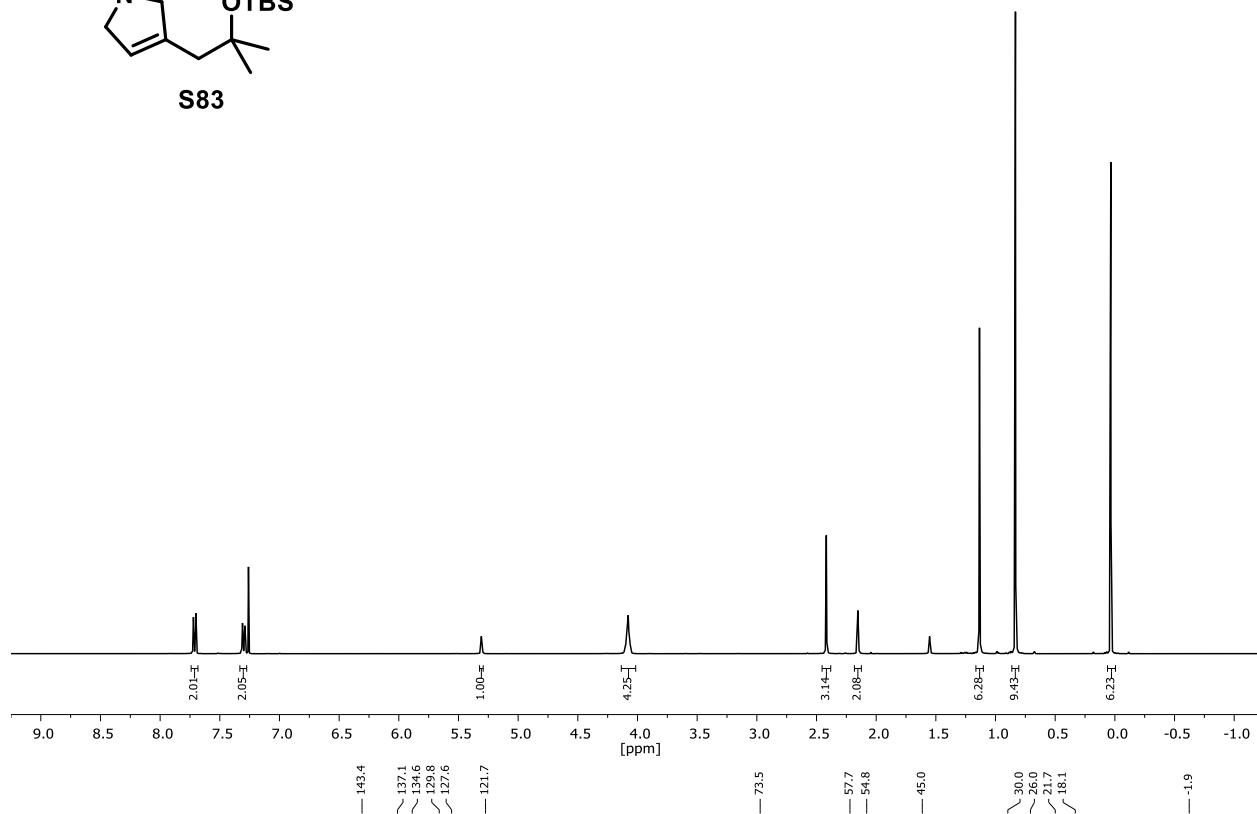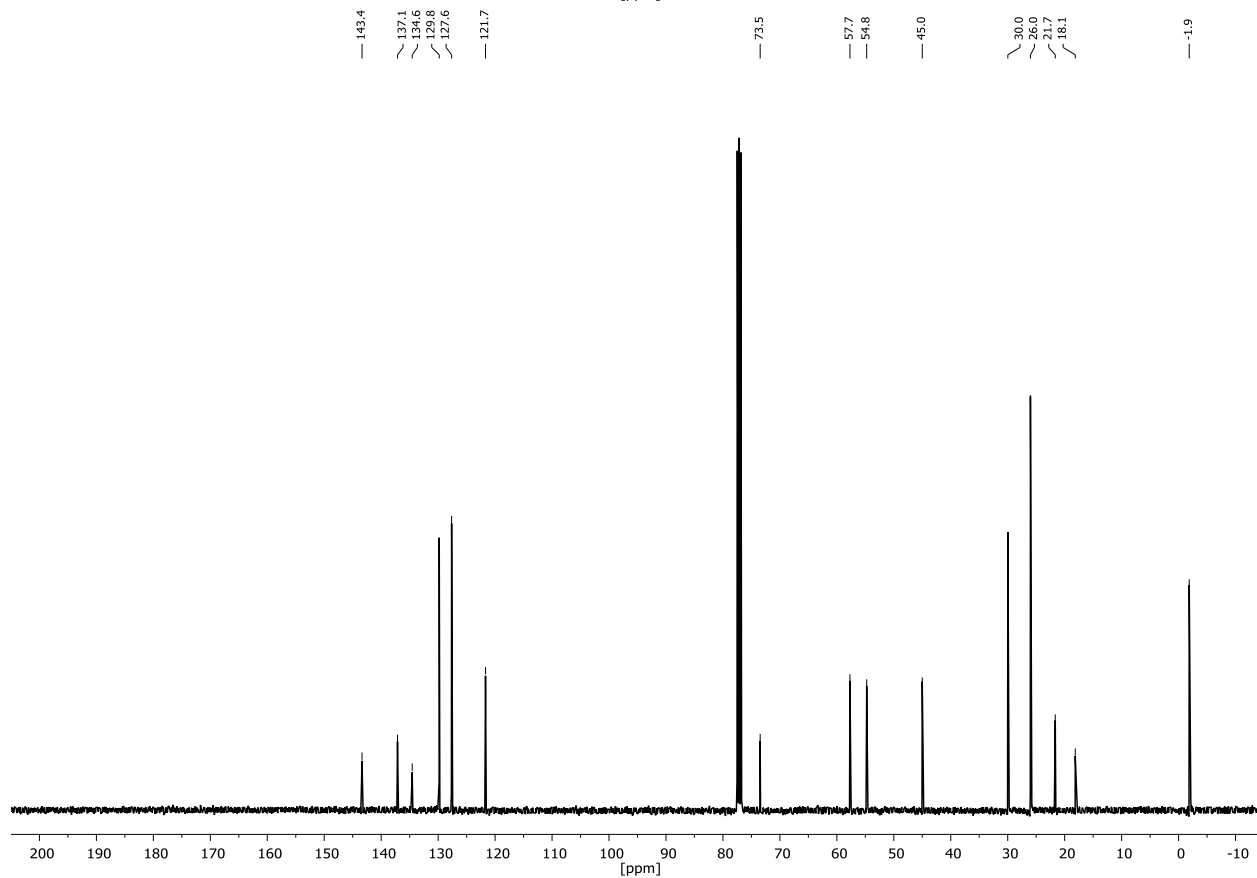



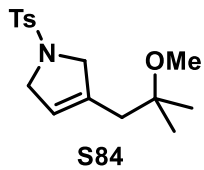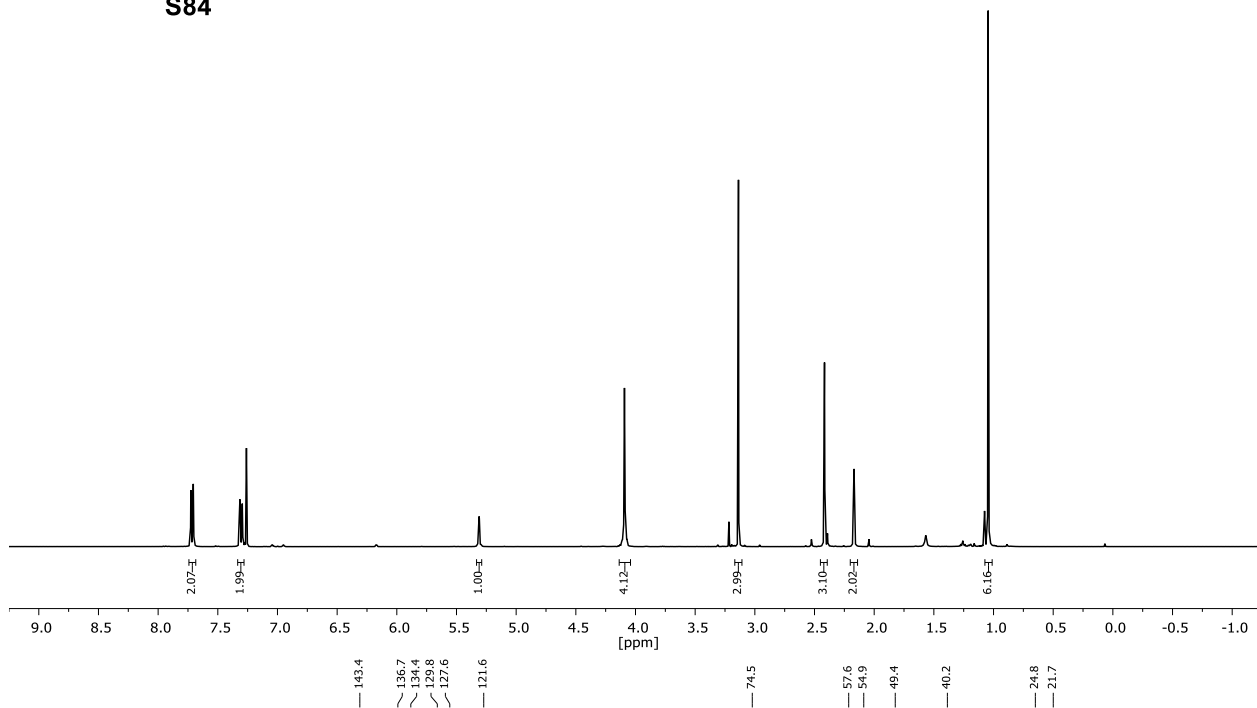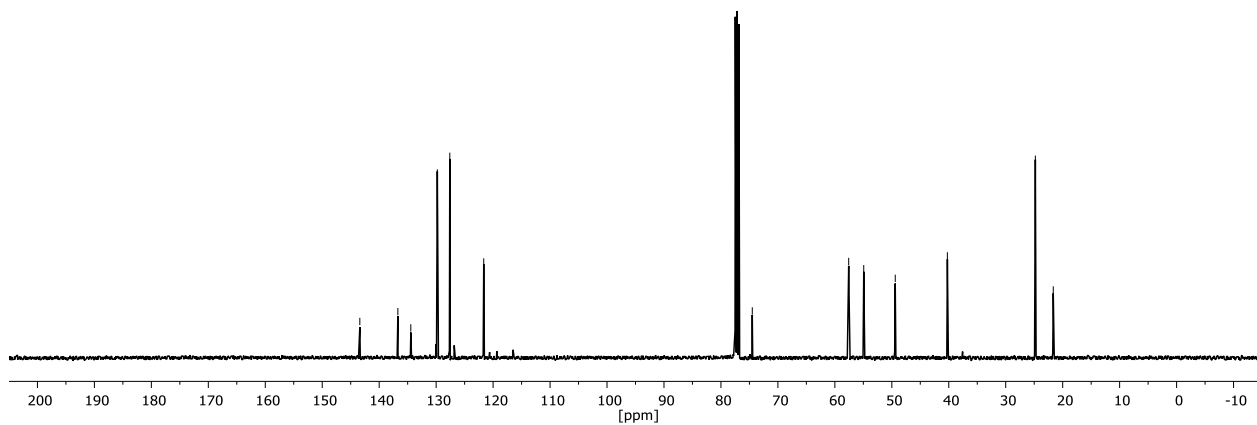

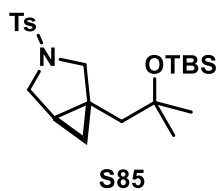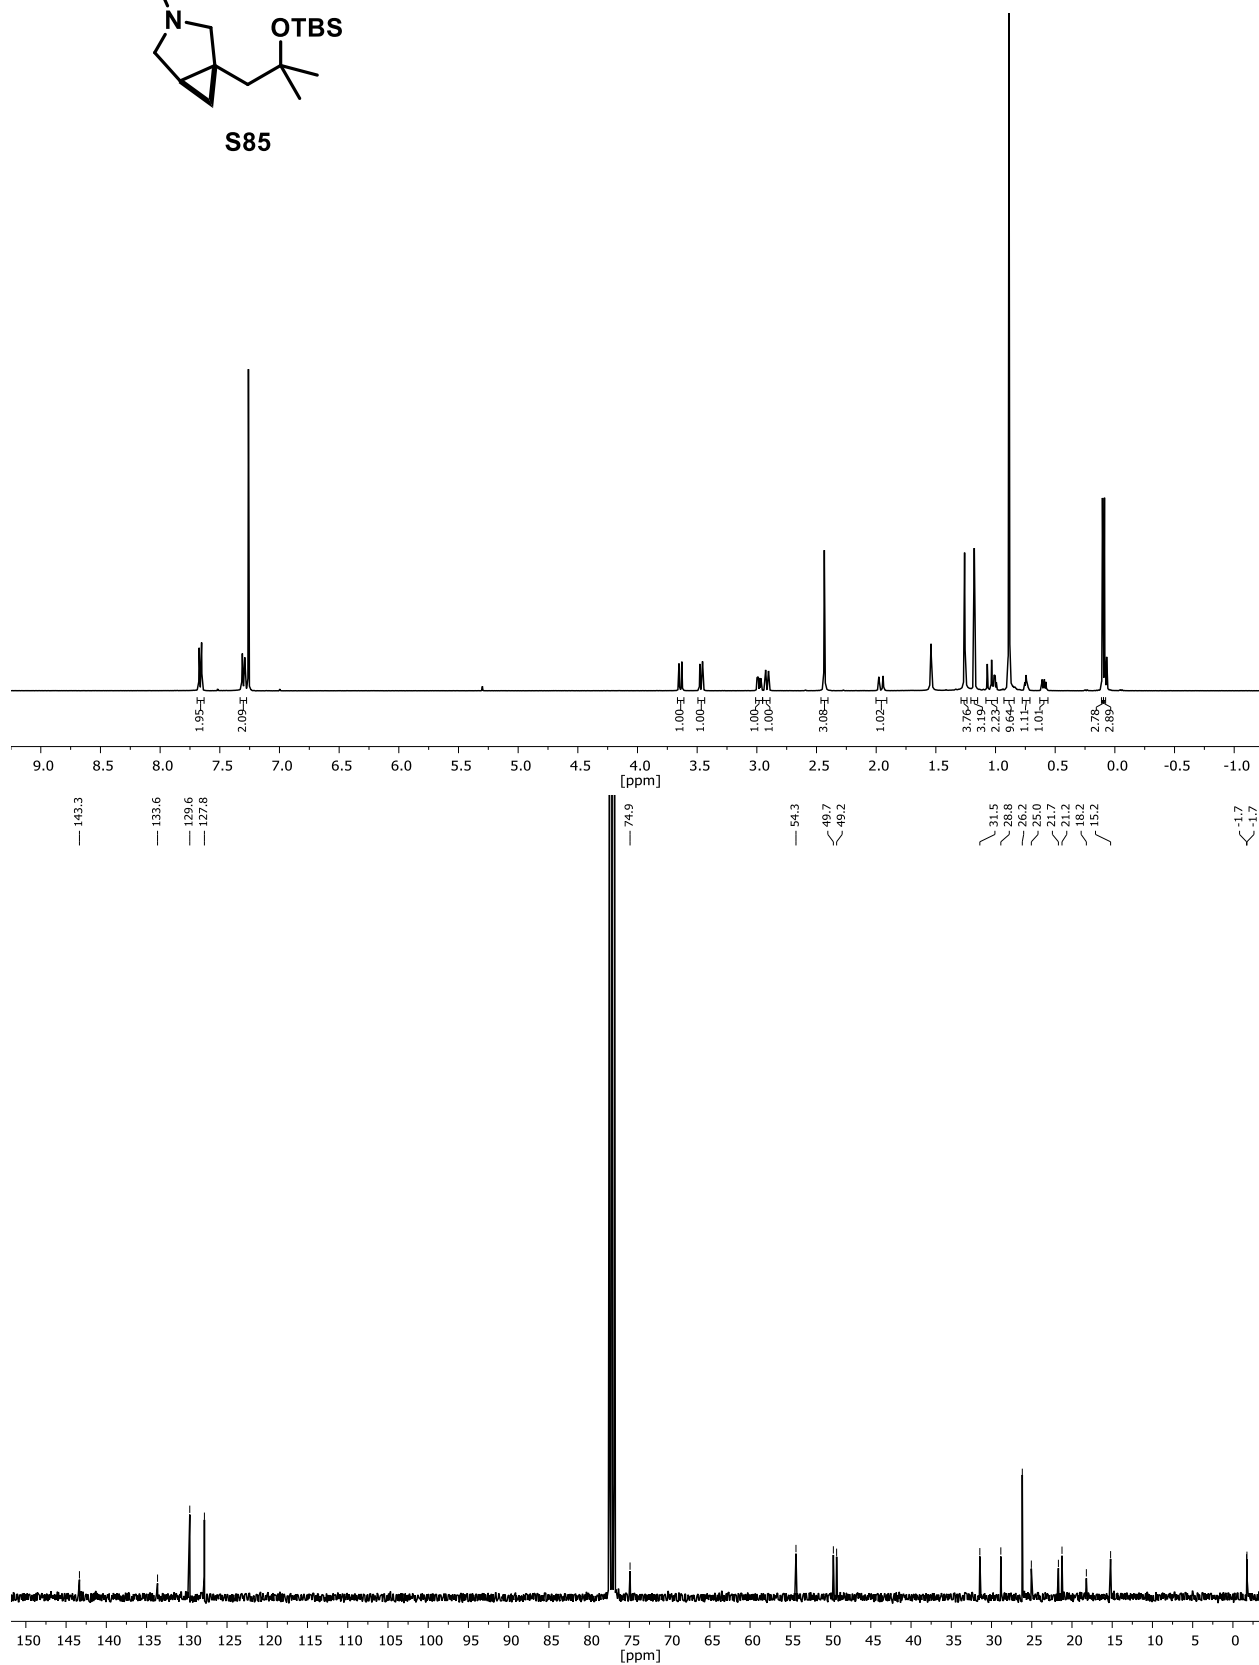

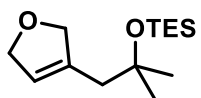

S86

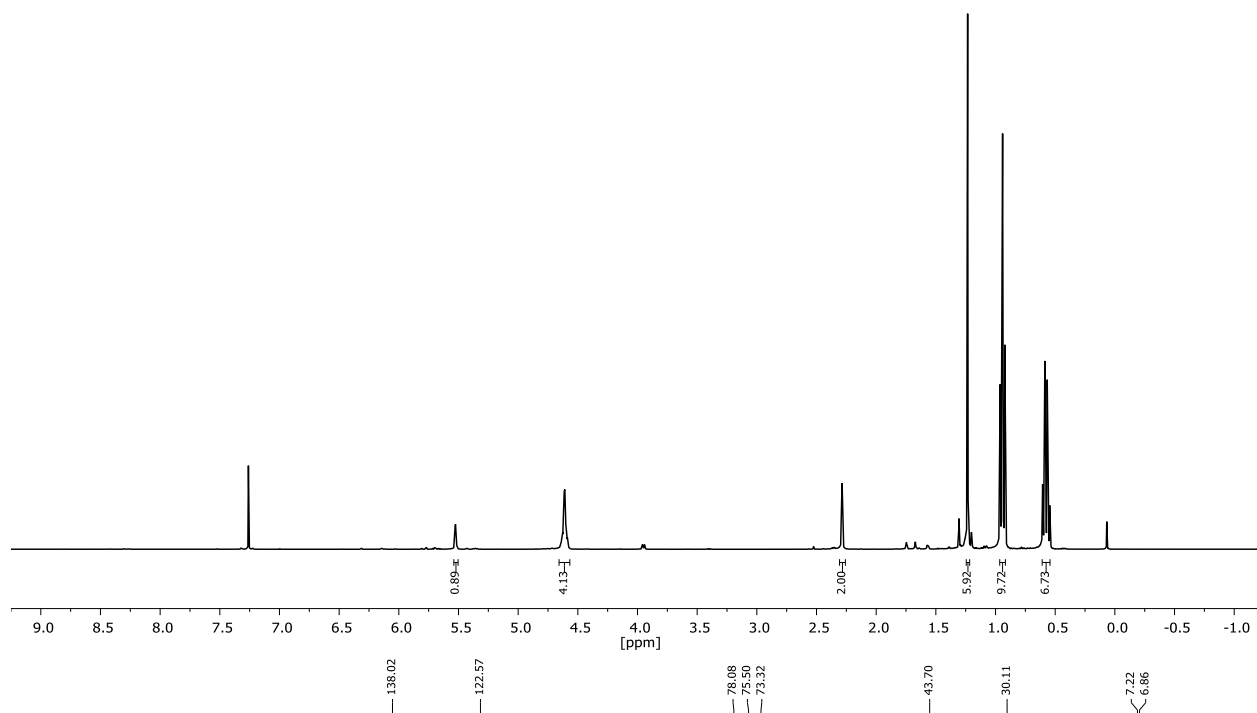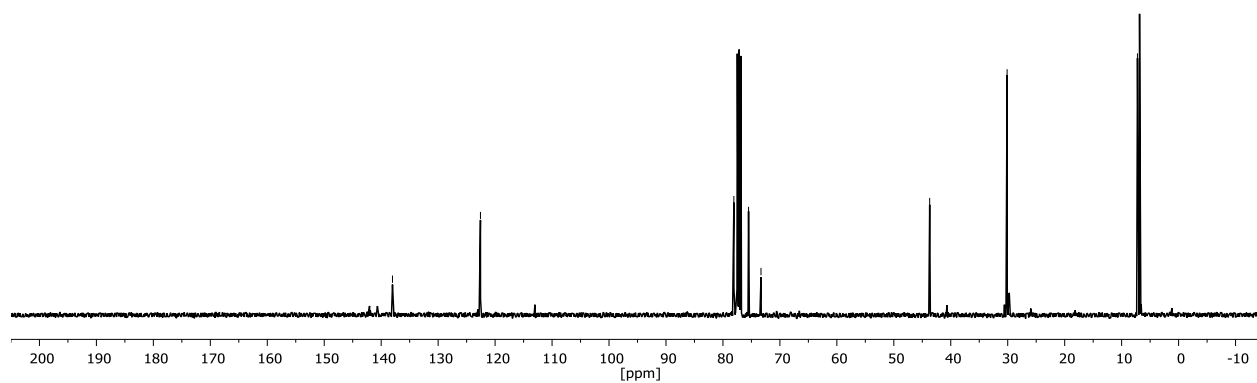

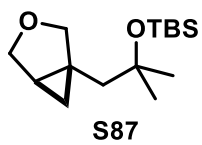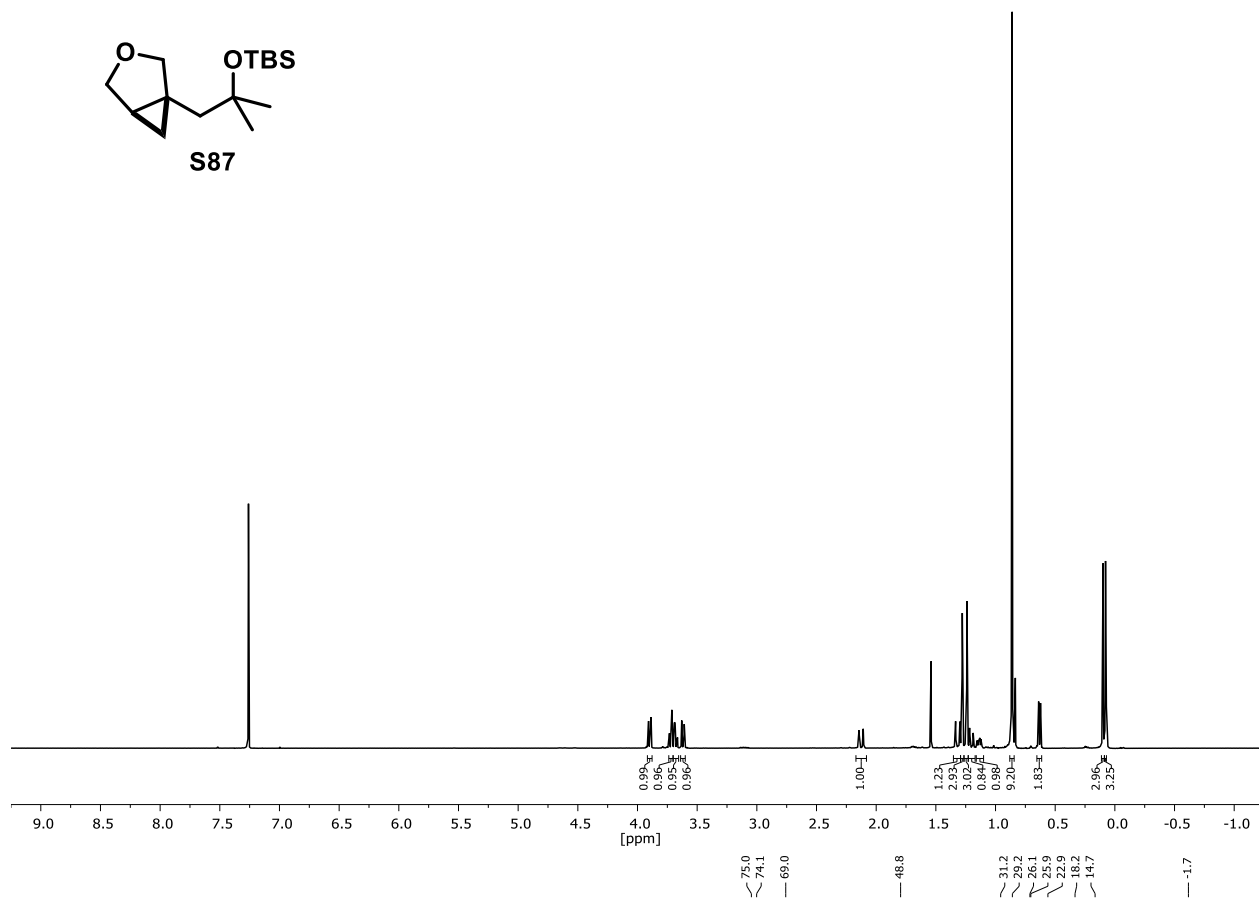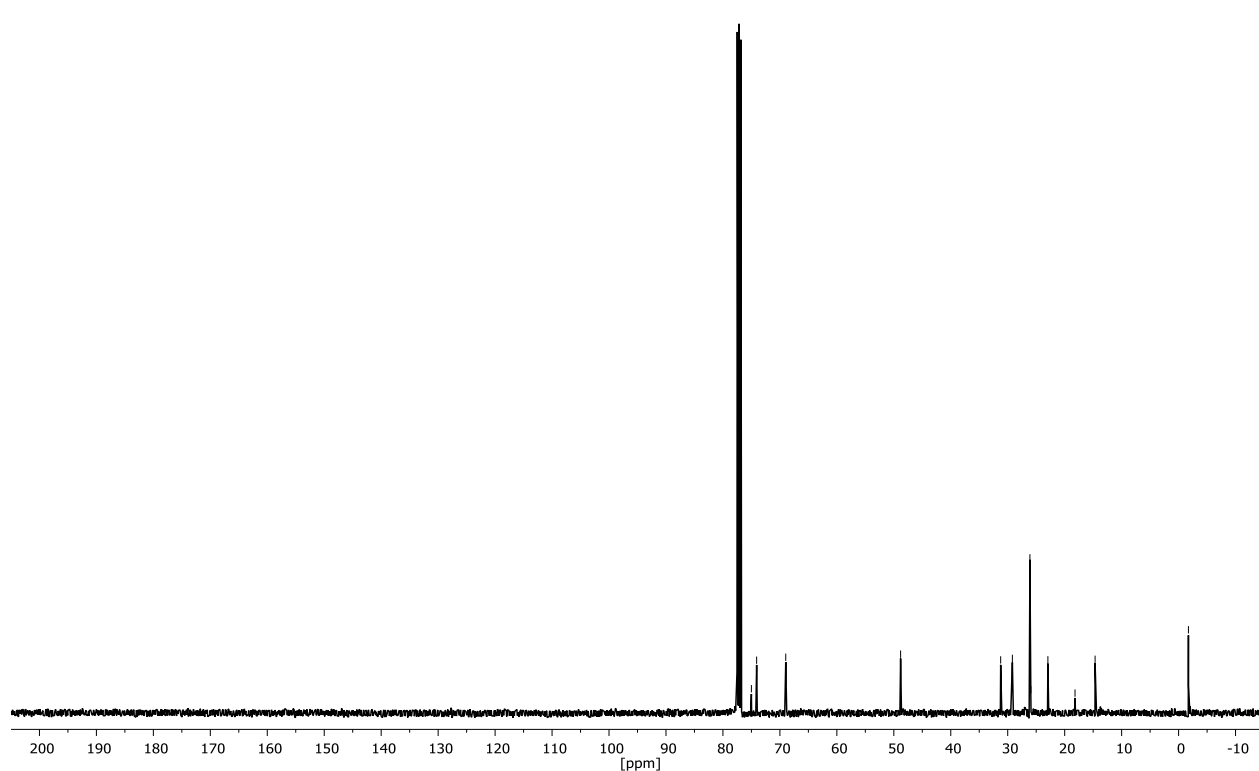

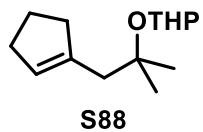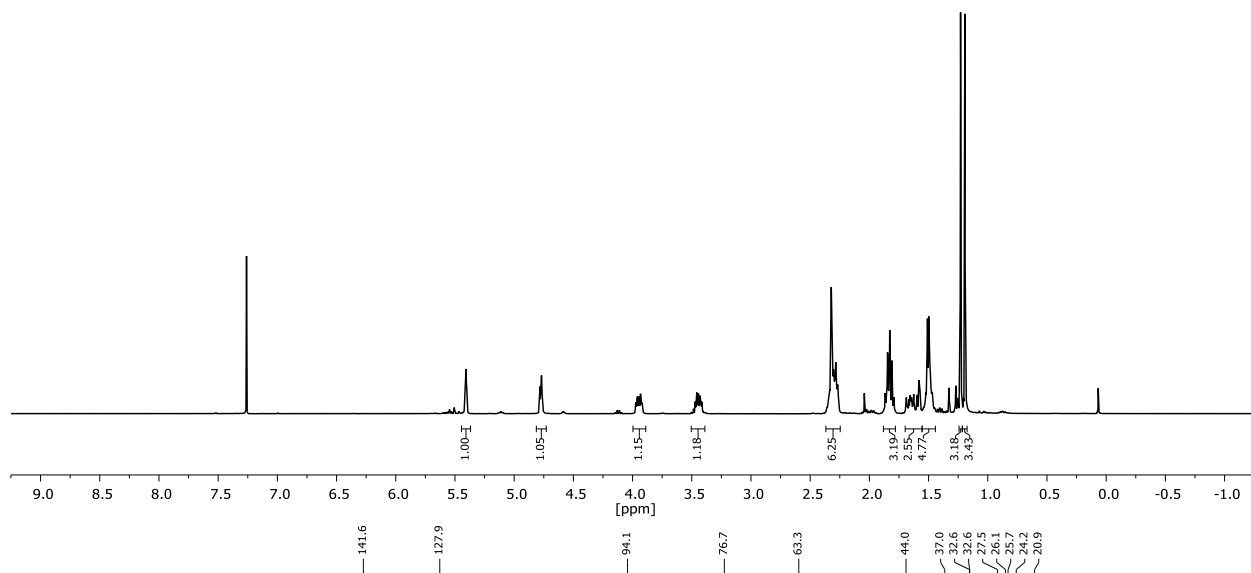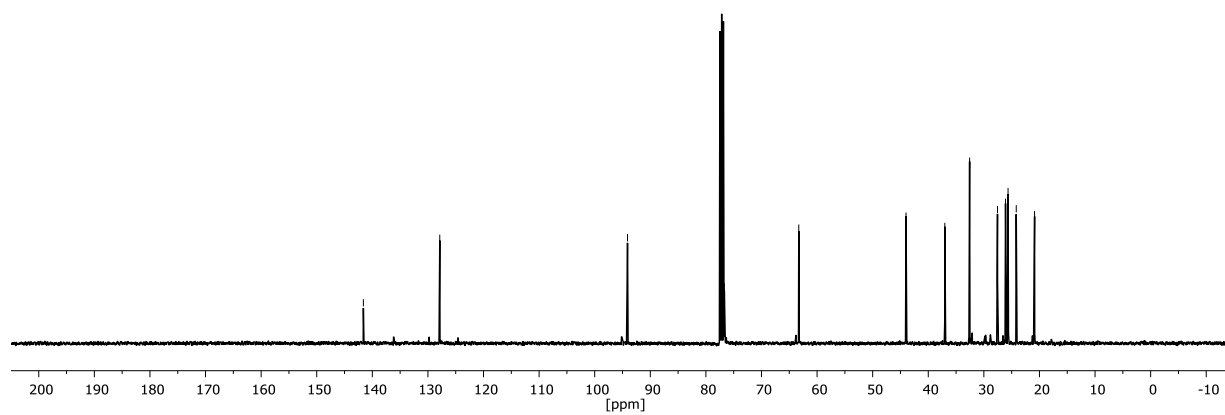

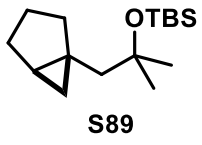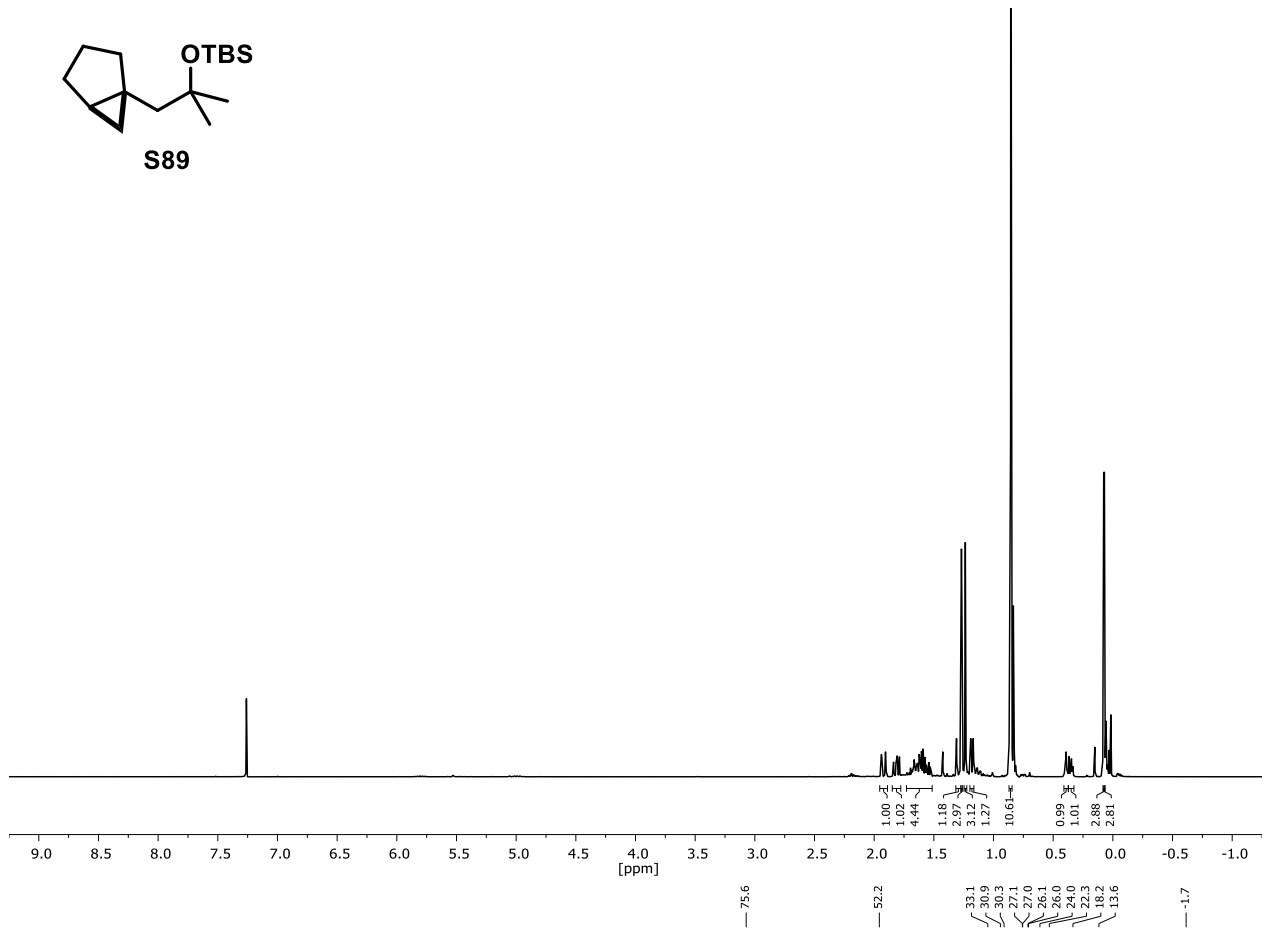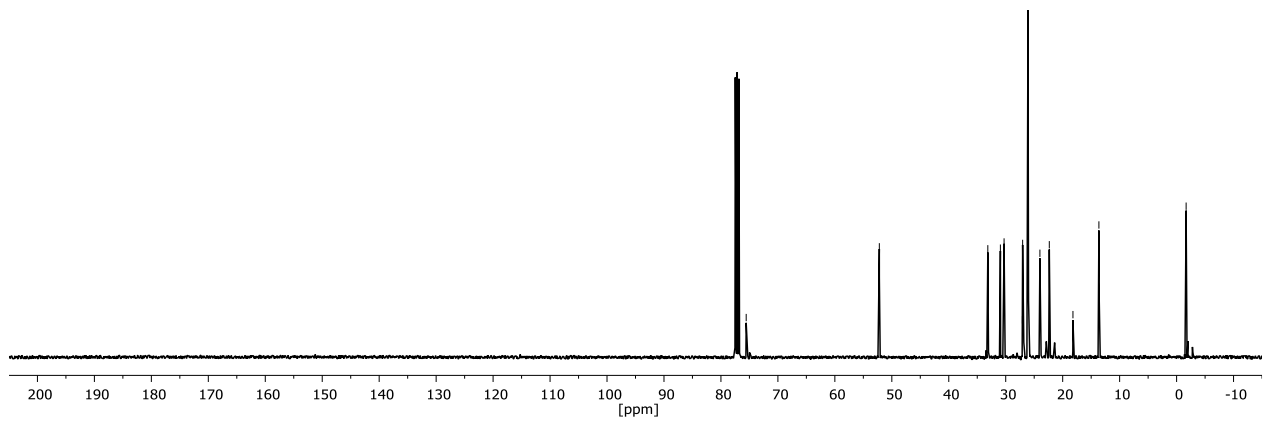

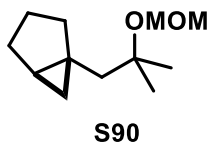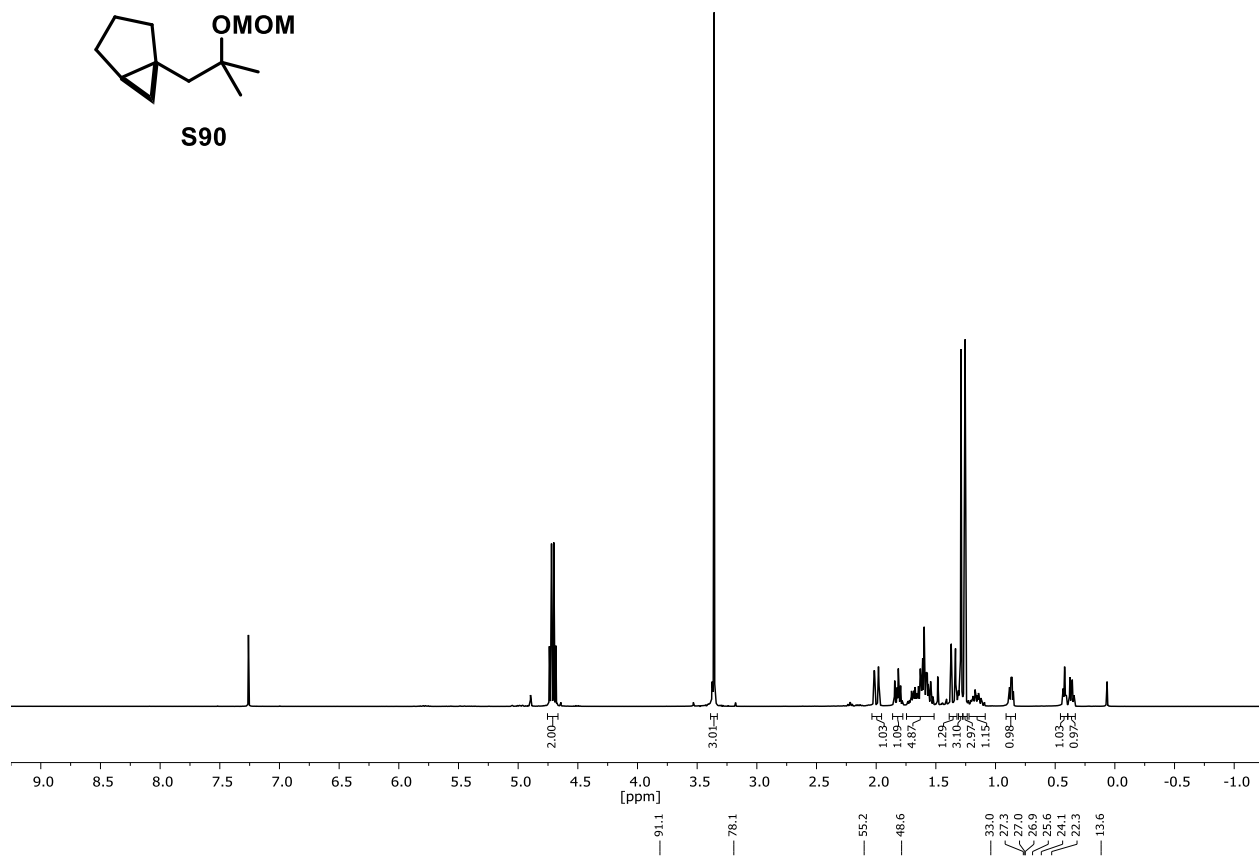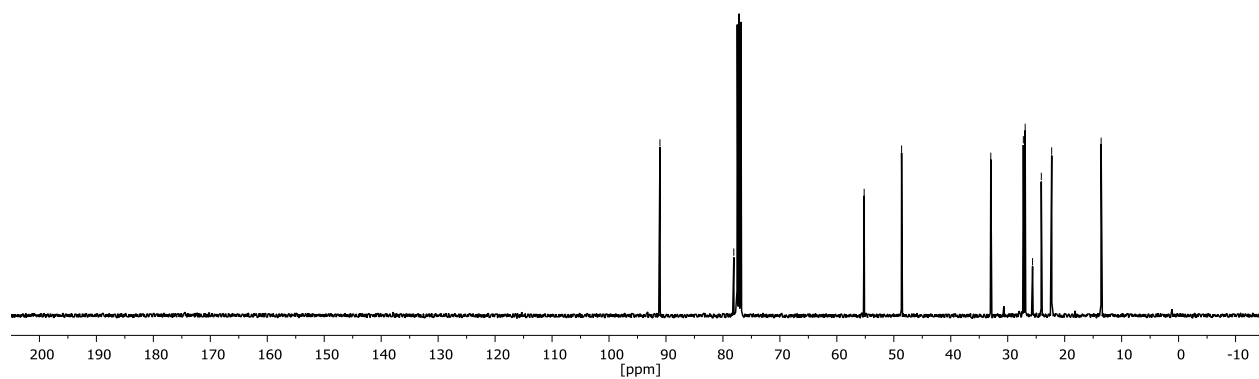

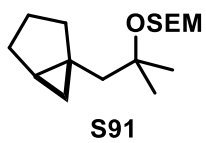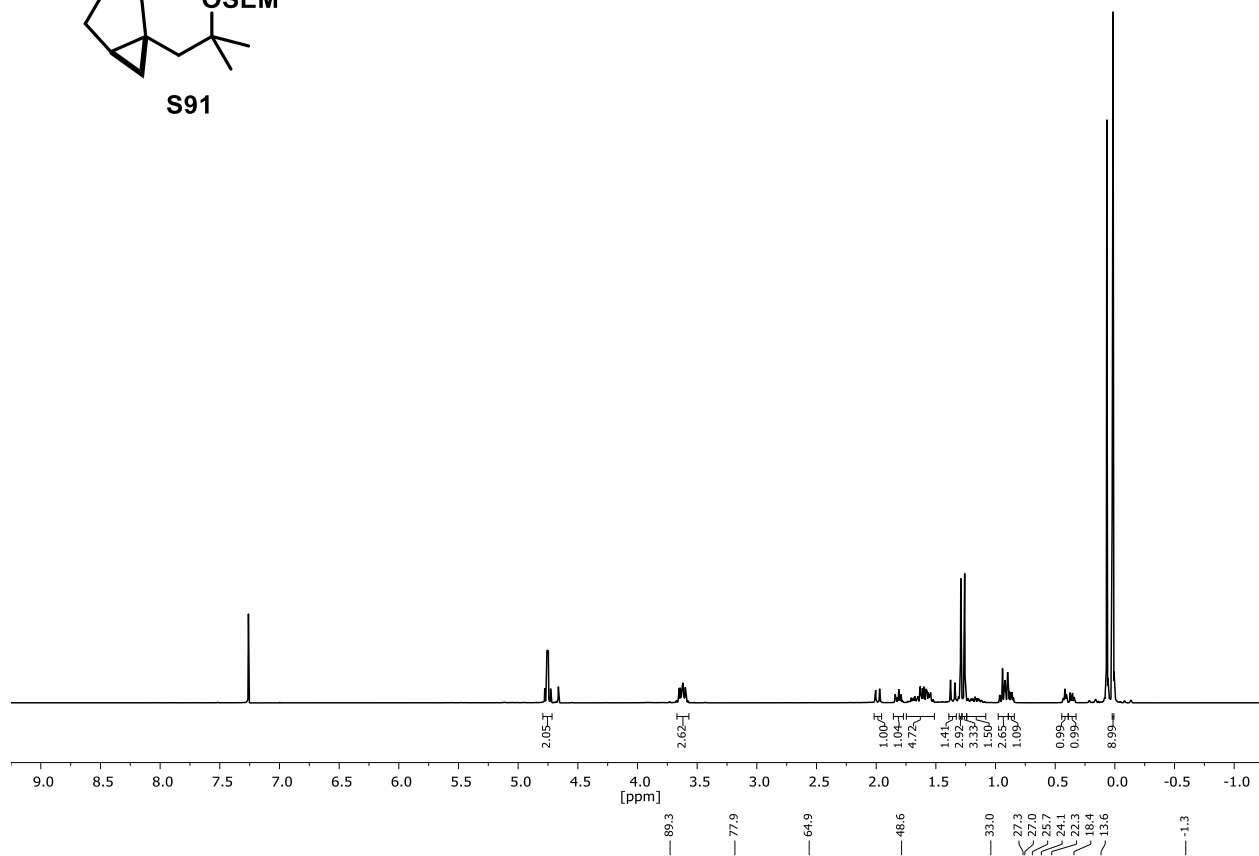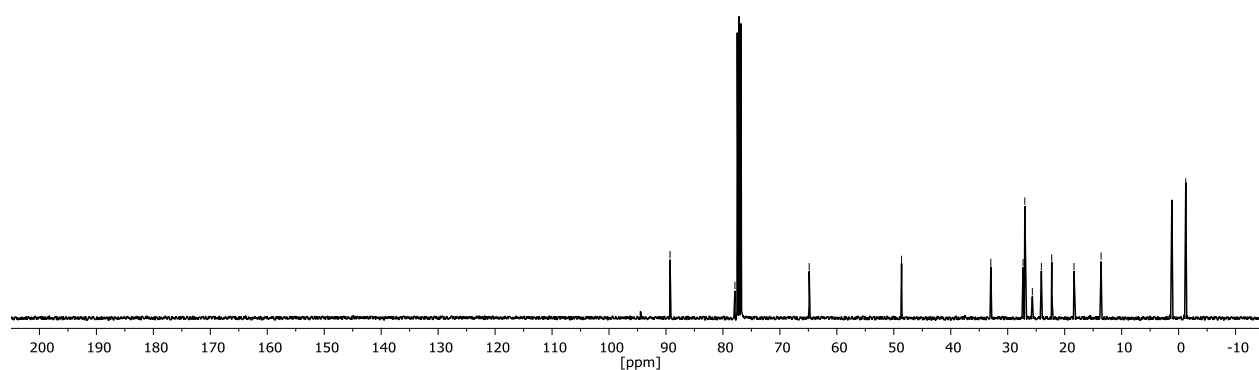



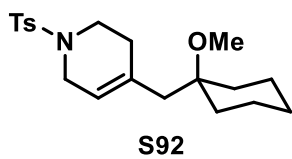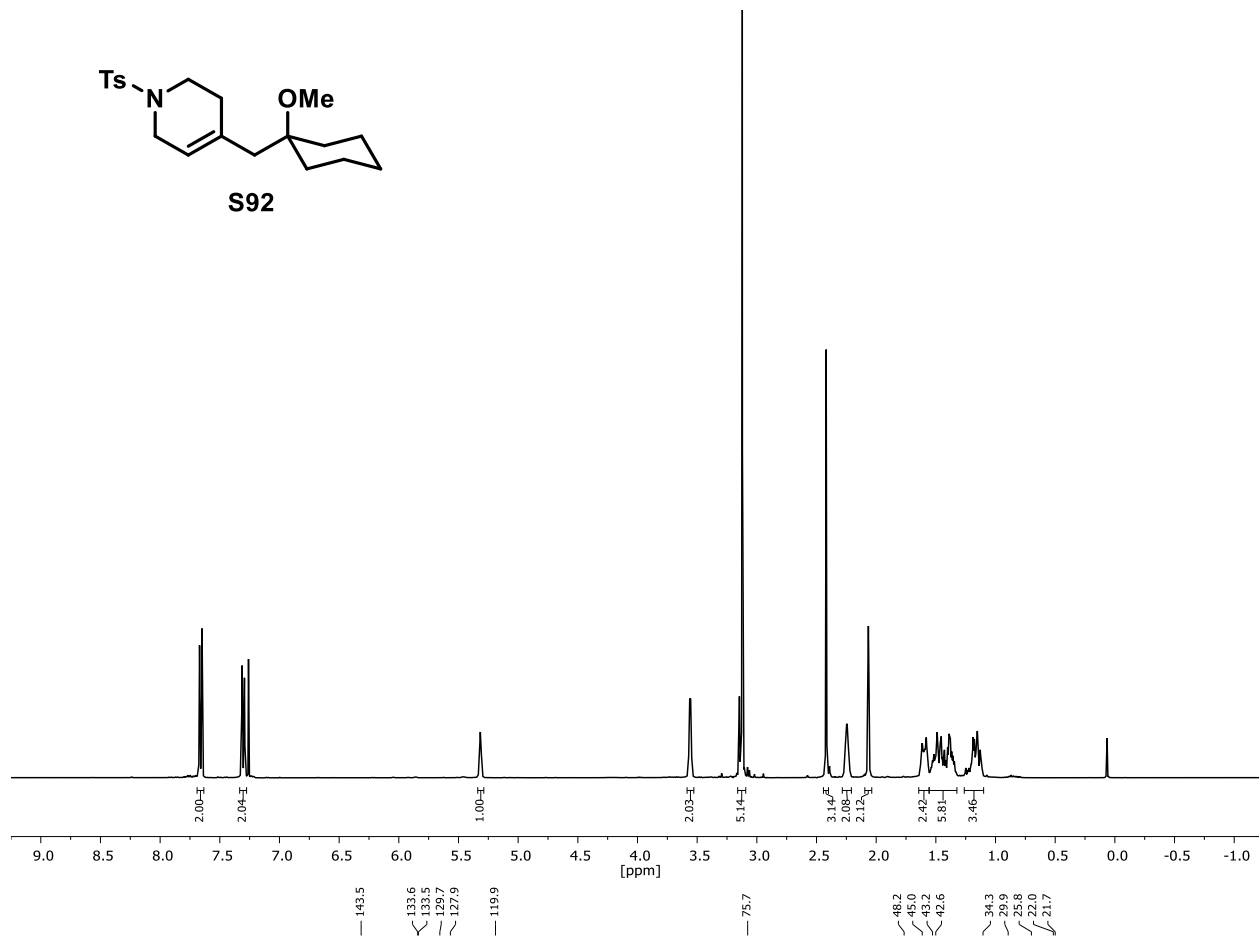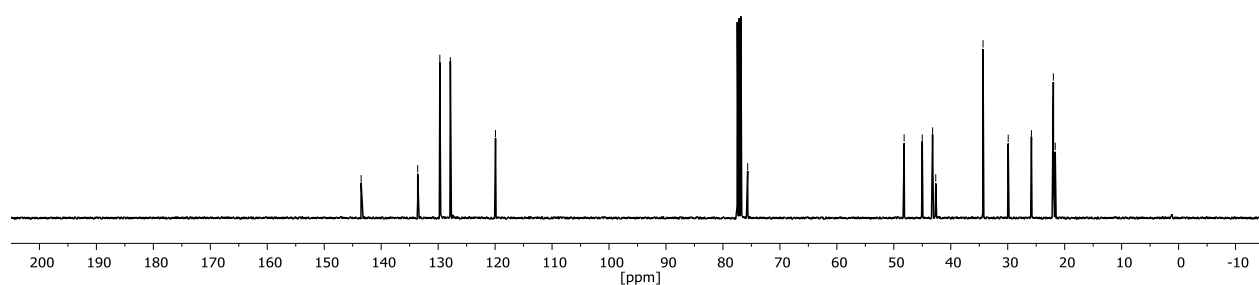

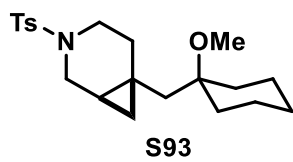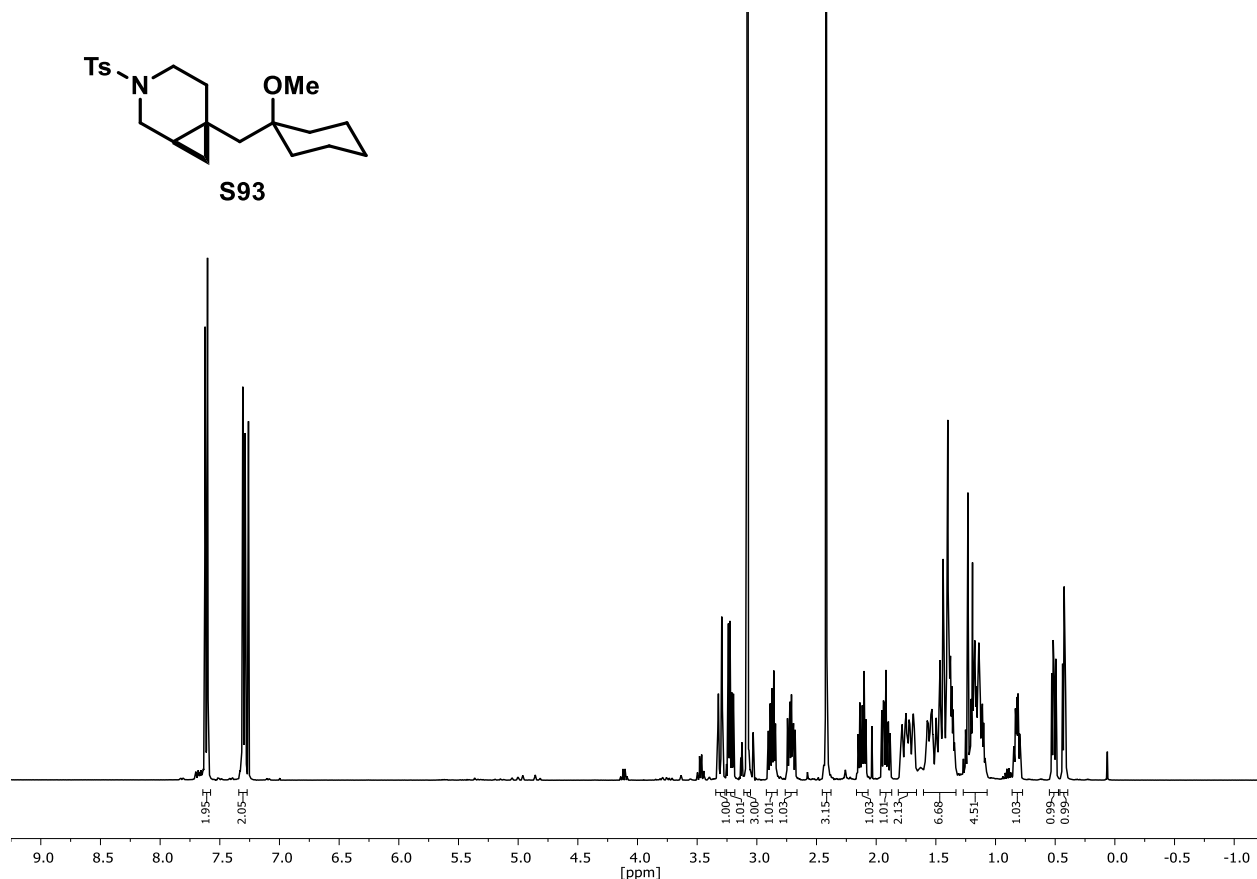

143.4  
 133.9  
 129.7  
 127.7  
 76.7  
 47.9  
 45.0  
 43.9  
 42.9  
 35.1  
 34.9  
 28.0  
 26.0  
 21.9  
 21.8  
 21.6  
 17.8  
 17.2  
 15.1

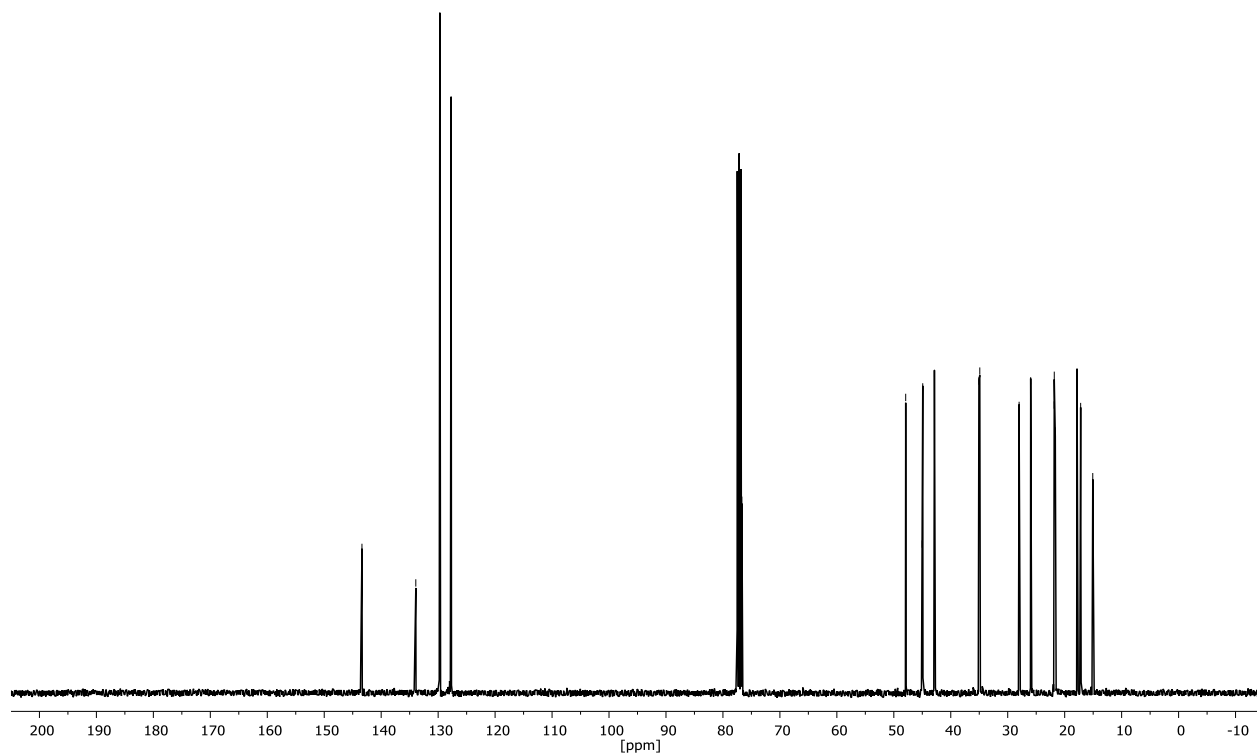



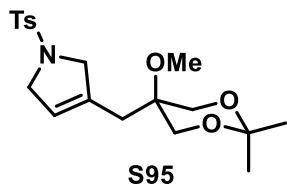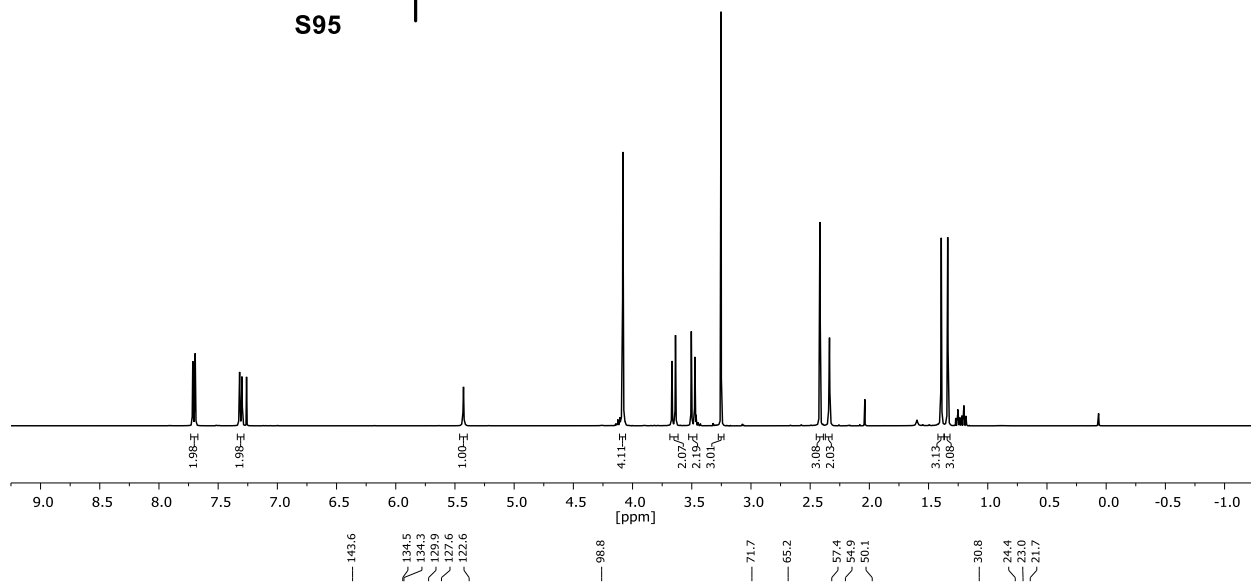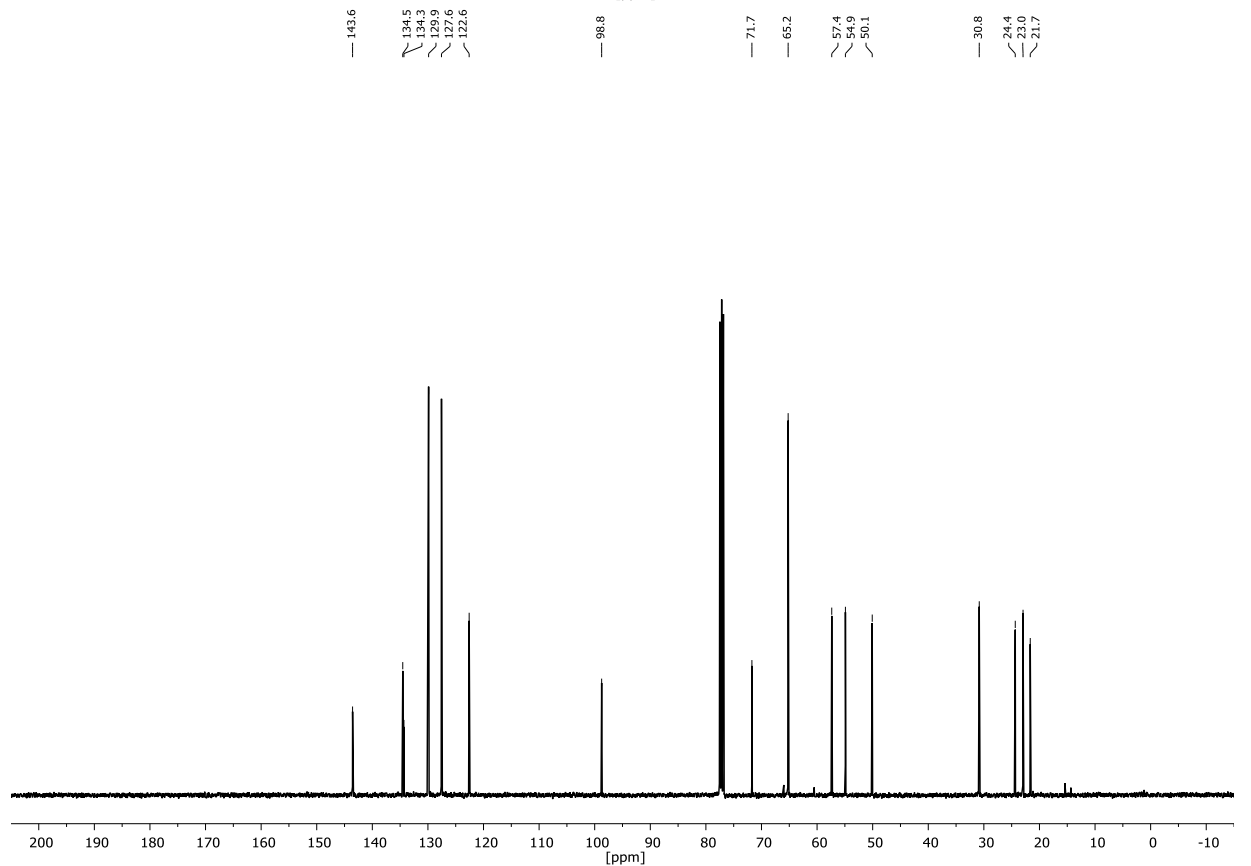

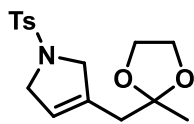

S96

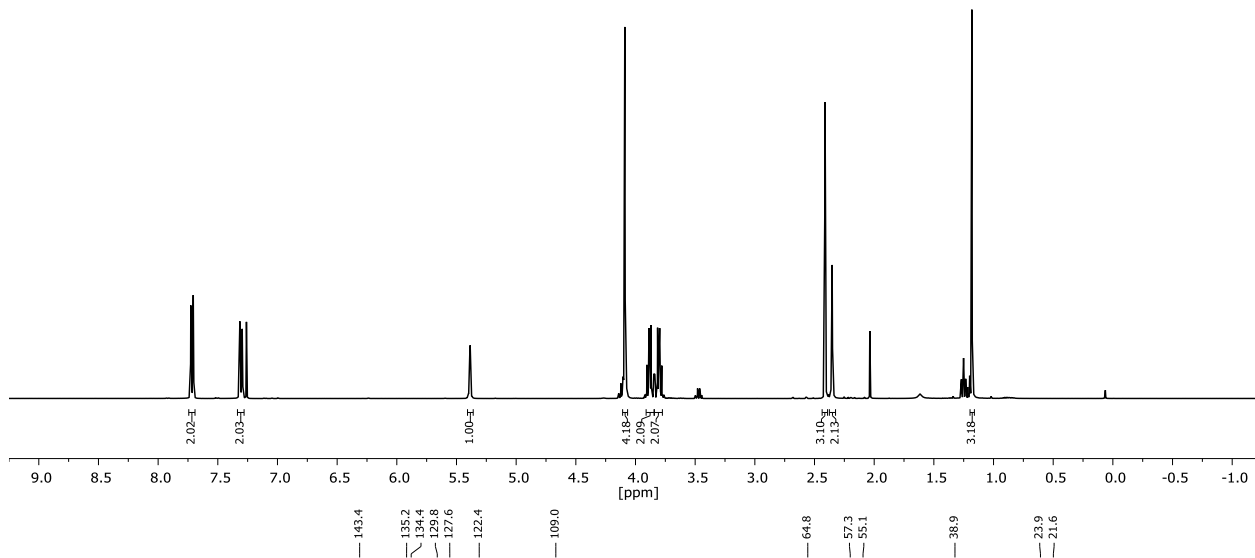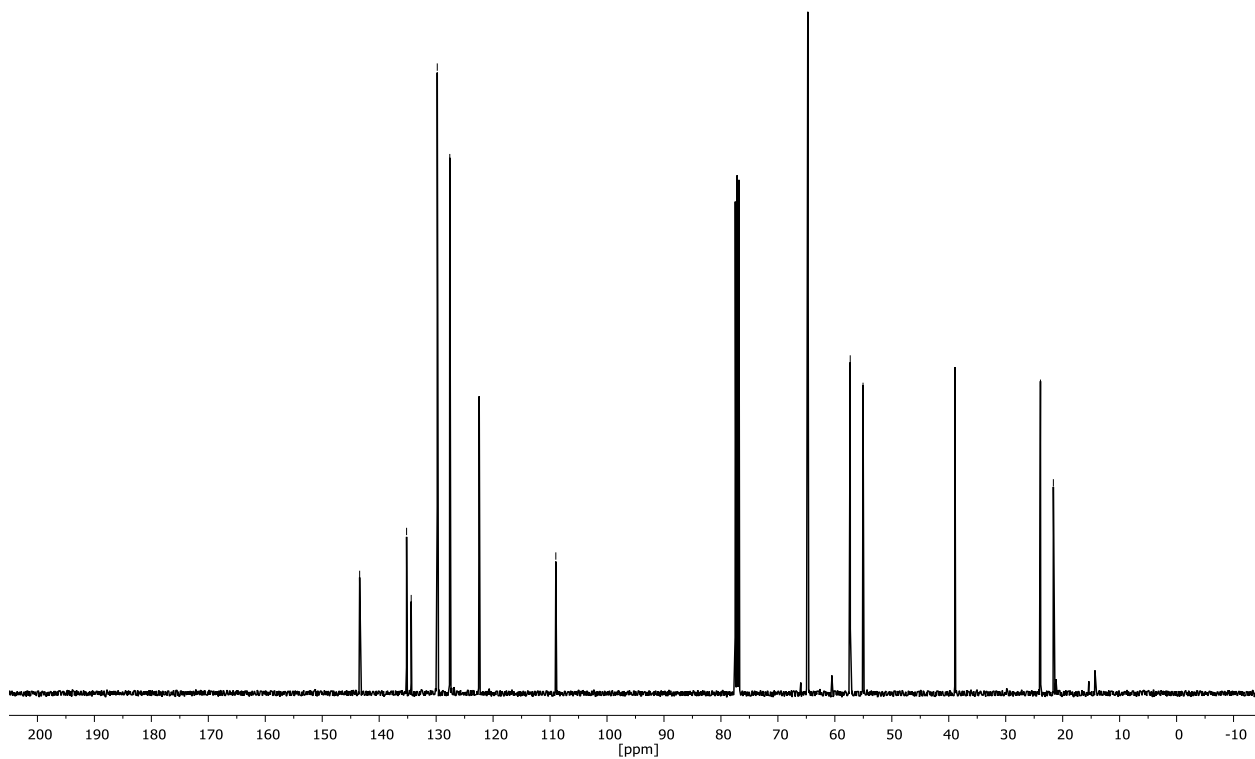

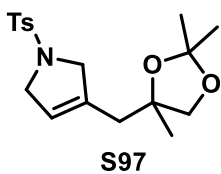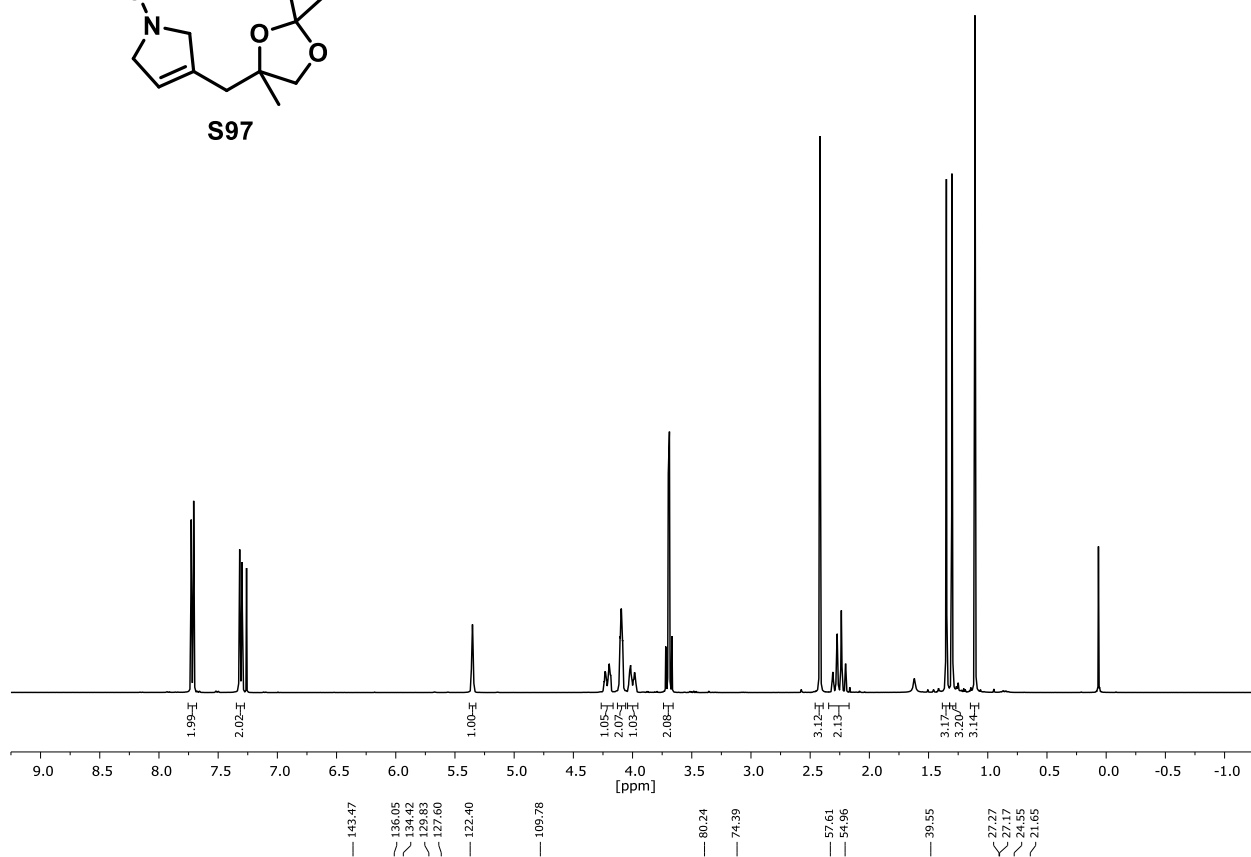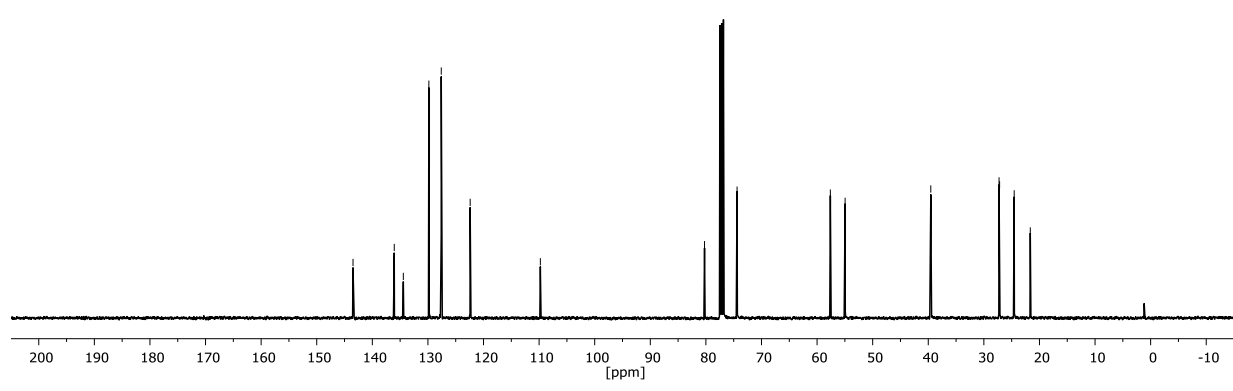

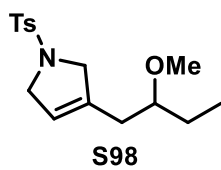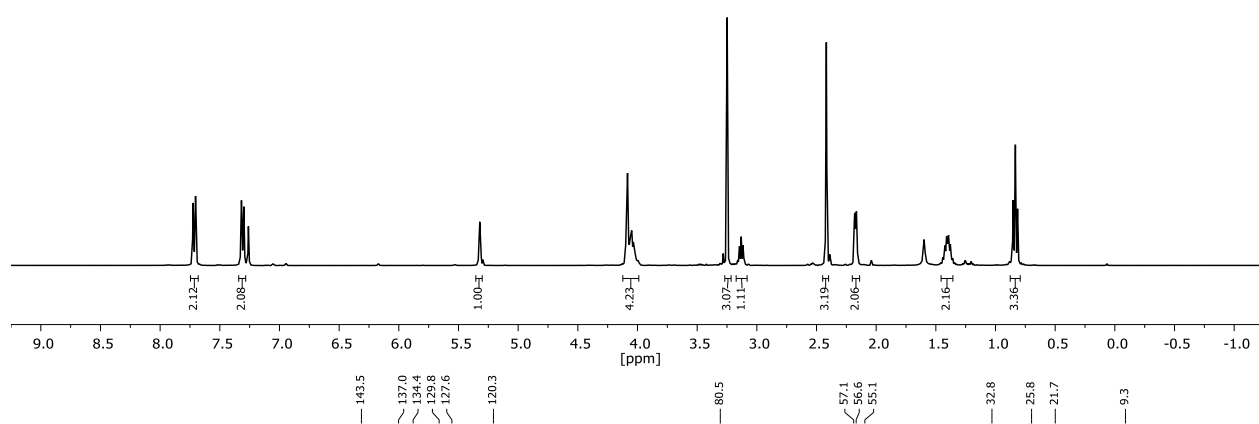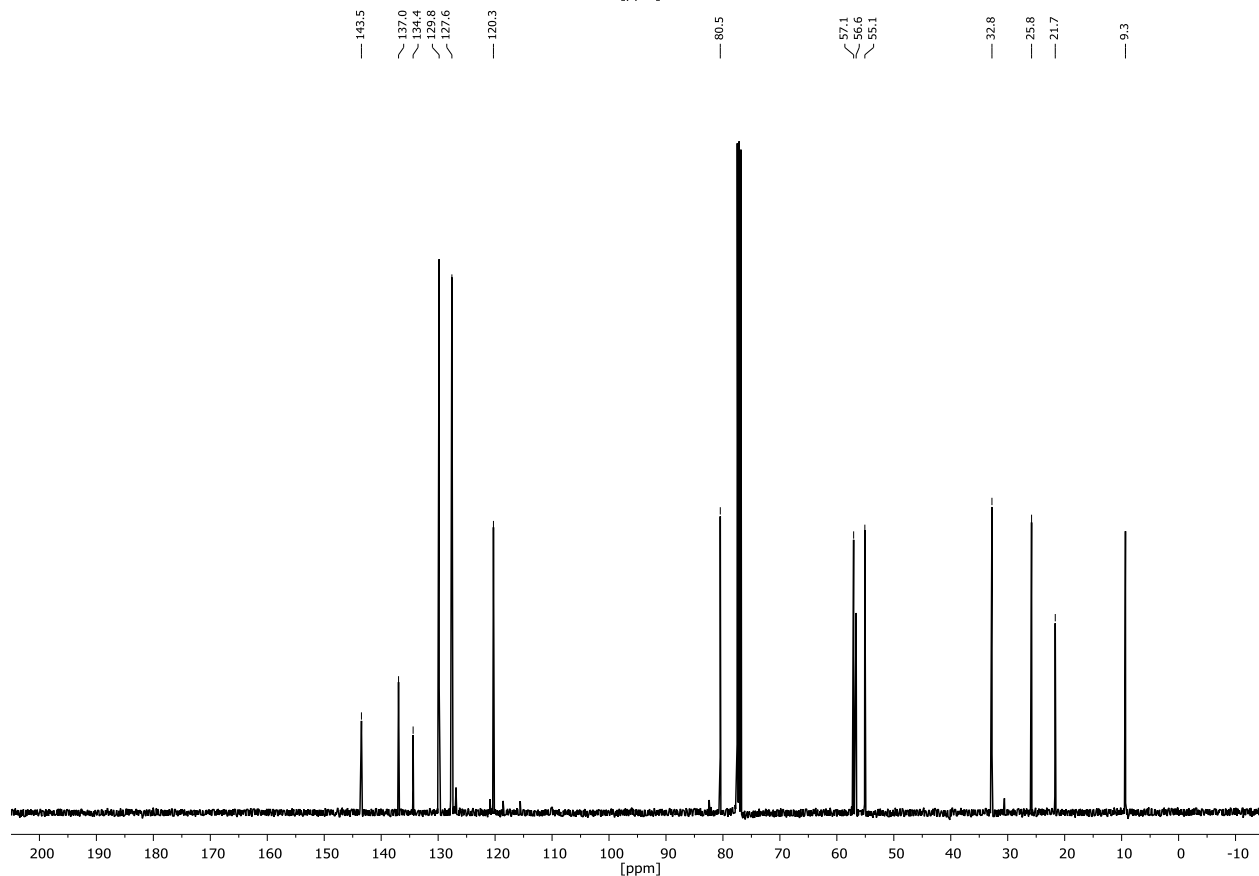

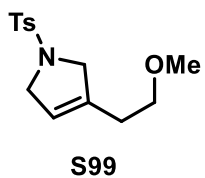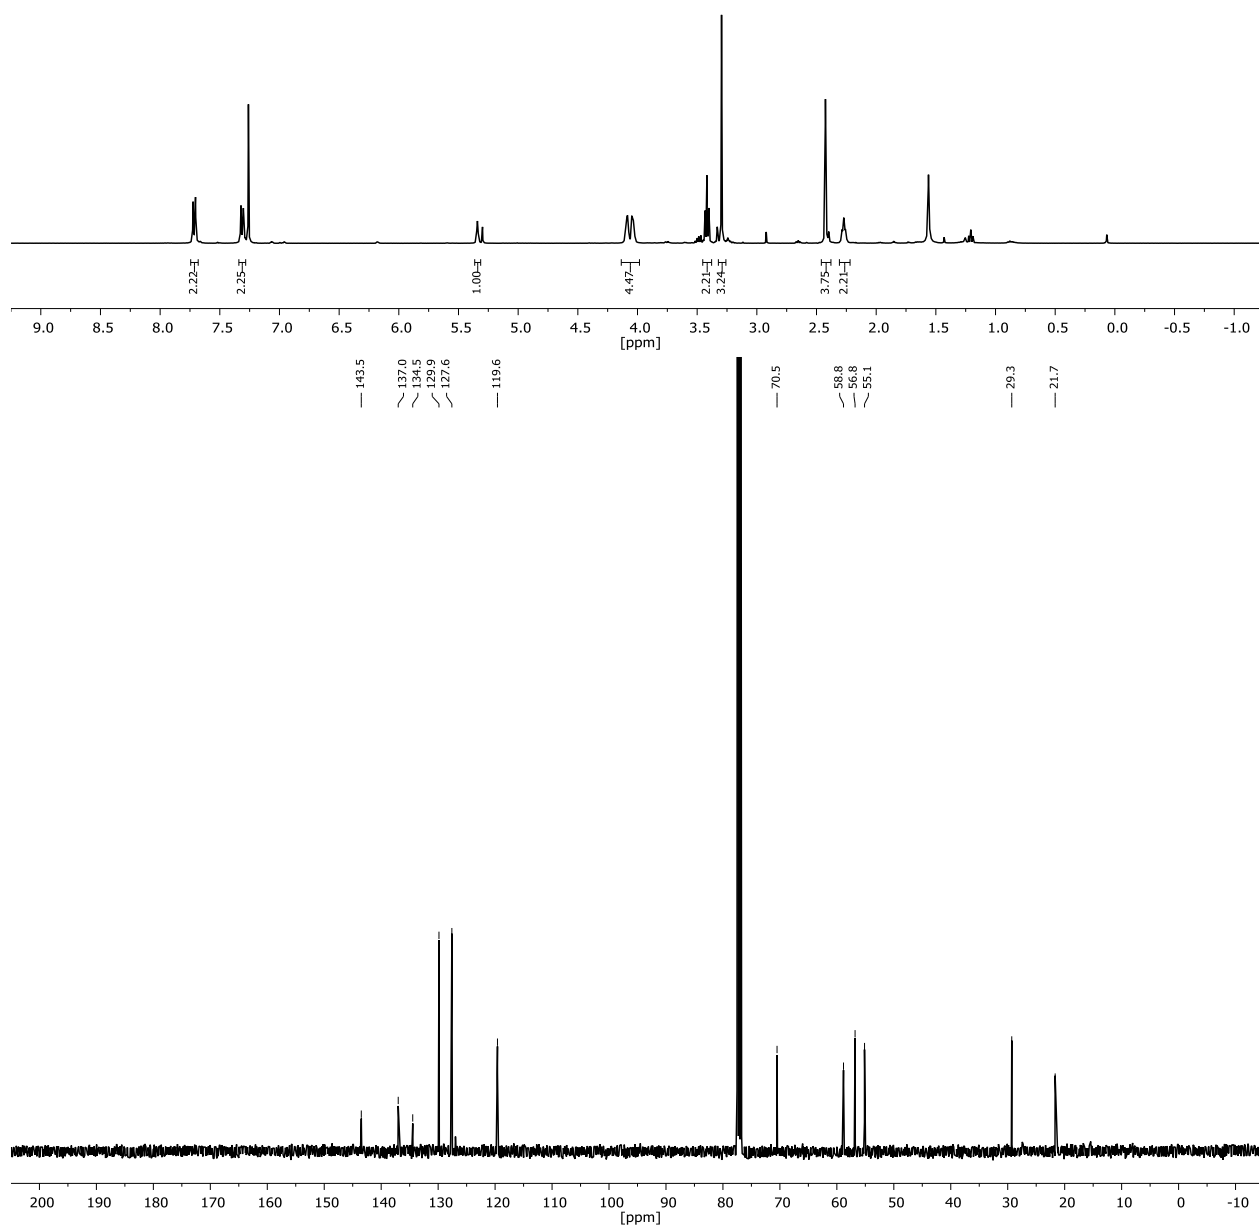



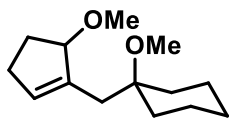

S100

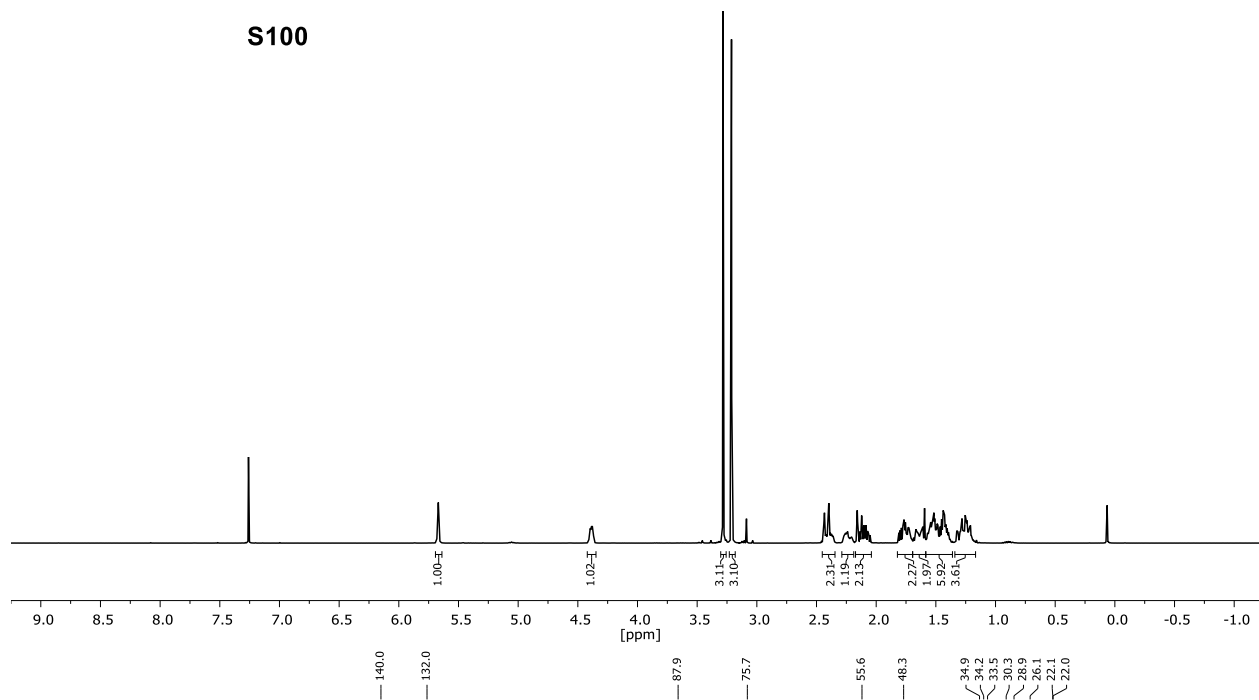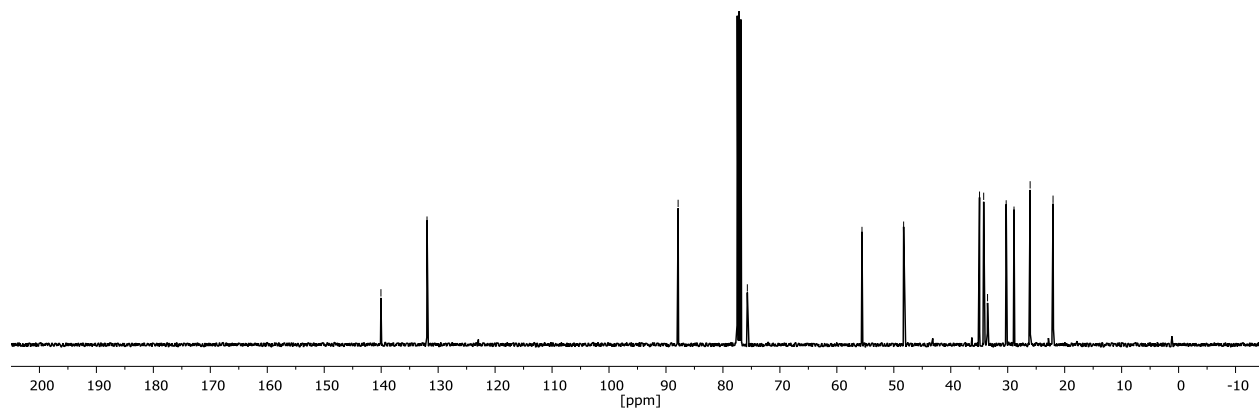

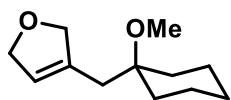

S101

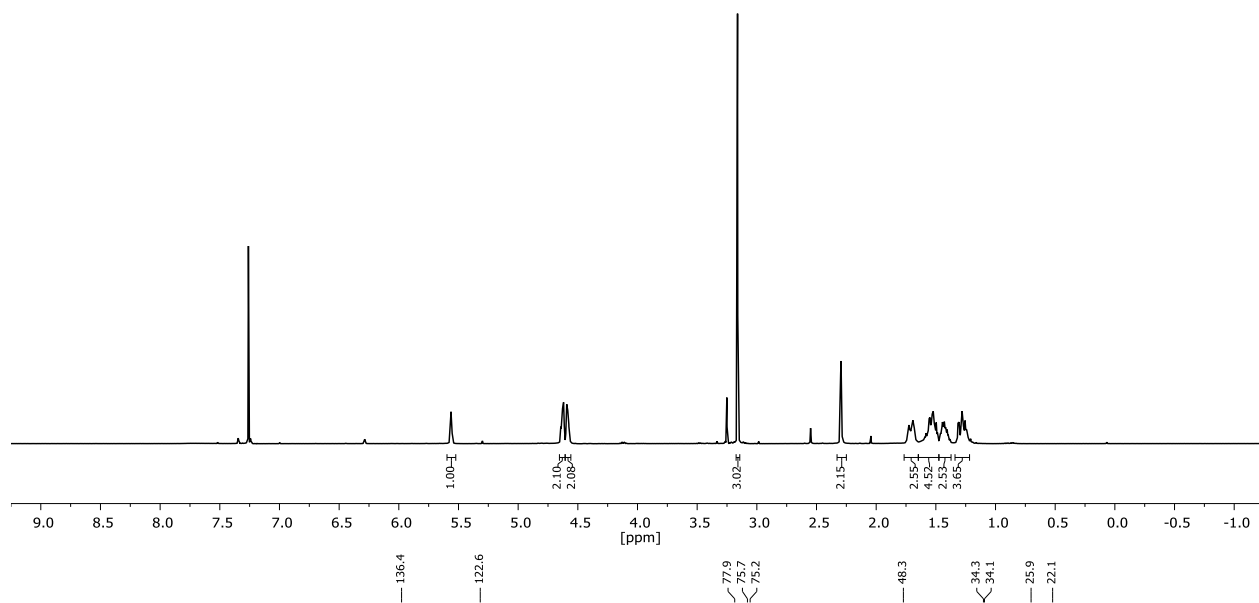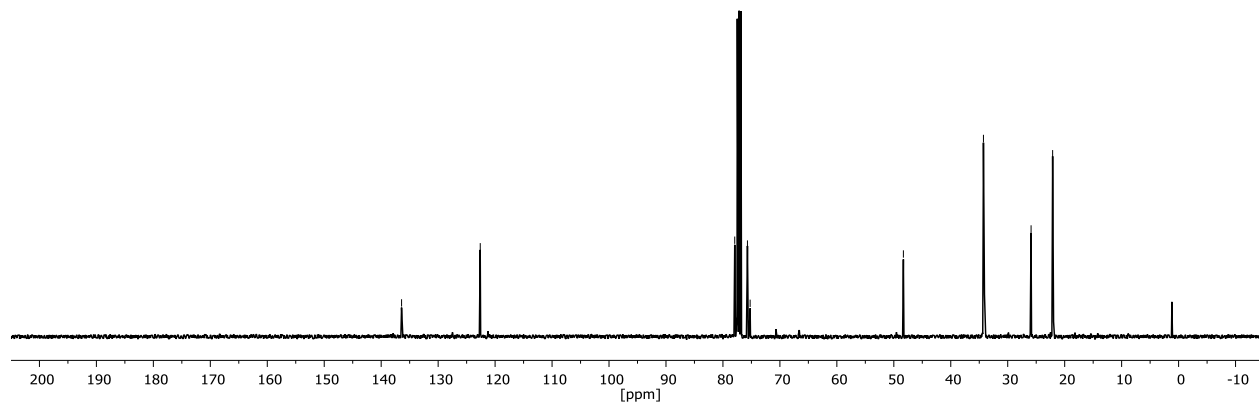

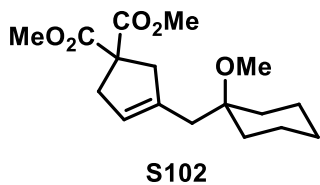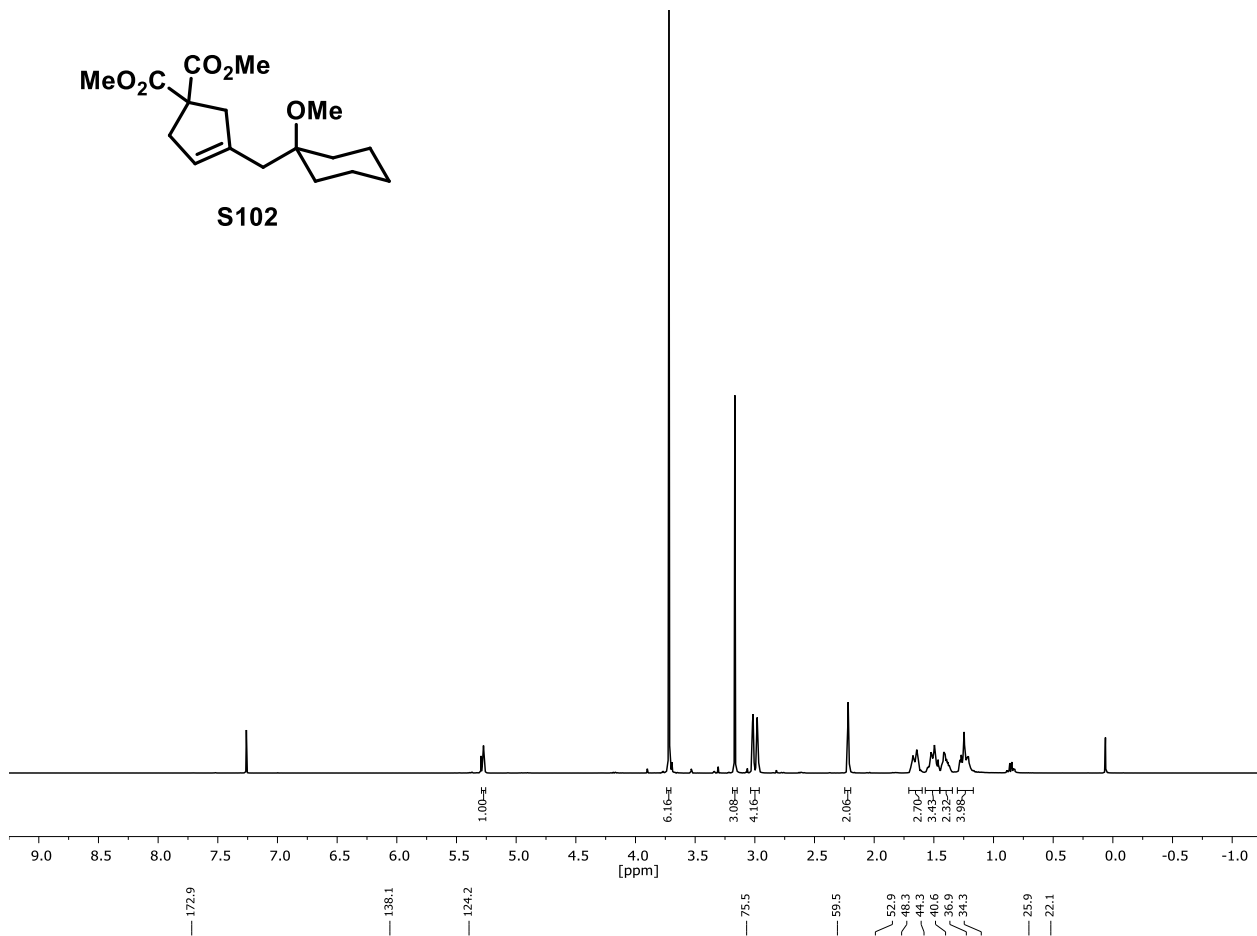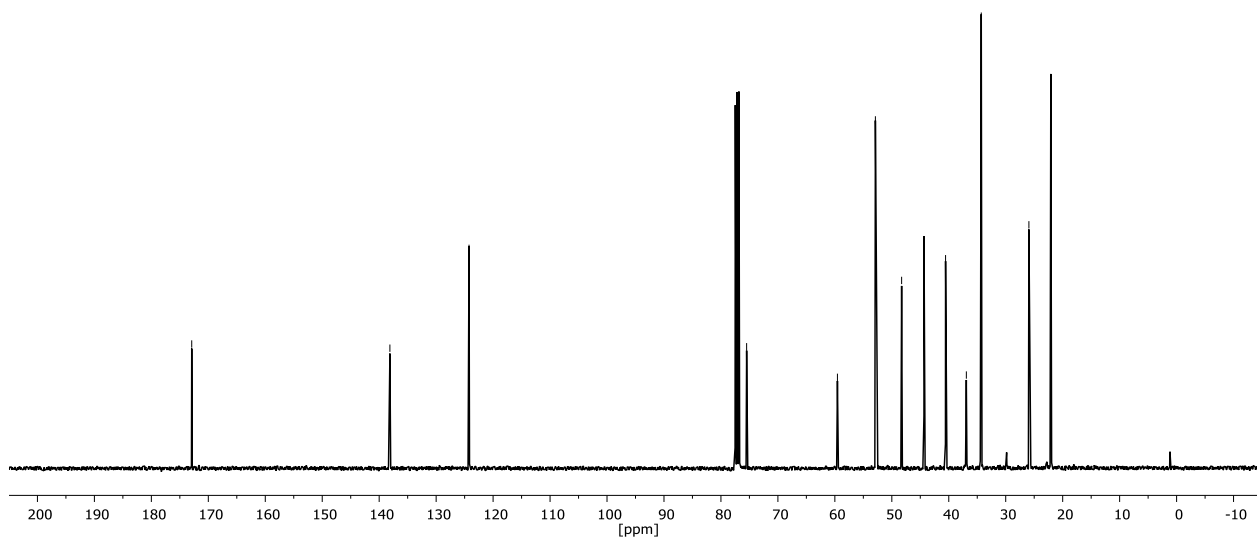

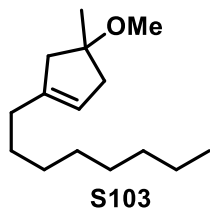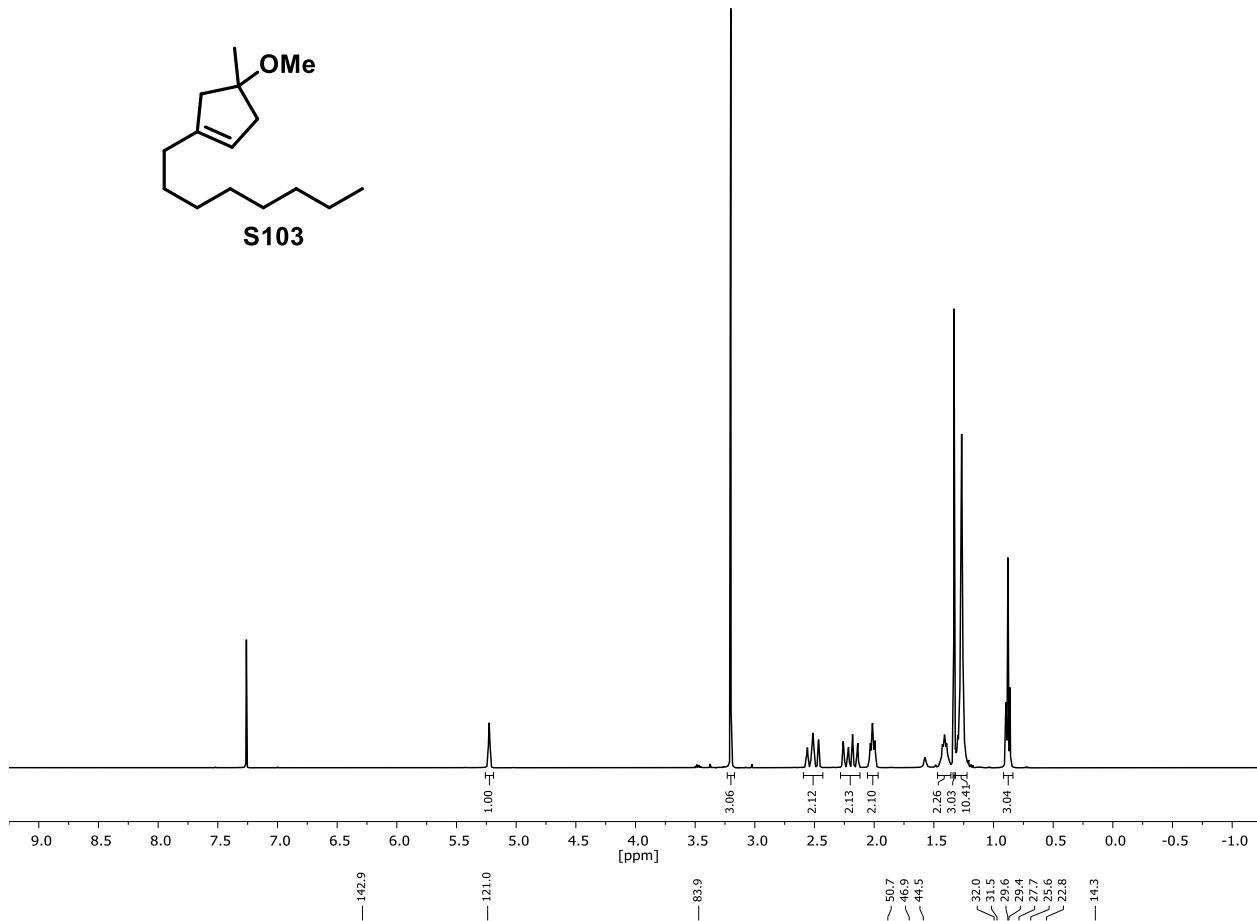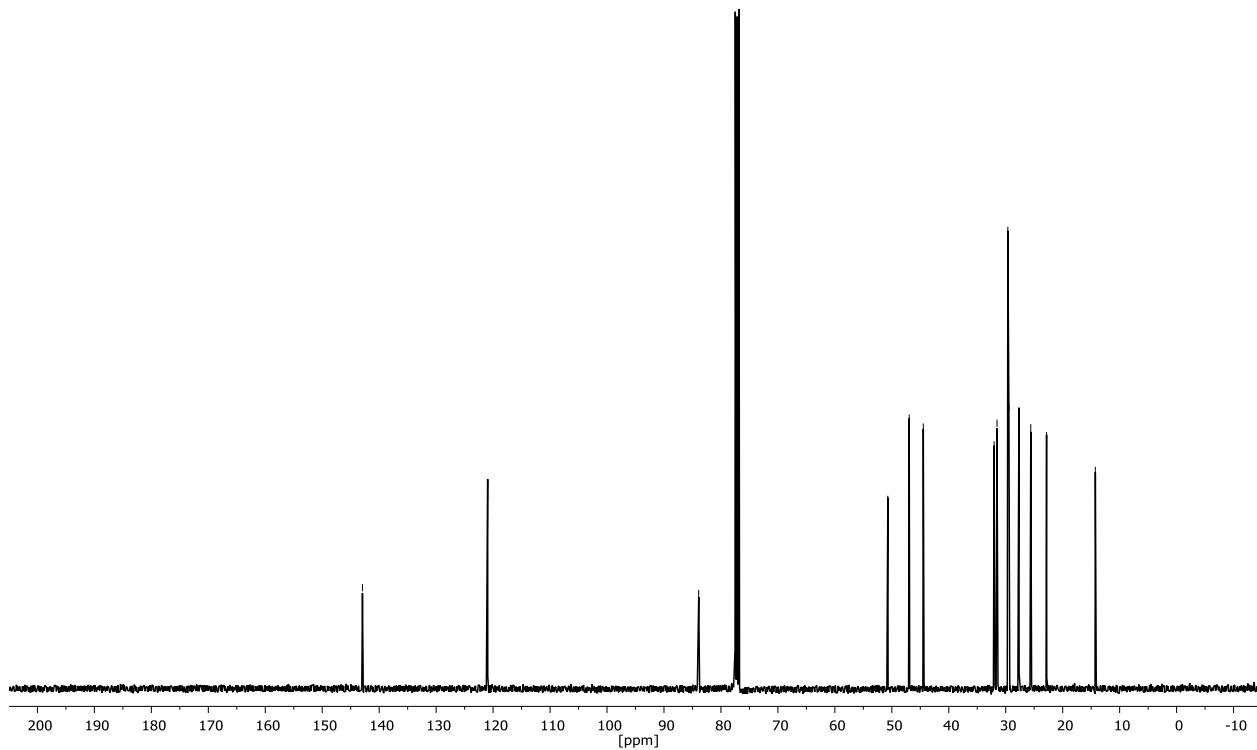

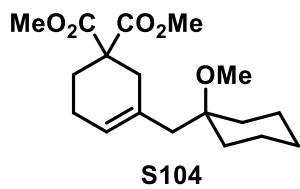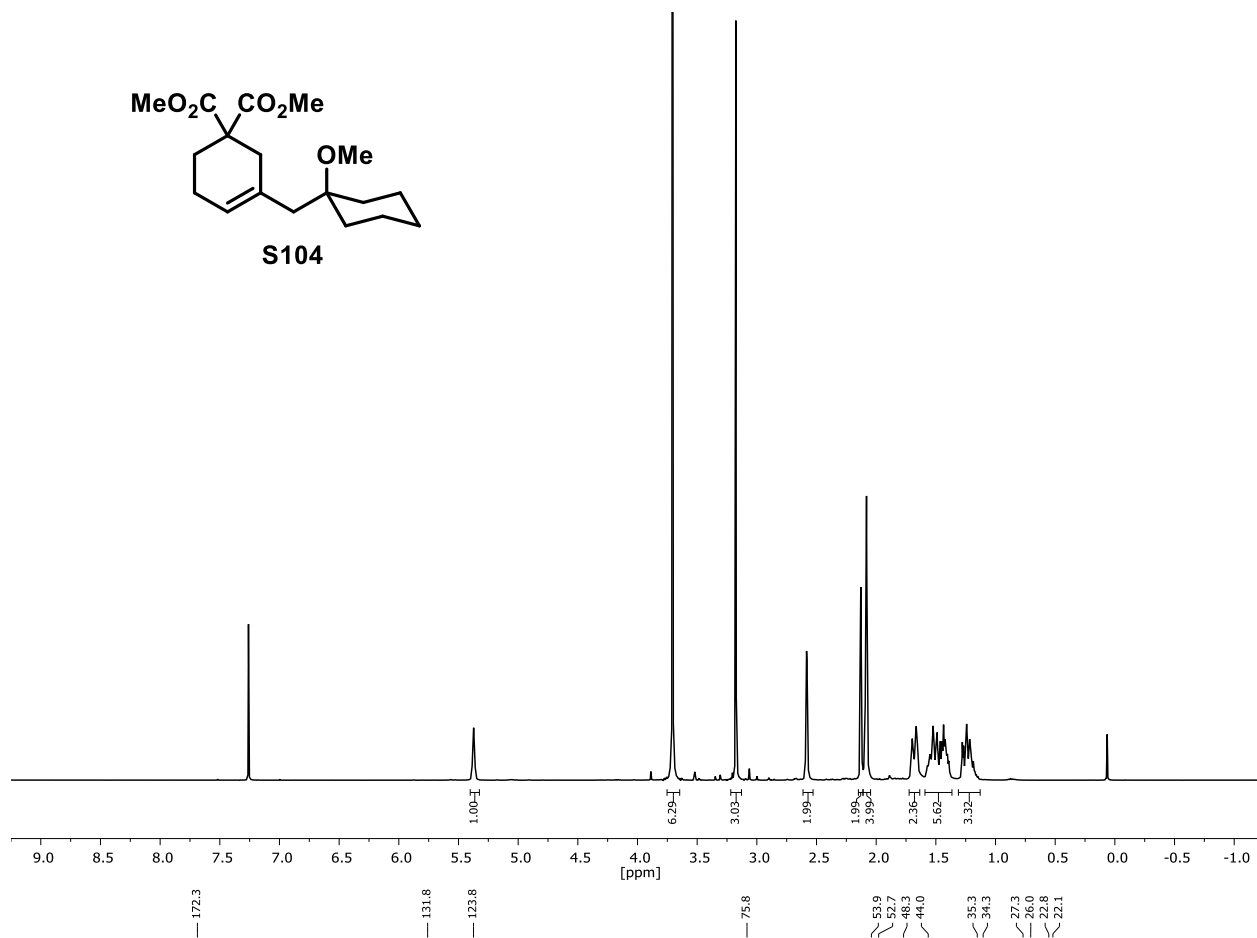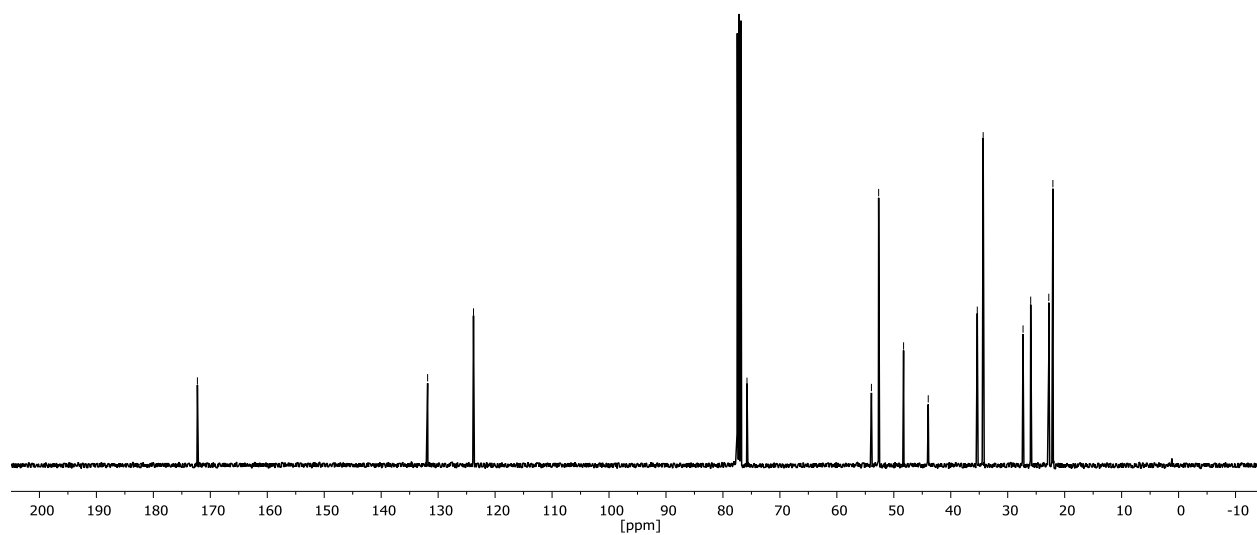

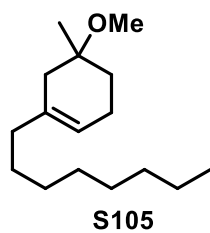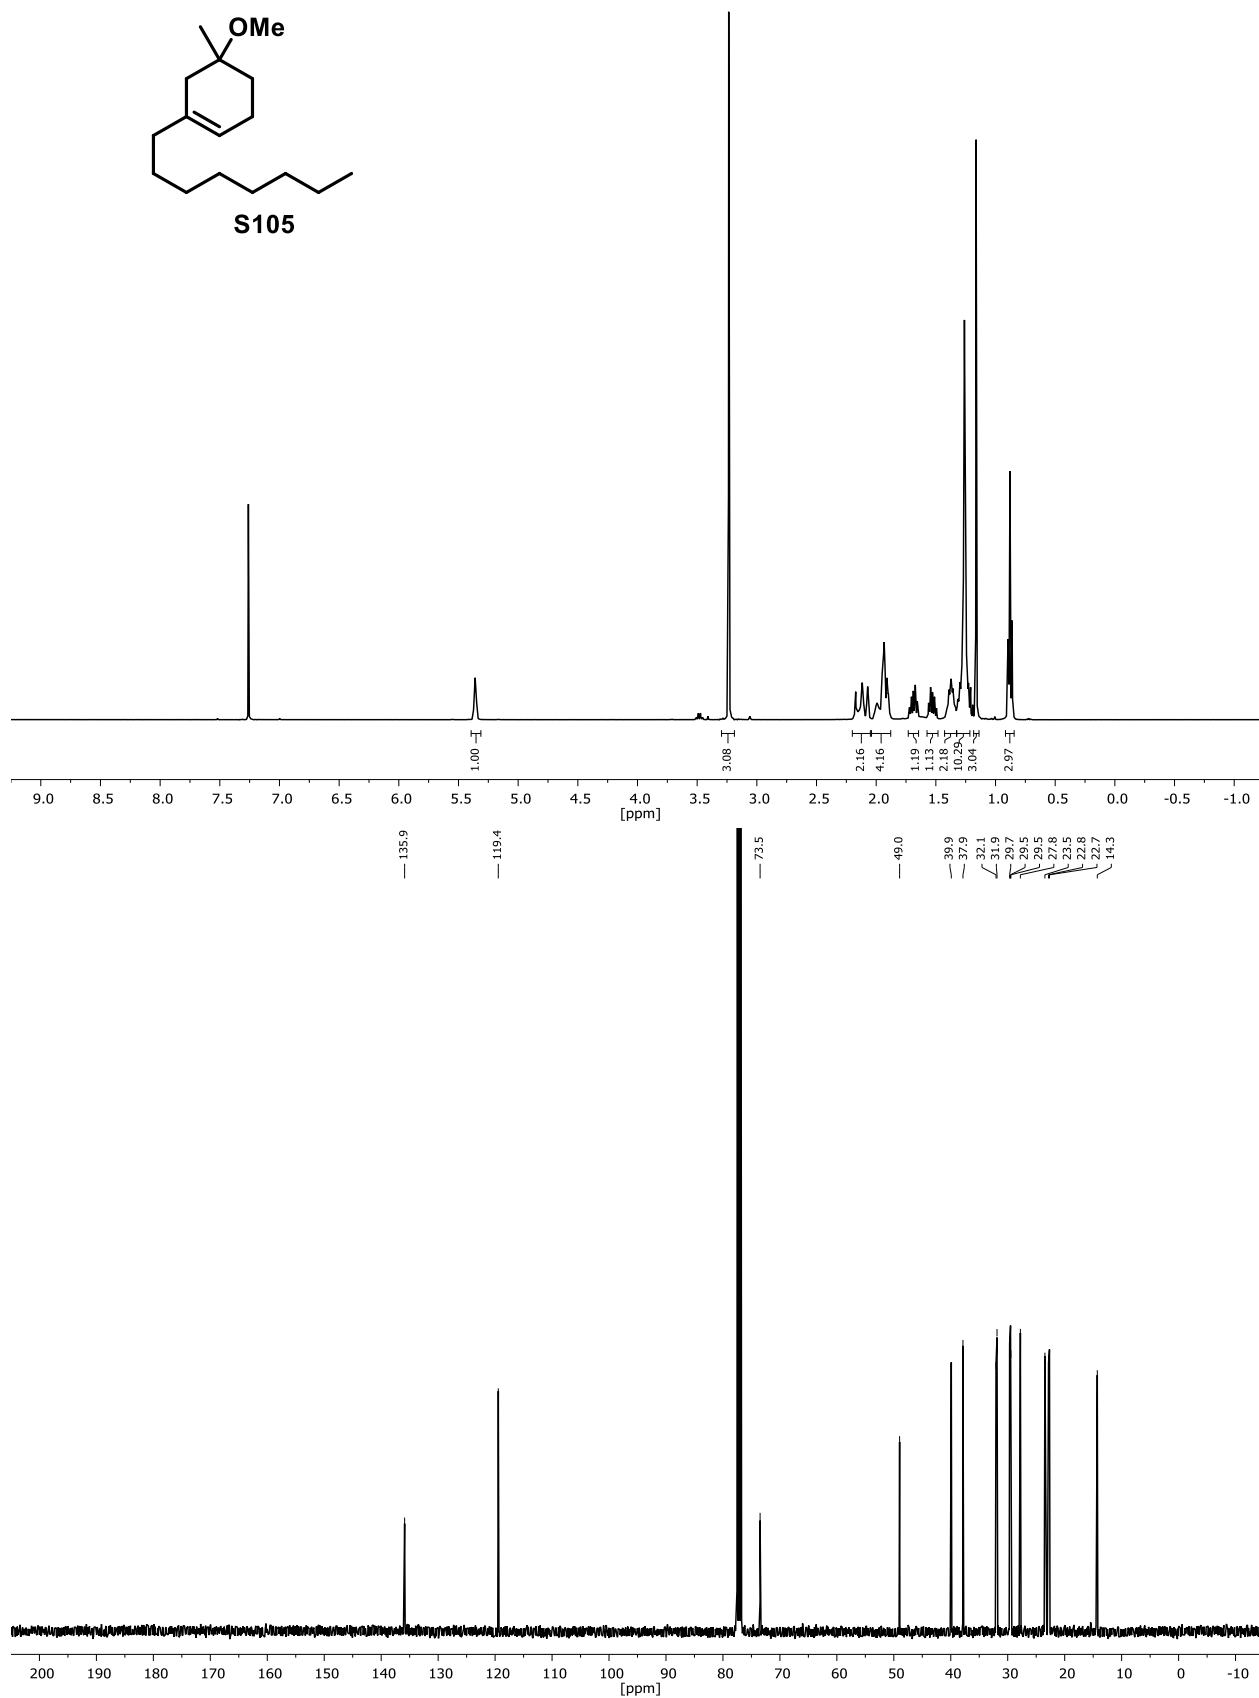

Supplement: ja0c07808_si_002.pdf [file ja0c07808_si_002.pdf]
