# Supplementary material
Source: PubMed Central journal article supplement (PMC7596760)
Supplement: ja0c07808_si_001.pdf [file ja0c07808_si_001.pdf]

# SUPPORTING INFORMATION

## Hydrogenative Metathesis of Enynes via Pianostool Ruthenium Carbene Complexes Formed by Alkyne *gem*-Hydrogenation

Sebastian Peil, Giovanni Bistoni, Richard Goddard, and Alois Fürstner\*

*Max-Planck-Institut for Kohlenforschung, 45470 Mülheim/Ruhr (Germany)*

*E-Mail: [fuerstner@kofo.mpg.de](mailto:fuerstner@kofo.mpg.de)*

### Table of Contents

|                                                                                          |      |
|------------------------------------------------------------------------------------------|------|
| SUPPORTING CRYSTALLOGRAPHIC DATA.....                                                    | S2   |
| HYDROGENATIVE CYCLOPROPANATION AND HYDROGENATIVE METATHESIS: SCOPE AND LIMITATIONS ..... | S18  |
| GENERAL INFORMATION .....                                                                | S23  |
| HYDROGENATIVE CYCLOPROPANATION AND METATHESIS .....                                      | S24  |
| BUILDING BLOCKS.....                                                                     | S24  |
| SUBSTRATES.....                                                                          | S37  |
| CYCLOPROPANATION AND METATHESIS REACTIONS .....                                          | S56  |
| TOTAL SYNTHESIS OF SINULARONE E AND F .....                                              | S66  |
| C-H INSERTIONS.....                                                                      | S78  |
| RUTHENIUM COMPLEXES .....                                                                | S81  |
| HEADSPACE GC ANALYSIS .....                                                              | S93  |
| ANALYSIS OF RUTHENACYCLOBUTANES A' AND D .....                                           | S97  |
| COMPUTATIONAL DETAILS .....                                                              | S100 |
| INFLECTION POINTS.....                                                                   | S101 |
| ENERGY PROFILES FOR ADDITIONAL SUBSTRATES .....                                          | S103 |
| OUTER-SPHERE VERSUS INNER-SPHERE MECHANISM .....                                         | S106 |
| HYDROGENATIVE C–H FUNCTIONALIZATION OF COMPOUND 20a.....                                 | S106 |
| STRUCTURE OF COMPLEX 41.....                                                             | S107 |
| OPTIMIZED STRUCTURES OF INTERMEDIATES AND TRANSITION STATES IN XYZ FORMAT .....          | S107 |
| REFERENCES .....                                                                         | S184 |

## SUPPORTING CRYSTALLOGRAPHIC DATA

### Single Crystal Structure Analysis of 14a

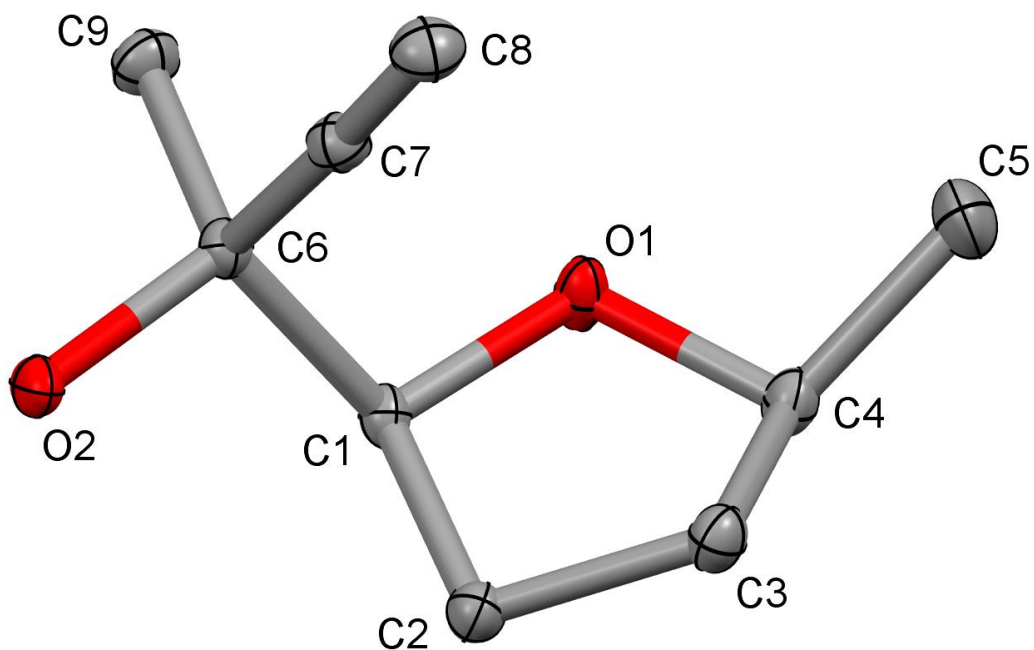

**Figure S1.** Molecular structure of **14a**. Atomic displacement ellipsoids shown at the 50 % probability level. H atoms are omitted for clarity.

**X-ray Crystal Structure Analysis of 14a:**  $C_9H_{14}O_2$ ,  $M_r = 154.20 \text{ g} \cdot \text{mol}^{-1}$ , colourless prism, crystal size  $0.050 \times 0.093 \times 0.221 \text{ mm}^3$ , orthorhombic, space group  $P2_12_12_1$  [19],  $a = 8.0553(5) \text{ \AA}$ ,  $b = 10.2611(6) \text{ \AA}$ ,  $c = 10.6161(7) \text{ \AA}$ ,  $V = 877.49(9) \text{ \AA}^3$ ,  $T = 100(2) \text{ K}$ ,  $Z = 4$ ,  $D_{calc} = 1.167 \text{ g} \cdot \text{cm}^3$ ,  $\lambda = 0.71073 \text{ \AA}$ ,  $\mu(Mo-K\alpha) = 0.081 \text{ mm}^{-1}$ , face-indexed absorption correction (SADABS,  $T_{min} = 0.99006$ ,  $T_{max} = 0.99763$ ), Bruker-AXS Mach3 diffractometer with Kappa-CCD detector and FR591 molybdenum rotating anode X-ray source equipped with Incoatec Helios X-ray optics,  $2.761 < \theta < 35.146^\circ$ , 34599 measured reflections, 3874 independent reflections, 3342 reflections with  $I > 2\sigma(I)$ ,  $R_{int} = 0.0445$ , 99.4 % coverage with an average redundancy of 15.46 to  $0.62 \text{ \AA}$  resolution.

INTENSITY STATISTICS FOR DATASET (mmm averaging)

| Resolution  | #Data | #Theory | %Complete | Redundancy | Mean I | Mean I/s | Rmerge | Rsigma |
|-------------|-------|---------|-----------|------------|--------|----------|--------|--------|
| Inf - 2.91  | 34    | 34      | 100.0     | 21.91      | 99.11  | 142.76   | 0.0193 | 0.0060 |
| 2.91 - 1.84 | 78    | 78      | 100.0     | 27.32      | 34.64  | 142.82   | 0.0213 | 0.0057 |
| 1.84 - 1.41 | 113   | 113     | 100.0     | 29.27      | 19.23  | 111.54   | 0.0271 | 0.0071 |
| 1.41 - 1.21 | 113   | 113     | 100.0     | 30.65      | 12.56  | 91.86    | 0.0348 | 0.0084 |
| 1.21 - 1.09 | 115   | 115     | 100.0     | 28.23      | 12.96  | 85.44    | 0.0385 | 0.0093 |
| 1.09 - 1.00 | 122   | 122     | 100.0     | 20.99      | 8.77   | 55.46    | 0.0528 | 0.0145 |
| 1.00 - 0.94 | 106   | 106     | 100.0     | 17.32      | 5.24   | 36.57    | 0.0746 | 0.0227 |
| 0.94 - 0.89 | 113   | 113     | 100.0     | 15.16      | 4.31   | 29.31    | 0.0880 | 0.0287 |
| 0.89 - 0.85 | 116   | 116     | 100.0     | 13.49      | 3.85   | 23.36    | 0.1033 | 0.0351 |
| 0.85 - 0.82 | 94    | 94      | 100.0     | 13.51      | 3.85   | 21.50    | 0.1089 | 0.0363 |
| 0.82 - 0.79 | 112   | 112     | 100.0     | 12.40      | 3.51   | 19.06    | 0.1032 | 0.0416 |
| 0.79 - 0.76 | 128   | 128     | 100.0     | 12.21      | 3.34   | 17.46    | 0.1302 | 0.0462 |
| 0.76 - 0.74 | 93    | 93      | 100.0     | 12.19      | 2.80   | 15.67    | 0.1506 | 0.0550 |
| 0.74 - 0.72 | 117   | 117     | 100.0     | 10.94      | 3.16   | 16.05    | 0.1359 | 0.0562 |
| 0.72 - 0.70 | 118   | 118     | 100.0     | 10.87      | 3.05   | 15.85    | 0.1518 | 0.0588 |
| 0.70 - 0.68 | 137   | 137     | 100.0     | 10.86      | 2.79   | 13.70    | 0.1643 | 0.0648 |
| 0.68 - 0.66 | 153   | 153     | 100.0     | 10.31      | 2.09   | 10.07    | 0.2144 | 0.0891 |
| 0.66 - 0.65 | 84    | 84      | 100.0     | 9.50       | 1.83   | 7.73     | 0.2650 | 0.1074 |
| 0.65 - 0.64 | 84    | 84      | 100.0     | 9.69       | 1.48   | 7.34     | 0.2818 | 0.1275 |
| 0.64 - 0.63 | 94    | 94      | 100.0     | 9.71       | 1.73   | 8.06     | 0.2615 | 0.1116 |
| 0.63 - 0.62 | 111   | 124     | 89.5      | 5.43       | 1.22   | 4.48     | 0.3384 | 0.2198 |
| -----       |       |         |           |            |        |          |        |        |
| Inf - 0.62  | 2235  | 2248    | 99.4      | 15.46      | 7.68   | 37.14    | 0.0446 | 0.0218 |
| -----       |       |         |           |            |        |          |        |        |

The structure was solved by *SHELXT* and refined as a perfect inversion twin by full-matrix least-squares (*SHELXL*) against  $F^2$ . The position and atomic displacement parameter of the hydroxyl hydrogen atom were refined. Otherwise, hydrogen atoms were refined using a riding model. Refinement of the structure resulted in  $R1 = 0.0384$  for 3342 [ $I > 2\sigma(I)$ ] and 0.0521 for all 3874 data, 106 parameters refined,  $wR2 = 0.0988$ ,  $Goof = S = 1.037$ , residual electron density +0.37 (0.76 Å from C3) / -0.23 (0.61 Å from C3) e · Å<sup>-3</sup>. **CCDC-2016740**.

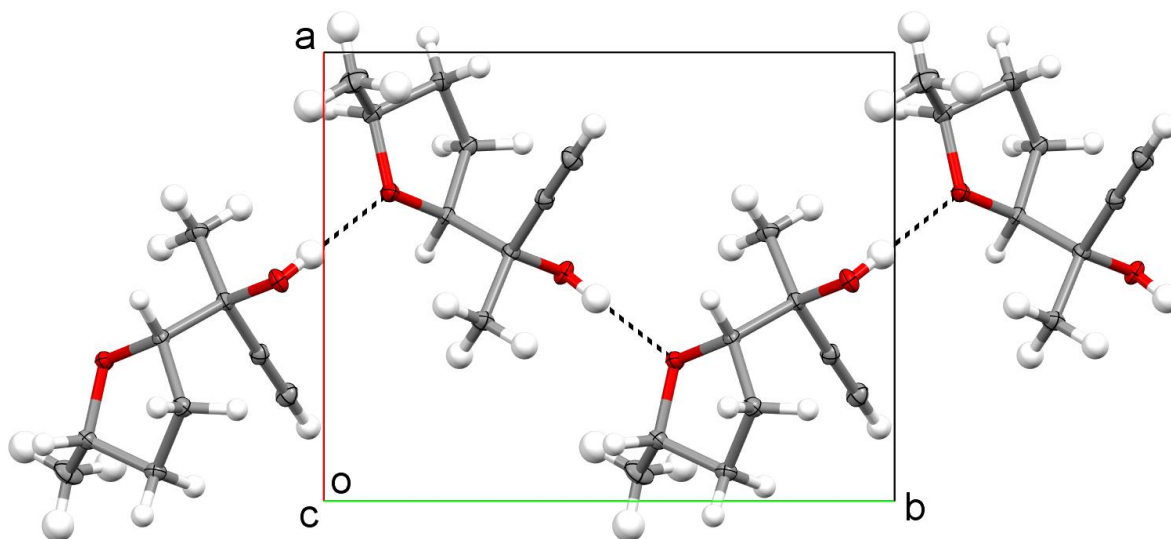

**Figure S2.** O-H...O hydrogen bonding interactions in solid **14a**.

### Single Crystal Structure Analysis of 14a'

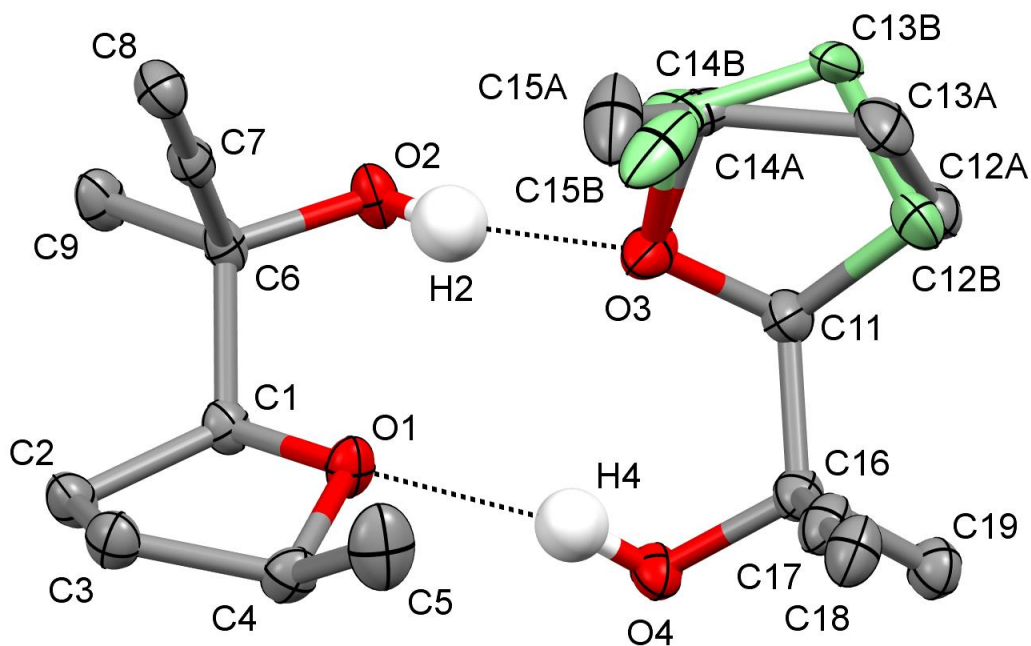

**Figure S3.** Molecular structure of the two independent molecules of **14a'** in the unit cell, showing the O-H $\cdots$ O hydrogen bonding interactions. The minor component of the disordered molecule (40%) is coloured light green. Atomic displacement ellipsoids shown at the 50 % probability level. H atoms, except for OH, are omitted for clarity.

**X-ray Crystal Structure Analysis of 14a'**: C<sub>9</sub>H<sub>14</sub>O<sub>2</sub>,  $M_r = 154.20 \text{ g} \cdot \text{mol}^{-1}$ , colourless prism, crystal size 0.051 x 0.111 x 0.132 mm<sup>3</sup>, monoclinic, space group  $P2_1/n$  [14],  $a = 8.9181(4) \text{ \AA}$ ,  $b = 21.7716(9) \text{ \AA}$ ,  $c = 9.1550(4) \text{ \AA}$ ,  $\beta = 94.822(2)^\circ$ ,  $V = 1771.3(1) \text{ \AA}^3$ ,  $T = 100(2) \text{ K}$ ,  $Z = 8$ ,  $D_{\text{calc}} = 1.157 \text{ g} \cdot \text{cm}^3$ ,  $\lambda = 0.71073 \text{ \AA}$ ,  $\mu(\text{Mo-K}\alpha) = 0.080 \text{ mm}^{-1}$ , face-indexed absorption correction (SADABS,  $T_{\text{min}} = 0.99275$ ,  $T_{\text{max}} = 0.99680$ ), Bruker-AXS Mach3 diffractometer with Kappa-CCD detector and FR591 molybdenum rotating anode X-ray source equipped with Incoatec Helios X-ray optics,  $1.871 < \theta < 35.262^\circ$ , 71080 measured reflections, 7848 independent reflections, 5775 reflections with  $I > 2\sigma(I)$ ,  $R_{\text{int}} = 0.0374$ , 98.8 % coverage with an average redundancy of 8.88 to 0.62  $\text{\AA}$  resolution.

## INTENSITY STATISTICS FOR DATASET

| Resolution  | #Data | #Theory | %Complete | Redundancy | Mean I | Mean I/s | Rmerge | Rsigma |
|-------------|-------|---------|-----------|------------|--------|----------|--------|--------|
| Inf - 2.60  | 121   | 121     | 100.0     | 16.54      | 61.87  | 144.33   | 0.0176 | 0.0051 |
| 2.60 - 1.70 | 290   | 290     | 100.0     | 18.22      | 18.48  | 115.29   | 0.0174 | 0.0058 |
| 1.70 - 1.34 | 401   | 401     | 100.0     | 18.30      | 8.21   | 81.19    | 0.0261 | 0.0080 |
| 1.34 - 1.17 | 399   | 399     | 100.0     | 17.98      | 6.13   | 64.45    | 0.0339 | 0.0100 |
| 1.17 - 1.06 | 424   | 424     | 100.0     | 15.43      | 5.78   | 55.02    | 0.0356 | 0.0120 |
| 1.06 - 0.98 | 412   | 412     | 100.0     | 11.37      | 3.26   | 31.64    | 0.0567 | 0.0217 |
| 0.98 - 0.92 | 424   | 424     | 100.0     | 9.58       | 2.17   | 22.49    | 0.0747 | 0.0321 |
| 0.92 - 0.88 | 340   | 340     | 100.0     | 8.23       | 1.51   | 15.70    | 0.0945 | 0.0464 |
| 0.88 - 0.84 | 417   | 417     | 100.0     | 7.82       | 1.54   | 14.47    | 0.0998 | 0.0491 |
| 0.84 - 0.80 | 514   | 514     | 100.0     | 7.34       | 1.23   | 11.12    | 0.1246 | 0.0631 |
| 0.80 - 0.78 | 284   | 284     | 100.0     | 7.11       | 1.25   | 10.82    | 0.1193 | 0.0654 |
| 0.78 - 0.75 | 495   | 495     | 100.0     | 6.77       | 1.16   | 9.70     | 0.1370 | 0.0751 |
| 0.75 - 0.73 | 383   | 383     | 100.0     | 6.63       | 1.22   | 9.65     | 0.1460 | 0.0766 |
| 0.73 - 0.71 | 412   | 412     | 100.0     | 6.32       | 0.96   | 7.98     | 0.1772 | 0.0973 |
| 0.71 - 0.69 | 470   | 470     | 100.0     | 6.08       | 1.00   | 7.63     | 0.1721 | 0.0992 |
| 0.69 - 0.68 | 264   | 264     | 100.0     | 5.84       | 0.70   | 5.71     | 0.2146 | 0.1379 |
| 0.68 - 0.66 | 564   | 564     | 100.0     | 5.73       | 0.69   | 5.37     | 0.2372 | 0.1458 |
| 0.66 - 0.65 | 316   | 316     | 100.0     | 5.47       | 0.61   | 4.60     | 0.2722 | 0.1747 |
| 0.65 - 0.64 | 306   | 306     | 100.0     | 5.51       | 0.50   | 3.96     | 0.3175 | 0.2096 |
| 0.64 - 0.62 | 798   | 897     | 89.0      | 4.20       | 0.40   | 2.89     | 0.3561 | 0.3115 |
| -----       |       |         |           |            |        |          |        |        |
| 0.72 - 0.62 | 2920  | 3019    | 96.7      | 5.33       | 0.65   | 5.03     | 0.2390 | 0.1653 |
| Inf - 0.62  | 8034  | 8133    | 98.8      | 8.88       | 3.56   | 24.91    | 0.0365 | 0.0258 |
| -----       |       |         |           |            |        |          |        |        |

The structure was solved by *SHELXT* and refined by full-matrix least-squares (*SHELXL*) against  $F^2$ . One of the two independent molecules in the asymmetric unit is partially disordered (0.6:0.4). The positions and atomic displacement parameters of the hydroxyl hydrogen atoms and neighbouring C-H hydrogen atoms were refined. Otherwise, hydrogen atoms were refined using a riding model. Refinement of the structure resulted in  $R1 = 0.043$  for 5775 [ $I > 2\sigma(I)$ ] and 0.0657 for all 7848 data, 260 parameters refined,  $wR2 = 0.1237$ ,  $Goof = S = 1.034$ , residual electron density +0.35 (0.74 Å from C16) / -0.26 (0.59 Å from C6)  $e \cdot \text{Å}^{-3}$ . **CCDC-2016741**.

## Single Crystal Structure Analysis of 24b

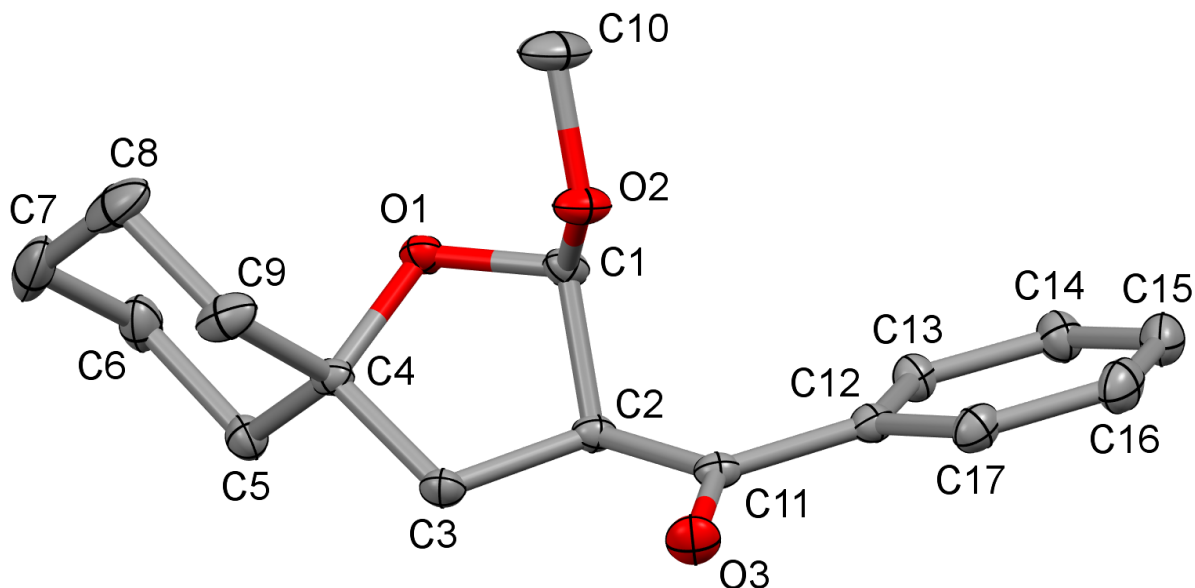

**Figure S4.** Molecular structure of **24b**. Atomic displacement ellipsoids shown at the 50 % probability level. H atoms are omitted for clarity.

**X-ray Crystal Structure Analysis of 24b:**  $C_{17}H_{22}O_3$ ,  $M_r = 274.34 \text{ g} \cdot \text{mol}^{-1}$ , colourless prism, crystal size  $0.11 \times 0.12 \times 0.32 \text{ mm}^3$ , monoclinic, space group  $P2_1/n$  [14],  $a = 12.5303(15) \text{ \AA}$ ,  $b = 5.8923(5) \text{ \AA}$ ,  $c = 20.003(3) \text{ \AA}$ ,  $\beta = 91.647(10)^\circ$ ,  $V = 1476.3(3) \text{ \AA}^3$ ,  $T = 100(2) \text{ K}$ ,  $Z = 4$ ,  $D_{calc} = 1.234 \text{ g} \cdot \text{cm}^3$ ,  $\lambda = 0.71073 \text{ \AA}$ ,  $\mu(Mo-K\alpha) = 0.083 \text{ mm}^{-1}$ , face-indexed absorption correction (SADABS,  $T_{min} = 0.98109$ ,  $T_{max} = 0.99299$ ), Bruker-AXS Mach3 diffractometer with Kappa-CCD detector and FR591 molybdenum rotating anode X-ray source equipped with Incoatec Helios X-ray optics,  $3.253 < \theta < 33.152^\circ$ , 31477 measured reflections, 5619 independent reflections, 4315 reflections with  $I > 2\sigma(I)$ ,  $R_{int} = 0.0407$ , 99.8 % coverage with an average redundancy of 5.42 to  $0.65 \text{ \AA}$  resolution.

## INTENSITY STATISTICS FOR DATASET

| Resolution  | #Data | #Theory | %Complete | Redundancy | Mean I | Mean I/s | Rmerge | Rsigma |
|-------------|-------|---------|-----------|------------|--------|----------|--------|--------|
| Inf - 2.76  | 93    | 101     | 92.1      | 8.96       | 138.82 | 74.36    | 0.0271 | 0.0116 |
| 2.76 - 1.82 | 217   | 217     | 100.0     | 8.15       | 63.12  | 63.03    | 0.0251 | 0.0116 |
| 1.82 - 1.43 | 304   | 305     | 99.7      | 7.44       | 28.12  | 50.39    | 0.0254 | 0.0138 |
| 1.43 - 1.25 | 299   | 299     | 100.0     | 7.31       | 20.36  | 43.97    | 0.0297 | 0.0155 |
| 1.25 - 1.13 | 308   | 308     | 100.0     | 6.70       | 19.13  | 35.60    | 0.0299 | 0.0179 |
| 1.13 - 1.04 | 330   | 330     | 100.0     | 6.58       | 17.42  | 34.76    | 0.0299 | 0.0190 |
| 1.04 - 0.98 | 283   | 283     | 100.0     | 6.26       | 8.68   | 23.84    | 0.0456 | 0.0291 |
| 0.98 - 0.93 | 315   | 316     | 99.7      | 5.72       | 8.02   | 20.91    | 0.0498 | 0.0325 |
| 0.93 - 0.89 | 292   | 292     | 100.0     | 5.76       | 5.55   | 16.85    | 0.0696 | 0.0430 |
| 0.89 - 0.85 | 341   | 341     | 100.0     | 5.56       | 5.10   | 14.28    | 0.0741 | 0.0479 |
| 0.85 - 0.82 | 313   | 313     | 100.0     | 5.04       | 4.41   | 12.26    | 0.0816 | 0.0607 |
| 0.82 - 0.79 | 358   | 358     | 100.0     | 4.91       | 4.20   | 11.62    | 0.0897 | 0.0653 |
| 0.79 - 0.77 | 253   | 253     | 100.0     | 4.77       | 4.27   | 10.98    | 0.0944 | 0.0679 |
| 0.77 - 0.75 | 294   | 294     | 100.0     | 4.70       | 4.23   | 10.33    | 0.1068 | 0.0731 |
| 0.75 - 0.73 | 324   | 324     | 100.0     | 4.46       | 4.27   | 10.09    | 0.1091 | 0.0797 |
| 0.73 - 0.71 | 394   | 394     | 100.0     | 4.26       | 3.76   | 8.92     | 0.1171 | 0.0987 |
| 0.71 - 0.70 | 190   | 190     | 100.0     | 4.04       | 2.93   | 6.72     | 0.1516 | 0.1391 |
| 0.70 - 0.68 | 447   | 447     | 100.0     | 4.09       | 3.07   | 6.52     | 0.1589 | 0.1457 |
| 0.68 - 0.67 | 219   | 219     | 100.0     | 4.08       | 2.66   | 4.92     | 0.1729 | 0.1892 |
| 0.67 - 0.66 | 232   | 232     | 100.0     | 3.88       | 2.41   | 4.27     | 0.2051 | 0.2365 |
| 0.66 - 0.65 | 279   | 282     | 98.9      | 3.85       | 2.41   | 4.01     | 0.2166 | 0.2542 |
| -----       |       |         |           |            |        |          |        |        |
| 0.75 - 0.65 | 2085  | 2088    | 99.9      | 4.12       | 3.17   | 6.79     | 0.1476 | 0.1434 |
| Inf - 0.65  | 6085  | 6098    | 99.8      | 5.42       | 12.00  | 20.15    | 0.0401 | 0.0320 |
| -----       |       |         |           |            |        |          |        |        |

The structure was solved by *SHELXT* and refined by full-matrix least-squares (*SHELXL*) against  $F^2$  using aspherical atomic scattering factors [J. Lübben *et al.*, *Acta Cryst.* **2019**, *A75*, 50-62]. The hydrogen atoms were refined using a riding model. Refinement of the structure resulted in  $R1 = 0.0383$  for 4315 [ $I > 2\sigma(I)$ ] and 0.0583 for all 5619 data, 185 parameters refined,  $wR2 = 0.0965$ ,  $Goof = S = 1.039$ , residual electron density +0.21 (0.71 Å from C1) / -0.21 (0.80 Å from C14) e · Å<sup>-3</sup>. **CCDC-2016742**.

### Single Crystal Structure Analysis of 38

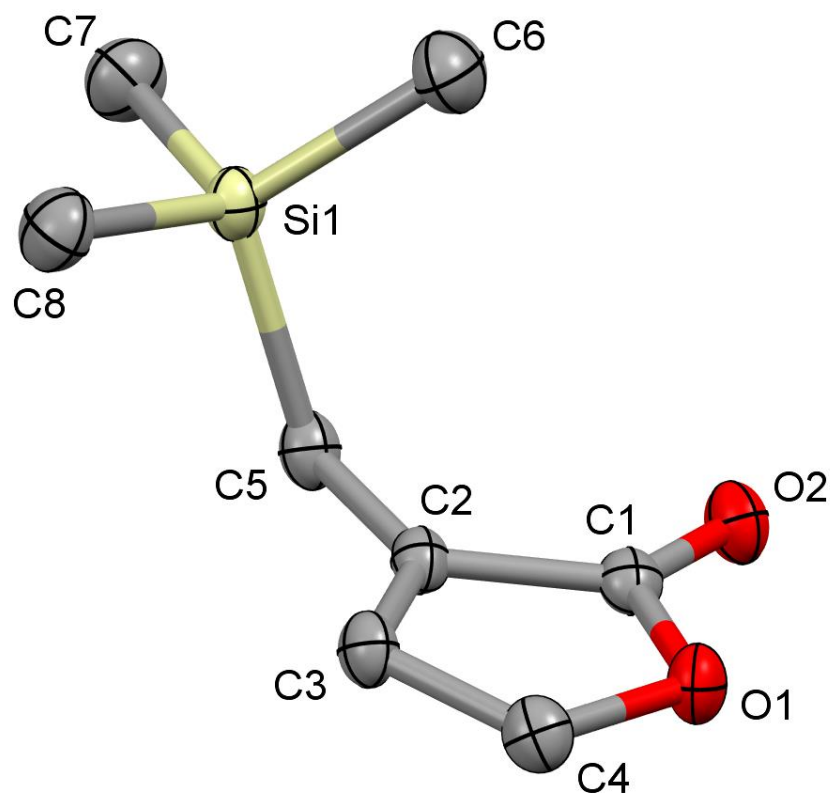

**Figure S5.** Molecular structure of **38**. Atomic displacement ellipsoids shown at the 50 % probability level. H atoms are omitted for clarity.

**X-ray Crystal Structure Analysis of 38:**  $C_8H_{14}O_2Si$ ,  $M_r = 170.28 \text{ g} \cdot \text{mol}^{-1}$ , colourless plate, crystal size  $0.010 \times 0.145 \times 0.330 \text{ mm}^3$ , monoclinic, space group  $P2_1/c$  [14],  $a = 13.8465(6) \text{ \AA}$ ,  $b = 6.4641(3) \text{ \AA}$ ,  $c = 11.3247(5) \text{ \AA}$ ,  $\beta = 107.264(2)^\circ$ ,  $V = 967.95(8) \text{ \AA}^3$ ,  $T = 100(2) \text{ K}$ ,  $Z = 4$ ,  $D_{calc} = 1.168 \text{ g} \cdot \text{cm}^3$ ,  $\lambda = 1.54178 \text{ \AA}$ ,  $\mu(Cu-K\alpha) = 1.78 \text{ mm}^{-1}$ , face-indexed absorption correction (*SADABS*,  $T_{min} = 0.72475$ ,  $T_{max} = 0.98217$ ), Bruker-AXS Mach3 diffractometer with Apex II detector and FR591 copper rotating anode X-ray source equipped with Montel X-ray optics,  $3.342 < \theta < 63.198^\circ$ , 17601 measured reflections, 1560 independent reflections, 1407 reflections with  $I > 2\sigma(I)$ ,  $R_{int} = 0.0552$ , 98.9 % coverage with an average redundancy of 10.66 to  $0.86 \text{ \AA}$  resolution.



## INTENSITY STATISTICS FOR DATASET

| Resolution  | #Data | #Theory | %Complete | Redundancy | Mean I | Mean I/s | Rmerge | Rsigma |
|-------------|-------|---------|-----------|------------|--------|----------|--------|--------|
| Inf - 3.73  | 26    | 27      | 96.3      | 8.07       | 149.36 | 31.43    | 0.0303 | 0.0224 |
| 3.73 - 2.49 | 60    | 60      | 100.0     | 9.88       | 90.47  | 35.82    | 0.0327 | 0.0230 |
| 2.49 - 1.94 | 86    | 86      | 100.0     | 8.06       | 44.85  | 29.65    | 0.0380 | 0.0251 |
| 1.94 - 1.67 | 87    | 87      | 100.0     | 9.78       | 41.43  | 31.51    | 0.0580 | 0.0230 |
| 1.67 - 1.51 | 91    | 91      | 100.0     | 9.42       | 39.00  | 32.06    | 0.0476 | 0.0227 |
| 1.51 - 1.40 | 82    | 82      | 100.0     | 8.61       | 24.42  | 26.37    | 0.0483 | 0.0270 |
| 1.40 - 1.31 | 88    | 88      | 100.0     | 7.56       | 20.95  | 23.06    | 0.0605 | 0.0293 |
| 1.31 - 1.24 | 91    | 91      | 100.0     | 8.10       | 22.18  | 25.33    | 0.0598 | 0.0331 |
| 1.24 - 1.19 | 72    | 72      | 100.0     | 16.74      | 18.31  | 32.04    | 0.0644 | 0.0211 |
| 1.19 - 1.14 | 94    | 94      | 100.0     | 16.46      | 15.89  | 33.72    | 0.0674 | 0.0218 |
| 1.14 - 1.10 | 82    | 82      | 100.0     | 15.38      | 15.63  | 30.53    | 0.0627 | 0.0237 |
| 1.10 - 1.06 | 100   | 100     | 100.0     | 15.21      | 12.00  | 27.81    | 0.0712 | 0.0255 |
| 1.06 - 1.03 | 82    | 82      | 100.0     | 14.84      | 10.51  | 24.34    | 0.0714 | 0.0274 |
| 1.03 - 1.00 | 95    | 95      | 100.0     | 12.82      | 12.20  | 25.29    | 0.0686 | 0.0289 |
| 1.00 - 0.98 | 72    | 72      | 100.0     | 10.14      | 7.44   | 19.19    | 0.0906 | 0.0399 |
| 0.98 - 0.95 | 103   | 103     | 100.0     | 10.20      | 9.73   | 21.18    | 0.0726 | 0.0336 |
| 0.95 - 0.93 | 76    | 81      | 93.8      | 8.96       | 8.58   | 19.15    | 0.0889 | 0.0377 |
| 0.93 - 0.91 | 93    | 94      | 98.9      | 8.73       | 7.51   | 18.29    | 0.0928 | 0.0407 |
| 0.91 - 0.90 | 55    | 56      | 98.2      | 9.04       | 6.27   | 17.86    | 0.1038 | 0.0425 |
| 0.90 - 0.88 | 100   | 101     | 99.0      | 8.56       | 7.07   | 18.09    | 0.0941 | 0.0401 |
| 0.88 - 0.86 | 80    | 90      | 88.9      | 5.51       | 6.96   | 15.38    | 0.1092 | 0.0537 |
| -----       |       |         |           |            |        |          |        |        |
| 0.96 - 0.86 | 441   | 459     | 96.1      | 8.27       | 7.70   | 18.27    | 0.0903 | 0.0410 |
| Inf - 0.86  | 1715  | 1734    | 98.9      | 10.66      | 22.16  | 25.41    | 0.0549 | 0.0265 |
| -----       |       |         |           |            |        |          |        |        |

The structure was solved by *SHELXT* and refined by full-matrix least-squares (*SHELXL*) against  $F^2$ . The hydrogen atoms were refined using a riding model. Refinement of the structure resulted in  $R1 = 0.0322$  for 1407 [ $I > 2\sigma(I)$ ] and 0.0368 for all 1560 data, 103 parameters refined,  $wR2 = 0.0863$ ,  $GooF = S = 1.046$ , residual electron density +0.27 (0.93 Å from C5) / -0.28 (0.92 Å from Si1)  $e \cdot \text{Å}^{-3}$ . **CCDC-2016743**.

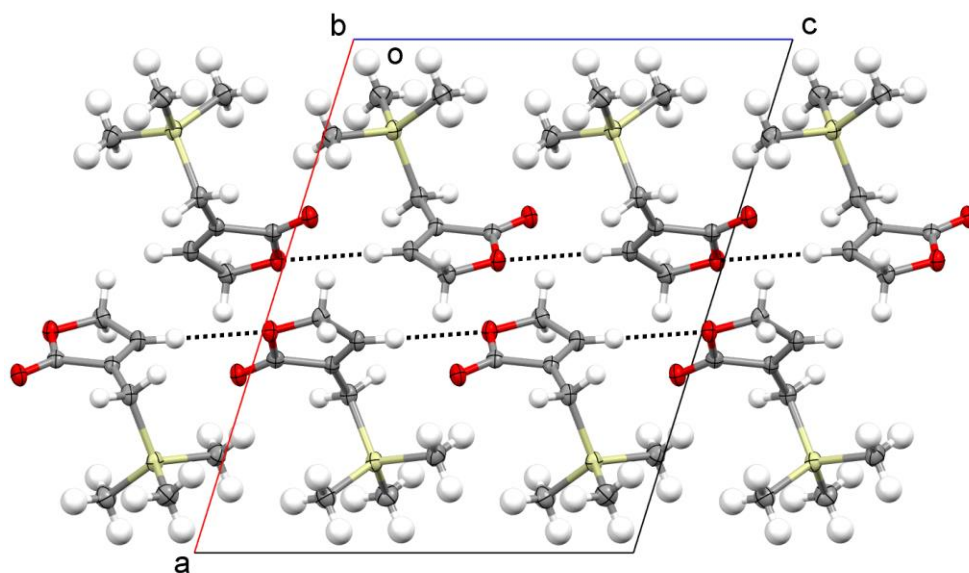

**Figure S6.** Molecular packing of **38**, showing the shortest C-H...O intermolecular distances.

### Single Crystal Structure Analysis of **39**

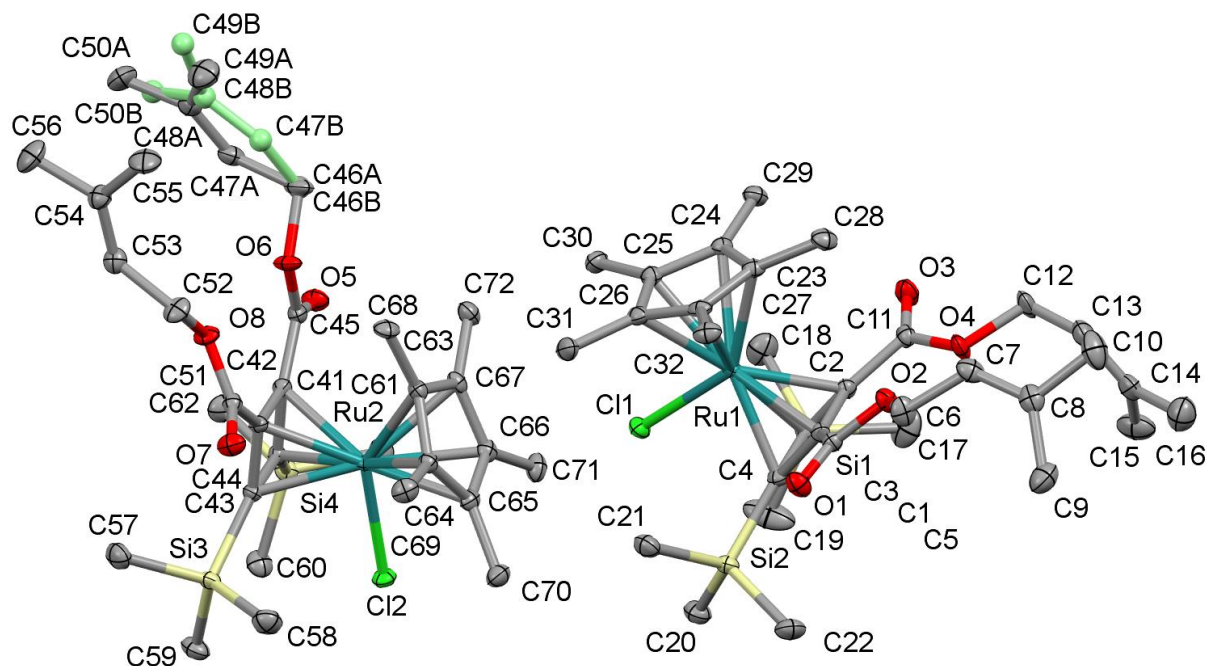

**Figure S7.** Molecular structure of the two independent molecules of **39**. Atomic displacement ellipsoids shown at the 50 % probability level. The partially disordered dimethyl propenyl group (ca. 12%) is shown in light green. H atoms are omitted for clarity.

**X-ray Crystal Structure Analysis of 39:** C<sub>32</sub>H<sub>51</sub>ClO<sub>4</sub>RuSi<sub>2</sub>,  $M_r = 692.42 \text{ g} \cdot \text{mol}^{-1}$ , orange-red prism, crystal size 0.031 x 0.037 x 0.060 mm<sup>3</sup>, triclinic, space group  $P-1[2]$ ,  $a = 10.5379(6) \text{ \AA}$ ,  $b = 15.7120(10) \text{ \AA}$ ,  $c = 20.9915(14) \text{ \AA}$ ,  $\alpha = 89.810(3)^\circ$ ,  $\beta = 89.849(3)^\circ$ ,  $\gamma = 84.937(3)^\circ$ ,  $V = 3462.0(4) \text{ \AA}^3$ ,  $T = 100(2) \text{ K}$ ,  $Z = 4$ ,  $D_{\text{calc}} = 1.328 \text{ g} \cdot \text{cm}^3$ ,  $\lambda = 0.71073 \text{ \AA}$ ,  $\mu(\text{Mo-K}\alpha) = 0.632 \text{ mm}^{-1}$ , face-indexed absorption correction (*SADABS*,  $T_{\text{min}} = 0.96950$ ,  $T_{\text{max}} = 0.98790$ ), Bruker-AXS Mach3 diffractometer with Kappa-CCD detector and FR591 molybdenum rotating anode X-ray source equipped with Incoatec Helios X-ray optics,  $0.970 < \theta < 30.998^\circ$ , 115799 measured reflections, 22052 independent reflections, 15513 reflections with  $I > 2\sigma(I)$ ,  $R_{\text{int}} = 0.0765$ , 98.8 % coverage with an average redundancy of 5.02 to 0.67  $\text{\AA}$  resolution.

INTENSITY STATISTICS FOR DATASET

| Resolution  | #Data | #Theory | %Complete | Redundancy | Mean I | Mean I/s | Rmerge | Rsigma |
|-------------|-------|---------|-----------|------------|--------|----------|--------|--------|
| Inf - 2.73  | 354   | 354     | 100.0     | 9.34       | 74.37  | 47.89    | 0.0307 | 0.0139 |
| 2.73 - 1.83 | 828   | 828     | 100.0     | 9.44       | 45.27  | 40.62    | 0.0367 | 0.0172 |
| 1.83 - 1.45 | 1199  | 1199    | 100.0     | 9.34       | 37.10  | 34.90    | 0.0405 | 0.0200 |
| 1.45 - 1.27 | 1177  | 1177    | 100.0     | 9.25       | 20.81  | 25.31    | 0.0589 | 0.0282 |
| 1.27 - 1.15 | 1200  | 1200    | 100.0     | 8.86       | 19.22  | 21.34    | 0.0682 | 0.0321 |
| 1.15 - 1.07 | 1160  | 1160    | 100.0     | 7.79       | 17.79  | 18.46    | 0.0849 | 0.0395 |
| 1.07 - 1.00 | 1344  | 1344    | 100.0     | 5.95       | 16.33  | 14.43    | 0.0884 | 0.0509 |
| 1.00 - 0.95 | 1194  | 1194    | 100.0     | 5.02       | 14.05  | 11.81    | 0.1003 | 0.0646 |
| 0.95 - 0.91 | 1164  | 1164    | 100.0     | 4.51       | 11.65  | 9.42     | 0.1122 | 0.0794 |
| 0.91 - 0.88 | 1009  | 1009    | 100.0     | 4.16       | 9.74   | 7.91     | 0.1279 | 0.0980 |
| 0.88 - 0.85 | 1191  | 1191    | 100.0     | 3.93       | 9.66   | 7.47     | 0.1306 | 0.1030 |
| 0.85 - 0.82 | 1317  | 1317    | 100.0     | 3.80       | 8.45   | 6.50     | 0.1507 | 0.1222 |
| 0.82 - 0.80 | 1026  | 1026    | 100.0     | 3.66       | 7.64   | 5.70     | 0.1674 | 0.1393 |
| 0.80 - 0.77 | 1745  | 1745    | 100.0     | 3.55       | 6.73   | 4.98     | 0.1920 | 0.1625 |
| 0.77 - 0.76 | 591   | 591     | 100.0     | 3.41       | 6.71   | 4.77     | 0.2091 | 0.1753 |
| 0.76 - 0.74 | 1409  | 1409    | 100.0     | 3.37       | 6.38   | 4.50     | 0.2120 | 0.1863 |
| 0.74 - 0.72 | 1531  | 1538    | 99.5      | 3.25       | 5.26   | 3.76     | 0.2485 | 0.2305 |
| 0.72 - 0.71 | 800   | 802     | 99.8      | 3.16       | 4.93   | 3.39     | 0.2755 | 0.2586 |
| 0.71 - 0.69 | 1813  | 1825    | 99.3      | 3.05       | 4.75   | 3.18     | 0.2898 | 0.2745 |
| 0.69 - 0.68 | 985   | 990     | 99.5      | 2.84       | 3.87   | 2.51     | 0.3355 | 0.3661 |
| 0.68 - 0.67 | 491   | 744     | 66.0      | 1.27       | 3.68   | 1.81     | 0.3626 | 0.5065 |
| -----       |       |         |           |            |        |          |        |        |
| 0.77 - 0.67 | 7620  | 7899    | 96.5      | 2.99       | 5.14   | 3.51     | 0.2573 | 0.2532 |
| Inf - 0.67  | 23528 | 23807   | 98.8      | 5.02       | 13.60  | 11.92    | 0.0758 | 0.0745 |
| -----       |       |         |           |            |        |          |        |        |

The structure was solved by *SHELXT* and refined by full-matrix least-squares (*SHELXL*) against  $F^2$ . One of the dimethylpropenyl groups is slightly disordered [0.879(6):0.121(6)]. The positions of C46A and C46B were constrained to be equal in order to avoid high correlations in the refinement. The isotropic atomic displacement parameters of the C atoms of the minor component were constrained to be equal. The hydrogen atoms were refined using a riding model. Refinement of the structure resulted in  $R1 = 0.046$  for 15513 [ $I > 2\sigma(I)$ ] and 0.0792 for all 22052 data, 767

parameters refined,  $wR2 = 0.1147$ ,  $Goof = S = 1.013$ , residual electron density  $+1.16$  ( $1.1 \text{ \AA}$  from Ru2) /  $-1.41$  ( $0.68 \text{ \AA}$  from Ru1)  $e \cdot \text{\AA}^{-3}$ . **CCDC-2016744**.

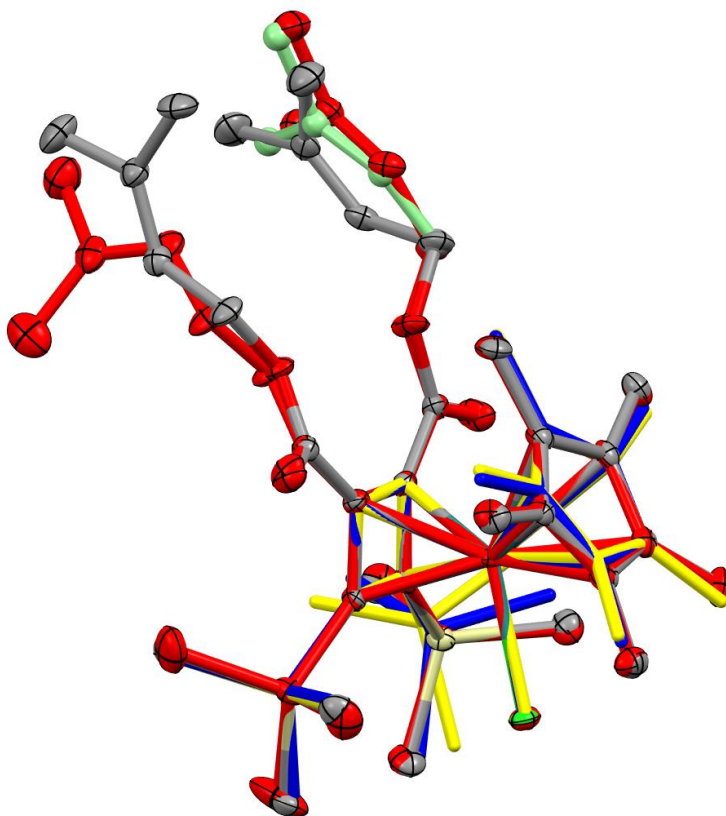

**Figure S8.** Superposition of the  $C_4RuCl$  units of the two independent molecules of **39** (atom colouring and red) and the two independent molecules of chloro-( $\eta^5$ -pentamethylcyclopentadienyl)-( $\eta^4$ -1,2-bis(trimethylsilyl)cyclobuta-2,4-diene)-ruthenium(II) with the CSD refcode VEBQOI (blue and yellow). The partially disordered dimethyl propenyl group is shown in light green. H atoms are omitted for clarity.

## Single Crystal Structure Analysis of **41**

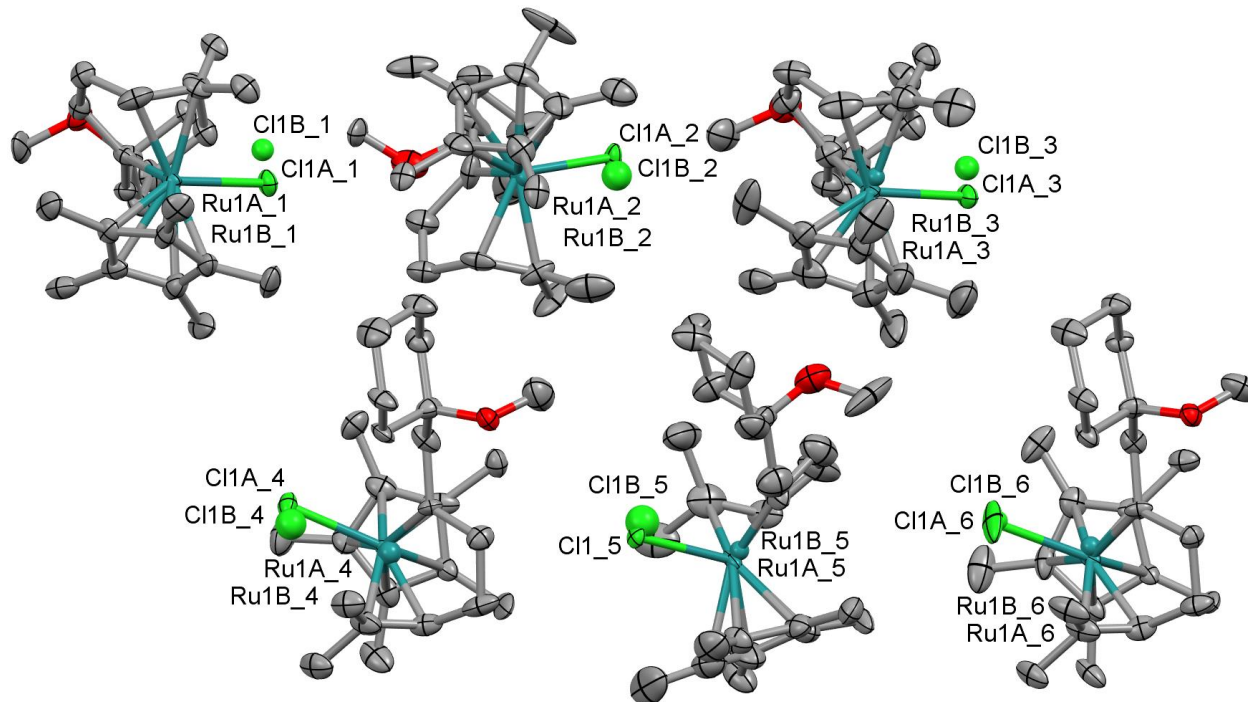

**Figure S9.** Molecular structure of the six independent molecules of **41**. Atomic displacement ellipsoids shown at the 50 % probability level. Partially disordered Ru and Cl atoms shown with the suffix A and B. H atoms are omitted for clarity.

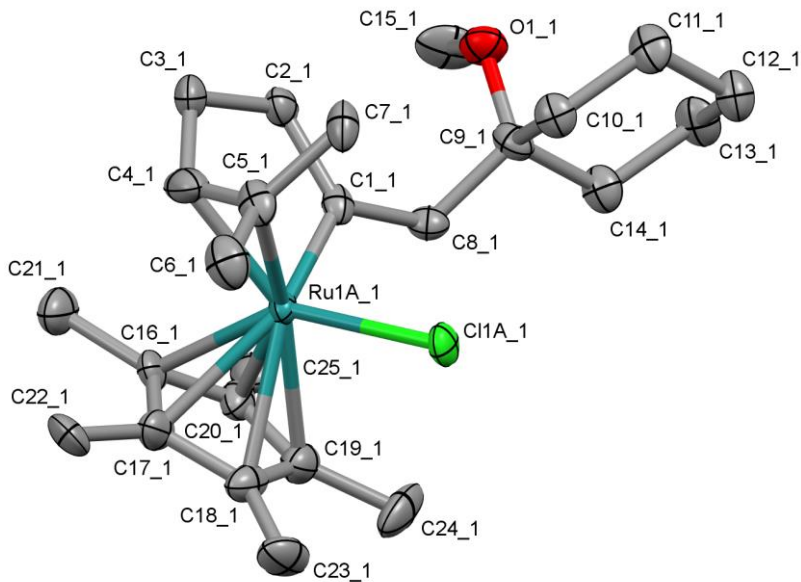

**Figure S10.** Molecular structure of the one of the independent molecules of **41**. Atomic displacement ellipsoids shown at the 50 % probability level. H atoms are omitted for clarity.

Selected average distances (Å) and angles (°) over all major components: Ru1A-C11A 2.44(2), Ru1A-C1 1.90(4), Ru1A-C4 2.17(4), Ru1A-C5 2.22(5), C1-C2 1.53(3), C2-C3 1.55(5), C3-C4 1.52(4), C4-C5 1.39(4), C5-C6 1.56(5), C5-C7 1.54(1), C1-C8 1.47(3), C8-C9 1.55(2), C8-C1-C2 117(2), C1-C2-C3 113(1), C2-C3-C4 109(1), C3-C4-C5 125(1), C1-Ru1A-C11A 95(1), C1-Ru1A-C4/5 86(2), C1-Ru1A-Cp 122(3), C4/5-Ru1A-Cp 129(1), C11A-Ru1A-Cp 114(1). Cp is the midpoint of C16 - C20; C4/5 is the midpoint between C4 and C5.

**X-ray Crystal Structure Analysis of 41:** C<sub>25</sub>H<sub>41</sub>ClO Ru,  $M_r = 494.10 \text{ g} \cdot \text{mol}^{-1}$ , red prism, crystal size 0.10 x 0.14 x 0.16 mm<sup>3</sup>, monoclinic, space group *Pn* [7],  $a = 19.802(3) \text{ Å}$ ,  $b = 16.260(2) \text{ Å}$ ,  $c = 23.261(2) \text{ Å}$ ,  $\beta = 107.910(8)^\circ$ ,  $V = 7126.5(16) \text{ Å}^3$ ,  $T = 100(2) \text{ K}$ ,  $Z = 12$ ,  $D_{\text{calc}} = 1.382 \text{ g} \cdot \text{cm}^{-3}$ ,  $\lambda = 0.71073 \text{ Å}$ ,  $\mu(\text{Mo-K}\alpha) = 0.785 \text{ mm}^{-1}$ , face-indexed absorption correction (*SADABS*,  $T_{\text{min}} = 0.83421$ ,  $T_{\text{max}} = 0.90734$ ), Bruker-AXS Mach3 diffractometer with Kappa-CCD detector and FR591 molybdenum rotating anode X-ray source equipped with Incoatec Helios X-ray optics,  $3.721 < \theta < 32.030^\circ$ , 222409 measured reflections, 48407 independent reflections, 34434 reflections with  $I > 2\sigma(I)$ ,  $R_{\text{int}} = 0.0647$ , 99.7 % coverage with an average redundancy of 8.55 to 0.65 Å resolution.

INTENSITY STATISTICS FOR DATASET

| Resolution  | #Data | #Theory | %Complete | Redundancy | Mean I | Mean I/s | Rmerge | Rsigma |
|-------------|-------|---------|-----------|------------|--------|----------|--------|--------|
| Inf - 2.66  | 421   | 450     | 93.6      | 10.77      | 53.24  | 41.24    | 0.0410 | 0.0143 |
| 2.66 - 1.78 | 979   | 981     | 99.8      | 12.53      | 42.85  | 40.89    | 0.0375 | 0.0133 |
| 1.78 - 1.41 | 1410  | 1410    | 100.0     | 12.88      | 24.38  | 38.75    | 0.0409 | 0.0149 |
| 1.41 - 1.23 | 1396  | 1396    | 100.0     | 12.33      | 14.28  | 31.27    | 0.0470 | 0.0190 |
| 1.23 - 1.11 | 1505  | 1505    | 100.0     | 11.45      | 11.54  | 26.46    | 0.0559 | 0.0235 |
| 1.11 - 1.03 | 1418  | 1418    | 100.0     | 10.74      | 10.74  | 23.70    | 0.0615 | 0.0268 |
| 1.03 - 0.97 | 1394  | 1394    | 100.0     | 10.09      | 7.99   | 20.18    | 0.0725 | 0.0339 |
| 0.97 - 0.92 | 1450  | 1450    | 100.0     | 9.46       | 6.33   | 16.46    | 0.0881 | 0.0426 |
| 0.92 - 0.88 | 1409  | 1409    | 100.0     | 9.04       | 4.99   | 14.08    | 0.1041 | 0.0540 |
| 0.88 - 0.85 | 1214  | 1215    | 99.9      | 8.60       | 4.05   | 11.74    | 0.1285 | 0.0674 |
| 0.85 - 0.82 | 1424  | 1425    | 99.9      | 8.12       | 3.97   | 10.69    | 0.1387 | 0.0751 |
| 0.82 - 0.79 | 1656  | 1657    | 99.9      | 7.81       | 3.55   | 9.23     | 0.1548 | 0.0877 |
| 0.79 - 0.77 | 1224  | 1224    | 100.0     | 7.49       | 3.18   | 8.00     | 0.1757 | 0.1017 |
| 0.77 - 0.75 | 1376  | 1377    | 99.9      | 7.08       | 2.99   | 7.18     | 0.1937 | 0.1140 |
| 0.75 - 0.73 | 1517  | 1521    | 99.7      | 6.76       | 2.45   | 6.07     | 0.2314 | 0.1444 |
| 0.73 - 0.71 | 1686  | 1688    | 99.9      | 6.64       | 2.27   | 5.55     | 0.2483 | 0.1619 |
| 0.71 - 0.70 | 955   | 955     | 100.0     | 6.39       | 1.96   | 4.57     | 0.2766 | 0.1940 |
| 0.70 - 0.68 | 2006  | 2009    | 99.9      | 6.21       | 1.80   | 4.13     | 0.3128 | 0.2183 |
| 0.68 - 0.67 | 1113  | 1113    | 100.0     | 6.03       | 1.54   | 3.49     | 0.3584 | 0.2641 |
| 0.67 - 0.66 | 1154  | 1156    | 99.8      | 5.88       | 1.36   | 3.07     | 0.3852 | 0.3041 |
| 0.66 - 0.65 | 1291  | 1339    | 96.4      | 5.50       | 1.09   | 2.42     | 0.4667 | 0.3950 |
| -----       |       |         |           |            |        |          |        |        |
| 0.75 - 0.65 | 9722  | 9781    | 99.4      | 6.23       | 1.82   | 4.30     | 0.2978 | 0.2142 |
| Inf - 0.65  | 27998 | 28092   | 99.7      | 8.55       | 7.89   | 14.54    | 0.0697 | 0.0438 |
| -----       |       |         |           |            |        |          |        |        |

The crystal structure appears to be best described as  $Pn$ . There appears to be an additional slight modulation of the structure along the  $c$  unit cell axis whereby the molecules are partially replaced by their enantiomers. This results in higher than expected residual electron density close to all the ruthenium and chlorine atoms and significantly less residual density elsewhere corresponding to the lighter atoms. Two crystals from the same batch were investigated and both showed a similar effect. The data set for which the shadowing was less pronounced was selected for analysis. Nevertheless, some residual electron density remains, especially close to the ruthenium atoms. The structure was solved by *SHELXT* and refined as a partial inversion twin [BASF 0.27(5)] by full-matrix least-squares (*SHELXL*) against  $F^2$ . The hydrogen atoms on the five methyl groups on the pentamethylcyclopentadienyl ligands were refined using a riding model that maximizes the sum of the difference densities at the three hydrogen positions on each methyl group followed by refinement of the torsion angle (AFIX 137), and resulted in a short intramolecular H...H distance of ca. 1.7 Å. The positions of the hydrogen atoms on the methyl groups cannot be completely relied upon owing to residual electron density resulting from the disordered components. A number of diffraction intensities were shadowed by the beamstop ( $> 5.5$  Å) and removed from the dataset before the final refinement cycles. Refinement of the structure with partially disordered ruthenium and chlorine atoms (ca. 8 - 34 %) resulted in  $R1 = 0.0809$  for 34434 [ $I > 2\sigma(I)$ ] and 0.1196 for all 48407 data, 1616 parameters refined, using 1010 restraints (ISOR 0.01),  $wR2 = 0.2286$ ,  $Goof = S$

$= 1.061$ , residual electron density  $+3.38$  ( $0.19$  Å from Ru1B\_5) /  $-1.45$  ( $0.90$  Å from Ru1A\_4)  $e \cdot \text{Å}^{-3}$ .  
**CCDC-1994299.**

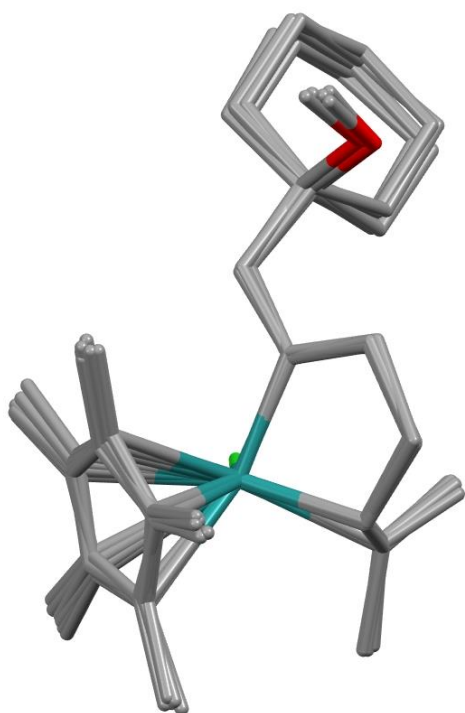

**Figure S11.** Superposition of Ru1A, C11A, C1 and C4 of the six independent molecules or their enantiomers in the asymmetric unit of **41**, showing the similarity between the different conformations in the crystal.

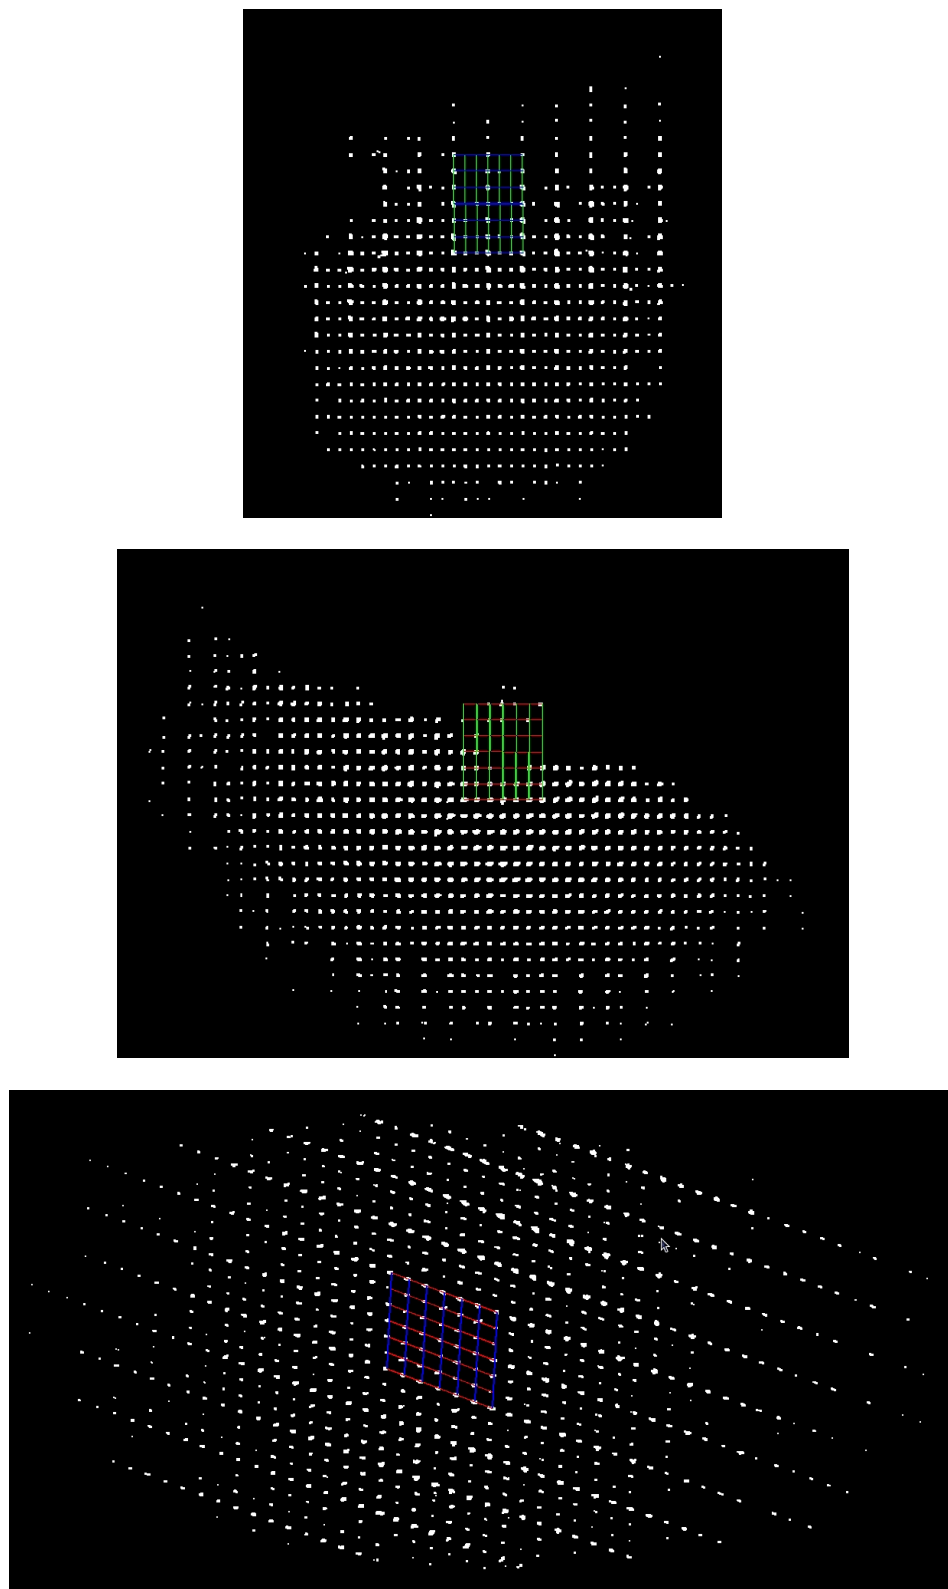

**Figure S12.** Reciprocal lattice representations along the  $a^*$ ,  $c^*$  and  $b/b^*$  directions of **41**, highlighting the systematically weaker reflections along the  $c^*$  axis (blue), consistent with replacement of molecules by their enantiomers as illustrated in Figure S9.



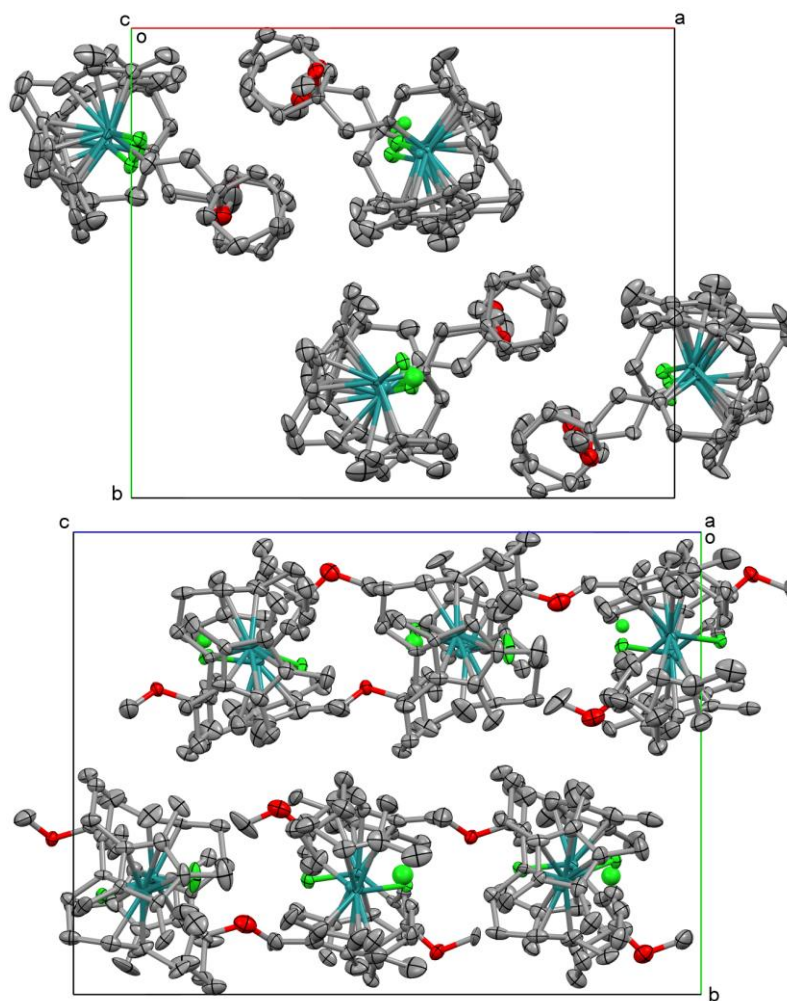

**Figure S13.** Packing of the molecules in the unit cell of **41**. There is a local inversion center at  $x = 0.248$ ,  $y = 0.243$ ,  $z = 0.381$ . Atomic displacement ellipsoids shown at the 50 % probability level. H atoms are omitted for clarity.

## HYDROGENATIVE CYCLOPROPANATION AND HYDROGENATIVE METATHESIS: SCOPE AND LIMITATIONS

**Table S1.** The substituents on the alkene determine the reaction outcome.<sup>a</sup>

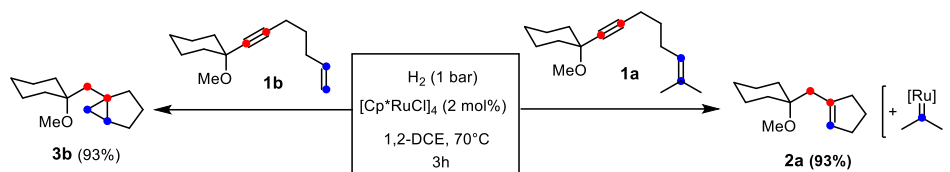

| Yield <sup>b</sup>                                                                     | R <sup>1</sup> = H | Substrate | R <sup>1</sup> = Me | Yield <sup>b</sup>                          |
|----------------------------------------------------------------------------------------|--------------------|-----------|---------------------|---------------------------------------------|
| 93%                                                                                    |                    |           |                     | R = Me, 93%<br>R = MOM, 80%<br>R = TBS, 69% |
| 78% <sup>c</sup>                                                                       |                    |           |                     | R = TBS, 76%<br>R = Me, 78%                 |
| 56% <sup>c</sup>                                                                       |                    |           |                     | 95%                                         |
| R = TBS, 91% <sup>d</sup><br>R = MOM, 79% <sup>d</sup><br>R = SEM, quant. <sup>d</sup> |                    |           |                     | 85%                                         |
| 77%                                                                                    |                    |           |                     | 59% <sup>e</sup>                            |

<sup>a</sup> Unless stated otherwise, all reactions were performed using [Cp\*RuCl]<sub>4</sub> (2 mol%) in 1,2-dichloroethane at 70°C under a hydrogen atmosphere (1 atm); <sup>b</sup> yield of analytically pure product; <sup>c</sup> at 90°C; <sup>d</sup> at RT; <sup>e</sup> using [Cp<sup>E</sup>Ru(MeCN)<sub>3</sub>]PF<sub>6</sub> (**19**, 10 mol%) in combination with *n*Bu<sub>4</sub>NCl (11 mol%) as the catalyst and a reaction time of 8 h; Cp<sup>E</sup> = 2,4-dimethylcyclopentadienylcarboxylic acid ethyl ester

**Table S2.** Further study on the correlation between alkene substitution and the reaction outcome (all reactions were performed using  $[\text{Cp}^*\text{RuCl}]_4$  (2 mol%) in 1,2-dichloroethane at 70°C for 3 h under a hydrogen atmosphere (1 atm)).

| Entry | Substrate | Product | Yield (%) <sup>[a]</sup> |
|-------|-----------|---------|--------------------------|
| 1     |           |         | 93                       |
| 2     |           |         | 91                       |
| 3     |           |         | 49 <sup>[b]</sup>        |
| 4     |           |         | 40                       |
| 5     |           |         | 60                       |
| 6     |           |         | 93 <sup>[c]</sup>        |
| 7     |           | ---     | n. r.                    |
| 8     |           |         | 33 <sup>[d]</sup>        |
| 9     |           |         | 93 <sup>[c]</sup>        |

<sup>[a]</sup> NMR yield, unless stated otherwise; <sup>[b]</sup> competing enyne cycloisomerization via oxidative metallacycle formation was observed, see Table S3, entry 5; <sup>[c]</sup> yield of isolated pure material; <sup>[d]</sup> complex mixture; n. r. = no reaction

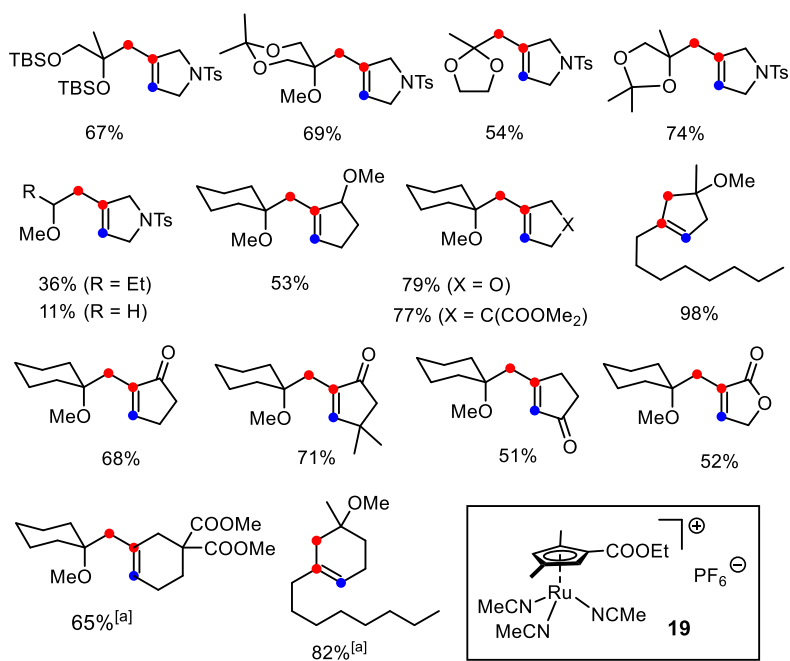

**Chart S1.** Products formed by "hydrogenative metathesis" of enyne derivatives comprising a 1,1-dimethylated olefin; the color code is analogous to that used in Table S1; unless stated otherwise, the reactions were performed with [Cp\**Ru*Cl]<sub>4</sub> (2 mol%) under H<sub>2</sub> atmosphere (1 atm) in 1,2-dichloroethane at 70°C for 3 h; [a] the reaction was performed with complex **19** (10 mol%) in combination with *n*Bu<sub>4</sub>NCl (11 mol%) and a reaction time of 8 h

## Limitations

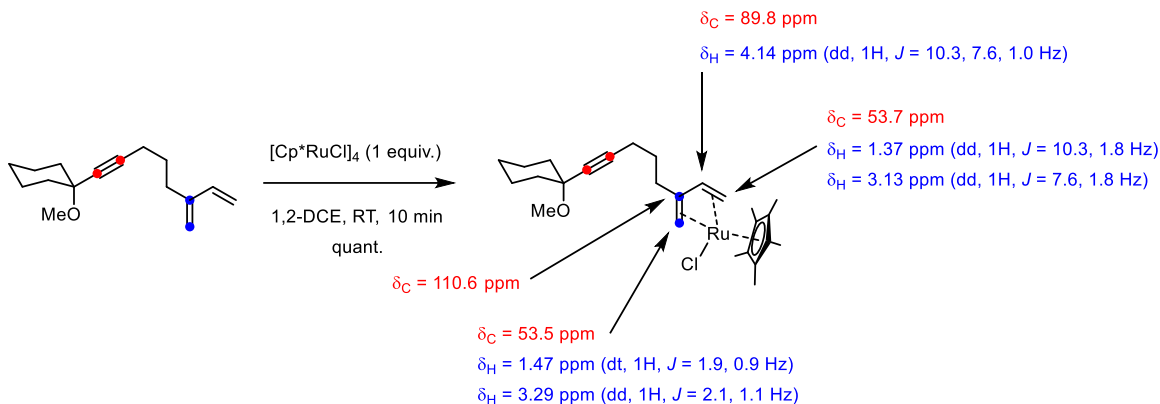

**Scheme S1.** Representative example for the competitive formation of a stable  $\pi$ -complex

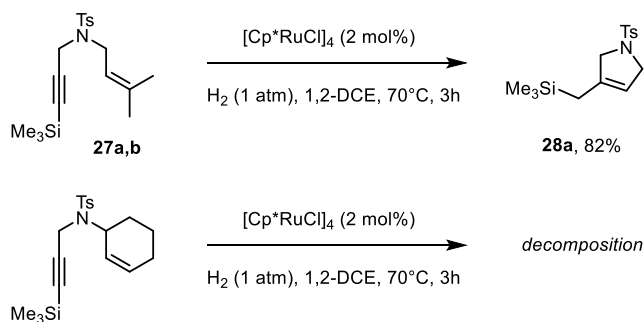

**Scheme S2.** Substrates comprising a cycloalkene unit tend to give complex mixtures: note that the secondary carbene formed upon metathesis is tethered to the product.

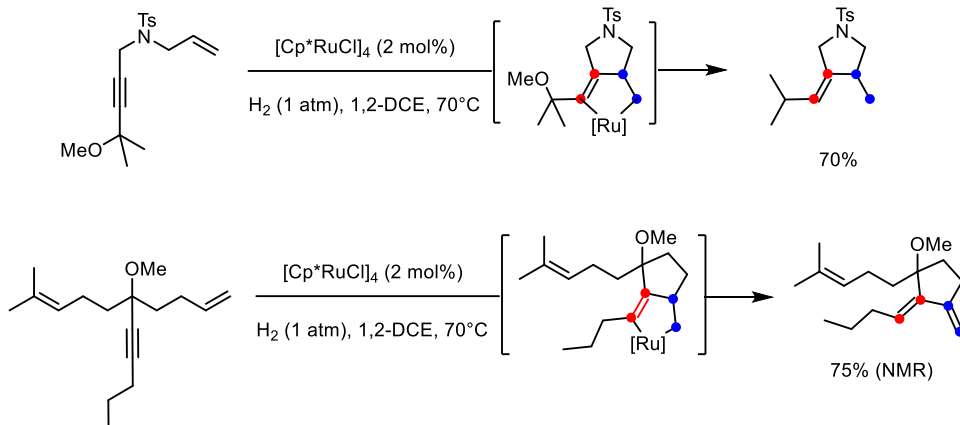

**Scheme S3.** Competing enyne cycloisomerization with (top) or without (bottom) subsequent hydrogenative cleavage of the transient metallacycle formed by oxidative cyclization; bottom: the competition experiment shows that the terminal alkene reacts preferentially, as expected.

**Table S3.** Side reactions under standard conditions ((Cp\*RuCl)<sub>4</sub> cat., H<sub>2</sub>, 1,2-DCE, 70 °C, 3 h).

| entry | substrate | identified side products | comment                                  |
|-------|-----------|--------------------------|------------------------------------------|
| 1     |           |                          | allylic substitution/<br>decarboxylation |
| 2     |           |                          | oxidative cyclization/<br>hydrogenation  |
| 3     |           |                          | oxidative cyclization                    |
| 4     |           |                          | oxidative cyclization/<br>hydrogenation  |
| 5     |           |                          | oxidative cyclization                    |
| 6     |           |                          | hydrogenative<br>metathesis              |
|       |           |                          | <i>trans</i> -hydrogenation              |
|       |           |                          | enyne addition/<br>isomerization         |

## GENERAL INFORMATION

Unless stated otherwise, all reactions were carried out under argon atmosphere in flame dried Schlenk glassware. The solvents were purified by distillation over the indicated drying agents under argon: THF, Et<sub>2</sub>O (Mg/anthracene), hexanes (Na/K), EtOH, MeOH (Mg), 1,2-dichloroethane, CD<sub>2</sub>Cl<sub>2</sub>, EtOAc, THP (CaH<sub>2</sub>), 2-butanone (B<sub>2</sub>O<sub>3</sub>). DMF, MeCN and Et<sub>3</sub>N were dried by an absorption solvent purification system based on molecular sieves. 1,2-Dichloroethane, CD<sub>2</sub>Cl<sub>2</sub>, THP and 2-butanone were degassed via freeze-pump-thaw procedure (3 x) and stored over molecular sieves (except 2-butanone). Flash chromatography: Merck Geduran silica gel 60 (40 – 63 μm). TLCs were stained with KMnO<sub>4</sub>, anisaldehyde, or molybdato-phosphoric acid (5% in EtOH).

NMR spectra were recorded on Bruker DPX 300, AMX 300, AV 400 or AV III 600 spectrometers in the solvents indicated; chemical shifts (δ) are given in ppm relative to TMS, coupling constants (*J*) in Hz. The solvent signals were used as references and the chemical shifts converted to the TMS scale (CDCl<sub>3</sub>: δ<sub>C</sub> = 77.16 ppm; residual CHCl<sub>3</sub>: δ<sub>H</sub> = 7.26 ppm; CD<sub>2</sub>Cl<sub>2</sub>: δ<sub>C</sub> = 54.00 ppm; residual CHDCl<sub>2</sub>: δ<sub>H</sub> = 5.32 ppm; C<sub>6</sub>D<sub>6</sub>: δ<sub>C</sub> = 128.06 ppm; residual C<sub>6</sub>H<sub>5</sub>: δ<sub>H</sub> = 7.16 ppm; [D<sub>3</sub>]-acetonitrile: δ<sub>C</sub> = 118.26 ppm ; residual [D<sub>2</sub>]-acetonitrile: δ<sub>H</sub> = 1.94 ppm; [D<sub>6</sub>]-acetone: δ<sub>C</sub> = 29.8 ppm; residual [D<sub>5</sub>]-acetone: δ<sub>H</sub> = 2.05 ppm). Proton and carbon assignments were established using HSQC, HMBC and NOESY experiments.

IR: Alpha Platinum ATR (Bruker), wavenumbers ( $\tilde{\nu}$ ) in cm<sup>-1</sup>.

MS (EI): Finnigan MAT 8200 (70 eV), ESI-MS: ESQ 3000 (Bruker) or Thermo Scientific LTQ-FT or Thermo Scientific Exactive. HRMS: Bruker APEX III FT-MS (7 T magnet) or MAT 95 (Finnigan) or Thermo Scientific LTQ-FT or Thermo Scientific Exactive. GC-MS was measured on a Shimadzu GCMS-QP2010 Ultra instrument.

Headspace GC-FID samples were measured on an Agilent Technology 6890 or 7890 chromatograph with a 30 m HP-plot Al<sub>2</sub>O<sub>3</sub> column (0.25 mm  $\phi$ , 5 μm film) using H<sub>2</sub> as the carrier gas. Headspace GC/MS samples were measured on an Agilent Technology 7890A instrument with AT 5975C MSD detection.

Hydrogen gas (N50, ≥99.999 Vol.%) was purchased from AirLiquide and was used without further purification. Deuterium gas (99.8 atom% D, 99.995% purity) was purchased from SigmaAldrich. Both hydrogen and deuterium were handled with standard balloon techniques.

Unless stated otherwise, all commercially available compounds (abcr, Acros, TCI, Aldrich, Alfa Aesar) were used as received. The ruthenium complexes [Cp\*<sup>+</sup>RuCl]<sub>4</sub><sup>[1]</sup> and [Cp(Me<sub>2</sub>CO<sub>2</sub>Et)Ru(NCMe)<sub>3</sub>][PF<sub>6</sub>] (**27**, abbreviated [Cp<sup>F</sup>Ru(NCMe)<sub>3</sub>][PF<sub>6</sub>])<sup>[2]</sup> were prepared according to literature procedures.

## HYDROGENATIVE CYCLOPROPANATION AND METATHESIS

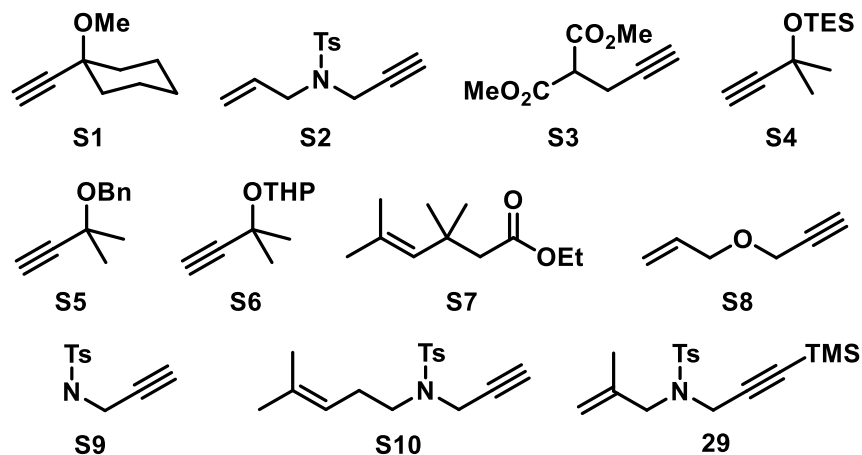

The compounds **S1**<sup>[3]</sup>, **S2**<sup>[4]</sup>, **S3**<sup>[5]</sup>, **S4**<sup>[6]</sup>, **S5**<sup>[7]</sup>, **S6**<sup>[8]</sup>, **S7**<sup>[9]</sup>, **S8**<sup>[10]</sup>, **S9**<sup>[11]</sup>, **S10**<sup>[12]</sup>, **29**<sup>[13]</sup> were prepared according to literature procedures

### BUILDING BLOCKS

**Tetrahydrofuran-2-ol (S11).** DIBAL-H (1 M in CH<sub>2</sub>Cl<sub>2</sub>, 34.8 mL, 34.8 mmol) was slowly added to a solution of 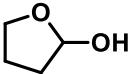 (2.5 g, 29.0 mmol) in CH<sub>2</sub>Cl<sub>2</sub> (12 mL) at -78 °C and stirring was continued for 1.5 h at that temperature. MeOH (3 mL) and sat. Rochelle salt solution (3 mL) were introduced, the mixture was warmed to room temperature and vigorously stirred for 2 h until clean separation of the layers was reached. The aqueous phase was extracted with CH<sub>2</sub>Cl<sub>2</sub> (3 x 25 mL) and the combined organic layers were dried over MgSO<sub>4</sub>. The solvent was removed under reduced pressure and the crude product was used without further purification (colorless oil, 1.06 g, 41%). <sup>1</sup>H NMR (400 MHz, CDCl<sub>3</sub>) δ 5.53 (dd, *J* = 4.4, 1.6 Hz, 1H), 4.04 (td, *J* = 7.7, 7.2, 4.9 Hz, 1H), 3.89 – 3.80 (m, 1H), 2.12 – 1.99 (m, 1H), 1.99 – 1.80 (m, 3H). <sup>13</sup>C NMR (101 MHz, CDCl<sub>3</sub>) δ 98.5, 67.5, 33.3, 23.6. The spectral data is consistent with previously reported values.<sup>[14]</sup>

**5-Methylhex-4-en-1-ol (S12).** A solution of KO<sup>t</sup>Bu (1.16 g, 10.4 mmol) in THF (7.7 mL) was added to a suspension of isopropyltriphenylphosphonium iodide (4.1 g, 9.5 mmol) in THF (10.0 mL) at -78 °C. The mixture was warmed to 0 °C and stirred for 30 min at that temperature before a solution of lactol **S11** (0.76 g, 8.63 mmol) in THF (4.2 mL) was introduced. The mixture was stirred at room temperature for 18 h before water (10 mL) and Et<sub>2</sub>O (50 mL) were added. The layers were separated, the aqueous phase was extracted with Et<sub>2</sub>O (2 x 50 mL) and the combined organic layers were dried over MgSO<sub>4</sub>. The solvent was removed under reduced pressure and the residue was purified by flash chromatography (silica, pentane/Et<sub>2</sub>O, 7:3) to furnish the product as a colorless liquid (444 mg, 45%). <sup>1</sup>H NMR (400 MHz, CDCl<sub>3</sub>) δ 5.13 (tdq, *J* = 7.2, 2.9, 1.4 Hz, 1H), 3.64 (t, *J* = 6.5 Hz, 2H), 2.11 – 2.02 (m, 2H), 1.69 (q, *J* = 1.3 Hz, 3H), 1.65 – 1.57 (m, 5H), 1.40 (br, 1H). <sup>13</sup>C NMR (101 MHz, CDCl<sub>3</sub>) δ 132.4, 124.0, 62.9, 32.9, 25.9, 24.5, 17.8. The spectral data is consistent with previously reported values.<sup>[15]</sup>



**6-Bromo-2-methylhex-2-ene (S13).** Br<sub>2</sub> (0.38 mL, 7.2 mmol) was added dropwise to a solution of PPh<sub>3</sub> (2.0 g, 7.7 mmol) and imidazole (870 mg, 12.7 mmol) in CH<sub>2</sub>Cl<sub>2</sub> (13.6 mL) at 0 °C. The mixture was stirred for 15 min before alcohol **S12** (440 mg, 3.9 mmol) was added at 0 °C. Stirring was continued for 45 min at 0 °C and for another 1 h at room temperature.

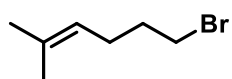

The suspension was successively washed with H<sub>2</sub>O<sub>2</sub> solution (3 % H<sub>2</sub>O<sub>2</sub> in water, 2 x 3 mL) and aq. Na<sub>2</sub>S<sub>2</sub>O<sub>3</sub> solution (1 M, 2 x 10 mL). The combined thiosulfate layers were extracted with CH<sub>2</sub>Cl<sub>2</sub> (2 x 40 mL) and the combined organic layers were dried over MgSO<sub>4</sub>. The solvent was removed under reduced pressure. The solid residue was suspended in hexanes (20 mL) by means of short ultrasonication and the resulting suspension filtered through a short plug of silica, thoroughly rinsing with hexanes (200 mL). The combined filtrates were concentrated under reduced pressure to give the product as a colorless liquid (622 mg, 91%). <sup>1</sup>H NMR (400 MHz, CDCl<sub>3</sub>) δ 5.07 (tdq, *J* = 7.3, 2.9, 1.3 Hz, 1H), 3.40 (t, *J* = 6.7 Hz, 2H), 2.13 (q, *J* = 7.1 Hz, 2H), 1.89 (p, *J* = 6.9 Hz, 2H), 1.70 (q, *J* = 1.3 Hz, 3H), 1.63 (d, *J* = 1.3 Hz, 3H). <sup>13</sup>C NMR (101 MHz, CDCl<sub>3</sub>) δ 133.3, 122.6, 33.8, 33.0, 26.6, 25.9, 17.9. The spectral data is consistent with previously reported values.<sup>[16]</sup>

**4-Methyl-N-(3-methylbut-2-en-1-yl)-N-(prop-2-yn-1-yl)benzenesulfonamide (S14).** 1-Bromo-3-methyl-2-butene (0.66 mL, 5.7 mmol) was added to a solution of N-tosylpropargylamine **S9** (1.00 g, 4.8 mmol and K<sub>2</sub>CO<sub>3</sub> (1.32 g, 9.6 mmol) in MeCN (8 mL). The mixture was stirred at 60 °C for 6 h before it was cooled to room temperature and diluted with MeCN (10 mL). The suspension was filtered through a pad of Celite and the filter cake was washed with EtOAc (40 mL). The combined filtrates were evaporated and the crude product was purified by flash chromatography (silica, hexanes/EtOAc 10:1 – 6:1 – 4:1) to give the title compound as a colorless oil (923 mg, 70%).

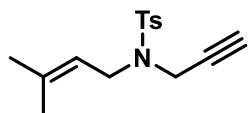

<sup>1</sup>H NMR (400 MHz, CDCl<sub>3</sub>) δ 7.76 – 7.71 (m, 2H), 7.31 – 7.27 (m, 2H), 5.10 (tdq, *J* = 7.2, 2.8, 1.4 Hz, 1H), 4.07 (d, *J* = 2.5 Hz, 2H), 3.81 (d, *J* = 7.3 Hz, 2H), 2.42 (s, 3H), 1.98 (t, *J* = 2.5 Hz, 1H), 1.72 (q, *J* = 1.1 Hz, 3H), 1.67 (d, *J* = 1.3 Hz, 3H). <sup>13</sup>C NMR (101 MHz, CDCl<sub>3</sub>) δ 143.5, 139.2, 136.3, 129.5, 128.0, 118.1, 77.2, 73.5, 44.1, 35.5, 26.0, 21.7, 18.0. The spectral data is consistent with previously reported values.<sup>[17]</sup>

**5-Methylhex-4-enal (S15).** 2-Methyl-3-buten-2-ol (8.0 g, 93 mmol), ethyl vinyl ether (17.8 mL, 186 mmol) and H<sub>3</sub>PO<sub>4</sub> (85%, 0.1 mL, 1.4 mmol) were stirred in a sealed thick-walled pressure Schlenk flask for 2.5 h at 150 °C. The mixture was cooled to room temperature before Et<sub>3</sub>N (0.6 mL, 4.2 mmol) was added. The crude product was purified by distillation under reduced pressure (60 mbar, 120 °C bath temperature). The product was obtained as a colorless oil by collecting the fraction boiling at ≈72 °C (2.38 g, 23%). <sup>1</sup>H NMR (400 MHz, CDCl<sub>3</sub>) δ 9.76 (t, *J* = 1.8 Hz, 1H), 5.09 (tdq, *J* = 7.1, 2.9, 1.5 Hz, 1H), 2.48 – 2.43 (m, 2H), 2.37 – 2.26 (m, 2H), 1.69 (q, *J* = 1.3 Hz, 3H), 1.63 (s, 3H). <sup>13</sup>C NMR (101 MHz, CDCl<sub>3</sub>) δ 202.8, 133.4, 122.3, 44.1, 25.8, 21.1, 17.9. The spectral data is consistent with previously reported values.<sup>[18]</sup>

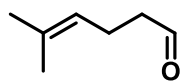

**3-Methylbut-2-en-1-yl propiolate (S16).** Propiolic acid (500 mg, 7.1 mmol) and 1-bromo-3-methyl-2-butene (1.65 mL, 14.3 mmol) were added to a stirred suspension of NaHCO<sub>3</sub> (1.2 g, 14.3 mmol) in DMF (8.8 mL) at room temperature. The mixture was stirred for 18 h before it was diluted with water (60 mL) and Et<sub>2</sub>O (30 mL). The aqueous phase was extracted with Et<sub>2</sub>O (2 x 30 mL) and the combined organic layers were washed with water (60 mL) and

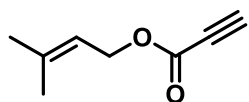

dried over MgSO<sub>4</sub>. The solvent was removed under reduced pressure and the crude product was purified by flash chromatography (silica, pentane/Et<sub>2</sub>O 10:1) to give the title compound as a colorless oil (993 mg, quant.). <sup>1</sup>H NMR (400 MHz, CDCl<sub>3</sub>) δ 5.37 (tdq, *J* = 7.2, 2.9, 1.5 Hz, 1H), 4.69 (dt, *J* = 7.4, 0.8 Hz, 2H), 2.85 (s, 1H), 1.80 – 1.74 (m, 3H), 1.75 – 1.70 (m, 3H). <sup>13</sup>C NMR (101 MHz, CDCl<sub>3</sub>) δ 152.91, 140.95, 117.46, 74.90, 74.57, 63.22, 25.93, 18.21. IR (film) ν 3271, 2975, 2937, 2119, 1707 cm<sup>-1</sup>. HRMS (ESI<sup>+</sup>) for C<sub>8</sub>H<sub>10</sub>O<sub>2</sub> [M+H]<sup>+</sup>: calcd: 139.0734, found: 139.0754.

**4-Methylpent-1-en-3-ol (S17).** Freshly distilled isobutyraldehyd (3.02 g, 41.7 mmol) in Et<sub>2</sub>O (44 mL) was added over 30 min to a stirred solution of vinylmagnesium bromide (1 M in THF, 50 mL, 50 mmol) at -78 °C. The mixture was stirred for 1 h at -78 °C before being allowed to reach room temperature. The mixture was acidified with aqueous HCl (1 M, 55 mL) and the layers were separated. The aqueous phase was extracted with Et<sub>2</sub>O (3 x 100 mL) and the combined organic layers were washed with brine and dried over MgSO<sub>4</sub>. The solvent was removed under reduced pressure and the resulting crude product used without further purification (light yellow liquid, 3.75 g, 90%). <sup>1</sup>H NMR (400 MHz, CDCl<sub>3</sub>) δ 5.86 (ddd, *J* = 17.1, 10.4, 6.4 Hz, 1H), 5.22 (dt, *J* = 17.2, 1.5 Hz, 1H), 5.15 (ddd, *J* = 10.4, 1.7, 1.1 Hz, 1H), 3.88 – 3.83 (m, 1H), 1.80 – 1.67 (m, 1H), 0.93 (d, *J* = 6.8 Hz, 3H), 0.90 (d, *J* = 6.8 Hz, 3H). <sup>13</sup>C NMR (101 MHz, CDCl<sub>3</sub>) δ 139.6, 115.7, 78.4, 33.7, 18.3, 17.9. The spectral data is consistent with previously reported values.<sup>[19]</sup>

**Methyl (E)-6-methylhept-4-enoate (S18).** Alcohol **S17** (3.75 g, 37.4 mmol) was added to trimethylorthoacetate (14.3 mL, 112 mmol) and propionic acid (138 mg, 1.9 mmol) in a thick-walled pressure Schlenk flask. The sealed flask was immersed in a heating bath at 120 °C and the mixture stirred for 14 h. The mixture was allowed to cool to room temperature and then stirred again at 120 °C open to air. After reaching ambient temperature, the solution was diluted with CH<sub>2</sub>Cl<sub>2</sub> (50 mL) and aqueous HCl (1 M, 10 mL). The mixture was stirred for 1 h at room temperature before the layers were separated and the aqueous phase extracted with CH<sub>2</sub>Cl<sub>2</sub> (2 x 100 mL). The combined organic layers were washed with sat. aq. NaHCO<sub>3</sub> and dried over MgSO<sub>4</sub>. The solvent was removed under reduced pressure and the resulting crude product was used without further purification in the next step (colorless oil, 5.45 g, 93%). <sup>1</sup>H NMR (400 MHz, CDCl<sub>3</sub>) δ 5.43 (ddt, *J* = 15.4, 6.2, 1.0 Hz, 1H), 5.34 (dtd, *J* = 15.3, 6.0, 1.0 Hz, 1H), 3.66 (s, 3H), 2.40 – 2.33 (m, 2H), 2.33 – 2.26 (m, 2H), 2.26 – 2.17 (m, 1H), 0.95 (d, *J* = 6.8 Hz, 6H). <sup>13</sup>C NMR (101 MHz, CDCl<sub>3</sub>) δ 173.9, 139.1, 125.0, 51.6, 34.4, 31.1, 28.0, 22.7.

**(E)-6-Methylhept-4-en-1-ol (S19).** LiAlH<sub>4</sub> (1.7 g, 45 mmol) was added in portions to a solution of ester **S18** (2.0 g, 12.8 mmol) in Et<sub>2</sub>O (40 mL) at 0 °C. The mixture was warmed to room temperature and stirring was continued for 4 h before water (2 mL) and NaOH (2 mL, 15% in water) were carefully added. The mixture was stirred for 15 min at room temperature before more water (6 mL) was added. After stirring for additional 15 min, the suspension was filtrated through a glass frit, the residue was washed with Et<sub>2</sub>O (20 mL) and the combined filtrates were dried over Na<sub>2</sub>SO<sub>4</sub>. The solvent was removed under reduced pressure and the resulting crude material used in the next step without further purification (colorless liquid, 1.65 g, quant.). <sup>1</sup>H NMR (400 MHz, CDCl<sub>3</sub>) δ 5.47 – 5.32 (m, 2H), 3.65 (t, *J* = 6.5 Hz, 2H), 2.30 – 2.17 (m, 1H), 2.11 – 2.03 (m, 2H),

1.69 – 1.57 (m, 2H), 0.96 (d,  $J = 6.7$  Hz, 6H).  $^{13}\text{C}$  NMR (101 MHz,  $\text{CDCl}_3$ )  $\delta$  138.5, 126.5, 62.8, 32.6, 31.1, 29.0, 22.8. The spectral data is consistent with previously reported values.<sup>[20]</sup>

**(E)-7-Bromo-2-methylhept-3-ene (S20).**  $\text{Br}_2$  (0.67 mL, 13.0 mmol) was added dropwise to a solution of  $\text{PPh}_3$  (3.60 g, 13.7 mmol) and imidazole (1.54 g, 22.6 mmol) in  $\text{CH}_2\text{Cl}_2$  (24 mL) at  $0^\circ\text{C}$ . The mixture was stirred for 15 min before alcohol **S19** (880 mg, 6.9 mmol) was added at  $0^\circ\text{C}$ . Stirring was continued for 30 min at  $0^\circ\text{C}$  and for 1 h at ambient temperature. The suspension was washed with  $\text{H}_2\text{O}_2$  solution (3 %  $\text{H}_2\text{O}_2$  in water, 2 x 6 mL) and  $\text{Na}_2\text{S}_2\text{O}_3$  solution (1 M, 2 x 20 mL). The combined thiosulfate layers were extracted with  $\text{CH}_2\text{Cl}_2$  (2 x 80 mL) and the combined organic phases were dried over  $\text{MgSO}_4$ . The solvent was removed under reduced pressure. The solid white residue was suspended in hexanes (30 mL) by means of short ultrasonication and the suspension filtered through a plug of silica. The filter cake and silica were thoroughly rinsed with hexanes (300 mL) and the combined filtrates were evaporated to give the product as a colorless liquid (1.08 g, 83%).  $^1\text{H}$  NMR (400 MHz,  $\text{CDCl}_3$ )  $\delta$  5.45 (ddt,  $J = 15.3, 6.5, 1.3$  Hz, 1H), 5.30 (dtd,  $J = 15.3, 6.7, 1.2$  Hz, 1H), 3.40 (t,  $J = 6.8$  Hz, 2H), 2.31 – 2.17 (m, 1H), 2.18 – 2.07 (m, 2H), 1.91 (p,  $J = 7.0$  Hz, 2H), 0.96 (d,  $J = 6.7$  Hz, 6H).  $^{13}\text{C}$  NMR (101 MHz,  $\text{CDCl}_3$ )  $\delta$  139.5, 124.9, 33.5, 32.7, 31.2, 31.0, 22.7.

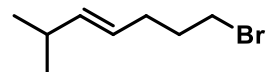

**2-(5-(1-Methoxycyclohexyl)pent-4-yn-1-yl)-1,3-dioxolane (S21).**  $n\text{-BuLi}$  (1.6 M in hexanes, 1.63 mL, 2.60 mmol) was added slowly to a solution of alkyne **S1** (300 mg, 2.17 mmol) in THF (7.6 mL) at  $0^\circ\text{C}$ . The mixture was stirred for 30 min at  $0^\circ\text{C}$  before a solution of 2-(3-bromopropyl)-1,3-dioxolane (508 mg, 2.60 mmol) in THF (4.9 mL) and DMPU (1.3 mL) was added. The mixture was stirred at room temperature for 18 h. sat.  $\text{NH}_4\text{Cl}$  solution (3 mL), *tert*-butyl methyl ether (20 mL) and water (3 mL) were added and the layers were separated. The aqueous phase was extracted with *tert*-butyl methyl ether (3 x 40 mL) and the combined organic layers were washed with brine and dried over  $\text{MgSO}_4$ . The solvent was removed under reduced pressure and the residue purified by flash chromatography (silica, hexanes/EtOAc 1:0 – 80:1 – 40:1) to give the product as a colorless oil (301 mg, 55%).  $^1\text{H}$  NMR (400 MHz,  $\text{CDCl}_3$ )  $\delta$  4.89 (t,  $J = 4.7$  Hz, 1H), 4.01 – 3.92 (m, 2H), 3.90 – 3.81 (m, 2H), 3.34 (s, 3H), 2.30 (t,  $J = 7.0$  Hz, 2H), 1.89 – 1.82 (m, 2H), 1.82 – 1.74 (m, 2H), 1.65 (m, 5H), 1.57 – 1.45 (m, 4H), 1.25 (m, 1H).  $^{13}\text{C}$  NMR (101 MHz,  $\text{CDCl}_3$ )  $\delta$  104.36, 85.93, 81.62, 74.16, 65.03, 50.63, 37.16, 33.15, 25.70, 23.61, 23.06, 18.82. IR (film)  $\tilde{\nu}$  2935, 2859, 1449, 1142, 1091  $\text{cm}^{-1}$ . HRMS (ESI<sup>+</sup>) for  $\text{C}_{15}\text{H}_{24}\text{O}_3$  [ $\text{M}+\text{Na}$ ]<sup>+</sup>: calcd: 275.1618, found: 275.1618.

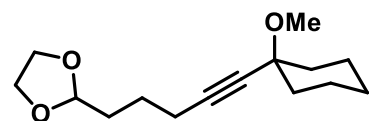

**6-(1-Methoxycyclohexyl)hex-5-ynal (S22).** A solution of dioxolane **S21** (150 mg, 0.59 mmol) in acetone (2.7 mL) was added to a solution of *p*-TsOH $\cdot$ H $_2$ O (6 mg, 0.03 mmol) in water (2.7 mL). The mixture was stirred at  $70^\circ\text{C}$  for 3 h before sat.  $\text{NaHCO}_3$  solution (2 mL) was introduced. The mixture was diluted with *tert*-butyl methyl ether (10 mL) and the layers were separated. The aqueous phase was extracted with *tert*-butyl methyl ether (3 x 30 mL) and the combined organic layers were washed with brine and dried over  $\text{MgSO}_4$ . The solvent was removed under reduced pressure and the crude product was purified by flash chromatography (silica, hexanes/EtOAc 20:1 – 10:1) to give the title compound as a colorless oil (110 mg, 89%).  $^1\text{H}$  NMR (400 MHz,  $\text{CDCl}_3$ )  $\delta$  9.81 (t,  $J = 1.4$  Hz, 1H), 3.33 (s, 3H), 2.59 (td,  $J = 7.2, 1.4$  Hz, 2H), 2.33 (t,  $J = 6.9$  Hz, 2H), 1.90 – 1.80 (m, 4H), 1.69 – 1.59 (m, 2H), 1.59 – 1.44 (m, 5H), 1.33 – 1.23

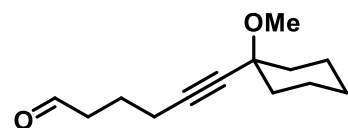

(m, 1H).  $^{13}\text{C}$  NMR (101 MHz,  $\text{CDCl}_3$ )  $\delta$  202.0, 84.9, 82.5, 74.1, 50.6, 43.0, 37.1, 25.6, 23.0, 21.5, 18.3. IR (film)  $\tilde{\nu}$  2935, 2857, 1725, 1448, 1091  $\text{cm}^{-1}$ . HRMS (ESI $^+$ ) for  $\text{C}_{13}\text{H}_{20}\text{O}_2$  [M+Na] $^+$ : calcd: 231.1355, found: 231.1357.

***tert*-Butyl((5-(1-methoxycyclohexyl)pent-4-yn-1-yl)oxy)dimethylsilane (S23).** *n*-BuLi (1.6 M in hexanes, 1.63 mL, 2.60 mmol) was slowly added to a solution of alkyne **S1** (300 mg, 2.17 mmol) in THF (7.5 mL) at 0 °C. The mixture was stirred for 30 min at 0 °C before a solution of (3-bromopropoxy)*tert*-butyl dimethylsilane (659 mg, 2.60 mmol) in THF (5 mL) and DMPU (1.3 mL) was added. The mixture was allowed to reach room temperature and stirring was continued for 22 h. sat.  $\text{NH}_4\text{Cl}$  solution (4 mL), *tert*-butyl methyl ether (20 mL) and water (4 mL) were added and the layers were separated. The aqueous phase was extracted with *tert*-butyl methyl ether (3 x 40 mL) and the combined organic layers were washed with brine and dried over  $\text{MgSO}_4$ . The solvent was removed and the residue was purified by flash chromatography (silica, hexanes/EtOAc 1:0 – 50:1 – 40:1) to give the title compound as a colorless oil (396 mg, 59%).  $^1\text{H}$  NMR (400 MHz,  $\text{CDCl}_3$ )  $\delta$  3.71 (t,  $J$  = 6.1 Hz, 2H), 3.34 (s, 3H), 2.32 (t,  $J$  = 7.0 Hz, 2H), 1.90 – 1.78 (m, 2H), 1.72 (p,  $J$  = 7.0 Hz, 2H), 1.68 – 1.58 (m, 2H), 1.58 – 1.45 (m, 5H), 1.32 – 1.23 (m, 1H), 0.90 (s, 9H), 0.06 (s, 6H).  $^{13}\text{C}$  NMR (101 MHz,  $\text{CDCl}_3$ )  $\delta$  86.1, 81.3, 74.2, 61.8, 50.6, 37.2, 32.1, 26.1, 25.7, 23.1, 18.5, 15.2, -5.2. IR (neat)  $\tilde{\nu}$  2933, 2857, 1255, 1096, 836  $\text{cm}^{-1}$ . HRMS (ESI $^+$ ) for  $\text{C}_{18}\text{H}_{34}\text{O}_2\text{Si}$  [M+Na] $^+$ : calcd 333.2220, found 333.2222.

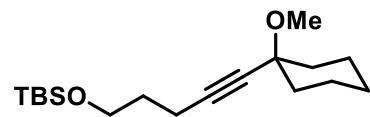

**5-(1-Methoxycyclohexyl)pent-4-yn-1-ol (S24).** TBAF (1 M in THF, 1.88 mL, 1.88 mmol) was added to a solution of silyl ether **S23** (390 mg, 1.26 mmol) in THF (8 mL) at 0 °C. The mixture was allowed to reach room temperature and was stirred for 30 min before sat.  $\text{NH}_4\text{Cl}$  solution (2 mL) and water (2 mL) were added. The layers were separated and the aqueous phase was extracted with EtOAc (3 x 30 mL). The combined organic layers were washed with brine and dried over  $\text{MgSO}_4$ . The solvent was evaporated and the crude product was purified by flash chromatography (silica, hexanes/EtOAc 5:1 – 2:1) to obtain the title compound as a colorless oil (186 mg, 75%).  $^1\text{H}$  NMR (400 MHz,  $\text{CDCl}_3$ )  $\delta$  3.77 (t,  $J$  = 6.2 Hz, 2H), 3.34 (s, 3H), 2.37 (t,  $J$  = 6.9 Hz, 2H), 1.89 – 1.82 (m, 2H), 1.79 (m, 2H), 1.69 – 1.59 (m, 2H), 1.58 – 1.44 (m, 6H), 1.32 – 1.23 (m, 1H).  $^{13}\text{C}$  NMR (101 MHz,  $\text{CDCl}_3$ )  $\delta$  85.5, 81.9, 74.1, 62.0, 50.6, 37.1, 31.7, 25.7, 23.0, 15.5. IR (neat)  $\tilde{\nu}$  3364 (br), 2932, 2856, 2231, 1446, 1078  $\text{cm}^{-1}$ . HRMS (EI) for  $\text{C}_{12}\text{H}_{20}\text{O}_2$  [M+Na] $^+$ : calcd 196.1458, found 196.1457.

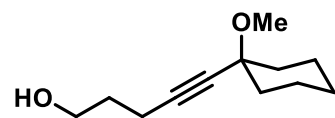

**5-(1-Methoxycyclohexyl)pent-4-ynal (S25).**  $\text{NaHCO}_3$  (336 mg, 4.0 mmol) and Dess-Martin periodinane (508 mg, 1.2 mmol) were added to a solution of alcohol **S24** (157 mg, 0.8 mmol) in wet  $\text{CH}_2\text{Cl}_2$  (7.4 mL) at 0 °C. The mixture was stirred at room temperature for 30 min before aq. sat.  $\text{Na}_2\text{S}_2\text{O}_3$  (3 mL) and water (3 mL) were added. The layers were separated and the aqueous phase was extracted with  $\text{CH}_2\text{Cl}_2$  (2 x 20 mL). The combined organic layers were washed with brine and dried over  $\text{MgSO}_4$ . The solvent was evaporated and the residue was purified by flash chromatography (silica, hexanes/ methyl *tert*-butyl ether 1:0 – 10:1 – 5:1) to give the product as a colorless oil (109 mg, 70%).  $^1\text{H}$  NMR (400 MHz,  $\text{CDCl}_3$ )  $\delta$  9.81 (t,  $J$  = 1.4 Hz, 1H), 3.32 (s, 3H), 2.67 (tt,  $J$  = 6.9, 1.3 Hz, 2H), 2.57 (td,  $J$  = 7.0, 1.2 Hz, 2H), 1.87 – 1.77 (m, 2H), 1.62 (m, 2H), 1.56 – 1.40 (m, 5H), 1.32 – 1.18 (m, 1H).  $^{13}\text{C}$  NMR (101 MHz,  $\text{CDCl}_3$ )  $\delta$  200.7, 84.1, 82.5, 74.1, 50.7, 43.0, 37.0,

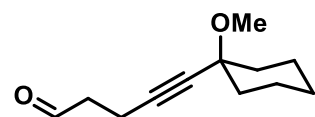

25.6, 23.0, 12.3. IR (neat)  $\tilde{\nu}$  2933, 2856, 1725, 1446, 1089  $\text{cm}^{-1}$ . HRMS (ESI<sup>+</sup>) for  $\text{C}_{12}\text{H}_{18}\text{O}_2$  [M+Na]<sup>+</sup>: calcd 217.1199, found 217.1201.

**8-(1-Methoxycyclohexyl)-2-methyloct-2-en-7-yn-4-ol (S26).** A solution of aldehyde **S25** (100 mg, 0.51 mmol) in Et<sub>2</sub>O (2 mL) was slowly added to a solution of (2-methylprop-1-en-1-yl)magnesium bromide (0.5 M in THF, 1.54 mL, 0.77 mmol) in Et<sub>2</sub>O (5.4 mL) at -78 °C and the mixture was stirred for 1 h at that temperature. The mixture was allowed to reach room temperature before sat. NH<sub>4</sub>Cl solution (1 mL) was added and the layers

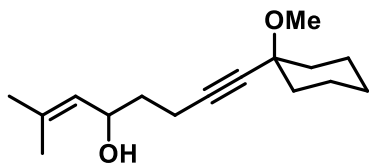

were separated. The aqueous phase was extracted with EtOAc (3 x 20 mL) and the combined organic layers were washed with brine and dried over MgSO<sub>4</sub>. The solvent was evaporated and the crude product was purified by flash chromatography (silica, hexanes/EtOAc 4:1) to yield the title compound as a colorless oil (74 mg, 57%). <sup>1</sup>H NMR (400 MHz CDCl<sub>3</sub>)  $\delta$  5.17 (ddq,  $J$  = 8.6, 2.8, 1.4 Hz, 1H), 4.52 (ddd,  $J$  = 8.8, 7.4, 5.8 Hz, 1H), 3.34 (s, 3H), 2.36 (dt,  $J$  = 16.9, 7.2 Hz, 1H), 2.28 (dt,  $J$  = 16.8, 7.0 Hz, 1H), 1.85 (m, 2H), 1.79 (dd,  $J$  = 13.4, 7.2 Hz, 1H), 1.73 (d,  $J$  = 1.4 Hz, 3H), 1.70 (d,  $J$  = 1.4 Hz, 3H), 1.68 – 1.59 (m, 3H), 1.58 – 1.46 (m, 6H), 1.28 (m, 1H). <sup>13</sup>C NMR (101 MHz, CDCl<sub>3</sub>)  $\delta$  135.9, 127.5, 85.9, 81.6, 74.2, 67.9, 50.6, 37.2, 37.1, 36.7, 26.0, 25.7, 23.1 (2C), 18.4, 15.3. IR (neat)  $\tilde{\nu}$  3371 (br), 2932, 2231, 1445, 1079  $\text{cm}^{-1}$ . HRMS (ESI<sup>+</sup>) for  $\text{C}_{16}\text{H}_{26}\text{O}_2$  [M+Na]<sup>+</sup>: calcd 273.1825, found 273.1825.

**1-Ethynyl-1-(methoxymethoxy)cyclohexane (S27).** A solution of 1-ethynyl-1-cyclohexanol (4.0 g, 32.2 mmol) in THF (15 mL) was slowly added to a stirred suspension of NaH (1.55 g, 64.4 mmol) in THF (65 mL) at 0 °C. The mixture was stirred for 30 min at room temperature before MOMCl (0.61 mL, 8.1 mmol) was added at 0 °C. Stirring was continued for 2 h at room temperature before aq. sat. NH<sub>4</sub>Cl (6 mL), water (4 mL) and *tert*-butyl methyl ether (80 mL) were introduced. The aqueous phase was extracted with *tert*-butyl methyl ether (2 x 100 mL) and the combined organic layers were washed with brine and dried over MgSO<sub>4</sub>. The solvent was evaporated and the residue purified by flash chromatography (silica, hexanes/EtOAc 20:1 – 10:1) to give the title compound as a colorless oil (5.06 g, 93%). <sup>1</sup>H NMR (400 MHz, CDCl<sub>3</sub>)  $\delta$  4.94 (s, 2H), 3.40 (s, 3H), 2.52 (s, 1H), 2.01 – 1.91 (m, 2H), 1.73 – 1.48 (m, 7H), 1.33 – 1.18 (m, 1H). <sup>13</sup>C NMR (101 MHz, CDCl<sub>3</sub>)  $\delta$  92.9, 84.9, 74.8, 74.7, 56.0, 38.6, 25.4, 23.0. IR (film)  $\tilde{\nu}$  3305, 3264, 2934, 1149, 1023  $\text{cm}^{-1}$ . HRMS (ESI<sup>+</sup>) for  $\text{C}_{10}\text{H}_{16}\text{O}_2$  [M+Na]<sup>+</sup>: calcd: 191.1042, found: 191.1042.

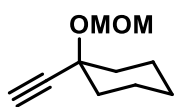

***tert*-Butyl((1-ethynylcyclohexyl)oxy)dimethylsilane (S28).** TBSOTf (0.83 mL, 3.6 mmol) was added to a solution of 1-ethynyl-1-cyclohexanol (500 mg, 4.0 mmol) and 2,6-lutidine (0.94 mL, 8.1 mmol) in CH<sub>2</sub>Cl<sub>2</sub> (10.8 mL) at 0 °C. The mixture was stirred for 2 h before water (2 mL) was added. After reaching room temperature, the layers were separated and the aqueous phase was extracted with CH<sub>2</sub>Cl<sub>2</sub> (3 x 50 mL). The combined organic layers were washed with brine and dried over MgSO<sub>4</sub>. The solvent was removed under reduced pressure and the crude product was purified by flash chromatography (silica, hexanes) to yield the title compound as a colorless oil (610 mg, 71%). <sup>1</sup>H NMR (400 MHz, CDCl<sub>3</sub>)  $\delta$  2.45 (s, 1H), 1.84 – 1.74 (m, 2H), 1.71 – 1.57 (m, 4H), 1.57 – 1.47 (m, 2H), 1.47 – 1.38 (m, 1H), 1.37 – 1.25 (m, 1H), 0.88 (s, 9H), 0.17 (s, 6H). <sup>13</sup>C NMR (101 MHz, CDCl<sub>3</sub>)  $\delta$  88.7, 72.8,

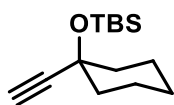

69.2, 41.2, 26.0, 25.4, 22.8, 18.3, -2.7. IR (film)  $\tilde{\nu}$  3310, 2932, 2856, 1252, 1101, 835, 774  $\text{cm}^{-1}$ . HRMS (ESI<sup>+</sup>) for  $\text{C}_{14}\text{H}_{26}\text{OSi}$  [M+H]<sup>+</sup>: calcd: 239.1826, found: 239.1825.

**N-(4-Hydroxy-4-methylpent-2-yn-1-yl)-4-methyl-N-(3-methylbut-2-en-1-yl)benzenesulfonamide (S29).**

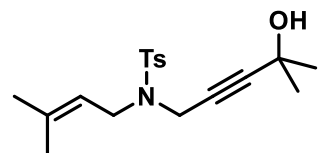

*n*-BuLi (1.6 M in hexanes, 1.35 mL, 2.16 mmol) was slowly added to a solution of alkyne **S14** (460 mg, 1.66 mmol) in THF (17.5 mL) at 0 °C. The solution was stirred for 30 min at 0 °C before acetone (1.22 mL, 16.6 mmol) was introduced. After stirring at room temperature for 30 min, sat.  $\text{NH}_4\text{Cl}$  solution (3 mL) and EtOAc (30 mL) were added, the layers were separated and the aqueous phase was extracted with EtOAc (2 x 30 mL). The combined organic layers were washed with brine and dried over  $\text{MgSO}_4$ . The solvent was removed under reduced pressure and the crude product was purified by flash chromatography (silica, hexanes/EtOAc 4:1 – 2:1) to yield the title compound as a pale yellow amorphous solid (297 mg, 53%). <sup>1</sup>H NMR (400 MHz,  $\text{CDCl}_3$ )  $\delta$  7.78 – 7.72 (m, 2H), 7.34 – 7.29 (m, 2H), 5.11 (ddq,  $J$  = 8.8, 5.8, 1.4 Hz, 1H), 4.07 (s, 2H), 3.81 (d,  $J$  = 7.3 Hz, 2H), 2.43 (s, 3H), 1.73 (s, 3H), 1.68 (s, 3H), 1.47 (br, 1H), 1.25 (s, 6H). <sup>13</sup>C NMR (101 MHz,  $\text{CDCl}_3$ )  $\delta$  143.5, 139.1, 136.6, 129.6, 128.1, 118.1, 90.1, 75.3, 64.9, 44.1, 35.7, 31.1, 26.0, 21.6, 18.0. IR (film)  $\tilde{\nu}$  3522, 2979, 2921, 1596, 1327, 1152  $\text{cm}^{-1}$ . HRMS (ESI<sup>+</sup>) for  $\text{C}_{18}\text{H}_{25}\text{O}_3\text{S}$  [M+Na]<sup>+</sup>: calcd: 358.1447, found: 358.1444.

**N-Allyl-N-(4-hydroxy-4-methylpent-2-yn-1-yl)-4-methylbenzenesulfonamide (S30).**

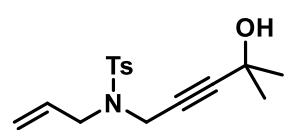

*n*-BuLi (1.6 M in hexanes, 0.59 mL, 0.94 mmol) was added slowly to a solution of alkyne **S2** (181 mg, 0.73 mmol) in THF (7.6 mL) at 0 °C. The solution was stirred for 30 min at 0 °C before acetone (0.75 mL, 10.1 mmol) was introduced. The mixture was warmed to room temperature and stirring continued for 30 min. sat.  $\text{NH}_4\text{Cl}$  solution (3 mL) and EtOAc (30 mL) were added, the layers were separated and the aqueous phase was extracted with EtOAc (2 x 30 mL). The combined organic layers were washed with brine and dried over  $\text{MgSO}_4$ . The solvent was removed under reduced pressure and the crude product was purified by flash chromatography (silica, hexanes/EtOAc 2:1 – 1:1) to yield the title compound as a pale yellow amorphous solid (72 mg, 32%). <sup>1</sup>H NMR (400 MHz,  $\text{CDCl}_3$ )  $\delta$  7.75 (d,  $J$  = 8.4 Hz, 2H), 7.32 (d,  $J$  = 7.9 Hz, 2H), 5.75 (ddt,  $J$  = 17.1, 10.0, 6.5 Hz, 1H), 5.32 – 5.22 (m, 2H), 4.10 (s, 2H), 3.82 (dt,  $J$  = 6.4, 1.2 Hz, 2H), 2.43 (s, 3H), 1.45 (br, 1H), 1.27 (s, 6H). <sup>13</sup>C NMR (101 MHz,  $\text{CDCl}_3$ )  $\delta$  143.7, 136.4, 132.1, 129.7, 128.1, 120.0, 90.6, 74.8, 64.9, 49.2, 36.1, 31.2, 21.6. IR (neat)  $\tilde{\nu}$  3510, 2981, 2929, 1598, 1160  $\text{cm}^{-1}$ . HRMS (ESI<sup>+</sup>) for  $\text{C}_{16}\text{H}_{22}\text{NO}_3\text{S}$  [M+Na]<sup>+</sup>: calcd: 308.1315, found: 308.1316.

**4-Methyl-4-((triethylsilyloxy)pent-2-yn-1-ol (S31).**

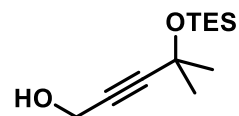

*n*-BuLi (1.6 M in hexanes, 1.57 mL, 2.5 mmol) was added at 0 °C to a solution of alkyne **S4** (500 mg, 2.5 mmol) in THF (10 mL). The mixture was stirred for 1 h at this temperature before powdered paraformaldehyde (90 mg, 3.0 mmol) was slowly introduced and stirring was continued overnight at ambient temperature. The reaction was quenched with sat.  $\text{NH}_4\text{Cl}$  solution (10 mL). The aqueous phase was extracted with  $\text{Et}_2\text{O}$  (3 x 40 mL) and the combined organic layers were washed with sat. NaCl solution, dried over  $\text{Na}_2\text{SO}_4$  and concentrated under vacuum. The crude product was purified by flash chromatography (silica, hexanes/EtOAc 9:1) to give the title compound as a colorless oil (529 mg, 92%). <sup>1</sup>H NMR (400 MHz,  $\text{CDCl}_3$ )  $\delta$  4.28 (d,  $J$  = 6.2 Hz, 2H), 1.42 (t,  $J$  = 6.2 Hz, 1H), 0.97 (t,  $J$  = 7.9 Hz, 9H), 0.74 –

0.62 (m, 6H).  $^{13}\text{C}$  NMR (101 MHz,  $\text{CDCl}_3$ )  $\delta$  91.4, 80.4, 66.3, 51.4, 33.1, 7.1, 6.2. IR (film)  $\tilde{\nu}$  3340, 2955, 2876, 1377, 1239, 1160, 1035, 1002, 724  $\text{cm}^{-1}$ . HRMS (ESI $^+$ ) for  $\text{C}_{12}\text{H}_{24}\text{O}_2\text{Si}$   $[\text{M}+\text{Na}]^+$ : calcd: 251.1438, found: 251.1436.

**2-Methylnon-8-en-3-yn-2-ol (S32).** *n*-BuLi (1.6 M in hexanes, 19.3 mL, 30.1 mmol) was added at 0 °C to a

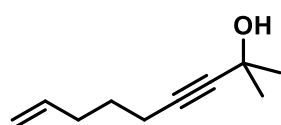

solution of 2-methyl-3-buten-2-ol (1.50 mL, 15.5 mmol) in THF (45 mL) and HMPA (18 mL). After 1 h at 0 °C, the reaction mixture was cooled to -78 °C and 5-bromo-1-pentene (1.53 mL, 12.9 mmol) was slowly introduced. The mixture was warmed to room temperature during 1 h and then stirred at 70 °C for another

18 h. The mixture was cooled to room temperature and the reaction quenched with sat.  $\text{NH}_4\text{Cl}$  solution (50 mL). The aqueous phase was extracted with  $\text{Et}_2\text{O}$  (3 x 40 mL) and the combined organic layers were washed with sat. NaCl solution, dried over  $\text{Na}_2\text{SO}_4$  and concentrated under reduced pressure. The residue was purified by flash chromatography (silica, hexanes/ $\text{EtOAc}$  5:1) to give the title compound as a colorless oil (1.54 g, 78%)  $^1\text{H}$  NMR (400 MHz,  $\text{CDCl}_3$ )  $\delta$  5.79 (ddt,  $J$  = 17.0, 10.2, 6.7 Hz, 1H), 5.08 – 4.95 (m, 2H), 2.19 (t,  $J$  = 7.1 Hz, 2H), 2.17 – 2.10 (m, 2H), 1.86 (s, 1H), 1.63 – 1.55 (m, 1H), 1.50 (s, 6H).  $^{13}\text{C}$  NMR (101 MHz,  $\text{CDCl}_3$ )  $\delta$  137.9, 115.1, 85.4, 82.2, 65.3, 32.8, 31.7, 27.8, 18.0. IR (film)  $\tilde{\nu}$  3331, 2980, 2933, 1641, 1439, 1364, 1240, 1163, 1133, 1083, 950, 912, 838  $\text{cm}^{-1}$ . HRMS (ESI $^+$ ) for  $\text{C}_{10}\text{H}_{16}\text{O}$   $[\text{M}+\text{Na}]^+$ : calcd: 175.1093, found: 175.1094.

**N-(4-(1-Methoxycyclohexyl)but-3-yn-1-yl)-4-methylbenzenesulfonamide (S33).** *n*-BuLi (1.6 M in hexanes,

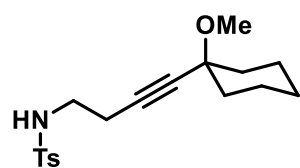

2.0 mL, 3.2 mmol) was slowly added to a solution of alkyne **S1** (400 mg, 2.9 mmol) in THF (5.0 mL) at 0 °C. A solution of *N*-tosylaziridine (428 mg, 2.2 mmol) in THF (3.3 mL) and DMPU (0.9 mL) was slowly added and the mixture was stirred at room temperature for 3 h. sat.  $\text{NH}_4\text{Cl}$  solution (2 mL), water (2 mL) and  $\text{EtOAc}$  (20 mL) were introduced before the layers were

separated. The aqueous phase was extracted with  $\text{EtOAc}$  (2 x 50 mL) and the combined organic layers were washed with brine and dried over  $\text{MgSO}_4$ . The solvent was removed under reduced pressure and the crude product was purified by flash chromatography (silica, hexanes/ $\text{EtOAc}$  5:1 – 4:1 – 3:1) to give the title compound as a colorless oil (405 mg, 56%).  $^1\text{H}$  NMR (400 MHz,  $\text{CDCl}_3$ )  $\delta$  7.77 – 7.73 (m, 2H), 7.34 – 7.29 (m, 2H), 4.71 (t,  $J$  = 6.3 Hz, 1H), 3.28 (s, 3H), 3.10 (q,  $J$  = 6.5 Hz, 2H), 2.45 – 2.39 (m, 5H), 1.84 – 1.74 (m, 2H), 1.68 – 1.57 (m, 2H), 1.57 – 1.36 (m, 5H), 1.34 – 1.23 (m, 1H).  $^{13}\text{C}$  NMR (101 MHz,  $\text{CDCl}_3$ )  $\delta$  143.7, 137.1, 129.9, 127.2, 84.0, 81.9, 74.0, 50.7, 42.2, 36.9, 25.5, 22.9, 21.7, 20.1. IR (film)  $\tilde{\nu}$  3283 (br), 2933, 2857, 1446, 1090  $\text{cm}^{-1}$ . HRMS (ESI $^+$ ) for  $\text{C}_{18}\text{H}_{25}\text{NO}_3\text{S}$   $[\text{M}+\text{Na}]^+$ : calcd: 358.1447, found: 358.1444.

**1-((*tert*-Butyldimethylsilyl)oxy)propan-2-one (S34).** Imidazole (1.0 g, 14.8 mmol) was added in portions

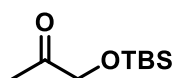

to a stirred solution of hydroxyacetone (90%, 555 mg, 6.7 mmol) and TBSCl (1.53 g, 10.1 mmol) in  $\text{CH}_2\text{Cl}_2$  (26 mL) at 0 °C. The mixture was stirred at room temperature for 1 h before brine (10 mL) was added. The layers were separated, the aqueous phase was

extracted with  $\text{CH}_2\text{Cl}_2$  (2 x 50 mL) and the combined organic layers were dried over  $\text{MgSO}_4$ . The solvent was evaporated and the crude product purified by flash chromatography (silica, pentane/ $\text{Et}_2\text{O}$  20:1 – 10:1) to give the title compound as a colorless oil (1.1 g, 88%).  $^1\text{H}$  NMR (400 MHz,  $\text{CDCl}_3$ )  $\delta$  4.14 (s, 2H), 2.17 (s,

3H), 0.92 (s, 9H), 0.09 (s, 6H).  $^{13}\text{C}$  NMR (101 MHz,  $\text{CDCl}_3$ )  $\delta$  209.4, 69.7, 26.1, 25.9, 18.4, -5.4. The spectral data is consistent with previously reported values.<sup>[21]</sup>

**N-(5-((*tert*-Butyldimethylsilyloxy)-4-hydroxy-4-methylpent-2-yn-1-yl)-4-methyl-N-(3-methylbut-2-en-1-yl)benzenesulfonamide (S35).** *n*-BuLi (1.6 M in hexanes, 1.46 mL, 2.34 mmol) was slowly added to a solution of alkyne **S14** (500 mg, 1.80 mmol) in THF (19.0 mL) at 0 °C. The solution was stirred for 20 min at 0 °C before ketone **S34** (509 mg, 2.7 mmol) was introduced.

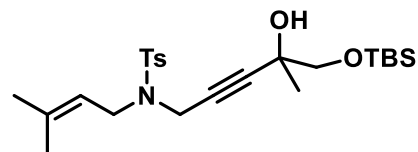

The mixture was warmed to room temperature and stirred for 5 min before sat.  $\text{NH}_4\text{Cl}$  solution (10 mL) and EtOAc (50 mL) were introduced. The aqueous phase was extracted with EtOAc (2 x 50 mL) and the combined organic layers were washed with brine and dried over  $\text{MgSO}_4$ . The solvent was evaporated and the residue purified by flash chromatography (silica, hexanes/EtOAc 10:1 – 6:1 – 4:1) to yield the title compound as a colorless oil (503 mg, 60%).  $^1\text{H}$  NMR (400 MHz,  $\text{CDCl}_3$ )  $\delta$  7.77 – 7.70 (m, 2H), 7.32 – 7.27 (m, 2H), 5.11 (tdq,  $J = 7.2, 2.9, 1.4$  Hz, 1H), 4.09 (s, 2H), 3.81 (d,  $J = 7.3$  Hz, 2H), 3.40 (d,  $J = 9.5$  Hz, 1H), 3.29 (d,  $J = 9.4$  Hz, 1H), 2.51 (br, 1H), 2.42 (s, 3H), 1.72 (d,  $J = 1.3$  Hz, 3H), 1.68 (d,  $J = 1.3$  Hz, 3H), 1.15 (s, 3H), 0.89 (s, 9H), 0.06 (s, 6H).  $^{13}\text{C}$  NMR (101 MHz,  $\text{CDCl}_3$ )  $\delta$  143.4, 139.0, 136.6, 129.6, 128.0, 118.2, 87.7, 76.5, 70.8, 67.8, 44.0, 35.8, 26.0, 26.0, 25.2, 21.7, 18.5, 18.1, -5.2, -5.3. IR (film)  $\tilde{\nu}$  3513 (br), 2929, 2858, 1347, 1160, 1093  $\text{cm}^{-1}$ . HRMS (ESI<sup>+</sup>) for  $\text{C}_{24}\text{H}_{39}\text{NO}_4\text{SSi}$  [ $\text{M}+\text{Na}$ ]<sup>+</sup>: calcd: 488.2261, found: 488.2264.

**4-Methyl-N-(3-methylbut-2-en-1-yl)-N-(4-oxopent-2-yn-1-yl)benzenesulfonamide (S36).** *n*-BuLi (1.6 M in hexanes, 1.46 mL, 2.34 mmol) was slowly added to a solution of alkyne **S14** (500 mg, 1.80 mmol) in THF (19.0 mL) at 0 °C. The solution was stirred for 20 min at 0 °C before *N*-methoxy-*N*-methylacetamide (0.29 mL, 2.7 mmol) was introduced. After reaching room temperature, the mixture was stirred for 5 min before sat.  $\text{NH}_4\text{Cl}$  solution (10 mL) and EtOAc (50 mL) were added. The layers were separated, the aqueous phase was extracted with EtOAc (2 x 50 mL), and the combined organic layers were washed with brine and dried over  $\text{MgSO}_4$ . The solvent was removed under reduced pressure and the crude product was purified by flash chromatography (silica, hexanes/EtOAc 10:1 – 6:1 – 4:1) to yield the title compound as a yellow oil (248 mg, 43%).  $^1\text{H}$  NMR (400 MHz,  $\text{CDCl}_3$ )  $\delta$  7.76 – 7.71 (m, 2H), 7.36 – 7.29 (m, 2H), 5.10 (tdq,  $J = 7.1, 2.8, 1.4$  Hz, 1H), 4.21 (s, 2H), 3.82 (d,  $J = 7.3$  Hz, 2H), 2.42 (s, 3H), 2.08 (s, 3H), 1.73 (d,  $J = 1.3$  Hz, 3H), 1.66 (d,  $J = 1.3$  Hz, 3H).  $^{13}\text{C}$  NMR (101 MHz,  $\text{CDCl}_3$ )  $\delta$  183.3, 144.0, 139.9, 135.8, 129.8, 127.9, 117.6, 84.9, 84.6, 44.6, 35.7, 32.4, 26.0, 21.7, 18.0. IR (film)  $\tilde{\nu}$  2974, 2921, 2209, 1679, 1348, 1162  $\text{cm}^{-1}$ . HRMS (ESI<sup>+</sup>) for  $\text{C}_{17}\text{H}_{21}\text{NO}_3\text{S}$  [ $\text{M}+\text{Na}$ ]<sup>+</sup>: calcd: 342.1134, found: 342.1135.

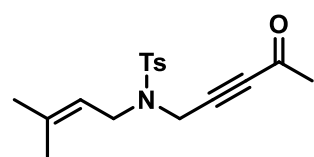

**N-(4-Hydroxyhex-2-yn-1-yl)-4-methyl-N-(3-methylbut-2-en-1-yl)benzenesulfonamide (S37).** *n*-BuLi (1.6 M in hexanes, 1.35 mL, 2.16 mmol) was added slowly to a solution of alkyne **S14** (460 mg, 1.66 mmol) in THF (17.5 mL) at 0 °C. The solution was stirred for 30 min at 0 °C before freshly distilled propionaldehyde (1.20 mL, 16.6 mmol) was introduced. Stirring was continued at room temperature for 30 min before sat.  $\text{NH}_4\text{Cl}$  solution (3 mL) and EtOAc (30 mL) were added. The layers were separated and the aqueous phase was extracted with EtOAc (2 x 30 mL). The combined organic layers were washed with brine and dried over  $\text{MgSO}_4$ , the solvent was removed under reduced pressure and the crude product

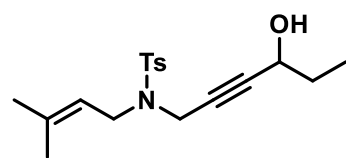



was purified by flash chromatography (silica, hexanes/EtOAc 8:1 – 4:1 – 3:1) to yield the title compound as a light yellow oil which was directly used in the subsequent step.

**N-(4-Hydroxybut-2-yn-1-yl)-4-methyl-N-(3-methylbut-2-en-1-yl)benzenesulfonamide (S38).** *n*-BuLi

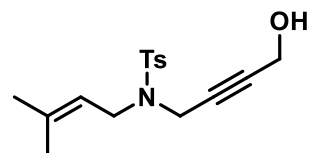

(1.6 M in hexanes, 0.59 mL, 0.94 mmol) was slowly added to a solution of alkyne **S14** (200 mg, 0.72 mmol) in THF (7.6 mL) at  $-78^{\circ}\text{C}$ . The solution was stirred for 3 h at  $-78^{\circ}\text{C}$  before powdered paraformaldehyde (28 mg, 0.94 mmol) was introduced. After stirring at room temperature for 1 h, sat.  $\text{NH}_4\text{Cl}$  solution (3 mL) and EtOAc (30 mL) were added, the layers were separated and the aqueous phase was extracted with EtOAc (2 x 30 mL). The combined organic layers were washed with brine and dried over  $\text{MgSO}_4$ . The solvent was removed under reduced pressure and the crude product was purified by flash chromatography (silica, hexanes/EtOAc 10:1 – 4:1 – 2:1) to yield the title compound as a light yellow oil (159 mg, 72%).  $^1\text{H}$  NMR (400 MHz,  $\text{CDCl}_3$ )  $\delta$  7.77 – 7.72 (m, 2H), 7.34 – 7.28 (m, 2H), 5.10 (tdq,  $J = 7.2, 2.9, 1.4$  Hz, 1H), 4.07 (t,  $J = 2.0$  Hz, 2H), 3.97 (dt,  $J = 6.1, 2.0$  Hz, 2H), 3.80 (d,  $J = 7.3$  Hz, 2H), 2.43 (s, 3H), 1.72 (d,  $J = 1.2$  Hz, 3H), 1.67 (d,  $J = 1.2$  Hz, 3H).  $^{13}\text{C}$  NMR (101 MHz,  $\text{CDCl}_3$ )  $\delta$  143.6, 139.2, 136.4, 129.4, 128.1, 118.0, 83.5, 79.2, 50.9, 44.2, 35.8, 26.0, 21.7, 18.0. The spectral data is consistent with previously reported values.<sup>[22]</sup>

**1-(1-Methoxycyclohexyl)-7-methyloct-6-en-1-yn-3-ol (S39).** *n*-BuLi (1.6 M in hexanes, 3.6 mL, 5.8 mmol)

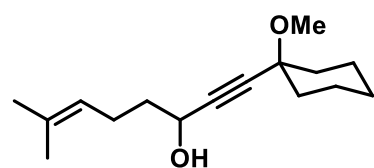

was slowly added to a solution of alkyne **S1** (800 mg, 5.8 mmol) in THF (47 mL) at  $0^{\circ}\text{C}$ . The mixture was stirred for 30 min at  $0^{\circ}\text{C}$  before a solution of the freshly distilled aldehyde **S15** (500 mg, 4.5 mmol) in THF (3 mL) was introduced. After warming to room temperature, the mixture was stirred for 10 min before water (5 mL) and EtOAc (50 mL) were added. The layers were separated and the aqueous phase was extracted with EtOAc (2 x 50 mL). The combined organic layers were dried over  $\text{MgSO}_4$  and the solvent was removed under reduced pressure. The crude product was purified by flash chromatography (silica, hexanes/EtOAc 20:1 – 10:1 – 7:1 – 5:1) to yield the title compound as a colorless oil (647 mg, 58%).  $^1\text{H}$  NMR (400 MHz,  $\text{CDCl}_3$ )  $\delta$  5.14 (tdq,  $J = 7.2, 2.9, 1.4$  Hz, 1H), 4.44 (t,  $J = 6.5$  Hz, 1H), 3.35 (s, 3H), 2.27 – 2.08 (m, 2H), 1.93 – 1.83 (m, 2H), 1.81 – 1.67 (m, 2H), 1.70 (q,  $J = 4.0$  Hz, 3H), 1.70 – 1.62 (m, 2H), 1.63 (s, 3H), 1.61 – 1.46 (m, 5H), 1.35 – 1.23 (m, 1H).  $^{13}\text{C}$  NMR (101 MHz,  $\text{CDCl}_3$ )  $\delta$  132.8, 123.4, 87.2, 86.1, 74.0, 62.4, 50.8, 38.2, 36.9, 36.8, 25.9, 25.6, 24.0, 23.0, 17.8. IR (film)  $\tilde{\nu}$  3416 (br), 2933, 2857, 1446, 1079  $\text{cm}^{-1}$ . HRMS (ESI<sup>+</sup>) for  $\text{C}_{16}\text{H}_{26}\text{O}_2$   $[\text{M}+\text{Na}]^+$ : calcd: 273.1825, found: 273.1823.

**Dimethyl 2-(3-methylbut-2-en-1-yl)-2-(prop-2-yn-1-yl)malonate (S40).**  $\text{Cs}_2\text{CO}_3$  (1.45 g, 4.5 mmol) and 1-

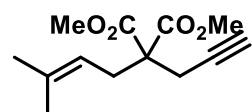

bromo-3-methyl-2-butene (0.67 mL, 5.8 mmol) were added to a solution of malonate **S3** (330 mg, 1.9 mmol) in acetone (12.8 mL). The mixture was stirred at reflux temperature for 18 h before it was allowed to cool to room temperature. After dilution with *tert*-butyl methyl ether (40 mL), the mixture was filtered through a pad of Celite and the filter cake was washed with *tert*-butyl methyl ether (100 mL). The combined filtrates were evaporated and the crude product was purified by flash chromatography (silica, hexanes/*tert*-butyl methyl ether 1:0 – 20:1 – 10:1 – 6:1) to give the title compound as a colorless oil (412 mg, 89%).  $^1\text{H}$  NMR (400 MHz,  $\text{CDCl}_3$ )

$\delta$  4.89 (tdq,  $J = 7.3, 2.9, 1.4$  Hz, 1H), 3.73 (s, 6H), 2.80 – 2.76 (m, 4H), 2.00 (t,  $J = 2.7$  Hz, 1H), 1.70 (q,  $J = 1.2$  Hz, 3H), 1.66 – 1.64 (m, 3H).  $^{13}\text{C}$  NMR (101 MHz,  $\text{CDCl}_3$ )  $\delta$  170.6, 137.1, 117.1, 79.4, 71.3, 57.3, 52.9, 30.9, 26.2, 22.7, 18.1. The spectral data is consistent with previously reported values.<sup>[23]</sup>

**Dimethyl 2-(3-(1-hydroxycyclohexyl)prop-2-yn-1-yl)-2-(3-methylbut-2-en-1-yl)malonate (S41).** LiHMDS

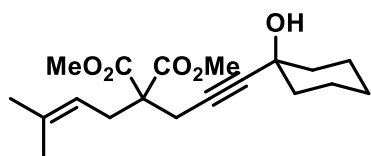

(1 M in THF, 1.0 mL, 1.0 mmol) was slowly added to a solution of alkyne **S40** (200 mg, 0.84 mmol) in THF (8.2 mL) at  $-78$  °C and the resulting mixture was stirred for 30 min at that temperature. Cyclohexanone (0.13 mL, 1.26 mmol) was slowly added at  $-78$  °C and the resulting mixture warmed to room temperature. After 5 min, sat.  $\text{NH}_4\text{Cl}$  solution (1 mL) and EtOAc (20 mL) were added and the layers were separated. The aqueous phase was extracted with EtOAc (3 x 30 mL) and the combined organic layers were washed with brine and dried over  $\text{MgSO}_4$ . The solvent was removed under reduced pressure and the residue was purified by flash chromatography (silica, hexanes/EtOAc 20:1 – 10:1 – 5:1) to give the title compound as a colorless oil (189 mg, 67%).  $^1\text{H}$  NMR (400 MHz,  $\text{CDCl}_3$ )  $\delta$  4.90 (tp,  $J = 7.7, 1.5$  Hz, 1H), 3.72 (s, 6H), 2.79 (s, 2H), 2.76 (d,  $J = 7.7$  Hz, 2H), 1.87 – 1.72 (m, 5H), 1.70 (d,  $J = 1.4$  Hz, 3H), 1.65 (d,  $J = 1.4$  Hz, 3H), 1.58 – 1.44 (m, 5H), 1.23 – 1.13 (m, 1H).  $^{13}\text{C}$  NMR (101 MHz,  $\text{CDCl}_3$ )  $\delta$  170.7, 136.9, 117.2, 87.1, 79.6, 68.9, 57.6, 52.8, 40.2, 31.0, 26.2, 25.3, 23.5, 22.9, 18.1. IR (film)  $\tilde{\nu}$  3468 (br), 2933, 2858, 1732, 1437  $\text{cm}^{-1}$ . HRMS (ESI<sup>+</sup>) for  $\text{C}_{19}\text{H}_{28}\text{O}_5$   $[\text{M}+\text{Na}]^+$ : calcd: 359.1829, found: 359.1829.

**4-((tert-Butyldimethylsilyl)oxy)butan-2-one (S42).** Imidazole (3.2 g, 47.1 mmol) was added in portions to

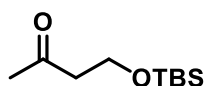

a stirred solution of 4-hydroxy-2-butanone (90%, 2.1 g, 21.5 mmol) and TBSCl (4.85 g, 32.2 mmol) in  $\text{CH}_2\text{Cl}_2$  (83 mL) at 0 °C. The mixture was stirred at room temperature for 1 h before brine (20 mL) was added and the layers were separated. The aqueous phase was extracted with  $\text{CH}_2\text{Cl}_2$  (2 x 100 mL) and the combined organic layers were dried over  $\text{MgSO}_4$ . The solvent was removed under reduced pressure and the crude product was purified by flash chromatography (silica, pentane/Et<sub>2</sub>O 20:1 – 10:1) to give the title compound as a colorless oil (4.05 mg, 93%).  $^1\text{H}$  NMR (400 MHz,  $\text{CDCl}_3$ )  $\delta$  3.88 (t,  $J = 6.3$  Hz, 1H), 2.61 (t,  $J = 6.3$  Hz, 1H), 2.18 (s, 1H), 0.87 (s, 4H), 0.05 (s, 3H).  $^{13}\text{C}$  NMR (101 MHz,  $\text{CDCl}_3$ )  $\delta$  208.2, 59.0, 46.7, 31.0, 26.0, 18.4, -5.3. The spectral data is consistent with previously reported values.<sup>[24]</sup>

**1-((tert-Butyldimethylsilyl)oxy)-3-methyltridec-4-yn-3-ol (S43).** *n*-BuLi (1.6 M in hexanes, 7.04 mL,

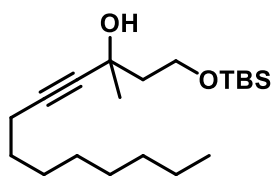

11.3 mmol) was slowly added to a solution of 1-decyne (2.03 mL, 11.3 mmol) in THF (100 mL) at 0 °C. The solution was stirred for 20 min at 0 °C before ketone **S42** (1.9 g, 9.4 mmol) was introduced. After stirring at room temperature for 20 min, aq. sat.  $\text{NH}_4\text{Cl}$  (10 mL) and *tert*-butyl methyl ether (100 mL) were added. The layers were separated and the aqueous phase was extracted with *tert*-butyl methyl ether (2 x 100 mL). The combined organic layers were washed with brine and dried over  $\text{MgSO}_4$ . The solvent was evaporated and the crude product was purified by flash chromatography (silica, hexanes/EtOAc 1:0 – 20:1) to yield the title compound as a colorless oil (2.65 g, 83%).  $^1\text{H}$  NMR (400 MHz,  $\text{CDCl}_3$ )  $\delta$  4.53 (br, 1H), 4.23 (ddd,  $J = 10.8, 10.0, 3.1$  Hz, 1H), 3.87 (ddd,  $J = 10.1, 4.5, 3.4$  Hz, 1H), 2.20 (t,  $J = 7.1$  Hz, 2H), 1.95 (ddd,  $J = 14.1, 10.8, 4.5$  Hz, 1H), 1.69 (dt,  $J = 14.1, 3.2$  Hz, 1H), 1.56 – 1.45 (m, 2H), 1.46 (s, 3H), 1.42 – 1.33 (m, 2H), 1.33 – 1.22 (m, 8H), 0.91 (s, 9H), 0.88 (t,  $J = 7.1$  Hz, 3H), 0.11 (s, 3H), 0.09 (s,

3H).  $^{13}\text{C}$  NMR (101 MHz,  $\text{CDCl}_3$ )  $\delta$  84.1, 83.5, 68.8, 62.1, 43.6, 32.0, 30.9, 29.4, 29.3, 29.1, 29.0, 26.0, 22.8, 18.9, 18.3, 14.3, -5.4, -5.5. IR (film)  $\tilde{\nu}$  3503 (br), 2954, 2928, 2856, 1255, 1093  $\text{cm}^{-1}$ . HRMS (ESI $^+$ ) for  $\text{C}_{20}\text{H}_{40}\text{O}_2\text{Si}$   $[\text{M}+\text{Na}]^+$ : calcd: 363.2690, found: 363.2691.

***tert*-Butyl((3-methoxy-3-methyltridec-4-yn-1-yl)oxy)dimethylsilane (S44).** A solution of alcohol **S43**

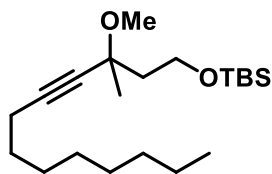

(1.8 g, 5.3 mmol) in THF (5 mL) was added to a stirred suspension of NaH (317 mg, 13.2 mmol) in THF (23 mL) at 0 °C. The mixture was stirred for 10 min at room temperature before MeI (1.66 mL, 26.4 mmol) was added. After stirring for 1 h at room temperature, sat.  $\text{NH}_4\text{Cl}$  solution (10 mL), water (10 mL) and *tert*-butyl methyl ether (60 mL) were added to the mixture and the layers were separated.

The aqueous phase was extracted with *tert*-butyl methyl ether (2 x 100 mL) and the combined organic layers were washed with brine and dried over  $\text{MgSO}_4$ . The solvent was evaporated and the crude product purified by flash chromatography (silica, hexanes/EtOAc 1:0 – 20:1) to give the title compound as a colorless oil (1.77 g, 94%).  $^1\text{H}$  NMR (400 MHz,  $\text{CDCl}_3$ )  $\delta$  3.80 (ddd,  $J$  = 7.9, 6.6, 1.1 Hz, 2H), 3.31 (s, 3H), 2.20 (t,  $J$  = 7.0 Hz, 2H), 1.99 – 1.84 (m, 2H), 1.54 – 1.46 (m, 2H), 1.42 – 1.34 (m, 2H), 1.39 (s, 3H), 1.34 – 1.21 (m, 8H), 0.89 (s, 9H), 0.88 (t,  $J$  = 7.0 Hz, 3H), 0.06 (s, 6H).  $^{13}\text{C}$  NMR (101 MHz,  $\text{CDCl}_3$ )  $\delta$  86.2, 80.8, 72.5, 60.0, 51.2, 44.2, 32.0, 29.4, 29.2, 29.0, 28.9, 26.6, 26.1, 22.8, 18.8, 18.5, 14.3, -5.1, -5.1. IR (film)  $\tilde{\nu}$  2955, 2928, 2856, 1463, 1254, 1079  $\text{cm}^{-1}$ . HRMS (ESI $^+$ ) for  $\text{C}_{21}\text{H}_{42}\text{O}_2\text{Si}$   $[\text{M}+\text{Na}]^+$ : calcd: 377.2846, found: 377.2846.

**3-Methoxy-3-methyltridec-4-yn-1-ol (S45).** TBAF (1 M in THF) was added to a solution of silyl ether **S44**

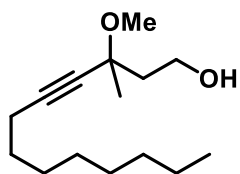

(1.77 g, 4.98 mmol) in THF (32 mL) at room temperature. The mixture was stirred for 1 h before sat.  $\text{NH}_4\text{Cl}$  solution (5 mL), water (5 mL) and EtOAc (30 mL) were introduced. The aqueous phase was extracted with EtOAc (2 x 80 mL) and the combined organic layers were washed with brine and dried over  $\text{MgSO}_4$ . The solvent was evaporated and the residue was purified by flash chromatography (silica,

hexanes/EtOAc 10:1 – 4:1) to give the title compound as a colorless oil (1.03 g, 86%).  $^1\text{H}$  NMR (400 MHz,  $\text{CDCl}_3$ )  $\delta$  3.98 (ddd,  $J$  = 11.6, 8.3, 3.5 Hz, 1H), 3.76 (ddd,  $J$  = 11.3, 6.0, 3.8 Hz, 1H), 3.34 (s, 3H), 2.74 (br, 1H), 2.21 (t,  $J$  = 7.1 Hz, 2H), 1.97 (ddd,  $J$  = 14.4, 8.3, 3.9 Hz, 1H), 1.86 (ddd,  $J$  = 14.4, 6.0, 3.5 Hz, 1H), 1.56 – 1.46 (m, 2H), 1.42 (s, 3H), 1.38 (m, 2H), 1.33 – 1.22 (m, 8H), 0.88 (t,  $J$  = 7.1 Hz, 3H).  $^{13}\text{C}$  NMR (101 MHz,  $\text{CDCl}_3$ )  $\delta$  87.3, 80.2, 75.0, 60.4, 51.3, 44.1, 32.0, 29.3, 29.2, 29.0, 28.9, 26.1, 22.8, 18.7, 14.3. IR (film)  $\tilde{\nu}$  3424 (br), 2927, 2856, 1464, 1078  $\text{cm}^{-1}$ . HRMS (ESI $^+$ ) for  $\text{C}_{15}\text{H}_{28}\text{O}_2$   $[\text{M}+\text{Na}]^+$ : calcd: 263.1981, found: 263.1981.

**3-Methoxy-3-methyltridec-4-ynal (S46).**  $\text{NaHCO}_3$  (874 mg, 10.4 mmol) and Dess-Martin periodinane

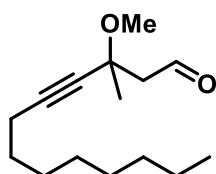

(1.06 g, 2.5 mmol) were added to a solution of alcohol **S45** (500 mg, 2.08 mmol) in wet  $\text{CH}_2\text{Cl}_2$  (19 mL) at 0 °C. The mixture was stirred at room temperature for 30 min before sat.  $\text{Na}_2\text{S}_2\text{O}_3$  solution (7 mL) and water (4 mL) were introduced. The layers were separated, the aqueous phase was extracted with  $\text{CH}_2\text{Cl}_2$  (2 x 60 mL) and the combined organic layers were washed with brine and dried over  $\text{MgSO}_4$ . The solvent was evaporated and the residue purified by flash chromatography (silica, hexanes/EtOAc 10:1). The product was obtained as a colorless oil (421 mg, 85%).  $^1\text{H}$  NMR (400 MHz,  $\text{CDCl}_3$ )  $\delta$  9.85 (t,  $J$  = 2.9 Hz, 1H), 3.37 (s, 3H), 2.64 (dd,  $J$  = 15.3, 3.0 Hz, 1H), 2.58 (dd,  $J$  = 15.3, 2.8 Hz, 1H), 2.22 (t,  $J$  = 7.1 Hz, 2H), 1.51 (m, 2H), 1.47 (s, 3H), 1.42 – 1.33 (m, 2H), 1.27 (m, 8H), 0.88 (t,  $J$  = 7.0 Hz, 3H).  $^{13}\text{C}$  NMR (101 MHz,  $\text{CDCl}_3$ )

$\delta$  201.9, 88.4, 79.5, 70.9, 54.5, 51.6, 32.0, 29.3, 29.2, 29.0, 28.7, 26.5, 22.8, 18.7, 14.3. IR (film)  $\tilde{\nu}$  2928, 2856, 1726, 1463, 1075  $\text{cm}^{-1}$ . HRMS (ESI<sup>+</sup>) for  $\text{C}_{15}\text{H}_{26}\text{O}_2$  [M+Na]<sup>+</sup>: calcd: 261.1825, found: 261.1827.

**3-Methylbut-2-en-1-yl 3-(1-hydroxycyclohexyl)propiolate (S47).** LiHMDS (1 M in THF, 1.7 mL, 1.7 mmol)

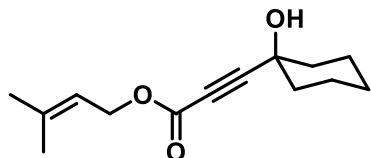

was slowly added to a solution of alkyne **S16** (200 mg, 1.45 mmol) in THF (14.1 mL) at  $-78^\circ\text{C}$  and the resulting mixture was stirred for 30 min at that temperature. Cyclohexanone (0.23 mL, 2.17 mmol) was slowly added at  $-78^\circ\text{C}$  to the mixture allowed to reach room temperature.

After 5 min sat.,  $\text{NH}_4\text{Cl}$  solution (1 mL) and EtOAc (20 mL) were introduced, the layers were separated, the aqueous phase was extracted with EtOAc (3 x 30 mL). The combined organic layers were washed with brine and dried over  $\text{MgSO}_4$ , the solvent was evaporated and the residue was purified by flash chromatography (silica, hexanes/EtOAc 10:1 – 7:1 – 5:1) to give the title compound as a colorless oil (312 mg, 91%). <sup>1</sup>H NMR (400 MHz,  $\text{CDCl}_3$ )  $\delta$  5.30 (tdq,  $J = 7.2, 2.9, 1.4$  Hz, 1H), 4.60 (d,  $J = 7.4$  Hz, 2H), 1.92 – 1.84 (m, 2H), 1.70 (d,  $J = 1.3$  Hz, 3H), 1.65 (d,  $J = 1.3$  Hz, 3H), 1.65 – 1.41 (m, 7H), 1.28 – 1.15 (m, 1H). <sup>13</sup>C NMR (101 MHz,  $\text{CDCl}_3$ )  $\delta$  153.7, 140.4, 117.6, 90.3, 76.0, 68.5, 62.9, 39.1, 25.8, 24.9, 22.8, 18.1. IR (film)  $\tilde{\nu}$  3401 (br), 2935, 2860, 2227, 1709, 1228  $\text{cm}^{-1}$ . HRMS (ESI<sup>+</sup>) for  $\text{C}_{14}\text{H}_{20}\text{O}_3$  [M+Na]<sup>+</sup>: calcd: 259.1346, found: 259.1304.

**Dimethyl 2-(4-methylpent-3-en-1-yl)-2-(prop-2-yn-1-yl)malonate (S48).**  $\text{Cs}_2\text{CO}_3$  (3.4 g, 10.5 mmol) and 5-

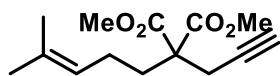

bromo-2-methyl-2-pentene (1.40 mL, 10.5 mmol) were added to a solution of malonate **S3** (594 mg, 3.5 mmol) in acetone (23.1 mL). The mixture was stirred at reflux temperature for 18 h before it was cooled to room temperature and

diluted with *tert*-butyl methyl ether (40 mL). The mixture was filtered through a pad of Celite and the filter cake was washed with *tert*-butyl methyl ether (100 mL). The combined filtrates were evaporated and the residue was purified by flash chromatography (silica, hexanes/*tert*-butyl methyl ether 40:1 – 20:1 – 15:1 – 10:1) to give the title compound as a colorless oil (740 mg, 84%). <sup>1</sup>H NMR (400 MHz,  $\text{CDCl}_3$ )  $\delta$  5.09 (tdq,  $J = 6.9, 2.6, 1.3$  Hz, 1H), 3.73 (s, 6H), 2.85 (d,  $J = 2.7$  Hz, 2H), 2.12 – 2.06 (m, 2H), 2.00 (t,  $J = 2.7$  Hz, 1H), 1.93 – 1.85 (m, 2H), 1.67 (q,  $J = 1.3$  Hz, 3H), 1.58 (d,  $J = 1.5$  Hz, 3H). <sup>13</sup>C NMR (101 MHz,  $\text{CDCl}_3$ )  $\delta$  170.8, 133.0, 122.9, 79.0, 71.4, 56.8, 52.9, 32.2, 25.8, 23.0, 22.9, 17.7. The spectral data is consistent with previously reported values.<sup>[25]</sup>

**Dimethyl 2-(3-(1-hydroxycyclohexyl)prop-2-yn-1-yl)-2-(4-methylpent-3-en-1-yl)malonate (S49).** LiHMDS

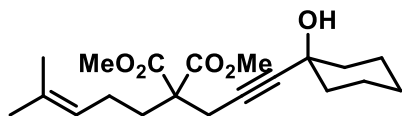

(1 M in THF, 1.9 mL, 1.9 mmol) was slowly added to a solution of alkyne **S48** (400 mg, 1.59 mmol) in THF (15.4 mL) at  $-78^\circ\text{C}$  and the resulting mixture was stirred for 30 min at this temperature.

Cyclohexanone (0.25 mL, 2.38 mmol) was slowly added at  $-78^\circ\text{C}$  and the resulting mixture was warmed to room temperature. After 5 min, sat.  $\text{NH}_4\text{Cl}$  solution (1 mL) and EtOAc (20 mL) were introduced and the layers were separated, the aqueous phase was extracted with EtOAc (3 x 30 mL) and the combined organic layers were washed with brine and dried over  $\text{MgSO}_4$ . The solvent was evaporated and the residue purified by flash chromatography (silica, hexanes/EtOAc 20:1 – 10:1 – 5:1). The product was obtained as a colorless oil (351 mg, 63%). <sup>1</sup>H NMR (400 MHz,  $\text{CDCl}_3$ )  $\delta$  5.08 (tdq,  $J = 7.1, 2.8, 1.4$  Hz, 1H), 3.72 (s, 6H), 2.87 (s, 2H), 2.11 – 2.03 (m, 2H), 1.93 – 1.77 (m, 5H), 1.70 – 1.63 (m, 5H), 1.58

(d,  $J = 1.4$  Hz, 3H), 1.50 (qd,  $J = 10.6, 9.6, 3.2$  Hz, 5H), 1.25 – 1.13 (m, 1H).  $^{13}\text{C}$  NMR (101 MHz,  $\text{CDCl}_3$ )  $\delta$  171.0, 132.9, 123.0, 87.1, 79.2, 68.9, 57.2, 52.8, 40.3, 32.3, 25.8, 25.3, 23.5, 23.2, 22.9, 17.7. IR (film)  $\tilde{\nu}$  3498 (br), 2933, 2857, 1733, 1438, 1171  $\text{cm}^{-1}$ . HRMS (ESI $^+$ ) for  $\text{C}_{20}\text{H}_{30}\text{O}_5$   $[\text{M}+\text{Na}]^+$ : calcd: 373.1985, found: 373.1983.

### 2,6-Dimethylhexadec-2-en-7-yn-6-ol (S50).

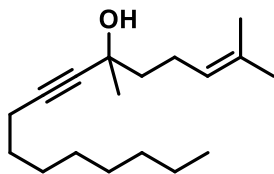

*n*-BuLi (1.6 M in hexanes, 1.78 mL, 2.85 mmol) was slowly added to a solution of 1-decyne (0.51 mL, 2.85 mmol) in THF (25 mL) at 0 °C. The solution was stirred for 20 min at 0 °C before 6-methyl-5-hepten-2-one (300 mg, 2.38 mmol) was introduced. After stirring at room temperature for 20 min, sat.  $\text{NH}_4\text{Cl}$  solution (2 mL) and *tert*-butyl methyl ether (25 mL) were added, the layers were separated and the aqueous phase was extracted with *tert*-butyl methyl ether (2 x 25 mL). The combined organic layers were washed with brine and dried over  $\text{MgSO}_4$ , the solvent was evaporated and the residue purified by flash chromatography (silica, hexanes/EtOAc 20:1 – 10:1) to yield the title compound as a colorless oil (546 mg, 87%).  $^1\text{H}$  NMR (400 MHz,  $\text{CDCl}_3$ )  $\delta$  5.20 – 5.14 (m, 1H), 2.32 – 2.22 (m, 1H), 2.19 (t,  $J = 7.1$  Hz, 2H), 1.85 (br, 1H), 1.69 (q,  $J = 1.3$  Hz, 3H), 1.68 – 1.66 (m, 2H), 1.65 (d,  $J = 1.2$  Hz, 3H), 1.54 – 1.46 (m, 2H), 1.45 (s, 3H), 1.42 – 1.33 (m, 2H), 1.32 – 1.22 (m, 9H), 0.91 – 0.86 (m, 3H).  $^{13}\text{C}$  NMR (101 MHz,  $\text{CDCl}_3$ )  $\delta$  132.4, 124.2, 84.2, 84.0, 68.7, 43.8, 32.0, 30.4, 29.3, 29.2, 29.0, 28.9, 25.9, 24.0, 22.8, 18.8, 17.8, 14.3. IR (film)  $\tilde{\nu}$  3384 (br), 2925, 2856, 1455, 1375  $\text{cm}^{-1}$ . HRMS (ESI $^+$ ) for  $\text{C}_{18}\text{H}_{32}\text{O}$   $[\text{M}+\text{Na}]^+$ : calcd: 287.2345, found: 287.2345.

### 3-(1-Methoxycyclohexyl)prop-2-yn-1-ol (S51).

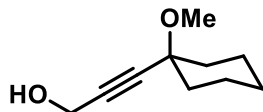

*n*-BuLi (1.6 M in hexanes, 2.94 mL, 4.7 mmol) was slowly added to a solution of alkyne **S1** (500 mg, 3.6 mmol) in THF (38 mL) at 0 °C. The mixture was stirred for 30 min at 0 °C before powdered paraformaldehyde (141 mg, 4.7 mmol) was introduced. After stirring at room temperature for 18 h the reaction was quenched with water (10 mL) and EtOAc (50 mL). The layers were separated and the aqueous phase was extracted with EtOAc (2 x 50 mL). The combined organic layers were dried over  $\text{MgSO}_4$  and the solvent was removed under reduced pressure. The crude product was purified by flash chromatography (silica, hexanes/EtOAc 10:1 – 4:1) to yield the title compound as a colorless oil (371 mg, 61%).  $^1\text{H}$  NMR (400 MHz,  $\text{CDCl}_3$ )  $\delta$  4.33 (s, 2H), 3.35 (s, 3H), 1.92 – 1.83 (m, 2H), 1.70 – 1.44 (m, 8H), 1.37 – 1.23 (m, 1H).  $^{13}\text{C}$  NMR (101 MHz,  $\text{CDCl}_3$ )  $\delta$  87.0, 84.1, 73.9, 51.3, 50.8, 36.7, 25.5, 22.8. IR (film)  $\tilde{\nu}$  3423 (br), 2935, 2858, 1448, 1077  $\text{cm}^{-1}$ . HRMS (ESI $^+$ ) for  $\text{C}_{10}\text{H}_{16}\text{O}_2$   $[\text{M}+\text{Na}]^+$ : calcd: 191.1042, found: 191.1042.

## SUBSTRATES

### 1-Methoxy-1-(7-methyloct-6-en-1-yn-1-yl)cyclohexane (1a).

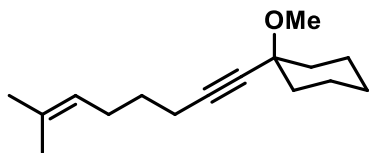

*n*-BuLi (1.6 M in hexanes, 1.08 mL, 1.74 mmol) was slowly added to a solution of alkyne **S1** (200 mg, 1.45 mmol) in THF (5 mL) at 0 °C. The mixture was stirred for 30 min at 0 °C before a solution of alkyl bromide **S13** (307 mg, 1.74 mmol) in THF (3.3 mL) and DMPU (0.9 mL) was added. The mixture was warmed to room temperature and stirring was continued for 18 h. Sat.  $\text{NH}_4\text{Cl}$  solution (2 mL), *tert*-butyl methyl ether (10 mL) and water (2 mL) were added and the layers were

separated. The aqueous phase was extracted with *tert*-butyl methyl ether (3 x 20 mL) and the combined organic layers were washed with brine and dried over MgSO<sub>4</sub>. The solvent was removed under reduced pressure and the residue purified by flash chromatography (silica, hexanes/EtOAc 1:0 – 80:1 – 40:1) to give the product as a colorless oil (183 mg, 54%). <sup>1</sup>H NMR (400 MHz, CDCl<sub>3</sub>) δ 5.10 (tdq, *J* = 7.2, 2.9, 1.5 Hz, 1H), 3.35 (s, 3H), 2.24 (d, *J* = 7.0 Hz, 2H), 2.09 (q, *J* = 7.3 Hz, 2H), 1.90 – 1.81 (m, 2H), 1.69 (q, *J* = 1.3 Hz, 3H), 1.65 – 1.60 (m, 2H), 1.62 (s, 3H), 1.59 – 1.47 (m, 7H), 1.26 (m, 1H). <sup>13</sup>C NMR (101 MHz, CDCl<sub>3</sub>) δ 132.4, 123.8, 86.6, 81.2, 74.2, 50.6, 37.2, 29.3, 27.3, 25.9, 25.7, 23.1, 18.4, 17.8. IR (film)  $\tilde{\nu}$  2932, 2857, 1446, 1092 cm<sup>-1</sup>. HRMS (ESI<sup>+</sup>) for C<sub>16</sub>H<sub>26</sub>O [M+Na]<sup>+</sup>: calcd: 257.1876, found: 257.1877.

**1-(Hept-6-en-1-yn-1-yl)-1-methoxycyclohexane (1b).** *n*-BuLi (2.26 mL, 3.6 mmol, 1.6 M in hexane) was

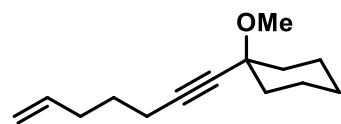

added at 0 °C to a solution of alkyne **S1** (500 mg, 3.6 mmol) in THF (16 mL) and HMPA (7 mL). After stirring for 1 h at 0 °C, the mixture was cooled to –78 °C and 5-bromo-1-pentene (0.24 mL, 1.8 mmol) was slowly introduced.

The mixture was allowed to reach ambient temperature overnight. The reaction was quenched with NH<sub>4</sub>Cl (sat. aq. 20 mL), the aqueous phase was extracted with Et<sub>2</sub>O (3 x 10 mL) and the combined organic layers were washed with brine, dried over Na<sub>2</sub>SO<sub>4</sub> and concentrated under vacuum. The residue was purified by flash chromatography (SiO<sub>2</sub>, 2% EtOAc in hexane) to give the title compound as a colorless oil (370 mg, 88%). <sup>1</sup>H NMR (400 MHz, CDCl<sub>3</sub>): δ 5.80 (ddt, *J* = 16.9, 10.2, 6.7 Hz, 1H), 5.10 – 4.92 (m, 2H), 3.34 (s, 3H), 2.25 (t, *J* = 7.1 Hz, 2H), 2.23 – 2.11 (m, 2H), 1.91 – 1.80 (m, 2H), 1.70 – 1.41 (m, 9H), 1.34 – 1.21 (m, 1H). <sup>13</sup>C NMR (101 MHz, CDCl<sub>3</sub>): δ 138.1, 115.3, 86.1, 81.5, 74.2, 50.6, 37.2, 32.9, 28.3, 25.7, 23.1, 18.2. IR (film)  $\tilde{\nu}$  2935, 2857, 1446, 1292, 1092, 1080, 921, 910 cm<sup>-1</sup>. ESI-MS calcd for C<sub>14</sub>H<sub>22</sub>O [M+Na]<sup>+</sup>: calcd: 229.1563, found: 229.1565.

**1-(1-Methoxycyclohexyl)-7-methyloct-6-en-1-yn-3-one (4).** NaHCO<sub>3</sub> (336 mg, 4.0 mmol) and Dess-Martin

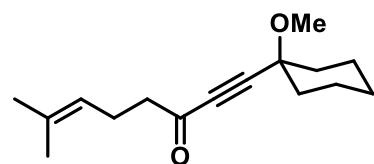

periodinane (508 mg, 1.2 mmol) were added to a solution of alcohol **S39** (200 mg, 0.8 mmol) in wet CH<sub>2</sub>Cl<sub>2</sub> (7.4 mL) at 0 °C. The mixture was stirred at room temperature for 30 min before aq. sat. Na<sub>2</sub>S<sub>2</sub>O<sub>3</sub> (3 mL) and water (3 mL) were introduced. The layers were separated and the aqueous phase was extracted with CH<sub>2</sub>Cl<sub>2</sub> (2 x 20 mL). The combined

organic layers were washed with brine and dried over MgSO<sub>4</sub>. The solvent was evaporated and the residue was purified by flash chromatography (silica, hexanes/EtOAc 1:0 – 30:1 – 20:1) to give the product as a colorless oil (193 mg, 97%). <sup>1</sup>H NMR (400 MHz, CDCl<sub>3</sub>) δ 5.08 (tdq, *J* = 7.2, 2.9, 1.5 Hz, 1H), 3.38 (s, 3H), 2.60 (t, *J* = 7.2 Hz, 2H), 2.36 (q, *J* = 7.5 Hz, 2H), 1.99 – 1.88 (m, 2H), 1.70 – 1.61 (m, 3H), 1.68 (q, *J* = 1.4 Hz, 3H), 1.62 (s, 3H), 1.59 – 1.45 (m, 4H), 1.38 – 1.28 (m, 1H). <sup>13</sup>C NMR (101 MHz, CDCl<sub>3</sub>) δ 187.7, 133.5, 122.1, 93.2, 85.1, 74.0, 51.4, 46.0, 36.2, 25.8, 25.4, 23.0, 22.6, 17.8. IR (film)  $\tilde{\nu}$  2934, 2859, 2204, 1676, 1120 cm<sup>-1</sup>. HRMS (ESI<sup>+</sup>) for C<sub>16</sub>H<sub>24</sub>O<sub>2</sub> [M+Na]<sup>+</sup>: calcd: 271.1668, found: 271.1668.

**4-Methyl-N-(3-methylbut-2-en-1-yl)-N-(3-(trimethylsilyl)prop-2-yn-1-yl)benzenesulfonamide (27a).** *n*-

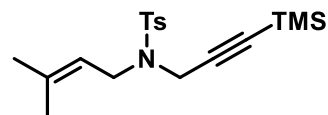

BuLi (1.6 M in hexanes, 1.00 mL, 1.60 mmol) was added to a stirred solution of alkyne **S14** (348 mg, 1.25 mmol) in THF (13.2 mL) at 0 °C and the mixture was stirred for 20 min at that temperature before TMSCl (0.48 mL, 3.76 mmol) was introduced. The mixture was allowed to reach room temperature and stirring was

continued for 30 min before sat.  $\text{NH}_4\text{Cl}$  solution and EtOAc (20 mL) were added. The layers were separated and the aqueous phase was extracted with EtOAc (2 x 20 mL). The combined organic layers were washed with brine and dried over  $\text{MgSO}_4$ . The solvent was evaporated and the residue purified by flash chromatography (silica, hexanes/EtOAc 1:0 – 10:1). The title compound was obtained as a colorless solid (225 mg, 51%).  $^1\text{H}$  NMR (400 MHz,  $\text{CDCl}_3$ )  $\delta$  7.76 – 7.71 (m, 2H), 7.30 – 7.27 (m, 2H), 5.11 (tdq,  $J = 7.1, 2.8, 1.4$  Hz, 1H), 4.08 (s, 2H), 3.81 (d,  $J = 7.2$  Hz, 1H), 2.42 (s, 3H), 1.73 (q,  $J = 1.1$  Hz, 3H), 1.68 – 1.66 (m, 3H), -0.02 (s, 9H).  $^{13}\text{C}$  NMR (101 MHz,  $\text{CDCl}_3$ )  $\delta$  143.3, 139.0, 136.3, 129.6, 128.0, 118.2, 98.6, 90.6, 44.1, 36.5, 26.0, 21.7, 18.0, -0.3. IR (film)  $\tilde{\nu}$  2961, 2926, 2175, 1342, 1161  $\text{cm}^{-1}$ . HRMS (ESI<sup>+</sup>) for  $\text{C}_{18}\text{H}_{27}\text{NO}_2\text{SSi}$  [ $\text{M}+\text{Na}$ ]<sup>+</sup>: calcd 372.1424, found 372.1431.

**4-Methyl-N-(4-methylpent-3-en-1-yl)-N-(3-(trimethylsilyl)prop-2-yn-1-yl)benzenesulfonamide (27b).**

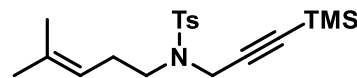

$n\text{-BuLi}$  (1.6 M in hexanes, 1.00 mL, 1.65 mmol) was added to a stirred solution of alkyne **S10** (400 mg, 1.37 mmol) in THF (14.4 mL) at 0 °C. The mixture was stirred for 30 min at that temperature before  $\text{TMSCl}$  (0.52 mL, 4.12 mmol) was introduced. The mixture was allowed to reach room temperature and stirred for 30 min before sat.  $\text{NH}_4\text{Cl}$  solution and EtOAc (20 mL) were added. The layers were separated and the aqueous phase was extracted with EtOAc (2 x 20 mL). The combined organic layers were washed with brine and dried over  $\text{MgSO}_4$ . The solvent was evaporated and the residue purified by flash chromatography (silica, hexanes/EtOAc 20:1). The title compound was obtained as a colorless solid (325 mg, 65%).  $^1\text{H}$  NMR (400 MHz,  $\text{CDCl}_3$ )  $\delta$  7.75 – 7.69 (m, 2H), 7.30 – 7.25 (m, 2H), 5.09 (tdq,  $J = 7.3, 3.0, 1.5$  Hz, 1H), 4.15 (s, 2H), 3.19 – 3.12 (m, 2H), 2.41 (s, 3H), 2.26 (q,  $J = 7.3$  Hz, 2H), 1.69 (q,  $J = 1.3$  Hz, 3H), 1.62 (s, 3H), -0.01 (s, 9H).  $^{13}\text{C}$  NMR (101 MHz,  $\text{CDCl}_3$ )  $\delta$  143.3, 136.2, 134.7, 129.6, 127.9, 120.1, 98.2, 90.9, 46.1, 37.4, 26.8, 25.8, 21.7, 18.0, -0.3. IR (film)  $\tilde{\nu}$  2962, 2922, 2176, 1324, 1161  $\text{cm}^{-1}$ . HRMS (ESI<sup>+</sup>) for  $\text{C}_{19}\text{H}_{29}\text{NO}_2\text{SSi}$  [ $\text{M}+\text{Na}$ ]<sup>+</sup>: calcd 386.1580, found 386.1582.

**N,3-Dimethyl-N-(3-(trimethylsilyl)prop-2-yn-1-yl)but-2-enamide (31).**

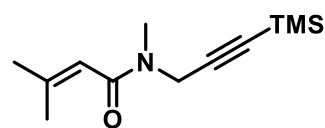

3,3-Dimethylacryloyl chloride (0.81 mL, 7.24 mmol) was added to a stirred solution of *N*-methylpropargylamine (500 mg, 7.24 mmol),  $\text{Et}_3\text{N}$  (2.0 mL, 14.5 mmol) and DMAP (44 mg, 0.36 mmol) in  $\text{CH}_2\text{Cl}_2$  (30 mL) at 0 °C. The mixture was allowed to reach room temperature and stirred for 2 h before water (10 mL) and  $\text{CH}_2\text{Cl}_2$  (20 mL) were added. The layers were separated and the aqueous layer was extracted with  $\text{CH}_2\text{Cl}_2$  (2 x 20 mL). The combined organic layers were washed with brine and dried over  $\text{MgSO}_4$ . The solvent was removed under reduced pressure and the residue purified by flash chromatography (silica, hexanes/EtOAc 4:1 – 2:1) to yield the corresponding amide as a pale yellow oil (931 mg, 85%) which was directly used in the next step.

$\text{LiHMDS}$  (1 M in THF, 3.73 mL, 3.73 mmol) was added to a solution of this amide (460 mg, 3.04 mmol) in THF (30 mL) at -78 °C and the mixture was stirred for 30 min at the same temperature before  $\text{TMSCl}$  (1.16 mL, 9.13 mmol) was added. The mixture was allowed to reach room temperature and stirring was continued for 30 min before sat.  $\text{NH}_4\text{Cl}$  solution (20 mL) and EtOAc (10 mL) were added. The layers were separated and the aqueous phase was extracted with EtOAc (2 x 20 mL). The combined organic layers were washed with brine and dried over  $\text{MgSO}_4$ . The solvent was evaporated and the residue purified by flash chromatography (silica, hexanes/EtOAc 10:1 – 4:1) to give the title compound as a colorless oil (554 mg, 82%).  $^1\text{H}$  NMR (500 MHz,  $\text{CD}_3\text{CN}$ , 70 °C)  $\delta$  5.86 (hept,  $J = 1.4$  Hz, 1H), 4.16 (s (br), 3H), 2.99 (s (br), 3H), 1.89

(d,  $J = 1.3$  Hz, 3H), 1.86 (d,  $J = 1.5$  Hz, 3H), 0.17 (s, 9H).  $^{13}\text{C}$  NMR (500 MHz,  $\text{CD}_3\text{CN}$ , 70 °C)  $\delta$  169.0, 147.8, 119.1, 103.0, 89.4, 37.7, 35.1, 26.4, 20.5, 0.3. IR (film)  $\tilde{\nu}$  2960, 2176, 1627, 1395, 1249  $\text{cm}^{-1}$ . HRMS (EI<sup>+</sup>) for  $\text{C}_{12}\text{H}_{21}\text{NOSi}$  [ $\text{M}+\text{Na}$ ]<sup>+</sup>: calcd 223.1387, found 223.1339.

**5,5,7-Trimethyl-1-(trimethylsilyl)oct-6-en-1-yn-3-one (33).** *n*-BuLi (1.6 M, 1.13 mL, 1.81 mmol) was added

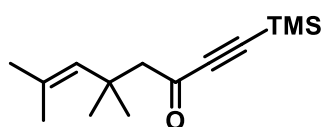

to a solution of trimethylsilylacetylene (207 mg, 2.11 mmol) in THF (6.1 mL) at 0 °C and the resulting mixture was stirred for 30 min at that temperature. A solution of Weinreb amide **18** (300 mg, 1.51 mmol) in THF (1 mL) was added and the mixture was stirred for 1 h at room temperature before sat.

$\text{NH}_4\text{Cl}$  solution was introduced. The mixture was extracted with EtOAc (3 x 50 mL) and the combined organic layers were washed with brine and dried over  $\text{MgSO}_4$ . The solvent was evaporated and the residue purified by flash chromatography (silica, hexanes/EtOAc 1:0 – 100:1 - 50:1) to yield the title compound as a colorless oil (109 mg, 31%).  $^1\text{H}$  NMR (400 MHz,  $\text{CDCl}_3$ )  $\delta$  5.22 (hept,  $J = 1.4$  Hz, 1H), 2.67 (s, 2H), 1.73 (d,  $J = 1.4$  Hz, 3H), 1.68 (d,  $J = 1.5$  Hz, 3H), 1.23 (s, 6H), 0.23 (s, 9H).  $^{13}\text{C}$  NMR (101 MHz,  $\text{CDCl}_3$ )  $\delta$  187.3, 132.3, 132.1, 103.7, 97.2, 57.6, 35.6, 29.5, 28.2, 19.3, -0.6. IR (film)  $\tilde{\nu}$  2963, 2927, 1664, 1252, 1078  $\text{cm}^{-1}$ . HRMS (ESI<sup>+</sup>) for  $\text{C}_{14}\text{H}_{24}\text{OSi}$  [ $\text{M}+\text{Na}$ ]<sup>+</sup>: calcd 237.1669, found 237.1670.

**2,2,9-Trimethyldec-8-en-3-yn-5-one (35).** *n*-BuLi (1.6 M in hexanes, 1.23 mL, 2.03 mmol) was slowly added

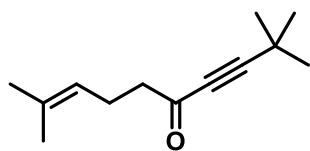

to a solution of 3,3-dimethyl-1-butyne (195 mg, 2.37 mmol) in THF (13.7 mL) at 0 °C. The mixture was stirred for 30 min at 0 °C before a solution of aldehyde **S15** (250 mg, 1.69 mmol) in THF (1 mL) was introduced. The mixture was stirred for 5 min before sat.  $\text{NH}_4\text{Cl}$  solution (4 mL) and EtOAc (20 mL) were

added. The layers were separated and the aqueous phase was extracted with EtOAc (2 x 30 mL). The combined organic layers were dried over  $\text{MgSO}_4$  and the solvent was removed under reduced pressure. The crude product was purified by flash chromatography (silica, hexanes/EtOAc 20:1) to yield the corresponding secondary alcohol (216 mg, 66%) which was immediately used in the next step.

$\text{NaHCO}_3$  (443 mg, 5.28 mmol) and Dess-Martin periodinane (671 mg, 1.58 mmol) were added to a solution this alcohol (205 mg, 1.06 mmol) in wet  $\text{CH}_2\text{Cl}_2$  (10.0 mL) at 0 °C. The mixture was stirred at room temperature for 30 min before aq. sat.  $\text{Na}_2\text{S}_2\text{O}_3$  (3 mL) and water (3 mL) were added. The layers were separated and the aqueous phase was extracted with methyl *tert*-butyl ether (2 x 25 mL). The combined organic layers were washed with brine and dried over  $\text{MgSO}_4$ . The solvent was evaporated and the residue was purified by flash chromatography (silica, hexanes/EtOAc 1:0 – 50:1) to give the title compound as a colorless oil (169 mg, 83%).  $^1\text{H}$  NMR (400 MHz,  $\text{CDCl}_3$ )  $\delta$  5.08 (tdq,  $J = 7.2, 2.9, 1.5$  Hz, 1H), 2.57 – 2.51 (m, 2H), 2.38 – 2.30 (m, 2H), 1.68 (q,  $J = 1.3$  Hz, 3H), 1.63 (s, 3H), 1.28 (s, 9H).  $^{13}\text{C}$  NMR (101 MHz,  $\text{CDCl}_3$ )  $\delta$  188.5, 133.2, 122.4, 101.8, 79.4, 45.9, 30.3, 27.9, 25.8, 23.1, 17.8. IR (film)  $\tilde{\nu}$  2971, 2929, 2205, 1673, 1266, 1124  $\text{cm}^{-1}$ . HRMS (CI<sup>+</sup>) for  $\text{C}_{13}\text{H}_{20}\text{O}$  [ $\text{M}+\text{H}$ ]<sup>+</sup>: calcd 193.1587, found 193.1588.

**3-Methylbut-2-en-1-yl 3-(trimethylsilyl)propiolate (37).** LiHMDS (1 M in THF, 12.9 mL, 12.9 mL) was added

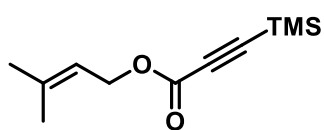

to a solution of alkyne **S16** (1.49 g, 10.8 mmol) in THF (100 mL) at -78 °C and the mixture was stirred for 30 min at that temperature before TMSCl (4.10 mL, 32.3 mmol) was added. The mixture was allowed to reach room temperature and stirring was continued for 30 min before sat.  $\text{NH}_4\text{Cl}$  solution



(20 mL) and EtOAc (50 mL) were introduced. The layers were separated and the aqueous phase was extracted with EtOAc (2 x 100 mL). The combined organic layers were washed with brine and dried over MgSO<sub>4</sub>. The solvent was evaporated and the residue purified by flash chromatography (silica, hexanes/EtOAc 20:1). The title compound was obtained as a colorless oil (2.02 g, 89%). <sup>1</sup>H NMR (400 MHz, CDCl<sub>3</sub>) δ 5.36 (tdq, *J* = 7.2, 2.9, 1.4 Hz, 1H), 4.66 (dt, *J* = 7.4, 0.8 Hz, 2H), 1.76 (m, 3H), 1.72 – 1.70 (m, 3H), 0.23 (s, 9H). <sup>13</sup>C NMR (101 MHz, CDCl<sub>3</sub>) δ 153.3, 140.6, 117.7, 94.8, 93.9, 62.9, 25.9, 18.2, -0.7. IR (film)  $\tilde{\nu}$  2965, 2176, 1708, 1213 cm<sup>-1</sup>. HRMS (ESI<sup>+</sup>) for C<sub>11</sub>H<sub>18</sub>O<sub>2</sub>Si [M+Na]<sup>+</sup>: calcd 233.0968, found 233.0969.

**(E)-1-Methoxy-1-(8-methylnon-6-en-1-yn-1-yl)cyclohexane (1c).** *n*-BuLi (1.6 M in hexanes, 1.08 mL,

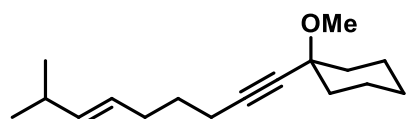

1.74 mmol) was slowly added to a solution of alkyne **S1** (200 mg, 1.45 mmol) in THF (5 mL) at 0 °C. The mixture was stirred for 30 min at 0 °C before a solution of alkyl bromide **S20** (332 mg, 1.74 mmol) in THF (3.3 mL) and DMPU (0.9 mL) was introduced. The mixture was

stirred at room temperature for 18 h before sat. NH<sub>4</sub>Cl solution (2 mL), *tert*-butyl methyl ether (10 mL) and water (2 mL) were added. The layers were separated, the aqueous phase was extracted with *tert*-butyl methyl ether (3 x 20 mL) and the combined organic layers were washed with brine and dried over MgSO<sub>4</sub>. The solvent was evaporated and the crude product purified by flash chromatography (silica, hexanes/EtOAc 1:0 – 80:1 – 40:1) to give the product as a colorless oil (216 mg, 60%). <sup>1</sup>H NMR (400 MHz, CDCl<sub>3</sub>) δ 5.41 (ddt, *J* = 15.3, 6.1, 1.0 Hz, 1H), 5.32 (dtd, *J* = 15.3, 6.4, 0.9 Hz, 1H), 3.35 (s, 3H), 2.23 (t, *J* = 7.1 Hz, 2H), 2.24 (m, 1H), 2.09 (m, 2H), 1.90 – 1.82 (m, 2H), 1.70 – 1.46 (m, 9H), 1.28 (m, 1H), 0.96 (d, *J* = 6.7 Hz, 6H). <sup>13</sup>C NMR (101 MHz, CDCl<sub>3</sub>) δ 138.8, 126.1, 86.4, 81.3, 74.2, 50.6, 37.2, 31.8, 31.2, 29.0, 25.7, 23.1, 22.8, 18.2. IR (film)  $\tilde{\nu}$  2932, 2858, 2822, 1448, 1093 cm<sup>-1</sup>. HRMS (ESI<sup>+</sup>) for C<sub>17</sub>H<sub>28</sub>O [M+Na]<sup>+</sup>: calcd: 271.2032, found: 271.2032.

**(Z)-8-(1-Methoxycyclohexyl)oct-2-en-7-yn-1-yl)trimethylsilane (1d)** (*E/Z* = 1:6). PhLi (1.8 M in dibutyl

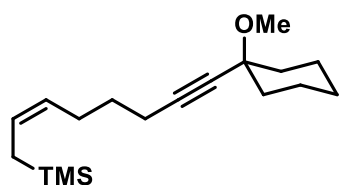

ether, 0.76 mL, 1.37 mmol) was slowly added to a solution of (2-trimethylsilylethyl)triphenylphosphonium iodide (671 mg, 1.37 mmol) in THF (5.8 mL) at room temperature. The resulting mixture was stirred for 1 h before aldehyde **S22** (150 mg, 0.72 mmol) in THF (1 mL) was introduced. Stirring was continued for 18 h at ambient temperature before sat. NH<sub>4</sub>Cl

solution (3 mL) and methyl *tert*-butyl ether (10 mL) were added. The layers were separated and the aqueous phase was extracted with methyl *tert*-butyl ether (2 x 20 mL). The combined organic layers were washed with brine and dried over MgSO<sub>4</sub>. The solvent was evaporated and the residue purified by flash chromatography (silica, hexanes/EtOAc 1:0 – 100:1 – 50:1) to obtain the title compound as a colorless oil (*dr* = 6:1, 158 mg, 75%). <sup>1</sup>H NMR (400 MHz, CDCl<sub>3</sub>) major: δ 5.48 – 5.36 (m, 1H), 5.29 – 5.18 (m, 1H), 3.35 (s, 3H), 2.25 (t, *J* = 7.0 Hz, 2H), 2.11 (qd, *J* = 7.3, 1.7 Hz, 2H), 1.90 – 1.80 (m, 2H), 1.69 – 1.45 (m, 11H), 1.33 – 1.23 (m, 1H), -0.00 (s, 9H). <sup>13</sup>C NMR (101 MHz, CDCl<sub>3</sub>) major: δ 126.6, 126.5, 86.5, 81.3, 74.2, 50.6, 37.2, 29.2, 26.3, 25.7, 23.1, 18.6, 18.5, -1.7. IR (film)  $\tilde{\nu}$  2933, 2857, 1447, 1247, 1093 cm<sup>-1</sup>. HRMS (CI) for C<sub>18</sub>H<sub>32</sub>O<sub>2</sub>Si [M+H]<sup>+</sup>: calcd 293.2295, found 293.2292.

**1-Methoxy-1-(7-methoxyhept-6-en-1-yn-1-yl)cyclohexane (1e).** PhLi (1.8 M in *n*-Bu<sub>2</sub>O, 0.41 mL,

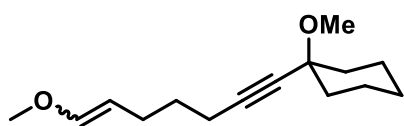

0.73 mmol) was slowly added to a solution of (methoxymethyl)triphenylphosphonium chloride (263 mg, 0.77 mmol) in Et<sub>2</sub>O (3.2 mL) at 0 °C. The mixture was stirred for 10 min at 0 °C before a solution of aldehyde **S22** (80 mg, 0.38 mmol) in Et<sub>2</sub>O

(1 mL) was introduced. The mixture was stirred at room temperature for 10 min before sat. NH<sub>4</sub>Cl solution (1 mL) and *tert*-butyl methyl ether (5 mL) were added. The layers were separated and the aqueous phase was extracted with *tert*-butyl methyl ether (3 x 20 mL). The combined organic layers were washed with brine and dried over MgSO<sub>4</sub>. The solvent was removed under reduced pressure and the residue was purified by flash chromatography (silica, hexanes/EtOAc 1:0 – 20:1) to give the title compound as a pale yellow oil (44 mg, 48%). <sup>1</sup>H NMR (400 MHz, CDCl<sub>3</sub>) δ (mixture of *E/Z* isomers: 54/46) 6.30 (dt, *J* = 12.7, 1.2 Hz, 0.54H), 5.90 (dt, *J* = 6.2, 1.4 Hz, 0.46H), 4.70 (dt, *J* = 12.6, 7.4 Hz, 0.54H), 4.33 (td, *J* = 7.4, 6.2 Hz, 0.46H), 3.57 (s, 1.08H), 3.51 (s, 1.62H), 3.35 (s, s, 3H), 2.24 (t, *J* = 7.1 Hz, 2H), 2.17 (qd, *J* = 7.4, 1.5 Hz, 0.92H), 2.05 (qd, *J* = 7.4, 1.2 Hz, 1.08H), 1.90 – 1.80 (m, 2H), 1.68 – 1.45 (m, 9H), 1.33 – 1.22 (m, 1H). <sup>13</sup>C NMR (101 MHz, CDCl<sub>3</sub>) δ 147.8, 146.8, 105.9, 102.0, 86.6, 86.2, 81.4, 81.2, 74.2, 74.2, 59.6, 56.1, 50.6, 37.2, 37.2, 30.0, 29.3, 26.9, 25.8, 25.7, 23.3, 23.1, 18.4, 18.0. IR (film)  $\tilde{\nu}$  2932, 2856, 1656, 1448, 1210, 1110, 1090 cm<sup>-1</sup>. HRMS (EI) for C<sub>15</sub>H<sub>24</sub>O<sub>2</sub> [M]<sup>+</sup>: calcd: 236.1771, found: 236.1773.

**1-(7,7-Difluorohept-6-en-1-yn-1-yl)-1-methoxycyclohexane (1f).** A solution of aldehyde **S22** (110 mg,

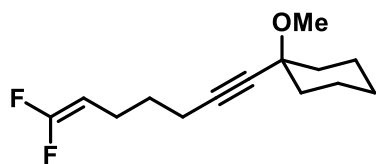

0.53 mmol) in DMF (2.3 mL) was added to solid PPh<sub>3</sub> (277 mg, 1.06 mmol) and sodium chlorodifluoroacetate (161 mg, 1.06 mmol). The mixture was stirred at 100 °C for 10 min before it was allowed to reach room temperature. Water (3 mL) and *tert*-butyl methyl ether (10 mL) were added and the layers were separated, the aqueous phase

was extracted with *tert*-butyl methyl ether (2 x 10 mL) and the combined organic layers were washed with brine (2 mL), H<sub>2</sub>O<sub>2</sub> solution (6% in water, 4 mL) and again brine. The organic layer was dried over MgSO<sub>4</sub> and the solvent was removed under reduced pressure. The crude product was purified by flash chromatography (silica, hexanes/EtOAc 1:0 – 50:1) to give the title compound as a colorless oil (62 mg, 48%). <sup>1</sup>H NMR (400 MHz, CDCl<sub>3</sub>) δ 4.14 (dtd, *J* = 25.3, 7.9, 2.5 Hz, 1H), 3.34 (s, 3H), 2.27 (t, *J* = 7.0 Hz, 2H), 2.11 (qt, *J* = 7.6, 1.8 Hz, 2H), 1.89 – 1.78 (m, 2H), 1.71 – 1.43 (m, 9H), 1.34 – 1.23 (m, 1H). <sup>13</sup>C NMR (101 MHz, CDCl<sub>3</sub>) δ 156.5 (dd, *J* = 287.5, 285.1 Hz), 85.3, 81.7, 77.3 (d, *J* = 21.6 Hz), 74.0, 50.4, 37.0, 28.6 (t, *J* = 2.5 Hz), 25.5, 22.9, 21.3 (d, *J* = 4.5 Hz), 19.0. <sup>19</sup>F NMR (282 MHz, CDCl<sub>3</sub>) δ -88.8 (d, *J* = 47.3 Hz), -91.3 (d, *J* = 47.4 Hz). IR (film)  $\tilde{\nu}$  2935, 2859, 1746, 1448, 1229, 1092 cm<sup>-1</sup>. HRMS (EI) for C<sub>14</sub>H<sub>20</sub>F<sub>2</sub>O [M-H]<sup>+</sup>: calcd: 241.1398, found: 241.1398.

**1-(7-Chlorohept-6-en-1-yn-1-yl)-1-methoxycyclohexane (1g).** *n*-BuLi (1.6 M in hexanes, 1.08 mL,

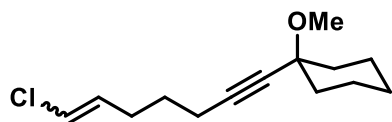

1.73 mmol) was slowly added to a solution of (chloromethyl)triphenylphosphonium chloride (666 mg, 1.92 mmol) in THF (9.3 mL) at 0 °C. The mixture was stirred for 30 min at room temperature before a solution of aldehyde **S22** (200 mg, 0.96 mmol) in

THF (1 mL) was introduced. The mixture was stirred at room temperature for 1 h before sat. NH<sub>4</sub>Cl solution (1 mL) and *tert*-butyl methyl ether (10 mL) were added. The layers were separated and the aqueous phase

was extracted with *tert*-butyl methyl ether (3 x 30 mL). The combined organic layers were washed with brine and dried over MgSO<sub>4</sub>. The solvent was removed under reduced pressure and the residue was purified by flash chromatography (silica, hexanes/EtOAc 1:0 – 40:1) to give the title compound as a pale colorless oil (183 mg, 79%, *E/Z* = 1 : 0.66). <sup>1</sup>H NMR (400 MHz, CDCl<sub>3</sub>) δ 6.05 (dt, *J* = 7.1, 1.5 Hz, 0.66H), 5.98 (dt, *J* = 13.3, 1.1 Hz, 1H), 5.89 (dt, *J* = 13.2, 7.1 Hz, 1H), 5.77 (q, *J* = 7.2 Hz, 0.66H), 3.35 (s, 2H), 3.34 (s, 3H), 2.36 (qd, *J* = 7.4, 1.5 Hz, 1.5H), 2.27 (dt, *J* = 8.0, 7.0 Hz, 4H), 2.19 (qd, *J* = 7.4, 1.1 Hz, 2.5H), 1.85 (m, 4H), 1.71 – 1.43 (m, 18H), 1.35 – 1.17 (m, 2H). <sup>13</sup>C NMR (101 MHz, CDCl<sub>3</sub>) δ 133.0, 130.9, 118.9, 117.7, 85.8, 85.5, 82.0, 81.8, 74.2, 74.2, 50.6, 50.6, 37.2, 37.2, 30.0, 28.1, 27.8, 26.4, 25.7, 25.7, 23.1, 18.5, 18.1. IR (film)  $\tilde{\nu}$  2933, 2857, 1630, 1447, 1090 cm<sup>-1</sup>. HRMS (CI<sup>+</sup>) for C<sub>14</sub>H<sub>21</sub>ClO [M+H]<sup>+</sup>: calcd 241.1353, found 241.1351.

**Ethyl (*E*)-8-(1-methoxycyclohexyl)-2-methyloct-2-en-7-ynoate (**1h**).** In a two-neck round-bottom flask

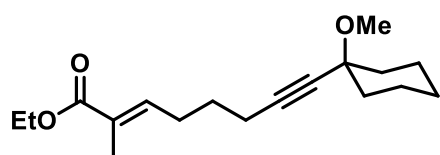

equipped with a reflux condenser was added (1-ethoxycarbonylethylidene)-triphenylphosphorane (502 mg, 1.39 mmol) to a solution of aldehyde **S22** (170 mg, 0.82 mmol) in THF (4.6 mL) at room temperature. The resulting mixture was

stirred for 3 h at 60 °C. Sat. NH<sub>4</sub>Cl solution (1 ml) and EtOAc (5 mL) were added and the layers separated. The aqueous phase was extracted with EtOAc (2 x 20 mL) and the combined organic layers were washed with brine and dried over MgSO<sub>4</sub>. The solvent was evaporated and the residue purified by flash chromatography (silica, hexanes/EtOAc 40:1 – 20:1) to yield the title compound as a colorless oil (156 mg, 65%, *E/Z* = 20:1). Diethyl 2,3-dimethylfumarate impurities were removed by bulb-to-bulb distillation (70 – 90 °C, 1 x 10<sup>-2</sup> mbar). <sup>1</sup>H NMR (400 MHz, CDCl<sub>3</sub>) δ 6.74 (tq, *J* = 7.5, 1.5 Hz, 1H), 4.19 (q, *J* = 7.1 Hz, 2H), 3.34 (s, 3H), 2.35 – 2.24 (m, 4H), 1.91 – 1.79 (m, 5H), 1.72 – 1.43 (m, 9H), 1.29 (t, *J* = 7.1 Hz, 3H), 1.25 (m, 1H). <sup>13</sup>C NMR (101 MHz, CDCl<sub>3</sub>) δ 168.3, 141.1, 128.8, 85.6, 81.9, 74.2, 60.6, 50.6, 37.1, 28.0, 27.8, 25.7, 23.1, 18.5, 14.5, 12.5. IR (film)  $\tilde{\nu}$  2933, 2858, 1709, 1447, 1255, 1081 cm<sup>-1</sup>. HRMS (ESI<sup>+</sup>) for C<sub>18</sub>H<sub>28</sub>O<sub>3</sub> [M+Na]<sup>+</sup>: calcd 315.1931, found 315.1931.

**Ethyl (*E*)-8-(1-methoxycyclohexyl)oct-2-en-7-ynoate (**1i**).** (Carbethoxymethylene)triphenylphosphorane

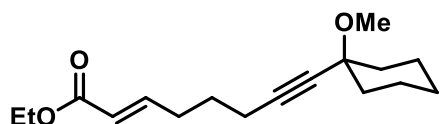

(376 mg, 1.08 mmol) was added to a solution of aldehyde **S22** (150 mg, 0.72 mmol) in CHCl<sub>3</sub> (4.0 mL) at room temperature and the resulting mixture was stirred for 18 h. Sat. NH<sub>4</sub>Cl solution (1 mL) and EtOAc (4 mL) were added and the layers were

separated. The aqueous phase was extracted with EtOAc (2 x 10 mL) and the combined organic layers were washed with brine and dried over MgSO<sub>4</sub>. The solvent was evaporated and the residue purified by flash chromatography (silica, hexanes/EtOAc 20:1 – 15:1 – 10:1) to yield the title compound as a colorless oil (144 mg, 72%). <sup>1</sup>H NMR (400 MHz, CDCl<sub>3</sub>) δ 6.95 (dt, *J* = 15.7, 7.0 Hz, 1H), 5.84 (dt, *J* = 15.7, 1.6 Hz, 1H), 4.18 (q, *J* = 7.1 Hz, 2H), 3.34 (s, 3H), 2.33 (qd, *J* = 7.2, 1.7 Hz, 2H), 2.28 (t, *J* = 6.9 Hz, 2H), 1.89 – 1.78 (m, 2H), 1.73 – 1.43 (m, 10H), 1.28 (t, *J* = 7.1 Hz, 3H). <sup>13</sup>C NMR (101 MHz, CDCl<sub>3</sub>) δ 166.7, 148.2, 122.1, 85.4, 82.1, 74.1, 60.4, 50.6, 37.1, 31.3, 27.4, 25.7, 23.1, 18.3, 14.4. IR (film)  $\tilde{\nu}$  2933, 2857, 1719, 1655, 1446, 1091 cm<sup>-1</sup>. HRMS (CI) for C<sub>17</sub>H<sub>26</sub>O<sub>3</sub> [M]<sup>+</sup>: calcd 278.1876, found 278.1876.

**Methyl (Z)-8-(1-methoxycyclohexyl)oct-2-en-7-ynoate (1j).**

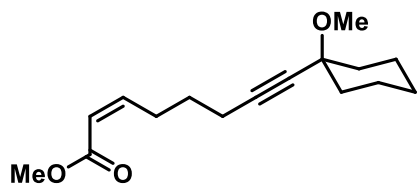

18-Crown-6 (545 mg, 2.06 mmol) was added to a solution of KHMDS (239 mg, 1.20 mmol) in THF (4.2 mL) at room temperature. The solution was cooled to  $-78\text{ }^{\circ}\text{C}$  before bis(2,2,2-trifluoroethyl) (methoxycarbonylmethyl)phosphonate (0.25 mL, 1.20 mmol) was added dropwise and stirring was continued for 20 min at that temperature. A solution of aldehyde **S22** (179 mg,

0.86 mmol) in THF (1 mL) was slowly introduced and the mixture stirred for 3 h at  $-78\text{ }^{\circ}\text{C}$  before sat.  $\text{NH}_4\text{Cl}$  solution and EtOAc (3 mL) were added. The layers were separated and the aqueous phase extracted with EtOAc (2 x 20 mL). The combined organic layers were washed with brine and dried over  $\text{MgSO}_4$ . The solvent was evaporated and the residue purified by flash chromatography (silica, hexanes/EtOAc 20:1 – 15:1 – 10:1) to yield the title compound as a colorless oil (129 mg, 57%).  $^1\text{H}$  NMR (400 MHz,  $\text{CDCl}_3$ )  $\delta$  6.24 (dt,  $J = 11.5, 7.5$  Hz, 1H), 5.80 (dt,  $J = 11.5, 1.7$  Hz, 1H), 3.70 (s, 3H), 3.34 (s, 3H), 2.76 (qd,  $J = 7.5, 1.7$  Hz, 2H), 2.29 (t,  $J = 7.2$  Hz, 2H), 1.89 – 1.79 (m, 2H), 1.73 – 1.58 (m, 4H), 1.51 (h,  $J = 9.7$  Hz, 5H), 1.32 – 1.22 (m, 1H).  $^{13}\text{C}$  NMR (101 MHz,  $\text{CDCl}_3$ )  $\delta$  166.8, 149.6, 120.1, 85.8, 81.7, 74.1, 51.2, 50.6, 37.1, 28.5, 28.4, 25.7, 23.0, 18.6. IR (film)  $\tilde{\nu}$  2933, 2857, 1722, 1646, 1438, 1176  $\text{cm}^{-1}$ . HRMS (ESI $^+$ ) for  $\text{C}_{16}\text{H}_{24}\text{O}_3$   $[\text{M}+\text{Na}]^+$ : calcd 287.1618, found 287.1622.

**(E)-8-(1-Methoxycyclohexyl)oct-2-en-7-ynal (1k).**

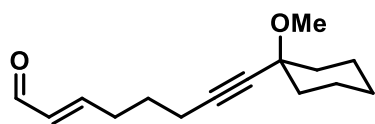

(Formylmethylene)triphenylphosphorane (315 mg, 1.04 mmol) was added to a solution of aldehyde **S22** (180 mg, 0.86 mmol) in  $\text{CH}_2\text{Cl}_2$  (4.4 mL) at room temperature and the resulting mixture was stirred for 4 d. Sat.  $\text{NH}_4\text{Cl}$  solution (1 mL) and EtOAc (5 mL) were added and the layers separated. The aqueous phase was extracted

with EtOAc (2 x 15 mL) and the combined organic layers washed with brine and dried over  $\text{MgSO}_4$ . The solvent was evaporated and the residue purified by flash chromatography (silica, hexanes/EtOAc 20:1–10:1) to yield the title compound as a colorless oil (28 mg, 14%).  $^1\text{H}$  NMR (400 MHz,  $\text{CDCl}_3$ )  $\delta$  9.52 (d,  $J = 7.9$  Hz, 1H), 6.85 (dt,  $J = 15.6, 6.8$  Hz, 1H), 6.15 (ddt,  $J = 15.6, 7.8, 1.5$  Hz, 1H), 3.34 (s, 3H), 2.48 (dtd,  $J = 8.2, 6.9, 1.5$  Hz, 2H), 2.32 (t,  $J = 6.9$  Hz, 2H), 1.85 (m, 2H), 1.75 (dq,  $J = 8.0, 6.9$  Hz, 2H), 1.69 – 1.42 (m, 7H), 1.33 – 1.23 (m, 1H).  $^{13}\text{C}$  NMR (101 MHz,  $\text{CDCl}_3$ )  $\delta$  194.0, 157.6, 133.6, 85.0, 82.4, 74.1, 50.6, 37.1, 37.1, 31.8, 27.2, 25.6, 23.0, 23.0, 18.4. IR (film)  $\tilde{\nu}$  2933, 2856, 2235, 1688, 1447, 1088  $\text{cm}^{-1}$ . HRMS (ESI $^+$ ) for  $\text{C}_{15}\text{H}_{22}\text{O}_2$   $[\text{M}+\text{Na}]^+$ : calcd 257.1512, found 257.1513.

**(E)-9-(1-Methoxycyclohexyl)non-3-en-8-yn-2-one (1l).**

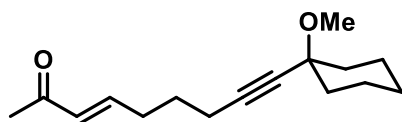

a reflux condenser was added (acetylmethylene)-triphenylphosphorane (344 mg, 1.08 mmol) to a solution of aldehyde **S22** (150 mg, 0.72 mmol) in THF (4.0 mL) at room temperature and the resulting mixture was stirred for 18 h at  $60\text{ }^{\circ}\text{C}$ . Sat.  $\text{NH}_4\text{Cl}$  solution

(1 mL) and EtOAc (4 mL) were added and the layers separated. The aqueous phase was extracted with EtOAc (2 x 20 mL) and the combined organic layers washed with brine and dried over  $\text{MgSO}_4$ . The solvent was evaporated and the residue purified by flash chromatography (silica, hexanes/EtOAc 10:1 – 4:1) to yield the title compound as a colorless oil (133 mg, 74%).  $^1\text{H}$  NMR (400 MHz,  $\text{CDCl}_3$ )  $\delta$  6.79 (dt,  $J = 16.0, 6.9$  Hz, 1H), 6.10 (dt,  $J = 16.0, 1.5$  Hz, 1H), 3.34 (s, 3H), 2.36 (qd,  $J = 7.0, 1.6$  Hz, 2H), 2.29 (t,  $J = 7.0$  Hz, 2H), 2.24 (s, 3H), 1.89 – 1.77 (m, 2H), 1.75 – 1.42 (m, 9H), 1.28 (td,  $J = 10.4, 6.2$  Hz, 1H).  $^{13}\text{C}$  NMR (101 MHz,

CDCl<sub>3</sub>)  $\delta$  198.6, 147.2, 131.9, 85.2, 82.2, 74.1, 50.6, 37.1, 31.5, 27.4, 27.1, 25.7, 23.0, 18.4. IR (film)  $\tilde{\nu}$  2933, 2857, 2233, 1675, 1628, 1360, 1252, 1089 cm<sup>-1</sup>. HRMS (ESI<sup>+</sup>) for C<sub>16</sub>H<sub>24</sub>O<sub>2</sub> [M+Na]<sup>+</sup>: calcd 271.1668, found 271.1667.

**8-(1-Methoxycyclohexyl)-2-methyloct-2-en-7-yn-4-one (1m).** NaHCO<sub>3</sub> (109 mg, 1.3 mmol) and Dess-

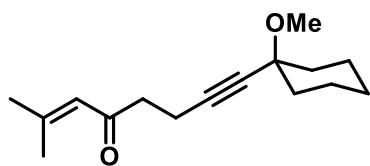

Martin periodinane (165 mg, 0.39 mmol) were added to a solution of alcohol **S26** (65 mg, 0.26 mmol) in wet CH<sub>2</sub>Cl<sub>2</sub> (2.4 mL) at 0 °C. The mixture was stirred at room temperature for 30 min before aq. sat. Na<sub>2</sub>S<sub>2</sub>O<sub>3</sub> (1 mL) and water (1 mL) were added. The layers were separated and the aqueous phase was extracted with CH<sub>2</sub>Cl<sub>2</sub> (2 x 10 mL). The

combined organic layers were washed with brine and dried over MgSO<sub>4</sub>. The solvent was evaporated and the residue was purified by flash chromatography (silica, hexanes/EtOAc 1:0 – 40:1 – 20:1) to give the product as a colorless oil (44 mg, 68%, accompanied by small amounts (12 mol%) of an impurity). <sup>1</sup>H NMR (400 MHz, CDCl<sub>3</sub>)  $\delta$  6.08 (hept, *J* = 1.3 Hz, 1H), 3.32 (s, 3H), 2.68 – 2.61 (m, 2H), 2.54 – 2.48 (m, 2H), 2.14 (d, *J* = 1.2 Hz, 3H), 1.89 (d, *J* = 1.3 Hz, 3H), 1.86 – 1.80 (m, 2H), 1.65 – 1.57 (m, 2H), 1.55 – 1.43 (m, 5H), 1.23 (m, 1H). <sup>13</sup>C NMR (101 MHz, CDCl<sub>3</sub>)  $\delta$  198.7, 156.0, 123.5, 85.4, 81.5, 74.1, 50.6, 43.4, 37.1, 27.8, 25.7, 23.0, 21.0, 13.8. IR (neat)  $\tilde{\nu}$  2933, 2856, 2237, 1689, 1620, 1446, 1091 cm<sup>-1</sup>. HRMS (ESI<sup>+</sup>) for C<sub>16</sub>H<sub>24</sub>O<sub>2</sub> [M+Na]<sup>+</sup>: calcd 271.1688, found 271.1688.

**1-(Methoxymethoxy)-1-(7-methyloct-6-en-1-yn-1-yl)cyclohexane (S52).** *n*-BuLi (1.6 M in hexanes,

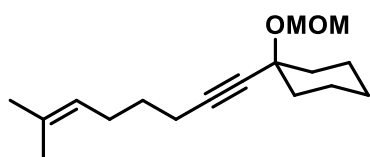

12.2 mL, 19.5 mmol) was slowly added to a solution of alkyne **S27** (2.73 g, 16.2 mmol) in THF (57 mL) at 0 °C. The mixture was stirred for 30 min at 0 °C before a solution of alkyl bromide **S13** (3.73 g, 21.1 mmol) in THF (37 mL) and DMPU (9.8 mL) was added. The resulting

mixture was stirred at room temperature for 18 h. sat. NH<sub>4</sub>Cl solution (10 mL), *tert*-butyl methyl ether (50 mL) and water (10 mL) were added, the aqueous phase was extracted with *tert*-butyl methyl ether (3 x 100 mL) and the combined organic layers were washed with brine and dried over MgSO<sub>4</sub>. The solvent was evaporated and the residue purified by flash chromatography (silica, hexanes/EtOAc 1:0 – 20:1) to give the title compound as a colorless oil (4.12 g, 96%). <sup>1</sup>H NMR (400 MHz, CDCl<sub>3</sub>)  $\delta$  5.10 (tdq, *J* = 7.2, 2.9, 1.4 Hz, 1H), 4.94 (s, 2H), 3.39 (s, 3H), 2.23 (t, *J* = 7.1 Hz, 2H), 2.08 (q, *J* = 7.4 Hz, 2H), 1.96 – 1.86 (m, 2H), 1.69 (q, *J* = 1.3 Hz, 3H), 1.68 – 1.62 (m, 3H), 1.61 (s, 3H), 1.59 – 1.48 (m, 6H), 1.30 – 1.19 (m, 1H). <sup>13</sup>C NMR (101 MHz, CDCl<sub>3</sub>)  $\delta$  132.5, 123.8, 92.9, 87.5, 80.9, 75.5, 55.8, 39.1, 29.2, 27.3, 25.9, 25.6, 23.4, 18.4, 17.8. IR (film)  $\tilde{\nu}$  2931, 2857, 1447, 1149, 1026 cm<sup>-1</sup>. HRMS (ESI<sup>+</sup>) for C<sub>17</sub>H<sub>28</sub>O<sub>2</sub> [M+Na]<sup>+</sup>: calcd: 287.1981, found: 287.1980.

***tert*-Butyldimethyl((1-(7-methyloct-6-en-1-yn-1-yl)cyclohexyl)oxy)silane (S53).** *n*-BuLi (1.6 M in hexanes,

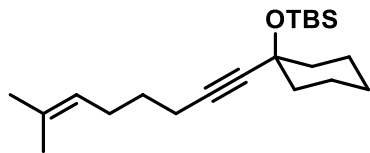

1.3 mL, 2.1 mmol) was slowly added to a solution of alkyne **S28** (412 mg, 1.7 mmol) in THF (6.0 mL) at 0 °C. The mixture was stirred for 30 min at 0 °C before a solution of alkyl bromide **S13** (398 mg, 2.2 mmol) in THF (3.9 mL) and DMPU (1.0 mL) was added. The mixture was stirred at room

temperature for 18 h. sat. NH<sub>4</sub>Cl solution (3 mL), *tert*-butyl methyl ether (20 mL) and water (2 mL) were introduced, the aqueous phase was extracted with *tert*-butyl methyl ether (2 x 30 mL) and the combined

organic layers were washed with brine and dried over MgSO<sub>4</sub>. The solvent was evaporated and the residue was purified by flash chromatography (silica, hexanes) to give the title compound as a colorless oil (523 mg, 90%). <sup>1</sup>H NMR (400 MHz, CDCl<sub>3</sub>) δ 5.10 (m, 1H), 2.20 (t, *J* = 7.1 Hz, 2H), 2.08 (q, *J* = 7.4 Hz, 2H), 1.77 – 1.69 (m, 2H), 1.70 (q, *J* = 1.3 Hz, 3H), 1.67 – 1.59 (m, 2H), 1.62 (s, 3H), 1.59 – 1.45 (m, 6H), 1.46 – 1.34 (m, 1H), 1.35 – 1.24 (m, 1H), 0.88 (s, 9H), 0.15 (s, 6H). <sup>13</sup>C NMR (101 MHz, CDCl<sub>3</sub>) δ 132.4, 123.9, 85.0, 84.9, 69.4, 41.6, 29.1, 27.4, 26.1, 25.9, 25.6, 23.0, 18.5, 18.3, 17.9, -2.7. IR (film)  $\tilde{\nu}$  2930, 2855, 1446, 1250, 1095, 1052 cm<sup>-1</sup>. HRMS (ESI<sup>+</sup>) for C<sub>21</sub>H<sub>38</sub>OSi [M+Na]<sup>+</sup>: calcd: 357.2584, found: 257.2585.

**N-(4-((*tert*-butyldimethylsilyl)oxy)-4-methylpent-2-yn-1-yl)-4-methyl-N-(3-methylbut-2-en-1-yl)benzenesulfonamide (S54).**

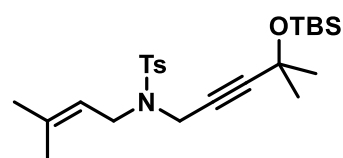

TBSOTf (82  $\mu$ L, 0.36 mmol) was added to a solution of alcohol **S29** (100 mg, 0.30 mmol) and 2,6-lutidine (69  $\mu$ L, 0.60 mmol) in CH<sub>2</sub>Cl<sub>2</sub> (0.8 mL) at -15 °C (ice/acetone bath). Stirring was continued for 2 h before water (0.5 mL) was added. After reaching room temperature, the layers were separated and the aqueous phase was extracted with CH<sub>2</sub>Cl<sub>2</sub> (3 x 5 mL). The combined organic layers were washed with brine and dried over MgSO<sub>4</sub>. The solvent

was removed under reduced pressure and the crude product was purified by flash chromatography (silica, hexanes/EtOAc 20:1 – 10:1) to yield the title compound as a colorless amorphous solid (126 mg, quant.). <sup>1</sup>H NMR (400 MHz, CDCl<sub>3</sub>) δ 7.75 – 7.71 (m, 2H), 7.30 – 7.27 (m, 2H), 5.12 (dddd, *J* = 8.6, 5.7, 2.8, 1.4 Hz, 1H), 4.09 (s, 2H), 3.81 (d, *J* = 7.2 Hz, 2H), 2.41 (s, 3H), 1.72 (s, 3H), 1.67 (s, 3H), 1.21 (s, 6H), 0.82 (s, 9H), 0.05 (s, 6H). <sup>13</sup>C NMR (101 MHz, CDCl<sub>3</sub>) δ 143.1, 138.6, 136.6, 130.0, 127.7, 118.2, 90.5, 75.4, 66.1, 44.0, 35.7, 32.6, 25.8, 25.6, 21.5, 17.9, 17.9, -3.0. IR (film)  $\tilde{\nu}$  2929, 2855, 1451, 1343, 1160 cm<sup>-1</sup>. HRMS (ESI<sup>+</sup>) for C<sub>24</sub>H<sub>39</sub>NO<sub>3</sub>SSi [M+Na]<sup>+</sup>: calcd: 472.2312, found: 472.2313.

**N-(4-Methoxy-4-methylpent-2-yn-1-yl)-4-methyl-N-(3-methylbut-2-en-1-yl)benzenesulfonamide (S55).**

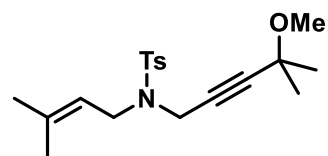

NaH (38 mg, 1.58 mmol) was added to a solution of alcohol **S29** (106 mg, 0.32 mmol) in THF (1.4 mL) at room temperature. The suspension was stirred for 10 min before MeI (0.2 mL, 3.16 mmol) was slowly added. After stirring for another 1 h at room temperature, water (1 mL) and *tert*-butyl methyl ether (5 mL) were introduced, the layers were separated, the aqueous phase was extracted with *tert*-butyl methyl ether (2 x 10 mL) and the combined organic layers were washed with brine and dried over MgSO<sub>4</sub>.

The solvent was removed under reduced pressure and the crude product was purified by flash chromatography (silica, hexanes/EtOAc 20:1 – 10:1 – 5:1) to yield the title compound as a colorless oil (106 mg, 96%). <sup>1</sup>H NMR (400 MHz, CDCl<sub>3</sub>) δ 7.76 – 7.70 (m, 2H), 7.32 – 7.27 (m, 2H), 5.13 (tdq, *J* = 7.3, 2.9, 1.3 Hz, 1H), 4.12 (s, 2H), 3.82 (d, *J* = 7.3 Hz, 2H), 3.11 (s, 3H), 2.41 (s, 3H), 1.73 (d, *J* = 1.3 Hz, 3H), 1.68 (d, *J* = 1.3 Hz, 3H), 1.20 (s, 6H). <sup>13</sup>C NMR (101 MHz, CDCl<sub>3</sub>) δ 143.2, 138.8, 136.5, 129.5, 127.7, 118.1, 87.0, 77.2, 70.2, 51.5, 43.9, 35.6, 28.0, 25.9, 21.5, 17.9. IR (film)  $\tilde{\nu}$  2982, 2932, 1738, 1346, 1159 cm<sup>-1</sup>. HRMS (ESI<sup>+</sup>) for C<sub>19</sub>H<sub>27</sub>NO<sub>3</sub>S [M+Na]<sup>+</sup>: calcd: 372.1604, found: 372.1603.

**N-Allyl-N-(4-((*tert*-butyldimethylsilyl)oxy)-4-methylpent-2-yn-1-yl)-4-methylbenzenesulfonamide (S56).**

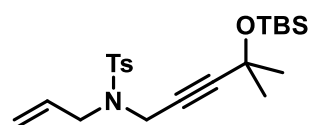

TBSOTf (54  $\mu$ L, 0.23 mmol) was added to a solution of alcohol **S30** (60 mg, 0.20 mmol) and 2,6-lutidine (46  $\mu$ L, 0.39 mmol) in CH<sub>2</sub>Cl<sub>2</sub> (0.6 mL) at -15 °C (ice/acetone bath). The mixture was stirred for 2 h before water (0.5 mL) was

added. After reaching room temperature the layers were separated and the aqueous phase was extracted with  $\text{CH}_2\text{Cl}_2$  (3 x 5 mL). The combined organic layers were washed with brine and dried over  $\text{MgSO}_4$ . The solvent was removed under reduced pressure and the crude product was purified by flash chromatography (silica, hexanes/EtOAc 20:1 – 10:1) to yield the title compound as a colorless amorphous solid (67 mg, 81%).  $^1\text{H}$  NMR (400 MHz,  $\text{CDCl}_3$ )  $\delta$  7.73 (d,  $J$  = 8.3 Hz, 2H), 7.29 (d,  $J$  = 7.9 Hz, 1H), 5.74 (ddt,  $J$  = 17.1, 10.0, 6.4 Hz, 1H), 5.28 (dq,  $J$  = 17.2, 1.4 Hz, 1H), 5.23 (dq,  $J$  = 10.1, 1.2 Hz, 1H), 4.12 (s, 2H), 3.83 (d,  $J$  = 6.4 Hz, 2H), 2.41 (s, 3H), 1.21 (s, 6H), 0.82 (s, 9H), 0.05 (s, 6H).  $^{13}\text{C}$  NMR (101 MHz,  $\text{CDCl}_3$ )  $\delta$  143.5, 136.6, 132.2, 129.7, 127.8, 119.9, 91.1, 75.1, 66.2, 49.1, 36.1, 32.8, 25.8, 21.6, 18.0, -2.8. IR (film)  $\tilde{\nu}$  2929, 2856, 1352, 1162, 1042  $\text{cm}^{-1}$ . HRMS (ESI<sup>+</sup>) for  $\text{C}_{22}\text{H}_{35}\text{NO}_3\text{Si}$  [ $\text{M}+\text{Na}$ ]<sup>+</sup>: calcd: 444.1999, found: 444.2001.

**Triethyl((2-methyl-5-((3-methylbut-2-en-1-yl)oxy)pent-3-yn-2-yl)oxy)silane (S57).** Alcohol **S31** (150 mg,

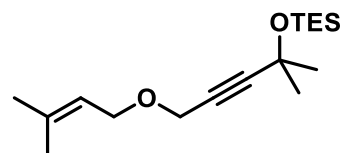

0.66 mmol) was added at 0 °C to a suspension of NaH (15.7 mg, 0.66 mmol) in THF (5 mL). The mixture was stirred for 1 h at 0 °C before 1-bromo-3-methyl-2-butene (0.15 mL, 1.3 mmol) was slowly introduced. The mixture was allowed to reach ambient temperature overnight. The reaction was

quenched with sat.  $\text{NH}_4\text{Cl}$  solution (5 mL), the aqueous phase was extracted with  $\text{CH}_2\text{Cl}_2$  (3 x 3 mL) and the combined organic layers were washed with sat. aq. NaCl solution, dried over  $\text{Na}_2\text{SO}_4$  and concentrated under reduced pressure. The crude product was purified by flash chromatography (silica, hexanes/EtOAc 50:1) to give the title compound as a colorless oil (126 mg, 65%).  $^1\text{H}$  NMR (400 MHz,  $\text{CDCl}_3$ )  $\delta$  5.40 – 5.26 (m, 1H), 4.14 (s, 2H), 4.03 (d,  $J$  = 6.7 Hz, 2H), 1.81 – 1.67 (m, 6H), 1.48 (s, 6H), 0.96 (t,  $J$  = 7.9 Hz, 9H), 0.66 (q,  $J$  = 7.8 Hz, 6H).  $^{13}\text{C}$  NMR (101 MHz,  $\text{CDCl}_3$ )  $\delta$  138.2, 120.6, 91.6, 78.7, 66.3, 66.0, 57.4, 33.2, 26.0, 18.1, 7.1, 6.2. IR (film)  $\tilde{\nu}$  2956, 1716, 1362, 1237, 1163, 1037, 1004, 726  $\text{cm}^{-1}$ . HRMS (ESI<sup>+</sup>) for  $\text{C}_{17}\text{H}_{32}\text{O}_2\text{Si}$  [ $\text{M}+\text{Na}$ ]<sup>+</sup>: calcd: 319.2064, found: 319.2063.

**((5-(Allyloxy)-2-methylpent-3-yn-2-yl)oxy)(tert-butyl)dimethylsilane (S58).** To a solution of allyl

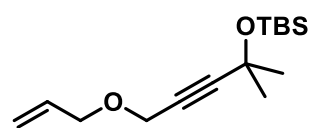

propargyl ether **S8** (150 mg, 1.5 mmol) in THF (6 mL) was added *n*-BuLi (1.6 M in hexanes, 0.97 mL, 1.56 mmol) at -78 °C. The mixture was stirred for 1 h at this temperature before acetone (0.17 mL, 2.3 mmol) was slowly introduced.

The mixture was allowed to reach ambient temperature overnight. The reaction was quenched with sat.  $\text{NH}_4\text{Cl}$  solution (10 mL). The aqueous phase was extracted with  $\text{Et}_2\text{O}$  (3 x 10 mL) and the combined organic layers were washed with sat. NaCl solution, dried over  $\text{Na}_2\text{SO}_4$  and concentrated under reduced pressure. The crude product was used directly in the next step.

2,6-Lutidine (0.2 mL, 1.74 mmol) and TBSOTf (0.24 mL, 1 mmol) were added at -15 °C to a solution of the crude alcohol (134 mg, 0.89 mmol) in  $\text{CH}_2\text{Cl}_2$  (2.5 mL). The mixture was warmed to ambient temperature over 2 h and stirring was continued for another 14 h. The reaction was quenched with sat. aq.  $\text{NH}_4\text{Cl}$  solution (5 mL), the aqueous phase was extracted with  $\text{CH}_2\text{Cl}_2$  (3 x 3 mL) and the combined organic layers were washed with brine, dried over  $\text{Na}_2\text{SO}_4$  and concentrated under reduced pressure. The residue was purified by flash chromatography (silica, hexanes/EtOAc 99:1) to give the title compound as a colorless oil (220 mg, 94%).  $^1\text{H}$  NMR (400 MHz,  $\text{CDCl}_3$ )  $\delta$  5.91 (ddt,  $J$  = 17.2, 10.4, 5.8 Hz, 1H), 5.31 (ddd,  $J$  = 17.2, 1.6, 1.6 Hz, 1H), 5.22 (ddd,  $J$  = 10.4, 1.4, 1.3 Hz, 1H), 4.17 (s, 2H), 4.05 (dt,  $J$  = 5.8, 1.4 Hz, 2H), 1.46 (s, 6H), 0.86 (s, 9H), 0.16 (s, 6H).  $^{13}\text{C}$  NMR (101 MHz,  $\text{CDCl}_3$ )  $\delta$  134.2, 117.9, 91.9, 78.4, 70.6, 66.4, 57.6, 33.0, 25.8, 18.1,

-2.8. IR (film)  $\tilde{\nu}$  2930, 1721, 1360, 1248, 1162, 1035, 828, 775, 678  $\text{cm}^{-1}$ . HRMS (ESI<sup>+</sup>) for C<sub>15</sub>H<sub>28</sub>O<sub>2</sub>Si [M+H]<sup>+</sup>: calcd: 269.1931, found: 269.1933.

**2-((2,9-Dimethyldec-8-en-3-yn-2-yl)oxy)tetrahydro-2H-pyran (S59).** *n*-BuLi (1.6 M in hexanes, 0.54 mL, 0.86 mmol) was slowly added to a solution of alkyne **S6** (120 mg, 0.71 mmol) in THF (2.5 mL) at 0 °C. The mixture was stirred for 30 min at 0 °C before alkyl bromide **S13** (164 mg, 0.93 mmol) dissolved in THF (1.6 mL) and DMPU (0.43 mL) was added. The mixture was allowed to warm to room temperature and stirring was continued for 22 h. Sat. NH<sub>4</sub>Cl solution (2 mL), methyl *tert*-butyl ether (20 mL) and water (1 mL) were added and the layers were separated. The aqueous layer was extracted with methyl *tert*-butyl ether (2 x 30 mL) and the combined organic layers were washed with sat. NaCl solution and dried over MgSO<sub>4</sub>. The solvent was removed under reduced pressure and the crude product was purified by column chromatography (silica, hexanes/EtOAc 1:0 – 20:1). The product was obtained as a colorless oil (147 mg, 78%). <sup>1</sup>H NMR (400 MHz, CDCl<sub>3</sub>)  $\delta$  5.10 (m, 1H), 5.07 – 5.03 (m, 1H), 3.98 – 3.90 (m, 1H), 3.53 – 3.45 (m, 1H), 2.19 (t, *J* = 7.1 Hz, 2H), 2.07 (q, *J* = 7.1 Hz, 2H), 1.90 – 1.78 (m, 1H), 1.73 – 1.66 (m, 1H), 1.69 (q, *J* = 1.3 Hz, 3H), 1.62 (s, 3H), 1.59 – 1.51 (m, 6H), 1.50 (s, 3H), 1.46 (s, 3H). <sup>13</sup>C NMR (101 MHz, CDCl<sub>3</sub>)  $\delta$  132.5, 123.8, 96.3, 84.6, 82.8, 71.5, 63.6, 32.2, 31.3, 30.3, 29.1, 27.2, 25.9, 25.6, 20.9, 18.3, 17.9. IR (film)  $\tilde{\nu}$  2937, 2860, 1440, 1378, 1022, 987  $\text{cm}^{-1}$ . HRMS (ESI<sup>+</sup>) for C<sub>17</sub>H<sub>28</sub>O<sub>2</sub> [M+Na]<sup>+</sup>: calcd: 287.1981, found: 287.1983.

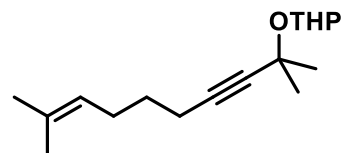

***tert*-Butyldimethyl((2-methylnon-8-en-3-yn-2-yl)oxy)silane (S60).** 2,6-Lutidine (0.4 mL, 3.4 mmol) and TBSOTf (0.47 mL, 2.0 mmol) were added at –15 °C to a solution of alcohol **S32** (260 mg, 1.7 mmol) in CH<sub>2</sub>Cl<sub>2</sub> (8 mL). The mixture was warmed to ambient temperature over the course of 2 h and stirring was continued for 14 h. The reaction was quenched with sat. NH<sub>4</sub>Cl solution (5 mL), the aqueous phase was extracted with CH<sub>2</sub>Cl<sub>2</sub> (3 x 5 mL) and the combined organic layers were washed with brine, dried over Na<sub>2</sub>SO<sub>4</sub> and concentrated under reduced pressure. The residue was purified by flash chromatography (silica, hexanes/EtOAc 100:1) to give the title compound as a colorless oil (349 mg, 77%). <sup>1</sup>H NMR (400 MHz, CDCl<sub>3</sub>):  $\delta$  5.65 (ddt, *J* = 17.0, 10.2, 6.7 Hz, 1H), 4.88 (ddd, *J* = 17.1, 1.7, 1.7 Hz, 1H), 4.85 – 4.80 (m, 1H), 2.08 – 1.93 (m, 5H), 1.50 – 1.37 (m, 2H), 1.27 (s, 6H), 0.71 (s, 9H), 0.00 (s, 6H). <sup>13</sup>C NMR (101 MHz, CDCl<sub>3</sub>):  $\delta$  138.1, 115.2, 86.1, 82.5, 66.5, 33.4, 33.0, 28.0, 25.9, 25.9, 18.2, 18.1, –2.8. IR (film)  $\tilde{\nu}$  2930, 1247, 1159, 1035, 834, 774  $\text{cm}^{-1}$ . HRMS (CI) for C<sub>16</sub>H<sub>30</sub>O<sub>2</sub>Si [M+H]<sup>+</sup>: calcd: 267.2137, found: 267.2139.

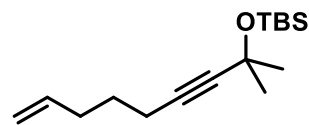

**8-(Methoxymethoxy)-8-methylnon-1-en-6-yne (S61).** Hünig's base (1.17 mL, 6.7 mmol) and MOMCl (0.26 mL, 3.37 mmol) were added at 0 °C to a solution of alcohol **S32** (171 mg, 1.12 mmol) in CH<sub>2</sub>Cl<sub>2</sub> (5 mL). The mixture was warmed to ambient temperature over 2 h and stirring was continued for another 14 h. The reaction was quenched with sat. NH<sub>4</sub>Cl solution (5 mL), the aqueous phase was extracted with CH<sub>2</sub>Cl<sub>2</sub> (3 x 5 mL) and the combined organic layers were washed with sat. NaCl solution, dried over Na<sub>2</sub>SO<sub>4</sub> and concentrated under reduced pressure. The crude product was purified by flash chromatography (silica, hexanes/EtOAc 97:3) to give the title compound as a colorless oil (156 mg, 71%). <sup>1</sup>H NMR (400 MHz, CDCl<sub>3</sub>)  $\delta$  5.78 (ddt, *J* = 17.0, 10.2, 6.7 Hz, 1H), 5.06 – 4.95 (m, 2H), 4.89 (s, 2H), 3.37 (s,

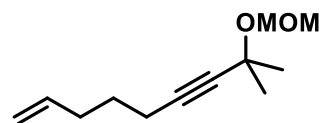



3H), 2.21 (t,  $J = 7.1$  Hz, 2H), 2.18 – 2.11 (m, 2H), 1.64 – 1.56 (m, 2H), 1.48 (s, 6H).  $^{13}\text{C}$  NMR (101 MHz,  $\text{CDCl}_3$ )  $\delta$  138.0, 115.3, 93.2, 85.1, 82.3, 71.4, 55.5, 32.9, 30.7, 28.0, 18.1. IR (film)  $\tilde{\nu}$  2934, 1256, 1144, 1031, 1001, 917, 810  $\text{cm}^{-1}$ . HRMS (ESI<sup>+</sup>) for  $\text{C}_{12}\text{H}_{20}\text{O}_2$   $[\text{M}+\text{Na}]^+$ : calcd: 219.1356, found: 219.1356.

**Trimethyl(2-(((2-methylnon-8-en-3-yn-2-yl)oxy)methoxy)ethyl)silane (S62).** Hünig's base (1.21 mL, 6.9 mmol) and SEMCl (0.62 mL, 3.48 mmol) were added at 0 °C to a solution of alcohol **S32** (176.9 mg, 1.16 mmol) in  $\text{CH}_2\text{Cl}_2$  (5 mL). The mixture was warmed to ambient temperature over 2 h and stirring was continued for another 14 h. The reaction was quenched with sat.  $\text{NH}_4\text{Cl}$  solution (5 mL), the aqueous phase was extracted with  $\text{CH}_2\text{Cl}_2$  (3 x 5 mL) and the combined organic layers were washed with sat. NaCl solution, dried over  $\text{Na}_2\text{SO}_4$  and concentrated under reduced pressure. The residue was purified by flash chromatography (silica, hexanes/EtOAc 100:1) to give the title compound as a colorless oil (311 mg, 95%).  $^1\text{H}$  NMR (400 MHz,  $\text{CDCl}_3$ )  $\delta$  5.79 (ddt,  $J = 16.9, 10.1, 6.7$  Hz, 1H), 5.06 – 4.95 (m, 2H), 4.94 (s, 2H), 3.71 – 3.59 (m, 2H), 2.21 (t,  $J = 7.1$  Hz, 2H), 2.18 – 2.09 (m, 2H), 1.67 – 1.55 (m, 2H), 1.48 (s, 6H), 0.99 – 0.89 (m, 2H), 0.01 (s, 9H).  $^{13}\text{C}$  NMR (101 MHz,  $\text{CDCl}_3$ )  $\delta$  139.2, 116.6, 92.7, 86.2, 83.7, 72.5, 66.6, 34.2, 31.9, 29.3, 19.6, 19.4, 0.0. IR (film)  $\tilde{\nu}$  2953, 1248, 1095, 1027, 919, 857, 834  $\text{cm}^{-1}$ . HRMS (ESI<sup>+</sup>) for  $\text{C}_{16}\text{H}_{30}\text{O}_2\text{Si}$   $[\text{M}+\text{Na}]^+$ : calcd: 305.1907, found: 305.1908.

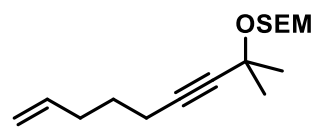

**N-(4-(1-Methoxycyclohexyl)but-3-yn-1-yl)-4-methyl-N-(3-methylbut-2-en-1-yl)benzenesulfonamide (S63).**

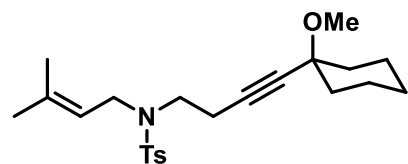

**(S63).** 1-Bromo-3-methyl-2-butene (0.28 mL, 2.4 mmol) was added to a stirred suspension of  $\text{K}_2\text{CO}_3$  (494 mg, 3.6 mmol) and sulfonamide **S33** (400 mg, 1.2 mmol) in MeCN (3.8 mL). The mixture was stirred at 60 °C for 2 h before additional  $\text{K}_2\text{CO}_3$  (494 mg, 3.6 mmol) and 1-bromo-3-methyl-2-butene (0.28 mL, 2.4 mmol) were added. After stirring for another 18 h at 60 °C, the mixture was cooled to room temperature and diluted with MeCN (10 mL). The suspension was filtered through a plug of cotton wool and the filtrate was evaporated. The residue was purified by flash chromatography (silica, hexanes/EtOAc 20:1 – 10:1 – 6:1) to yield the title compound as pale yellow oil (306 mg, 64%).  $^1\text{H}$  NMR (400 MHz,  $\text{CDCl}_3$ )  $\delta$  7.71 – 7.66 (m, 2H), 7.32 – 7.27 (m, 2H), 5.01 (tdq,  $J = 7.1, 2.8, 1.4$  Hz, 1H), 3.82 (d,  $J = 7.1$  Hz, 2H), 3.31 (s, 3H), 3.28 – 3.22 (m, 2H), 2.53 – 2.47 (m, 2H), 2.42 (s, 3H), 1.85 – 1.77 (m, 2H), 1.66 (q,  $J = 1.2$  Hz, 3H), 1.65 – 1.57 (m, 5H), 1.57 – 1.41 (m, 5H), 1.32 – 1.22 (m, 1H).  $^{13}\text{C}$  NMR (101 MHz,  $\text{CDCl}_3$ )  $\delta$  143.3, 137.4, 137.3, 129.7, 127.3, 119.1, 83.0, 82.8, 74.0, 50.6, 46.5, 46.2, 36.9, 25.9, 25.6, 22.9, 21.6, 19.8, 17.9. IR (film)  $\tilde{\nu}$  2933, 2857, 1448, 1341, 1157  $\text{cm}^{-1}$ . HRMS (ESI<sup>+</sup>) for  $\text{C}_{23}\text{H}_{33}\text{NO}_3\text{S}$   $[\text{M}+\text{Na}]^+$ : calcd: 426.1073, found: 426.2072.

**N-Allyl-N-(4-(1-methoxycyclohexyl)but-3-yn-1-yl)-4-methylbenzenesulfonamide (S64).** Allyl bromide (0.08 mL, 0.95 mmol) was added to a stirred suspension of  $\text{K}_2\text{CO}_3$  (131 mg, 0.95 mmol) and sulfonamide **S33** (160 mg, 0.48 mmol) in MeCN (0.8 mL). After stirring for 18 h at 60 °C the mixture was allowed to cool to ambient temperature and diluted with MeCN (10 mL). The suspension was filtered through a plug of cotton wool and the filtrate was concentrated under reduced pressure. The crude product was purified by flash chromatography (silica, hexanes/EtOAc 20:1 – 10:1 – 6:1) to yield the title compound as a colorless oil (105 mg, 59%).  $^1\text{H}$  NMR

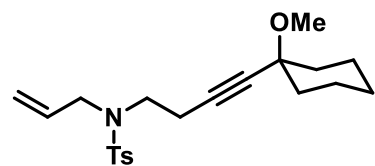

(400 MHz, CDCl<sub>3</sub>) δ 7.75 – 7.68 (m, 2H), 7.33 – 7.28 (m, 2H), 5.66 (ddt, *J* = 17.1, 10.1, 6.3 Hz, 1H), 5.23 – 5.14 (m, 2H), 3.85 (dt, *J* = 6.3, 1.4 Hz, 2H), 3.32 – 3.26 (m, 5H), 2.55 – 2.48 (m, 2H), 2.43 (s, 3H), 1.86 – 1.76 (m, 2H), 1.67 – 1.42 (m, 7H), 1.35 – 1.23 (m, 1H). <sup>13</sup>C NMR (101 MHz, CDCl<sub>3</sub>) δ 143.5, 137.2, 133.2, 129.9, 127.3, 119.2, 83.1, 82.6, 74.0, 51.4, 50.7, 46.5, 36.9, 25.6, 22.9, 21.7, 19.7. IR (film)  $\tilde{\nu}$  2935, 2857, 1449, 1345, 1158, 1092 cm<sup>-1</sup>. HRMS (ESI<sup>+</sup>) for C<sub>21</sub>H<sub>29</sub>NO<sub>3</sub>S [M+Na]<sup>+</sup>: calcd: 398.1760, found: 398.1762.

**N-(4,5-bis((*tert*-Butyldimethylsilyl)oxy)-4-methylpent-2-yn-1-yl)-4-methyl-N-(3-methylbut-2-en-1-yl)benzenesulfonamide (S65).** TBSOTf (0.15 mL, 0.64 mmol) was added to a solution of alcohol **S35**

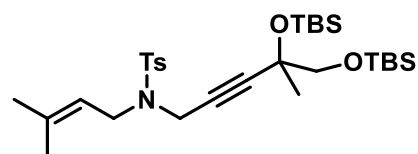

(250 mg, 0.054 mmol) and 2,6-lutidine (0.13 mL, 1.07 mmol) in CH<sub>2</sub>Cl<sub>2</sub> (2.1 mL) at -78 °C. The mixture was allowed to reach room temperature and stirring was continued for 2 h before sat. NH<sub>4</sub>Cl solution (0.5 mL) was added. The layers were separated and the aqueous phase was extracted with CH<sub>2</sub>Cl<sub>2</sub> (3 x 5 mL). The combined organic layers were washed with brine and dried over MgSO<sub>4</sub>. The solvent was evaporated and the residue purified by flash chromatography (silica, hexanes/EtOAc 1:0 – 20:1) to yield the title compound as a light yellow oil (281 mg, 90%). <sup>1</sup>H NMR (400 MHz, CDCl<sub>3</sub>) δ 7.75 – 7.70 (m, 2H), 7.30 – 7.26 (m, 2H), 5.12 (tdq, *J* = 7.2, 2.9, 1.3 Hz, 1H), 4.10 (s, 2H), 3.82 (d, *J* = 7.2 Hz, 2H), 3.29 (s, 2H), 2.41 (s, 3H), 1.71 (d, *J* = 1.3 Hz, 3H), 1.68 (d, *J* = 1.3 Hz, 3H), 1.18 (s, 3H), 0.87 (s, 9H), 0.82 (s, 9H), 0.07 (s, 3H), 0.06 (s, 3H), 0.02 (s, 6H). <sup>13</sup>C NMR (101 MHz, CDCl<sub>3</sub>) δ 143.2, 138.7, 136.9, 129.6, 127.8, 118.3, 88.5, 77.4, 71.6, 70.0, 44.0, 35.9, 27.2, 26.0, 26.0, 25.8, 21.7, 18.5, 18.1, -2.7, -2.9, -5.2. IR (film)  $\tilde{\nu}$  2929, 2857, 1351, 1162, 1112 cm<sup>-1</sup>. HRMS (ESI<sup>+</sup>) for C<sub>30</sub>H<sub>53</sub>NO<sub>4</sub>Si<sub>2</sub> [M+Na]<sup>+</sup>: calcd: 602.3126, found: 602.3128.

**N-(3-(5-Methoxy-2,2-dimethyl-1,3-dioxan-5-yl)prop-2-yn-1-yl)-4-methyl-N-(3-methylbut-2-en-1-yl)benzenesulfonamide (S66).** *n*-BuLi (1.6 M in hexanes, 1.00 mL, 1.60 mmol) was slowly added to a

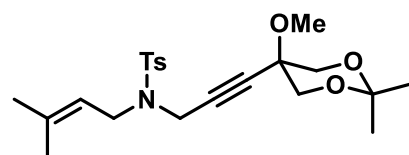

solution of alkyne **S14** (400 mg, 1.44 mmol) in THF (12 mL) at 0 °C and the resulting mixture was stirred for 30 min at that temperature before 2,2-dimethyl-1,3-dioxan-5-one (282 mg, 2.17 mmol) in THF (1 mL) was introduced. The mixture was allowed to reach room temperature and stirring continued for 30 min before sat. NH<sub>4</sub>Cl solution (5 mL) was added. The layers were separated and the aqueous phase was extracted with EtOAc (3 x 30 mL). The combined organic layers were washed with brine and dried over MgSO<sub>4</sub>. The solvent was evaporated and the crude product was purified by flash chromatography (silica, hexanes/EtOAc 4:1 – 2:1) to yield the tertiary alcohol (241 mg, 41 %) which was immediately used in the next step.

NaH (43 mg, 1.77 mmol) was added to a solution of this alcohol (241 mg, 0.59 mmol) in THF (2.5 mL) at room temperature. The suspension was stirred for 10 min before MeI (0.22 mL, 3.53 mmol) was slowly added. Stirring was continued for 1 h before water (2 mL) and EtOAc (30 mL) were introduced. The aqueous phase was extracted with EtOAc (2 x 30 mL) and the combined organic phases were washed with brine and dried over MgSO<sub>4</sub>. The solvent was removed under reduced pressure and the residue was purified by flash chromatography (silica, hexanes/EtOAc 45:1) to yield the title compound as a pale yellow oil (151 mg, 61%). <sup>1</sup>H NMR (400 MHz, CDCl<sub>3</sub>) δ 7.75 – 7.70 (m, 2H), 7.33 – 7.29 (m, 2H), 5.12 (m, 1H), 4.14 (s, 2H), 3.82 (d, *J* = 7.3 Hz, 2H), 3.67 (dt, *J* = 12.7, 0.9 Hz, 2H), 3.60 (dt, *J* = 12.2, 1.0 Hz, 2H), 3.17 (s, 3H), 2.42 (s, 3H), 1.73 (d, *J* = 1.3 Hz, 3H), 1.68 (d, *J* = 1.3 Hz, 3H), 1.39 (s, 3H), 1.39 (s, 3H). <sup>13</sup>C NMR (101 MHz,

CDCl<sub>3</sub>) δ 143.6, 139.2, 136.5, 129.7, 127.9, 118.0, 98.4, 81.6, 81.4, 67.0, 65.4, 51.8, 44.2, 35.7, 26.6, 26.0, 21.7, 20.3, 18.0. IR (neat)  $\tilde{\nu}$  2990, 2930, 1450, 1346, 1159, 1090 cm<sup>-1</sup>. HRMS (ESI<sup>+</sup>) for C<sub>22</sub>H<sub>31</sub>NO<sub>5</sub>S [M+Na]<sup>+</sup>: calcd 444.1815, found 444.1817.

**4-Methyl-N-(3-(2-methyl-1,3-dioxolan-2-yl)prop-2-yn-1-yl)-N-(3-methylbut-2-en-1-yl)benzenesulfonamide (S67).** *p*-TsOH · H<sub>2</sub>O (7.4 mg, 0.04 mmol) was added to a vigorously stirred suspension of ynone **S36**

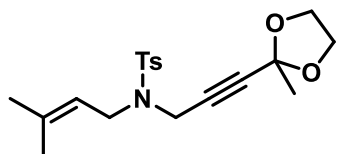

(125 mg, 0.39 mmol) and triethylorthoformate (70 mg, 0.47 mmol) in ethylene glycol (1.9 mL). The mixture was stirred at room temperature for 24 h before solid NaHCO<sub>3</sub> (30 mg) and sat. aq. NaHCO<sub>3</sub> solution (1 mL) were added. The mixture was diluted with EtOAc (20 mL) and water (5 mL), the layers were separated, the aqueous phase was extracted with EtOAc (2 x 30 mL) and the combined organic layers were washed with brine and dried over MgSO<sub>4</sub>. The solvent was evaporated and the residue purified by flash chromatography (silica, hexanes/EtOAc 10:1 – 6:1 – 4:1) to give the title compound as a colorless amorphous solid (116 mg, 82%). <sup>1</sup>H NMR (400 MHz, CDCl<sub>3</sub>) δ 7.76 – 7.71 (m, 2H), 7.34 – 7.29 (m, 2H), 5.10 (tdq, *J* = 7.2, 2.9, 1.4 Hz, 1H), 4.11 (s, 2H), 3.91 – 3.83 (m, 2H), 3.82 – 3.77 (m, 4H), 2.42 (s, 3H), 1.72 (d, *J* = 1.2 Hz, 3H), 1.67 (d, *J* = 1.3 Hz, 3H), 1.43 (s, 3H). <sup>13</sup>C NMR (101 MHz, CDCl<sub>3</sub>) δ 143.5, 139.1, 136.3, 129.7, 127.8, 118.1, 100.5, 83.9, 76.3, 64.6, 44.2, 35.6, 26.2, 26.0, 21.7, 18.0. IR (film)  $\tilde{\nu}$  2973, 2895, 1347, 1185, 1161 cm<sup>-1</sup>. HRMS (ESI<sup>+</sup>) for C<sub>19</sub>H<sub>25</sub>NO<sub>4</sub>S [M+Na]<sup>+</sup>: calcd: 386.1397, found: 386.1399.

**4-Methyl-N-(3-methylbut-2-en-1-yl)-N-(3-(2,2,4-trimethyl-1,3-dioxolan-4-yl)prop-2-yn-1-yl)benzenesulfonamide (S68).** TBAF (1 M in THF, 0.82 mL, 0.82 mmol) was added to a solution of silyl ether **S65**

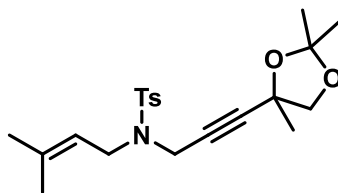

(190 mg, 0.41 mmol) in THF (4 mL) at 0 °C. The mixture was allowed to reach room temperature and stirring was continued for 30 min before sat. NH<sub>4</sub>Cl solution (1 mL) and water (1 mL) were introduced. The layers were separated and the aqueous phase was extracted with EtOAc (3 x 10 mL). The combined organic layers were washed with brine and dried over MgSO<sub>4</sub>. The solvent was evaporated and the crude product was filtered through a short plug of silica, eluting with hexanes/EtOAc (1:2). The crude product was used in the next step without further purification. *p*-TsOH (6.8 mg, 0.04 mmol) was added to a solution of the crude diol and 2,2-dimethoxypropane (0.09 mL, 0.72 mmol) in acetone (1.0 mL) at room temperature. The mixture was stirred for 18 h at room temperature before sat. aq. NaHCO<sub>3</sub> solution (0.5 mL) was added. The mixture was extracted with EtOAc (3 x 10 mL) and the combined organic layers were washed with brine and dried over MgSO<sub>4</sub>. The solvent was evaporated and the residue purified by flash chromatography (silica, hexanes/EtOAc 10:1 – 4:1) to obtain the title compound as a colorless oil (121 mg, 76%). <sup>1</sup>H NMR (400 MHz, CDCl<sub>3</sub>) δ 7.75 – 7.70 (m, 2H), 7.32 – 7.27 (m, 2H), 5.11 (tdq, *J* = 7.2, 2.9, 1.5 Hz, 1H), 4.10 (s, 2H), 3.80 (d, *J* = 7.2 Hz, 2H), 3.76 (d, *J* = 8.1 Hz, 1H), 3.57 (d, *J* = 8.1 Hz, 1H), 2.42 (s, 3H), 1.72 (d, *J* = 1.4 Hz, 3H), 1.67 (d, *J* = 1.3 Hz, 3H), 1.34 (s, 6H), 1.27 (s, 3H). <sup>13</sup>C NMR (101 MHz, CDCl<sub>3</sub>) δ 143.4, 139.0, 136.6, 129.7, 127.9, 118.1, 110.8, 87.4, 75.5, 73.5, 44.1, 35.8, 27.1, 26.8, 26.2, 26.0, 21.7, 18.1. IR (film)  $\tilde{\nu}$  2985, 1452, 1346, 1203, 1093, 1062 cm<sup>-1</sup>. HRMS (ESI<sup>+</sup>) for C<sub>21</sub>H<sub>29</sub>NO<sub>4</sub>S [M+Na]<sup>+</sup>: calcd 414.1710, found 414.1715.

**N-(4-Methoxyhex-2-yn-1-yl)-4-methyl-N-(3-methylbut-2-en-1-yl)benzenesulfonamide (S69).** A solution

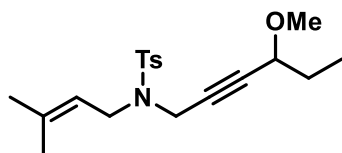

of alcohol **S37** in THF (3 mL) was slowly added to a suspension of NaH (214 mg, 8.9 mmol) in THF (7.7 mL) at 0 °C. The mixture was stirred for 10 min at room temperature before MeI (1.12 mL, 17.9 mmol) was carefully added at 0 °C. After stirring for another 1 h at room temperature, water (1 mL) and *tert*-butyl methyl ether (10 mL) were introduced and the

layers were separated. The aqueous phase was extracted with *tert*-butyl methyl ether (2 x 50 mL), the combined organic layers were washed with brine and dried over MgSO<sub>4</sub>, the solvent was removed under reduced pressure and the crude product was purified by flash chromatography (silica, hexanes/EtOAc 20:1 – 10:1 – 5:1) to yield the title compound as a colorless oil (235 mg, 40% over two steps). <sup>1</sup>H NMR (400 MHz, CDCl<sub>3</sub>) δ 7.76 – 7.71 (m, 2H), 7.30 – 7.26 (m, 2H), 5.12 (tdq, *J* = 7.1, 2.8, 1.4 Hz, 1H), 4.14 (d, *J* = 1.8 Hz, 2H), 3.81 (d, *J* = 7.3 Hz, 2H), 3.61 (tt, *J* = 6.3, 1.8 Hz, 1H), 3.18 (s, 2H), 2.41 (s, 3H), 1.72 (d, *J* = 1.3 Hz, 3H), 1.67 (d, *J* = 1.3 Hz, 3H), 1.57 – 1.36 (m, 2H), 0.81 (t, *J* = 7.4 Hz, 3H). <sup>13</sup>C NMR (101 MHz, CDCl<sub>3</sub>) δ 143.4, 139.0, 136.5, 129.6, 127.9, 118.2, 84.1, 79.1, 72.4, 56.4, 44.1, 35.8, 28.6, 26.0, 21.6, 18.0, 9.7. IR (film)  $\tilde{\nu}$  2971, 2932, 1449, 1343, 1159 cm<sup>-1</sup>. HRMS (ESI<sup>+</sup>) for C<sub>19</sub>H<sub>27</sub>NO<sub>3</sub>S [M+Na]<sup>+</sup>: calcd: 372.1604, found: 372.1604.

**N-(4-Methoxybut-2-yn-1-yl)-4-methyl-N-(3-methylbut-2-en-1-yl)benzenesulfonamide (S70).** A solution

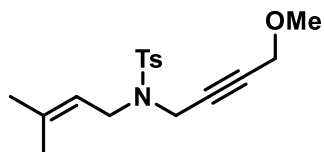

of alcohol **S38** (150 mg, 0.49 mmol) in THF (2 mL) was slowly added to a suspension of NaH (59 mg, 2.4 mmol) in THF (2.1 mL) at 0 °C. The mixture was stirred for 10 min at room temperature before MeI (0.31 mL, 4.9 mmol) was carefully added at 0 °C. Stirring was continued for 1 h at room

temperature before water (0.5 mL) and *tert*-butyl methyl ether (10 mL) were introduced and the layers were separated. The aqueous phase was extracted with *tert*-butyl methyl ether (2 x 30 mL) and the combined organic layers were washed with brine and dried over MgSO<sub>4</sub>. The solvent was evaporated and the crude product purified by flash chromatography (silica, hexanes/EtOAc 20:1 – 10:1 – 5:1) to yield the title compound as a colorless oil (126 mg, 80%). <sup>1</sup>H NMR (400 MHz, CDCl<sub>3</sub>) δ 7.76 – 7.71 (m, 2H), 7.32 – 7.27 (m, 2H), 5.11 (tdq, *J* = 7.1, 2.8, 1.4 Hz, 1H), 4.10 (t, *J* = 1.9 Hz, 2H), 3.82 (t, *J* = 1.9 Hz, 2H), 3.80 (d, *J* = 7.3 Hz, 3H), 3.18 (s, 3H), 2.42 (s, 3H), 1.72 (d, *J* = 1.3 Hz, 3H), 1.66 (d, *J* = 1.3 Hz, 3H). <sup>13</sup>C NMR (101 MHz, CDCl<sub>3</sub>) δ 143.4, 139.1, 136.3, 129.5, 128.0, 118.1, 81.2, 79.8, 59.7, 57.5, 44.2, 35.9, 26.0, 21.7, 18.0. IR (film)  $\tilde{\nu}$  2975, 2926, 1598, 1343, 1090 cm<sup>-1</sup>. HRMS (ESI<sup>+</sup>) for C<sub>17</sub>H<sub>23</sub>NO<sub>3</sub>S [M+Na]<sup>+</sup>: calcd: 344.1291, found: 344.1294.

**1-Methoxy-1-(3-methoxy-7-methyloct-6-en-1-yn-1-yl)cyclohexane (S71).** A solution of alcohol **S39**

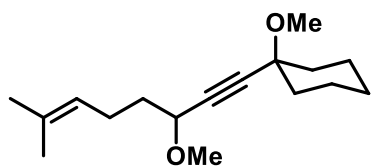

(200 mg, 0.8 mmol) in THF (1 mL) was added to a stirred suspension of NaH (96 mg, 4.0 mmol) in THF (3.2 mL) at 0 °C. The mixture was stirred for 10 min at room temperature before MeI (0.50 mL, 8.0 mmol) was introduced. After stirring for 1 h at room temperature, sat. aq. NH<sub>4</sub>Cl solution (2 mL), water (4 mL) and *tert*-butyl methyl ether (30 mL) were

introduced and the layers separated. The aqueous phase was extracted with *tert*-butyl methyl ether (2 x 30 mL) and the combined organic layers were washed with brine and dried over MgSO<sub>4</sub>. The solvent was removed under reduced pressure and the crude product was purified by flash chromatography (silica, hexanes/EtOAc 1:0 – 20:1) to give the title compound as a colorless oil (184 mg, 87%). <sup>1</sup>H NMR (400 MHz,

CDCl<sub>3</sub>) δ 5.11 (tdq, *J* = 7.3, 2.9, 1.4 Hz, 1H), 4.00 (t, *J* = 6.6 Hz, 1H), 3.40 (s, 3H), 3.37 (s, 3H), 2.19 – 2.10 (m, 2H), 1.95 – 1.86 (m, 2H), 1.82 – 1.71 (m, 2H), 1.69 (d, *J* = 1.0 Hz, 3H), 1.70 – 1.60 (m, 2H), 1.62 (s, 3H), 1.60 – 1.47 (m, 5H), 1.35 – 1.19 (m, 1H). <sup>13</sup>C NMR (101 MHz, CDCl<sub>3</sub>) δ 132.6, 123.5, 87.0, 85.1, 74.2, 70.9, 56.5, 50.8, 37.0, 36.0, 25.9, 25.6, 24.1, 23.1, 17.8. IR (film)  $\tilde{\nu}$  2934, 2857, 1447, 1290, 1094 cm<sup>-1</sup>. HRMS (EI) for C<sub>17</sub>H<sub>28</sub>O<sub>2</sub> [M]<sup>+</sup>: calcd: 264.1084, found: 264.2085.

**1-Methoxy-1-(3-((3-methylbut-2-en-1-yl)oxy)prop-1-yn-1-yl)cyclohexane (S72).** A solution of alcohol **S51**

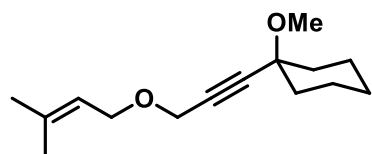

(360 mg, 2.1 mmol) in THF (1 mL) was added to a stirred suspension of NaH (87 mg, 3.6 mmol) in THF (13.9 mL) at 0 °C. The mixture was stirred for 10 min at room temperature before 1-bromo-3-methyl-2-butene (0.30 mL, 2.6 mmol) was added. After stirring for 1 h at room temperature, the reaction was quenched with sat. aq. NH<sub>4</sub>Cl solution (2 mL), water (4 mL) and *tert*-butyl methyl ether (30 mL). The aqueous phase was extracted with *tert*-butyl methyl ether (2 x 50 mL) and the combined organic layers were washed with brine and dried over MgSO<sub>4</sub>. The solvent was removed under reduced pressure and the crude product was purified by flash chromatography (silica, hexanes/EtOAc 40:1 – 20:1) to give the title compound as a colorless oil (266 mg, 53%). <sup>1</sup>H NMR (400 MHz, CDCl<sub>3</sub>) δ 5.35 (tdq, *J* = 7.1, 2.8, 1.4 Hz, 1H), 4.20 (s, 2H), 4.06 (d, *J* = 7.1 Hz, 2H), 3.36 (s, 3H), 1.94 – 1.82 (m, 2H), 1.76 (s, 3H), 1.70 (s, 3H), 1.69 – 1.45 (m, 7H), 1.37 – 1.23 (m, 1H). <sup>13</sup>C NMR (101 MHz, CDCl<sub>3</sub>) δ 138.4, 120.5, 87.3, 82.2, 74.1, 65.9, 57.28, 50.9, 36.8, 26.0, 25.6, 22.9, 18.2. IR (film)  $\tilde{\nu}$  2933, 2856, 1674, 1446, 1073 cm<sup>-1</sup>. HRMS (ESI<sup>+</sup>) for C<sub>15</sub>H<sub>24</sub>O<sub>2</sub> [M+Na]<sup>+</sup>: calcd: 259.1668, found: 259.1669.

**Dimethyl 2-(3-(1-methoxycyclohexyl)prop-2-yn-1-yl)-2-(3-methylbut-2-en-1-yl)malonate (S73).** A

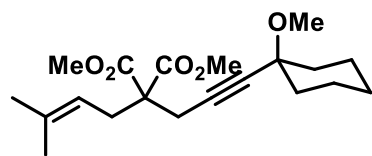

solution of alcohol **S41** (180 mg, 0.54 mmol) in THF (1 mL) was slowly added to a suspension of NaH (64 mg, 2.7 mmol) in THF (2.2 mL) at 0 °C. The mixture was stirred for 10 min at room temperature before MeI (0.34 mL, 5.4 mmol) was carefully added at 0 °C. After stirring for 1 h at room temperature, water (0.5 mL) and *tert*-butyl methyl ether (10 mL) were introduced and the layers were separated. The aqueous phase was extracted with *tert*-butyl methyl ether (2 x 30 mL) and the combined organic layers were washed with brine and dried over MgSO<sub>4</sub>. The solvent was evaporated and the residue was purified by flash chromatography (silica, hexanes/EtOAc 40:1 – 20:1 – 15:1) to yield the title compound as a colorless oil (84 mg, 45%). <sup>1</sup>H NMR (400 MHz, CDCl<sub>3</sub>) δ 4.91 (dddd, *J* = 9.2, 5.9, 2.9, 1.5 Hz, 1H), 3.72 (s, 6H), 3.31 (s, 3H), 2.83 (s, 2H), 2.77 (d, *J* = 7.8 Hz, 2H), 1.88 – 1.77 (m, 2H), 1.70 (d, *J* = 1.3 Hz, 3H), 1.65 (d, *J* = 1.3 Hz, 3H), 1.64 – 1.41 (m, 8H), 1.31 – 1.23 (m, 2H). <sup>13</sup>C NMR (101 MHz, CDCl<sub>3</sub>) δ 170.7, 136.9, 117.3, 84.2, 81.2, 74.1, 57.6, 52.8, 50.7, 37.0, 31.0, 26.2, 25.6, 23.0, 22.9, 18.1. IR (film)  $\tilde{\nu}$  2935, 2857, 1738, 1437, 1224 cm<sup>-1</sup>. HRMS (ESI<sup>+</sup>) for C<sub>20</sub>H<sub>30</sub>O<sub>5</sub> [M+Na]<sup>+</sup>: calcd: 373.1985, found: 373.1983.

**5-Methoxy-2,5-dimethylpentadec-2-en-6-yne (S74).** *n*-BuLi (1.6 M in hexanes, 0.60 mL, 0.96 mmol) was

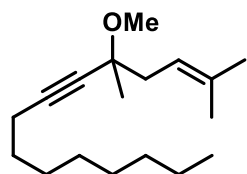

slowly added to a stirred suspension of isopropyltriphenylphosphonium iodide (492 mg, 1.14 mmol) in THF (5.7 mL) at 0 °C. The mixture was stirred for 30 min at 0 °C before a solution of aldehyde **S46** (208 mg, 0.88 mmol) in THF (1.4 mL) was added. After stirring at 0 °C for 1 h, sat. NH<sub>4</sub>Cl solution (2 mL) and *tert*-butyl methyl

ether (10 mL) were introduced and the layers separated. The aqueous phase was extracted with *tert*-butyl methyl ether (2 x 30 mL) and the combined organic layers were dried over MgSO<sub>4</sub>. The solvent was evaporated and the residue purified by flash chromatography (silica, hexanes/EtOAc 1:0 – 75:1 – 50:1) to yield the title compound as a colorless oil (55 mg, 24%). <sup>1</sup>H NMR (400 MHz, CDCl<sub>3</sub>) δ 5.24 (tdq, *J* = 7.2, 2.9, 1.4 Hz, 1H), 3.35 (s, 3H), 2.43 – 2.30 (m, 2H), 2.21 (t, *J* = 7.0 Hz, 2H), 1.74 (q, *J* = 1.3 Hz, 3H), 1.63 (s, 3H), 1.55 – 1.46 (m, 2H), 1.43 – 1.36 (m, 2H), 1.34 (s, 3H), 1.32 – 1.23 (m, 8H), 0.91 – 0.86 (t, *J* = 7.0 Hz, 3H). <sup>13</sup>C NMR (101 MHz, CDCl<sub>3</sub>) δ 134.2, 119.5, 85.9, 81.4, 74.0, 51.4, 39.8, 32.0, 29.4, 29.2, 29.0, 26.2, 25.9, 22.8, 18.8, 18.3, 14.3. IR (film)  $\tilde{\nu}$  2928, 2857, 1458, 1367, 1089 cm<sup>-1</sup>. HRMS (ESI<sup>+</sup>) for C<sub>18</sub>H<sub>32</sub>O [M+H]<sup>+</sup>: calcd: 265.2526, found: 265.2526.

**1-(1-Methoxycyclohexyl)-5,5,7-trimethyloct-6-en-1-yn-3-one (S75).** *n*-BuLi (1.6 M in hexanes, 0.64 mL,

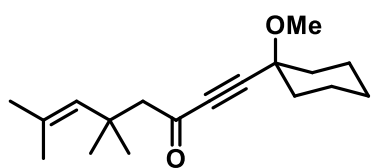

1.02 mmol) was added dropwise to a stirred solution of alkyne **S1** (153 mg, 1.11 mmol) in THF (3.5 ml) at 0 °C and the resulting mixture was stirred for 20 min at that temperature. The mixture was cooled to – 78 °C and a solution of amide **37** (170 mg, 0.85 mmol) in THF (0.6 mL) was added. The mixture was allowed to reach – 10 °C and stirring was

continued for 1 h at that temperature. Sat. NH<sub>4</sub>Cl solution (1 mL) and EtOAc (3 mL) were introduced and the layers separated. The aqueous phase was extracted with EtOAc (3 x 10 mL) and the combined organic layers were washed with brine and dried over MgSO<sub>4</sub>. The solvent was evaporated and excess alkyne removed under high vacuum (10<sup>-3</sup> mbar, rt). The residue was purified by flash chromatography (silica, hexanes/EtOAc 1:0 – 40:1) to give the title compound as a colorless oil (201 mg, 85%). <sup>1</sup>H NMR (400 MHz, CDCl<sub>3</sub>) δ 5.22 (hept, *J* = 1.4 Hz, 1H), 3.37 (s, 3H), 2.68 (s, 2H), 1.92 (m, 2H), 1.73 (d, *J* = 1.4 Hz, 3H), 1.68 (d, *J* = 1.4 Hz, 3H), 1.67 – 1.44 (m, 7H), 1.39 – 1.29 (m, 1H), 1.24 (s, 6H). <sup>13</sup>C NMR (101 MHz, CDCl<sub>3</sub>) δ 187.1, 132.3, 132.0, 92.6, 86.7, 73.9, 58.0, 51.4, 36.2, 35.7, 29.5, 28.2, 25.4, 22.6, 19.2. IR (film)  $\tilde{\nu}$  2935, 2860, 2204, 1667, 1447, 1094, 1079 cm<sup>-1</sup>. HRMS (CI<sup>+</sup>) for C<sub>18</sub>H<sub>28</sub>O<sub>2</sub> [M+H]<sup>+</sup>: calcd 277.2162, found 277.2159.

**3-Methylbut-2-en-1-yl 3-(1-methoxycyclohexyl)propiolate (S76).** A solution of alcohol **S47** (300 mg,

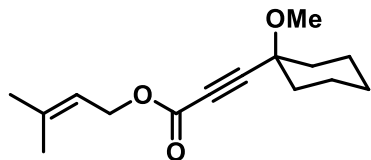

1.27 mmol) in THF (1 mL) was slowly added to a suspension of NaH (152 mg, 6.3 mmol) in THF (5.5 mL) at 0 °C. The mixture was stirred for 10 min at room temperature before MeI (0.80 mL, 12.7 mmol) was carefully added at 0 °C. Stirring was continued for 1 h at room temperature before water (2 mL) and *tert*-butyl methyl ether (30 mL)

were introduced. The aqueous phase was extracted with *tert*-butyl methyl ether (2 x 50 mL) and the combined organic layers were washed with brine and dried over MgSO<sub>4</sub>. The solvent was evaporated and the residue was purified by flash chromatography (silica, hexanes/EtOAc 20:1 – 10:1) to yield the title compound as a colorless oil (129 mg, 41%). <sup>1</sup>H NMR (400 MHz, CDCl<sub>3</sub>) δ 5.37 (ddp, *J* = 8.8, 5.7, 1.4 Hz, 1H), 4.67 (dt, *J* = 7.3, 0.9 Hz, 2H), 3.37 (s, 3H), 1.98 – 1.85 (m, 2H), 1.77 (d, *J* = 1.2 Hz, 3H), 1.73 (d, *J* = 1.3 Hz, 3H), 1.73 – 1.58 (m, 4H), 1.59 – 1.44 (m, 4H), 1.38 – 1.25 (m, 2H). <sup>13</sup>C NMR (101 MHz, CDCl<sub>3</sub>) δ 153.8, 140.4, 117.8, 88.5, 77.9, 73.9, 63.0, 51.4, 36.1, 26.0, 25.3, 22.5, 18.2. IR (film)  $\tilde{\nu}$  2937, 2860, 2238, 1711, 1230 cm<sup>-1</sup>. HRMS (ESI<sup>+</sup>) for C<sub>15</sub>H<sub>23</sub>O<sub>3</sub> [M+Na]<sup>+</sup>: calcd: 273.1461, found: 273.1459.

**Dimethyl 2-(3-(1-methoxycyclohexyl)prop-2-yn-1-yl)-2-(4-methylpent-3-en-1-yl)malonate (S77).** A

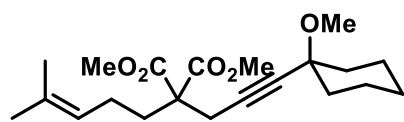

solution of alcohol **S49** (340 mg, 0.97 mmol) in THF (1 mL) was slowly added to a suspension of NaH (70 mg, 2.9 mmol) in THF (3.9 mL) at 0 °C. The mixture was stirred for 10 min at room temperature before MeI (0.31 mL, 4.9 mmol) was carefully added at 0 °C. Stirring was continued for 1 h at room temperature before water (1 mL) and *tert*-butyl methyl ether (20 mL) were introduced and the layers were separated. The aqueous phase was extracted with *tert*-butyl methyl ether (2 x 50 mL) and the combined organic layers were washed with brine and dried over MgSO<sub>4</sub>. The solvent was evaporated and the residue purified by flash chromatography (silica, hexanes/EtOAc 20:1 – 10:1 – 5:1) to yield the title compound as a colorless oil (263 mg, 74%). <sup>1</sup>H NMR (400 MHz, CDCl<sub>3</sub>) δ 5.08 (tdq, *J* = 7.2, 2.9, 1.4 Hz, 1H), 3.72 (s, 6H), 3.31 (s, 3H), 2.90 (s, 2H), 2.12 – 2.00 (m, 2H), 1.93 – 1.78 (m, 4H), 1.70 – 1.56 (m, 3H), 1.67 (q, *J* = 1.9 Hz, 3H), 1.58 (s, 3H), 1.55 – 1.40 (m, 6H), 1.30 – 1.18 (m, 1H). <sup>13</sup>C NMR (101 MHz, CDCl<sub>3</sub>) δ 171.0, 132.8, 123.0, 84.3, 80.9, 74.2, 57.2, 52.8, 50.7, 37.0, 32.3, 25.8, 25.6, 23.2, 23.0, 22.9, 17.7. IR (film)  $\tilde{\nu}$  2934, 2857, 1735, 1436, 1167 cm<sup>-1</sup>. HRMS (ESI<sup>+</sup>) for C<sub>21</sub>H<sub>32</sub>O<sub>5</sub> [M+Na]<sup>+</sup>: calcd: 387.2142, found: 387.2142.

**6-Methoxy-2,6-dimethylhexadec-2-en-7-yne (S78).** A solution of alcohol **S50** (300 mg, 1.13 mmol) in THF

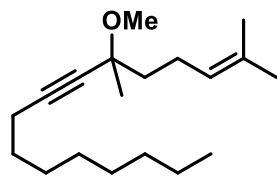

(1 mL) was added to a stirred suspension of NaH (68 mg, 2.84 mmol) in THF (4.9 mL) at 0 °C. The mixture was stirred for 10 min at room temperature before MeI (0.36 mL, 5.67 mmol) was added. Stirring was continued for 1 h at room temperature before sat. aq. NH<sub>4</sub>Cl solution (2 mL), water (2 mL) and *tert*-butyl methyl ether (20 mL) were introduced. The layers were separated, the aqueous phase was extracted with *tert*-butyl methyl ether (2 x 30 mL) and the combined organic layers were washed with brine and dried over MgSO<sub>4</sub>. The solvent was evaporated and the residue purified by flash chromatography (silica, hexanes/EtOAc 1:0 – 20:1) to give the product as a colorless oil (284 mg, 90%). <sup>1</sup>H NMR (400 MHz, CDCl<sub>3</sub>) δ 5.13 (tdq, *J* = 7.2, 2.9, 1.4 Hz, 1H), 3.33 (s, 3H), 2.21 (t, *J* = 7.0 Hz, 2H), 2.17 – 2.06 (m, 3H), 1.68 (q, *J* = 1.2 Hz, 3H), 1.67 – 1.58 (m, 2H), 1.62 (d, *J* = 1.2 Hz, 3H), 1.54 – 1.46 (m, 2H), 1.42 – 1.35 (m, 2H), 1.37 (s, 3H), 1.33 – 1.23 (m, 8H), 0.91 – 0.86 (m, 3H). <sup>13</sup>C NMR (101 MHz, CDCl<sub>3</sub>) δ 131.8, 124.3, 86.0, 81.2, 73.7, 51.3, 41.6, 32.0, 29.4, 29.2, 29.0, 29.0, 26.1, 25.9, 23.4, 22.8, 18.8, 17.8, 14.3. IR (film)  $\tilde{\nu}$  2926, 2856, 1459, 1173, 1088, 1073 cm<sup>-1</sup>. HRMS (ESI<sup>+</sup>) for C<sub>19</sub>H<sub>34</sub>O [M+H]<sup>+</sup>: calcd: 279.2682, found: 279.2680.

## CYCLOPROPANATION AND METATHESIS REACTIONS

**Representative Procedure A. Preparation of Cycloalkene 2a.** [Cp\*RuCl]<sub>4</sub> (2.3 mg, 2 mol%) was added to a stirred solution of enyne **1a** (24.8 mg, 0.11 mmol) in 1,2-dichloroethane (1 mL, 0.1 M) in a flame dried Schlenk tube under argon. H<sub>2</sub> was bubbled through the mixture for 2 min before the flask was immersed into a pre-heated oil bath at 70 °C keeping a static H<sub>2</sub> atmosphere (ambient pressure, H<sub>2</sub> filled balloon). After stirring for 3 h at 70 °C, the mixture was allowed to cool to room temperature, the solvent was removed under reduced pressure and the crude product was purified by flash chromatography (silica, pentane/Et<sub>2</sub>O 100:1) to yield the title product as colorless oil (20.4 mg, 93%).

**Representative Procedure B. Preparation of Cycloalkene S104.** TBACl (0.021 M in 1,2-dichloroethane, 0.42 mL, 11 mol%) was added to solid [Cp(Me<sub>2</sub>CO<sub>2</sub>Et)Ru(NCMe)<sub>3</sub>][PF<sub>6</sub>] (**19**, 4.3 mg, 10 mol%) in a flame dried Schlenk tube under argon. The mixture was stirred for 5 min at room temperature before a solution of enyne **S77** (29.3 mg, 0.08 mmol) in 1,2-dichloroethane (0.5 mL, 0.1 M) was added. H<sub>2</sub> was bubbled through the mixture for 2 min before the flask was immersed into a pre-heated oil bath at 70 °C keeping a static H<sub>2</sub> atmosphere (ambient pressure, H<sub>2</sub> filled balloon). After stirring for 3 h at 70 °C, the mixture was allowed to cool to room temperature and the solvent was removed under reduced pressure. The crude product was purified by flash chromatography (silica, hexanes/EtOAc 40:1 – 20:1 – 10:1) to yield the title product as pale grey oil (16.9 mg, 65%).

**Representative Procedure C. Preparation of Cyclopropane S89.** [Cp\*RuCl]<sub>4</sub> (2.6 mg, 2 mol%) was added to a stirred solution of enyne **S60** (31.6 mg, 0.12 mmol) in CH<sub>2</sub>Cl<sub>2</sub> (1.2 mL, 0.1 M) in a flame dried Schlenk tube under argon. H<sub>2</sub> was bubbled through the mixture for 2 min and stirring was continued for 18h under H<sub>2</sub> atmosphere (ambient pressure, H<sub>2</sub> filled balloon). The solvent was removed under reduced pressure and the crude product was purified by flash chromatography (silica, hexanes/EtOAc 100:1) to yield the title product as colorless oil (29.1 mg, 91%).

**Representative Procedure D. Preparation of Cyclopropane 85.** [Cp\*RuCl]<sub>4</sub> (1.0 mg, 2 mol%) was added to a stirred solution of enyne **S56** (20.0 mg, 0.05 mmol) in 1,2-dichloroethane (1 mL, 0.5 M) in a flame dried thick-walled Schlenk tube under argon. H<sub>2</sub> was bubbled through the mixture for 2 min before the tube was sealed and immersed into a pre-heated oil bath at 90 °C keeping a static H<sub>2</sub> atmosphere. The mixture was stirred for 18 h at 90 °C before it was cooled to room temperature. The solvent was removed under reduced pressure and the crude product was purified by flash chromatography (silica, hexanes/EtOAc 97:3) to yield the title product as colorless solid (15.6 mg, 78%).



Selected experimental data on the influence of various reaction parameters is summarized below.

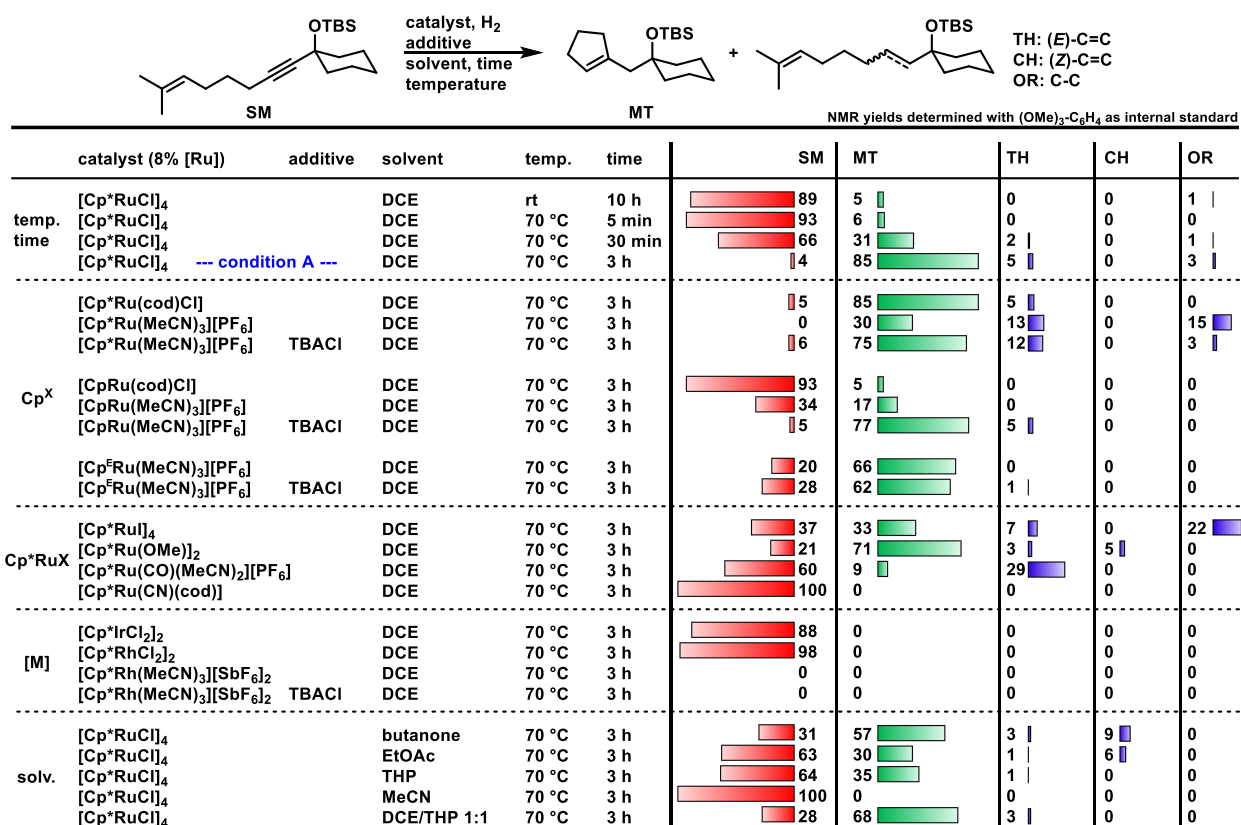

[in case of the dicationic [Cp\*Rh] catalysts, a complex mixture of unidentified products was formed]

Selected experimental data on the optimization of six membered ring formation is summarized below.

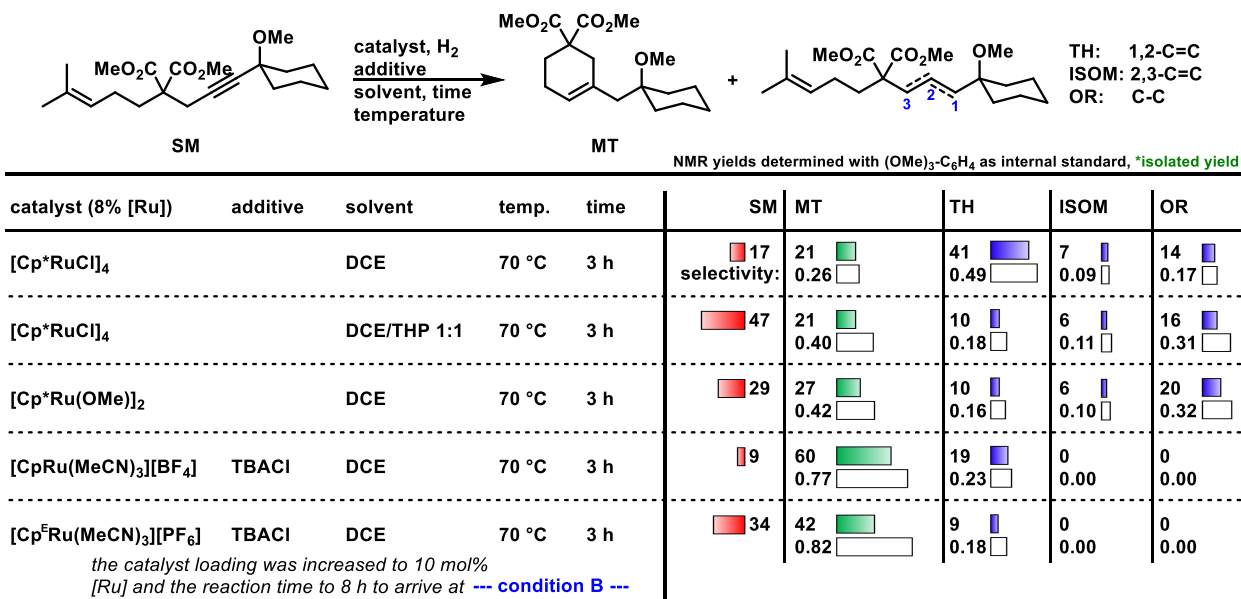

**1-(Cyclopent-1-en-1-ylmethyl)-1-methoxycyclohexane (2a).** According to the Representative Procedure

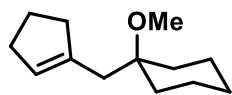

A from enyne **1a** (24.8 mg, 0.11 mmol), colorless oil (20.4 mg, 93%).  $^1\text{H}$  NMR (400 MHz,  $\text{CDCl}_3$ )  $\delta$  5.43 – 5.36 (m, 1H), 3.18 (s, 3H), 2.36 – 2.26 (m, 4H), 2.27 – 2.21 (m, 2H), 1.90 – 1.77 (m, 2H), 1.73 – 1.64 (m, 2H), 1.59 – 1.37 (m, 5H), 1.32 – 1.16 (m, 3H).  $^{13}\text{C}$  NMR (101 MHz,  $\text{CDCl}_3$ )  $\delta$  140.7, 127.6, 75.6, 48.3, 37.5, 36.9, 34.5, 32.6, 26.0, 23.9, 22.1. IR (film)  $\tilde{\nu}$  3038, 2929, 2848, 1455, 1444, 1081  $\text{cm}^{-1}$ . HRMS (ESI $^+$ ) for  $\text{C}_{13}\text{H}_{22}\text{O}$   $[\text{M}+\text{H}]^+$ : calcd: 195.1734, found: 195.1741.

**(1S\*,5R\*)-1-((1-Methoxycyclohexyl)methyl)bicyclo[3.1.0]hexane (3b).** According to the Representative

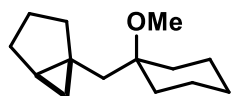

Procedure A from enyne **1b** (31.2 mg, 0.15 mmol); colorless oil (29.3 mg, 93%).  $^1\text{H}$  NMR (400 MHz,  $\text{CDCl}_3$ ):  $\delta$  3.15 (s, 3H), 1.92 – 1.72 (m, 4H), 1.71 – 1.47 (m, 7H), 1.47 – 1.35 (m, 2H), 1.36 – 1.24 (m, 3H), 1.24 – 1.06 (m, 2H), 0.86 (dt,  $J$  = 8.1, 4.1 Hz, 1H), 0.40 (t,  $J$  = 4.2 Hz, 1H), 0.31 (dd,  $J$  = 8.0, 5.0 Hz, 1H).  $^{13}\text{C}$  NMR (101 MHz,  $\text{CDCl}_3$ ):  $\delta$  77.4, 48.2, 42.6, 35.1, 34.5, 32.5, 27.1, 26.1, 25.0, 23.9, 22.1, 22.1, 13.5. IR (film)  $\tilde{\nu}$  2930, 2853, 1456, 1288, 1080 1026, 806  $\text{cm}^{-1}$ . HRMS (ESI $^+$ ) calcd for  $\text{C}_{14}\text{H}_{24}\text{O}$   $[\text{M}+\text{H}]^+$ : calcd: 209.1810; found: 209.1901.

**2-((1-Methoxycyclohexyl)methyl)cyclopent-2-en-1-one (5).** According to the Representative Procedure A

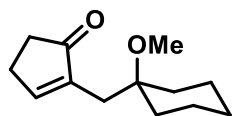

from enyne **4** (25.4 mg, 0.10 mmol); yellow oil (14.5 mg, 68%).  $^1\text{H}$  NMR (400 MHz,  $\text{CDCl}_3$ )  $\delta$  7.50 – 7.43 (m, 1H), 3.22 (s, 3H), 2.64 – 2.55 (m, 2H), 2.40 – 2.36 (m, 2H), 2.34 (q,  $J$  = 1.3 Hz, 2H), 1.71 – 1.60 (m, 2H), 1.58 – 1.49 (m, 1H), 1.49 – 1.41 (m, 4H), 1.32 – 1.16 (m, 3H).  $^{13}\text{C}$  NMR (101 MHz,  $\text{CDCl}_3$ )  $\delta$  210.2, 160.8, 141.9, 75.4, 48.5, 34.2, 34.0, 30.1, 26.9, 25.9, 21.9. IR (film)  $\tilde{\nu}$  2931, 2856, 1700, 1444, 1074  $\text{cm}^{-1}$ . HRMS (ESI $^+$ ) for  $\text{C}_{13}\text{H}_{20}\text{O}_2$   $[\text{M}+\text{Na}]^+$ : calcd: 231.1355, found: 231.1357.

**2-((1-Methoxycyclohexyl)methyl)-4,4-dimethylcyclopent-2-en-1-one (6).** According to General

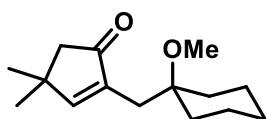

Procedure A from enyne **S75** (23.1 mg, 0.08 mmol); colorless oil (14.1 mg, 71%).  $^1\text{H}$  NMR (400 MHz,  $\text{CDCl}_3$ )  $\delta$  7.20 (t,  $J$  = 1.1 Hz, 1H), 3.19 (s, 3H), 2.28 (d,  $J$  = 1.1 Hz, 2H), 2.25 (s, 2H), 1.70 – 1.61 (m, 2H), 1.57 – 1.39 (m, 5H), 1.27 – 1.15 (m, 3H), 1.20 (s, 6H).  $^{13}\text{C}$  NMR (101 MHz,  $\text{CDCl}_3$ )  $\delta$  209.9, 170.2, 138.5, 75.3, 49.9, 48.4, 39.1, 34.1, 29.7, 28.5, 25.9, 21.9. IR (film)  $\tilde{\nu}$  2930, 2861, 1703, 1073  $\text{cm}^{-1}$ . HRMS (CI $^+$ ) for  $\text{C}_{15}\text{H}_{24}\text{O}_2$   $[\text{M}+\text{Na}]^+$ : calcd 237.1849, found 237.1849.

**3-((1-Methoxycyclohexyl)methyl)cyclopent-2-en-1-one (7).** According to General Procedure A from

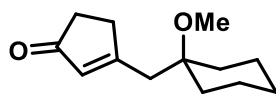

enyne **1m** (27.5 mg, 0.11 mmol); colorless oil (11.8 mg, 51%).  $^1\text{H}$  NMR (400 MHz,  $\text{CDCl}_3$ )  $\delta$  6.01 (tt,  $J$  = 1.9, 1.0 Hz, 1H), 3.21 (s, 3H), 2.71 – 2.65 (m, 2H), 2.56 (s, 2H), 2.40 – 2.36 (m, 2H), 1.79 – 1.68 (m, 2H), 1.61 – 1.49 (m, 3H), 1.49 – 1.39 (m, 2H), 1.34 – 1.22 (m, 3H).  $^{13}\text{C}$  NMR (101 MHz,  $\text{CDCl}_3$ )  $\delta$  210.3, 179.1, 132.9, 75.7, 48.5, 39.5, 35.6, 34.7, 33.3, 25.7, 22.0. IR (neat)  $\tilde{\nu}$  2930, 2856, 1702, 1674, 1610, 1072  $\text{cm}^{-1}$ . HRMS (ESI $^+$ ) for  $\text{C}_{13}\text{H}_{20}\text{O}_2$   $[\text{M}+\text{Na}]^+$ : calcd 231.1355, found 231.1357.

**3-((1-Methoxycyclohexyl)methyl)furan-2(5H)-one (8).** According to the Representative Procedure A from enyne **S76** (27.1 mg, 0.11 mmol); light yellow oil (11.9 mg, 52%). <sup>1</sup>H NMR (400 MHz, CDCl<sub>3</sub>) δ 7.29 (p, *J* = 1.6 Hz, 1H), 4.80 (q, *J* = 1.7 Hz, 2H), 3.22 (s, 3H), 2.46 (q, *J* = 1.6 Hz, 2H), 1.75 – 1.67 (m, 2H), 1.59 – 1.42 (m, 5H), 1.36 – 1.20 (m, 3H). <sup>13</sup>C NMR (101 MHz, CDCl<sub>3</sub>) δ 175.3, 147.4, 129.6, 75.3, 70.5, 48.6, 34.1, 30.8, 25.8, 21.8. IR (film)  $\tilde{\nu}$  2931, 2856, 1730, 1455, 1346, 1071 cm<sup>-1</sup>. HRMS (ESI<sup>+</sup>) for C<sub>12</sub>H<sub>18</sub>O<sub>3</sub> [M+H]<sup>+</sup>: calcd: 211.1329, found: 211.1329.

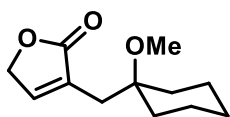

**1-Tosyl-3-((trimethylsilyl)methyl)-2,5-dihydro-1H-pyrrole (28a).** According to General Procedure A from enyne **27a** (36.1 mg, 0.10 mmol); colorless oil (26.3 mg, 82%). <sup>1</sup>H NMR (400 MHz, CDCl<sub>3</sub>) δ 7.75 – 7.66 (m, 2H), 7.35 – 7.28 (m, 2H), 5.03 (m, 1H), 4.08 (m, 2H), 3.93 (m, 2H), 2.42 (s, 3H), 1.43 (dd, *J* = 2.2, 0.9 Hz, 2H), -0.06 (s, 9H). <sup>13</sup>C NMR (101 MHz, CDCl<sub>3</sub>) δ 143.5, 136.9, 134.3, 129.8, 127.6, 115.9, 58.2, 55.5, 21.6, 19.1, -1.4. IR (film)  $\tilde{\nu}$  2950, 2846, 1330, 1248, 1157, 1103 cm<sup>-1</sup>. HRMS (EI<sup>+</sup>) for C<sub>15</sub>H<sub>23</sub>NO<sub>2</sub>SSi [M]<sup>+</sup>: calcd 309.1219, found 309.1218.

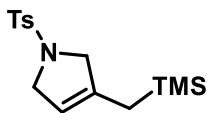

**1-Tosyl-5-((trimethylsilyl)methyl)-1,2,3,6-tetrahydropyridine (28b).** According to General Procedure B (with 20 mol% [Cp(Me<sub>2</sub>CO<sub>2</sub>Et)Ru(NCMe)<sub>3</sub>][PF<sub>6</sub>]<sub>2</sub> and 25 mol% TBACl (0.04 M), for 16 h) from enyne **27b** (37.4 mg, 0.10 mmol); colorless oil (19.6 mg, 59%). <sup>1</sup>H NMR (400 MHz, CDCl<sub>3</sub>) δ 7.69 – 7.65 (m, 2H), 7.33 – 7.29 (m, 2H), 5.24 (m, 1H), 3.38 (q, *J* = 2.4 Hz, 2H), 3.08 (t, *J* = 5.8 Hz, 2H), 2.43 (s, 3H), 2.17 (m, 2H), 1.36 (s, 2H), -0.03 (s, 9H). <sup>13</sup>C NMR (101 MHz, CDCl<sub>3</sub>) δ 143.5, 133.6, 131.8, 129.7, 127.8, 116.9, 48.9, 42.8, 25.4, 24.9, 21.7, -1.2. IR (film)  $\tilde{\nu}$  2953, 2845, 1341, 1247, 1162 cm<sup>-1</sup>. HRMS (EI<sup>+</sup>) for C<sub>16</sub>H<sub>25</sub>NO<sub>2</sub>SSi [M]<sup>+</sup>: calcd 323.1370, found 323.1366.

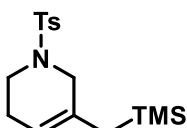

**(1R\*,5R\*)-1-Methyl-3-tosyl-5-((trimethylsilyl)methyl)-3-azabicyclo[3.1.0]hexane (30).** According to General Procedure A from known enyne **29** (18.0 mg, 0.54 mmol); colorless oil (13.0 mg, 72%). <sup>1</sup>H NMR (400 MHz, CDCl<sub>3</sub>) δ 7.69 – 7.65 (m, 2H), 7.35 – 7.30 (m, 2H), 3.54 (d, *J* = 8.9 Hz, 1H), 3.49 (d, *J* = 8.9 Hz, 1H), 2.78 – 2.71 (m, 2H), 2.44 (s, 3H), 1.01 (s, 3H), 0.70 (d, *J* = 4.9 Hz, 1H), 0.67 (dd, *J* = 14.8, 1.0 Hz, 1H), 0.38 (d, *J* = 14.9 Hz, 1H), 0.09 (dt, *J* = 5.0, 1.0 Hz, 1H), 0.00 (s, 9H). <sup>13</sup>C NMR (101 MHz, CDCl<sub>3</sub>) δ 143.5, 133.7, 129.7, 127.7, 55.3, 55.2, 28.1, 25.9, 21.7, 20.1, 17.3, 14.8, -0.5. IR (film)  $\tilde{\nu}$  2953, 2854, 1339, 1246, 1159 cm<sup>-1</sup>. HRMS (CI<sup>+</sup>) for C<sub>17</sub>H<sub>27</sub>NO<sub>2</sub>SSi [M+H]<sup>+</sup>: calcd 338.1605, found 338.1604.

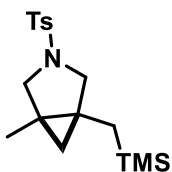

**1-Methyl-4-((trimethylsilyl)methyl)-1,5-dihydro-2H-pyrrol-2-one (32).** According to General Procedure A from enyne **31** (24.8 mg, 0.11 mmol); light yellow oil (14.5 mg, 71%). <sup>1</sup>H NMR (400 MHz, CDCl<sub>3</sub>) δ 5.67 (m, 1H), 3.78 (s, 2H), 2.97 (s, 3H), 1.86 (m, 2H), 0.06 (s, 9H). <sup>13</sup>C NMR (101 MHz, CDCl<sub>3</sub>) δ 172.9, 157.9, 119.9, 58.1, 29.0, 21.6, -1.5. IR (film)  $\tilde{\nu}$  2953, 2845, 1341, 1247, 1162 cm<sup>-1</sup>. HRMS (EI<sup>+</sup>) for C<sub>9</sub>H<sub>17</sub>NOSi [M]<sup>+</sup>: calcd 183.1074, found 183.1071.

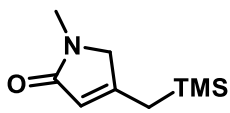

**4,4-Dimethyl-2-((trimethylsilyl)methyl)cyclopent-2-en-1-one (34).** According to General Procedure A from enyne **33** (25.0 mg, 0.11 mmol); colorless oil (13.0 mg, 63%). <sup>1</sup>H NMR (400 MHz, CDCl<sub>3</sub>) δ 6.85 (t, *J* = 1.1 Hz, 1H), 2.24 (s, 2H), 1.59 (d, *J* = 1.1 Hz, 2H), 1.19 (s, 6H), -0.02 (s, 9H). <sup>13</sup>C NMR (101 MHz, CDCl<sub>3</sub>) δ 209.6, 164.4, 140.8, 50.1, 38.6, 28.8, 14.0, -1.6. IR

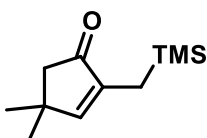

(film)  $\tilde{\nu}$  2955, 1703, 1247, 1160, 1039  $\text{cm}^{-1}$ . HRMS ( $\text{Cl}^+$ ) for  $\text{C}_{11}\text{H}_{20}\text{OSi}$  [ $\text{M}$ ] $^+$ : calcd 196.1278, found 196.1277.

**2-Neopentylcyclopent-2-en-1-one (36).** According to General Procedure A from enyne **35** (25.3 mg, 0.13 mmol); light yellow oil (12.8 mg, 64%).  $^1\text{H}$  NMR (400 MHz,  $\text{CDCl}_3$ )  $\delta$  7.34 (tt,  $J = 2.8$ , 0.9 Hz, 1H), 2.61 – 2.56 (m, 2H), 2.40 – 2.36 (m, 2H), 2.10 (q,  $J = 1.2$  Hz, 2H), 0.87 (s, 9H).  $^{13}\text{C}$  NMR (101 MHz,  $\text{CDCl}_3$ )  $\delta$  210.2, 160.1, 144.2, 37.7, 34.3, 31.5, 29.4, 26.5. IR (film)  $\tilde{\nu}$  2952, 2856, 1698, 1365  $\text{cm}^{-1}$ . HRMS ( $\text{Cl}^+$ ) for  $\text{C}_{10}\text{H}_{16}\text{O}$  [ $\text{M}+\text{H}$ ] $^+$ : calcd 153.1274, found 153.1273.

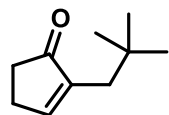

**3-((Trimethylsilyl)methyl)furan-2(5H)-one (38).** According to General Procedure A from enyne **37** (27.8 mg, 0.13 mmol); light brown oil (12.7 mg, 56%). On larger scale a slightly modified protocol was followed (see preparation of **39**).  $^1\text{H}$  NMR (400 MHz,  $\text{CDCl}_3$ )  $\delta$  6.88 (td,  $J = 1.9$ , 1.0 Hz, 1H), 4.74 (q,  $J = 1.7$  Hz, 2H), 1.78 (q,  $J = 1.5$  Hz, 2H), 0.05 (s, 9H).  $^{13}\text{C}$  NMR (101 MHz,  $\text{CDCl}_3$ )  $\delta$  175.0, 140.5, 132.2, 70.1, 15.6, -1.7. IR (film)  $\tilde{\nu}$  2955, 1745, 1249, 1159, 1064, 1037  $\text{cm}^{-1}$ . HRMS ( $\text{Cl}^+$ ) for  $\text{C}_8\text{H}_{14}\text{O}_2\text{Si}$  [ $\text{M}+\text{H}$ ] $^+$ : calcd 171.0836, found 171.0836.

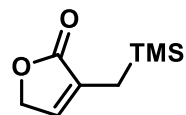

**Ethyl (1S\*,5R\*,6R\*)-1-((1-methoxycyclohexyl)methyl)bicyclo[3.1.0]hexane-6-carboxylate (3i).** According to General Procedure A from enyne **1i** (34.0 mg, 0.12 mmol); colorless oil (22.8 mg, 67%).  $^1\text{H}$  NMR (400 MHz,  $\text{CDCl}_3$ )  $\delta$  4.10 (q,  $J = 7.1$  Hz, 2H), 3.14 (s, 3H), 2.00 (ddd,  $J = 13.4$ , 8.4, 1.1 Hz, 1H), 1.95 – 1.85 (m, 1H), 1.89 (d,  $J = 7.0$  Hz, 2H), 1.83 – 1.67 (m, 5H), 1.65 – 1.33 (m, 7H), 1.25 (t,  $J = 7.1$  Hz, 3H), 1.22 – 1.05 (m, 4H).  $^{13}\text{C}$  NMR (101 MHz,  $\text{CDCl}_3$ )  $\delta$  173.4, 76.3, 60.3, 48.1, 36.9, 34.9, 33.8, 33.7, 33.5, 33.1, 27.2, 26.3, 26.0, 21.9, 21.8, 21.1, 14.5. IR (film)  $\tilde{\nu}$  2931, 2859, 1718, 1176, 1154, 1079  $\text{cm}^{-1}$ . HRMS ( $\text{ESI}^+$ ) for  $\text{C}_{17}\text{H}_{28}\text{O}_3$  [ $\text{M}+\text{H}$ ] $^+$ : calcd 281.2111, found 281.2110.

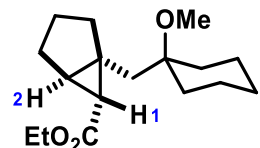

**Methyl (1S\*,5R\*,6S\*)-1-((1-methoxycyclohexyl)methyl)bicyclo[3.1.0]hexane-6-carboxylate (3j).** According to General Procedure A from enyne **1j** (32.1 mg, 0.12 mmol); colorless oil (29.6 mg, 92%).  $^1\text{H}$  NMR (400 MHz,  $\text{CDCl}_3$ )  $\delta$  3.66 (s, 3H), 3.14 (s, 3H), 2.10 (ddd,  $J = 13.1$ , 8.8, 1.9 Hz, 1H), 1.95 – 1.79 (m, 5H), 1.78 – 1.64 (m, 2H), 1.63 – 1.29 (m, 10H), 1.27 – 1.12 (m, 2H).  $^{13}\text{C}$  NMR (101 MHz,  $\text{CDCl}_3$ )  $\delta$  172.1, 76.4, 51.7, 48.1, 43.3, 34.7, 34.3, 33.7, 31.5, 31.3, 30.3, 26.0, 25.7, 24.6, 22.0, 22.0. IR (film)  $\tilde{\nu}$  2931, 2859, 1728, 1436, 1152, 1078  $\text{cm}^{-1}$ . HRMS ( $\text{ESI}^+$ ) for  $\text{C}_{16}\text{H}_{26}\text{O}_3$  [ $\text{M}+\text{Na}$ ] $^+$ : calcd 289.1774, found 289.1779.

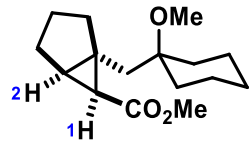

**(1S\*,5R\*,6R\*)-1-((1-Methoxycyclohexyl)methyl)bicyclo[3.1.0]hexane-6-carbaldehyde (3k).** According to General Procedure A from enyne **1k** (20.1 mg, 0.09 mmol); colorless oil (12.5 mg, 62%).  $^1\text{H}$  NMR (400 MHz,  $\text{CDCl}_3$ )  $\delta$  9.49 (d,  $J = 4.8$  Hz, 1H), 3.13 (s, 3H), 2.06 (dd,  $J = 13.4$ , 8.3 Hz, 1H), 1.99 (t,  $J = 3.6$  Hz, 1H), 1.97 – 1.70 (m, 8H), 1.69 – 1.37 (m, 6H), 1.27 – 1.06 (m, 4H).  $^{13}\text{C}$  NMR (101 MHz,  $\text{CDCl}_3$ )  $\delta$  201.5, 76.1, 48.1, 40.3, 36., 35.11, 35.0, 35.0, 34.0, 33.6, 27.2, 25.9, 21.9, 21.8, 21.0. IR (film)  $\tilde{\nu}$  2932, 2858, 1695, 1075  $\text{cm}^{-1}$ . HRMS ( $\text{ESI}^+$ ) for  $\text{C}_{15}\text{H}_{24}\text{O}_2$  [ $\text{M}+\text{Na}$ ] $^+$ : calcd 259.1668, found 259.1669.

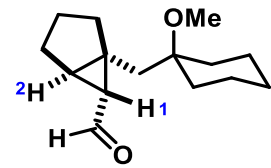

**1-((1S\*,5R\*,6R\*)-1-((1-Methoxycyclohexyl)methyl)bicyclo[3.1.0]hexan-6-yl)ethan-1-one (3I).** According to General Procedure A from enyne **1I** (27.3 mg, 0.11 mmol); colorless oil (22.7 mg, 82%). <sup>1</sup>H NMR (400 MHz, CDCl<sub>3</sub>) δ 3.12 (s, 3H), 2.22 (s, 3H), 2.02 (ddd, *J* = 13.5, 8.5, 1.1 Hz, 1H), 1.99 – 1.34 (m, 15H), 1.23 – 1.10 (m, 3H), 1.05 (ddd, *J* = 13.3, 11.7, 4.0 Hz, 1H). <sup>13</sup>C NMR (101 MHz, CDCl<sub>3</sub>) δ 207.6, 76.2, 48.1, 41.2, 36.1, 35.0, 33.8, 33.3, 32.9, 32.3, 27.4, 25.9, 21.8, 21.1. IR (film)  $\tilde{\nu}$  2931, 2858, 1688, 1361, 1185, 1077 cm<sup>-1</sup>. HRMS (ESI<sup>+</sup>) for C<sub>16</sub>H<sub>26</sub>O<sub>2</sub> [M+Na]<sup>+</sup>: calcd 273.1825, found 273.1821.

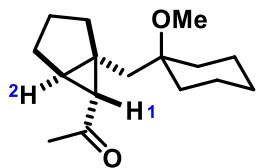

**1-(Cyclopent-1-en-1-ylmethyl)-1-(methoxymethoxy)cyclohexane (S81).** According to the Representative Procedure A from enyne **S52** (26.6 mg, 0.10 mmol), colorless oil (18.0 mg, 80%). <sup>1</sup>H NMR (400 MHz, CDCl<sub>3</sub>) δ 5.43 – 5.38 (m, 1H), 4.73 (s, 2H), 3.41 (s, 3H), 2.34 – 2.26 (m, 6H), 1.83 (m, 2H), 1.76 – 1.20 (m, 10H). <sup>13</sup>C NMR (101 MHz, CDCl<sub>3</sub>) δ 140.5, 128.1, 90.8, 77.8, 55.9, 39.5, 37.1, 35.5, 32.6, 25.9, 24.0, 22.5. IR (film)  $\tilde{\nu}$  2927, 2849, 1448, 1140, 1028 cm<sup>-1</sup>. HRMS (ESI<sup>+</sup>) for C<sub>14</sub>H<sub>24</sub>O<sub>2</sub> [M+Na]<sup>+</sup>: calcd: 247.1668, found: 247.1671.

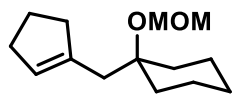

**tert-Butyl((1-(cyclopent-1-en-1-ylmethyl)cyclohexyl)oxy)dimethylsilane (S82).** According to the Representative Procedure A from enyne **S53** (31.4 mg, 0.09 mmol), colorless oil (19.0 mg, 69%). <sup>1</sup>H NMR (400 MHz, CDCl<sub>3</sub>) δ 5.40 (m, 1H), 2.34 – 2.25 (m, 6H), 1.83 (m, 2H), 1.70 – 1.57 (m, 2H), 1.53 – 1.24 (m, 8H), 0.88 (s, 9H), 0.08 (s, 6H). <sup>13</sup>C NMR (101 MHz, CDCl<sub>3</sub>) δ 141.4, 127.9, 75.9, 43.8, 38.2, 37.4, 32.6, 26.3, 25.9, 24.2, 23.0, 18.6, -1.4. IR (film)  $\tilde{\nu}$  2927, 2853, 1471, 1251, 1056, 769 cm<sup>-1</sup>. HRMS (ESI<sup>+</sup>) for C<sub>18</sub>H<sub>34</sub>OSi [M+Na]<sup>+</sup>: calcd: 317.2271, found: 317.2271.

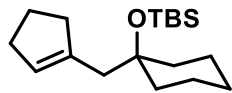

**3-(2-((tert-Butyldimethylsilyl)oxy)-2-methylpropyl)-1-tosyl-2,5-dihydro-1H-pyrrole (S83).** According to the Representative Procedure A from enyne **S54** (44.8 mg, 0.10 mmol); colorless solid (31.0 mg, 76%). <sup>1</sup>H NMR (400 MHz, CDCl<sub>3</sub>) δ 7.73 – 7.68 (m, 2H), 7.33 – 7.28 (m, 2H), 5.34 – 5.27 (m, 1H), 4.14 – 4.03 (m, 4H), 2.42 (s, 3H), 2.15 (s, 2H), 1.13 (s, 6H), 0.83 (s, 9H), 0.03 (s, 6H). <sup>13</sup>C NMR (101 MHz, CDCl<sub>3</sub>) δ 143.4, 137.1, 134.6, 129.8, 127.6, 121.7, 73.5, 57.7, 54.8, 45.0, 30.0, 26.0, 21.7, 18.1, -1.9. IR (film)  $\tilde{\nu}$  3039, 2928, 2856, 1337, 1161, 1102 cm<sup>-1</sup>. HRMS (ESI<sup>+</sup>) for C<sub>21</sub>H<sub>35</sub>NO<sub>3</sub>Si [M+Na]<sup>+</sup>: calcd: 432.1999, found: 432.2000.

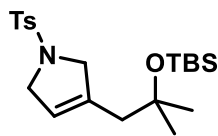

**3-(2-Methoxy-2-methylpropyl)-1-tosyl-2,5-dihydro-1H-pyrrole (S84).** According to the Representative Procedure A from enyne **S55** (34.8 mg, 0.1 mmol), colorless solid (24.0 mg, 78%). Single crystals suitable for X-ray analysis were grown by vapor diffusion of pentane into a saturated solution of product in CH<sub>2</sub>Cl<sub>2</sub> at room temperature. mp.: 76-77 °C. <sup>1</sup>H NMR (400 MHz, CDCl<sub>3</sub>) δ 7.74 – 7.68 (m, 2H), 7.33 – 7.28 (m, 2H), 5.33 – 5.29 (m, 1H), 4.14 – 4.05 (m, 4H), 3.14 (s, 3H), 2.42 (s, 3H), 2.17 (s, 2H), 1.04 (s, 6H). <sup>13</sup>C NMR (101 MHz, CDCl<sub>3</sub>) δ 143.4, 136.7, 134.5, 129.8, 127.6, 121.7, 74.5, 57.6, 54.9, 49.4, 40.2, 24.8, 21.7. IR (film)  $\tilde{\nu}$  2962, 2860, 2829, 1336, 1155, 1055 cm<sup>-1</sup>. HRMS (ESI<sup>+</sup>) for C<sub>16</sub>H<sub>23</sub>NO<sub>3</sub>S [M+Na]<sup>+</sup>: calcd: 332.1291, found: 332.1288.

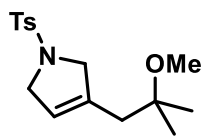

**(1R\*,5R\*)-1-(2-((*tert*-Butyldimethylsilyl)oxy)-2-methylpropyl)-3-tosyl-3-azabicyclo[3.1.0]hexane (S85).**

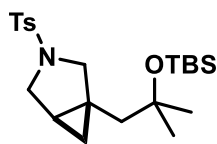

According to the Representative Procedure D from enyne **S56** (20.0 mg, 0.05 mmol); colorless solid (15.6 mg, 78%). Single crystals suitable for X-ray analysis were grown by slowly cooling a saturated solution of product in Et<sub>2</sub>O to -20 °C. m.p.: 104-105 °C. <sup>1</sup>H NMR (400 MHz, CDCl<sub>3</sub>) δ 7.66 (d, *J* = 8.3 Hz, 2H), 7.34 – 7.27 (m, 2H), 3.64 (d, *J* = 9.6 Hz, 1H), 3.47 (d, *J* = 9.0 Hz, 1H), 2.98 (dd, *J* = 9.0, 3.9 Hz, 1H), 2.91 (d, *J* = 9.9 Hz, 1H), 2.43 (s, 3H), 1.96 (d, *J* = 14.2 Hz, 1H), 1.26 (s, 3H), 1.18 (s, 3H), 1.09 – 0.97 (m, 2H), 0.89 (s, 9H), 0.74 (t, *J* = 4.9 Hz, 1H), 0.59 (dd, *J* = 7.9, 5.1 Hz, 1H), 0.10 (s, 3H), 0.09 (s, 3H). <sup>13</sup>C NMR (101 MHz, CDCl<sub>3</sub>) δ 143.3, 133.6, 129.6, 127.8, 74.9, 54.3, 49.6, 49.2, 31.4, 28.8, 26.2, 25.0, 21.7, 21.2, 18.2, 15.2, -1.7, -1.7. IR (film)  $\tilde{\nu}$  2928, 2855, 1462, 1347, 1163, 1132, 1027, 832, 771, 664, 567, 548 cm<sup>-1</sup>. HRMS (ESI<sup>+</sup>) for C<sub>22</sub>H<sub>37</sub>NO<sub>3</sub>Si [M+Na]<sup>+</sup>: calcd: 446.2156, found: 446.2155.

**((1-(2,5-Dihydrofuran-3-yl)-2-methylpropan-2-yl)oxy)triethylsilane (S86).** According to the

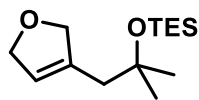

Representative Procedure A from enyne **S57** (27.0 mg, 0.09 mmol), colorless oil (22.2 mg, 95%). <sup>1</sup>H NMR (400 MHz, CDCl<sub>3</sub>): δ 5.54 – 5.50 (m, 1H), 4.67 – 4.57 (m, 4H), 2.29 (s, 2H), 1.23 (s, 6H), 0.94 (t, *J* = 7.9 Hz, 9H), 0.63 – 0.54 (m, 6H). <sup>13</sup>C NMR (101 MHz, CDCl<sub>3</sub>): δ 138.0, 122.6, 78.1, 75.5, 73.3, 43.7, 30.1, 7.2, 6.9. IR (film)  $\tilde{\nu}$  3412, 2973, 1735, 1370, 1234, 1072, 1010, 901, 736 cm<sup>-1</sup>. HRMS (ESI<sup>+</sup>) for C<sub>14</sub>H<sub>28</sub>O<sub>2</sub>Si [M+Na]<sup>+</sup>: calcd: 279.1751; found: 279.1753.

**((1-((1R\*,5R\*)-3-Oxabicyclo[3.1.0]hexan-1-yl)-2-methylpropan-2-yl)oxy)(*tert*-butyl)dimethylsilane (S87).** According to the Representative Procedure D from enyne **S58** (22.3 mg,

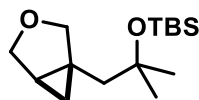

0.08 mmol), colorless oil (12.7 mg, 56%). <sup>1</sup>H NMR (400 MHz, CDCl<sub>3</sub>) δ 3.90 (d, *J* = 8.5 Hz, 1H), 3.76 – 3.64 (m, 2H), 3.62 (d, *J* = 8.5 Hz, 1H), 2.13 (d, *J* = 14.2 Hz, 1H), 1.32 (d, *J* = 14.3 Hz, 1H), 1.28 (s, 3H), 1.24 (s, 3H), 1.20 (d, *J* = 12.1 Hz, 1H), 1.13 (td, *J* = 6.0, 2.8 Hz, 1H), 0.86 (s, 9H), 0.63 (d, *J* = 6.4 Hz, 2H), 0.10 (s, 3H), 0.08 (s, 3H). <sup>13</sup>C NMR (101 MHz, CDCl<sub>3</sub>) δ 75.0, 74.1, 69.0, 48.8, 31.2, 29.2, 26.1, 25.9, 22.9, 18.2, 14.7, -1.7. IR (film)  $\tilde{\nu}$  2956, 2856, 1780, 1364, 1252, 1131, 1024, 830, 770, 690 cm<sup>-1</sup>. HRMS (ESI<sup>+</sup>) for C<sub>15</sub>H<sub>30</sub>O<sub>2</sub>Si [M+H]<sup>+</sup>: calcd: 271.2088, found: 271.2087.

**2-((1-(Cyclopent-1-en-1-yl)-2-methylpropan-2-yl)oxy)tetrahydro-2H-pyran (S88).** According to General

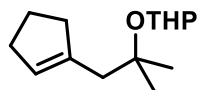

Procedure A from enyne **S59** (29.0 mg, 0.11 mmol); colorless oil (21.0 mg, 85%). <sup>1</sup>H NMR (400 MHz, CDCl<sub>3</sub>) δ 5.41 (m, 1H), 4.80 – 4.75 (m, 1H), 3.99 – 3.90 (m, 1H), 3.49 – 3.40 (m, 1H), 2.37 – 2.24 (m, 6H), 1.89 – 1.78 (m, 2H), 1.70 – 1.56 (m, 2H), 1.56 – 1.44 (m, 4H), 1.23 (s, 3H), 1.19 (s, 3H). <sup>13</sup>C NMR (101 MHz, CDCl<sub>3</sub>) δ 141.6, 127.9, 94.1, 76.7, 63.3, 44.0, 37.0, 32.6, 32.6, 27.5, 26.1, 25.7, 24.2, 20.9. IR (film)  $\tilde{\nu}$  2939, 2847, 1382, 1129, 1023, 991 cm<sup>-1</sup>. HRMS (APCI) for C<sub>14</sub>H<sub>24</sub>O<sub>2</sub> [M+H]<sup>+</sup>: calcd: 225.1849, found: 225.1848.

**((1-((1S\*,5R\*)-Bicyclo[3.1.0]hexan-1-yl)-2-methylpropan-2-yl)oxy)(*tert*-butyl)dimethylsilane (S89).**

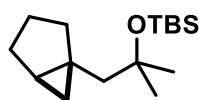

According to the Representative Procedure C from enyne **S60** (31.6 mg, 0.12 mmol); colorless oil (29.1 mg, 91%). <sup>1</sup>H NMR (400 MHz, CDCl<sub>3</sub>) δ 1.92 (dd, *J* = 14.1, 1.4 Hz, 1H), 1.81 (dd, *J* = 12.0, 7.8 Hz, 1H), 1.74 – 1.51 (m, 4H), 1.29 (d, *J* = 14.4 Hz, 1H), 1.27 (s, 3H), 1.24 (s, 3H), 1.18 (d, *J* = 8.3 Hz, 1H), 0.87 – 0.86 (m, 1H), 0.86 (s, 9H), 0.44 – 0.31 (m, 2H), 0.08 (s, 3H), 0.07 (s, 3H). <sup>13</sup>C NMR (101 MHz, CDCl<sub>3</sub>) δ 75.6, 52.2, 33.1, 30.9, 30.3, 27.0, 26.1, 26.0, 24.0, 22.3, 18.2, 13.6, -

1.7. IR (film)  $\tilde{\nu}$  2954, 2929, 2857, 1462, 1251, 1144, 1031, 832, 769, 689  $\text{cm}^{-1}$ . HRMS (CI) for  $\text{C}_{16}\text{H}_{32}\text{OSi}$   $[\text{M}+\text{H}]^+$ : calcd: 269.2295, found: 269.2295.

**(1S\*,5R\*)-1-(2-(Methoxymethoxy)-2-methylpropyl)bicyclo[3.1.0]hexane (S90)**. According to the

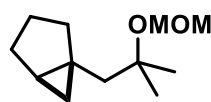

Representative Procedure C from enyne **S61** (34.3 mg, 0.17 mmol); colorless oil (27.4 mg, 79%).  $^1\text{H}$  NMR (400 MHz,  $\text{CDCl}_3$ )  $\delta$  4.71 (q,  $J = 7.2$  Hz, 2H), 3.36 (s, 3H), 2.00 (dd,  $J = 14.4, 1.5$  Hz, 1H), 1.86 – 1.78 (m, 1H), 1.73 – 1.48 (m, 5H), 1.35 (d,  $J = 14.4$  Hz, 1H), 1.29 (s, 3H), 1.26 (s, 3H), 1.22 – 1.08 (m, 1H), 0.87 (dt,  $J = 8.2, 4.1$  Hz, 1H), 0.45 – 0.40 (m, 1H), 0.39 – 0.32 (m, 1H).  $^{13}\text{C}$  NMR (101 MHz,  $\text{CDCl}_3$ )  $\delta$  91.1, 78.1, 55.2, 48.6, 33.0, 27.3, 27.0, 26.9, 25.6, 24.1, 22.3, 13.6. IR (film)  $\tilde{\nu}$  2928, 1715, 1449, 1259, 1087, 1030, 919, 806  $\text{cm}^{-1}$ . HRMS (ESI<sup>+</sup>) for  $\text{C}_{12}\text{H}_{22}\text{O}_2$   $[\text{M}+\text{Na}]^+$ : calcd: 221.1511, found: 221.1514.

**(2-(((1-((1S\*,5R\*)-Bicyclo[3.1.0]hexan-1-yl)-2-methylpropan-2-yl)oxy)methoxy)ethyl)trimethylsilane (S91)**. According to the Representative Procedure C from enyne **S62** (27.6 mg,

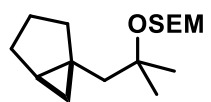

0.10 mmol); colorless oil (28.0 mg, quant.).  $^1\text{H}$  NMR (400 MHz,  $\text{CDCl}_3$ )  $\delta$  4.77 – 4.71 (m, 2H), 3.67 – 3.55 (m, 2H), 1.97 (d,  $J = 14.4$  Hz, 1H), 1.85 – 1.76 (m, 1H), 1.70 – 1.48 (m, 4H), 1.34 (d,  $J = 14.5$  Hz, 1H), 1.28 (s, 3H), 1.24 (s, 3H), 1.18 – 1.07 (m, 1H), 0.97 – 0.82 (m, 3H), 0.43 – 0.38 (m, 1H), 0.34 (dd,  $J = 7.9, 4.8$  Hz, 1H), -0.00 (s, 9H).  $^{13}\text{C}$  NMR (101 MHz,  $\text{CDCl}_3$ )  $\delta$  89.3, 77.9, 64.9, 48.6, 33.0, 27.3, 27.0, 25.7, 24.1, 22.3, 18.4, 13.6, -1.2. IR (film)  $\tilde{\nu}$  2955, 1259, 1091, 1023, 858, 833, 797, 692  $\text{cm}^{-1}$ . HRMS (ESI<sup>+</sup>) for  $\text{C}_{16}\text{H}_{32}\text{O}_2\text{Si}$   $[\text{M}+\text{Na}]^+$ : calcd: 307.2064, found: 307.2066.

**4-((1-Methoxycyclohexyl)methyl)-1-tosyl-1,2,3,6-tetrahydropyridine (S92)**. According to the

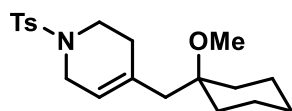

Representative Procedure B from enyne **S63** (33.7 mg, 0.08 mmol), colorless oil (17.9 mg, 59%).  $^1\text{H}$  NMR (400 MHz,  $\text{CDCl}_3$ )  $\delta$  7.68 – 7.64 (m, 2H), 7.33 – 7.28 (m, 2H), 5.36 – 5.28 (m, 1H), 3.60 – 3.52 (m, 2H), 3.14 (t,  $J = 5.7$  Hz, 2H), 3.13 (s, 3H), 2.42 (s, 3H), 2.28 – 2.22 (m, 2H), 2.07 (s, 2H), 1.68 – 1.31 (m, 6H), 1.31 – 1.11 (m, 3H), 0.96 – 0.81 (m, 1H).  $^{13}\text{C}$  NMR (101 MHz,  $\text{CDCl}_3$ )  $\delta$  143.5, 133.6, 133.5, 129.7, 127.9, 120.0, 75.7, 48.2, 45.0, 43.2, 42.7, 34.4, 29.9, 25.9, 22.0, 21.7. IR (film)  $\tilde{\nu}$  2929, 2854, 1458, 1341, 1161  $\text{cm}^{-1}$ . HRMS (ESI<sup>+</sup>) for  $\text{C}_{20}\text{H}_{29}\text{NO}_3\text{S}$   $[\text{M}+\text{Na}]^+$ : calcd: 386.1760, found: 386.1758.

**(1R\*,6R\*)-6-((1-Methoxycyclohexyl)methyl)-3-tosyl-3-azabicyclo[4.1.0]heptane (S93)**. According to the

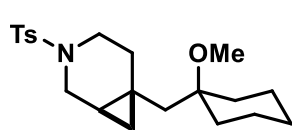

Representative Procedure A from enyne **S64** (35.0 mg, 0.09 mmol); colorless oil (27.2 mg, 77%).  $^1\text{H}$  NMR (400 MHz,  $\text{CDCl}_3$ )  $\delta$  7.63 – 7.59 (m, 2H), 7.31 – 7.28 (m, 2H), 3.31 (dt,  $J = 11.4, 1.4$  Hz, 1H), 3.22 (dd,  $J = 11.6, 5.4$  Hz, 1H), 3.08 (s, 3H), 2.91 – 2.84 (m, 1H), 2.71 (ddd,  $J = 12.0, 8.2, 5.3$  Hz, 1H), 2.42 (s, 3H), 2.12 (dt,  $J = 13.7, 5.8$  Hz, 1H), 1.92 (ddd,  $J = 13.8, 8.2, 5.3$  Hz, 1H), 1.81 – 1.67 (m, 2H), 1.60 – 1.33 (m, 6H), 1.28 – 1.08 (m, 4H), 0.82 (dtd,  $J = 8.8, 5.4, 1.9$  Hz, 1H), 0.51 (dd,  $J = 8.7, 4.9$  Hz, 1H), 0.42 (t,  $J = 5.2$  Hz, 1H).  $^{13}\text{C}$  NMR (101 MHz,  $\text{CDCl}_3$ )  $\delta$  143.4, 133.9, 129.7, 127.7, 76.7, 47.9, 45.0, 44.9, 42.9, 35.1, 34.9, 28.0, 26.0, 21.9, 21.8, 21.7, 17.8, 17.2, 15.1. IR (film)  $\tilde{\nu}$  2929, 2854, 1455, 1339, 1160, 1075  $\text{cm}^{-1}$ . HRMS (ESI<sup>+</sup>) for  $\text{C}_{21}\text{H}_{31}\text{NO}_3\text{S}$   $[\text{M}+\text{Na}]^+$ : calcd: 400.1917, found: 400.1917.

**3-(2,3-Bis((*tert*-Butyldimethylsilyl)oxy)-2-methylpropyl)-1-tosyl-2,5-dihydro-1*H*-pyrrole (S94).** According to the Representative Procedure A from enyne **S65** (55.0 mg, 0.09 mmol), colorless oil (34.2 mg, 67%). <sup>1</sup>H NMR (400 MHz, CDCl<sub>3</sub>) δ 7.74 – 7.68 (m, 2H), 7.33 – 7.28 (m, 2H), 5.32 (m, 1H), 4.11 – 4.01 (m, 4H), 3.26 – 3.20 (m, 2H), 2.42 (s, 3H), 2.27 – 2.21 (m, 1H), 2.20 – 2.11 (m, 1H), 1.10 (s, 3H), 0.86 (s, 9H), 0.83 (s, 9H), 0.03 (s, 3H), 0.03 (s, 3H), 0.00 (s, 3H), -0.02 (s, 3H). <sup>13</sup>C NMR (101 MHz, CDCl<sub>3</sub>) δ 143.3, 136.6, 134.5, 129.8, 127.7, 121.8, 76.2, 69.8, 57.9, 54.8, 39.6, 26.1, 26.0, 25.4, 21.7, 18.4, 18.3, -1.7, -1.8, -5.4, -5.4. IR (film)  $\tilde{\nu}$  2954, 2929, 2856, 1163, 1096 cm<sup>-1</sup>. HRMS (ESI<sup>+</sup>) for C<sub>27</sub>H<sub>49</sub>NO<sub>4</sub>Si<sub>2</sub> [M+Na]<sup>+</sup>: calcd: 562.2813, found: 562.2814.

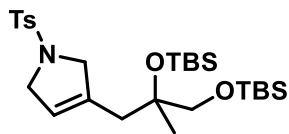

**3-((5-Methoxy-2,2-dimethyl-1,3-dioxan-5-yl)methyl)-1-tosyl-2,5-dihydro-1*H*-pyrrole (S95).** According to General Procedure A from enyne **S66** (39.4 mg, 0.09 mmol); colorless oil (24.6 mg, 69%). <sup>1</sup>H NMR (400 MHz, CDCl<sub>3</sub>) δ 7.73 – 7.67 (m, 2H), 7.34 – 7.29 (m, 2H), 5.45 – 5.40 (m, 1H), 4.08 (s, 4H), 3.65 (d, *J* = 11.9 Hz, 2H), 3.49 (d, *J* = 12.0 Hz, 2H), 3.25 (s, 3H), 2.42 (s, 3H), 2.34 (s, 2H), 1.39 (s, 3H), 1.34 (s, 3H). <sup>13</sup>C NMR (101 MHz, CDCl<sub>3</sub>) δ 143.6, 134.5, 134.3, 129.9, 127.6, 122.6, 98.8, 71.7, 65.2, 57.4, 54.9, 50.1, 30.8, 24.4, 23.0, 21.7. IR (neat)  $\tilde{\nu}$  2990, 2941, 2249, 1340, 1160, 1092 cm<sup>-1</sup>. HRMS (ESI<sup>+</sup>) for C<sub>19</sub>H<sub>27</sub>NO<sub>5</sub>S [M+Na]<sup>+</sup>: calcd 404.1502, found 404.1504.

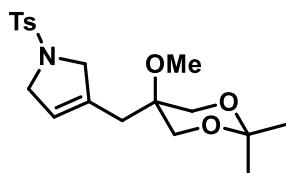

**3-((2-Methyl-1,3-dioxolan-2-yl)methyl)-1-tosyl-2,5-dihydro-1*H*-pyrrole (S96).** According to the Representative Procedure A from enyne **S67** (36.0 mg, 0.10 mmol); colorless oil (17.3 mg, 54%). <sup>1</sup>H NMR (400 MHz, CDCl<sub>3</sub>) δ 7.75 – 7.69 (m, 2H), 7.34 – 7.28 (m, 2H), 5.39 (m, 1H), 4.09 (s, 4H), 3.91 – 3.84 (m, 2H), 3.84 – 3.77 (m, 2H), 2.41 (s, 3H), 2.35 (s, 2H), 1.18 (s, 3H). <sup>13</sup>C NMR (101 MHz, CDCl<sub>3</sub>) δ 143.4, 135.2, 134.4, 129.8, 127.6, 122.4, 109.0, 64.8, 57.3, 55.1, 38.9, 23.9, 21.6. IR (film)  $\tilde{\nu}$  2983, 2875, 1341, 1161, 1046 cm<sup>-1</sup>. HRMS (ESI<sup>+</sup>) for C<sub>16</sub>H<sub>21</sub>NO<sub>4</sub>S [M+Na]<sup>+</sup>: calcd: 346.1084, found: 346.1083.

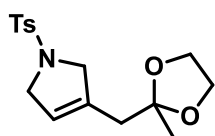

**1-Ttosyl-3-((2,2,4-trimethyl-1,3-dioxolan-4-yl)methyl)-2,5-dihydro-1*H*-pyrrole (S97).** According to General Procedure A from enyne **S68** (43.8 mg, 0.11 mmol); colorless oil (29.0 mg, 74%). <sup>1</sup>H NMR (400 MHz, CDCl<sub>3</sub>) δ 7.74 – 7.69 (m, 2H), 7.34 – 7.28 (m, 2H), 5.35 (m, 1H), 4.26 – 4.18 (m, 1H), 4.10 (m, 2H), 4.04 – 3.95 (m, 1H), 3.71 (d, *J* = 8.4 Hz, 1H), 3.68 (d, *J* = 8.4 Hz, 1H), 2.42 (s, 3H), 2.33 – 2.17 (m, 2H), 1.35 (d, *J* = 0.8 Hz, 3H), 1.30 (d, *J* = 0.8 Hz, 3H), 1.11 (s, 3H). <sup>13</sup>C NMR (101 MHz, CDCl<sub>3</sub>) δ 143.5, 136.1, 134.4, 129.8, 127.6, 122.4, 109.8, 80.2, 74.4, 57.6, 55.0, 39.6, 27.3, 27.2, 24.6, 21.7. IR (film)  $\tilde{\nu}$  2983, 2868, 1341, 1160, 1100, 1055 cm<sup>-1</sup>. HRMS (ESI<sup>+</sup>) for C<sub>18</sub>H<sub>25</sub>NO<sub>4</sub>S [M+H]<sup>+</sup>: calcd 352.1577, found 352.1581.

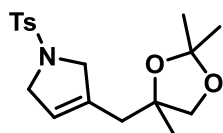

**3-(2-Methoxybutyl)-1-tosyl-2,5-dihydro-1*H*-pyrrole (S98).** According to the Representative Procedure A from enyne **S69** (41.8 mg, 0.12 mmol), pale brown oil (13.3 mg, 36%). <sup>1</sup>H NMR (400 MHz, CDCl<sub>3</sub>) δ 7.71 (d, *J* = 7.9 Hz, 2H), 7.31 (d, *J* = 7.9 Hz, 2H), 5.32 (s, 1H), 4.13 – 3.99 (m, 4H), 3.25 (s, 3H), 3.16 – 3.09 (m, 1H), 2.42 (s, 3H), 2.17 (d, *J* = 5.9 Hz, 2H), 1.48 – 1.31 (m, 2H), 0.83 (t, *J* = 7.4 Hz, 3H). <sup>13</sup>C NMR (101 MHz, CDCl<sub>3</sub>) δ 143.5, 137.0,

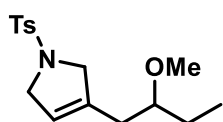



134.4, 129.8, 127.6, 120.3, 80.5, 57.1, 56.6, 55.1, 32.8, 25.8, 21.7, 9.3. IR (film)  $\tilde{\nu}$  2967, 2930, 1598, 1341, 1160  $\text{cm}^{-1}$ . HRMS (ESI<sup>+</sup>) for  $\text{C}_{16}\text{H}_{23}\text{NO}_3\text{S}$  [M+Na]<sup>+</sup>: calcd: 332.1291, found: 332.1291.

**3-(2-Methoxyethyl)-1-tosyl-2,5-dihydro-1H-pyrrole (S99).** According to the Representative Procedure A from enyne **S70** (34.8 mg, 0.11 mmol), colorless oil (3.5 mg, 11%). <sup>1</sup>H NMR (400 MHz,  $\text{CDCl}_3$ )  $\delta$  7.74 – 7.68 (m, 2H), 7.34 – 7.29 (m, 2H), 5.34 (hept,  $J = 1.6$  Hz, 1H), 4.13 – 4.05 (m, 2H), 4.06 – 4.01 (m, 2H), 3.42 (t,  $J = 6.3$  Hz, 2H), 3.30 (s, 3H), 2.43 (s, 3H), 2.31 – 2.23 (m, 2H). <sup>13</sup>C NMR (101 MHz,  $\text{CDCl}_3$ )  $\delta$  143.5, 137.0, 134.5, 129.9, 127.6, 119.6, 70.5, 58.8, 56.8, 55.1, 29.3, 21.7. IR (film)  $\tilde{\nu}$  2921, 2863, 1341, 1160, 1100  $\text{cm}^{-1}$ . HRMS (ESI<sup>+</sup>) for  $\text{C}_{14}\text{H}_{19}\text{NO}_3\text{S}$  [M+H]<sup>+</sup>: calcd: 282.1158, found: 282.1158.

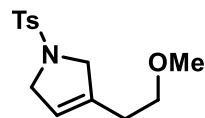

**1-Methoxy-1-((5-methoxycyclopent-1-en-1-yl)methyl)cyclohexane (S100).** According to the Representative Procedure A from enyne **S71** (30.5 mg, 0.12 mmol); colorless oil (13.7 mg, 53%). <sup>1</sup>H NMR (400 MHz,  $\text{CDCl}_3$ )  $\delta$  5.67 (m, 1H), 4.42 – 4.36 (m, 1H), 3.28 (s, 3H), 3.21 (s, 3H), 2.45 – 2.35 (m, 2H), 2.29 – 2.18 (m, 1H), 2.17 – 2.04 (m, 2H), 1.82 – 1.70 (m, 2H), 1.69 – 1.60 (m, 2H), 1.59 – 1.37 (m, 3H), 1.34 – 1.18 (m, 2H). <sup>13</sup>C NMR (101 MHz,  $\text{CDCl}_3$ )  $\delta$  140.0, 132.0, 87.9, 75.7, 55.6, 48.3, 35.0, 34.2, 33.5, 30.3, 28.9, 26.1, 22.1, 22.0. IR (film)  $\tilde{\nu}$  2931, 2853, 1456, 1260, 1083  $\text{cm}^{-1}$ . HRMS (ESI<sup>+</sup>) for  $\text{C}_{14}\text{H}_{24}\text{O}_2$  [M+Na]<sup>+</sup>: calcd: 247.1668, found: 247.1668.

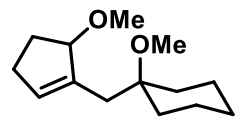

**3-((1-Methoxycyclohexyl)methyl)-2,5-dihydrofuran (S101).** According to the Representative Procedure A from enyne **S72** (25.9 mg, 0.11 mmol); pale yellow oil (16.9 mg, 79%). <sup>1</sup>H NMR (400 MHz,  $\text{CDCl}_3$ )  $\delta$  5.60 – 5.52 (m, 1H), 4.67 – 4.61 (m, 2H), 4.61 – 4.55 (m, 2H), 3.16 (s, 3H), 2.31 – 2.28 (m, 2H), 1.76 – 1.65 (m, 2H), 1.65 – 1.48 (m, 3H), 1.48 – 1.37 (m, 2H), 1.34 – 1.21 (m, 3H). <sup>13</sup>C NMR (101 MHz,  $\text{CDCl}_3$ )  $\delta$  136.4, 122.6, 77.9, 75.7, 75.2, 48.3, 34.3, 34.1, 25.9, 22.1. IR (film)  $\tilde{\nu}$  2932, 2855, 1750, 1145, 1073  $\text{cm}^{-1}$ . HRMS (ESI<sup>+</sup>) for  $\text{C}_{12}\text{H}_{20}\text{O}_2$  [M+Na]<sup>+</sup>: calcd: 219.1357, found: 219.1355.

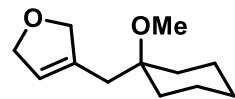

**Dimethyl 3-((1-methoxycyclohexyl)methyl)cyclopent-3-ene-1,1-dicarboxylate (S102).** According to the Representative Procedure A from enyne **S73** (24.6 mg, 0.07 mmol); colorless oil (16.8 mg, 77%). <sup>1</sup>H NMR (400 MHz,  $\text{CDCl}_3$ )  $\delta$  5.27 (m, 1H), 3.72 (s, 6H), 3.17 (s, 3H), 3.03 – 2.96 (m, 4H), 2.22 (q,  $J = 1.2$  Hz, 2H), 1.70 – 1.60 (m, 2H), 1.57 – 1.45 (m, 3H), 1.46 – 1.35 (m, 2H), 1.31 – 1.17 (m, 3H). <sup>13</sup>C NMR (101 MHz,  $\text{CDCl}_3$ )  $\delta$  172.9, 138.1, 124.2, 75.5, 59.6, 52.9, 48.3, 44.4, 40.6, 36.9, 3.3, 25.9, 22.1. IR (film)  $\tilde{\nu}$  2931, 2855, 1734, 1434, 1250  $\text{cm}^{-1}$ . HRMS (ESI<sup>+</sup>) for  $\text{C}_{17}\text{H}_{26}\text{O}_5$  [M+Na]<sup>+</sup>: calcd: 333.1672, found: 333.1673.

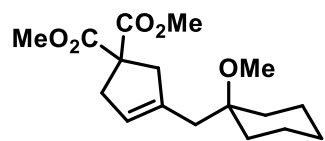

**4-Methoxy-4-methyl-1-octylcyclopent-1-ene (S103).** According to the Representative Procedure A from enyne **S74** (30.3 mg, 0.11 mmol), colorless oil (25.2 mg, 98%). <sup>1</sup>H NMR (400 MHz,  $\text{CDCl}_3$ )  $\delta$  5.23 (hept,  $J = 2.2$  Hz, 1H), 3.20 (s, 3H), 2.58 – 2.45 (m, 2H), 2.28 – 2.12 (m, 2H), 2.05 – 1.97 (m, 2H), 1.46 – 1.35 (m, 2H), 1.33 (s, 3H), 1.30 – 1.23 (m, 10H), 0.87 (t,  $J = 7.1$  Hz, 3H). <sup>13</sup>C NMR (101 MHz,  $\text{CDCl}_3$ )  $\delta$  142.9, 121.0, 83.9, 50.7, 47.0, 44.5, 32.0,

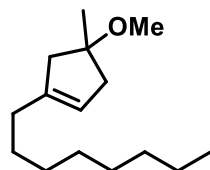

31.5, 29.6, 29.6, 29.4, 27.7, 25.6, 22.8, 14.3. IR (film)  $\tilde{\nu}$  2959, 2924, 2854, 1461, 1077  $\text{cm}^{-1}$ . HRMS (ESI<sup>+</sup>) for  $\text{C}_{15}\text{H}_{28}\text{O}$  [M+Na]<sup>+</sup>: calcd: 247.2032, found: 247.2032.

**Dimethyl 3-((1-methoxycyclohexyl)methyl)cyclohex-3-ene-1,1-dicarboxylate (S104).** According to the Representative Procedure B from enyne **S77** (29.3 mg, 0.08 mmol), colorless oil (16.9 mg, 65%). <sup>1</sup>H NMR (400 MHz,  $\text{CDCl}_3$ )  $\delta$  5.37 (m, 1H), 3.71 (s, 6H), 3.18 (s, 3H), 2.58 (s, 2H), 2.13 (s, 2H), 2.09 (s, 4H), 1.68 (dt,  $J = 13.4, 4.0$  Hz, 2H), 1.60 – 1.36 (m, 5H), 1.29 – 1.14 (m, 3H). <sup>13</sup>C NMR (101 MHz,  $\text{CDCl}_3$ )  $\delta$  172.3, 131.9, 123.8, 75.8, 53.9, 52.7, 48.3, 44.0, 35.4, 34.3, 27.3, 26.0, 22.8, 22.1. IR (film)  $\tilde{\nu}$  2931, 2852, 1733, 1435, 1253  $\text{cm}^{-1}$ . HRMS (ESI<sup>+</sup>) for  $\text{C}_{18}\text{H}_{28}\text{O}_5$  [M+Na]<sup>+</sup>: calcd: 347.1829, found: 347.1830.

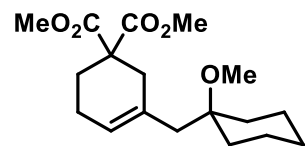

**5-Methoxy-5-methyl-1-octylcyclohex-1-ene (S105).** According to the Representative Procedure B from enyne **S78** (31.0 mg, 0.11 mmol), colorless oil (22.7 mg, 82%). <sup>1</sup>H NMR (400 MHz,  $\text{CDCl}_3$ )  $\delta$  5.40 – 5.32 (m, 1H), 3.24 (s, 3H), 2.20 – 2.05 (m, 2H), 2.04 – 1.88 (m, 4H), 1.73 – 1.65 (m, 1H), 1.57 – 1.48 (m, 1H), 1.38 (m, 2H), 1.26 (m, 10H), 1.16 (s, 3H), 0.91 – 0.85 (m, 3H). <sup>13</sup>C NMR (101 MHz,  $\text{CDCl}_3$ )  $\delta$  135.9, 119.4, 73.5, 49.0, 39.9, 37.9, 32.1, 31.9, 29.7, 29.5, 29.5, 27.8, 23.5, 22.8, 22.7, 14.3. IR (film)  $\tilde{\nu}$  2923, 2853, 1462, 1369, 1095  $\text{cm}^{-1}$ . HRMS (CI) for  $\text{C}_{16}\text{H}_{30}\text{O}$  [M+NH<sub>4</sub>]<sup>+</sup>: calcd: 256.2635, found: 256.2632.

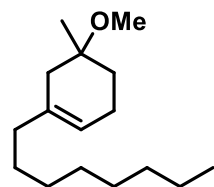

## TOTAL SYNTHESIS OF SINULARONE E AND F

**1-((2S\*,5S\*)-5-Methyltetrahydrofuran-2-yl)ethan-1-one (12).** A flame dried two-necked round-bottom flask was charged with Rh/Al<sub>2</sub>O<sub>3</sub> (5% Rh w/w, 300 mg, 0.15 mmol). The flask was evacuated and refilled with H<sub>2</sub> (by means of attaching a balloon filled with hydrogen via needle and septum). A solution of 2-acetyl-5-methylfuran **11** (2.00 g, 16.1 mmol) in Et<sub>2</sub>O (50 mL) was introduced and the mixture stirred at ambient temperature to the point of complete consumption of the starting material (typically 3 h, see below). The mixture was filtered through a pad of Celite and the solvent was evaporated. The residue was purified by flash chromatography (silica, pentane/Et<sub>2</sub>O 4:1 – 2:1) to yield the title compound as a colorless liquid (1.23 g, 59%). <sup>1</sup>H NMR (400 MHz,  $\text{CDCl}_3$ )  $\delta$  4.19 (dd,  $J = 8.6, 5.9$  Hz, 1H), 4.06 (dp,  $J = 8.1, 6.0$  Hz, 1H), 2.14 (s, 3H), 2.13 – 2.07 (m, 1H), 2.00 – 1.87 (m, 2H), 1.43 – 1.33 (m, 1H), 1.25 (d,  $J = 6.1$  Hz, 3H). <sup>13</sup>C NMR (101 MHz,  $\text{CDCl}_3$ )  $\delta$  210.9, 84.1, 77.3, 32.8, 29.4, 26.2, 21.1. IR (film)  $\tilde{\nu}$  2972, 1715, 1354, 1086  $\text{cm}^{-1}$ . HRMS (CI<sup>+</sup>) for  $\text{C}_7\text{H}_{12}\text{O}_2$  [M+H]<sup>+</sup>: calcd 129.0910, found 129.0909.

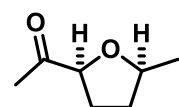

Care must be taken to thoroughly monitor the reaction progress. Otherwise the yield of the desired ketone is reduced by subsequent reduction to the alcohol. As soon as all UV active material (TLC) is consumed, the reaction mixture should be purged by an inert gas. Premature quenching leads to purification issues due to the copolarity of starting material and desired product. Selected experimental data is summarized below.

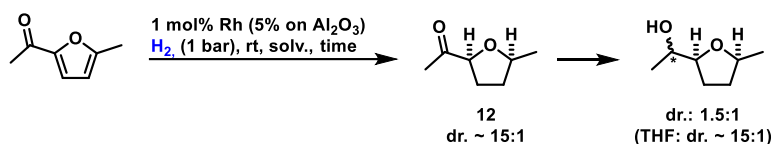

| SM [%] | solvent                   | time   | H <sub>4</sub> [%] | H <sub>6</sub> [%] | comment                                                                                                     |
|--------|---------------------------|--------|--------------------|--------------------|-------------------------------------------------------------------------------------------------------------|
| 25     | MeOH                      | 30 min | 30                 | 45                 | protic solvent favors over-reduction                                                                        |
| 0      |                           | 3 h    | 30                 | 70                 |                                                                                                             |
| 0      |                           | 4.5 h  | 25                 | 75                 |                                                                                                             |
| 0      |                           | 68 h   | 0                  | 100                |                                                                                                             |
| 70     | EtOAc                     | 30 min | 25                 | 5                  | aprotic solvents retard over-reduction                                                                      |
| 0      |                           | 3 h    | 75                 | 25                 |                                                                                                             |
| 0      |                           | 4.5 h  | 60                 | 40                 |                                                                                                             |
| 70     | Et <sub>2</sub> O         | 30 min | 25                 | 5                  | Et <sub>2</sub> O facilitates isolation (product volatility)<br>59 % ketone isolated                        |
| 0      |                           | 3 h    | 75                 | 25                 |                                                                                                             |
| 0      |                           | 4.5 h  | 70                 | 30                 |                                                                                                             |
| 50     | EtOAc<br>acetone<br>(4:1) | 30 min | 35                 | 10                 | sacrificial ketone does not improve selectivity<br>hydrogenation generates protic conditions <i>in-situ</i> |
| 0      |                           | 3 h    | 75                 | 25                 |                                                                                                             |
| 0      |                           | 4.5 h  | 65                 | 35                 |                                                                                                             |

\* GCMS TIC ratios

**(S\*)-2-((2S\*,5S\*)-5-Methyltetrahydrofuran-2-yl)but-3-yn-2-ol (14a)** and **(R\*)-2-((2S\*,5S\*)-5-Methyltetrahydrofuran-2-yl)but-3-yn-2-ol (14a')**. LaCl<sub>3</sub> · 2 LiCl (0.6 M in THF, 13.6 mL, 9.53 mmol) was added to a solution of ketone **12** (1.11 g, 8.66 mmol) in THF (14 mL) at room temperature. After stirring for 1 h, the mixture was cooled to 0 °C and ethynylmagnesium bromide (0.5 M in THF, 26.0 mL, 13.0 mmol) was slowly added. Stirring was continued for 1 h at the same temperature before sat. aq. NH<sub>4</sub>Cl solution (10 mL) was introduced. The layers were separated, the aqueous phase was extracted with EtOAc (3 x 60 mL) and the combined organic layers were washed with brine and dried over MgSO<sub>4</sub>. The solvent was evaporated and the residue purified by flash chromatography (silica, hexanes/EtOAc 4:1 – 3:1) to yield the two title compounds.

The minor diastereomer (**14a'**) was obtained as a colorless oil (176 mg, 12%). Single crystals suitable for X-ray analysis were obtained by sublimation (10<sup>-3</sup> mbar, 40 °C). <sup>1</sup>H NMR (400 MHz, CDCl<sub>3</sub>) δ 4.12 – 4.02 (m, 1H), 3.85 – 3.80 (m, 1H), 2.38 (s, 1H), 2.03 – 1.93 (m, 3H), 1.66 – 1.56 (m, 1H), 1.44 (s, 3H), 1.27 (d, *J* = 6.1 Hz, 3H). <sup>13</sup>C NMR (101 MHz, CDCl<sub>3</sub>) δ 85.7, 85.4, 76.6, 72.1, 70.4, 33.3, 27.7, 26.4, 21.1. IR (film)  $\tilde{\nu}$  3429 (br), 3290 (br), 2973, 2873, 2109, 1376, 1088 cm<sup>-1</sup>. HRMS (ESI<sup>+</sup>) for C<sub>9</sub>H<sub>14</sub>O<sub>2</sub> [M+Na]<sup>+</sup>: calcd 177.0886, found 177.0888.

The major diastereomer (**14a**) was obtained as a colorless oil (695 mg, 54%). Single crystals suitable for X-ray analysis were obtained by slow cooling of the neat material to –20 °C. <sup>1</sup>H NMR (400 MHz, CDCl<sub>3</sub>) δ 4.14 (dq, *J* = 12.4, 6.2 Hz, 1H), 3.94 (t, *J* = 7.3 Hz, 1H), 2.55 (br, 1H), 2.44 (s, 1H), 2.07 – 1.95 (m, 1H), 1.95 – 1.83 (m, 2H), 1.55 – 1.47 (m, 1H), 1.44 (s, 3H), 1.26 (d, *J* = 6.1 Hz, 3H). <sup>13</sup>C NMR (101 MHz, CDCl<sub>3</sub>) δ 87.1, 85.3, 76.4, 71.3, 68.4, 33.0, 25.8, 25.1, 21.4. IR (film)  $\tilde{\nu}$  3407 (br), 3295 (br), 2973, 2872, 2109, 1446, 1379, 1087 cm<sup>-1</sup>. HRMS (CI<sup>+</sup>) for C<sub>9</sub>H<sub>14</sub>O<sub>2</sub> [M+H]<sup>+</sup>: calcd 155.1067, found 155.1066.

**Trimethyl(2-(((S\*)-2-((2S\*,5S\*)-5-methyltetrahydrofuran-2-yl)but-3-yn-2-yl)oxy)methoxy)ethyl)silane**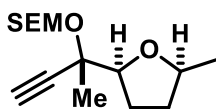

(**14b**). SEMCl (0.41 mL, 2.33 mmol) was added to a solution of alcohol **14a** (120 mg, 0.78 mmol) and *i*Pr<sub>2</sub>NEt (0.68 mL, 3.89 mmol) in CH<sub>2</sub>Cl<sub>2</sub> (3.0 mL) at 0 °C. The mixture was allowed to reach room temperature and stirring was continued for 16 h before

sat. NH<sub>4</sub>Cl solution was introduced. The layers were separated and the aqueous layer extracted with methyl *tert*-butyl ether (3 x 20 mL). The combined organic layers were washed with brine and dried over MgSO<sub>4</sub>. The solvent was evaporated and the residue purified by flash chromatography (silica, hexanes/EtOAc 1:0 – 20:1) to yield the title compound as a colorless oil (207 mg, 94%). <sup>1</sup>H NMR (400 MHz, CDCl<sub>3</sub>) δ 5.10 (d, *J* = 7.0 Hz, 1H), 4.87 (d, *J* = 7.1 Hz, 1H), 4.08 – 3.98 (m, 1H), 3.92 (dd, *J* = 7.3, 6.4 Hz, 1H), 3.72 (td, *J* = 9.7, 7.0 Hz, 1H), 3.60 (td, *J* = 9.7, 7.0 Hz, 1H), 2.48 (s, 1H), 2.07 – 1.87 (m, 3H), 1.56 – 1.47 (m, 1H), 1.52 (s, 3H), 1.26 (d, *J* = 6.0 Hz, 3H), 0.97 – 0.90 (m, 2H), 0.01 (s, 9H). <sup>13</sup>C NMR (101 MHz, CDCl<sub>3</sub>) δ 91.5, 84.6, 83.5, 76.6, 76.0, 74.8, 65.5, 33.0, 27.8, 24.5, 21.0, 18.3, -1.3. IR (film)  $\tilde{\nu}$  3310, 2954, 2879, 1248, 1096, 1020 cm<sup>-1</sup>. HRMS (ESI<sup>+</sup>) for C<sub>15</sub>H<sub>28</sub>O<sub>3</sub>Si [M+Na]<sup>+</sup>: calcd 307.1700, found 307.1701.

***tert*-Butyldimethyl(((S\*)-2-((2S\*,5S\*)-5-methyltetrahydrofuran-2-yl)but-3-yn-2-yl)oxy)silane (**14c**)**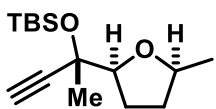

lutidine (0.19 mL, 1.62 mmol) was added to a solution of alcohol **14a** (125 mg, 0.81 mmol) in CH<sub>2</sub>Cl<sub>2</sub> (3.1 mL). The mixture was cooled to 0 °C before TBSOTf (0.22 mL, 0.97 mmol) was slowly added. After stirring for 2 h at room temperature, sat. aq.

NH<sub>4</sub>Cl solution (1 mL) and water (1 mL) were added and the layers separated. The aqueous phase was extracted with methyl *tert*-butyl ether (3 x 10 mL) and the combined organic layers were washed with brine and dried over MgSO<sub>4</sub>. The solvent was evaporated and the residue purified by flash chromatography (silica, hexanes/EtOAc 1:0 – 20:1) to give the title compound as a colorless oil (211 mg, 97%). <sup>1</sup>H NMR (400 MHz, CDCl<sub>3</sub>) δ 4.08 – 3.97 (m, 1H), 3.70 (dd, *J* = 7.4, 6.2 Hz, 1H), 2.39 (s, 1H), 2.11 – 2.00 (m, 1H), 1.97 – 1.85 (m, 2H), 1.60 – 1.52 (m, 1H), 1.48 (s, 3H), 1.25 (d, *J* = 6.0 Hz, 3H), 0.86 (s, 9H), 0.19 (s, 3H), 0.18 (s, 3H). <sup>13</sup>C NMR (101 MHz, CDCl<sub>3</sub>) δ 86.7, 86.3, 76.6, 73.0, 71.5, 33.0, 28.9, 27.4, 25.9, 21.3, 18.2, -2.6, -3.0. IR (film)  $\tilde{\nu}$  3311, 2930, 2857, 1251, 1121, 1094 cm<sup>-1</sup>. HRMS (CI<sup>+</sup>) for C<sub>15</sub>H<sub>28</sub>O<sub>2</sub>Si [M+H]<sup>+</sup>: calcd 269.1931, found 269.1929.

**Trimethyl(((S\*)-2-((2S\*,5S\*)-5-methyltetrahydrofuran-2-yl)but-3-yn-2-yl)oxy)silane (**14d**)**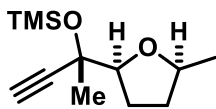

(1.00 mL, 8.82 mmol) was added to a solution of alcohol **14a** (680 mg, 4.41 mmol) in CH<sub>2</sub>Cl<sub>2</sub> (17.0 mL). The mixture was cooled to 0 °C before TMSOTf (0.96 mL, 5.29 mmol) was slowly added. After 5 min, sat. aq. NH<sub>4</sub>Cl solution (2 mL) and water (2 mL) were

added and the layers separated. The aqueous phase was extracted with methyl *tert*-butyl ether (3 x 50 mL) and the combined organic layers were washed with brine and dried over MgSO<sub>4</sub>. The solvent was evaporated and the residue purified by flash chromatography (silica, hexanes/methyl *tert*-butyl ether 1:0 – 10:1) to give the title compound as a pale yellow oil (923 mg, 92%). <sup>1</sup>H NMR (400 MHz, CDCl<sub>3</sub>) δ 4.05 (m, 1H), 3.75 (dd, *J* = 7.3, 6.2 Hz, 1H), 2.42 (s, 1H), 2.09 – 1.97 (m, 1H), 1.97 – 1.85 (m, 2H), 1.62 – 1.53 (m, 1H), 1.48 (s, 3H), 1.24 (d, *J* = 6.1 Hz, 3H), 0.20 (s, 9H). <sup>13</sup>C NMR (101 MHz, CDCl<sub>3</sub>) δ 86.7, 86.2, 76.6, 73.3, 71.7, 33.1, 28.5, 27.5, 21.3, 2.1. IR (film)  $\tilde{\nu}$  3310, 2970, 2871, 1249, 1094 cm<sup>-1</sup>. HRMS (CI<sup>+</sup>) for C<sub>12</sub>H<sub>22</sub>O<sub>2</sub>Si [M]<sup>+</sup>: calcd 226.1384, found 226.1381.

**N-Methoxy-N,3,3,5-tetramethylhex-4-enamide (18).** A solution of *i*-PrMgBr (2 M in THF, 5.56 mL, 11.1 mmol) was added to a stirred solution of ester **57** (410 mg, 2.22 mmol) and *N,O*-dimethylhydroxylamine hydrochloride (650 mg, 6.67 mmol) in THF (7.2 mL) at  $-20\text{ }^{\circ}\text{C}$ . After 30 min, sat. aq.  $\text{NH}_4\text{Cl}$  solution (2 mL) was added and the mixture

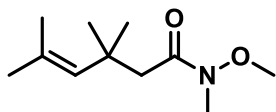

allowed to reach room temperature. After extraction with EtOAc (3 x 30 mL), the combined organic layers were washed with brine and dried over  $\text{MgSO}_4$ . The solvent was evaporated and the residue purified by flash chromatography (silica, hexanes/EtOAc 10:1 – 4:1) to give the title compound as a colorless oil (420 mg, 95%).  $^1\text{H}$  NMR (400 MHz,  $\text{CDCl}_3$ )  $\delta$  5.25 (hept,  $J = 1.4$  Hz, 1H), 3.66 (s, 3H), 3.16 (s, 3H), 2.51 (s, 2H), 1.72 (d,  $J = 1.3$  Hz, 3H), 1.68 (d,  $J = 1.4$  Hz, 3H), 1.24 (s, 6H).  $^{13}\text{C}$  NMR (101 MHz,  $\text{CDCl}_3$ )  $\delta$  173.5 (br), 133.6, 130.9, 61.1, 43.6 (br), 35.3, 32.0 (br), 29.3, 28.3, 19.1. IR (film)  $\tilde{\nu}$  2962, 2931, 1660, 1444, 1372, 1005  $\text{cm}^{-1}$ . HRMS (ESI<sup>+</sup>) for  $\text{C}_{11}\text{H}_{21}\text{NO}_2$  [ $\text{M}+\text{Na}$ ]<sup>+</sup>: calcd 222.1464, found 222.1463.

**(S<sup>\*</sup>)-7,7,9-Trimethyl-2-((2S<sup>\*</sup>,5S<sup>\*</sup>)-5-methyltetrahydrofuran-2-yl)-2-((2-(trimethylsilyl)ethoxy)methoxy)-dec-8-en-3-yn-5-one (15b).** *n*-BuLi (1.65 M in hexanes, 0.36 mL, 0.60 mmol) was added dropwise to a

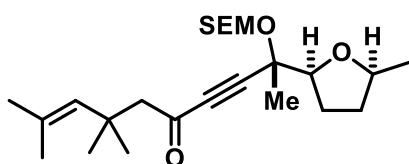

stirred solution of alkyne **14b** (154 mg, 0.54 mmol) in THF (2.2 mL) at  $-50\text{ }^{\circ}\text{C}$  and the resulting mixture was stirred for 30 min at that temperature. A solution of amide **18** (130 mg, 0.65 mmol) in THF (0.4 mL) was added and the mixture was allowed to reach room temperature. After stirring for 2 h., sat. aq.  $\text{NH}_4\text{Cl}$  solution (1 mL) and EtOAc (5 mL) were added and the layers separated. The aqueous phase was extracted with EtOAc (3 x 10 mL) and the combined organic layers were washed with brine and dried over  $\text{MgSO}_4$ . The solvent was evaporated and the residue was purified by flash chromatography (silica, hexanes/EtOAc 1:0 – 20:1) to give the title compound as a colorless oil (120 mg, 52%).  $^1\text{H}$  NMR (400 MHz,  $\text{CDCl}_3$ )  $\delta$  5.21 (hept,  $J = 1.4$  Hz, 1H), 5.04 (d,  $J = 7.2$  Hz, 1H), 4.84 (d,  $J = 7.2$  Hz, 1H), 4.09 – 3.96 (m, 1H), 3.92 (dd,  $J = 7.5, 6.1$  Hz, 1H), 3.71 (td,  $J = 9.7, 6.8$  Hz, 1H), 3.59 (td,  $J = 9.7, 6.8$  Hz, 1H), 2.69 (d,  $J = 14.1$  Hz, 1H), 2.65 (d,  $J = 14.1$  Hz, 1H), 2.06 – 1.89 (m, 3H), 1.72 (d,  $J = 1.4$  Hz, 3H), 1.68 (d,  $J = 1.4$  Hz, 3H), 1.56 (s, 3H), 1.54 – 1.46 (m, 1H), 1.26 (d,  $J = 6.0$  Hz, 3H), 1.23 (s, 6H), 0.93 (ddd,  $J = 10.7, 6.5, 3.5$  Hz, 2H), 0.01 (s, 9H).  $^{13}\text{C}$  NMR (101 MHz,  $\text{CDCl}_3$ )  $\delta$  186.6, 132.3, 132.0, 91.7, 90.9, 86.8, 84.2, 76.7, 76.2, 65.7, 57.8, 35.6, 33.0, 29.4, 29.4, 28.2, 28.0, 23.9, 21.0, 19.2, 18.3,  $-1.3$ . IR (film)  $\tilde{\nu}$  2956, 2879, 2213, 1668, 1248, 1095, 1014  $\text{cm}^{-1}$ . HRMS (ESI<sup>+</sup>) for  $\text{C}_{24}\text{H}_{42}\text{O}_4\text{Si}$  [ $\text{M}+\text{Na}$ ]<sup>+</sup>: calcd 445.2745, found 445.2745.

**(S<sup>\*</sup>)-2-((*tert*-Butyldimethylsilyl)oxy)-7,7,9-trimethyl-2-((2S<sup>\*</sup>,5S<sup>\*</sup>)-5-methyltetrahydrofuran-2-yl)dec-8-en-3-yn-5-one (15c).** *n*-BuLi (1.6 M in hexanes, 0.24 mL, 0.32 mmol) was added dropwise to a stirred

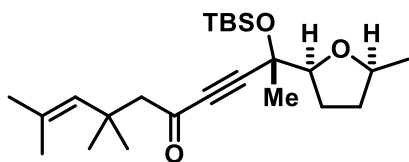

solution of alkyne **14c** (85 mg, 0.32 mmol) in THF (1.3 mL) at  $0\text{ }^{\circ}\text{C}$  and the resulting mixture was stirred for 15 min at that temperature. The mixture was then cooled to  $-78\text{ }^{\circ}\text{C}$  before a solution of amide **18** (75 mg, 0.38 mmol) in THF (0.3 mL) was added. The mixture was allowed to reach  $0\text{ }^{\circ}\text{C}$  and stirring was continued for 2 h at that temperature. Sat.  $\text{NH}_4\text{Cl}$  solution (1 mL) and EtOAc (3 mL) were added and the layers were separated. The aqueous phase was extracted with EtOAc (3 x 10 mL) and the combined organic layers were washed with brine and dried over  $\text{MgSO}_4$ . The solvent was evaporated the residue was purified by flash chromatography (silica, hexanes/EtOAc 1:0 – 40:1) to give the title compound as a colorless oil (78 mg, 61%).  $^1\text{H}$  NMR

(400 MHz, CDCl<sub>3</sub>) δ 5.22 (hept, *J* = 1.4 Hz, 1H), 4.02 (m, 1H), 3.73 (dd, *J* = 7.3, 6.0 Hz, 1H), 2.69 (d, *J* = 14.3 Hz, 1H), 2.64 (d, *J* = 14.3 Hz, 1H), 2.10 – 1.87 (m, 3H), 1.72 (d, *J* = 1.3 Hz, 3H), 1.68 (d, *J* = 1.4 Hz, 3H), 1.53 (s, 3H), 1.25 (d, *J* = 5.9 Hz, 3H), 1.24 (s, 6H), 0.86 (s, 9H), 0.21 (s, 3H), 0.18 (s, 3H). <sup>13</sup>C NMR (101 MHz, CDCl<sub>3</sub>) δ 186.6, 132.5, 131.8, 93.7, 86.1, 85.5, 76.7, 72.2, 57.5, 35.6, 33.0, 29.4, 29.4, 28.3, 28.2, 27.8, 25.8, 21.2, 19.2, 18.2, -2.6, -2.9. IR (film)  $\tilde{\nu}$  2957, 2930, 2858, 2210, 1667, 1250, 1094 cm<sup>-1</sup>. HRMS (ESI<sup>+</sup>) for C<sub>24</sub>H<sub>42</sub>O<sub>3</sub>Si [M+Na]<sup>+</sup>: calcd 429.2795, found 429.2796.

**(S\*)-7,7,9-Trimethyl-2-((2S\*,5S\*)-5-methyltetrahydrofuran-2-yl)-2-((trimethylsilyl)oxy)dec-8-en-3-yn-5-one (15d).**

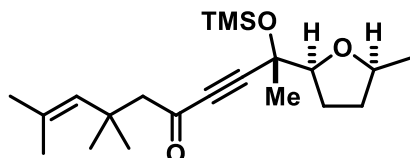

*n*-BuLi (1.6 M in hexanes, 0.47 mL, 0.75 mmol) was added dropwise to a stirred solution of alkyne **14d** (185 mg, 0.82 mmol) in THF (2.5 ml) at 0 °C and the resulting mixture was stirred for 20 min at that temperature. The mixture was then cooled to -78 °C before a solution of amide **18** (125 mg, 0.63 mmol) in THF (0.6 mL) was added.

The mixture was allowed to reach 0 °C and stirring was continued for 2 h at that temperature. Sat. NH<sub>4</sub>Cl solution (1 mL) and EtOAc (3 mL) were added and the layers separated. The aqueous phase was extracted with EtOAc (3 x 10 mL) and the combined organic layers were washed with brine and dried over MgSO<sub>4</sub>. The solvent was evaporated and excess alkyne removed by bulb-to-bulb distillation (10<sup>-3</sup> mbar, 50 °C, 1 h). The residue was purified by flash chromatography (silica, hexanes/EtOAc 1:0 – 40:1 – 20:1) to give the title compound as a colorless oil (149 mg, 65%). <sup>1</sup>H NMR (400 MHz, CDCl<sub>3</sub>) δ 5.22 (hept, *J* = 1.4 Hz, 1H), 4.09 – 3.99 (m, 1H), 3.77 (dd, *J* = 7.2, 6.1 Hz, 1H), 2.69 (d, *J* = 14.3 Hz, 1H), 2.64 (d, *J* = 14.3 Hz, 1H), 2.08 – 1.85 (m, 3H), 1.72 (d, *J* = 1.3 Hz, 3H), 1.68 (d, *J* = 1.4 Hz, 3H), 1.54 (m, 1H), 1.52 (s, 3H), 1.25 (d, *J* = 6.7 Hz, 3H) 1.24 (s, 6H), 0.20 (s, 9H). <sup>13</sup>C NMR (101 MHz, CDCl<sub>3</sub>) δ 186.6, 132.4, 131.8, 93.6, 85.9, 85.6, 76.8, 72.2, 57.5, 35.6, 33.0, 29.5, 29.4, 28.2, 27.9, 27.8, 21.2, 19.2, 2.0. IR (film)  $\tilde{\nu}$  2967, 2871, 2210, 1666, 1250, 1093 cm<sup>-1</sup>. HRMS (ESI<sup>+</sup>) for C<sub>21</sub>H<sub>36</sub>O<sub>3</sub>Si [M+Na]<sup>+</sup>: calcd 387.2326, found 387.2330.

**4,4-Dimethyl-2-((S\*)-2-((2S\*,5S\*)-5-methyltetrahydrofuran-2-yl)-2-((trimethylsilyl)oxy)propyl)cyclopent-2-en-1-one (S79).**

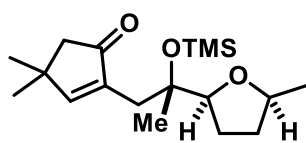

TBACl (0.04 M in 1,2-dichloroethane, 0.20 mL, 8 μmol) was added to a solution of [Cp(Me<sub>2</sub>CO<sub>2</sub>Et)Ru(NCMe<sub>3</sub>)<sub>3</sub>][PF<sub>6</sub>] (**19**, 3.90 mg, 7 μmol) in 1,2-dichloroethane (0.16 mL, aliquot from 0.04 M stock solution) at room temperature and the mixture was stirred for 5 min. Enyne **15d** (24.0 mg, 0.07 mmol) in 1,2-dichloroethane (0.36 mL) was added and H<sub>2</sub> was bubbled through the mixture

for 2 min before the flask was immersed into a pre-heated oil bath at 70 °C keeping a static H<sub>2</sub> atmosphere (ambient pressure, H<sub>2</sub> filled balloon). After stirring for 8 h at 70 °C, the mixture was allowed to cool to room temperature and the solvent was removed under reduced pressure. The crude product was purified by flash chromatography (silica, hexanes/EtOAc 1:0 – 20:1) to yield the title product as colorless oil (16.2 mg, 76%). <sup>1</sup>H NMR (400 MHz, CDCl<sub>3</sub>) δ 7.28 (t, *J* = 1.1 Hz, 1H), 3.93 (dp, *J* = 8.2, 6.0 Hz, 1H), 3.64 (t, *J* = 7.2 Hz, 1H), 2.36 (dd, *J* = 13.5, 1.1 Hz, 1H), 2.25 (s, 2H), 2.22 (d, *J* = 13.1 Hz, 1H), 1.95 – 1.85 (m, 1H), 1.85 – 1.76 (m, 2H), 1.43 – 1.32 (m, 1H), 1.22 (d, *J* = 6.1 Hz, 3H), 1.20 (s, 3H), 1.20 (s, 3H), 1.07 (s, 3H), 0.09 (s, 9H). <sup>13</sup>C NMR (101 MHz, CDCl<sub>3</sub>) δ 209.8, 171.2, 139.1, 85.0, 77.3, 75.7, 50.1, 38.9, 33.3, 32.7, 28.5, 28.5, 27.0, 23.2, 21.1, 2.7. IR (film)  $\tilde{\nu}$  2957, 2867, 1705, 1247, 1092 cm<sup>-1</sup>. HRMS (ESI<sup>+</sup>) for C<sub>18</sub>H<sub>32</sub>O<sub>3</sub>Si [M+Na]<sup>+</sup>: calcd 347.2013, found 347.2012.



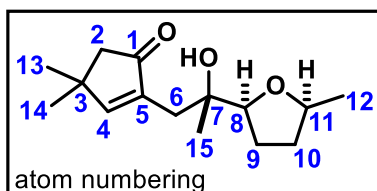

### Sinularone F

| <sup>13</sup> C<br>[#] | natural <sup>A</sup><br>δ <sup>13</sup> C [ppm] | synthetic <sup>B</sup><br>δ <sup>13</sup> C [ppm] | difference<br>Δδ <sup>13</sup> C [ppm] | drift corrected <sup>C</sup>           |
|------------------------|-------------------------------------------------|---------------------------------------------------|----------------------------------------|----------------------------------------|
|                        |                                                 |                                                   |                                        | difference<br>Δδ <sup>13</sup> C [ppm] |
| 1                      | 209,4                                           | 208,9                                             | 0,5                                    | 0                                      |
| 2                      | 49,8                                            | 49,3                                              | 0,5                                    | 0                                      |
| 3                      | 38,9                                            | 38,5                                              | 0,4                                    | -0,1                                   |
| 4                      | 170,7                                           | 170,2                                             | 0,5                                    | 0                                      |
| 5                      | 138,9                                           | 138,4                                             | 0,5                                    | 0                                      |
| 6                      | 32,2                                            | 31,7                                              | 0,5                                    | 0                                      |
| 7                      | 72,3                                            | 71,8                                              | 0,5                                    | 0                                      |
| 8                      | 85,2                                            | 84,7                                              | 0,5                                    | 0                                      |
| 9                      | 26,1                                            | 25,6                                              | 0,5                                    | 0                                      |
| 10                     | 33,2                                            | 32,7                                              | 0,5                                    | 0                                      |
| 11                     | 75,2                                            | 74,7                                              | 0,5                                    | 0                                      |
| 12                     | 21,4                                            | 20,9                                              | 0,5                                    | 0                                      |
| 13                     | 28,5                                            | 28,1                                              | 0,4                                    | -0,1                                   |
| 14                     | 28,5                                            | 28,0                                              | 0,5                                    | 0                                      |
| 15                     | 23,4                                            | 22,9                                              | 0,5                                    | 0                                      |

<sup>A</sup> 125 MHz, d<sub>6</sub>-DMSO

<sup>B</sup> 101 MHz, d<sub>6</sub>-DMSO

<sup>C</sup> 0.5 ppm systematic drift

### Trimethyl(((R\*)-2-((2S\*,5S\*)-5-methyltetrahydrofuran-2-yl)but-3-yn-2-yl)oxy)silane (**14d'**).

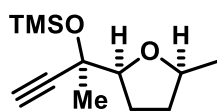

(0.24 mL, 2.08 mmol) was added to a solution of alcohol **14a'** (160 mg, 1.04 mmol) in CH<sub>2</sub>Cl<sub>2</sub> (4.00 mL). The mixture was cooled to 0 °C before TMSOTf (0.23 mL, 1.25 mmol) was slowly added. After 5 min, sat. aq. NH<sub>4</sub>Cl solution (1 mL) and water (1 mL) were introduced and the layers were separated. The aqueous phase was extracted with methyl *tert*-butyl ether (3 x 20 mL) and the combined organic layers were washed with brine and dried over MgSO<sub>4</sub>. The solvent was evaporated and the residue purified by flash chromatography (silica, hexanes/methyl *tert*-butyl ether 1:0 – 10:1) to give the title compound as a light yellow oil (208 mg, 89%). <sup>1</sup>H NMR (400 MHz, CDCl<sub>3</sub>) δ 4.12 – 4.02 (m, 1H), 3.87 (dd, *J* = 7.5, 5.4 Hz, 1H), 2.43 (s, 1H), 2.07 – 1.96 (m, 1H), 1.96 – 1.83 (m, 2H), 1.53 – 1.46 (m, 1H), 1.44 (s, 3H), 1.23 (d, *J* = 6.0 Hz, 3H), 0.19 (s, 9H). <sup>13</sup>C NMR (101 MHz, CDCl<sub>3</sub>) δ 87.3, 85.9, 76.8, 73.1, 71.3, 33.3, 27.6, 27.0, 21.2, 2.0. IR (film)  $\tilde{\nu}$  3310, 2969, 2870, 1249, 1081 cm<sup>-1</sup>. HRMS (ESI<sup>+</sup>) for C<sub>12</sub>H<sub>22</sub>O<sub>2</sub>Si [M+Na]<sup>+</sup>: calcd 249.1281, found 249.1282.



**(R\*)-7,7,9-Trimethyl-2-((2S\*,5S\*)-5-methyltetrahydrofuran-2-yl)-2-((trimethylsilyl)oxy)dec-8-en-3-yn-5-one (17).**

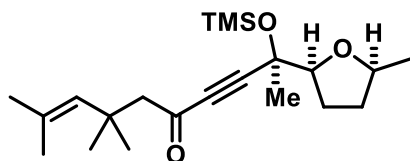

*n*-BuLi (1.6 M in hexanes, 0.51 mL, 0.82 mmol) was added dropwise to a stirred solution of alkyne **14d'** (200 mg, 0.88 mmol) in THF (2.8 ml) at 0 °C and the resulting mixture was stirred for 20 min at that temperature. The mixture was then cooled to – 78 °C before a solution of amide **18** (135 mg, 0.68 mmol) in THF (0.6 mL) was added. The mixture was allowed to reach 0 °C and stirring was continued for 2 h at that temperature. Sat. aq. NH<sub>4</sub>Cl solution (1 mL) and EtOAc (3 mL) were added and the layers were separated. The aqueous phase was extracted with EtOAc (3 x 10 mL) and the combined organic layers were washed with brine and dried over MgSO<sub>4</sub>. The solvent was evaporated and excess alkyne removed by bulb-to-bulb distillation (10<sup>-3</sup> mbar, 50 °C). The residue was purified by flash chromatography (silica, hexanes/EtOAc 1:0 – 40:1 – 20:1) to give the title compound as a colorless oil (193 mg, 78%). <sup>1</sup>H NMR (400 MHz, CDCl<sub>3</sub>) δ 5.21 (hept, *J* = 1.4 Hz, 1H), 4.11 – 4.02 (m, 1H), 3.88 – 3.82 (m, 1H), 2.66 (s, 2H), 2.05 – 1.86 (m, 3H), 1.72 (d, *J* = 1.4 Hz, 3H), 1.68 (d, *J* = 1.4 Hz, 3H), 1.56 – 1.49 (m, 1H), 1.48 (s, 3H), 1.23 (s, 6H), 1.22 (*J* = 6.2 Hz, 3H), 0.21 (s, 9H). <sup>13</sup>C NMR (101 MHz, CDCl<sub>3</sub>) δ 186.7, 132.4, 131.9, 93.8, 85.6, 85.5, 76.8, 71.8, 57.5, 35.6, 33.2, 29.5 (2C), 28.2, 28.0, 26.8, 21.2, 19.2, 2.0. IR (film)  $\tilde{\nu}$  2967, 2872, 2212, 1667, 1249, 1092 cm<sup>-1</sup>. HRMS (ESI<sup>+</sup>) for C<sub>21</sub>H<sub>36</sub>O<sub>3</sub>Si [M+Na]<sup>+</sup>: calcd 387.2326, found 387.2331.

**4,4-Dimethyl-2-((R\*)-2-((2S\*,5S\*)-5-methyltetrahydrofuran-2-yl)-2-((trimethylsilyl)oxy)propyl)cyclopent-2-en-1-one (S80).**

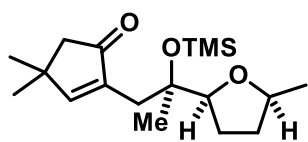

TBACl (0.02 M in 1,2-dichloroethane, 0.56 mL, 12 μmol) was added to solid [Cp(Me<sub>2</sub>CO<sub>2</sub>Et)Ru(NCMe<sub>3</sub>)] [PF<sub>6</sub>] (5.3 mg, 10 μmol) in a flame dried Schlenk tube under argon. The mixture was stirred for 5 min at room temperature before a solution of enyne **17** (36.0 mg, 0.10 mmol) in 1,2-dichloroethane (0.5 mL) was added. H<sub>2</sub> was bubbled through the mixture for 2 min before the flask was immersed into a pre-heated oil bath at 70 °C keeping a static H<sub>2</sub> atmosphere (ambient pressure, H<sub>2</sub> filled balloon). After stirring for 3 h at 70 °C, the mixture was allowed to cool to room temperature and the solvent was removed under reduced pressure. The crude product was purified by flash chromatography (silica, hexanes/EtOAc 1:0 – 20:1) to yield the title product as a pale yellow oil (22.0 mg, 67%). <sup>1</sup>H NMR (400 MHz, CDCl<sub>3</sub>) δ 7.23 (t, *J* = 0.9 Hz, 1H), 3.90 (dp, *J* = 8.4, 6.0 Hz, 1H), 3.65 (t, *J* = 7.3 Hz, 1H), 2.30 (m, 2H), 2.25 (s, 2H), 1.95 – 1.70 (m, 3H), 1.44 – 1.30 (m, 1H), 1.21 (d, *J* = 10.1 Hz, 3H), 1.21 (s, 6H), 1.15 (s, 3H), 0.11 (s, 9H). <sup>13</sup>C NMR (101 MHz, CDCl<sub>3</sub>) δ 209.8, 170.5, 139.2, 85.2, 76.9, 75.7, 50.1, 39.0, 33.5, 33.2, 28.6, 28.4, 26.5, 23.7, 21.0, 2.9. IR (film)  $\tilde{\nu}$  2957, 2867, 1708, 1248, 1091 cm<sup>-1</sup>. HRMS (ESI<sup>+</sup>) for C<sub>18</sub>H<sub>32</sub>O<sub>3</sub>Si [M+Na]<sup>+</sup>: calcd 347.2013, found 347.2011.

**(±)-Sinularone E (9).**

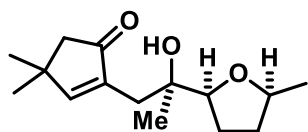

TBAF (1 M in THF, 0.11 mL, 0.11 mmol) was added to a solution of silyl ether **S80** (18.2 mg, 56 μmol) in THF (0.9 mL) at 0 °C. After 1 h, sat. aq. NH<sub>4</sub>Cl solution was added and the mixture was extracted with EtOAc (3 x 5 mL). The combined organic layers were washed with brine and dried over MgSO<sub>4</sub>. The solvent was evaporated and the residue purified by flash chromatography (silica, hexanes/EtOAc 4:1 – 2:1) to give the title compound as a colorless oil (13.7 mg, 97%). <sup>1</sup>H NMR (400 MHz, CDCl<sub>3</sub>) δ 7.28 (t, *J* = 1.0 Hz, 1H), 3.98 (dp, *J* = 7.9, 6.1 Hz, 1H), 3.70 (t, *J* = 7.3 Hz, 1H), 2.79 (br, 1H), 2.45 – 2.31 (m, 2H), 2.31 (s, 2H), 2.00 – 1.92 (m, 1H), 1.91 – 1.83 (m, 2H), 1.45 – 1.35 (m, 1H), 1.22 (s, 6H), 1.22

(d,  $J = 5.9$  Hz, 3H), 1.03 (s, 3H).  $^{13}\text{C}$  NMR (101 MHz,  $\text{CDCl}_3$ )  $\delta$  211.4, 172.0, 139.3, 85.4, 75.8, 73.0, 50.2, 39.4, 33.4 (2C), 28.4, 28.4, 26.2, 22.7, 21.2.  $^1\text{H}$  NMR (400 MHz,  $\text{DMSO}-d_6$ )  $\delta$  7.35 (t,  $J = 1.0$  Hz, 1H), 4.13 (br, 1H), 3.83 (m, 1H), 3.57 (dd,  $J = 7.6, 6.6$  Hz, 1H), 2.27 (dd,  $J = 13.8, 0.9$  Hz, 1H), 2.19 (s, 2H), 2.08 (dd,  $J = 13.8, 1.2$  Hz, 1H), 1.92 – 1.70 (m, 3H), 1.33 – 1.23 (m, 1H), 1.15 (s, 6H), 1.13 (d,  $J = 6.1$  Hz, 3H), 0.87 (s, 3H).  $^{13}\text{C}$  NMR (101 MHz,  $\text{DMSO}-d_6$ )  $\delta$  208.9, 170.3, 138.3, 84.7, 74.8, 72.0, 49.3, 38.5, 33.0, 32.8, 28.1, 28.0, 25.8, 21.4, 20.9. IR (film)  $\tilde{\nu}$  3446, 2962, 2867, 1689, 1091  $\text{cm}^{-1}$ . HRMS (ESI $^+$ ) for  $\text{C}_{15}\text{H}_{24}\text{O}_3$   $[\text{M}+\text{Na}]^+$ : calcd 275.1618, found 275.1619. The spectral data is consistent with previously reported values.<sup>[26]</sup>

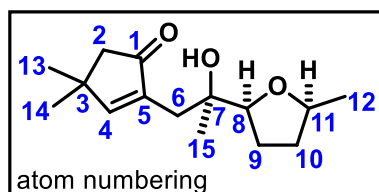

| $^{13}\text{C}$<br>[#] | natural <sup>A</sup><br>$\delta^{13}\text{C}$ [ppm] | synthetic <sup>B</sup><br>$\delta^{13}\text{C}$ [ppm] | difference<br>$\Delta\delta^{13}\text{C}$ [ppm] | drift corrected <sup>C</sup>                    |
|------------------------|-----------------------------------------------------|-------------------------------------------------------|-------------------------------------------------|-------------------------------------------------|
|                        |                                                     |                                                       |                                                 | difference<br>$\Delta\delta^{13}\text{C}$ [ppm] |
| 1                      | 209,4                                               | 208,9                                                 | 0,5                                             | 0                                               |
| 2                      | 49,8                                                | 49,3                                                  | 0,5                                             | 0                                               |
| 3                      | 38,9                                                | 38,5                                                  | 0,4                                             | -0,1                                            |
| 4                      | 170,8                                               | 170,3                                                 | 0,5                                             | 0                                               |
| 5                      | 138,8                                               | 138,3                                                 | 0,5                                             | 0                                               |
| 6                      | 33,5                                                | 33,0                                                  | 0,5                                             | 0                                               |
| 7                      | 72,5                                                | 72,0                                                  | 0,5                                             | 0                                               |
| 8                      | 85,2                                                | 84,7                                                  | 0,5                                             | 0                                               |
| 9                      | 26,2                                                | 25,8                                                  | 0,4                                             | -0,1                                            |
| 10                     | 33,3                                                | 32,8                                                  | 0,5                                             | 0                                               |
| 11                     | 75,3                                                | 74,8                                                  | 0,5                                             | 0                                               |
| 12                     | 21,3                                                | 20,9                                                  | 0,4                                             | -0,1                                            |
| 13                     | 28,6                                                | 28,1                                                  | 0,5                                             | 0                                               |
| 14                     | 28,4                                                | 28,0                                                  | 0,4                                             | -0,1                                            |
| 15                     | 21,9                                                | 21,4                                                  | 0,5                                             | 0                                               |

<sup>A</sup> 125 MHz,  $d_6$ -DMSO

<sup>B</sup> 101 MHz,  $d_6$ -DMSO

<sup>C</sup> 0.5 ppm systematic drift

**1-((2S\*,2'S\*,4S\*,5R\*,5'S\*)-2,5'-Dimethyl-5-(2-(trimethylsilyl)ethoxy)octahydro-[2,2'-bifuran]-4-yl)-**

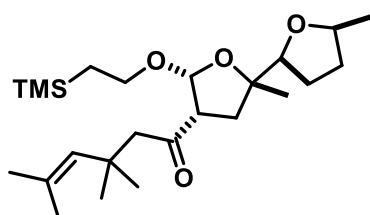

**3,3,5-trimethylhex-4-en-1-one (16).** According to Representative

Procedure A from enyne **15b** (24.0 mg, 57  $\mu\text{mol}$ ); 68% (NMR), dr.= 6:1.

*Major diastereomer*: colorless oil (8.8 mg, 36%):  $^1\text{H}$  NMR (600 MHz,

$\text{CDCl}_3$ )  $\delta$  5.26 (d,  $J = 5.1$  Hz, 1H), 5.20 (hept,  $J = 1.4$  Hz, 1H), 3.98 (m, 1H),

3.90 (t,  $J = 7.4$  Hz, 1H), 3.80 (ddd,  $J = 10.9, 9.7, 6.1$  Hz, 1H), 3.40 (ddd,

$J = 11.0, 9.7, 5.9$  Hz, 1H), 3.23 (ddd,  $J = 11.9, 7.9, 5.1$  Hz, 1H), 2.63 (d,

$J = 15.6$  Hz, 1H), 2.44 (d,  $J = 15.6$  Hz, 1H), 2.28 (t,  $J = 12.3$  Hz, 1H), 1.98 – 1.86 (m, 2H), 1.72 (d,  $J = 1.3$  Hz,

3H), 1.68 (d,  $J = 1.5$  Hz, 3H), 1.66 – 1.58 (m, 2H), 1.41 – 1.35 (m, 1H), 1.24 (d,  $J = 6.0$  Hz, 3H), 1.20 (s, 4H),

1.19 (s, 4H), 1.18 (s, 3H), 0.84 (qdd,  $J = 13.8, 10.8, 5.9$  Hz, 2H), -0.02 (s, 9H).  $^{13}\text{C}$  NMR (101 MHz,  $\text{CDCl}_3$ )

$\delta$  204.5, 133.3, 131.1, 102.5, 86.5, 85.9, 76.1, 64.6, 57.7, 54.7, 34.9, 33.3, 32.5, 29.6, 29.2, 28.2, 27.5, 22.0, 21.0, 19.2, 18.1, -1.3. IR (film)  $\tilde{\nu}$  2965, 1719, 1363, 1248, 1098, 1017  $\text{cm}^{-1}$ . HRMS (ESI<sup>+</sup>) for  $\text{C}_{24}\text{H}_{44}\text{O}_4\text{Si}$   $[\text{M}+\text{Na}]^+$ : calcd 447.2901, found 447.2908.

*Minor diastereomer*: colorless oil (2.5 mg, 10%):  $^1\text{H}$  NMR (600 MHz,  $\text{CDCl}_3$ )  $\delta$  5.24 (d,  $J = 5.2$  Hz, 1H), 5.20

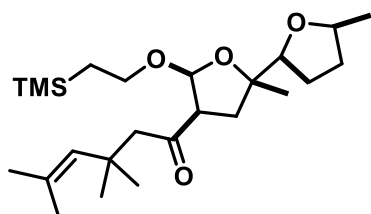

(hept,  $J = 1.4$  Hz, 1H), 3.99 (m, 1H), 3.79 (td,  $J = 9.8, 6.7$  Hz, 1H), 3.72 (t,  $J = 7.4$  Hz, 1H), 3.41 (ddd,  $J = 10.3, 9.6, 6.2$  Hz, 1H), 3.33 (ddd,  $J = 11.3, 8.6, 5.2$  Hz, 1H), 2.61 (d,  $J = 15.5$  Hz, 1H), 2.42 (d,  $J = 15.6$  Hz, 1H), 2.26 (dd,  $J = 12.7, 11.3$  Hz, 1H), 1.93 (dd,  $J = 12.7, 8.6$  Hz, 1H), 1.92 (m, 1H), 1.80 (m, 2H), 1.72 (d,  $J = 1.3$  Hz, 3H), 1.68 (d,  $J = 1.5$  Hz, 3H), 1.44 (m, 1H), 1.29 (s, 3H), 1.21 (d,  $J = 6.1$  Hz, 3H), 1.19 (s, 3H), 1.19 (s, 3H), 0.86 (m,

2H), -0.01 (s, 9H).  $^{13}\text{C}$  NMR (101 MHz,  $\text{CDCl}_3$ )  $\delta$  204.7, 133.3, 130.8, 102.8, 85.4, 85.4, 75.7, 64.4, 58.9, 54.4, 34.6, 33.8, 33.0, 29.4, 29.1, 28.0, 26.7, 25.1, 21.2, 19.0, 18.1, -1.4.

**Table S4:** Detailed NMR analysis of the major diastereomer ( $\text{CDCl}_3$ , 600 MHz)

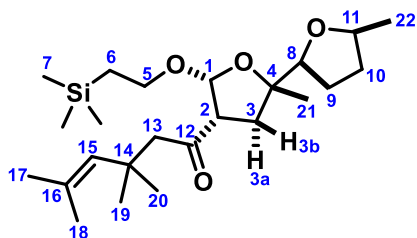

| Atom<br>[#] | $\delta$ [ppm] | $J$ [Hz]        | COSY       | HMBC            | NOESY                               |
|-------------|----------------|-----------------|------------|-----------------|-------------------------------------|
| 1           | 102.33         |                 |            | 3b              |                                     |
| 1           | 5.26           | 5.1             | 2          | 3, 4, 5         | 2, 5a, 5b, 6a, 6b, 13a, 13b, 18, 21 |
| 2           | 57.49          |                 |            | 3a, 3b          |                                     |
| 2           | 3.23           | 5.1, 7.9, 11.9  | 1, 3a, 3b  |                 | 1, 3b, 13a, 13b, 15, 21             |
| 3           | 32.34          |                 |            | 1, 21           |                                     |
| 3a          | 2.28           | 11.9, 12.3      | 2, 3b      | 2, 4, 8, 12, 21 | 3b, 8, 9a, 9b, 10b                  |
| 3b          | 1.61           | 7.9, 12.3       | 2, 3a      | 1, 2, 21        | 2, 3a, 21                           |
| 4           | 86.30          |                 |            | 1, 3a, 8, 21    |                                     |
| 5           | 64.45          |                 |            | 1, 6a, 6b       |                                     |
| 5a          | 3.80           | 6.1, 9.7, 10.8  | 5b, 6a, 6b |                 | 1, 7, 8                             |
| 5b          | 3.40           | 9.7, 11.0, 5.8  | 5a, 6a, 6b |                 | 1, 7                                |
| 6           | 17.98          |                 |            | 7               |                                     |
| 6a          | 0.86           | 10.8, 5.8, 14.0 | 5a, 5b     | 5               | 1, 7                                |
| 6b          | 0.81           | 6.1, 11.0, 14.0 | 5a, 5b     | 5               | 1, 7                                |
| 7           | -1.45          |                 |            | 7               |                                     |
| 7           | -0.02          |                 |            | 6, 7            | 5a, 5b, 6a, 6b, 8, 19, 20           |
| 8           | 85.77          |                 |            | 3a              |                                     |
| 8           | 3.90           | 7.4, 7.4        | 9a, 9b     | 4, 21           | 3a, 5a, 7, 9a, 10a, 11, 21          |
| 9           | 27.33          |                 |            |                 |                                     |

|            |              |               |  |              |                          |                             |
|------------|--------------|---------------|--|--------------|--------------------------|-----------------------------|
| <b>9a</b>  | 1.90         | 7.4           |  | 8, 9b        | 10                       | 3a, 8, 9b, 11               |
| <b>9b</b>  | 1.63         | 7.4           |  | 8, 9a, 10b   |                          | 3a, 9a, 10a, 21, 22         |
| <b>10</b>  | 33.15        |               |  |              | 9a, 22                   |                             |
| <b>10a</b> | 1.93         |               |  | 10b, 11      |                          | 8, 9b, 10b, 11, 22          |
| <b>10b</b> | 1.38         |               |  | 9b, 10a, 11  |                          | 3a, 10a, 11, 21, 22         |
| <b>11</b>  | 75.90        |               |  |              | 22                       |                             |
| <b>11</b>  | 3.98         | 6.1, 8.1, 6.0 |  | 10a, 10b, 22 |                          | 8, 9a, 10a, 10b, 22         |
| <b>12</b>  | 204.38       |               |  |              | 3a, 13a, 13b             |                             |
| <b>13</b>  | 54.53        |               |  |              | 15, 19, 20               |                             |
| <b>13a</b> | 2.63         | 15.6          |  | 13b          | 12, 14, 15, 19, 20       | 1, 2, 15, 18, 19, 20        |
| <b>13b</b> | 2.44         | 15.6          |  | 13a          | 12, 14, 15, 19, 20       | 1, 2, 15, 18, 19, 20        |
| <b>14</b>  | 34.72        |               |  |              | 13a, 13b, 15, 19, 20     |                             |
| <b>15</b>  | 133.18       |               |  |              | 13a, 13b, 17, 18, 19, 20 |                             |
| <b>15</b>  | 5.20         | 1.5, 1.4      |  | 17, 18       | 13, 14, 17, 18           | 2, 13a, 13b, 17, 18, 19, 20 |
| <b>16</b>  | 130.92       |               |  |              | 17, 18                   |                             |
| <b>17</b>  | 28.01        |               |  |              | 15, 18                   |                             |
| <b>17</b>  | 1.68         | 1.5           |  | 15           | 15, 16, 18               | 15                          |
| <b>18</b>  | 19.04        |               |  |              | 15, 17                   |                             |
| <b>18</b>  | 1.72         | 1.4           |  | 15           | 15, 16, 17               | 1, 13a, 13b, 15, 19, 20     |
| <b>19</b>  | 29.02, 29.46 |               |  |              | 13a, 13b, 20             |                             |
| <b>19</b>  | 1.19, 1.20   |               |  |              | 13, 14, 15, 20           | 7, 13a, 13b, 15, 18         |
| <b>20</b>  | 29.02, 29.46 |               |  |              | 13a, 13b, 19             |                             |
| <b>20</b>  | 1.19, 1.20   |               |  |              | 13, 14, 15, 19           | 7, 13a, 13b, 15, 18         |
| <b>21</b>  | 21.85        |               |  |              | 3a, 3b, 8                |                             |
| <b>21</b>  | 1.18         |               |  |              | 3, 4                     | 1, 2, 3b, 8, 9b, 10b        |
| <b>22</b>  | 20.85        |               |  |              |                          |                             |
| <b>22</b>  | 1.24         | 6.1           |  | 11           | 10, 11                   | 9b, 10a, 10b, 11            |

**Table S5:** Detailed NMR analysis of the minor diastereomer (CDCl<sub>3</sub>, 600 MHz)

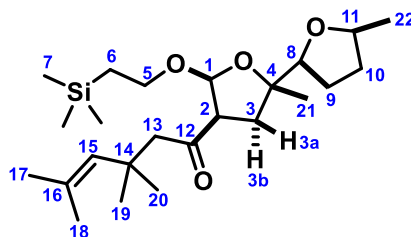

| Atom [#]  | $\delta$ [ppm] | J [Hz]         | COSY      | HMBC         | NOESY                 |
|-----------|----------------|----------------|-----------|--------------|-----------------------|
| <b>C</b>  |                |                |           |              |                       |
| <b>H</b>  |                |                |           |              |                       |
| <b>1</b>  | 102.81         |                |           | 3b           |                       |
| <b>1</b>  | 5.24           | 5.2            | 2         | 2, 3, 4, 5   | 2, 5a, 5b, 13a, 13b   |
| <b>2</b>  | 58.86          |                |           | 1, 3a, 3b    |                       |
| <b>2</b>  | 3.33           | 8.6, 11.3, 5.2 | 1, 3a, 3b |              | 1, 8, 13a, 19, 20, 22 |
| <b>3</b>  | 33.75          |                |           | 1, 21        |                       |
| <b>3a</b> | 2.26           | 11.3, 12.8     | 2, 3b     | 2, 4, 12, 21 | 21                    |
| <b>3b</b> | 1.93           | 8.6, 12.8      | 2, 3a     | 1, 2, 4      | 8                     |

|            |              |                |              |                          |                      |
|------------|--------------|----------------|--------------|--------------------------|----------------------|
| <b>4</b>   | 85.40        |                |              |                          | 1, 3a, 3b, 9, 21     |
| <b>5</b>   | 64.36        |                |              |                          | 1, 6                 |
| <b>5a</b>  | 3.79         | 9.6, 10.0, 6.7 | 5b, 6        |                          | 1, 7, 21             |
| <b>5b</b>  | 3.41         | 9.6, 6.2, 10.3 | 5a, 6        |                          | 1, 7                 |
| <b>6</b>   | 18.06        |                |              | 7                        |                      |
| <b>6a</b>  | 0.86         |                | 5a, 5b       | 5                        | 7                    |
| <b>6b</b>  | -1.40        |                |              | 7                        |                      |
| <b>7</b>   | -0.01        |                |              | 6, 7                     | 5a, 5b, 6, 21        |
| <b>7</b>   | 85.37        | 7.4, 7.4       |              |                          |                      |
| <b>8</b>   | 3.72         |                | 9            |                          | 2, 3b, 9, 11, 21     |
| <b>8</b>   | 26.71        |                |              |                          |                      |
| <b>9</b>   | 1.80         |                | 8, 10a, 10b  | 4, 10, 11                | 8, 21                |
| <b>9a</b>  | 33.04        |                |              | 9, 22                    |                      |
| <b>9b</b>  | 1.92         |                | 9, 10b, 11   |                          | 10b, 11              |
| <b>10</b>  | 1.44         |                | 9, 10a, 11   |                          | 10a, 22              |
| <b>10a</b> | 75.67        |                |              | 9, 22                    |                      |
| <b>10b</b> | 3.99         | 6.1            | 10a, 10b, 22 |                          | 8, 10a, 22           |
| <b>11</b>  | 204.66       |                |              | 3a, 13a, 13b             |                      |
| <b>11</b>  | 54.41        |                |              | 15, 19, 20               |                      |
| <b>12</b>  | 2.61         | 15.6           | 13b          | 12, 14, 15, 19, 20       | 1, 2, 15, 18, 19, 20 |
| <b>13</b>  | 2.42         | 15.6           | 13a          | 12, 14, 15, 19, 20       | 1, 18, 19, 20        |
| <b>13a</b> | 34.63        |                |              | 13a, 13b, 15, 19, 20     |                      |
| <b>13b</b> | 133.31       |                |              | 13a, 13b, 17, 18, 19, 20 |                      |
| <b>14</b>  | 5.20         | 1.3, 1.5       | 17           | 13, 14, 17, 18, 19, 20   | 13a, 17, 19, 20      |
| <b>15</b>  | 130.84       |                |              | 17, 18                   |                      |
| <b>15</b>  | 28.03        |                |              | 15, 18                   |                      |
| <b>16</b>  | 1.68         | 1.5            | 15           | 15, 16, 18               | 15                   |
| <b>17</b>  | 19.04        |                |              | 15, 17                   |                      |
| <b>17</b>  | 1.72         | 1.4            |              | 15, 16, 17               | 13a, 13b, 19, 20     |
| <b>18</b>  | 29.09, 29.39 |                |              | 13a, 13b, 15, 20         |                      |
| <b>18</b>  | 1.19, 1.19   |                |              | 13, 14, 15, 20           | 2, 13a, 13b, 15, 18  |
| <b>19</b>  | 29.09, 29.39 |                |              | 13a, 13b, 15, 19         |                      |
| <b>19</b>  | 1.19, 1.19   |                |              | 13, 14, 15, 19           | 2, 13a, 13b, 15, 18  |
| <b>20</b>  | 25.07        |                |              | 3a                       |                      |
| <b>20</b>  | 1.29         |                |              | 3, 4                     | 3a, 5a, 7, 8, 9      |
| <b>21</b>  | 21.18        |                |              |                          |                      |
| <b>21</b>  | 1.21         | 6.1            | 11           | 10, 11                   | 2, 10b, 11           |
| <b>22</b>  | 20.85        |                |              |                          |                      |
| <b>22</b>  | 1.24         |                |              |                          |                      |

## C-H INSERTIONS

**5-(Benzyloxy)-5-methylhex-3-yn-2-one (20a).** *n*-BuLi (1.6 M, 1.23 mL, 1.96 mmol) was added to a solution of the alkyne **S5** (300 mg, 1.72 mmol) in THF (18.8 mL) at 0 °C and the resulting mixture was stirred for 30 min at that temperature. A solution of *N*-methoxy-*N*-methylacetamide (0.28 mL, 2.68 mmol) in THF (1 mL) was added and stirring continued for 30 min at room temperature before sat. NH<sub>4</sub>Cl solution was introduced. The mixture was extracted with EtOAc (3 x 50 mL) and the combined organic layers were washed with brine and dried over MgSO<sub>4</sub>. The solvent was evaporated and the residue purified by flash chromatography (silica, hexanes/EtOAc 20:1 – 10:1) to yield the title compound as a colorless oil (213 mg, 57%). <sup>1</sup>H NMR (400 MHz, CDCl<sub>3</sub>) δ 7.30 – 7.18 (m, 5H), 4.54 (s, 2H), 2.26 (s, 3H), 1.51 (s, 6H). <sup>13</sup>C NMR (101 MHz, CDCl<sub>3</sub>) δ 184.4, 138.5, 128.5, 127.8, 127.7, 93.4, 84.0, 70.7, 67.1, 32.9, 28.4. IR (film)  $\tilde{\nu}$  2987, 2213, 1680, 1359, 1244, 1158, 1051 cm<sup>-1</sup>. HRMS (Cl<sup>+</sup>) for C<sub>14</sub>H<sub>16</sub>O<sub>2</sub> [M+H]<sup>+</sup>: calcd 217.1223, found 216.1224.

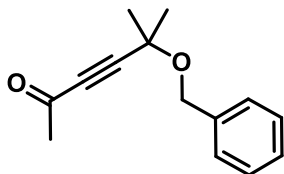

**1-((2S\*,3R\*)-5,5-Dimethyl-2-phenyltetrahydrofuran-3-yl)ethan-1-one (21).** According to Representative Procedure A from alkyne **20a** (25.5 mg, 0.12 mmol); colorless oil (12.8 mg, 50%, dr = 17:1). <sup>1</sup>H NMR (400 MHz, CDCl<sub>3</sub>) δ 7.34 – 7.21 (m, 5H), 5.32 (d, *J* = 8.5 Hz, 1H), 3.65 (td, *J* = 8.4, 7.1 Hz, 1H), 2.36 (dd, *J* = 12.8, 7.1 Hz, 1H), 1.91 (dd, *J* = 12.8, 8.3 Hz, 1H), 1.55 (s, 3H), 1.53 (s, 3H), 1.34 (s, 3H). <sup>13</sup>C NMR (101 MHz, CDCl<sub>3</sub>) δ 207.6, 138.9, 128.5, 128.2, 127.0, 81.3, 80.8, 58.5, 40.5, 30.8, 28.4, 27.3. IR (film)  $\tilde{\nu}$  2970, 2871, 1709, 1455, 1367, 1294, 1165 cm<sup>-1</sup>. HRMS (Cl<sup>+</sup>) for C<sub>14</sub>H<sub>28</sub>O<sub>2</sub> [M]<sup>+</sup>: calcd 218.1301, found 218.1300.

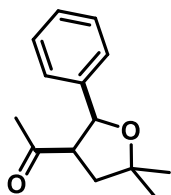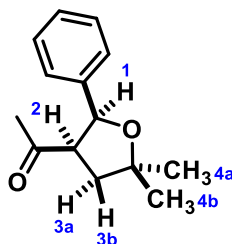

**diagnostic NOEs:**

H(1) - CH<sub>3</sub>(4a)

H(2) - CH<sub>3</sub>(4a)

H(3a) - CH<sub>3</sub>(4a)

H(3b) - CH<sub>3</sub>(4b)

H(1) - H(2)

**5-Methyl-5-((tetrahydro-2H-pyran-2-yl)oxy)hex-3-yn-2-one (20b).** *n*-BuLi (1.6 M, 1.23 mL, 1.96 mmol) was added to a solution of alkyne **S6** (300 mg, 1.78 mmol) in THF (18.8 mL) at 0 °C and the resulting mixture was stirred for 30 min at that temperature. A solution of *N*-methoxy-*N*-methylacetamide (0.28 mL, 2.68 mmol) in THF (1 mL) was added and stirring continued for 30 min at room temperature before sat. NH<sub>4</sub>Cl solution was added. The mixture was extracted with EtOAc (3 x 50 mL) and the combined organic layers were washed with brine and dried over MgSO<sub>4</sub>. The solvent was evaporated and the residue purified by flash chromatography (silica, hexanes/EtOAc 20:1 – 10:1) to yield the title compound as a colorless oil (236 mg, 63%). <sup>1</sup>H NMR (400 MHz, CDCl<sub>3</sub>) δ 5.02 – 4.98 (m, 1H), 4.00 – 3.90 (m, 1H), 3.55 – 3.47 (m, 1H), 2.34 (s, 3H), 1.91 – 1.76 (m, 1H), 1.78 – 1.65 (m, 1H), 1.61 – 1.42 (m, 4H), 1.58 (s, 3H), 1.53 (s, 3H). <sup>13</sup>C NMR (101 MHz, CDCl<sub>3</sub>) δ 184.5, 96.3, 94.0, 83.4, 70.6, 63.4, 32.9, 31.9, 29.7, 29.4, 25.4, 20.3. IR (film)  $\tilde{\nu}$  2942, 2214, 1681, 1358, 1245, 1022 cm<sup>-1</sup>. HRMS (Cl<sup>+</sup>) for C<sub>12</sub>H<sub>18</sub>O<sub>3</sub> [M+H]<sup>+</sup>: calcd 211.1329, found 211.1326.

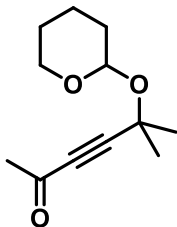

**1-((4S\*,5S\*)-2,2-Dimethyl-1,6-dioxaspiro[4.5]decan-4-yl)ethan-1-one (22).** According to Representative

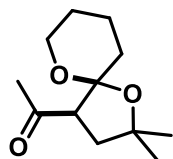

Procedure A from alkyne **20b** (24.7 mg, 0.12 mmol); colorless oil (11.3 mg, 45%, dr = 7:1).

$^1\text{H}$  NMR (600 MHz,  $\text{CDCl}_3$ , major isomer):  $\delta$  3.86 (td,  $J = 12.2, 11.8, 3.2$  Hz, 1H), 3.61 – 3.55 (m, 1H), 2.89 (dd,  $J = 11.6, 8.2$  Hz, 1H), 2.49 (t,  $J = 11.9$  Hz, 1H), 2.23 (s, 3H), 1.98 (dd,  $J = 13.5, 8.2$  Hz, 1H), 1.89 (dd,  $J = 12.2, 8.2$  Hz, 1H), 1.86 – 1.80 (m, 1H), 1.66 (m, 2H), 1.51 (m, 2H), 1.40 (s, 3H), 1.21 (s, 3H).  $^{13}\text{C}$  NMR (101 MHz,  $\text{CDCl}_3$ , major isomer):  $\delta$  206.0, 105.2,

80.8, 61.9, 61.2, 39.3, 34.0, 30.2 (2C), 29.5, 25.1, 20.1. IR (film)  $\tilde{\nu}$  2941, 2874, 1712, 1595, 1364  $\text{cm}^{-1}$ . HRMS ( $\text{Cl}^+$ ) for  $\text{C}_{12}\text{H}_{20}\text{O}_3$  [ $\text{M}+\text{H}$ ] $^+$ : calcd 213.1485, found 213.1486.

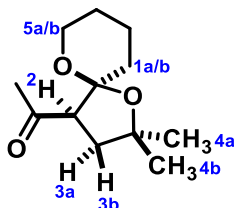

**diagnostic NOEs:**

H(2) -  $\text{CH}_3$ (4a)

H(2) - H(1a/b)

H(3a) - H(2)

H(3a) - H(4a)

H(5a/b) -  $\text{CH}_3$ (4b)

**4-(1-(Methoxymethoxy)cyclohexyl)but-3-yn-2-one (23a).** *n*-BuLi (1.6 M, 1.23 mL, 1.96 mmol) was added

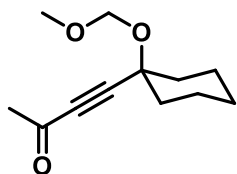

to a solution of alkyne **S27** (300 mg, 1.78 mmol) in THF (18.8 mL) at 0 °C and the resulting mixture was stirred for 30 min at that temperature. A solution of *N*-methoxy-*N*-methylacetamide (0.28 mL, 2.68 mmol) in THF (1 mL) was added and stirring was continued for 30 min at room temperature before sat.  $\text{NH}_4\text{Cl}$  solution was introduced. The mixture was extracted with EtOAc (3 x 50 mL) and the

combined organic layers were washed with brine and dried over  $\text{MgSO}_4$ . The solvent was evaporated and the residue purified by flash chromatography (silica, hexanes/EtOAc 20:1 – 10:1) to yield the title compound as a colorless oil (293 mg, 78%).  $^1\text{H}$  NMR (400 MHz,  $\text{CDCl}_3$ )  $\delta$  4.90 (s, 2H), 3.42 (s, 3H), 2.36 (s, 3H), 1.99 (m, 2H), 1.76 – 1.65 (m, 4H), 1.61 – 1.49 (m, 3H), 1.37 – 1.25 (m, 1H).  $^{13}\text{C}$  NMR (101 MHz,  $\text{CDCl}_3$ )  $\delta$  184.3, 93.1, 92.7, 85.9, 74.4, 56.1, 37.9, 33.0, 25.2, 22.9. IR (film)  $\tilde{\nu}$  2935, 2860, 2216, 1681, 1358, 1211  $\text{cm}^{-1}$ . HRMS (ESI $^+$ ) for  $\text{C}_{12}\text{H}_{13}\text{O}_3$  [ $\text{M}+\text{Na}$ ] $^+$ : calcd 233.1148, found 233.1151.

**3-(1-(Methoxymethoxy)cyclohexyl)-1-phenylprop-2-yn-1-one (23b).** *n*-BuLi (1.6 M, 1.23 mL, 1.96 mmol)

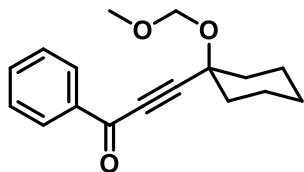

was added to a solution of alkyne **S27** (300 mg, 1.78 mmol) in THF (18.8 mL) at 0 °C and the resulting mixture was stirred for 30 min at that temperature. A solution of *N*-methoxy-*N*-methylbenzamide (441 mg, 2.68 mmol) in THF (1 mL) was added and stirring was continued for 30 min at room temperature before sat.  $\text{NH}_4\text{Cl}$  solution was introduced. The mixture was extracted with

EtOAc (3 x 50 mL) and the combined organic layers were washed with brine and dried over  $\text{MgSO}_4$ . The solvent was evaporated and the residue purified by flash chromatography (silica, hexanes/EtOAc 20:1 – 10:1) to yield the title compound as a colorless oil (410 mg, 85%).  $^1\text{H}$  NMR (400 MHz,  $\text{CDCl}_3$ )  $\delta$  8.17 – 8.11 (m, 2H), 7.61 (tt,  $J = 7.9, 1.3$  Hz, 1H), 7.52 – 7.45 (m, 2H), 4.99 (s, 2H), 3.45 (s, 3H), 2.16 – 2.07 (m, 2H), 1.78 (m, 4H), 1.70 – 1.52 (m, 3H), 1.35 (m, 1H).  $^{13}\text{C}$  NMR (101 MHz,  $\text{CDCl}_3$ )  $\delta$  177.8, 136.9, 134.3, 129.7, 128.8, 95.2, 93.2, 84.2, 74.6, 56.1, 38.0, 25.2, 23.0. IR (film)  $\tilde{\nu}$  2935, 2206, 1644, 1449, 1247, 1017  $\text{cm}^{-1}$ . HRMS (ESI $^+$ ) for  $\text{C}_{17}\text{H}_{20}\text{O}_3$  [ $\text{M}+\text{Na}$ ] $^+$ : calcd 295.1308, found 295.1305.

**1-((2S\*,3R\*)-2-Methoxy-1-oxaspiro[4.5]decan-3-yl)ethan-1-one (24a).** According to Representative Procedure A from alkyne **23a** (22.3 mg, 0.11 mmol); colorless oil (14.7 mg, 65%, dr = 6:1). <sup>1</sup>H NMR (400 MHz, CDCl<sub>3</sub>) δ 5.16 (d, *J* = 4.9 Hz, 1H), 3.31 (s, 3H), 3.21 (ddd, *J* = 11.3, 8.6, 4.9 Hz, 1H), 2.24 – 2.18 (m, 1H), 2.17 (s, 3H), 1.84 (dd, *J* = 12.6, 8.6 Hz, 1H), 1.73 – 1.60 (m, 4H), 1.52 (m, 1H), 1.47 – 1.29 (m, 5H). <sup>13</sup>C NMR (101 MHz, CDCl<sub>3</sub>) δ 204.2, 103.2, 85.2, 57.8, 54.4, 40.3, 38.2, 29.7, 25.4, 23.9. IR (film)  $\tilde{\nu}$  2929, 1716, 1448, 1362, 1110, 1041 cm<sup>-1</sup>. HRMS (ESI<sup>+</sup>) for C<sub>12</sub>H<sub>20</sub>O<sub>3</sub> [M+Na]<sup>+</sup>: calcd 235.1305, found 235.1306.

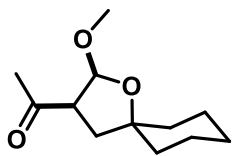

**((2S\*,3R\*)-2-Methoxy-1-oxaspiro[4.5]decan-3-yl)(phenyl)methanone (24b).** According to Representative Procedure A from alkyne **23b** (30.6 mg, 0.11 mmol) with 5 mol% [Cp\**RuCl*]<sub>4</sub> over 16 h; colorless oil (15.6 mg, 51%, dr = 8:1). Single crystals suitable for X-ray analysis were obtained by storage of the neat material at –20 °C. <sup>1</sup>H NMR (400 MHz, CDCl<sub>3</sub>) δ 8.00 – 7.92 (m, 2H), 7.60 – 7.52 (m, 1H), 7.47 (m, 2H), 5.24 (d, *J* = 5.0 Hz, 1H), 4.06 (ddd, *J* = 11.0, 8.5, 5.0 Hz, 1H), 3.14 (s, 3H), 2.58 (dd, *J* = 12.7, 11.0 Hz, 1H), 1.94 (dd, *J* = 12.7, 8.5 Hz, 1H), 1.79 – 1.33 (m, 10H). <sup>13</sup>C NMR (101 MHz, CDCl<sub>3</sub>) δ 195.3, 137.6, 133.0, 128.8, 128.1, 103.9, 84.8, 54.6, 53.0, 40.3, 38.5, 34.7, 25.5, 24.1, 24.0. IR (film)  $\tilde{\nu}$  2930, 2856, 1686, 1448, 1218, 1109, 1039 cm<sup>-1</sup>. HRMS (EI<sup>+</sup>) for C<sub>17</sub>H<sub>22</sub>O<sub>3</sub> [M]<sup>+</sup>: calcd 274.1569, found 274.1572.

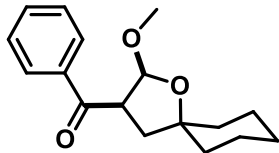

**Methyl 3-(1-(methoxymethoxy)cyclohexyl)propiolate (25).** *n*-BuLi (1.6 M, 1.23 mL, 1.96 mmol) was added to a solution of alkyne **S27** (300 mg, 1.78 mmol) in THF (18.8 mL) at 0 °C and the resulting mixture was stirred for 30 min at that temperature. A solution of methyl chloroformate (337 mg, 3.57 mmol) in THF (1 mL) was added at –78 °C, the mixture was allowed to warm to room temperature and stirring was continued for 30 min before sat. aq. NaHCO<sub>3</sub> solution (10 mL) was added. The mixture was extracted with EtOAc (3 x 50 mL) and the combined organic layers were washed with brine and dried over MgSO<sub>4</sub>. The solvent was evaporated and the residue purified by flash chromatography (silica, hexanes/EtOAc 10:1) to yield the title compound as a colorless oil (385 mg, 89%). <sup>1</sup>H NMR (400 MHz, CDCl<sub>3</sub>) δ 4.89 (s, 2H), 3.77 (s, 3H), 3.41 (s, 3H), 2.05 – 1.94 (m, 2H), 1.76 – 1.48 (m, 7H), 1.37 – 1.17 (m, 1H). <sup>13</sup>C NMR (101 MHz, CDCl<sub>3</sub>) δ 154.0, 93.1, 88.7, 78.0, 74.3, 56.1, 52.9, 37.8, 25.2, 22.8. IR (film)  $\tilde{\nu}$  2937, 2229, 1715, 1435, 1238, 1017 cm<sup>-1</sup>. HRMS (ESI<sup>+</sup>) for C<sub>12</sub>H<sub>18</sub>O<sub>4</sub> [M+Na]<sup>+</sup>: calcd 249.1098, found 249.1010.

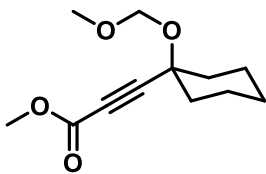

**3-(1-(Methoxymethoxy)cyclohexyl)-*N,N*-dimethylpropiolamide (26).** *n*-BuLi (1.6 M, 0.49 mL, 0.79 mmol) was added to a solution of alkyne **S27** (111 mg, 0.67 mmol) in THF (10.0 mL) at 0 °C and the resulting mixture was stirred for 30 min at that temperature. A solution of dimethylcarbonyl chloride (142 mg, 1.32 mmol) in THF (1 mL) was added at –78 °C, the mixture was allowed to warm to room temperature and stirring was continued for 30 min before sat. aq. NaHCO<sub>3</sub> solution (10 mL) was introduced. The mixture was extracted with EtOAc (3 x 50 mL) and the combined organic layers were washed with brine and dried over MgSO<sub>4</sub>. The solvent was evaporated and the residue purified by flash chromatography to yield the title compound as a colorless oil (134 mg, 85%). <sup>1</sup>H NMR (400 MHz, CDCl<sub>3</sub>) δ 4.91 (s, 2H), 3.40 (s, 3H), 3.20 (s, 3H), 2.97 (s, 3H), 2.06 – 1.95 (m, 2H), 1.71 (m, 4H), 1.61 – 1.48 (m, 3H), 1.30 (m, 1H). <sup>13</sup>C NMR (101 MHz, CDCl<sub>3</sub>) δ 154.2, 93.1, 92.1, 79.3, 74.6, 56.0, 38.4, 38.0, 34.2, 25.2, 22.9.

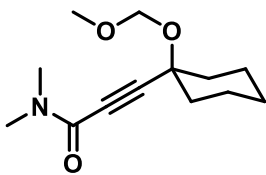



IR (film)  $\tilde{\nu}$  2933, 2859, 2229, 1633, 1392, 1146, 1020  $\text{cm}^{-1}$ . HRMS ( $\text{Cl}^+$ ) for  $\text{C}_{13}\text{H}_{21}\text{NO}_3$   $[\text{M}+\text{H}]^+$ : calcd 240.1594, found 240.1592.

## RUTHENIUM COMPLEXES

**Ruthenium Cyclobutadiene Complex 39.** To a flame dried two-necked round-bottom flask was charged with  $[\text{Cp}^*\text{RuCl}]_4$  (103 mg, 95  $\mu\text{mol}$ ). The flask was evacuated and refilled with  $\text{H}_2$  (by means of attaching a balloon filled with hydrogen via needle and septum). A solution of enyne **37** (1.00 g, 4.75 mmol) in 1,2-dichloroethane (50 mL) was introduced before the flask was immersed into a pre-heated oil bath at 70  $^\circ\text{C}$  keeping a static  $\text{H}_2$  atmosphere (ambient pressure,  $\text{H}_2$  filled balloon). After stirring for 3 h at 70  $^\circ\text{C}$ , the mixture was allowed to cool to room temperature and the solvent was removed under reduced pressure. The crude product was purified by flash chromatography (silica, hexanes/EtOAc 10:0 – 4:1) to yield butenolide **56** (480 mg, 59%) as an off-white solid. Single crystals suitable for X-ray analysis were obtained by slowly cooling a concentrated solution in  $\text{Et}_2\text{O}$  to – 80  $^\circ\text{C}$  over the course of 24 h.

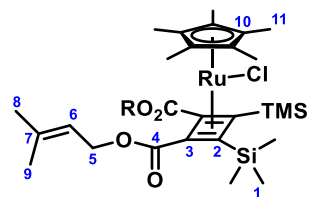

A second fraction (less polar than the butenolide) contained the title complex which was obtained as a brown solid (95.5 mg, 48% with regard to  $[\text{Ru}]$ ). Single crystals suitable for X-ray analysis were obtained by slow evaporation of a concentrated solution in  $\text{CH}_2\text{Cl}_2$ .  $^1\text{H}$  NMR (400 MHz,  $\text{CDCl}_3$ )  $\delta$  5.40 (tdq,  $J = 7.4, 2.9, 1.4$  Hz, 2H), 4.65 (dt,  $J = 7.4, 0.8$  Hz, 4H), 1.76 (m, 6H), 1.71 (m, 6H), 1.61 (s, 15H), 0.11 (s, 18H).  $^{13}\text{C}$  NMR (101 MHz,  $\text{CDCl}_3$ )  $\delta$  165.2, 139.5, 118.3, 101.9, 86.0, 81.3, 61.8, 25.9, 18.2, 9.3, 2.2.  $^{29}\text{Si}$  NMR (119 MHz,  $\text{CDCl}_3$ )  $\delta$  -4.7. IR (film)  $\tilde{\nu}$  2899, 1701, 1471, 1377, 1170, 1084  $\text{cm}^{-1}$ . HRMS ( $\text{ESI}^+$ ) for  $\text{C}_{32}\text{H}_{51}\text{ClO}_4\text{RuSi}_2$   $[\text{M}+\text{Na}]^+$ : calcd 715.1950, found 715.1958.

**Table S6:** NMR analysis of Cyclobutadiene Complex **39** ( $\text{CDCl}_3$ , 400 MHz)

| Atom [#] | $\delta$ [ppm] | J [Hz] | COSY     | HMBC |         |
|----------|----------------|--------|----------|------|---------|
| C        |                |        |          |      |         |
| H        |                |        |          |      |         |
| 1        | 2.2            |        |          |      |         |
| 1        |                | 0.11   |          | 2    |         |
| 2        | 86.0           |        |          | 1    |         |
| 3        | 81.3           |        |          |      |         |
| 4        | 165.2          |        |          | 5    |         |
| 5        | 61.8           |        |          |      |         |
| 5        |                | 4.65   | 7.4      | 5    | 4, 6, 7 |
| 6        | 118.3          |        |          |      | 5, 8, 9 |
| 6        |                | 5.40   | 7.4, 1.4 | 6    | 8, 9    |
| 7        | 139.5          |        |          |      | 5, 8, 9 |
| 8        | 25.9           |        |          |      | 6, 9    |
| 8        |                | 1.76   | 1.4      |      | 6, 7, 9 |
| 9        | 18.2           |        |          |      | 6, 8    |
| 9        |                | 1.71   | 1.4      |      | 6, 7, 8 |
| 10       | 101.9          |        |          |      | 11      |
| 11       | 9.3            |        |          |      |         |
| 11       |                | 1.61   |          |      | 10      |

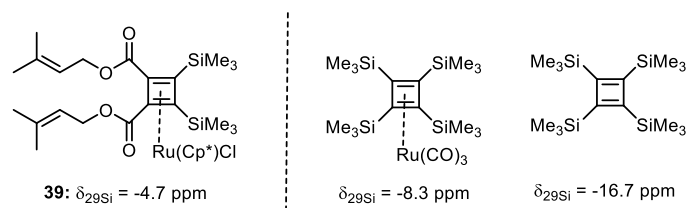

**Scheme S4.** Comparison of the  $^{29}\text{Si}$  NMR shift of the new complex **39** which features notably short  $[\text{Ru}-\text{Cl}] \cdots \text{Si}$  contacts in the solid state (see Figure 1 in the main text of the publication) with that of a related ruthenium complex reported in the literature devoid of such an interaction and the respective ligand.<sup>27,28</sup>

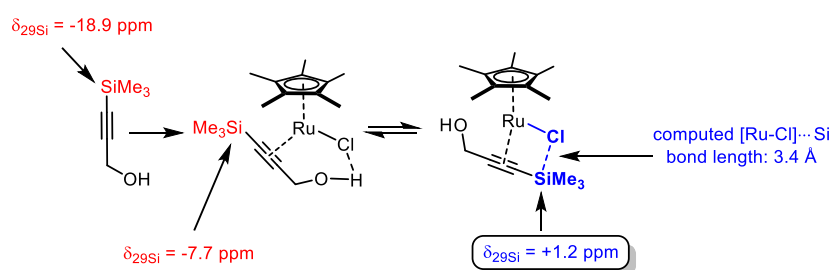

**Scheme S5.** Literature precedent for an  $^{29}\text{Si}$  NMR shift responsive to attractive  $[\text{Ru}-\text{Cl}] \cdots \text{Si}$  contacts.<sup>29</sup>

## RUTHENIUM CARBENE/OLEFIN COMPLEX

**1-Methoxy-1-(6-methylhept-5-en-1-yn-1-yl)cyclohexane (40).** *n*-BuLi (1.6 M in hexanes, 3.54 mL, 5.66

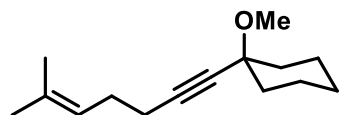

mmol) was slowly added to a solution of alkyne **S1** (652 mg, 4.72 mmol) in

THF (16 mL) at 0 °C. The mixture was stirred for 30 min at 0 °C before a solution of 5-bromo-2-methyl-2-pentene (1.00 g, 6.13 mmol) in THF (10.7 mL) and DMPU (2.9 mL) was added. The mixture was warmed to room temperature and stirring was continued for 18 h. sat. aq.  $\text{NH}_4\text{Cl}$  solution (5 mL), methyl *tert*-butyl ether (20 mL) and water (5 mL) were introduced and the layers were separated. The aqueous phase was extracted with methyl *tert*-butyl ether (3 x 100 mL) and the combined organic layers were washed with brine and dried over  $\text{MgSO}_4$ . The solvent was removed and the residue was purified by flash chromatography (silica, hexanes/EtOAc 1:0 – 40:1) to give the title compound as a colorless oil (401 mg, 39%).  $^1\text{H}$  NMR (400 MHz,  $\text{CDCl}_3$ )  $\delta$  5.17 (m, 1H), 3.34 (s, 3H), 2.29 – 2.16 (m, 4H), 1.90 – 1.81 (m, 2H), 1.70 (q,  $J = 1.3$  Hz, 3H), 1.68 – 1.59 (m, 2H), 1.63 (d,  $J = 1.3$  Hz, 4H), 1.57 – 1.45 (m, 4H), 1.31 – 1.23 (m, 1H).  $^{13}\text{C}$  NMR (101 MHz,  $\text{CDCl}_3$ )  $\delta$  132.9, 123.2, 86.5, 81.2, 74.2, 50.6, 37.2, 27.9, 25.9, 25.7, 23.0, 19.4, 18.0. IR (film)  $\tilde{\nu}$  2932, 2856, 1447, 1093  $\text{cm}^{-1}$ . HRMS (ESI<sup>+</sup>) for  $\text{C}_{15}\text{H}_{24}\text{O}$   $[\text{M}+\text{Na}]^+$ : calcd 243.1719, found 243.1721.

**Ruthenium Carbene Complex 41.**  $[\text{Cp}^*\text{RuCl}]_4$  (123 mg, 0.11 mmol) was added to a stirred solution of enyne **40** (100 mg, 0.45 mmol) in  $\text{CH}_2\text{Cl}_2$  (10.0 mL) in a flame dried Schlenk tube at room temperature under argon.

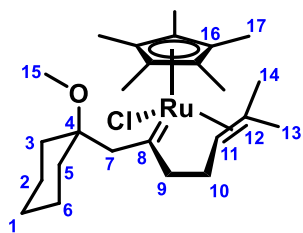

H<sub>2</sub> was bubbled through the mixture for 2 min before the mixture was stirred for 1.5 h at room temperature under an hydrogen atmosphere (balloon). The solvent was removed by purging the mixture with argon and subsequent evacuation of the tube. The residue was washed with pentane (3.5 mL) by means of cannula filtration. Crystals suitable for X-ray analysis were obtained by extracting the residue with Et<sub>2</sub>O (2 mL) followed by slow cooling of the filtrate to – 50 °C over the course of 48 h. <sup>1</sup>H NMR: see Table S7; <sup>13</sup>C NMR: see Table S7; IR (film)  $\tilde{\nu}$  2927, 2851, 1442, 1375, 1164, 1069 cm<sup>-1</sup>. HRMS (ESI<sup>+</sup>) for C<sub>25</sub>H<sub>41</sub>ClORu [M]<sup>+</sup>: calcd 494.1884, found 494.1893.

**Table S7:** NMR analysis of Carbene Complex **41** (CD<sub>2</sub>Cl<sub>2</sub>, –20 °C, 400/101 MHz)

| Atom [#]   | $\delta$ [ppm] | J [Hz]         | COSY             | HMBC             | NOESY           |
|------------|----------------|----------------|------------------|------------------|-----------------|
| <b>C</b>   | <b>H</b>       |                |                  |                  |                 |
| <b>1</b>   | 25.7           |                |                  |                  |                 |
| <b>1</b>   | 1.40 - 1.21    |                |                  |                  |                 |
| <b>2</b>   | 21.8, 21.6     |                |                  |                  |                 |
| <b>2</b>   | 1.40 - 1.21    |                |                  |                  |                 |
| <b>3</b>   | 35.6           |                |                  | 7b               |                 |
| <b>3</b>   | 1.30           |                |                  |                  |                 |
| <b>4</b>   | 76.6           |                |                  | 7b, 15           |                 |
| <b>5</b>   | 34.4           |                |                  | 7a               |                 |
| <b>5</b>   | 1.81, 1.19     |                |                  |                  |                 |
| <b>6</b>   | 21.8, 21.6     |                |                  |                  |                 |
| <b>6</b>   | 1.40 - 1.21    |                |                  |                  |                 |
| <b>7</b>   | 65.9           |                |                  |                  |                 |
| <b>7a</b>  | 4.29           | 17.1           | 7b               | 5, 9             | 7b, 15, 17      |
| <b>7b</b>  | 2.13           | 17.1           | 7a               | 3, 4             | 7a              |
| <b>8</b>   | 368.4          |                |                  | 7a, 7b, 9a, 9b   |                 |
| <b>9</b>   | 67.3           |                |                  | 7a, 10a, 11      |                 |
| <b>9a</b>  | 3.08           | 23.9, 9.1, 5.6 | 9b, 10a, 10b     |                  | 9b, 13          |
| <b>9b</b>  | 2.20           |                | 9a, 10a, 10b     |                  | 9a              |
| <b>10</b>  | 25.9           |                |                  |                  |                 |
| <b>10a</b> | 2.45           |                | 9a, 9b, 10b, 11  | 9, 11            | 10b, 11, 17     |
| <b>10b</b> | 2.17           |                | 9a, 9b, 10a, 11  | 11               | 10a             |
| <b>11</b>  | 79.7           |                |                  | 10a, 10b, 13, 14 |                 |
| <b>11</b>  | 4.42           | 8.0, 1.9       | 10a, 10b, 13, 14 | 9, 12            | 10a, 14, 17     |
| <b>12</b>  | 79.4           |                |                  | 11               |                 |
| <b>13</b>  | 25.0           |                |                  | 14               |                 |
| <b>13</b>  | 1.29           |                |                  | 11, 14           | 9a              |
| <b>14</b>  | 27.8           |                |                  | 13               |                 |
| <b>14</b>  | 1.22           |                |                  | 11, 13           | 11, 17          |
| <b>15</b>  | 48.5           |                |                  |                  |                 |
| <b>15</b>  | 3.00           |                |                  | 4                | 7a              |
| <b>16</b>  | 99.7           |                |                  | 17               |                 |
| <b>17</b>  | 10.1           |                |                  |                  |                 |
| <b>17</b>  | 1.55           |                |                  | 16               | 7a, 10a, 11, 14 |

### Decomposition of Carbene Complex **41**

Complex **41** slowly decomposes into isomeric alkene **B** when left in  $\text{CD}_2\text{Cl}_2$  solution under Ar at room temperature (approx. 70 % (GC) after 7 days). The structure of the product was established by deconvolution of the diagnostic olefin signals (8 and 9) in  $\text{C}_6\text{D}_6$  showing characteristic  $^3\text{J}(\text{H}-\text{H})$ -couplings ( $^3\text{J}(\text{H}9-\text{H}10) = 6.2 \text{ Hz}$ ,  $^3\text{J}(\text{H}8-\text{H}7) = 6.8 \text{ Hz}$ ) to the neighboring methylene groups.

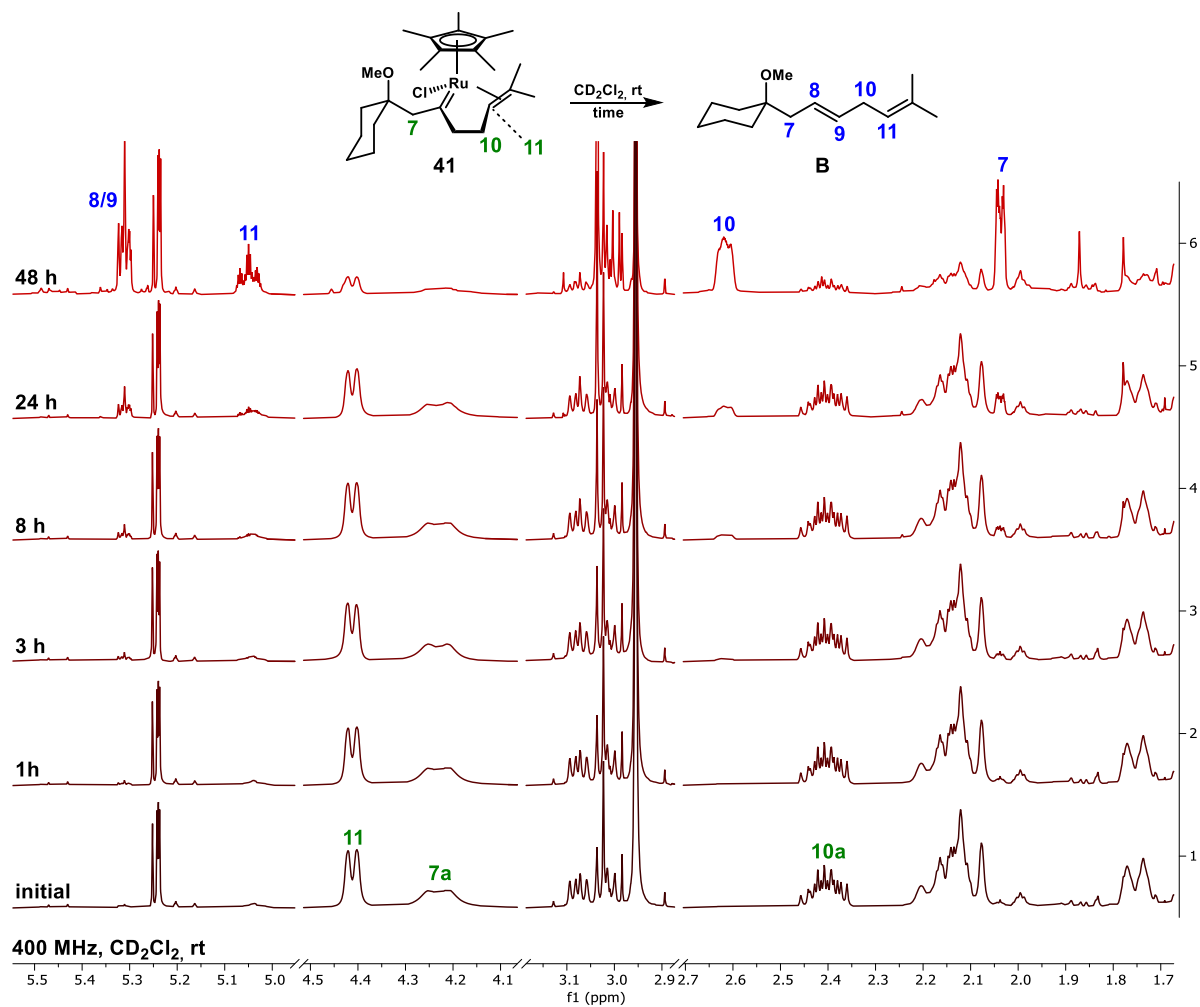

**Figure S14.** Evolution of Complex **41** in  $\text{CD}_2\text{Cl}_2$  solution at room temperature over time (selected regions of the stacked spectra).

PEV-PA-395-40

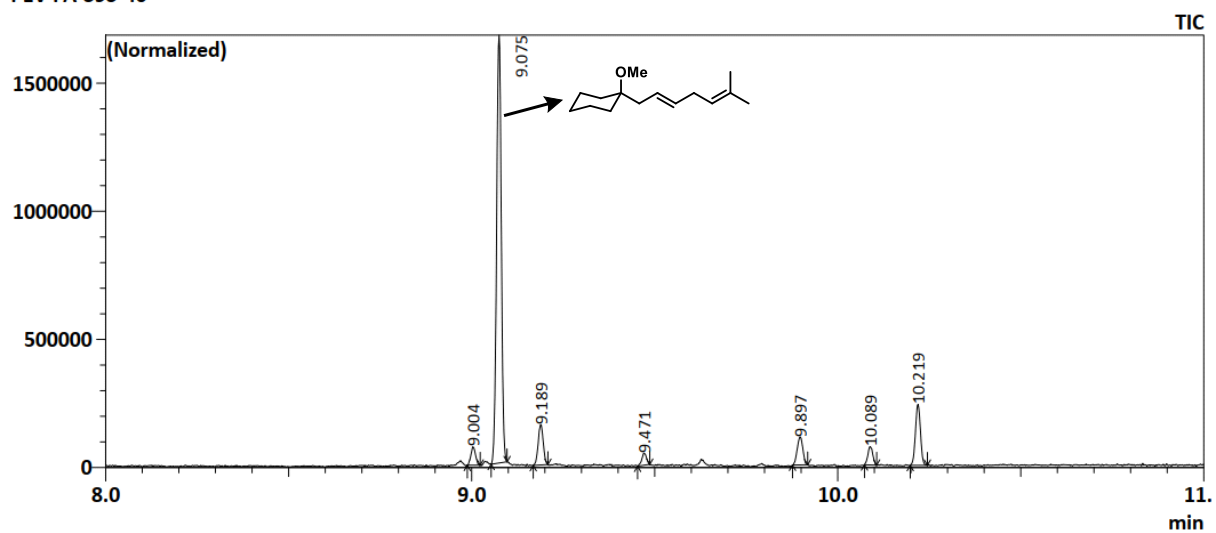

Sample Information  
 Fri 12.07.2019 - 08:57:10

PEV-PA-395-40

C:\GCMSsolution\Data\Methode\50\_20.qgm  
 C:\GCMSsolution\Data\User\Peil\PEV-PA-395-40.qgd

Peak Report

| Peak | Time  | %     |
|------|-------|-------|
| 1    | 9.00  | 2.9   |
| 2    | 9.07  | 69.0  |
| 3    | 9.19  | 7.1   |
| 4    | 9.47  | 2.0   |
| 5    | 9.90  | 5.4   |
| 6    | 10.09 | 3.1   |
| 7    | 10.22 | 10.5  |
|      |       | 100.0 |

**Figure S15.** GCMS analysis of the reaction mixture after 7 days at room temperature showing the quite selective formation of **B** (approx. 70% TIC ratio of volatile material).

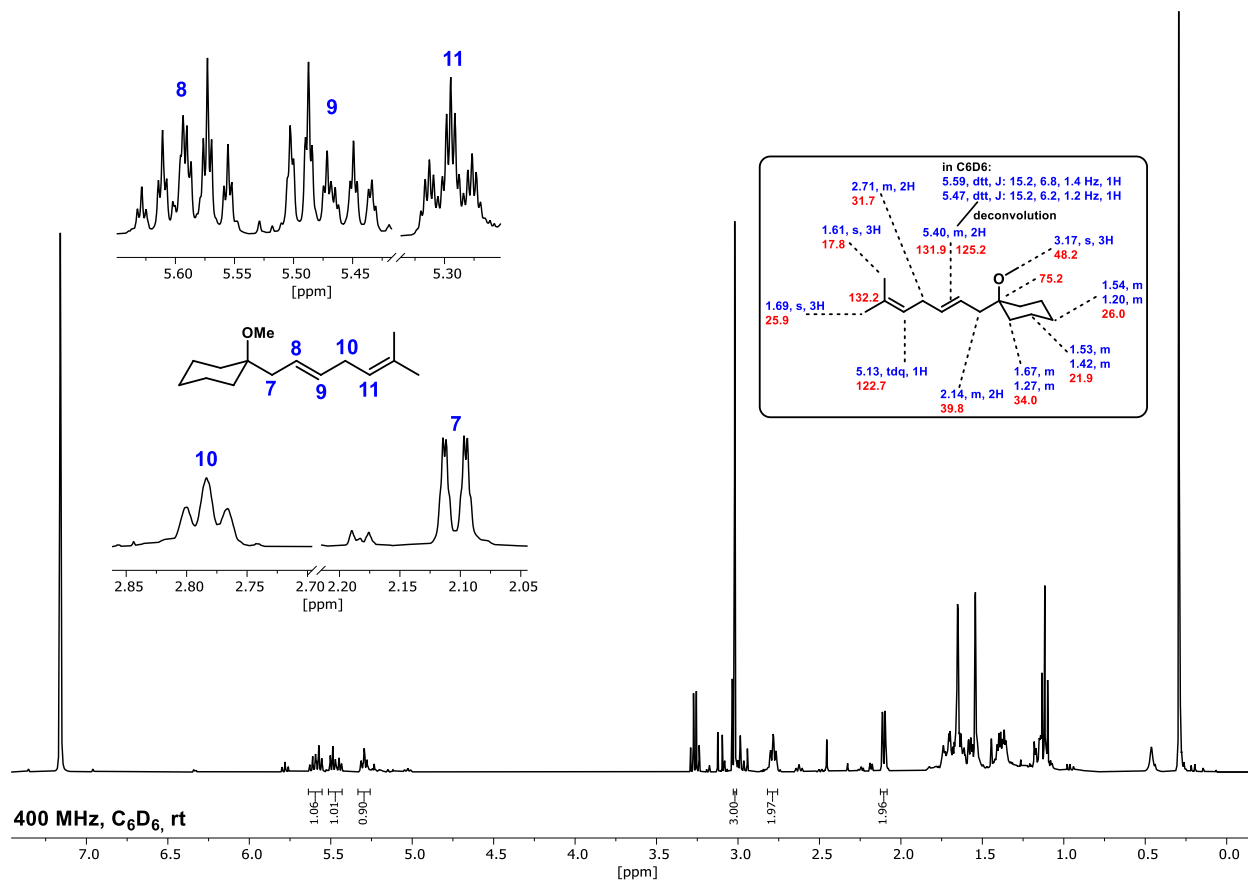

**Figure S16.** Diagnostic  $^1\text{H}$ -spectrum ( $\text{C}_6\text{D}_6$ ) of the decomposition mixture and chemical shift assignments based on 2D spectra (insert).

## BRIDGED CARBENOID COMPLEX 43

**A. Variable-temperature NMR Control of the Stoichiometric Reaction of Enyne 1a with  $[\text{Cp}^*\text{RuCl}]_4$  under  $\text{H}_2$ .**  $[\text{Cp}^*\text{RuCl}]_4$  (16.1 mg, 0.015 mmol) was added to a stirred solution of enyne **1a** (13.9 mg, 0.059 mmol) in  $\text{CD}_2\text{Cl}_2$  (0.7 mL) under argon in a flame-dried Schlenk tube. The mixture was transferred into a flame-dried J-Young-NMR tube under argon before it was cooled to  $-78^\circ\text{C}$  (dry ice/acetone bath). The atmosphere was exchanged for  $\text{H}_2$  by purging the system with a  $\text{H}_2$  for 2 min and the NMR tube was quickly closed under a  $\text{H}_2$  current. The NMR tube was shaken before being introduced into the NMR spectrometer, the internal temperature of which had been set to  $-50^\circ\text{C}$ .  $^1\text{H}$  NMR spectra were recorded at temperatures from  $-50^\circ\text{C}$  to room temperature in  $10^\circ\text{C}$  intervals (series of  $^1\text{H}$  excerpts see Figure S17).

**Figures S17 and S18:** The formation of the metathesis product **2a** starts at  $-30^\circ\text{C}$  (signals **C + D**) with steady increase upon raising the temperature in increments of  $10^\circ\text{C}$ . An additional signal (**E**) appears in parallel, which was attributed to the bridged carbenoid **43**. Conversion was incomplete even at room temperature, likely because of insufficient  $\text{H}_2$  in solution and slow transfer from the gas phase.

**B. Room Temperature NMR Spectra of a Stoichiometric Reaction of Enyne 1a with [Cp\*RuCl]<sub>4</sub> under H<sub>2</sub>.** [Cp\*RuCl]<sub>4</sub> (15.3 mg, 0.014 mmol) was added to a stirred solution of enyne 1a (14.5 mg, 0.062 mmol) in CD<sub>2</sub>Cl<sub>2</sub> (0.7 mL) under argon in a flame dried Schlenk tube at room temperature. H<sub>2</sub> was bubbled gently through the mixture for 2 min and stirring was continued for 30 min under a H<sub>2</sub> atmosphere. The mixture was transferred into a flame dried J-Young-NMR tube under argon for analysis.

**Figures S19-S22:** The spectra show complete conversion of enyne 1a (signals A + B missing) to product 2a (signals C + D). Significant quantities of the bridged carbenoid 43 are detected (approx. 15% by comparison of signals D and E). <sup>13</sup>C NMR, HSQC and HMBC spectra were recorded to characterize the carbenoid species; the data is summarized in Tab. S8.

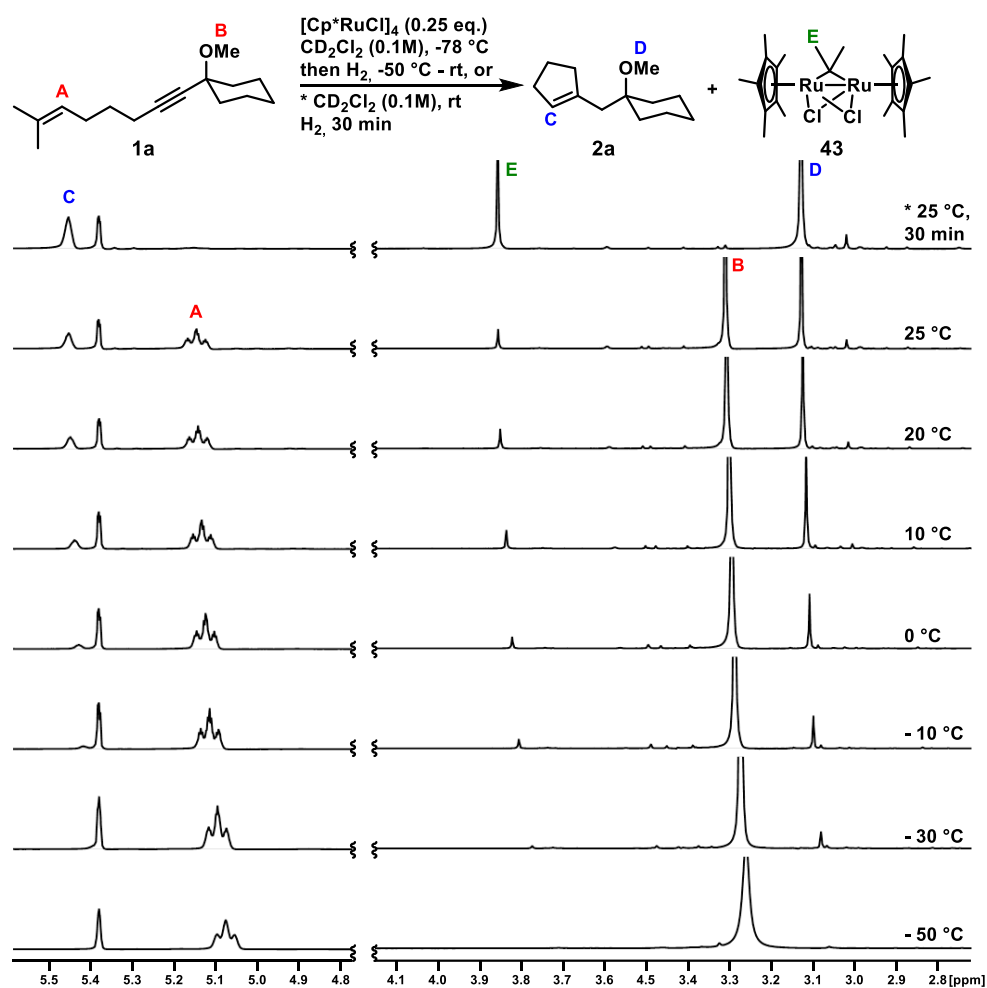

**Figure S17.** Low and room temperature stoichiometric NMR experiments. Shown is the relevant region in the <sup>1</sup>H spectra recorded at the specified temperatures (complete spectra see Figure S18). Excerpt 1 (top) refers to experiment B, excerpts 2 – 8 refer to experiment A.

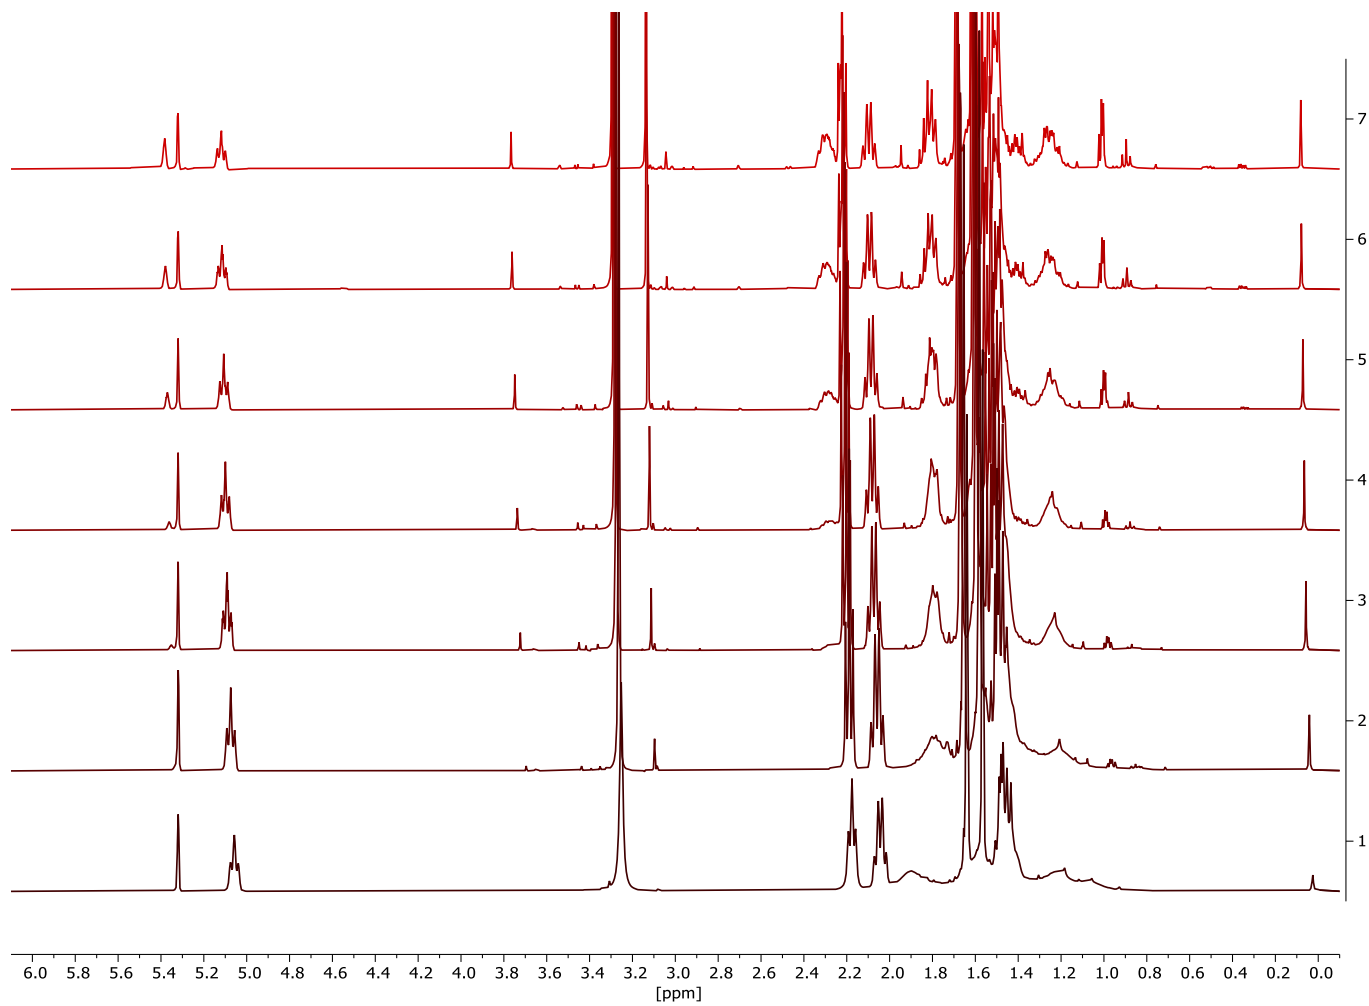

**Figure S18.**  $^1\text{H}$  NMR spectra of low temperature stoichiometric NMR experiment **A**. Spectra are stacked according to Figure S17 (lane 1 @  $-50\text{ }^\circ\text{C}$  to lane 7 @  $25\text{ }^\circ\text{C}$ )



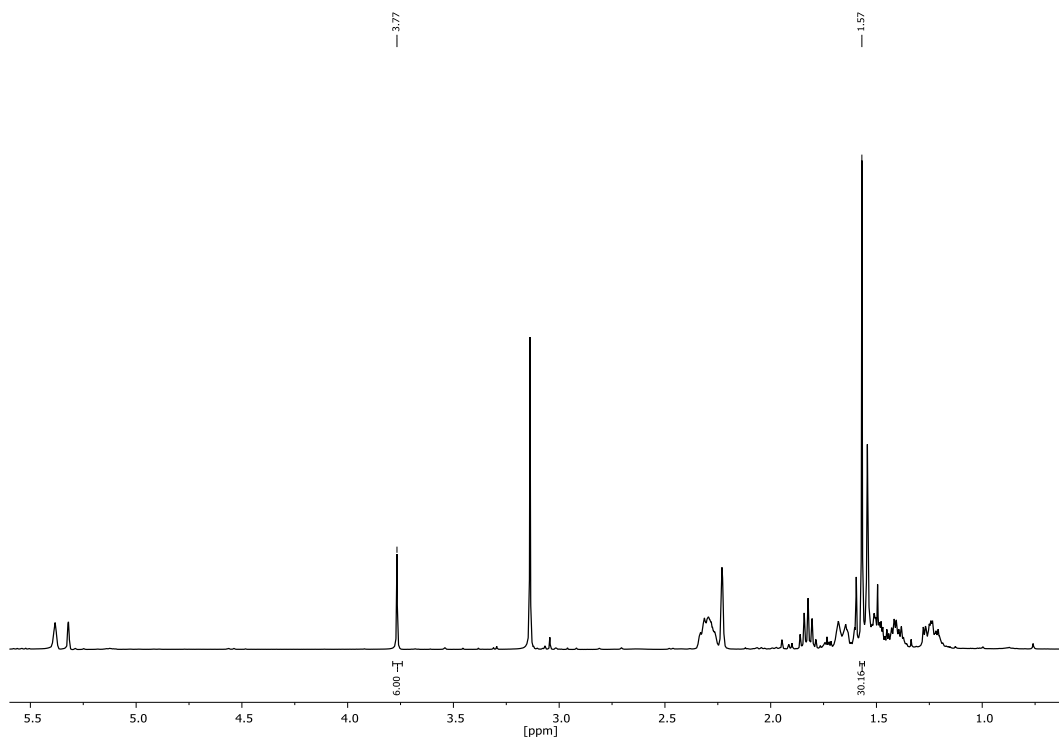

**Figure S19.**  $^1\text{H}$  NMR spectrum stoichiometric experiment **B** performed at room temperature; peak-picking and integrals shown for signals attributed to carbenoid **43**.

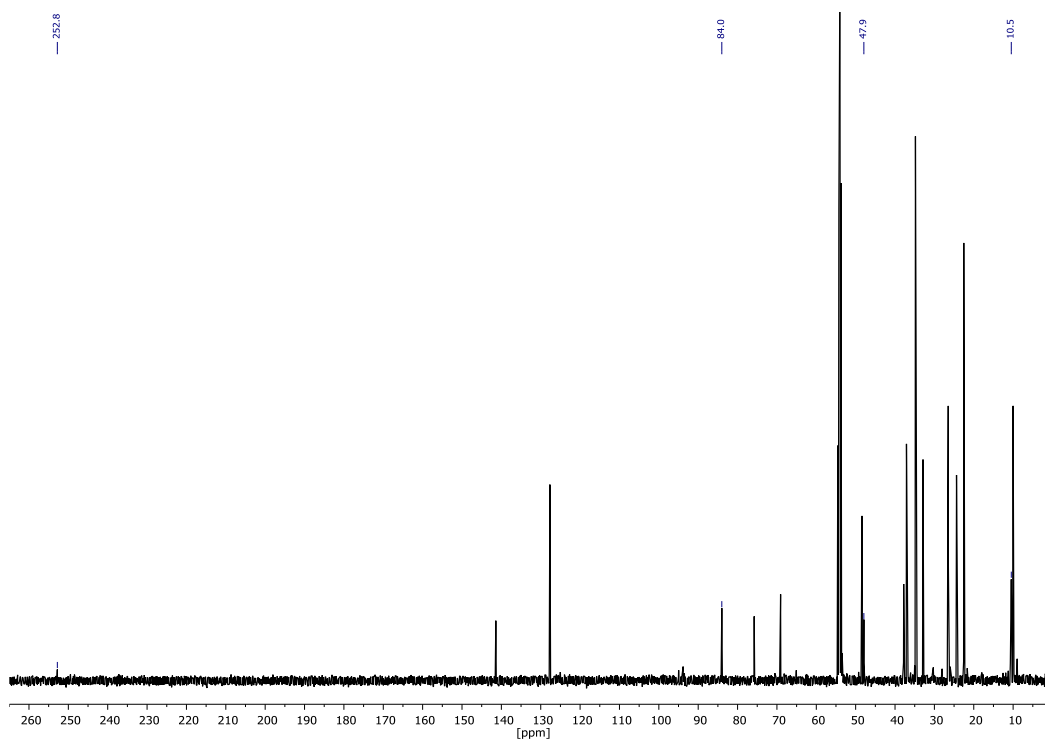

**Figure S20.**  $^{13}\text{C}$  NMR spectrum of the stoichiometric NMR experiment **B** performed at room temperature; peak-picking shown for signals attributed to carbenoid **43**.

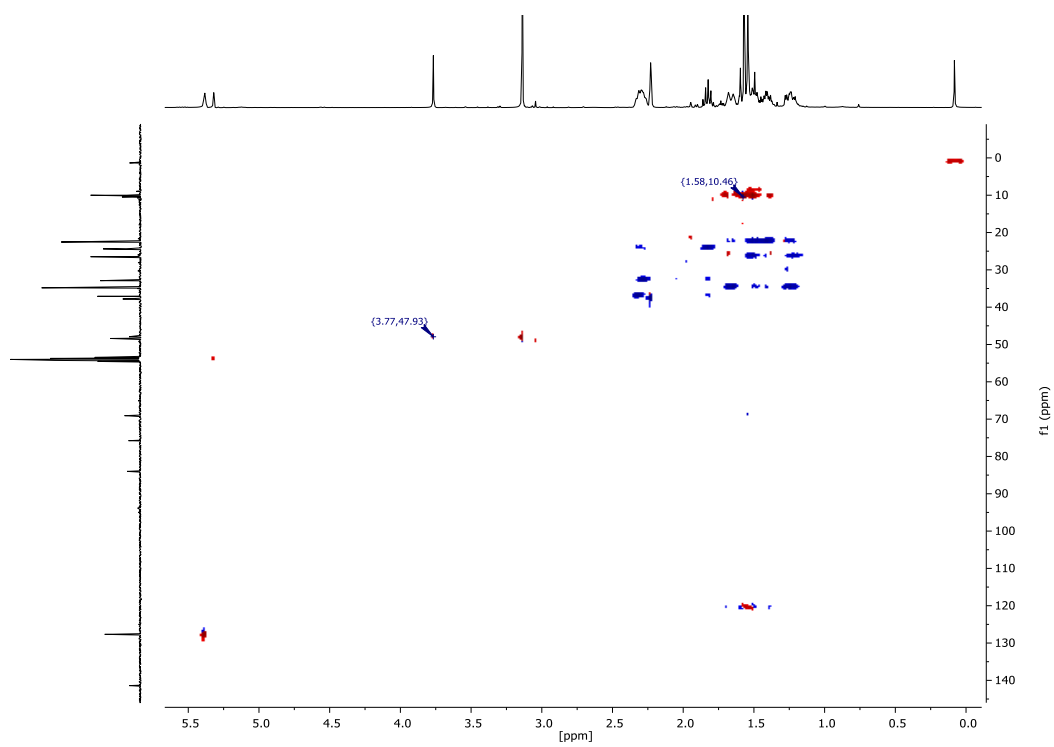

Figure S21. HSQC spectrum of experiment **B**, cross-peaks for carbenoid **43** are indicated

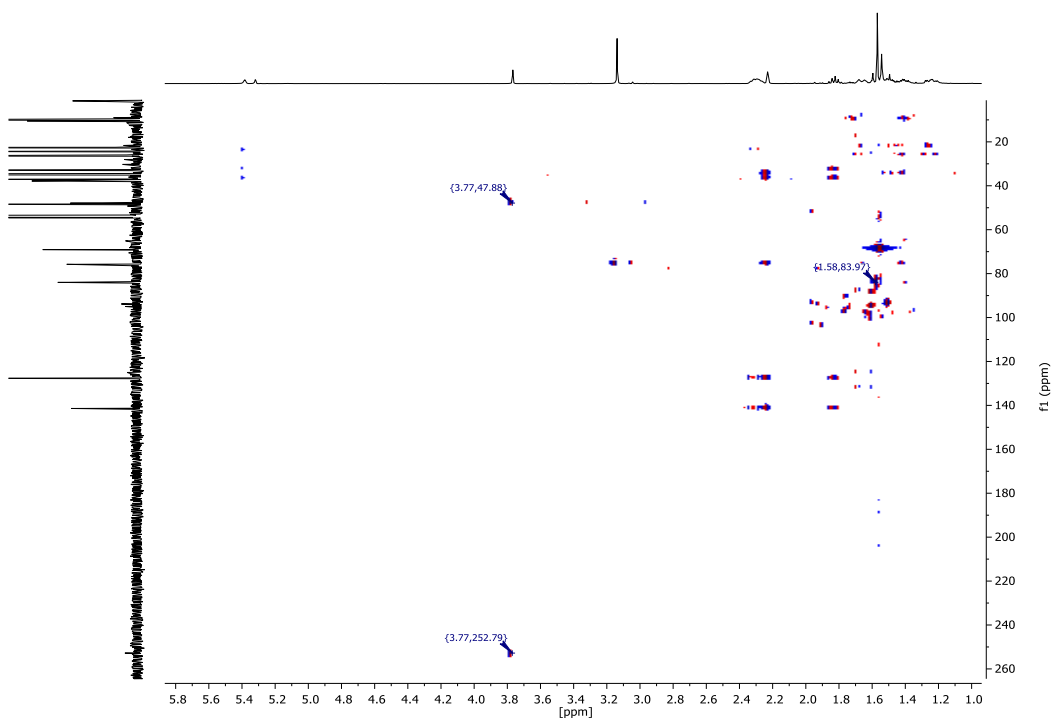

Figure S22. HMBC spectrum of experiment **B**, cross-peaks for carbenoid **43** are indicated

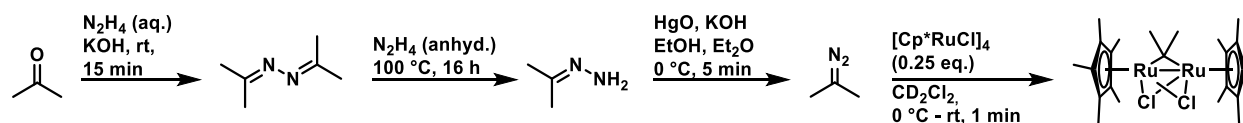

**Figure S23.** Synthesis of bridged carbenoid **43** from 2-diazopropane.

**Independent Synthesis.** 2-Diazopropane (0.2 M in Et<sub>2</sub>O, 92  $\mu$ L, 0.02 mmol)<sup>[30][31]</sup> was added dropwise to a stirred solution of [Cp\*RuCl]<sub>4</sub> (10 mg, 0.01 mmol) in CH<sub>2</sub>Cl<sub>2</sub> (0.4 mL) at 0 °C in a flame-dried Schlenk tube under argon. The mixture was stirred for 1 min before it was allowed to warm to room temperature. The solvent was removed by purging with argon and subsequent evacuation of the tube, and the green residue was dissolved in CD<sub>2</sub>Cl<sub>2</sub> for immediate NMR analysis.

**Figures S24-S26:** Identical sets of <sup>1</sup>H and <sup>13</sup>C resonances were found as for the in-situ generated carbenoid **43** from NMR experiment **B** (Figures S19 – S22), thus strongly supporting the structural assignment. *n*Oe data confirm the shown structure, which is also consistent with a previously reported dimeric carbenoid.<sup>[32]</sup>

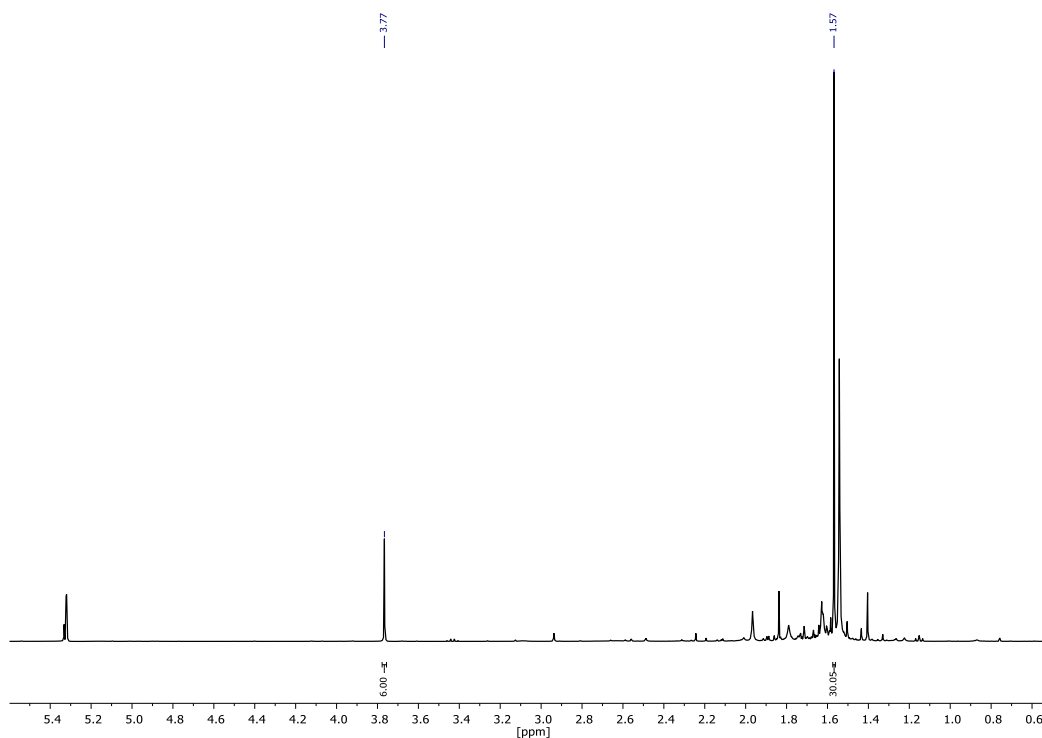

**Figure S24.** <sup>1</sup>H NMR spectrum of the crude reaction mixture comprising carbenoid **43** prepared by decomposition of 2-diazopropane

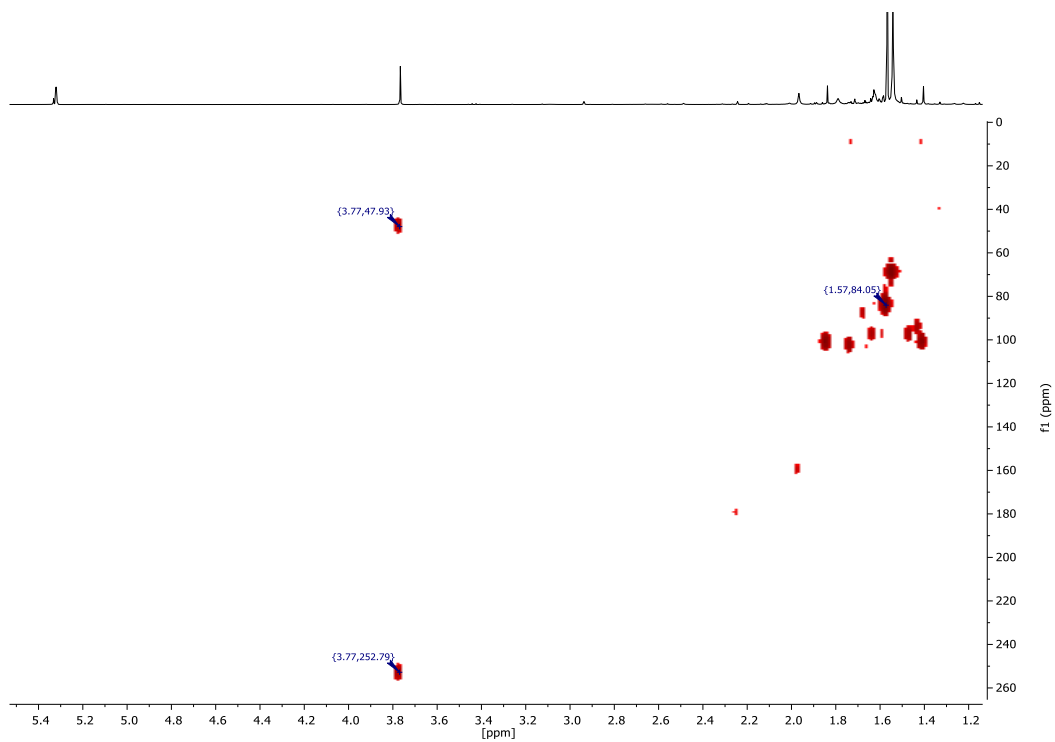

Figure S25. HMBC spectrum of carbenoid **43** generated from diazopropane

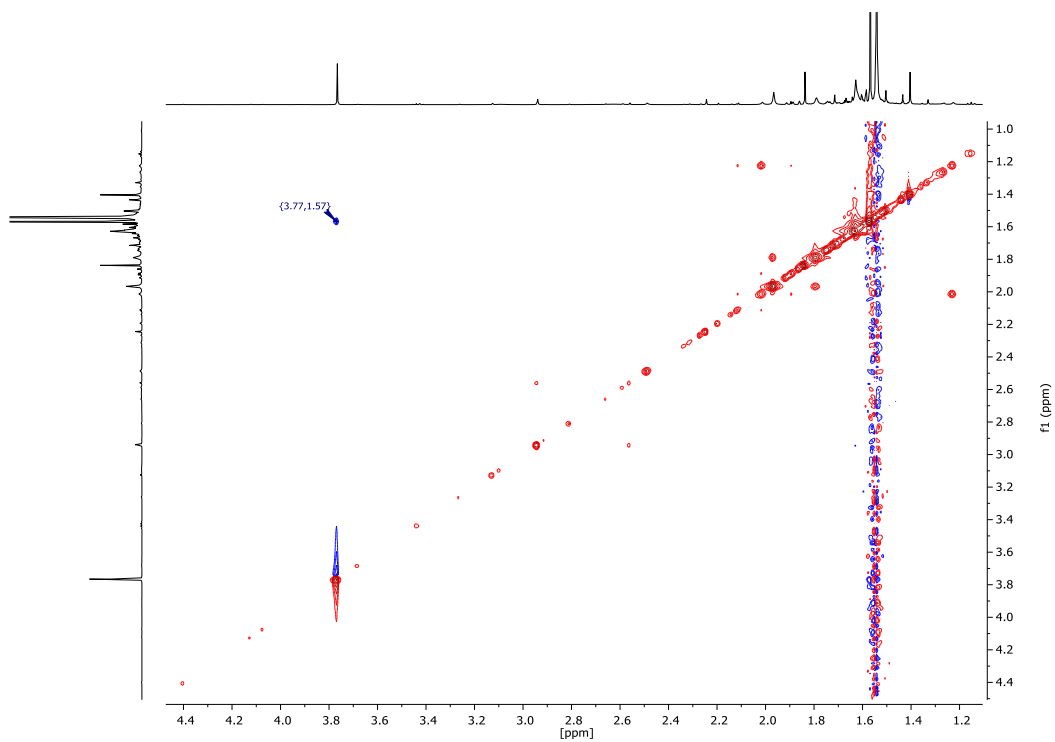

Figure S26. NOESY spectrum of of carbenoid **43** generated from diazopropane

**Table S8:** Detailed NMR analysis of bridged carbenoid **43**

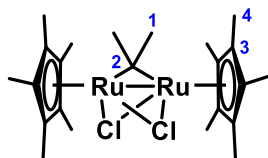

| Atom [#] | $\delta$ [ppm] | HMBC | NOESY |
|----------|----------------|------|-------|
| C        | H              |      |       |
| 1        | 47.9           |      |       |
| 1        | 3.77           | 2    | 4     |
| 2        | 252.8          | 1    |       |
| 3        | 84.0           | 4    |       |
| 4        | 10.5           |      |       |
| 4        | 1.57           | 3    | 1     |

## HEADSPACE GC ANALYSIS

The reactions were setup as described in the Experimental Section (see above). After completion of the reaction, the mixture was allowed to cool to room temperature and a needle connected to a gas tight analysis bag was pierced through the septum used to seal the Schlenk tube. The headspace gases were transferred by purging the gas contained in the Schlenk tube into the gas bag by a stream of argon (approx. 50 mL). An aliquot of the gas mixture was analyzed by GC-FID and GC-MS. Retention times and fragmentation patterns of the analytes were compared with reference samples ("Phillips 40"), which unambiguously confirmed the formation of propane/propene from enyne **1a** and of isobutane/isobutene from enyne **1c** as the starting material (Figure S27).

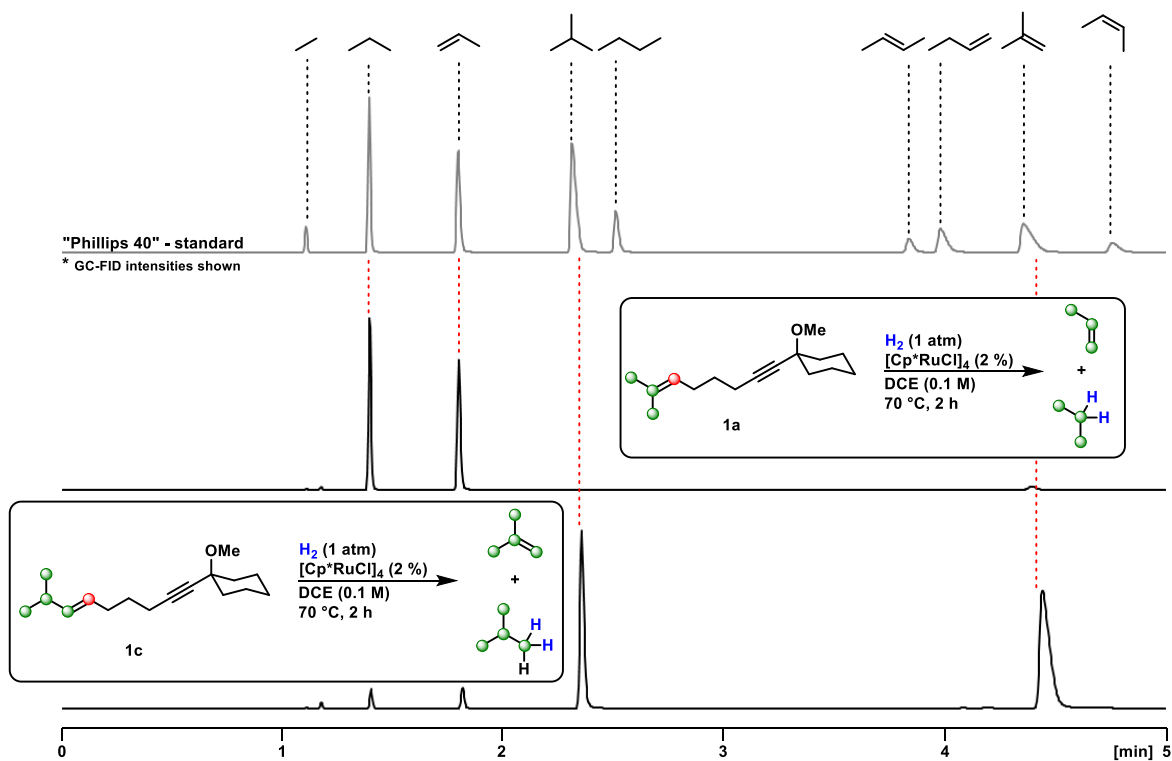

**Figure S27.** Excerpt of GC-FID traces of the headspace analytes formed in the shown reactions.

Sequence: 5030 PEV-PA VD  
Injection #2: PEV-PA-162-01

Chromatogram

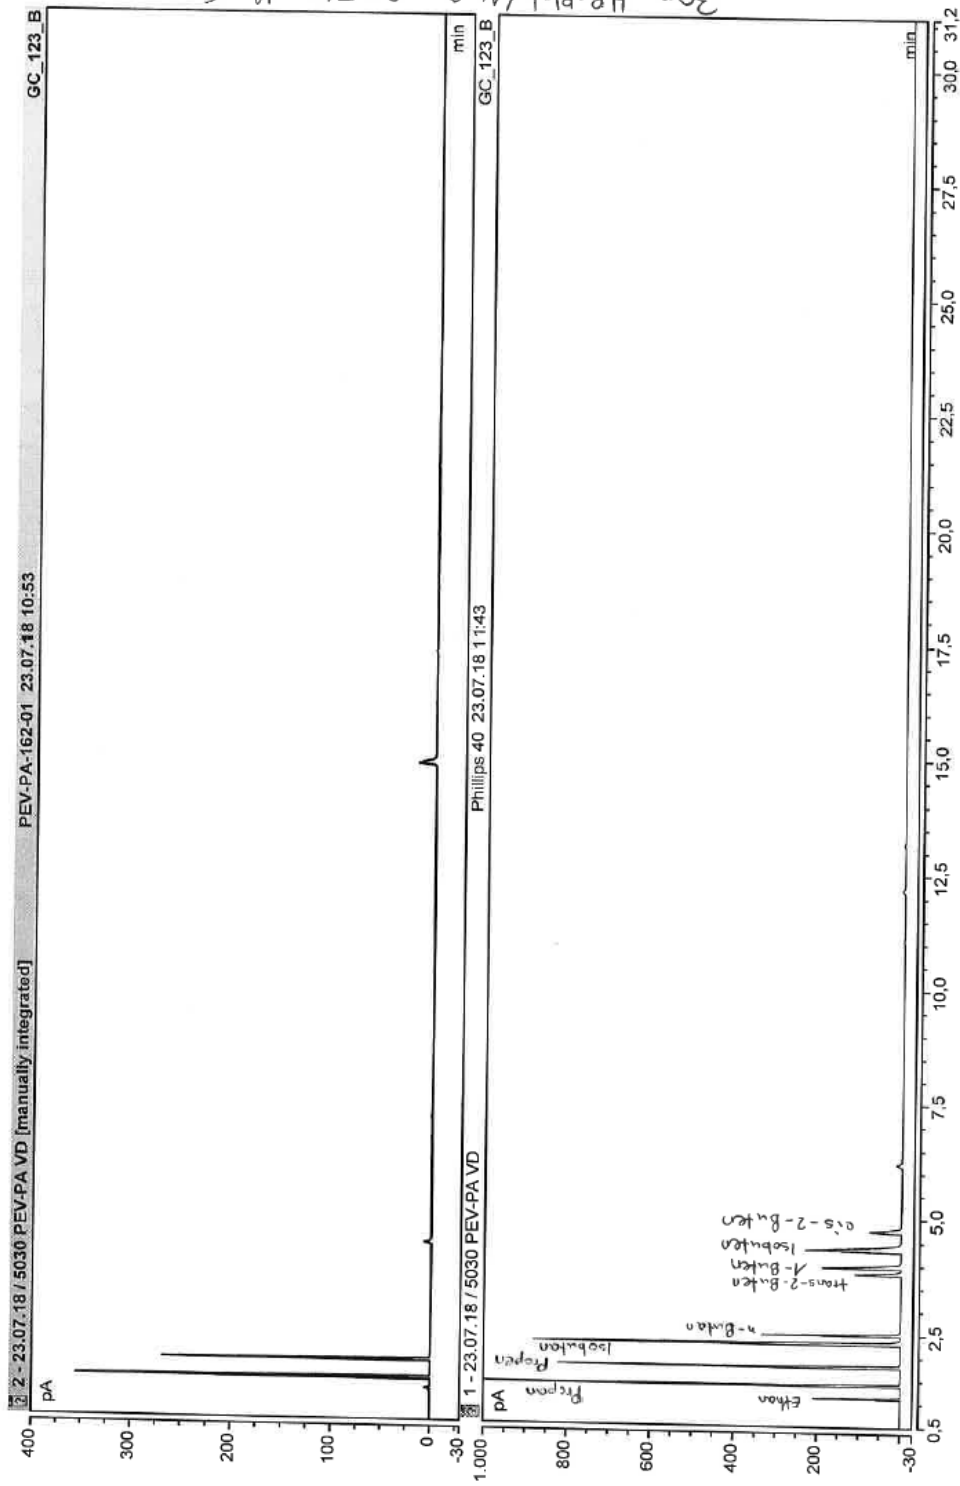

Chromleon 7  
Version 7.2.5.9717, Thermo Fisher Scientific

Page 1 of 1

V. Dick

Printed by dietl  
23.07.18 14:52

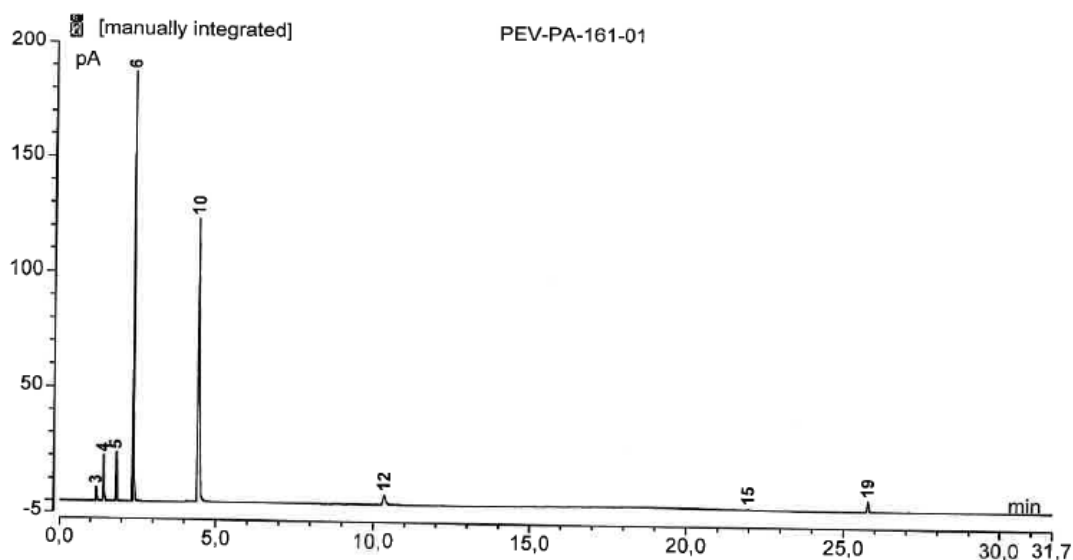

Sample: PEV-PA-161-01  
 Sequenz: 5031 PEV-PA VD  
 Sequenz date: 23.07.18

Instrument: GC\_123  
 Measured: 23.07.18 13:55  
 Processing M.: Übersicht PEV-PA  
 Report-File: Übersicht 161-01

Zuordnung mit Vergleichssubstanzen (Gasmischung Phillips 40)

| No. | Ret.Time<br>min | area-%<br>% | Peak Name |
|-----|-----------------|-------------|-----------|
| 1   | 1,04            | 0,07        |           |
| 2   | 1,12            | 0,06        |           |
| 3   | 1,19            | 0,63        |           |
| 4   | 1,41            | 2,19        | Propan    |
| 5   | 1,82            | 2,93        | Propen    |
| 6   | 2,36            | 33,46       | Isobutan  |
| 7   | 2,55            | 0,01        |           |
| 8   | 4,07            | 0,17        |           |
| 9   | 4,18            | 0,59        |           |
| 10  | 4,43            | 53,96       | Isobuten  |
| 11  | 7,30            | 0,03        |           |
| 12  | 10,35           | 3,25        |           |
| 13  | 15,14           | 0,06        |           |
| 14  | 17,55           | 0,05        |           |
| 15  | 21,97           | 0,23        |           |
| 16  | 22,09           | 0,04        |           |
| 17  | 22,37           | 0,02        |           |
| 18  | 23,30           | 0,04        |           |
| 19  | 25,77           | 2,18        |           |
| 20  | 27,08           | 0,04        |           |

Instrument parameters:

Column: 30,0 m HP-Plot/Al2O3 0,25/5,0df G/425  
 Temperature: 220/ 80, 10 min iso 6/min 180, 5 min iso/ 350  
 Gas: 0,80 bar H2  
 Sample size: 250,0 µL

V. Diel

Sequence: 5030 PEV-PA VD  
Injection #: Phillips 40

Chromatogram

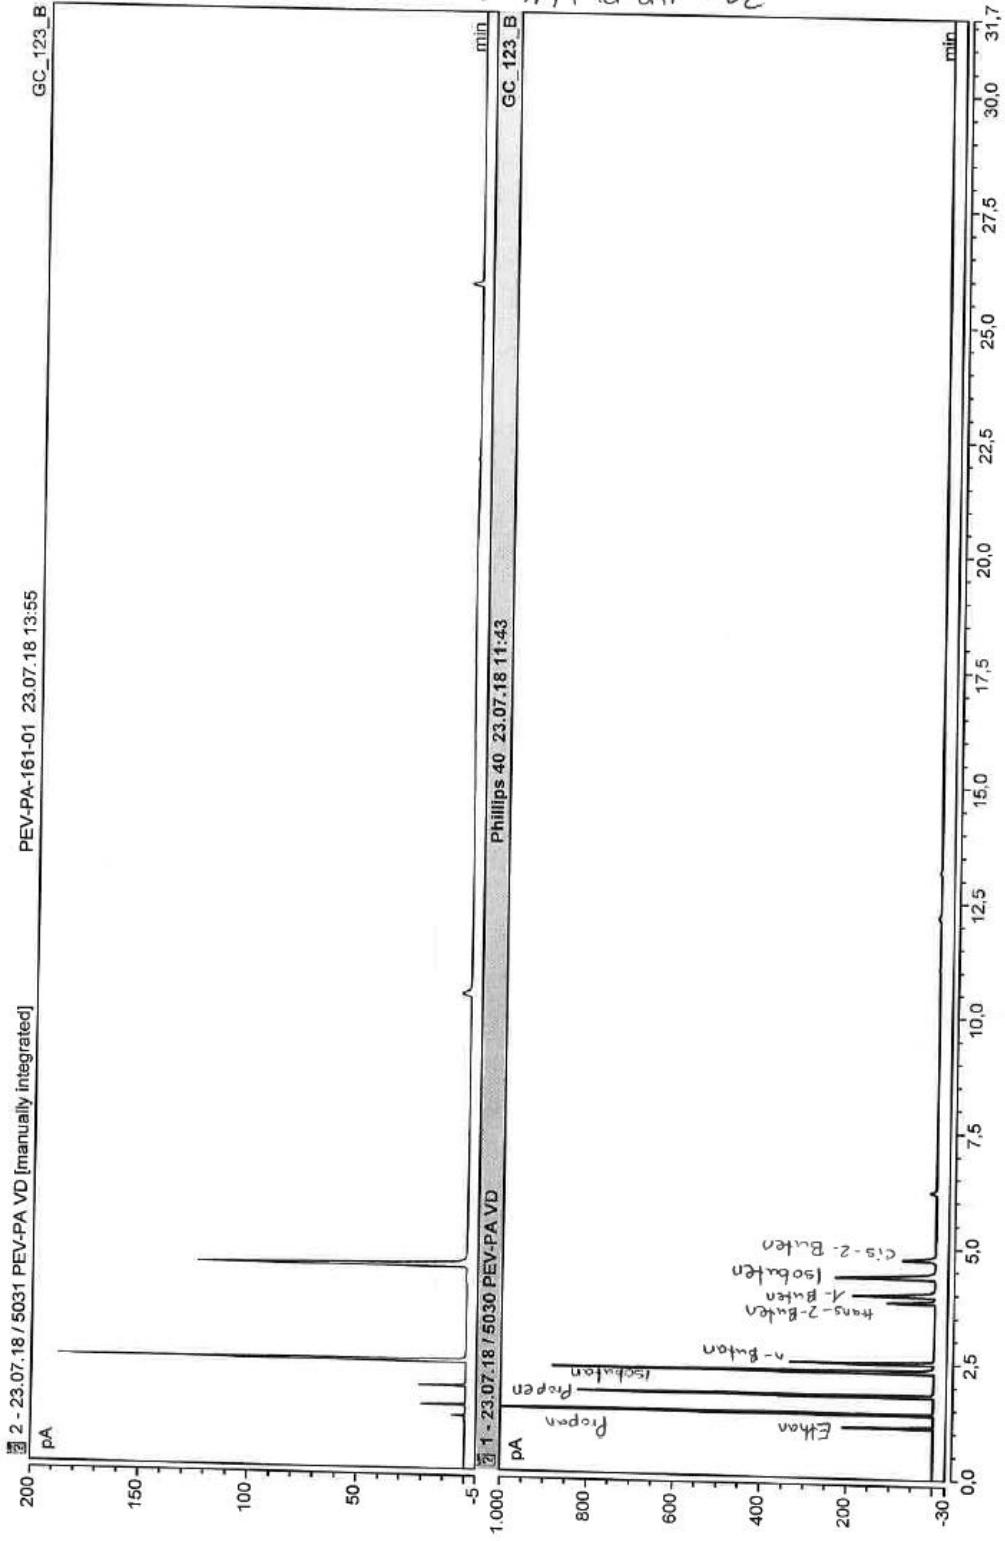

Chromleon 7.  
Version 7.2.5.9717, Thermo Fisher Scientific

Page 1 of 1

V. Diehl

Printed by diehl  
24.07.18 08:55



## ANALYSIS OF RUTHENACYCLOBUTANES A' AND D

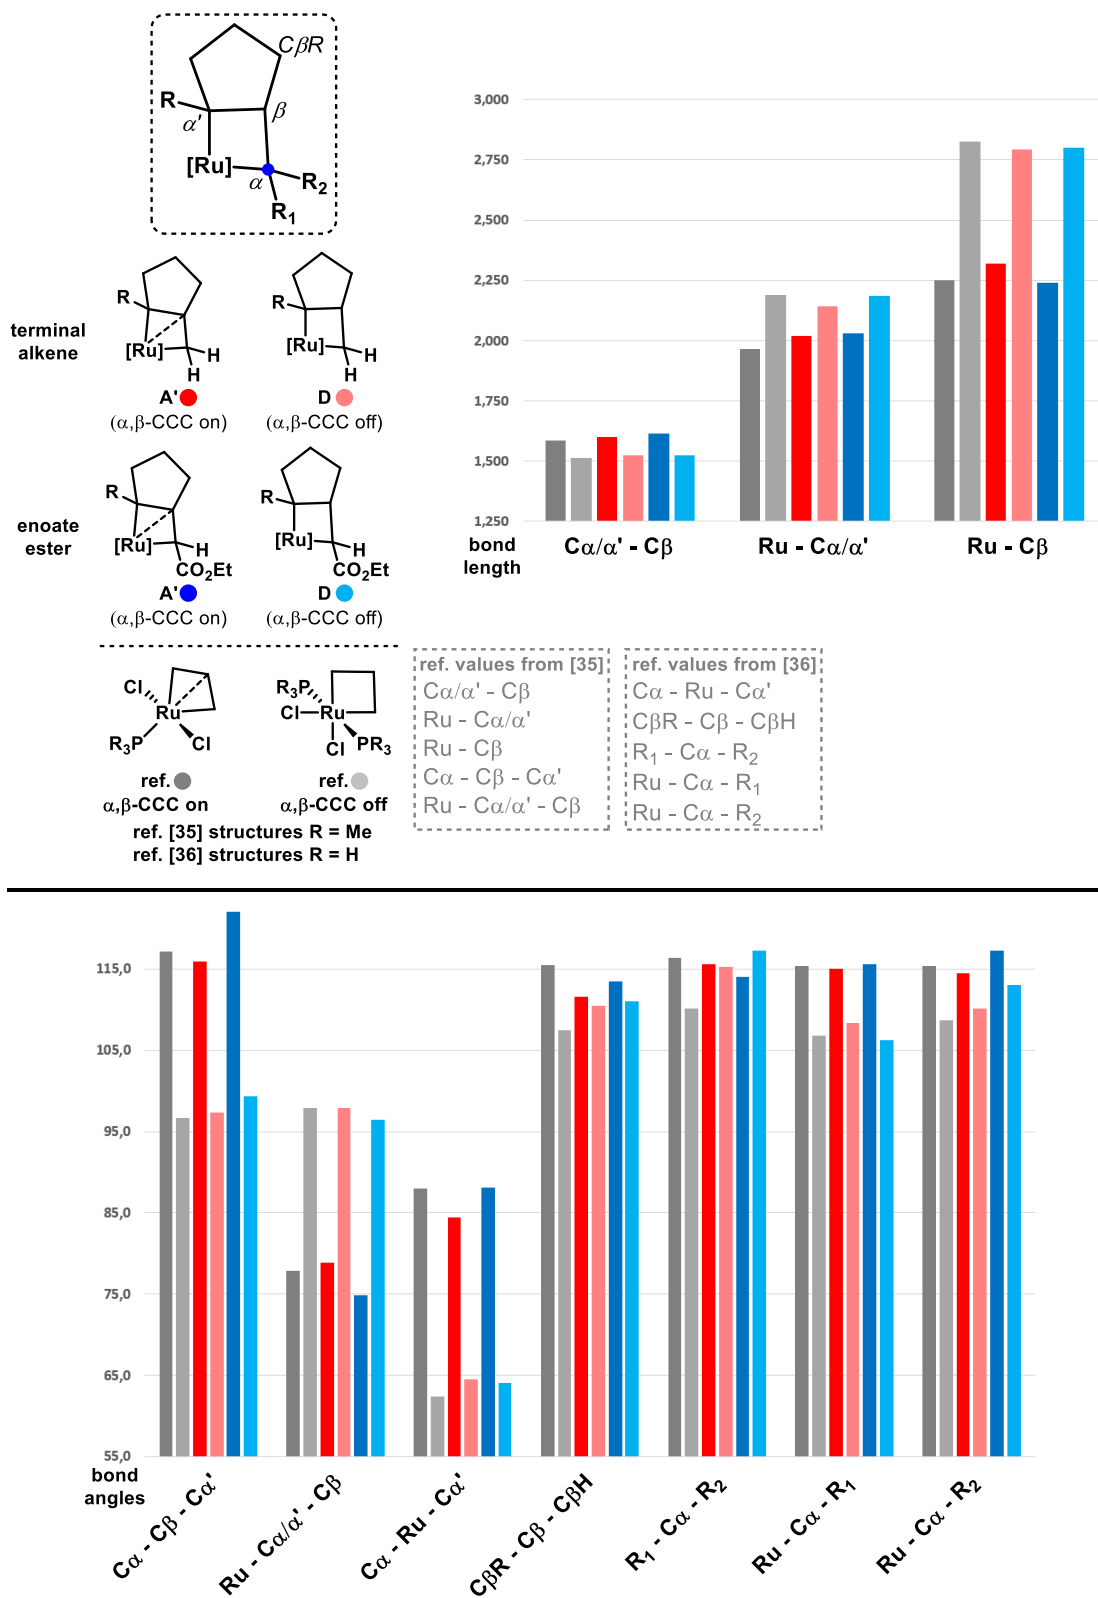

**Figure S28.** Comparison of the structural fingerprint of A' and D with reference compounds

To test the importance of the structurally different ruthenacyclobutanes (RCBs) the metric data of RCBs **A'** and **D** were compared to previously described complexes in which the agostic interaction was present or absent.<sup>[33][34]</sup> The reference structures correspond to active (“ $\alpha,\beta$ -CCC on”) and dormant (“ $\alpha,\beta$ -CCC off”) metathesis intermediates with the ligand set derived from 1<sup>st</sup> generation Grubbs catalysts (Figure S28). **A'** and **D** for the terminal alkene and enoate ester cases were evaluated to ensure uniform behavior. Figure S28 shows the comparison of a range of geometric descriptors (lengths and angles) extracted from these six structures. Despite being embedded in very different ligand environments (Grubbs vs. pianostool) the agreement is very good and hence a convincing assignment based on this fingerprint can be made.

Most notably, RCBs **A'** which are direct precursors for cycloreversion show the crucial agostic interaction manifested in short Ru-C $_{\beta}$  contacts and wide C $_{\alpha}$ -C $_{\beta}$ -C $_{\alpha'}$  angles. The C $_{\alpha/\alpha'}$ -C $_{\beta}$  bonds are weakened (lengthened) whereas the Ru-C $_{\alpha/\alpha'}$  bonds are short. The residual alkylidene character at C $_{\alpha}$  (represented by the  $\alpha_{ene}$  angle, Figure S29), which becomes the secondary carbene after cycloreversion, is considerably higher in **A'** than in **D** (which is close to sp<sup>3</sup>-hybridized).

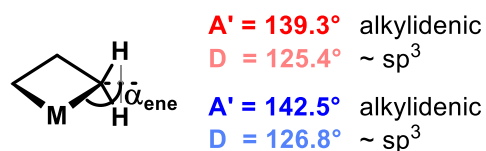

**Figure S29.**  $\alpha_{ene}$  angles of RCBs **A'** and **D**

This analysis shows that the two distinct ruthenacycles **A'** and **D** fulfill the two very different requirements for cycloreversion and reductive elimination, respectively. In the case of **A'** the agostic interaction helps to weaken the C-C bond which is about to be broken in the cycloreversion, whereas reductive elimination is precluded by the strong Ru-C $_{\beta}$  interaction. On the other hand, reductive elimination from **D** is facilitated by weaker Ru-C $_{\alpha/\alpha'}$  bonds and a narrow C $_{\alpha}$ -C $_{\beta}$ -C $_{\alpha'}$  angle holding the two alkyl fragments closely together.

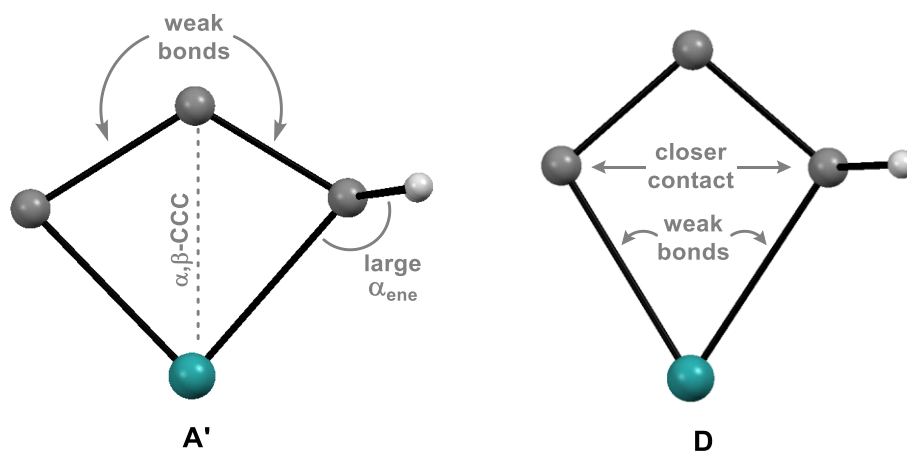

**Figure S30.** Summary and visual comparison of **A'** and **D** (excised from CCSD(T) structures)

The barrier height for cycloreversion ( $\text{TS}_{\text{AB}}$ ) correlates to the stability of the secondary carbene complex (energies relative to initial carbene complex **A**) in that a more exergonic cycloreversion process exhibits a lower activation barrier (Bell-Evans-Polanyi principle, Figure S31).

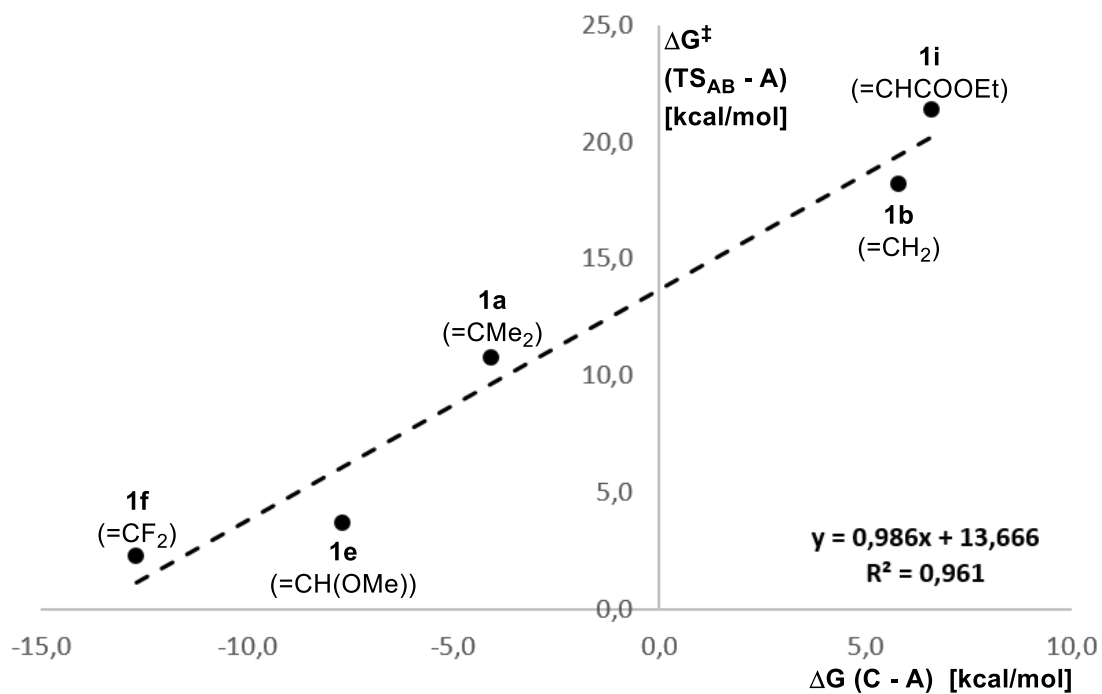

**Figure S31.** Correlation between thermodynamics and kinetics on the metathesis pathway

## COMPUTATIONAL DETAILS

Unless otherwise specified, all calculations were carried out using a development version of the ORCA suite of programs based on version 4.2.<sup>35</sup> Analytical frequency calculations were done to characterize local minima (no imaginary frequencies) and transition states (TS's, one imaginary frequency) and to compute free energy corrections.

For all intermediates and transition states, a preliminary exploration of the conformational space was carried out using the semiempirical tight-binding based quantum chemistry method GFN2-xTB. For these calculations, the XTB code (version 6.1) was used (*Xtb, Version 6.1; University Bonn: 2019; please contact [xtb@thch.uni-bonn.de](mailto:xtb@thch.uni-bonn.de) for access to the program*). The low-energy conformers were further optimized at the B3LYP-D3 level<sup>36,37</sup> with the def2-TZVP(-f) basis sets.<sup>38</sup> For complex **41**, the structure obtained was found to be fully consistent with that experimentally found in the solid state by means of X-Ray spectroscopy (see Figure S37). For transition states, the conformers were generated using a series of constrained/unconstrained geometry optimizations at the B3LYP-D3/def2-TZVP(f) level, as detailed in Ref.<sup>39</sup>

Electronic energies were further refined by means of single point energy calculations at the DLPNO-CCSD(T)/TightPNO level.<sup>40</sup> For these calculations, the def2-TZVPP basis set was used in conjunction with its matching auxiliary /C counterpart. A solvation correction was computed in dichloromethane using the continuum solvation model C-PCM<sup>41</sup> at the same level of theory used for the geometry optimizations and added to the DLPNO-CCSD(T) electronic energy.

The data compiled in Table S9 confirm that SMD and C-PCM solvation schemes provide essentially the same results for all relevant stationary points found along the potential energy surface.

**Table S9.** The effect of different solvation schemes (C-PCM vs SMD) on the key free energy barriers determining the evolution of **A**.

|           | $\Delta G^\ddagger(TS_{AB})$ |      | $\Delta G^\ddagger(TS_{AD})$ |      |
|-----------|------------------------------|------|------------------------------|------|
|           | C-PCM                        | SMD  | C-PCM                        | SMD  |
| <b>1b</b> | 17.8                         | 18.1 | 15.9                         | 15.3 |
| <b>1i</b> | 21.4                         | 21.2 | 11.2                         | 10.8 |
| <b>1a</b> | 10.8                         | 10.8 | 21.6                         | 21.3 |
| <b>1f</b> | 2.3                          | 2.1  | 10.6                         | 9.8  |
| <b>1e</b> | 3.7                          | 3.9  | 15.5                         | 15.3 |

In all cases, the RIJCOSX approximation was used to approximate the two-electron integrals in DFT calculations as well as for the reference part in DLPNO-CCSD(T) calculations. In all cases, the def2/J auxiliary basis set was used in conjunction with the large grid “GridX7”.

## INFLECTION POINTS

As discussed in the main manuscript, depending on the substitution pattern of the substrate and on the transition state conformer considered, the metallacycle **A'** is either a minimum or an “inflection point” on the B3LYP potential energy surface. In order to clarify this aspect, the minimum energy path (MEP) connecting **A** and **D** for substrate **1b** was computed (Figure S32). It was calculated using the Climbing Image Nudged Elastic Band (CI-NEB) method<sup>42</sup> at the B3LYP-D3 level of theory. In this case, a small def2-svp basis set was used in order to speed up the calculation.

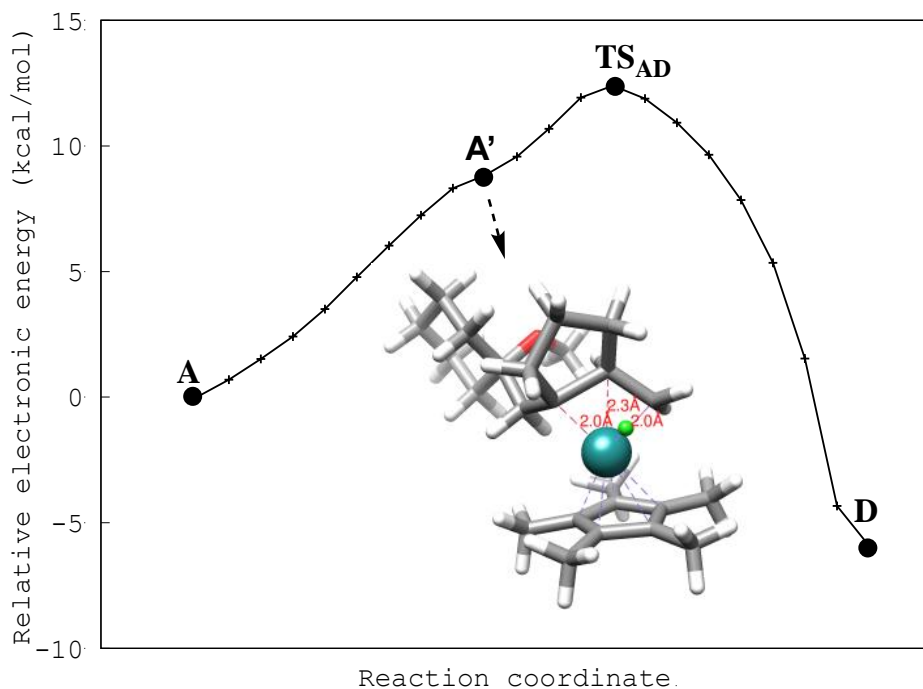

**Figure S32.** Minimum energy path for the first step of the cyclopropanation pathway for substrate **1b**.

From visual inspection of Figure S32, **A'** appears as an inflection point along the MEP. Its energy is  $\sim 3.5$  kcal/mol below that of **TS<sub>AD</sub>**. The full theoretical characterization of **A'** in these situations is beyond the scope of the present work. However, as **A'** is the bifurcation point between the metathesis and the cyclopropanation pathway, its structure is shown in all energy profiles, irrespective of whether it corresponds to a minimum or to an inflection point. In the latter case, the associated Chemdraw structure is shown in gray. For substrates **1a** and **1e**, the relative energy between **A'** and **TS<sub>AD</sub>** was estimated from relaxed scans at the B3LYP-D3/def2-svp level of theory.

## ENERGY PROFILES FOR ADDITIONAL SUBSTRATES

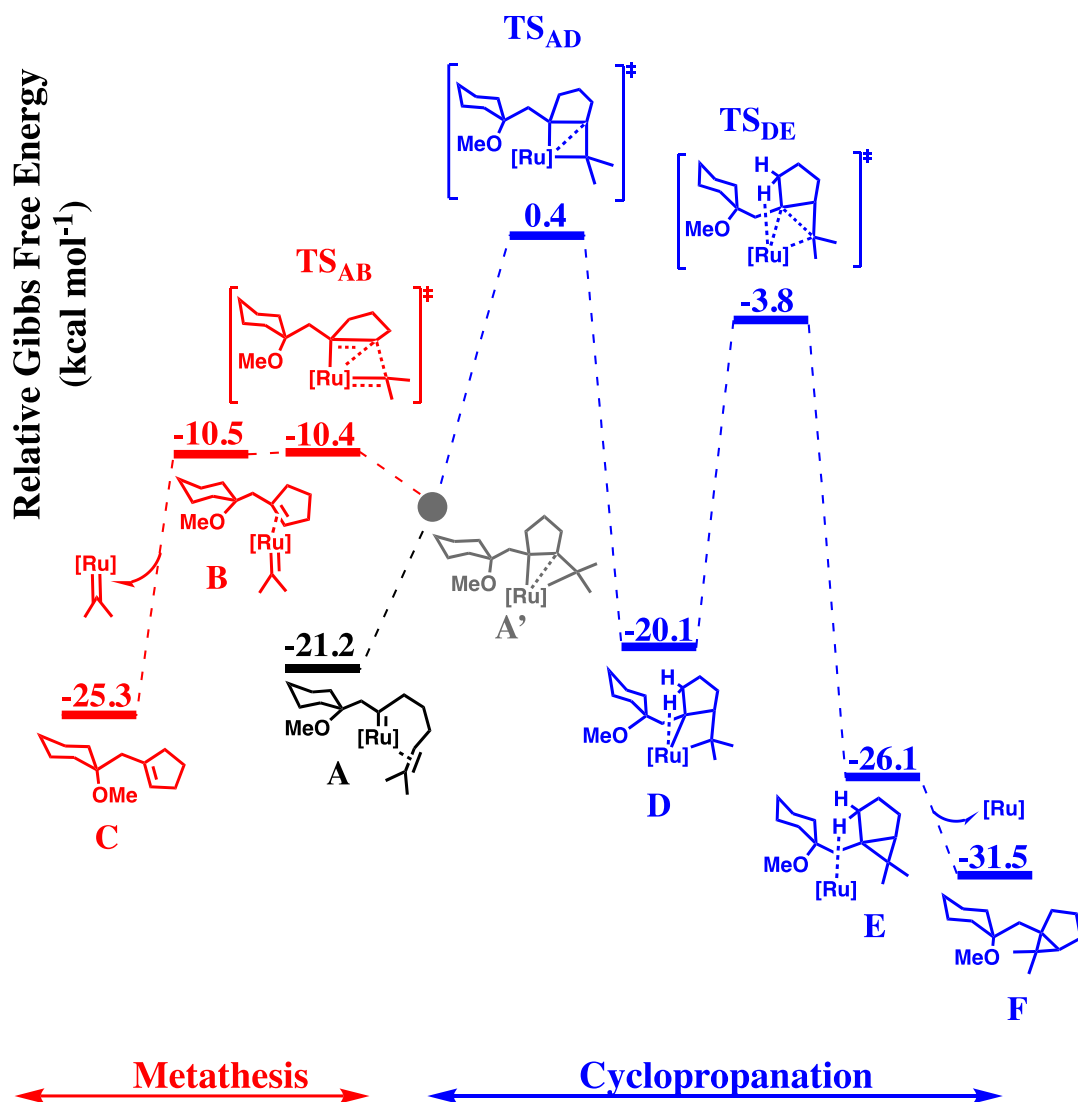

**Figure S33.** Metathesis versus cyclopropanation pathways for a carbene complex derived from enyne **1a**.

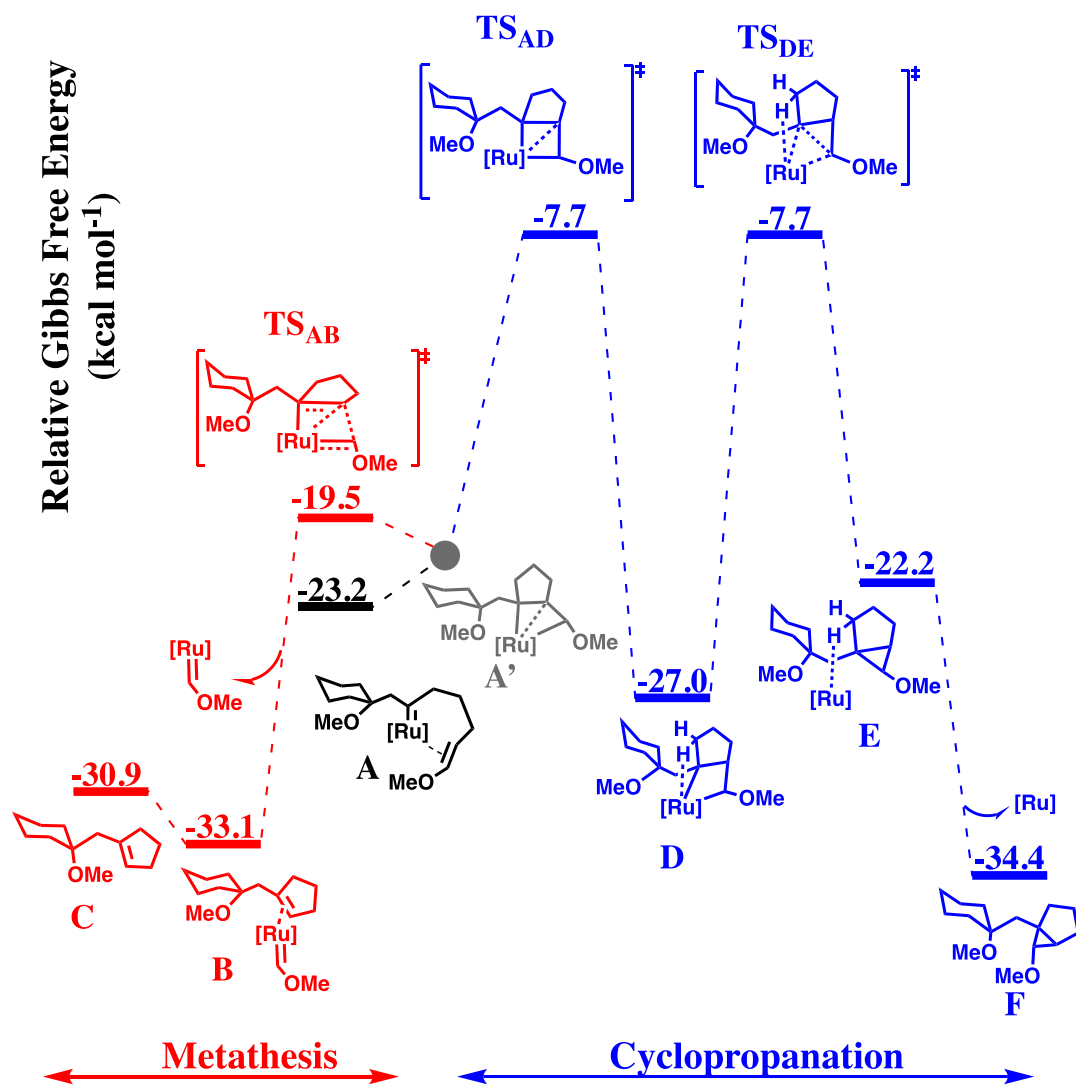

**Figure S34.** Metathesis versus cyclopropanation pathways for a carbene complex derived from enyne **1e**.



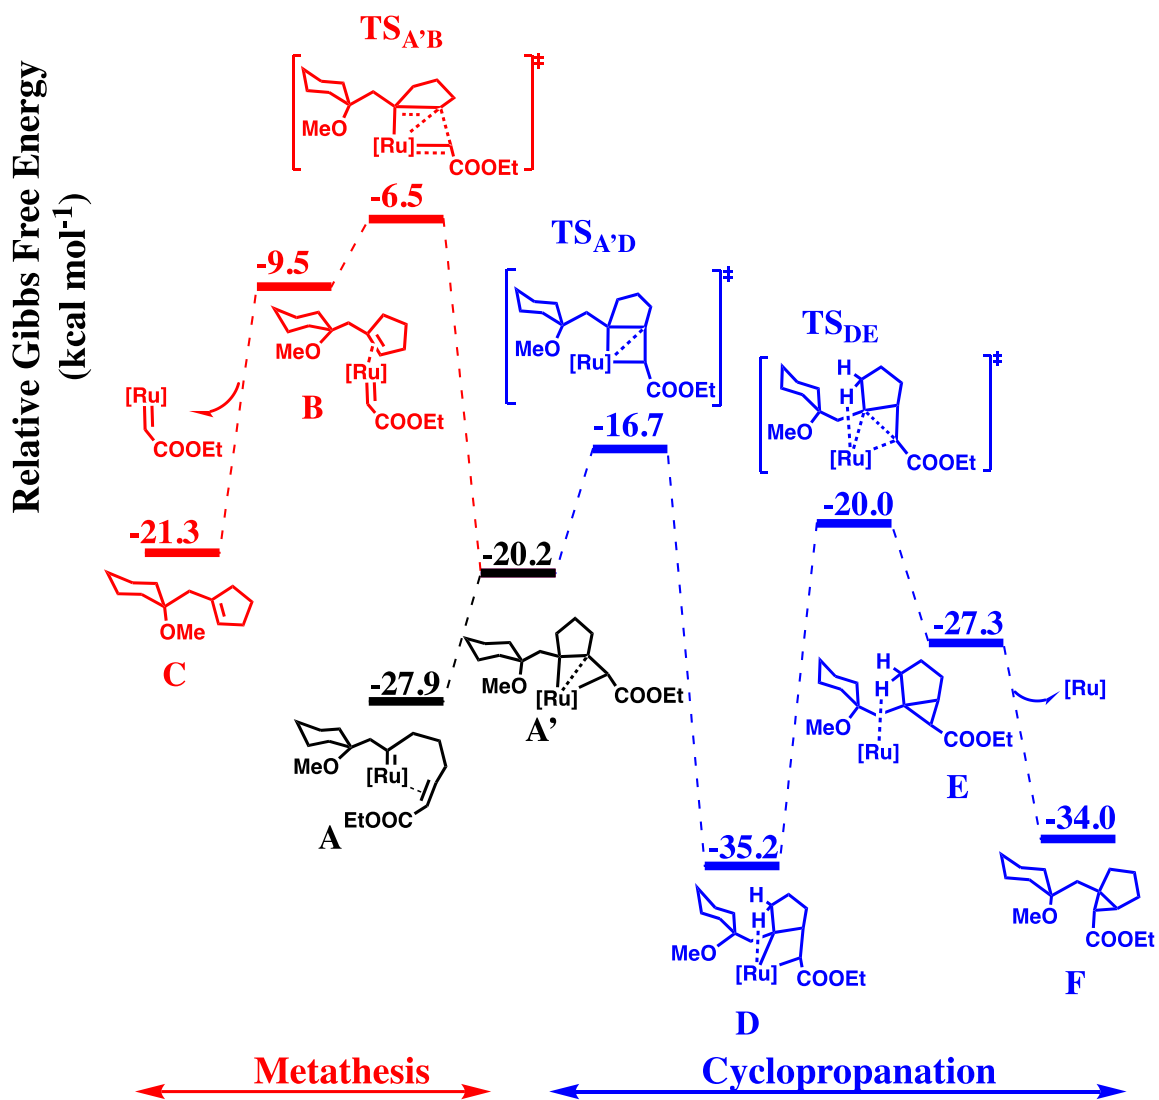

**Figure S35.** Metathesis versus cyclopropanation pathways for a carbene complex derived from enyne **1i**.

## OUTER-SPHERE VERSUS INNER-SPHERE MECHANISM

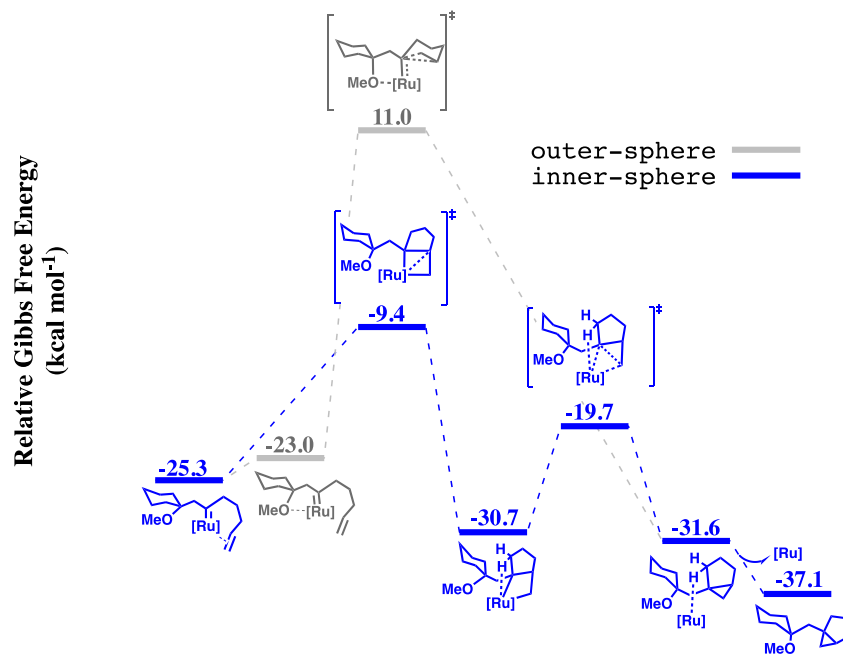

**Figure S36.** Outer-sphere vs inner-sphere cyclopropanation pathways for a carbene complex derived from enyne **1b**.

## HYDROGENATIVE C–H FUNCTIONALIZATION OF COMPOUND 20a

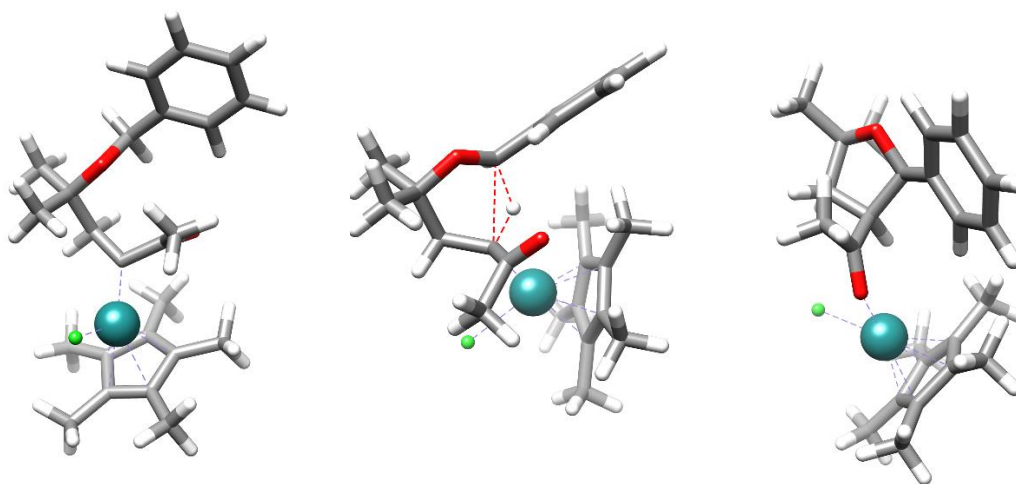

**Figure S37.** Left: Optimized structure for the carbene complex **G** proposed in Scheme 6 of the main manuscript. Centre: Optimized Transition state structure (**H**) for the corresponding C–H functionalization step. The associated free energy barrier was found to be 25.1 kcal/mol. Right: the resulting product in which compound **21** is coordinated to the Ru catalyst; its energy is with respect to the carbene complex **G** is –30.7 kcal/mol.

## STRUCTURE OF COMPLEX 41

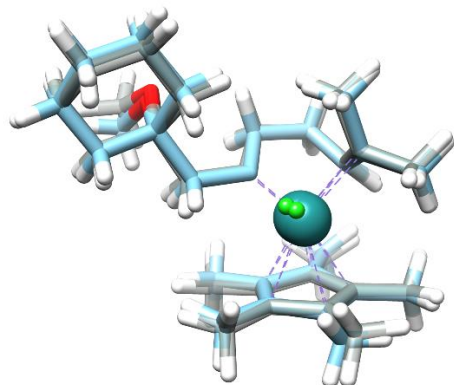

**Figure S38.** Superimposition of computed and experimental structures for complex **41**. The associated root mean square deviation (RMSD) is 0.33 Å

## OPTIMIZED STRUCTURES OF INTERMEDIATES AND TRANSITION STATES IN XYZ FORMAT

### Structures along the reaction profile for Substrate 1a

A

|    |                  |                   |                  |
|----|------------------|-------------------|------------------|
| C  | 5.56911358233041 | 10.95202469369266 | 5.79762654199605 |
| C  | 5.16745964886155 | 12.27179301896823 | 5.42179680042936 |
| C  | 5.12780416668584 | 12.32205490368231 | 3.96935675904403 |
| C  | 5.65365245378540 | 11.12516580506712 | 3.48501532234186 |
| C  | 5.96247640420105 | 10.27180263121796 | 4.62907639276271 |
| C  | 4.51965810013892 | 13.26697605609110 | 6.32827823943529 |
| Ru | 7.34282460808572 | 12.13135226277509 | 4.81789128941340 |
| Cl | 9.00333179913475 | 10.90797885943375 | 3.47827560827265 |
| C  | 4.50131703937755 | 13.42368154974762 | 3.18165963062124 |
| C  | 5.83760214389492 | 10.70946150133144 | 2.06493181227998 |
| C  | 6.43069911196528 | 8.86058135844324  | 4.51247213186228 |
| C  | 5.49663647619375 | 10.39761739054902 | 7.18165496072732 |
| C  | 8.30894782501254 | 11.90491482502500 | 6.42545809551013 |

|   |                   |                   |                   |
|---|-------------------|-------------------|-------------------|
| C | 8.86719896244525  | 10.54189583907395 | 6.73318236887195  |
| C | 10.35768881911556 | 10.43833261708734 | 7.17052967353959  |
| C | 11.24574581547264 | 11.40121139734556 | 6.38207619875730  |
| C | 12.73671551881095 | 11.19663059682982 | 6.65348012940358  |
| C | 13.16331008305585 | 9.74901065569419  | 6.41186031242641  |
| C | 12.30337736783473 | 8.78677409180787  | 7.23226280693806  |
| C | 10.82127690557693 | 8.99271734020979  | 6.92388663016682  |
| O | 10.54126666864367 | 10.82742931012847 | 8.55122925673343  |
| C | 10.00995080444582 | 9.98488031517076  | 9.55034335702029  |
| C | 8.32850862975184  | 12.85044543376784 | 7.59221927295030  |
| C | 8.71392920054274  | 14.29577584166333 | 7.28145385161785  |
| C | 7.45771419199670  | 14.30987812395338 | 4.98924076395079  |
| C | 8.36462911511447  | 13.91839394808474 | 3.98420031050695  |
| C | 9.86042759838248  | 14.00817290245861 | 4.14837950480509  |
| C | 7.96137424891714  | 14.06244937765440 | 2.53041513547441  |
| H | 8.98479946459906  | 12.46690072946097 | 8.37467368529581  |
| H | 7.31120301731918  | 12.84168469280269 | 8.00792628004788  |
| H | 9.74113070012747  | 14.32238529006714 | 6.92109512874496  |
| H | 8.71329658555515  | 14.85927446497653 | 8.21853457603688  |
| H | 8.37121245675822  | 13.24723523728170 | 1.93325111798206  |
| H | 8.36549285513521  | 15.00165865063748 | 2.13260713322450  |
| H | 6.88298251305482  | 14.08567936334011 | 2.39764684403879  |
| H | 10.35757621928168 | 13.34369615603411 | 3.44357071988064  |
| H | 10.20173459362063 | 13.74529922116249 | 5.14076967753687  |
| H | 10.18448816543621 | 15.03431920199937 | 3.93434762477967  |
| H | 8.74503482971747  | 9.89835594197726  | 5.86892077364422  |
| H | 8.26368124517650  | 10.11701770621434 | 7.54372657390674  |
| H | 10.96492103894471 | 12.42101229505051 | 6.64533689014674  |
| H | 11.02305891241991 | 11.26804649860574 | 5.32204865816841  |
| H | 13.31371234868748 | 11.87230939394697 | 6.01695107251476  |
| H | 12.95462085771275 | 11.46934991001332 | 7.68923828865188  |
| H | 13.05306327033219 | 9.50983774302501  | 5.34831223305243  |
| H | 14.22024322367698 | 9.61828936989940  | 6.65803202633009  |
| H | 12.49027314684565 | 8.95399386184215  | 8.29703887795218  |
| H | 12.57989477995528 | 7.75067416325429  | 7.02052425839629  |
| H | 10.19894902140996 | 8.29503315994193  | 7.49037950407832  |
| H | 10.64103297454411 | 8.77683197112421  | 5.86805534384823  |
| H | 8.93595796969163  | 9.80485205093878  | 9.42380194502415  |
| H | 10.16095387552008 | 10.50061084689402 | 10.49820841713839 |
| H | 10.51921646540477 | 9.01747778757544  | 9.59460829516863  |

|   |                  |                   |                  |
|---|------------------|-------------------|------------------|
| H | 4.64241570509992 | 14.28517574015524 | 5.96166500725450 |
| H | 4.93507770109682 | 13.22373346431589 | 7.33438034777498 |
| H | 3.44417681387880 | 13.07513798805875 | 6.40716682639638 |
| H | 5.67598289009281 | 11.54065400080427 | 1.38025013991140 |
| H | 5.13506066559592 | 9.91325299663940  | 1.80114157350132 |
| H | 6.84998688082488 | 10.33523375928221 | 1.90622487203374 |
| H | 5.64186971507676 | 8.22893393210760  | 4.09283077811366 |
| H | 6.70850959352395 | 8.44748201307605  | 5.48099363740944 |
| H | 7.30008173760240 | 8.79910834139543  | 3.85718298423773 |
| H | 4.45971530599834 | 10.14712616119952 | 7.42469572103987 |
| H | 5.83917264801504 | 11.11174037772336 | 7.93026983244174 |
| H | 6.08636777939526 | 9.48945365740435  | 7.28495784692402 |
| C | 7.77152984404811 | 14.98727012801695 | 6.30381436981336 |
| H | 4.73105801693579 | 13.34226287542706 | 2.12100557917014 |
| H | 4.81646736472272 | 14.41206030879387 | 3.51816384350673 |
| H | 3.41280844406875 | 13.38463218681979 | 3.28833563775573 |
| H | 6.82079452871228 | 15.15058991544450 | 6.81956402922133 |
| H | 8.16582566438894 | 15.98842492053570 | 6.08567227984723 |
| H | 6.50165088022025 | 14.65116887777835 | 4.60962559019740 |

**TS<sub>AB</sub>**

|                |                   |                   |                   |
|----------------|-------------------|-------------------|-------------------|
| C              | -0.44762419890621 | -2.70535634034037 | 1.23908455439385  |
| C              | -1.10803405818582 | -3.14287069553608 | -0.08416424822908 |
| C              | -0.81921993654800 | -2.01417160850887 | -1.09058203644919 |
| C              | -0.61438824992369 | -0.76327318439114 | -0.23112213672284 |
| C              | -0.34347308646896 | -1.18157181916830 | 1.15895408405554  |
| R <sub>u</sub> | 1.39903640571622  | -0.15134290537771 | 0.14603198351660  |
| C              | 1.27785874144873  | -0.55761297248986 | 2.05821596723767  |
| C              | -1.57316253409076 | 0.40080369021009  | -0.40825324367202 |
| C              | -3.10132495203970 | 0.18117875481221  | -0.23931938123735 |
| C              | -3.77969048831425 | 1.56298756701015  | -0.33055142122209 |
| C              | -5.29397322849532 | 1.49439736621138  | -0.13879089878826 |
| C              | -5.64547850540269 | 0.83648379914747  | 1.19570742241771  |
| C              | -4.99057834171176 | -0.53914722310216 | 1.31312428912260  |
| C              | -3.47776521374775 | -0.46687531713214 | 1.09627499291828  |
| O              | -3.63648639839594 | -0.72081667894458 | -1.22925114651904 |
| C              | -3.60533494098252 | -0.30889259917421 | -2.58000969416418 |
| C              | 1.35351926538818  | 2.13689660871636  | -0.32585354005291 |
| C              | 2.56158856326464  | 1.77988114552602  | 0.34384378432016  |
| C              | 3.26593713031195  | 0.83732233612318  | -0.46516553004446 |

|    |                   |                   |                   |
|----|-------------------|-------------------|-------------------|
| C  | 2.51359886712924  | 0.67500254591814  | -1.69158632145283 |
| C  | 1.36563766976210  | 1.47727458441038  | -1.60878233289852 |
| C  | 0.42864128261231  | 3.23455083346730  | 0.09185500662493  |
| C  | 3.09245551195533  | 2.41865892314119  | 1.58506279915203  |
| C  | 4.62421834546112  | 0.27104553689068  | -0.21155969062723 |
| C  | 2.94881282114056  | -0.13320306661250 | -2.86726866821392 |
| C  | 0.41672812204939  | 1.71098491355270  | -2.74112979548673 |
| Cl | 2.34895460747600  | -2.36336210715671 | -0.36943474538516 |
| H  | 0.07876295752923  | -2.23859251243719 | -1.66046597835633 |
| H  | -1.64623216433698 | -1.88350161553126 | -1.78162578508175 |
| H  | -0.72295846459158 | -4.10474470020883 | -0.42387582593334 |
| H  | -2.18752729477740 | -3.24483075381400 | 0.04613950019161  |
| H  | -1.43529634299618 | 0.83714317502499  | -1.39311002646135 |
| H  | -1.30202179397530 | 1.17588315010473  | 0.30707708181675  |
| H  | -3.52888890387170 | 2.04016114053684  | -1.28104748620756 |
| H  | -3.34646906760634 | 2.19600514139542  | 0.44949100581586  |
| H  | -5.71747790720480 | 2.50063603982388  | -0.19266415400891 |
| H  | -5.74167350814404 | 0.91762030438640  | -0.95249820650661 |
| H  | -5.29698009537063 | 1.47691123071151  | 2.01486550685577  |
| H  | -6.72969129373920 | 0.75169458622605  | 1.30357369929986  |
| H  | -5.42146249383924 | -1.21240645774351 | 0.56891043364614  |
| H  | -5.19542407637582 | -0.97452970497811 | 2.29456084802759  |
| H  | -3.05095718798955 | -1.46732866964428 | 1.14251393075416  |
| H  | -3.02252153813194 | 0.11918286451930  | 1.90066749720542  |
| H  | -2.59471684298439 | -0.06572813861971 | -2.92339584626076 |
| H  | -4.25446677953298 | 0.55169124353729  | -2.76935992618136 |
| H  | -3.97119440003833 | -1.15280689074803 | -3.16368881493805 |
| H  | 3.74643467942727  | 3.25404215486653  | 1.31603352022859  |
| H  | 3.68227835736083  | 1.72226289388730  | 2.17974272035614  |
| H  | 2.29821257876568  | 2.81658269970885  | 2.21337796967712  |
| H  | 2.11733194618552  | -0.32829635025253 | -3.54376251498658 |
| H  | 3.35001400518318  | -1.09414329783580 | -2.54974316334765 |
| H  | 3.72317357940981  | 0.39853124040830  | -3.42975455735746 |
| H  | 0.05355309722866  | 0.77767692657316  | -3.17238687520330 |
| H  | 0.92521622232377  | 2.26032211995713  | -3.53861417075274 |
| H  | -0.44287613761028 | 2.30530828381688  | -2.43944177376267 |
| H  | -0.54479863731645 | 3.14950447878745  | -0.38746301102569 |
| H  | 0.83988392672467  | 4.21366777499442  | -0.17584246241483 |
| H  | 0.26630545767305  | 3.23715116749739  | 1.17032042449979  |
| H  | -1.03955721412840 | -2.98804136440777 | 2.11206513179100  |

|   |                   |                   |                   |
|---|-------------------|-------------------|-------------------|
| H | 0.52593331729486  | -3.17062856583267 | 1.33374648213531  |
| H | 4.87312162012551  | 0.29906428910507  | 0.84898943177438  |
| H | 5.38910981356462  | 0.83950788438603  | -0.75102862227423 |
| H | 4.67395922319502  | -0.76786748492834 | -0.53349553087642 |
| C | 1.93848974726293  | -1.69244034945332 | 2.78810117828710  |
| H | -0.92663309461946 | -0.63051153488160 | 1.88353446995935  |
| C | 0.83970270441442  | 0.51317406562233  | 3.03447913702776  |
| H | 2.82352593800727  | -1.26944759622219 | 3.27662102144306  |
| H | 1.30359815010183  | -2.09519768830608 | 3.58469018274701  |
| H | 2.27335357948470  | -2.48603592924073 | 2.13078630214339  |
| H | 0.23956627186888  | 0.09034530084270  | 3.84732604665082  |
| H | 1.72400595880978  | 0.95206533545012  | 3.50055369792907  |
| H | 0.27036720243731  | 1.30895699531314  | 2.55730183288098  |

## B

|    |                   |                   |                   |
|----|-------------------|-------------------|-------------------|
| C  | -0.34713512058428 | -2.87329252936159 | -0.44324034371648 |
| C  | -0.36612274264116 | -2.24068491816468 | -1.84054147396450 |
| C  | -1.14358730758794 | -0.93147463167864 | -1.63668136540122 |
| C  | -0.89680637361003 | -0.55104259004650 | -0.18206501347398 |
| C  | -0.40564908551604 | -1.68123097490567 | 0.47787977745978  |
| Ru | 1.33978665658549  | -0.25841059695401 | 0.35601264510516  |
| C  | 0.91999755284050  | 0.30613531435996  | 2.10097301964815  |
| C  | -1.74441139695917 | 0.51211967584646  | 0.47108345958504  |
| C  | -3.27910794679359 | 0.31518656641745  | 0.42979353869816  |
| C  | -3.92856002841738 | 1.39371379153139  | 1.31670794806182  |
| C  | -5.44638095531142 | 1.24290616502942  | 1.40338565952883  |
| C  | -5.82761705848189 | -0.14706200367868 | 1.91562373735674  |
| C  | -5.19502282351212 | -1.24220686207335 | 1.05636920358479  |
| C  | -3.67913180210934 | -1.07067083762797 | 0.94553493645426  |
| O  | -3.81600814209113 | 0.36623456815983  | -0.90857888476162 |
| C  | -3.65722828037646 | 1.56539771813585  | -1.63496410485245 |
| C  | 1.59248343478637  | 1.54434093745911  | -1.12513209673621 |
| C  | 2.60591026914713  | 1.59290381416259  | -0.13177429135029 |
| C  | 3.38834193347246  | 0.41135055829604  | -0.26349096377989 |
| C  | 2.98042568897064  | -0.26058055444732 | -1.49157183456764 |
| C  | 1.91770471234193  | 0.44793823048863  | -2.03092426932418 |
| C  | 0.61799339382820  | 2.63419317261564  | -1.43470354012333 |
| C  | 2.97680076598924  | 2.76248863993502  | 0.72017661905859  |
| C  | 4.64231202285559  | 0.10391232734657  | 0.48597413675452  |
| C  | 3.65588182687257  | -1.46357668353824 | -2.05551340701403 |

|    |                   |                   |                   |
|----|-------------------|-------------------|-------------------|
| C  | 1.35335074736730  | 0.28100483894796  | -3.40512301128885 |
| Cl | 2.45522226776732  | -2.28688461321968 | 1.15215909997632  |
| H  | -0.90195314743143 | -0.15139025144962 | -2.35236189455178 |
| H  | -2.21635520680334 | -1.11264694184819 | -1.73796544472131 |
| H  | 0.65875284828863  | -2.04015074533550 | -2.14666541732657 |
| H  | -0.82003716486587 | -2.88217908112023 | -2.59615829457418 |
| H  | -1.51087441238371 | 1.49809661922480  | 0.06600467678732  |
| H  | -1.48589138425526 | 0.55977391011681  | 1.52559618218702  |
| H  | -3.65376673764578 | 2.38910629152293  | 0.95927177851444  |
| H  | -3.49867128553199 | 1.30304037390781  | 2.31861960159136  |
| H  | -5.85702134400647 | 2.01652255615747  | 2.05729354445987  |
| H  | -5.88574567372559 | 1.39633470299430  | 0.41397440190261  |
| H  | -5.48446002831248 | -0.25372149792636 | 2.95159969740372  |
| H  | -6.91455975631145 | -0.25968741002521 | 1.93283596237230  |
| H  | -5.62834098031946 | -1.21224345295760 | 0.05409562650825  |
| H  | -5.42037004605828 | -2.22740012977495 | 1.47239168128697  |
| H  | -3.26100546632181 | -1.83222420827145 | 0.28699301875598  |
| H  | -3.21659889318234 | -1.21270125533985 | 1.92682797918381  |
| H  | -2.60579953749795 | 1.83907495087149  | -1.76618457092818 |
| H  | -4.18102776057797 | 2.40839967019774  | -1.17276951881528 |
| H  | -4.09113561414661 | 1.38656066235395  | -2.61809387558092 |
| H  | 3.78875022375843  | 3.30926689101420  | 0.23032332548848  |
| H  | 3.33675545006850  | 2.46095162323821  | 1.70197795849841  |
| H  | 2.15436636832326  | 3.46045869299343  | 0.85641069087249  |
| H  | 3.11058968462078  | -1.86557020709976 | -2.90895275229059 |
| H  | 3.73274013499167  | -2.24497118489725 | -1.29732537264631 |
| H  | 4.66913861452451  | -1.22038782313227 | -2.39004651153747 |
| H  | 1.18646020314284  | -0.75978974512983 | -3.67635520229455 |
| H  | 2.06097575640069  | 0.69498304376597  | -4.13038020568778 |
| H  | 0.41770215168060  | 0.81976095442842  | -3.53489408637479 |
| H  | -0.29090119326582 | 2.24025218614387  | -1.88852511065459 |
| H  | 1.04429395055209  | 3.35973017998076  | -2.13574473317329 |
| H  | 0.32729192081341  | 3.17959861683759  | -0.53720119867549 |
| H  | -1.25226785733003 | -3.47273292905849 | -0.27904768849827 |
| H  | 0.51278221659215  | -3.51427703274476 | -0.26258256634164 |
| H  | 4.64097064980661  | 0.57244570779203  | 1.46935230005531  |
| H  | 5.51383730144183  | 0.47410316934388  | -0.06446367947523 |
| H  | 4.75332147608267  | -0.96819820807075 | 0.63376870735278  |
| C  | 0.77217853962133  | -0.58597326828794 | 3.30029122738882  |
| H  | -0.55175999188658 | -1.84694512598175 | 1.53398188976039  |



|   |                   |                   |                  |
|---|-------------------|-------------------|------------------|
| C | 0.64521601945992  | 1.73483140450743  | 2.48651997465343 |
| H | 1.27680428245038  | -0.14463832590804 | 4.16782174426994 |
| H | -0.29218141434333 | -0.63501727853693 | 3.56829978317196 |
| H | 1.14412887579125  | -1.59099004072239 | 3.13718224496538 |
| H | -0.23351722213759 | 1.77721392294447  | 3.13914025127161 |
| H | 1.47542357834035  | 2.13043186899482  | 3.08069228846220 |
| H | 0.47385666275662  | 2.39206362125112  | 1.64110040606586 |

**C (secondary carbene)**

|    |                  |                   |                  |
|----|------------------|-------------------|------------------|
| C  | 5.84056000000000 | 10.79262200000000 | 5.27629100000000 |
| C  | 5.16364200000000 | 11.94161400000000 | 4.67590600000000 |
| C  | 5.45125800000000 | 11.92958500000000 | 3.27480900000000 |
| C  | 6.42032300000000 | 10.89193600000000 | 3.05300000000000 |
| C  | 6.56348900000000 | 10.13381700000000 | 4.28173200000000 |
| C  | 4.16395600000000 | 12.80293500000000 | 5.37300600000000 |
| Ru | 7.25163600000000 | 12.36550800000000 | 4.39444000000000 |
| Cl | 9.40530800000000 | 11.92146700000000 | 5.19674000000000 |
| C  | 4.81318200000000 | 12.77613000000000 | 2.22492600000000 |
| C  | 7.00643500000000 | 10.49793200000000 | 1.74017600000000 |
| C  | 7.48164000000000 | 8.96773200000000  | 4.43971600000000 |
| C  | 5.76672700000000 | 10.44556000000000 | 6.72486100000000 |
| C  | 7.38842100000000 | 14.17424000000000 | 3.92088600000000 |
| C  | 7.61036300000000 | 14.72862800000000 | 2.55299400000000 |
| C  | 7.23200500000000 | 15.22198600000000 | 4.98456800000000 |
| H  | 6.47684600000000 | 15.96625900000000 | 4.70138300000000 |
| H  | 8.18364600000000 | 15.75787800000000 | 5.09100900000000 |
| H  | 6.97805400000000 | 14.80976600000000 | 5.96009300000000 |
| H  | 7.62413100000000 | 13.96235900000000 | 1.78128400000000 |
| H  | 8.58591500000000 | 15.23060200000000 | 2.53983200000000 |
| H  | 6.86480400000000 | 15.49292100000000 | 2.29753400000000 |
| H  | 4.04049900000000 | 13.75664600000000 | 4.86104800000000 |
| H  | 4.47042900000000 | 13.01292200000000 | 6.39779400000000 |
| H  | 3.18454600000000 | 12.31462200000000 | 5.41364300000000 |
| H  | 7.06967600000000 | 11.34743400000000 | 1.06159500000000 |
| H  | 6.39035300000000 | 9.72990400000000  | 1.25977600000000 |
| H  | 8.00923100000000 | 10.09242300000000 | 1.86734500000000 |
| H  | 7.19115900000000 | 8.15404100000000  | 3.77024400000000 |
| H  | 7.46684100000000 | 8.58576400000000  | 5.45849900000000 |
| H  | 8.51158900000000 | 9.24816900000000  | 4.21083700000000 |
| H  | 4.82001100000000 | 9.94789300000000  | 6.95652900000000 |

|   |                  |                   |                  |
|---|------------------|-------------------|------------------|
| H | 5.82793200000000 | 11.34181600000000 | 7.34286300000000 |
| H | 6.58018200000000 | 9.78591900000000  | 7.01931700000000 |
| H | 5.48592000000000 | 12.95427400000000 | 1.38732400000000 |
| H | 4.51059600000000 | 13.74488600000000 | 2.62091000000000 |
| H | 3.91984500000000 | 12.28208700000000 | 1.83067300000000 |

**TS<sub>AD</sub>**

|    |                   |                   |                   |
|----|-------------------|-------------------|-------------------|
| C  | 3.91999957714485  | 0.75581646554822  | -0.62674279944961 |
| C  | 3.20517669490933  | 0.67027996715275  | -1.82354179535478 |
| C  | 1.88982939013445  | 1.26687402666238  | -1.61825977785307 |
| C  | 1.85264200786389  | 1.79628896318322  | -0.28853752831852 |
| C  | 3.07086679952158  | 1.39562234638842  | 0.34593530492216  |
| Ru | 1.92030331889269  | -0.44328391480624 | -0.30742623766182 |
| Cl | 2.72257973266892  | -2.53500467058851 | -1.08964748108801 |
| C  | 3.67047735290417  | 0.07132298075424  | -3.10664031251303 |
| C  | 0.93682910484261  | 1.55644285747817  | -2.73083103745984 |
| C  | 0.90465526977464  | 2.83235263669996  | 0.21941945665860  |
| C  | 3.57461578069346  | 1.86770552146719  | 1.67116168100314  |
| C  | 5.28722486342364  | 0.22024210816133  | -0.36752958084823 |
| C  | -0.49601058238893 | -2.26768309842629 | -1.07599583069781 |
| C  | -0.85552298688305 | -3.41326104643282 | -0.11568178648171 |
| C  | 0.03388189802910  | -3.15570686744023 | 1.10653407142012  |
| C  | -0.03410025885931 | -1.63061671721173 | 1.27546183315159  |
| C  | -0.18099056034950 | -1.06696437548289 | -0.14888856343084 |
| C  | -1.13047138194322 | 0.12078291588264  | -0.29002351105210 |
| C  | -2.67855801273863 | 0.02304294033974  | -0.08202914375299 |
| C  | -3.39190691251137 | -0.89014613696912 | -1.08790458439240 |
| C  | -4.91744625793286 | -0.78994098544751 | -1.02329305172838 |
| C  | -5.40473671072814 | 0.64392677948641  | -1.20885777950322 |
| C  | -4.74978743255715 | 1.55950360517838  | -0.17724728045970 |
| C  | -3.22624692626791 | 1.45886521285830  | -0.24222915422275 |
| C  | 1.20694556071829  | -0.86583582953869 | 1.72390107225407  |
| C  | 0.84890898142385  | 0.25297718106087  | 2.67295929718367  |
| O  | -3.03541461598863 | -0.53834770580932 | 1.19941804825140  |
| C  | -2.87268191891983 | 0.26956281952035  | 2.34525463329982  |
| C  | 2.37540203662260  | -1.67048599882282 | 2.27644495416558  |
| H  | 0.35542323356260  | -2.56014518186168 | -1.67883284206138 |
| H  | -1.29696909676384 | -2.03001820030932 | -1.77134101202423 |
| H  | -0.68729048933881 | -4.39803875581189 | -0.55578767186366 |
| H  | -1.90755805365482 | -3.35160312143402 | 0.17621081284845  |

|   |                   |                   |                   |
|---|-------------------|-------------------|-------------------|
| H | -1.01926064185376 | 0.53156582398559  | -1.29360214827805 |
| H | -0.79597917943660 | 0.90497614262981  | 0.38553364390046  |
| H | -3.09809197785501 | -1.91933529368748 | -0.90001857407685 |
| H | -3.05022158833198 | -0.62948360664840 | -2.09412905755073 |
| H | -5.35173119672155 | -1.44303312017875 | -1.78478648912913 |
| H | -5.25454486620341 | -1.16425166050367 | -0.05353513530961 |
| H | -5.14865631376510 | 0.99103294699239  | -2.21709128350121 |
| H | -6.49353969841286 | 0.69355970433583  | -1.12595522706927 |
| H | -5.09909193134548 | 1.27709345367268  | 0.81945586443600  |
| H | -5.05331730828720 | 2.59816842368257  | -0.33431657372446 |
| H | -2.76662984967843 | 2.11395477249234  | 0.50172459410062  |
| H | -2.88992213733901 | 1.82652397638878  | -1.21643310802281 |
| H | -3.64896583664469 | 1.03757144393543  | 2.42408104763870  |
| H | -1.89735936159225 | 0.75781793796558  | 2.38368519193955  |
| H | -2.95511055097805 | -0.39439386808263 | 3.20573096984708  |
| H | 0.00677130994545  | 1.98269775011163  | -2.36409287977147 |
| H | 0.69608176484502  | 0.65660627133919  | -3.29765703221487 |
| H | 1.38166167925619  | 2.27616685544204  | -3.42530761782022 |
| H | 2.80432902682797  | 2.38106099827789  | 2.23925788748693  |
| H | 4.39361473603825  | 2.57493672729830  | 1.51053823175042  |
| H | 3.96601996146021  | 1.05471573317711  | 2.28202325802111  |
| H | 6.05316516469711  | 0.94281766437242  | -0.66621933016878 |
| H | 5.45695067928931  | -0.70136574743848 | -0.92320207329188 |
| H | 5.43118243110400  | 0.00358435455480  | 0.69013017559600  |
| H | 2.85621926859763  | -0.43282329788969 | -3.62508267506724 |
| H | 4.46052768489558  | -0.65828005934101 | -2.94465704480392 |
| H | 4.05343871104996  | 0.85658631558972  | -3.76659036520771 |
| H | -0.30117088458263 | -3.68547996133246 | 2.00001052308210  |
| H | 1.04488681752303  | -3.48716568221511 | 0.87778925888429  |
| H | 1.32427683760319  | 3.82879240394763  | 0.04574004111531  |
| H | 0.72156416493079  | 2.73915059091280  | 1.28776715270590  |
| H | -0.05475163142319 | 2.78876655087340  | -0.28974134682790 |
| H | -0.89146120588947 | -1.40142575409518 | 1.91222230445639  |
| H | 3.23391141442617  | -1.03380683402558 | 2.49330896240780  |
| H | 2.05716201453657  | -2.12389931238841 | 3.22668476652423  |
| H | 2.70379707319613  | -2.47353393391992 | 1.62520399117691  |
| H | 1.71718217781019  | 0.79225675973563  | 3.04079282543288  |
| H | 0.15702970239950  | 0.96544301421725  | 2.23227136370503  |
| H | 0.33996313460372  | -0.18209720561355 | 3.54303250468787  |

**D**

|    |                   |                   |                   |
|----|-------------------|-------------------|-------------------|
| C  | 3.47047155953155  | 0.70077284452468  | -0.79658979717226 |
| C  | 2.55218514797529  | 0.78319917722281  | -1.86103477020634 |
| C  | 1.44246705014468  | 1.58632181606044  | -1.42464866206672 |
| C  | 1.69824068081229  | 2.01052441942339  | -0.07706853675315 |
| C  | 2.93114863628486  | 1.39943257010201  | 0.33604418639884  |
| Ru | 1.42610187421589  | -0.19268480091364 | -0.08372004505027 |
| Cl | 2.76154830321812  | -2.22605562427095 | 0.07045751923560  |
| C  | 2.72446735388933  | 0.18492177255932  | -3.21907535853175 |
| C  | 0.40276439808997  | 2.13905344578268  | -2.34658929557160 |
| C  | 0.99704721390655  | 3.13355290590266  | 0.61415814762092  |
| C  | 3.69893384463888  | 1.65745599136663  | 1.59183055627475  |
| C  | 4.80348122610898  | 0.04037090103815  | -0.83489464289493 |
| C  | -0.38698436651331 | -1.46454791037648 | -0.82585554455408 |
| C  | -0.53498359703819 | -2.86390470482773 | -0.21779966738520 |
| C  | -0.82957149241105 | -2.62552996317482 | 1.28046658952741  |
| C  | -0.65094028455638 | -1.12153990358373 | 1.56028018634368  |
| C  | -0.69859949465111 | -0.44184730211144 | 0.19308901356672  |
| C  | -1.67322350395563 | 0.66412825942880  | -0.10876448439524 |
| C  | -3.18663926565110 | 0.34506263512371  | 0.00485514569650  |
| C  | -3.58115635964900 | -0.87831427297534 | -0.82817062594466 |
| C  | -5.09174855561487 | -1.11754992804660 | -0.84890314183597 |
| C  | -5.85406549585529 | 0.11816972536850  | -1.32572783856187 |
| C  | -5.48617951485990 | 1.34297960360211  | -0.48756300511116 |
| C  | -3.97537434247431 | 1.57165036937677  | -0.49040246909745 |
| C  | 0.72367795944169  | -0.60960184795585 | 1.99348616442210  |
| C  | 0.51061058092241  | 0.67709321738417  | 2.77709137587894  |
| O  | -3.56632361152859 | -0.01060362422742 | 1.34778383652281  |
| C  | -3.48367090657419 | 0.98990669265677  | 2.34217171775159  |
| C  | 1.56601458627552  | -1.54329679976126 | 2.84085370526123  |
| H  | 0.73939715567206  | -1.38319672292917 | -1.20844296619974 |
| H  | -0.87364815601284 | -1.30161721176754 | -1.78651190969071 |
| H  | 0.36832139558948  | -3.45108085796631 | -0.36588992699494 |
| H  | -1.35725295586698 | -3.38834186282836 | -0.70756341292341 |
| H  | -1.51603152164071 | 1.01137829360678  | -1.12742090514057 |
| H  | -1.47163065138680 | 1.51884264523039  | 0.53788011955684  |
| H  | -3.07380286599247 | -1.75569001304000 | -0.42952170453628 |
| H  | -3.21912228315879 | -0.72904763792225 | -1.85019497852664 |
| H  | -5.31533926863470 | -1.97316735735477 | -1.49123209420556 |
| H  | -5.42005382232276 | -1.38055680408066 | 0.15905110754883  |

|   |                   |                   |                   |
|---|-------------------|-------------------|-------------------|
| H | -5.60878106589638 | 0.31496930371503  | -2.37630685112911 |
| H | -6.93132991989599 | -0.06077666964526 | -1.28368828661110 |
| H | -5.83285253913886 | 1.19344299960064  | 0.53847803911582  |
| H | -5.99398143550935 | 2.23322471080547  | -0.86743557519751 |
| H | -3.71271866187317 | 2.44998735027898  | 0.10430745313546  |
| H | -3.64624218934878 | 1.78710275477588  | -1.51144894254248 |
| H | -4.21124450492923 | 1.79265513868005  | 2.18592279235500  |
| H | -2.48489002413007 | 1.42941742505188  | 2.41585359729318  |
| H | -3.70908640327362 | 0.49794224961508  | 3.28749438085869  |
| H | -0.37063430999331 | 2.68011037444020  | -1.80742706188778 |
| H | -0.07794966595866 | 1.36066071240028  | -2.94068202364941 |
| H | 0.86684518959812  | 2.84003940883111  | -3.04706150935919 |
| H | 3.09460553146511  | 2.17038927986969  | 2.33533040542515  |
| H | 4.57009686682330  | 2.28590676436314  | 1.38346325307273  |
| H | 4.05786970605172  | 0.72832893039479  | 2.03438882763565  |
| H | 5.55679589218248  | 0.77365537948190  | -1.14357635423942 |
| H | 4.82165110705375  | -0.78928790886152 | -1.53738557587639 |
| H | 5.08330227583174  | -0.34855781723901 | 0.14097641111527  |
| H | 1.76367328603265  | 0.03653269133408  | -3.71171595582524 |
| H | 3.22342941067264  | -0.78201396918311 | -3.15940090650059 |
| H | 3.32708707455602  | 0.83404744487567  | -3.86209293356608 |
| H | -1.86441900441688 | -2.89301538728516 | 1.50035921227779  |
| H | -0.19954031729771 | -3.24144140352332 | 1.91879230302040  |
| H | 1.34437282599571  | 4.08668604935063  | 0.20243600008689  |
| H | 1.19830873305446  | 3.14290207708414  | 1.68152289508018  |
| H | -0.08230525195008 | 3.09480844379020  | 0.47605575915630  |
| H | -1.43333401208437 | -0.79260468306654 | 2.24480558244222  |
| H | 2.54672251860937  | -1.10886729886544 | 3.04536590477635  |
| H | 1.06524235977522  | -1.69754626013283 | 3.80820745520330  |
| H | 1.73687941775669  | -2.51170523338541 | 2.38492375149720  |
| H | 1.44904281484959  | 1.15651384429651  | 3.05044136624244  |
| H | -0.10120147402832 | 1.40057265618304  | 2.24427648534027  |
| H | -0.01469488095236 | 0.44159450632274  | 3.71393051299773  |

**TS<sub>DE</sub>**

|   |                  |                  |                   |
|---|------------------|------------------|-------------------|
| C | 3.45043717017155 | 0.89150652819795 | -0.70718605501554 |
| C | 2.65007417584463 | 0.82853969903113 | -1.88388909884751 |
| C | 1.43640128003901 | 1.57252099252465 | -1.62446161920630 |
| C | 1.49437476139094 | 2.07964188590075 | -0.29148810512379 |
| C | 2.72206872655409 | 1.60616272953616 | 0.29657020001598  |

|    |                   |                   |                   |
|----|-------------------|-------------------|-------------------|
| Ru | 1.56741444548198  | -0.12898327217485 | -0.28487561341015 |
| Cl | 2.88286947014953  | -2.23289922781800 | -0.38956318356195 |
| C  | 3.03607662977702  | 0.18933248542373  | -3.17642108893663 |
| C  | 0.40798190975882  | 1.88659688055499  | -2.66178552654740 |
| C  | 0.60429667399679  | 3.11298742130647  | 0.31655709319564  |
| C  | 3.27327810812518  | 2.00110787732272  | 1.62672139907198  |
| C  | 4.82779540997352  | 0.34877489080116  | -0.54197319027345 |
| C  | -0.37249166116625 | -1.64389095085048 | -0.80262210860356 |
| C  | -0.36537520667934 | -3.07602624899366 | -0.24081222887816 |
| C  | -0.97326803861129 | -2.98733786313062 | 1.17637696675305  |
| C  | -0.91225111988854 | -1.51918288228599 | 1.58290489894272  |
| C  | -0.63559230051302 | -0.70103688274217 | 0.35596818097444  |
| C  | -1.48101596081277 | 0.52846882810819  | 0.08224075545443  |
| C  | -3.02224338128025 | 0.40329238041915  | 0.20188950162432  |
| C  | -3.57485746769796 | -0.86283915091119 | -0.45903122898875 |
| C  | -5.10292760443282 | -0.91593538973172 | -0.45397059693409 |
| C  | -5.70739842301553 | 0.31925631610720  | -1.11993693180980 |
| C  | -5.18580047329384 | 1.59877113167000  | -0.46573205390558 |
| C  | -3.65710174010834 | 1.63589487199539  | -0.46930406015624 |
| C  | 0.40401455272428  | -0.88139459310686 | 1.90414559248286  |
| C  | 0.28387566394527  | 0.31861708685120  | 2.81442423031003  |
| O  | -3.42950734518466 | 0.29391721195553  | 1.58520407326105  |
| C  | -3.33767708335593 | 1.44778479876186  | 2.39510661280496  |
| C  | 1.50649459401807  | -1.80604112697396 | 2.38248006477169  |
| H  | 0.57340409999490  | -1.46128068305076 | -1.38647379569020 |
| H  | -1.14013438083637 | -1.47479048236059 | -1.55799526997729 |
| H  | 0.65892092636325  | -3.43767971270764 | -0.20694977972632 |
| H  | -0.93114455591407 | -3.75046684165196 | -0.88426038356971 |
| H  | -1.26339020944969 | 0.85999530384460  | -0.92931088524357 |
| H  | -1.18019961687269 | 1.34769215675923  | 0.72545351288534  |
| H  | -3.16946349841609 | -1.73825400091130 | 0.04555683421722  |
| H  | -3.21657842836122 | -0.89106921956296 | -1.49209493722077 |
| H  | -5.43603389159745 | -1.82364691017016 | -0.96329421769082 |
| H  | -5.45236457000896 | -0.98200260570718 | 0.57875923247489  |
| H  | -5.44345072997865 | 0.32470969591556  | -2.18413289999970 |
| H  | -6.79836440223585 | 0.28509598771918  | -1.06783091555968 |
| H  | -5.55521188300735 | 1.64974417499071  | 0.56173978407877  |
| H  | -5.57370942652894 | 2.47935732574047  | -0.98405193132223 |
| H  | -3.28908319748817 | 2.55038981252305  | 0.00262889502904  |
| H  | -3.30351906127684 | 1.66473482188334  | -1.50403475871332 |

|   |                   |                   |                   |
|---|-------------------|-------------------|-------------------|
| H | -4.12318968315778 | 2.17544817821999  | 2.16865875420884  |
| H | -2.36969102998069 | 1.95026932881807  | 2.31358631031635  |
| H | -3.46085643124536 | 1.11164911155875  | 3.42403400758956  |
| H | -0.48340731039127 | 2.33713003549108  | -2.22909581508470 |
| H | 0.10395271649517  | 0.99386949055151  | -3.21018097528711 |
| H | 0.81265129011682  | 2.59468228200586  | -3.39129452761332 |
| H | 2.49332365153524  | 2.35826042920818  | 2.29609385219117  |
| H | 4.00161502797663  | 2.81049394591299  | 1.51039362585619  |
| H | 3.78230513481345  | 1.16885869594953  | 2.11254102367243  |
| H | 5.55706111659073  | 1.13985751625411  | -0.74707499700761 |
| H | 5.01267340530713  | -0.48262222136460 | -1.21636968857253 |
| H | 4.99242267602071  | -0.01273307524606 | 0.47149915816315  |
| H | 2.15644658694946  | -0.06267086568648 | -3.76897227935828 |
| H | 3.58950929838757  | -0.73152609364598 | -2.99873897224837 |
| H | 3.66085388817148  | 0.85923978973825  | -3.77598214347976 |
| H | -2.02065999670382 | -3.29596202744247 | 1.17007252051139  |
| H | -0.45781835655848 | -3.64287394878908 | 1.87911024533185  |
| H | 1.08037915685153  | 4.09667110637193  | 0.25090871098326  |
| H | 0.41280762996908  | 2.91810620185173  | 1.37140036641904  |
| H | -0.35378958422645 | 3.18112070638914  | -0.19421970650926 |
| H | -1.74183384008292 | -1.18558252745566 | 2.19498075659706  |
| H | 2.46373599562124  | -1.29509262592676 | 2.45933365611606  |
| H | 1.20952360849095  | -2.14214134813230 | 3.38698532995838  |
| H | 1.65866394166959  | -2.67686334989413 | 1.75879696780265  |
| H | 1.25148734939105  | 0.78791553628357  | 2.97243004241657  |
| H | -0.40755470142033 | 1.07379313347316  | 2.45495339872138  |
| H | -0.08898248088668 | -0.01711465549664 | 3.78992601486967  |

## E

|    |                  |                   |                  |
|----|------------------|-------------------|------------------|
| C  | 4.91542220275077 | 12.15774761900950 | 4.97244417514437 |
| C  | 4.90329402483756 | 11.89075992546928 | 3.55169150108211 |
| C  | 5.36735425075615 | 10.54675992544656 | 3.36410444190834 |
| C  | 5.63508864182747 | 9.97776286688041  | 4.66703714952103 |
| C  | 5.33738485236784 | 10.96603607302932 | 5.65517412821925 |
| C  | 4.46551705093547 | 12.83412620295627 | 2.48355290962466 |
| Ru | 6.86588791317853 | 11.69781282110222 | 4.29374904300850 |
| Cl | 8.12342595263948 | 12.89174951804972 | 2.70662932850742 |
| C  | 5.50354073433332 | 9.83633745183048  | 2.06026751725510 |
| C  | 6.05593815259363 | 8.56713034339711  | 4.91203975958181 |
| C  | 5.41382839082402 | 10.79858437718915 | 7.13716745377707 |

|   |                   |                   |                   |
|---|-------------------|-------------------|-------------------|
| C | 4.46875918370381  | 13.42573807274377 | 5.61681474093221  |
| C | 9.06840056605426  | 12.87247597682254 | 7.05233727892221  |
| C | 9.16204424993006  | 11.97558228469352 | 5.83962886923617  |
| C | 10.30888907351591 | 10.94664047938720 | 5.76623812955091  |
| C | 11.66649607076675 | 11.64698632147727 | 5.88268527385525  |
| C | 12.83861106700810 | 10.68485538445057 | 5.68759691360214  |
| C | 12.73735731085742 | 9.94568065088972  | 4.35315591256726  |
| C | 11.39239006053287 | 9.22820849310213  | 4.22479104766672  |
| C | 10.23179651865058 | 10.20161135190863 | 4.42536560721679  |
| O | 10.28889891634759 | 10.03234773935462 | 6.88375960020323  |
| C | 9.25779601031519  | 9.07291823673440  | 6.91837318100124  |
| C | 8.91113815742261  | 12.19794768692346 | 8.41598953856857  |
| C | 8.01474741987759  | 13.09825693723383 | 9.29804760979648  |
| C | 8.15901081192881  | 14.08843809938164 | 7.05924393480410  |
| C | 9.65681775626899  | 14.28290268473399 | 7.02466009808732  |
| C | 10.43501905974522 | 14.82609707215717 | 8.20488255805753  |
| C | 10.19316789936364 | 14.84643323318652 | 5.72109631316045  |
| H | 9.86888699484827  | 11.97894327352452 | 8.88905510391733  |
| H | 8.42597235820389  | 11.23612460821184 | 8.26135426390492  |
| H | 8.58826641668681  | 13.56320990239971 | 10.09861278196130 |
| H | 7.23596193186629  | 12.51036428930413 | 9.78662402901305  |
| H | 11.24200014146507 | 14.57985892975955 | 5.57461775738190  |
| H | 10.13475958355444 | 15.93792891228839 | 5.75409409394766  |
| H | 9.63297054849128  | 14.52109101961597 | 4.84632593779318  |
| H | 11.49895565474888 | 14.60939441627765 | 8.07580311558715  |
| H | 10.13365153199958 | 14.41445362736726 | 9.16299875128581  |
| H | 10.32998000891158 | 15.91311691965059 | 8.26100344001103  |
| H | 9.25308008954042  | 12.58212483469097 | 4.94483621057773  |
| H | 8.19826606596925  | 11.39385678363407 | 5.78494347109202  |
| H | 11.72913886856197 | 12.13497475572790 | 6.85634242358792  |
| H | 11.70668898590970 | 12.43000957914418 | 5.12284580890929  |
| H | 13.77769371388874 | 11.24180722260873 | 5.74136712343243  |
| H | 12.84776711665371 | 9.96172860125782  | 6.50629524496198  |
| H | 12.83928418230981 | 10.66416038344191 | 3.53179634574586  |
| H | 13.55846908144482 | 9.23145078262801  | 4.25130932296740  |
| H | 11.34146344288646 | 8.42830432551949  | 4.96892369464296  |
| H | 11.30594084126979 | 8.75464786266005  | 3.24359948610417  |
| H | 9.26931930679646  | 9.68831550615221  | 4.33940904896551  |
| H | 10.23563805095881 | 10.94944984358666 | 3.62949378966297  |
| H | 8.26675461359277  | 9.52240995944271  | 6.81242004145246  |



|   |                  |                   |                  |
|---|------------------|-------------------|------------------|
| H | 9.31543828121766 | 8.59134338431886  | 7.89438368815849 |
| H | 9.37067417418147 | 8.30796573017368  | 6.14344421058588 |
| H | 5.00146605943213 | 12.65039627783689 | 1.55426220597041 |
| H | 4.65696733698199 | 13.86723755702540 | 2.76973202444211 |
| H | 3.39334869873236 | 12.72721846891890 | 2.29086396149432 |
| H | 6.77831150457732 | 8.23247445388166  | 4.16752521807075 |
| H | 5.19255047810548 | 7.89615768880609  | 4.86073557029560 |
| H | 6.50900049705680 | 8.44741492826134  | 5.89401513054288 |
| H | 4.43552882669111 | 10.52986534354631 | 7.54756607187572 |
| H | 5.73630224824639 | 11.71746972697545 | 7.62471021402478 |
| H | 6.11433528201650 | 10.01325378322958 | 7.41708523543097 |
| H | 3.38647311660520 | 13.40949000829546 | 5.78266029714699 |
| H | 4.69727795453210 | 14.28852003115927 | 4.99253528680048 |
| H | 4.95068274298774 | 13.57241641719920 | 6.58135920210725 |
| C | 7.40220263685610 | 14.17175101741783 | 8.36786471798702 |
| H | 6.31398666458788 | 9.10869121209490  | 2.09093219370170 |
| H | 5.71463472116496 | 10.53534636174386 | 1.25311913168911 |
| H | 4.58037027518024 | 9.30069028859620  | 1.81598523864939 |
| H | 6.34457625043256 | 13.96776171977361 | 8.18725787621024 |
| H | 7.45074520521413 | 15.16785021021558 | 8.81483516166505 |
| H | 7.62790921530692 | 14.35570022209389 | 6.15234206138626 |

### **F (cyclopropanation product)**

|   |                   |                   |                  |
|---|-------------------|-------------------|------------------|
| C | 9.06801089929163  | 12.89569950349947 | 7.06200496325230 |
| C | 9.07822690464171  | 11.94748547106910 | 5.87968403898728 |
| C | 10.24617547252105 | 10.94402963992814 | 5.78678089080748 |
| C | 11.60496646166433 | 11.63677712451168 | 5.92832521645196 |
| C | 12.77999257246899 | 10.67745504276137 | 5.73586679772031 |
| C | 12.69685092677459 | 9.95334012839137  | 4.39197344320849 |
| C | 11.35183753046525 | 9.24220733535271  | 4.23553618464377 |
| C | 10.18931016807197 | 10.21512571036104 | 4.43310443265414 |
| O | 10.21875902051791 | 10.00430612017139 | 6.88602188015888 |
| C | 9.18343366941225  | 9.04618387204165  | 6.90878173025994 |
| C | 8.96238548237216  | 12.25327633459813 | 8.44886685890750 |
| C | 8.12870214353017  | 13.19140961362001 | 9.35293862500813 |
| C | 8.17918822135221  | 14.12563195585089 | 7.09012339045782 |
| C | 9.67951064544571  | 14.29289741973073 | 6.99004299265147 |
| C | 10.52199520214037 | 14.84862238071159 | 8.11985558475334 |
| C | 10.16415480245585 | 14.83188503894220 | 5.65595792604983 |
| H | 9.93716968646694  | 12.02252627162895 | 8.88064736892037 |

|   |                   |                   |                   |
|---|-------------------|-------------------|-------------------|
| H | 8.45209250008167  | 11.29755211732532 | 8.33666490790133  |
| H | 8.75547707847032  | 13.68504970082784 | 10.09433188600943 |
| H | 7.38171856404189  | 12.62924376806633 | 9.91529825044485  |
| H | 11.20501238973796 | 14.55994824270632 | 5.46813806815628  |
| H | 10.10766491491102 | 15.92418234973242 | 5.66511576476254  |
| H | 9.56679052693725  | 14.48531717070410 | 4.81423467165447  |
| H | 11.57835978182774 | 14.63754420136378 | 7.93113823837470  |
| H | 10.27994887893724 | 14.43871123242318 | 9.09497112043940  |
| H | 10.41360015328364 | 15.93540582370653 | 8.17864939041708  |
| H | 9.06890755117139  | 12.51458072689108 | 4.94930876223549  |
| H | 8.14015654262990  | 11.38276941552388 | 5.88168709160825  |
| H | 11.65845787340511 | 12.11381758614203 | 6.90737344655910  |
| H | 11.65756127064409 | 12.43089446109688 | 5.18003818827493  |
| H | 13.71910656719402 | 11.23226853130213 | 5.80929950580412  |
| H | 12.77750852359586 | 9.94438372602875  | 6.54559893422076  |
| H | 12.81507434397094 | 10.68046422631250 | 3.57962907272911  |
| H | 13.51724325468340 | 9.23775517647753  | 4.29380162185472  |
| H | 11.28599413927821 | 8.43597164369921  | 4.97110756073809  |
| H | 11.27840065417367 | 8.77689227193781  | 3.24910196541894  |
| H | 9.22955406386532  | 9.70454150191676  | 4.32126334024999  |
| H | 10.21994239126462 | 10.97636859593364 | 3.64781322245807  |
| H | 8.18688419047378  | 9.49526455994942  | 6.84221362708275  |
| H | 9.26361819252948  | 8.53253036733246  | 7.86654059092679  |
| H | 9.28137795301564  | 8.30514755503063  | 6.10861683384653  |
| C | 7.46266077551893  | 14.22933432989630 | 8.42041170658316  |
| H | 6.40641533342698  | 13.99167666103380 | 8.27144890674913  |
| H | 7.50020333555419  | 15.23698512610352 | 8.84263579485737  |
| H | 7.61753844578246  | 14.39802996736518 | 6.20329520474948  |

### **Structures along the reaction profile for Substrate 1b**

**A**

|    |                  |                   |                  |
|----|------------------|-------------------|------------------|
| C  | 5.51063356233800 | 10.97201775108864 | 5.79656156999132 |
| C  | 5.14637112394931 | 12.28366896198720 | 5.35354290602085 |
| C  | 5.21190973073257 | 12.29292758492632 | 3.89896730958321 |
| C  | 5.73220860142848 | 11.06726187482305 | 3.48916401135855 |
| C  | 5.95860590408816 | 10.24631407025859 | 4.67521070546861 |
| C  | 4.45190941914580 | 13.30738241090007 | 6.19055107810845 |
| Ru | 7.34529587101204 | 12.08565729484037 | 4.91220799765479 |
| Cl | 9.03973904335932 | 10.89276563411425 | 3.59267889944834 |

|   |                   |                   |                   |
|---|-------------------|-------------------|-------------------|
| C | 4.73777460422535  | 13.40338703326398 | 3.02044126460325  |
| C | 5.98512816402160  | 10.59909548168446 | 2.09715107790149  |
| C | 6.41460612873246  | 8.82695965877849  | 4.62934826358808  |
| C | 5.37461832089939  | 10.47125762970272 | 7.19642810923597  |
| C | 8.28929700402647  | 11.86270525883844 | 6.53414541974886  |
| C | 8.82485141250684  | 10.49862449705983 | 6.86348115234904  |
| C | 10.34446179410290 | 10.40573517466880 | 7.21212308485581  |
| C | 11.18423370948964 | 11.39188507514088 | 6.39504885900665  |
| C | 12.68771565021152 | 11.20054569633320 | 6.60106458090188  |
| C | 13.11865072387193 | 9.76287739783018  | 6.31215893198540  |
| C | 12.30686683446436 | 8.77456267770443  | 7.15032157367192  |
| C | 10.80978662151010 | 8.97053043731572  | 6.91612410111810  |
| O | 10.59425887415759 | 10.77465071957893 | 8.58796484206141  |
| C | 10.12966165544757 | 9.90841150617161  | 9.59991637480768  |
| C | 8.40791339996585  | 12.84191454049443 | 7.66555722795027  |
| C | 8.75882605947358  | 14.27487700769675 | 7.26943767612362  |
| C | 7.43725446014968  | 14.28392442829455 | 5.08114093727321  |
| C | 8.42591523014863  | 13.82511187036844 | 4.20259302910273  |
| H | 9.12992952427564  | 12.47647133400698 | 8.39770515522570  |
| H | 7.43360903546869  | 12.84290395290547 | 8.17662228831847  |
| H | 9.71665604925190  | 14.28063057569128 | 6.74432477693066  |
| H | 8.90690892573975  | 14.86196391925440 | 8.17916196789572  |
| H | 8.64111405627796  | 9.82247075913202  | 6.03594299983618  |
| H | 8.26948592053408  | 10.11684835031387 | 7.72872925752834  |
| H | 10.90412083985737 | 12.40817795189080 | 6.67351961596807  |
| H | 10.92088421180802 | 11.26187268645996 | 5.34466762426733  |
| H | 13.22934594966367 | 11.89404081321905 | 5.95269889248471  |
| H | 12.94809552467386 | 11.45655888308842 | 7.63132218030165  |
| H | 12.96331669132812 | 9.54381531485862  | 5.25001711967265  |
| H | 14.18685254485048 | 9.63920771196462  | 6.50857315284591  |
| H | 12.54194837744569 | 8.92081890870580  | 8.20864310728985  |
| H | 12.58291484403033 | 7.74607876500545  | 6.90349982996644  |
| H | 10.22195167486239 | 8.25530844455933  | 7.49759767874553  |
| H | 10.58128483761666 | 8.77505823895838  | 5.86572993029939  |
| H | 9.05251776588295  | 9.71628149229698  | 9.53001661187915  |
| H | 10.32682808057188 | 10.40996233955938 | 10.54688059907370 |
| H | 10.65211016179401 | 8.94715121368913  | 9.59842010374084  |
| H | 4.59290140670522  | 14.31436322508234 | 5.80087831389169  |
| H | 4.81203723468849  | 13.29488399009358 | 7.21864413431815  |
| H | 3.37417492993035  | 13.11478973216849 | 6.21573012441763  |

|   |                  |                   |                  |
|---|------------------|-------------------|------------------|
| H | 5.86419746904694 | 11.40445848104787 | 1.37441681246199 |
| H | 5.28555906457338 | 9.80078255657660  | 1.83143956882373 |
| H | 6.99935869262453 | 10.20911026506152 | 2.00305657534049 |
| H | 5.65254228351680 | 8.19314469749741  | 4.16604833444468 |
| H | 6.61119905842082 | 8.43517353413260  | 5.62621316918283 |
| H | 7.32983066117477 | 8.73832418829794  | 4.04215960069047 |
| H | 4.33584268357684 | 10.19086776565326 | 7.39455000591588 |
| H | 5.65161310739301 | 11.22981696239636 | 7.92832188536676 |
| H | 5.99200568551942 | 9.59264485222727  | 7.37118796140332 |
| C | 7.68665387514864 | 14.93058266125828 | 6.41709539448139 |
| H | 6.75026352460200 | 14.95358613773374 | 6.98273908116780 |
| H | 7.95529337350689 | 15.97962531687191 | 6.23887194381649 |
| H | 5.22052492352253 | 13.37615871650180 | 2.04452930213664 |
| H | 4.92718318026043 | 14.38380747024582 | 3.45692002520991 |
| H | 3.65771114883077 | 13.33119284080788 | 2.85913155441912 |
| H | 9.46549561874403 | 13.77964811282410 | 4.49447956252692 |
| H | 6.52728057954659 | 14.64269498437077 | 4.61761863270131 |
| H | 8.26328257927374 | 13.87214017972463 | 3.13306414109225 |

### TS<sub>AB</sub>

|    |                   |                   |                   |
|----|-------------------|-------------------|-------------------|
| C  | 1.59683971374018  | -1.42587516128003 | 1.42829522843098  |
| C  | 1.48857640064423  | -2.02847278599615 | 0.11712057228874  |
| C  | 2.62637006251172  | -1.62114371779822 | -0.63780120113315 |
| C  | 3.38429869144173  | -0.70059304243596 | 0.16082509429742  |
| C  | 2.73735809927640  | -0.61593320126698 | 1.45528412738828  |
| C  | 0.57913919636013  | -3.15471340416298 | -0.26123133254419 |
| Ru | 1.48403094638144  | 0.24624155522106  | -0.32155290249093 |
| Cl | 2.38527968299577  | 2.46854780008284  | 0.10583625577635  |
| C  | 3.01740955270027  | -2.16009061670020 | -1.97411397876924 |
| C  | 4.71406092818374  | -0.10390019181343 | -0.16401889911149 |
| C  | 3.25007137640232  | 0.18215314050382  | 2.60634513126109  |
| C  | 0.71887141166886  | -1.71748452464543 | 2.60289908902798  |
| C  | -0.62638007968587 | 0.85900598106231  | 0.22847265290863  |
| C  | -1.49513035202733 | -0.32455319746746 | 0.60139771449538  |
| C  | -2.96827600376629 | -0.29818039702588 | 0.12167401993244  |
| C  | -3.70642287686066 | 0.99337281712002  | 0.48277762944644  |
| C  | -5.18741301515645 | 0.94934828327307  | 0.10054149026804  |
| C  | -5.89459139761685 | -0.25710764086831 | 0.71826892665715  |
| C  | -5.17509491983154 | -1.55840054000575 | 0.36019455665748  |
| C  | -3.70130157627130 | -1.49366935065725 | 0.75795020067794  |

|   |                   |                   |                   |
|---|-------------------|-------------------|-------------------|
| O | -3.05281839394093 | -0.35075231789591 | -1.31931910379702 |
| C | -2.52487152951283 | -1.48546074329377 | -1.97426257781414 |
| C | -0.67100058688370 | 2.09231599906900  | 1.13199312834395  |
| C | -0.73292807122879 | 3.31158698393129  | 0.18508526397609  |
| C | -0.50221385749587 | 1.26147089751877  | -1.12140914440785 |
| C | 1.41689527407257  | 0.66727760473036  | -2.15398847809067 |
| H | 0.20470457670724  | 2.14299704473222  | 1.77595801285722  |
| H | -1.54714779206248 | 2.04261158293909  | 1.77950593986497  |
| H | 0.03248905652554  | 4.03996588058776  | 0.43922974768499  |
| H | -1.70484206045546 | 3.80283567432387  | 0.26187273817673  |
| H | -1.51276452170717 | -0.41985265678897 | 1.68607047089739  |
| H | -1.06595269429684 | -1.24385448074892 | 0.22060453722786  |
| H | -3.21860651825841 | 1.83284052900170  | -0.01233773137180 |
| H | -3.61165804081489 | 1.15197532915434  | 1.56056788304058  |
| H | -5.67158078604434 | 1.87581648373762  | 0.41941790212037  |
| H | -5.27145733425593 | 0.90293416246446  | -0.98735716464991 |
| H | -5.91481588326175 | -0.14749138595217 | 1.80909544140077  |
| H | -6.93566508123464 | -0.29646947498671 | 0.38821973517592  |
| H | -5.25550238180505 | -1.73116620363151 | -0.71647718303524 |
| H | -5.65320756709537 | -2.40763402950225 | 0.85500295532159  |
| H | -3.18928225174857 | -2.42632071687232 | 0.50862624018166  |
| H | -3.62326571763232 | -1.38723335981162 | 1.84392466007628  |
| H | -1.44046338927295 | -1.57138875811285 | -1.85102936212514 |
| H | -2.74268281149808 | -1.35318056340019 | -3.03366152040630 |
| H | -2.98782354924725 | -2.41886606314516 | -1.64054618623543 |
| H | -0.36438879267033 | -3.12690657326671 | 0.28127816424647  |
| H | 1.04988210068910  | -4.11701082502467 | -0.03331373768794 |
| H | 0.35187052567672  | -3.14880813192980 | -1.32689724056829 |
| H | 5.51907670098706  | -0.67144061384887 | 0.31394282311220  |
| H | 4.76612492599361  | 0.92819503313725  | 0.17901208492973  |
| H | 4.89502504357850  | -0.10206954045254 | -1.23819385989430 |
| H | 2.51651519530579  | 0.23867625146229  | 3.40962712699227  |
| H | 3.48646196710300  | 1.19916328540844  | 2.29205220312672  |
| H | 4.15951078575321  | -0.27052261676195 | 3.01309424775823  |
| H | 1.22120127968956  | -2.41785832070255 | 3.27690384137689  |
| H | -0.22244235018099 | -2.17342109641109 | 2.30633279127466  |
| H | 0.49295003454504  | -0.81844052991718 | 3.17618803917556  |
| C | -0.51761881901586 | 2.77159305492591  | -1.24895018047575 |
| H | -1.34363377368244 | 3.04124204465736  | -1.91249549437324 |
| H | 0.39387117846298  | 3.17325240586902  | -1.68465848849134 |

|   |                   |                   |                   |
|---|-------------------|-------------------|-------------------|
| H | 3.58703459077096  | -3.08710514074563 | -1.86020719371630 |
| H | 3.63886950621049  | -1.45359541991369 | -2.52296739625787 |
| H | 2.14554620801619  | -2.38547204187877 | -2.58896088060901 |
| H | 1.48878846565436  | 1.66975721372765  | -2.57672783789198 |
| H | -0.96907288288270 | 0.67586993865681  | -1.89614970160679 |
| H | 1.37683304915351  | -0.10599151697849 | -2.92941348049816 |

**B**

|    |                   |                   |                   |
|----|-------------------|-------------------|-------------------|
| C  | 1.59948505368500  | -1.42653704747629 | 1.37303363450968  |
| C  | 1.52505179541602  | -1.96924406981409 | 0.02422964089581  |
| C  | 2.74664011548032  | -1.62564433177177 | -0.64596950710290 |
| C  | 3.45784347232467  | -0.71638491550409 | 0.19941588420085  |
| C  | 2.75407387213503  | -0.66346369430950 | 1.47626671971719  |
| C  | 0.59278318373438  | -3.05341026907165 | -0.41906814941862 |
| Ru | 1.62335408263966  | 0.21486745042010  | -0.51061601782619 |
| Cl | 2.42475633186094  | 2.35698150469964  | 0.20848419035508  |
| C  | 3.26239210696586  | -2.25354595729148 | -1.89653932930860 |
| C  | 4.82312492170592  | -0.15817032020820 | -0.02960725530185 |
| C  | 3.23053283139215  | 0.09895924365520  | 2.66366130355608  |
| C  | 0.64561976941324  | -1.71918005532257 | 2.48638450523026  |
| C  | -0.89114654971180 | 1.05723190000033  | 0.14573615913204  |
| C  | -1.60388457800681 | -0.18534846113166 | 0.58796845167644  |
| C  | -3.09374017178533 | -0.26173675219224 | 0.16661465191534  |
| C  | -3.88883474082745 | 0.97271516939976  | 0.60155179690867  |
| C  | -5.38199556816212 | 0.84555301900678  | 0.29491698536574  |
| C  | -5.97872043167428 | -0.41991568589170 | 0.91131743842034  |
| C  | -5.20169785940442 | -1.66284087895313 | 0.47446569811147  |
| C  | -3.71519664470198 | -1.51972861720306 | 0.79828712459082  |
| O  | -3.22589729134547 | -0.27514489715936 | -1.26586245061087 |
| C  | -2.67127428109742 | -1.36607653454008 | -1.97216622301191 |
| C  | -0.77948913024124 | 2.26632687969369  | 1.05224705530861  |
| C  | -0.65522196252033 | 3.47079753330920  | 0.08838916330365  |
| C  | -0.62820678062480 | 1.39475026339635  | -1.14183995796689 |
| C  | 1.73691599977573  | 0.44446725155509  | -2.34656339104636 |
| H  | 0.09176293351689  | 2.18310874860210  | 1.70366826297225  |
| H  | -1.65901545493132 | 2.33916728985769  | 1.69500148923987  |
| H  | 0.15586977363937  | 4.13123940639992  | 0.38300441361242  |
| H  | -1.58146334695357 | 4.04820592785518  | 0.09355009715740  |
| H  | -1.56605102439825 | -0.26541027363997 | 1.67344763787069  |
| H  | -1.11140164139024 | -1.06635345339445 | 0.19145027536314  |

|   |                   |                   |                   |
|---|-------------------|-------------------|-------------------|
| H | -3.47652800610490 | 1.84994458514204  | 0.10148557859114  |
| H | -3.74436028612761 | 1.11110012671988  | 1.67718595986418  |
| H | -5.90593342625611 | 1.73042619312104  | 0.66493341936413  |
| H | -5.51961112162834 | 0.82239803364111  | -0.78833471562017 |
| H | -5.94610678989767 | -0.34253794359206 | 2.00463201954794  |
| H | -7.03183698355396 | -0.51565621293633 | 0.63551984038796  |
| H | -5.32792356256829 | -1.80729917818043 | -0.60198626050585 |
| H | -5.60132370895673 | -2.55459094010853 | 0.96399914669998  |
| H | -3.16191132235312 | -2.40943563770925 | 0.48761877147684  |
| H | -3.58536898624734 | -1.44469470123777 | 1.88205322826634  |
| H | -1.58893835793610 | -1.44926121868104 | -1.83385849372256 |
| H | -2.86914371573488 | -1.17567061466892 | -3.02640739290946 |
| H | -3.13343471411949 | -2.32036679218158 | -1.70043800015478 |
| H | -0.40259474004663 | -2.94541989995298 | 0.00931135529583  |
| H | 0.96941847700123  | -4.03433898493652 | -0.10908999349944 |
| H | 0.48745628522841  | -3.06669063948967 | -1.50289156301622 |
| H | 5.57853865771764  | -0.76370941557643 | 0.48196158690832  |
| H | 4.88700797942480  | 0.86219912436820  | 0.34521597822507  |
| H | 5.06833636281467  | -0.13650841681450 | -1.09026471787903 |
| H | 2.52511854858366  | 0.03456743680254  | 3.49097645372405  |
| H | 3.36799822640883  | 1.15185124345439  | 2.40891745668454  |
| H | 4.19259630631862  | -0.29087419443117 | 3.00834496637894  |
| H | 1.08912277700689  | -2.44260924995804 | 3.17699934712617  |
| H | -0.28358502109997 | -2.14980480239695 | 2.12220624235126  |
| H | 0.40173280576970  | -0.82613016967600 | 3.06221652270113  |
| C | -0.40982516425582 | 2.87341863117390  | -1.32267760911621 |
| H | -1.12358987031502 | 3.25782227012445  | -2.05689886230584 |
| H | 0.59024199779628  | 3.10331715997109  | -1.69209800459267 |
| H | 3.76468111039336  | -3.19551588075758 | -1.65757261086167 |
| H | 3.98710874624693  | -1.61519862765344 | -2.40003381522263 |
| H | 2.46066652947643  | -2.47242176909191 | -2.60166116210036 |
| H | 1.21544338020420  | 1.20866204837157  | -2.92956631286238 |
| H | -0.84344246850954 | 0.74682444923227  | -1.97468268649682 |
| H | 2.39896226941155  | -0.15564038506709 | -2.97477797054738 |

**C (secondary carbene)**

|   |                  |                   |                  |
|---|------------------|-------------------|------------------|
| C | 5.81715427290330 | 10.63589447170751 | 5.38659121838532 |
| C | 5.26807890654660 | 11.82929575189100 | 4.92047669121193 |
| C | 5.53213268611139 | 11.94067729971136 | 3.48883774929500 |
| C | 6.23249828764787 | 10.75917500631773 | 3.08371261274110 |

|    |                  |                   |                  |
|----|------------------|-------------------|------------------|
| C  | 6.52039781738501 | 10.01285383396162 | 4.28342194235631 |
| Ru | 7.51532524517857 | 11.92229723896645 | 4.34222230608742 |
| C  | 8.56794623562642 | 12.55325742229618 | 2.96096648859865 |
| H  | 8.69012460303232 | 13.63497840142994 | 2.81646630228630 |
| C  | 4.54045798627684 | 12.86110700484955 | 5.71319191298518 |
| C  | 4.95062855441360 | 12.98526962366244 | 2.59503171480679 |
| C  | 6.54092418521844 | 10.32809805238843 | 1.68989367155230 |
| C  | 7.22338931689238 | 8.70076743563932  | 4.35949954806383 |
| C  | 5.85412748667319 | 10.13520027367212 | 6.79115327692781 |
| Cl | 8.81489977647764 | 11.97766990019434 | 6.27315929742603 |
| H  | 9.00489857842326 | 11.97215621373025 | 2.14670383422927 |
| H  | 5.51350102145173 | 13.06421173261406 | 1.66584685986539 |
| H  | 4.96048619283149 | 13.96473913269258 | 3.07275854550279 |
| H  | 3.91186894889374 | 12.74892505996729 | 2.34211333664120 |
| H  | 7.93356765480408 | 8.58423732058098  | 3.54284523041362 |
| H  | 6.50139338298885 | 7.87906006751945  | 4.30124257060204 |
| H  | 7.76822212145545 | 8.60568329629188  | 5.29745651861604 |
| H  | 5.45939662054383 | 9.11777637550295  | 6.84575777939996 |
| H  | 5.25945195321583 | 10.76194569300580 | 7.45284834063216 |
| H  | 6.87704403031755 | 10.12623855068971 | 7.17322081142691 |
| H  | 3.46328759801062 | 12.79481419440729 | 5.53209451003870 |
| H  | 4.85885457081813 | 13.86490641313457 | 5.43068246951923 |
| H  | 4.71506723986209 | 12.74387095411387 | 6.78049134395937 |
| H  | 7.47083760183703 | 9.76192333244739  | 1.64591275258262 |
| H  | 6.64066301053338 | 11.18413895588573 | 1.02323420885667 |
| H  | 5.74261111362900 | 9.68902399072763  | 1.30107815498984 |

### TS<sub>AD</sub>

|    |                  |                   |                   |
|----|------------------|-------------------|-------------------|
| C  | 4.04825173727285 | 0.74493892977234  | -0.34241425341548 |
| C  | 3.24609079641937 | 0.83167153725514  | -1.50959021687710 |
| C  | 2.00326378074791 | 1.52811857981124  | -1.19371141313576 |
| C  | 2.01619619646792 | 1.76823299498409  | 0.19963862822237  |
| C  | 3.26817038383364 | 1.24187250930639  | 0.71929769291646  |
| Ru | 1.96587694611011 | -0.44347186258115 | -0.26714336578343 |
| Cl | 2.92302591684791 | -2.53288005399914 | -0.73923272516905 |
| C  | 3.63375690200734 | 0.36722553342544  | -2.87417449688323 |
| C  | 1.04663038052801 | 2.06595469160006  | -2.20440384259982 |
| C  | 1.07711725612928 | 2.62644616935113  | 0.97756640657311  |
| C  | 3.71060474363756 | 1.34607743037735  | 2.13930711947047  |
| C  | 5.39073856785688 | 0.09947251935822  | -0.26042847013753 |



|   |                   |                   |                   |
|---|-------------------|-------------------|-------------------|
| C | -0.32087899986681 | -2.48016093689868 | -0.91127214834518 |
| C | -0.54767847896638 | -3.54393714618573 | 0.17794242062910  |
| C | 0.29482843305771  | -3.07391549988085 | 1.36875455595942  |
| C | 0.18795913045980  | -1.54539142457195 | 1.33913549398659  |
| C | -0.02349498025692 | -1.15359681931869 | -0.16615351967990 |
| C | -1.02560825130043 | -0.02350933732597 | -0.42172894574276 |
| C | -2.52469233130274 | -0.07937526429236 | -0.00972232265603 |
| C | -3.30848225582514 | -1.24607926303446 | -0.61821625686402 |
| C | -4.80962089934787 | -1.17487311153952 | -0.32735579036898 |
| C | -5.41695209722880 | 0.15080751666859  | -0.78162004411890 |
| C | -4.66471746106714 | 1.32839885208746  | -0.16242299678811 |
| C | -3.17114084083516 | 1.24378879195626  | -0.47203526091686 |
| C | 1.43139611596621  | -0.78109334053792 | 1.74072199956147  |
| H | 1.23312482647174  | 0.11919945086127  | 2.31028088594489  |
| O | -2.69482663684603 | -0.25925075041523 | 1.41694965027487  |
| C | -2.26280898213398 | 0.77940344591446  | 2.26743316194632  |
| H | 2.24042791577221  | -1.36078544845055 | 2.18210415273518  |
| H | 0.50944547372252  | -2.78230547609734 | -1.54331586476807 |
| H | -1.18640390748622 | -2.37437688695135 | -1.56393497290086 |
| H | -0.27133903786682 | -4.54574927456478 | -0.15568164480743 |
| H | -1.60152733500091 | -3.57627459822062 | 0.46657364817193  |
| H | -1.02920273426357 | 0.17938084599737  | -1.49606217944148 |
| H | -0.63799090109445 | 0.88394706132455  | 0.03707339019161  |
| H | -2.90982027384670 | -2.18142146597932 | -0.23352948883791 |
| H | -3.14398706134515 | -1.24134971747215 | -1.69956780729844 |
| H | -5.31199094650176 | -2.01126942728762 | -0.82040832842507 |
| H | -4.96723321184010 | -1.29693711011880 | 0.74672325861264  |
| H | -5.36064979135515 | 0.22282757277422  | -1.87443404477084 |
| H | -6.47693428733022 | 0.19542662821587  | -0.51831786991634 |
| H | -4.81740274636265 | 1.32158632815985  | 0.92036357248024  |
| H | -5.06429779054838 | 2.27639101614384  | -0.53272265123339 |
| H | -2.63750218896065 | 2.09187605925868  | -0.03530087399218 |
| H | -3.02413744068670 | 1.31967160731250  | -1.55343736084776 |
| H | -2.84630011178935 | 1.69695572181969  | 2.14006508316939  |
| H | -1.20462434884184 | 1.02015169070964  | 2.13192711246906  |
| H | -2.40488875673754 | 0.41998479590101  | 3.28645065366899  |
| H | 0.08394461300415  | 2.30642370212662  | -1.75978962905786 |
| H | 0.87155918454828  | 1.35177101919331  | -3.00921552984742 |
| H | 1.44831476700465  | 2.97897702769052  | -2.65589300692936 |
| H | 2.86873602906052  | 1.42430908648470  | 2.82324446175666  |

|   |                   |                   |                   |
|---|-------------------|-------------------|-------------------|
| H | 4.32194690764327  | 2.24423632364181  | 2.26855203422052  |
| H | 4.31174090340270  | 0.48855397490084  | 2.43817505925634  |
| H | 6.13471276843383  | 0.66994483008500  | -0.82263179756146 |
| H | 5.35725180044382  | -0.91273741787299 | -0.66874767217573 |
| H | 5.73446032645880  | 0.03062433137111  | 0.77026248587128  |
| H | 2.77539066618115  | -0.02508622215344 | -3.42048297756365 |
| H | 4.38561545627322  | -0.41712173206045 | -2.82579259835930 |
| H | 4.03738843608527  | 1.20322192266208  | -3.45472970351292 |
| H | -0.05247954646955 | -3.48174638581844 | 2.32010409257493  |
| H | 1.33126641305484  | -3.38164735919119 | 1.23033985052053  |
| H | 1.54100277826153  | 3.59154797898949  | 1.20312697957143  |
| H | 0.80141946354527  | 2.17260667952642  | 1.93041052694010  |
| H | 0.16081259861792  | 2.82327034695910  | 0.42500806401708  |
| H | -0.67285298202308 | -1.22895017115694 | 1.92808863001659  |

## D

|    |                   |                   |                   |
|----|-------------------|-------------------|-------------------|
| C  | 3.96217071673959  | 0.42394004728533  | -0.76949204589818 |
| C  | 2.98234809246162  | 0.75073474923770  | -1.71971412849284 |
| C  | 1.94096686196876  | 1.48126334857822  | -1.05564678325686 |
| C  | 2.30188203823177  | 1.63155566275723  | 0.32486573375976  |
| C  | 3.53396776643228  | 0.91903007901496  | 0.52351645655794  |
| Ru | 1.97766418225372  | -0.50435044766616 | 0.05173378021147  |
| Cl | 3.34142381144055  | -2.46576941658097 | 0.44897252942869  |
| C  | 3.01518859852450  | 0.44217128462329  | -3.18078274680559 |
| C  | 0.88479107468934  | 2.25111665539159  | -1.78097452161162 |
| C  | 1.64143156234417  | 2.53376775062446  | 1.31403474773289  |
| C  | 4.35461304746450  | 0.87269534221007  | 1.76995344041099  |
| C  | 5.25494790770118  | -0.26802494471775 | -1.03021226544237 |
| C  | 0.15179677689577  | -1.87262332048931 | -0.53020502250912 |
| C  | 0.01697997763575  | -3.16309787231779 | 0.29684855403051  |
| C  | -0.41581110435711 | -2.69647270426987 | 1.70598037732106  |
| C  | -0.10000745517068 | -1.19643423433078 | 1.78503642989656  |
| C  | -0.14389417648316 | -0.70534841726737 | 0.33664480645156  |
| C  | -1.12438830370084 | 0.34086240829976  | -0.11747707270063 |
| C  | -2.63609653786861 | 0.03396048521090  | 0.03719420429989  |
| C  | -3.03938872344078 | -1.27212788191780 | -0.65458748642914 |
| C  | -4.55030847195643 | -1.51015579932921 | -0.63266015016823 |
| C  | -5.31775188690225 | -0.33368775203893 | -1.23447534558773 |
| C  | -4.93958403617205 | 0.97592985795780  | -0.54174475905698 |
| C  | -3.42855031543434 | 1.19928083369808  | -0.58459019342994 |

|   |                   |                   |                   |
|---|-------------------|-------------------|-------------------|
| C | 1.35002022684346  | -0.85246925664346 | 2.06235036969862  |
| H | 1.45670805692533  | 0.07440527518308  | 2.62121028410254  |
| O | -3.00532473975579 | -0.17023750054124 | 1.41504082761778  |
| C | -2.90569309370273 | 0.93181143263874  | 2.29201011449246  |
| H | 1.94978308462980  | -1.63996909722145 | 2.50948961960348  |
| H | 1.25312992069039  | -1.82892700564760 | -0.96210071419209 |
| H | -0.37904491984838 | -1.85931051541232 | -1.48097183646811 |
| H | 0.96327966407060  | -3.69815968447396 | 0.32551339462724  |
| H | -0.72508732284952 | -3.82284808240762 | -0.15517908218738 |
| H | -0.96435369688635 | 0.54892858497988  | -1.17422052651936 |
| H | -0.93083650748177 | 1.27687070803900  | 0.40815280508336  |
| H | -2.52858388966714 | -2.10352312086546 | -0.17147468873029 |
| H | -2.68921103420927 | -1.23268068894878 | -1.69076375677001 |
| H | -4.78026127694205 | -2.43084626288127 | -1.17491535129709 |
| H | -4.86804255117756 | -1.66089403227550 | 0.40139920965580  |
| H | -5.08475742961885 | -0.25499451415780 | -2.30314999053870 |
| H | -6.39450984709027 | -0.50507543110738 | -1.16036562819695 |
| H | -5.27610807502313 | 0.94278028926741  | 0.49799007192053  |
| H | -5.44981279335620 | 1.81953424343743  | -1.01365444411173 |
| H | -3.15941577044638 | 2.13840326833887  | -0.09498087231990 |
| H | -3.10823926329736 | 1.29872328304245  | -1.62604845871940 |
| H | -3.61487690381972 | 1.72810076956061  | 2.04477623454891  |
| H | -1.89742644693856 | 1.35772603232080  | 2.32034189574582  |
| H | -3.14414448558895 | 0.55316793846963  | 3.28518978315833  |
| H | 0.11239970698345  | 2.62201767970758  | -1.11357537716059 |
| H | 0.40522195723764  | 1.65975557870338  | -2.56107270983797 |
| H | 1.34264813943516  | 3.11791528306221  | -2.26833397304558 |
| H | 3.74214545064455  | 1.04738051534801  | 2.65271576662946  |
| H | 5.14061161842474  | 1.63405978663718  | 1.74935374909858  |
| H | 4.82581154513261  | -0.10295994817930 | 1.88350770368880  |
| H | 6.05025516053695  | 0.47495836865975  | -1.14943318372688 |
| H | 5.21433865997453  | -0.86948525399497 | -1.93652046485696 |
| H | 5.51901144877731  | -0.92986522278292 | -0.20905349720604 |
| H | 2.01534439783106  | 0.24204800719177  | -3.5666555421628  |
| H | 3.63559176977206  | -0.42783700230220 | -3.38977322410114 |
| H | 3.42125084496358  | 1.28505662226279  | -3.74940839237906 |
| H | -1.49097267977471 | -2.83802692286903 | 1.83369925301181  |
| H | 0.08722943486841  | -3.25621731578646 | 2.49577486685816  |
| H | 2.04221914160969  | 3.54848240450281  | 1.22798873442954  |
| H | 1.81110446217011  | 2.20005172860441  | 2.33589919193747  |

|   |                   |                   |                  |
|---|-------------------|-------------------|------------------|
| H | 0.56528090038847  | 2.59005366395284  | 1.15693589064217 |
| H | -0.80143026773250 | -0.69269031937538 | 2.44583842131856 |

**TS<sub>DE</sub>**

|    |                   |                   |                   |
|----|-------------------|-------------------|-------------------|
| C  | 3.42357070017775  | 0.66290377624142  | -0.89240410651079 |
| C  | 2.42135297926154  | 0.91441505709733  | -1.86428776296693 |
| C  | 1.41741621173325  | 1.77185566461772  | -1.28718706452556 |
| C  | 1.79420596062369  | 2.02036350553891  | 0.06876369251474  |
| C  | 3.01859939696761  | 1.31331915911804  | 0.33514744575386  |
| Ru | 1.52039090042022  | -0.12129209624570 | -0.13654528103290 |
| Cl | 2.71050843246926  | -2.11497359321287 | 0.71949300683618  |
| C  | 2.42477467971554  | 0.43994847850541  | -3.28038222169994 |
| C  | 0.34643198045124  | 2.46965282384337  | -2.06019950666573 |
| C  | 1.11076827712286  | 2.94710288763764  | 1.01828386509896  |
| C  | 3.81139708288636  | 1.34399740934349  | 1.59932793594274  |
| C  | 4.69147641309551  | -0.09574985343120 | -1.09000968060207 |
| C  | -0.26475350486896 | -1.63992071635971 | -0.75218485701793 |
| C  | -0.40962428921058 | -3.03437092409838 | -0.11811318438826 |
| C  | -0.60625298190796 | -2.81276289049199 | 1.40244635045125  |
| C  | -0.90108103998888 | -1.32292748781923 | 1.59433615681565  |
| C  | -0.69375175215310 | -0.63150307004107 | 0.28379155251198  |
| C  | -1.58138133288850 | 0.52733172429792  | -0.10980794797246 |
| C  | -3.10994486385279 | 0.32393718015667  | -0.01000202094765 |
| C  | -3.55923581640461 | -1.00494691087368 | -0.62466970400653 |
| C  | -5.08100148380409 | -1.15824678707692 | -0.64805498244062 |
| C  | -5.75534141179269 | 0.01492472828847  | -1.35956745875736 |
| C  | -5.32690154433126 | 1.34917508617772  | -0.74643358494903 |
| C  | -3.80490729479201 | 1.48436948714879  | -0.74530939778362 |
| C  | 0.27604494815830  | -0.42823241544433 | 1.83173038268187  |
| H  | 0.03959017288234  | 0.54017182312622  | 2.25160034605733  |
| O  | -3.55461695060582 | 0.24521525675653  | 1.36193731666164  |
| C  | -3.39100599980176 | 1.38541676292864  | 2.17910955862916  |
| H  | 1.17016403568522  | -0.89945716160284 | 2.21480290441319  |
| H  | 0.80416684524905  | -1.53398074617052 | -1.15819085711579 |
| H  | -0.84827973087120 | -1.50291928427693 | -1.66168220824016 |
| H  | 0.46005534183745  | -3.65551907589978 | -0.31820686217403 |
| H  | -1.28308871865400 | -3.52435326571671 | -0.55286686125397 |
| H  | -1.35776727670474 | 0.78754497285024  | -1.14086848925441 |
| H  | -1.32195474608555 | 1.40686647416522  | 0.47664672789920  |
| H  | -3.10936817250876 | -1.82545683641027 | -0.06557027762998 |

|   |                   |                   |                   |
|---|-------------------|-------------------|-------------------|
| H | -3.17023839110982 | -1.05663636660478 | -1.64618059964933 |
| H | -5.34406844067662 | -2.09978414729787 | -1.13655459326709 |
| H | -5.44573068055544 | -1.21869227479583 | 0.37954616438032  |
| H | -5.48064646976237 | 0.00341082916792  | -2.42107731336673 |
| H | -6.84216692278545 | -0.09022587983483 | -1.31651670289114 |
| H | -5.70132160407632 | 1.41147092474648  | 0.27885306381064  |
| H | -5.77006833158933 | 2.18235595633039  | -1.29762800514010 |
| H | -3.49730569062978 | 2.44040720709960  | -0.31422298482923 |
| H | -3.44191595124152 | 1.48752931896315  | -1.77725999350377 |
| H | -3.97856267473415 | 2.23982036704333  | 1.82879412140590  |
| H | -2.34439857258651 | 1.69449163743199  | 2.26779736453082  |
| H | -3.74853831665629 | 1.10329171320574  | 3.16856516756878  |
| H | -0.43452240364880 | 2.86366250866856  | -1.41299122204678 |
| H | -0.12411658681405 | 1.81104794355427  | -2.79145944832372 |
| H | 0.77098485331851  | 3.31435759111883  | -2.61278713843732 |
| H | 3.17947692718895  | 1.57706968780021  | 2.45594629451666  |
| H | 4.60107811379554  | 2.10080263432092  | 1.55034804901497  |
| H | 4.27508625207524  | 0.37601182463033  | 1.78466479505698  |
| H | 5.51964258470710  | 0.59617155585375  | -1.27391159865199 |
| H | 4.62171821159263  | -0.77340192973051 | -1.93947088626087 |
| H | 4.92604345892149  | -0.69794601826041 | -0.21483241959864 |
| H | 1.41140483585337  | 0.25953233985968  | -3.64015298233978 |
| H | 2.98861498419886  | -0.48529759682996 | -3.38705512542926 |
| H | 2.87939220781979  | 1.18803061905250  | -3.93762012689946 |
| H | -1.43260802019051 | -3.41381476068246 | 1.78319177656668  |
| H | 0.29395901008557  | -3.10280543326937 | 1.94200636709543  |
| H | 1.56098422226275  | 3.94312500897146  | 0.96676545559815  |
| H | 1.19955235009080  | 2.60174588637240  | 2.04771038218480  |
| H | 0.05145802163008  | 3.05499495249673  | 0.78846104450549  |
| H | -1.81040842399361 | -1.08447324204982 | 2.12790317006758  |

## E

|   |                  |                   |                   |
|---|------------------|-------------------|-------------------|
| C | 1.76742685591091 | 1.52590755267973  | 14.28160782930861 |
| C | 2.76460917312780 | 2.23110572806247  | 13.38285505625989 |
| H | 3.36812499433499 | 2.89593976718855  | 14.00394122491218 |
| H | 2.18890981616921 | 2.88802882565796  | 12.72146366630564 |
| C | 3.69735077489380 | 1.46134526717959  | 12.44155913789019 |
| C | 4.54451747582798 | 0.38435376566858  | 13.12723458256702 |
| H | 5.12200709608727 | -0.14693202992893 | 12.36743133720092 |
| H | 3.91450717428539 | -0.35422418496597 | 13.61657288884124 |

|    |                   |                   |                   |
|----|-------------------|-------------------|-------------------|
| C  | 5.54209728590896  | 1.00114194438751  | 14.11334958986970 |
| C  | 6.47951808780706  | 1.97869770450927  | 13.40243447577337 |
| H  | 7.16136266173521  | 2.44226895179214  | 14.11934115761431 |
| H  | 7.10147636037830  | 1.42075585750763  | 12.69349654840217 |
| C  | 5.69702317786649  | 3.05343326461064  | 12.64608831164087 |
| H  | 6.37802186015743  | 3.66969165554215  | 12.05376972663360 |
| H  | 5.22023670167100  | 3.72886803176793  | 13.36131872093658 |
| C  | 4.63838924434885  | 2.44008932372791  | 11.72411774860814 |
| H  | 4.03784864154140  | 3.21574276143499  | 11.25567400832049 |
| H  | 5.14608542129836  | 1.90060702200276  | 10.92014787762687 |
| C  | 3.30285203085455  | -0.12822960992526 | 10.56869711914283 |
| H  | 2.47664539369051  | -0.41141707284660 | 9.92449297230816  |
| H  | 3.62478039769195  | -1.00892333955850 | 11.12353555457831 |
| H  | 4.13009713858960  | 0.25569091815496  | 9.96648138703675  |
| C  | 1.30300835204160  | 4.12836843210767  | 10.27381013963722 |
| C  | -0.06935453964079 | 3.83135475917520  | 10.59527277149937 |
| C  | -0.61438539312811 | 2.98417812877266  | 9.57164757100271  |
| C  | 0.45126669833395  | 2.69495262127784  | 8.65048962012025  |
| C  | 1.63326554483059  | 3.40665958153220  | 9.08805343976388  |
| C  | 2.14655132330715  | 5.13990310080548  | 10.97966304689839 |
| H  | 2.05641778781334  | 5.06660750852868  | 12.06375581523904 |
| H  | 1.83998716254896  | 6.15162614504973  | 10.69490961819555 |
| H  | 3.20049595142062  | 5.03936903829036  | 10.72630386441069 |
| C  | -0.82575289565856 | 4.40144011241846  | 11.74773655346501 |
| H  | -1.60069618873481 | 3.71686226851693  | 12.09009737297576 |
| H  | -1.31160875042056 | 5.34008912589379  | 11.46040609080686 |
| H  | -0.16822070984427 | 4.61291929094697  | 12.59003353260193 |
| C  | 2.93679635605379  | 3.43366166282540  | 8.36070771725932  |
| H  | 3.76328612409435  | 3.67631553978011  | 9.02678924534300  |
| H  | 2.92206096647853  | 4.18088969952661  | 7.56050624303943  |
| H  | 3.15284471526402  | 2.46757777094450  | 7.90401879117844  |
| Cl | -0.10580753059952 | -0.09692632623297 | 10.90534110811723 |
| O  | 2.78861996899084  | 0.87443389650574  | 11.44843353795468 |
| Ru | 0.96908651948945  | 1.97893483609123  | 10.54768895876565 |
| C  | -2.02350219000963 | 2.50573902299860  | 9.47218726592001  |
| H  | -2.06977029540519 | 1.51351146440772  | 9.02683342765569  |
| H  | -2.62428288466411 | 3.18841927060678  | 8.86271688081790  |
| H  | -2.48384340469878 | 2.43490982207372  | 10.45672760456576 |
| C  | 0.33871186461703  | 1.86047636184748  | 7.41930342755707  |
| H  | 1.28907837104866  | 1.38655393357739  | 7.17384269882294  |

|   |                   |                   |                   |
|---|-------------------|-------------------|-------------------|
| H | 0.03992364005796  | 2.47420528778680  | 6.56269592221786  |
| H | -0.40198490193222 | 1.07313086166598  | 7.54778508287439  |
| C | 0.72896811053000  | 2.47129928982263  | 14.88002877418246 |
| C | 0.14046970844508  | 1.74345073562197  | 16.10052167748638 |
| H | -0.03626519318284 | 2.74849341247390  | 14.15213568012275 |
| H | 1.23211028209807  | 3.39330014627263  | 15.19295505904538 |
| C | 1.26991256443005  | 0.81819427237959  | 16.59363928841395 |
| H | -0.72519292741062 | 1.15125858136730  | 15.80234436968289 |
| H | -0.19973433080702 | 2.43423640047123  | 16.87259433525311 |
| C | 2.06526270813430  | 0.48702241374715  | 15.34572350703286 |
| H | 0.88299861342597  | -0.06791858310621 | 17.10315700673194 |
| H | 1.91366334585887  | 1.34612012352290  | 17.30417429204649 |
| C | 1.29528358722952  | 0.11084761876285  | 14.10469711320295 |
| H | 3.06106225093504  | 0.08604291300813  | 15.47368663234608 |
| H | 0.23585312643162  | -0.09556892574236 | 14.17031339723748 |
| H | 1.78973661371204  | -0.48465911482857 | 13.35505180527361 |
| H | 6.11901447880237  | 0.20238242900891  | 14.58521504568412 |
| H | 5.00820663553620  | 1.51416296484733  | 14.91704674577333 |

### **F (cyclopropanation product)**

|   |                   |                   |                  |
|---|-------------------|-------------------|------------------|
| C | 9.28396508627056  | 13.43542430886715 | 6.11370463450151 |
| C | 9.27271790087579  | 11.93511622634349 | 5.94170571115377 |
| C | 10.29732866152581 | 11.12714274544055 | 6.75973114245339 |
| C | 11.72619257617962 | 11.63331328977269 | 6.53261020605630 |
| C | 12.77648819489322 | 10.77435664904081 | 7.23795380122389 |
| C | 12.66431539004286 | 9.30345395574345  | 6.83765966433309 |
| C | 11.24905248270378 | 8.77842469923844  | 7.08234624930333 |
| C | 10.21187119471596 | 9.64272933245184  | 6.36573280480406 |
| O | 10.08499309168899 | 11.30613241106234 | 8.17865527714033 |
| C | 8.91985565229578  | 10.74597853826815 | 8.74544327857603 |
| C | 8.92233860687383  | 14.04234835638162 | 7.46431603420635 |
| C | 8.50376618371762  | 15.49447526230886 | 7.16749326905151 |
| C | 8.67580630347154  | 14.33245070017928 | 5.05495525199251 |
| C | 10.17054136852895 | 14.27846045047489 | 5.22988907794280 |
| H | 9.73165779750627  | 13.97567124051224 | 8.19132034585159 |
| H | 8.07719190384947  | 13.48471825227657 | 7.87829056150715 |
| H | 9.37311668258981  | 16.15278525745195 | 7.20799495849229 |
| H | 7.78701723146079  | 15.87683799256290 | 7.89491497890872 |
| H | 9.44239624412835  | 11.70210867052127 | 4.88691622718194 |
| H | 8.26949063882483  | 11.55767250292920 | 6.16784725876699 |

|   |                   |                   |                  |
|---|-------------------|-------------------|------------------|
| H | 11.79063238556575 | 12.66662126126688 | 6.87302685114863 |
| H | 11.91808786458624 | 11.63931951285069 | 5.45530064787464 |
| H | 13.77444194445824 | 11.15550391816797 | 7.00599445054145 |
| H | 12.64233501977952 | 10.86731147135018 | 8.31813682402283 |
| H | 12.90877184924049 | 9.19575816975700  | 5.77408136266117 |
| H | 13.39208742790566 | 8.70254748121836  | 7.38900834317497 |
| H | 11.04790924937832 | 8.77880084357795  | 8.15718656970284 |
| H | 11.16177364600095 | 7.74251115580306  | 6.74447032794307 |
| H | 9.20152786319020  | 9.26590082241031  | 6.54299342356673 |
| H | 10.37361994550387 | 9.57826089505297  | 5.28550956002426 |
| H | 8.00672296025692  | 11.05028197485061 | 8.22464484190450 |
| H | 8.86932949281159  | 11.11671315754407 | 9.76885890694780 |
| H | 8.95516713411770  | 9.65173287537340  | 8.77367308680560 |
| C | 7.93004268035763  | 15.46218691106908 | 5.73697985404661 |
| H | 6.86215337022145  | 15.22541083863920 | 5.75901537577669 |
| H | 8.03952019750209  | 16.42202642341242 | 5.22601550353483 |
| H | 10.68586148466370 | 15.13313479050890 | 5.65044511619758 |
| H | 8.25491137559491  | 13.89991879518808 | 4.15551150419712 |
| H | 10.73570091672076 | 13.75897786013104 | 4.46771671648104 |

### **Structures along the reaction profile for Substrate 1f**

**A**

|    |                   |                   |                  |
|----|-------------------|-------------------|------------------|
| C  | 10.82323668992533 | 9.07665202699176  | 6.88778408035944 |
| C  | 10.33761538961795 | 10.49161243627684 | 7.24282962844737 |
| C  | 11.19264284980249 | 11.52369418112835 | 6.50156440443287 |
| C  | 12.69120802923316 | 11.33159514071261 | 6.74125125767460 |
| C  | 13.14184187964863 | 9.91384402809734  | 6.39091649723219 |
| C  | 12.31468394815987 | 8.87842989336561  | 7.15373917348760 |
| C  | 8.82516429234171  | 10.58778412529259 | 6.86093006997228 |
| C  | 8.28174036443541  | 11.95796072578059 | 6.56776817588434 |
| C  | 8.38443943755125  | 12.89371158318133 | 7.73446434763999 |
| C  | 8.70925010583332  | 14.34149836608146 | 7.37802705181867 |
| C  | 7.60490622225591  | 14.99433890119468 | 6.56826357039403 |
| C  | 7.31802067746677  | 14.36557540704287 | 5.23004010129885 |
| C  | 8.27802195086555  | 14.04609530115161 | 4.25831056799654 |
| Ru | 7.33895211181827  | 12.20748717086462 | 4.93661689420300 |
| Cl | 9.12009496095271  | 11.08239514986183 | 3.65388104239957 |
| O  | 10.54792222336706 | 10.79235613526350 | 8.64199815047491 |
| C  | 10.06426711423083 | 9.87292819521077  | 9.59651824772289 |



|   |                   |                   |                   |
|---|-------------------|-------------------|-------------------|
| C | 5.54891100669975  | 10.88785765257977 | 5.71963622037899  |
| C | 5.14834045238588  | 12.23229366741768 | 5.41602906283300  |
| C | 5.21339320014801  | 12.39663907961237 | 3.97233019521684  |
| C | 5.79111696394996  | 11.24308386893186 | 3.44280988207592  |
| C | 6.01786491217937  | 10.30008946992466 | 4.53477790880517  |
| C | 5.43488354039229  | 10.24813045802320 | 7.06368294573984  |
| C | 4.43329418946485  | 13.13741397677896 | 6.36560203962144  |
| C | 4.71853775277012  | 13.57288947859590 | 3.19282348472578  |
| C | 6.07465963010207  | 10.95705590037891 | 2.00719361743811  |
| C | 6.52974967523669  | 8.91293241078307  | 4.34556944974449  |
| H | 9.11013308931707  | 12.51434445509777 | 8.45556106015395  |
| H | 7.40925830887088  | 12.86260717680230 | 8.24340273448386  |
| H | 9.65442502438028  | 14.37516546464397 | 6.83004892320000  |
| H | 8.86819236100126  | 14.90649236103647 | 8.29983018820105  |
| H | 8.66177815084062  | 9.93522144876570  | 6.01066576221728  |
| H | 8.25524975048944  | 10.17667739170526 | 7.70232124396200  |
| H | 10.89770244395847 | 12.52289599123874 | 6.82250578201849  |
| H | 10.96138671334151 | 11.44427601529141 | 5.43879157737768  |
| H | 13.24581379143452 | 12.06165397474163 | 6.14599642066131  |
| H | 12.91967054591231 | 11.53539641960053 | 7.79051228423374  |
| H | 13.01776239380709 | 9.74892773367369  | 5.31491274171426  |
| H | 14.20512401675652 | 9.78723330964140  | 6.61075794539096  |
| H | 12.51931414803548 | 8.97139289637397  | 8.22434064676002  |
| H | 12.60549778287388 | 7.86583914591178  | 6.86221066821740  |
| H | 10.22516135730758 | 8.32923276504892  | 7.41585819220965  |
| H | 10.62476100510826 | 8.93380803667464  | 5.82296009740819  |
| H | 8.99157174042423  | 9.67472595318395  | 9.48665524127782  |
| H | 10.22966318901685 | 10.32863892180298 | 10.57224685714023 |
| H | 10.59640613556722 | 8.91758599583975  | 9.56212516955344  |
| H | 4.52731672031169  | 14.18305764808139 | 6.07825633425932  |
| H | 4.82154268583778  | 13.03712926184294 | 7.37873681880696  |
| H | 3.36504371385014  | 12.89877398317952 | 6.39585793911978  |
| H | 6.01818401761932  | 11.86443875802344 | 1.40712840843969  |
| H | 5.35017705417145  | 10.24156448333612 | 1.60553952879472  |
| H | 7.07198057421207  | 10.53268111817983 | 1.88806241835885  |
| H | 5.80885644322725  | 8.31252481764835  | 3.78276988514245  |
| H | 6.70617528227169  | 8.41514915147983  | 5.29809429282723  |
| H | 7.46766221022566  | 8.92378248499554  | 3.78820732686146  |
| H | 4.40077075940486  | 9.94214362116283  | 7.24842111278188  |
| H | 5.71757636438074  | 10.93289438495161 | 7.86356439001276  |

|   |                  |                   |                  |
|---|------------------|-------------------|------------------|
| H | 6.06008432262545 | 9.36114181267481  | 7.14331839155860 |
| H | 6.68577587143424 | 14.98611919621632 | 7.16246464693826 |
| H | 7.84700612063704 | 16.05143814981838 | 6.40135084935431 |
| H | 3.83773296101614 | 13.29642792742257 | 2.60701685558741 |
| H | 5.47961983354393 | 13.95090473956108 | 2.51075081858426 |
| H | 4.42463240923586 | 14.39184353019897 | 3.84744232143492 |
| H | 9.34188839606814 | 14.02051236132134 | 4.47326453247809 |
| H | 6.39571105498699 | 14.73420314682029 | 4.79822546974838 |
| O | 7.96808348446024 | 14.39927050905312 | 2.95448439093241 |
| C | 8.88851385716916 | 13.97195162319989 | 1.95430346587525 |
| H | 8.62627148243236 | 14.51592632001570 | 1.04787481901009 |
| H | 9.91513560316481 | 14.21994187929756 | 2.24181748795820 |
| H | 8.82277425843245 | 12.89746990391622 | 1.79158689093326 |

### TS<sub>AB</sub>

|    |                   |                   |                   |
|----|-------------------|-------------------|-------------------|
| C  | -0.53693110930941 | -2.78454006635064 | 1.03289017350369  |
| C  | -0.44920933286650 | -3.22226525632099 | -0.42607413841548 |
| C  | -0.99456073951457 | -2.01927181858937 | -1.20187598587917 |
| C  | -0.67455285118009 | -0.78177952547918 | -0.36123521109093 |
| C  | -0.17072735809801 | -1.28571139469212 | 1.03984962842952  |
| Ru | 1.24780842362665  | -0.03652859593339 | -0.13173095695299 |
| C  | 1.50690042637395  | -1.22609667774939 | 1.38755073059631  |
| C  | -1.71359053624023 | 0.33053664634719  | -0.36525779165380 |
| C  | -3.22804093549085 | 0.08714696891224  | -0.13610794911271 |
| C  | -3.90801393299491 | 1.47104251675800  | -0.06674323964297 |
| C  | -5.40839621318142 | 1.37758005320485  | 0.20196532000753  |
| C  | -5.68052433149207 | 0.61121001283063  | 1.49699540694236  |
| C  | -5.02023015866600 | -0.76679281032748 | 1.46484508129716  |
| C  | -3.52381219170913 | -0.67605878059994 | 1.15635852949128  |
| O  | -3.83893692035683 | -0.71691028730759 | -1.16543425939347 |
| C  | -3.74477776379448 | -0.26428149858909 | -2.50083914483279 |
| C  | 2.17954340816711  | 1.61656559815658  | -1.35231590057503 |
| C  | 1.04501392811726  | 2.22925127153780  | -0.76139909730248 |
| C  | 1.19189284477325  | 2.15430420030904  | 0.65514228305930  |
| C  | 2.47881795092239  | 1.58081817259105  | 0.93253390735075  |
| C  | 3.09493018902848  | 1.23724653510214  | -0.29511892813771 |
| C  | 2.48570853750892  | 1.53323136528456  | -2.81005731921310 |
| C  | -0.04114696815585 | 2.93084079067880  | -1.50739213767610 |
| C  | 0.28425804339779  | 2.74861137882884  | 1.68339557097952  |
| C  | 3.08064731565295  | 1.46890042653882  | 2.29405069469632  |

|    |                   |                   |                   |
|----|-------------------|-------------------|-------------------|
| C  | 4.46148256395401  | 0.67831361300925  | -0.51077172370014 |
| Cl | 2.15541049690458  | -1.64647434578940 | -1.71127296987608 |
| H  | -0.55347710255210 | -1.94300086289735 | -2.19542941872715 |
| H  | -2.07528460663771 | -2.10631828514316 | -1.31061408349924 |
| H  | 0.58823978823602  | -3.40343094253403 | -0.69568643674709 |
| H  | -1.02082223863246 | -4.13325963561089 | -0.61182244959788 |
| H  | -1.63285987334372 | 0.83921550875980  | -1.32654844882669 |
| H  | -1.42470104743616 | 1.06735241614166  | 0.38098414910045  |
| H  | -3.71064733263792 | 2.03161909418541  | -0.98348130221223 |
| H  | -3.43309935758295 | 2.03530051022621  | 0.74173682194977  |
| H  | -5.83730380635777 | 2.38162160898806  | 0.25490436898412  |
| H  | -5.89689984456734 | 0.86579651514914  | -0.63139545059893 |
| H  | -5.28493398414889 | 1.18567336276543  | 2.34339609607706  |
| H  | -6.75641147293347 | 0.51183951580391  | 1.66156143204221  |
| H  | -5.49947387445958 | -1.38025448183779 | 0.69880649011853  |
| H  | -5.16391136108846 | -1.27877321229272 | 2.41997000845737  |
| H  | -3.10649300113708 | -1.67743616908990 | 1.07545891362872  |
| H  | -3.00639174203458 | -0.17135130719389 | 1.97824422364701  |
| H  | -4.31052927563831 | -0.97491118261600 | -3.10205899370688 |
| H  | -2.71269756615956 | -0.25064854969341 | -2.86373471108809 |
| H  | -4.18110292682722 | 0.73012583077408  | -2.63789480576536 |
| H  | 0.29277305459652  | 3.93319798506772  | -1.79304602611577 |
| H  | -0.94370174999089 | 3.04501624022778  | -0.91092037985788 |
| H  | -0.30753470998975 | 2.40479093590795  | -2.42378662211678 |
| H  | 3.86912833469903  | 0.71826731766192  | 2.32429605080348  |
| H  | 2.33734947060501  | 1.20647731932751  | 3.04880465917827  |
| H  | 3.51947740813391  | 2.42415352034336  | 2.59643217878623  |
| H  | 4.88661925082506  | 0.30045729796945  | 0.41886258310416  |
| H  | 5.14008656851620  | 1.44205857867488  | -0.90308121608126 |
| H  | 4.42558370022686  | -0.14926969784771 | -1.21970400553357 |
| H  | 3.18257819634264  | 2.32662711645560  | -3.09861878352111 |
| H  | 1.58474205108750  | 1.64110529630939  | -3.41277254168112 |
| H  | 2.93247461470104  | 0.57058457322223  | -3.05311227829546 |
| H  | -1.56459396038949 | -2.85408801795788 | 1.39290491849125  |
| H  | 0.09225636714929  | -3.37326217194773 | 1.69618636560357  |
| H  | -0.71827609770122 | 2.91222930379026  | 1.29103548708965  |
| H  | 0.66213804111160  | 3.71718113464381  | 2.02594095630196  |
| H  | 0.19706538450809  | 2.10774454016616  | 2.56254824805495  |
| O  | 2.12674364908837  | -2.43321538041448 | 1.36990820514194  |
| H  | -0.62560326598260 | -0.72551838145061 | 1.85130701140022  |

|   |                  |                   |                  |
|---|------------------|-------------------|------------------|
| H | 1.61289757435925 | -0.75454659742106 | 2.36918992205267 |
| C | 3.01260714473089 | -2.68911883069331 | 2.45279746686522 |
| H | 3.32286114846523 | -3.72752752284259 | 2.36264875044169 |
| H | 3.89272192749738 | -2.04352545066642 | 2.39100124443694 |
| H | 2.51453828587249 | -2.53590171487208 | 3.41545855471617 |

**B**

|    |                   |                   |                   |
|----|-------------------|-------------------|-------------------|
| C  | -0.59731997668462 | -1.41625978024169 | 2.53666025196891  |
| C  | -0.67549287235695 | -2.71208293555342 | 1.69442257536316  |
| C  | -1.06006940014551 | -2.27370875399581 | 0.26117892519893  |
| C  | -0.93076186095063 | -0.75996539578159 | 0.24222242812494  |
| C  | -0.59160465747252 | -0.30153889354179 | 1.51699694643985  |
| Ru | 1.21771126213131  | 0.01212737530154  | 0.25887299514305  |
| C  | 2.15598735875378  | -1.52401430148922 | 0.78079518632012  |
| C  | -1.68567474730725 | 0.06765095953841  | -0.76855343840960 |
| C  | -3.22477784112018 | -0.06522476627263 | -0.76829004731960 |
| C  | -3.80913277507834 | 1.02963008558192  | -1.68108729310148 |
| C  | -5.33643720951242 | 1.01580670176083  | -1.70415596718185 |
| C  | -5.90467294778252 | 1.16365621679101  | -0.29161182958314 |
| C  | -5.34128996952215 | 0.09218625552096  | 0.64275091789864  |
| C  | -3.81174118224207 | 0.08565918958556  | 0.63853880345480  |
| O  | -3.66884157607998 | -1.36822803526267 | -1.19922347011494 |
| C  | -3.24723111749233 | -1.81299012881533 | -2.47564319632374 |
| C  | 1.58082991334532  | 2.18998865066495  | -0.66266954670077 |
| C  | 0.87904569289112  | 2.39676931796266  | 0.52371570529320  |
| C  | 1.63919259739253  | 1.79873656007581  | 1.61009829225603  |
| C  | 2.86977623321843  | 1.32911394930084  | 1.07427623272973  |
| C  | 2.80828053317417  | 1.47713228097908  | -0.34111976851656 |
| C  | 1.19795740820696  | 2.60304702875247  | -2.04277751162573 |
| C  | -0.38857277673954 | 3.16499678443795  | 0.70265243971187  |
| C  | 1.32166326401384  | 1.95143180991342  | 3.06196666569247  |
| C  | 4.03657080763005  | 0.83978529429631  | 1.86344097014534  |
| C  | 3.88990208487706  | 1.18298578585820  | -1.32727527778691 |
| Cl | 1.18893844964198  | -0.88266672137039 | -2.01252491562635 |
| H  | -0.44010924919599 | -2.74305342147125 | -0.50201200400685 |
| H  | -2.09690715310996 | -2.52890108459988 | 0.04053054771811  |
| H  | 0.27864151640900  | -3.23019201866812 | 1.69589306841640  |
| H  | -1.41102009218888 | -3.40297284375615 | 2.10764039826007  |
| H  | -1.30998677543425 | -0.14540573626153 | -1.76816035930598 |
| H  | -1.46979465763914 | 1.11961796352066  | -0.58998095706466 |

|   |                   |                   |                   |
|---|-------------------|-------------------|-------------------|
| H | -3.40099591109972 | 0.93123235467860  | -2.68941511961852 |
| H | -3.46129429418453 | 1.99705200005899  | -1.30590983893912 |
| H | -5.70434954436691 | 1.81843835031611  | -2.34876956867258 |
| H | -5.68418433984183 | 0.07417629879915  | -2.13723876411758 |
| H | -5.64603376331852 | 2.15646472580276  | 0.09640831680852  |
| H | -6.99633472215879 | 1.11087340688195  | -0.31336510680180 |
| H | -5.69802179996142 | -0.88989722027846 | 0.32446145892191  |
| H | -5.70437591575420 | 0.24959524566242  | 1.66201089773614  |
| H | -3.43671957468804 | -0.72196752362212 | 1.26845042878369  |
| H | -3.43625709918182 | 1.02228787599030  | 1.06289532257317  |
| H | -3.70381883714846 | -2.79172602475720 | -2.61956193993595 |
| H | -2.16133204520338 | -1.91921846775509 | -2.54271153478814 |
| H | -3.58647871704017 | -1.15159792496899 | -3.27936008897272 |
| H | -0.18788970248457 | 4.11494457848358  | 1.20718515726642  |
| H | -1.11838423369634 | 2.63089101964928  | 1.31334777392936  |
| H | -0.85923213920599 | 3.39111269456051  | -0.25238195247240 |
| H | 4.65423937488374  | 0.15350036383082  | 1.28423771485707  |
| H | 3.72267037377312  | 0.32471475815708  | 2.77232902064846  |
| H | 4.67141294794866  | 1.67726520582151  | 2.16569691410183  |
| H | 4.62993002321433  | 0.49909257766467  | -0.91292736559511 |
| H | 4.40772567374110  | 2.10180875867956  | -1.62020713396999 |
| H | 3.47547337980679  | 0.71940428705543  | -2.22195881122917 |
| H | 1.89410838430997  | 3.35380110244042  | -2.42758456392609 |
| H | 0.19549062682316  | 3.02700823937037  | -2.07329896273507 |
| H | 1.22272385601779  | 1.74166987879685  | -2.71284998164023 |
| H | -1.49242381670403 | -1.30362699756711 | 3.15997132833119  |
| H | 0.25796465724248  | -1.39627519853223 | 3.21419472619390  |
| H | 0.25005891117482  | 1.89762467667667  | 3.25080485553054  |
| H | 1.66888651699343  | 2.92109533165515  | 3.43355755834814  |
| H | 1.80099081969994  | 1.17612418104333  | 3.65862404028978  |
| O | 2.09777250939674  | -2.74477992711972 | 0.27961735953975  |
| H | -0.87396926826606 | 0.68681277337769  | 1.84812192249445  |
| H | 2.95832014373983  | -1.45478674079719 | 1.53352196277625  |
| C | 3.10353379420261  | -3.70325844133462 | 0.63252377636555  |
| H | 2.60481495592482  | -4.65948227636979 | 0.77880098960872  |
| H | 3.81503948991617  | -3.78039813672929 | -0.18977711158854 |
| H | 3.61850200186505  | -3.40365219838255 | 1.54776655243070  |

**C (secondary carbene)**

|   |                  |                   |                  |
|---|------------------|-------------------|------------------|
| C | 6.54538194717361 | 10.05004977731411 | 4.27144969329349 |
|---|------------------|-------------------|------------------|

|    |                   |                   |                  |
|----|-------------------|-------------------|------------------|
| C  | 5.82090112967224  | 10.63544989344868 | 5.39003154862430 |
| C  | 5.18973815317936  | 11.79148368559783 | 4.93327477522879 |
| C  | 5.46445823142651  | 11.93642153362853 | 3.50613292345711 |
| C  | 6.21591001110915  | 10.79318296721300 | 3.08834821142086 |
| Ru | 7.42337505976596  | 12.00196536762308 | 4.41353542048603 |
| Cl | 8.66480131861550  | 12.53547243828909 | 6.30717481780414 |
| C  | 5.89190251430046  | 10.12329745333407 | 6.78988967874298 |
| C  | 4.40175310907489  | 12.77392952373515 | 5.73194837160225 |
| C  | 4.84737424317975  | 12.97077509625801 | 2.62359906214645 |
| C  | 6.56088033736460  | 10.40993442088795 | 1.68874170045742 |
| C  | 7.29061558112853  | 8.75908558099770  | 4.32696995352395 |
| C  | 8.62081426315364  | 12.51096508904922 | 3.03880205288960 |
| O  | 9.07419868726021  | 13.74495255070830 | 2.84188071681424 |
| H  | 8.92618429605261  | 11.83997576498484 | 2.21989135208906 |
| H  | 5.40884790995393  | 13.08395264958851 | 1.69687421801233 |
| H  | 4.82104844022667  | 13.94316561393990 | 3.11512937134247 |
| H  | 3.81845029297883  | 12.70150114602501 | 2.36208981470167 |
| H  | 8.00966444382374  | 8.68071530377909  | 3.51289308604978 |
| H  | 6.59928729529448  | 7.91266698026255  | 4.24947897467021 |
| H  | 7.83483617965840  | 8.66186625388469  | 5.26542986064193 |
| H  | 5.40442139932106  | 9.14759783535182  | 6.86963452147045 |
| H  | 5.40611563247774  | 10.80128274144005 | 7.48851906467583 |
| H  | 6.92851343772492  | 10.01144787676452 | 7.11114955923592 |
| H  | 3.33272696242835  | 12.67563842070293 | 5.51993813184843 |
| H  | 4.69292312614960  | 13.79623368474448 | 5.48744567654297 |
| H  | 4.55083497132928  | 12.63363799780054 | 6.80043252063319 |
| H  | 7.51972034065932  | 9.89277295187119  | 1.64057807382335 |
| H  | 6.62030554487221  | 11.28347490009153 | 1.03912513984509 |
| H  | 5.80413394471585  | 9.73760221323248  | 1.27413208266260 |
| C  | 9.72184427904171  | 14.04523344150629 | 1.59401849439592 |
| H  | 10.31254639507725 | 14.94365983237021 | 1.75508385620143 |
| H  | 10.37046537337647 | 13.21971624893808 | 1.29553324140541 |
| H  | 8.97105214843292  | 14.22893276463612 | 0.82338403326014 |

### TS<sub>AD</sub>

|   |                  |                  |                   |
|---|------------------|------------------|-------------------|
| C | 3.85938827515857 | 0.81286920350524 | -0.51820789951663 |
| C | 3.06587239286633 | 0.94143332102062 | -1.66751241346984 |
| C | 1.79223496188233 | 1.55836671079568 | -1.29742575786220 |
| C | 1.82127005418228 | 1.78672664763437 | 0.10507531760835  |
| C | 3.07021951997563 | 1.25887519062146 | 0.58713630850573  |

|    |                   |                   |                   |
|----|-------------------|-------------------|-------------------|
| Ru | 1.82423389487594  | -0.40196438610654 | -0.36249903104880 |
| Cl | 2.73539119826695  | -2.44023017107061 | -1.10836962880209 |
| C  | 3.44207008674694  | 0.54544489974234  | -3.05530139678020 |
| C  | 0.82031001803022  | 2.10170132150814  | -2.29233953131517 |
| C  | 0.89664369159929  | 2.63267648913798  | 0.91600278101215  |
| C  | 3.57930789282844  | 1.45507719545872  | 1.97492946235351  |
| C  | 5.21954781381419  | 0.20409139125361  | -0.45561995165737 |
| C  | -0.47822588761308 | -2.41206895425106 | -0.72493498766505 |
| C  | -0.32971494651271 | -3.41019978927088 | 0.43291286655888  |
| C  | -0.70124356291199 | -2.60792439588100 | 1.68605911396743  |
| C  | -0.17161407408413 | -1.19718031763294 | 1.40804663385464  |
| C  | -0.23352640272559 | -1.00199117954138 | -0.12732690986287 |
| C  | -1.21579994232665 | 0.06037704645591  | -0.62747989337686 |
| C  | -2.73546324804014 | 0.05865634207618  | -0.26571532574919 |
| C  | -3.50651298973395 | -1.19911674515746 | -0.68354266063201 |
| C  | -5.01889860639946 | -1.07247376418768 | -0.48254148056257 |
| C  | -5.59258058181932 | 0.14569411364058  | -1.20152289205400 |
| C  | -4.86484931406040 | 1.41485147672588  | -0.76190990909240 |
| C  | -3.35797998720414 | 1.28045190768216  | -0.97492172359811 |
| C  | 1.29782975598640  | -0.96575567334255 | 1.67734389397269  |
| H  | 1.52685728256077  | -0.12592104115426 | 2.33118597986362  |
| O  | -2.95629332603309 | 0.12003602545483  | 1.16347161973865  |
| C  | -2.62892959761206 | 1.31326534606047  | 1.83816502498262  |
| O  | 1.95447385793728  | -2.11081534496442 | 2.06728831254317  |
| H  | 0.19333620185419  | -2.65269629609399 | -1.54494009491802 |
| H  | -1.48549172034618 | -2.46005427703163 | -1.13225288710735 |
| H  | 0.70380374919290  | -3.74586363987319 | 0.50098909315886  |
| H  | -0.96104105152060 | -4.29127948211542 | 0.29882111082764  |
| H  | -1.17498724478824 | 0.07571393497369  | -1.71992424861919 |
| H  | -0.85779814303650 | 1.03749443912766  | -0.31270330355775 |
| H  | -3.14079813651659 | -2.04621364762928 | -0.10702637636290 |
| H  | -3.29224356389873 | -1.40303795985105 | -1.73649789933480 |
| H  | -5.50438849724410 | -1.98625986482674 | -0.83497931089457 |
| H  | -5.22734106401707 | -0.99308645277235 | 0.58692383693140  |
| H  | -5.47713196746883 | 0.02000922014268  | -2.28471685441604 |
| H  | -6.66469754429215 | 0.23449000790455  | -1.00779532834971 |
| H  | -5.07516577407404 | 1.59827071901873  | 0.29535347704880  |
| H  | -5.23675605038407 | 2.28271006978433  | -1.31332013627136 |
| H  | -2.84214011713475 | 2.19223888863554  | -0.66290199214033 |
| H  | -3.15710525276639 | 1.17254773443587  | -2.04471934568719 |

|   |                   |                   |                   |
|---|-------------------|-------------------|-------------------|
| H | -3.27554558924167 | 2.14938777093649  | 1.55269970518603  |
| H | -1.58917253911349 | 1.61178155318146  | 1.68385119638730  |
| H | -2.77448687219373 | 1.11400463595157  | 2.89994397950904  |
| H | -0.10846114971115 | 2.41759766013598  | -1.82560672582724 |
| H | 0.57444600494124  | 1.36580564403097  | -3.05817834726785 |
| H | 1.25594660843873  | 2.96922398727481  | -2.79822484204335 |
| H | 2.78739434714491  | 1.40412795888532  | 2.71963323015887  |
| H | 4.02572438426466  | 2.45172316322041  | 2.04967690904434  |
| H | 4.34523106793967  | 0.73047014050545  | 2.23993658630537  |
| H | 5.97839818983929  | 0.89851388306787  | -0.82700376968096 |
| H | 5.26446620750510  | -0.70422663913324 | -1.05753663080101 |
| H | 5.48895241871996  | -0.06251626365892 | 0.56524605694263  |
| H | 2.58646323228954  | 0.14129477460434  | -3.59652460645622 |
| H | 4.22141758319135  | -0.21335926816387 | -3.05302730659193 |
| H | 3.80539321227790  | 1.41462561459883  | -3.61310439317446 |
| H | -1.78678041874637 | -2.53738994692243 | 1.78873580258876  |
| H | -0.30280642861676 | -3.04164901295498 | 2.60325173309915  |
| H | 1.35607997824948  | 3.60341573976452  | 1.12857748472052  |
| H | 0.65663925502714  | 2.17035411777560  | 1.87367816420016  |
| H | -0.03824610047247 | 2.82314194706869  | 0.39400470416472  |
| H | -0.74994437234905 | -0.44800364362742 | 1.94165724655767  |
| C | 3.32751787802462  | -2.01245708977559 | 2.39069955651535  |
| H | 3.61031487210812  | -2.96788868632365 | 2.82813049281797  |
| H | 3.92186122461746  | -1.84287048308003 | 1.49004365504513  |
| H | 3.50512495267179  | -1.21503881740499 | 3.11868645637643  |

## D

|    |                   |                   |                   |
|----|-------------------|-------------------|-------------------|
| C  | 3.45303218007251  | 0.76604596192430  | -0.95908500781897 |
| C  | 2.47229134299392  | 0.97489814191089  | -1.94112192622708 |
| C  | 1.38884618022217  | 1.69828208157999  | -1.34062252291287 |
| C  | 1.72131359039286  | 1.95204515847421  | 0.03438287817957  |
| C  | 2.98591567835322  | 1.32555807417441  | 0.28832240224141  |
| Ru | 1.47589224040823  | -0.21371943716240 | -0.12129355732179 |
| Cl | 2.88679551781727  | -2.16578990015710 | 0.09656103633047  |
| C  | 2.54529594230075  | 0.55946261712479  | -3.37389286272023 |
| C  | 0.32212993257359  | 2.37719094358641  | -2.13858069836313 |
| C  | 1.02409731506674  | 2.88779691170176  | 0.96618031941623  |
| C  | 3.81762306094272  | 1.51146002280800  | 1.51380348952035  |
| C  | 4.77726166199328  | 0.11718562254253  | -1.16498464425367 |
| C  | -0.35884282437975 | -1.58475950049382 | -0.64102401699795 |



|   |                   |                   |                   |
|---|-------------------|-------------------|-------------------|
| C | -0.48738765173886 | -2.84644690235574 | 0.23102261051804  |
| C | -0.98056899977084 | -2.33355934677760 | 1.59909892257614  |
| C | -0.60928063785678 | -0.84557404135118 | 1.64936187970517  |
| C | -0.63763590056058 | -0.38536585694942 | 0.19341367086881  |
| C | -1.63684041666920 | 0.63348780260656  | -0.28605312706531 |
| C | -3.14612204675279 | 0.32021457761997  | -0.11798845705661 |
| C | -3.55052240901437 | -0.99178793169522 | -0.79875008745390 |
| C | -5.06081099789177 | -1.23276422022505 | -0.76737415974917 |
| C | -5.83313947071740 | -0.06371446805941 | -1.37697824833125 |
| C | -5.45500339922652 | 1.25248823283066  | -0.69712371096542 |
| C | -3.94458254016482 | 1.47860957998182  | -0.74607896961556 |
| C | 0.84782372359675  | -0.55427023901309 | 1.93590735159608  |
| H | 0.97484988967414  | 0.42837270397490  | 2.40216203520088  |
| O | -3.50720989684632 | 0.12800494531782  | 1.26346447412721  |
| C | -3.41819113130570 | 1.24318544950283  | 2.12519621797034  |
| O | 1.40581535879311  | -1.53593243419616 | 2.75404436218888  |
| H | 0.72941416789243  | -1.55753968613061 | -1.09252793498308 |
| H | -0.90642070020034 | -1.59735192905852 | -1.58251419871781 |
| H | 0.47605461067116  | -3.34337895966816 | 0.32087930545647  |
| H | -1.18764961308294 | -3.55246524112294 | -0.21799441813197 |
| H | -1.48806418132505 | 0.80647670679089  | -1.34962472616204 |
| H | -1.45082480588676 | 1.58843537265047  | 0.20670996321889  |
| H | -3.03580761333032 | -1.81969628514540 | -0.31466176639655 |
| H | -3.20674085046612 | -0.95760836233826 | -1.83728439251700 |
| H | -5.29117175315339 | -2.15909490374327 | -1.29969105889121 |
| H | -5.37351469866340 | -1.37436605739610 | 0.26954073637098  |
| H | -5.60417564779465 | 0.00583783961382  | -2.44715537899797 |
| H | -6.90930327625243 | -0.23636077512817 | -1.29735425009692 |
| H | -5.78877880545110 | 1.22781241330490  | 0.34374324584840  |
| H | -5.96806868473610 | 2.09118496690391  | -1.17472753023254 |
| H | -3.67671092040741 | 2.42186577915067  | -0.26374691779083 |
| H | -3.62763209155286 | 1.57160086585929  | -1.78919898641380 |
| H | -4.15601752310193 | 2.01537721784001  | 1.88532082330327  |
| H | -2.42252876788315 | 1.69867176809126  | 2.12322090477416  |
| H | -3.62137359648459 | 0.87020003100240  | 3.12829330298230  |
| H | -0.45901566380523 | 2.79901653619642  | -1.51348123889167 |
| H | -0.14404305567913 | 1.70710809258604  | -2.86120327646722 |
| H | 0.77103017302608  | 3.19918588034888  | -2.70503091338039 |
| H | 3.20230665482100  | 1.59064683399596  | 2.40778165741369  |
| H | 4.40845353389646  | 2.43007354558122  | 1.43476616447234  |

|   |                   |                   |                   |
|---|-------------------|-------------------|-------------------|
| H | 4.50724865787851  | 0.68233607622400  | 1.65667692088633  |
| H | 5.51233525408325  | 0.87426262424184  | -1.45839689811609 |
| H | 4.73622109155368  | -0.64024154806272 | -1.94502249944993 |
| H | 5.12630588224119  | -0.36946182239898 | -0.25812984933935 |
| H | 1.55663964457418  | 0.33056938751840  | -3.77211848399790 |
| H | 3.16802960214035  | -0.32561658936806 | -3.49686445212638 |
| H | 2.97140660998956  | 1.35504929935110  | -3.99381996402673 |
| H | -2.06721065766285 | -2.41022065513427 | 1.66576356393229  |
| H | -0.54883286149784 | -2.88957718055279 | 2.42829678112833  |
| H | 1.50124077626859  | 3.87247095665663  | 0.94487784192478  |
| H | 1.05913209048228  | 2.53090007745394  | 1.99508722929840  |
| H | -0.02155635737803 | 3.02382001574498  | 0.69689846993213  |
| H | -1.28213462865693 | -0.30792384482057 | 2.31415763241486  |
| C | 2.67548335677913  | -1.23604520780130 | 3.28801592688659  |
| H | 2.92992726359550  | -2.04259406048561 | 3.97463394160189  |
| H | 3.42729665458893  | -1.18593237376647 | 2.49990474052105  |
| H | 2.65345843766477  | -0.28731635421055 | 3.84127332917354  |

### TS<sub>DE</sub>

|    |                   |                   |                   |
|----|-------------------|-------------------|-------------------|
| C  | 3.46715574516860  | 0.95209677723463  | -0.61999536441758 |
| C  | 2.85573487507535  | 0.75112010255632  | -1.90240258174391 |
| C  | 1.58782661184945  | 1.45005943321447  | -1.89063885199947 |
| C  | 1.42831114361773  | 2.07900379130756  | -0.62055751029153 |
| C  | 2.57296261537297  | 1.73191425390864  | 0.18128873674934  |
| Ru | 1.60747144046818  | -0.11335061191864 | -0.42060543815445 |
| Cl | 2.74967582162016  | -2.25530728093671 | -0.18106355220413 |
| C  | 3.46782865714951  | 0.03050966626374  | -3.05719662496646 |
| C  | 0.65386307088202  | 1.56394305427242  | -3.04999042340672 |
| C  | 0.41447773268535  | 3.10971489949186  | -0.24785143164483 |
| C  | 2.84241404944442  | 2.27306980135417  | 1.54619827101559  |
| C  | 4.81320044356934  | 0.45305981673897  | -0.21680289791063 |
| C  | -0.35933804377374 | -1.52726267956430 | -0.96523917845568 |
| C  | -0.50140898106118 | -3.03583505367643 | -0.69268899681797 |
| C  | -0.62026281175550 | -3.20466046727207 | 0.83862208181772  |
| C  | -0.96932525312355 | -1.82740114324709 | 1.40468000830383  |
| C  | -0.60949468006605 | -0.79000965696376 | 0.34406829456635  |
| C  | -1.43647129457744 | 0.48377376900002  | 0.28358149768081  |
| C  | -2.97335288538407 | 0.38601265599943  | 0.41121336334990  |
| C  | -3.56787686770081 | -0.71570237931944 | -0.47221933913882 |
| C  | -5.09682942930254 | -0.73504091326943 | -0.44379946059331 |

|   |                   |                   |                   |
|---|-------------------|-------------------|-------------------|
| C | -5.68264731836472 | 0.62307391907159  | -0.82963332254776 |
| C | -5.11175302667513 | 1.73584755901213  | 0.05045288332141  |
| C | -3.58416207275657 | 1.73972195359346  | 0.00521523469799  |
| C | 0.15341287205126  | -1.04004427323876 | 1.91652359998899  |
| H | -0.08059507701274 | -0.11817002499781 | 2.44454503512321  |
| O | -3.37303588967947 | 0.02316698740602  | 1.75404099145914  |
| C | -3.14955298684128 | 0.95895072894272  | 2.78798085892584  |
| O | 1.20988711951604  | -1.71756483720484 | 2.43061918655638  |
| H | 0.62174648241197  | -1.35192326466627 | -1.49896120159829 |
| H | -1.08092249829184 | -1.16633213117091 | -1.69775724033227 |
| H | 0.34955475598539  | -3.58931449334347 | -1.08298495128356 |
| H | -1.40075504772027 | -3.39972399953210 | -1.19397971913301 |
| H | -1.22771077158813 | 0.96333087629149  | -0.66940585054406 |
| H | -1.08751349477100 | 1.18919801593504  | 1.03643740170546  |
| H | -3.17473778374035 | -1.68208352061231 | -0.15804746815332 |
| H | -3.22602852483103 | -0.54764637869289 | -1.49780501707413 |
| H | -5.46291891519568 | -1.51175887451129 | -1.11987721180552 |
| H | -5.42950077699496 | -1.00336197707423 | 0.56125294758846  |
| H | -5.44446037399528 | 0.83682513267444  | -1.87841450568368 |
| H | -6.77258050671847 | 0.60183238104812  | -0.75403488168753 |
| H | -5.44928642145179 | 1.58797178742624  | 1.07970314516469  |
| H | -5.49124986087743 | 2.70929536350179  | -0.27025686174463 |
| H | -3.17556115416566 | 2.53813789761809  | 0.62950758431065  |
| H | -3.25610032523682 | 1.95645369816997  | -1.01573710070677 |
| H | -3.79359745878376 | 1.83967676119746  | 2.69958473711415  |
| H | -2.10900972613852 | 1.29482865332224  | 2.83847881293250  |
| H | -3.38890022328771 | 0.44702522619292  | 3.71929740073092  |
| H | -0.37079161611519 | 1.74154607905381  | -2.72307885229201 |
| H | 0.65893573309009  | 0.65636445058606  | -3.65349720767484 |
| H | 0.94259567845545  | 2.39495014914999  | -3.70118029212549 |
| H | 1.94106823307881  | 2.27799966479908  | 2.15998636830888  |
| H | 3.20252210031735  | 3.30515519106596  | 1.48107462365849  |
| H | 3.59944123104135  | 1.69265523234471  | 2.06929507223682  |
| H | 5.59111581763552  | 1.12916555069739  | -0.58503588134088 |
| H | 4.99506899638096  | -0.54261372567797 | -0.61588933949808 |
| H | 4.90840582531751  | 0.39084771057233  | 0.86634930799345  |
| H | 2.70528775108873  | -0.32488245597545 | -3.75011913057589 |
| H | 4.03072499226292  | -0.83664093275430 | -2.71566440756341 |
| H | 4.14576062367565  | 0.68613157796153  | -3.61353886858568 |
| H | -1.38955965457390 | -3.92880270280241 | 1.10597710602443  |

|   |                   |                   |                   |
|---|-------------------|-------------------|-------------------|
| H | 0.32511367447882  | -3.55409592703664 | 1.24763794578249  |
| H | 0.83094117842619  | 4.11092473698793  | -0.40090295245415 |
| H | 0.12440030923295  | 3.03765315980372  | 0.80034424019905  |
| H | -0.48981028356377 | 3.03831396045962  | -0.84903562464744 |
| H | -1.92736564241784 | -1.72205954781939 | 1.89484772953945  |
| C | 2.31617386704257  | -0.94238856915983 | 2.86442308873400  |
| H | 2.95959136838486  | -1.61531872753148 | 3.42598188041979  |
| H | 2.85720428737798  | -0.54954210906889 | 2.00480593244038  |
| H | 1.98184957437879  | -0.12176276718897 | 3.50913817235734  |

## E

|    |                   |                   |                   |
|----|-------------------|-------------------|-------------------|
| C  | 4.20488046962089  | 1.20823719725429  | -1.14037573599365 |
| C  | 3.20745546463984  | 0.88076135402955  | -2.12403357707271 |
| C  | 1.95081397895888  | 1.43870520758570  | -1.67271716835278 |
| C  | 2.17347195761974  | 2.11726887859145  | -0.43405983219171 |
| C  | 3.55495324602360  | 1.95423999401391  | -0.08688284289040 |
| Ru | 2.71248957848145  | 0.01100005355786  | -0.27688136277451 |
| Cl | 3.49593576376829  | -2.18607238357991 | -0.24813833406193 |
| C  | 3.43798735586959  | 0.15797428955943  | -3.40782520187536 |
| C  | 0.66522554993708  | 1.37375914293228  | -2.42659107033933 |
| C  | 1.15883242979151  | 2.87810752710388  | 0.35468432882563  |
| C  | 4.22692778502350  | 2.51534686897566  | 1.12140771196289  |
| C  | 5.65495444871521  | 0.87010544424108  | -1.21275703480350 |
| C  | -0.46488505243701 | -1.50398890124765 | -0.26875773200882 |
| C  | -0.24557237607134 | -2.99853095783289 | 0.02056419783203  |
| C  | -1.26340043264213 | -3.36546028036681 | 1.12054763467518  |
| C  | -1.62704659741872 | -2.06671737882791 | 1.81593104668692  |
| C  | -1.16306608364443 | -0.89733781271379 | 0.94349149728312  |
| C  | -1.93712622797643 | 0.39347469603976  | 0.74678040074391  |
| C  | -3.45331575805883 | 0.29720582478145  | 0.49320628889092  |
| C  | -3.78599698342215 | -0.68994987724740 | -0.63034355866177 |
| C  | -5.27806885663033 | -0.71842276847146 | -0.96548721701042 |
| C  | -5.80566436305645 | 0.67533338298232  | -1.30720610341013 |
| C  | -5.49191114157142 | 1.67131626912000  | -0.18943259108375 |
| C  | -3.99620590277322 | 1.68860658268226  | 0.12302138268068  |
| C  | -0.52939767574652 | -1.18110370749187 | 2.28703425060607  |
| H  | -0.78340604925260 | -0.47378734721932 | 3.07703761411693  |
| O  | -4.14418016034737 | -0.23843538520758 | 1.64421239595765  |
| C  | -4.13261962167493 | 0.51916678131329  | 2.83493688170957  |
| O  | 0.76404904699586  | -1.69702587260097 | 2.41471686224504  |

|   |                   |                   |                   |
|---|-------------------|-------------------|-------------------|
| H | 0.48102451529299  | -0.99380515569849 | -0.50278140188189 |
| H | -1.10089817299604 | -1.36014606735594 | -1.14403622231046 |
| H | 0.77020569670731  | -3.16077437489713 | 0.37009479271615  |
| H | -0.38177502192583 | -3.60389537001424 | -0.87622816254553 |
| H | -1.50696464704145 | 0.91788088728205  | -0.10955093990351 |
| H | -1.77765892384340 | 1.05911360870984  | 1.59872424066753  |
| H | -3.44463676772443 | -1.68316351215386 | -0.33880208630546 |
| H | -3.21649965908299 | -0.39897564249359 | -1.51824302629480 |
| H | -5.45077525697880 | -1.40363345727806 | -1.79933677460580 |
| H | -5.82609130227788 | -1.11458903482180 | -0.10787412620283 |
| H | -5.34007983208860 | 1.02229488709049  | -2.23751021120878 |
| H | -6.88242319654945 | 0.63891159855335  | -1.49072622240285 |
| H | -6.04955335385686 | 1.39202049408500  | 0.70862178164623  |
| H | -5.82231308764966 | 2.67504318458482  | -0.46878549671455 |
| H | -3.77120187576024 | 2.40435769125841  | 0.91768900169601  |
| H | -3.44693377178567 | 2.03306810289282  | -0.75856061671076 |
| H | -4.63917156703458 | 1.48340769906515  | 2.72457994626632  |
| H | -3.12000775713997 | 0.69985908989698  | 3.21061092632818  |
| H | -4.67229351973066 | -0.07005107799477 | 3.57559793353627  |
| H | -0.19143635816257 | 1.49913301246159  | -1.76724861688013 |
| H | 0.55381614659603  | 0.41891010163189  | -2.93925723233621 |
| H | 0.62519871678345  | 2.16539127213807  | -3.18154001865162 |
| H | 3.53345335271335  | 2.60191851136143  | 1.95754217316283  |
| H | 4.62406919550844  | 3.51450152905182  | 0.91444652119923  |
| H | 5.05787849685553  | 1.88660015178738  | 1.43917033321115  |
| H | 6.20775095937594  | 1.66217719976798  | -1.72828899681683 |
| H | 5.81306165829326  | -0.06281023734988 | -1.75049455791190 |
| H | 6.08310310901158  | 0.75315763278500  | -0.21813109280042 |
| H | 2.54635109344443  | -0.38478082781622 | -3.71952862979519 |
| H | 4.24519756294910  | -0.56575546625521 | -3.30986023040731 |
| H | 3.70166902881748  | 0.85987983219767  | -4.20573356508888 |
| H | -2.17432422287425 | -3.78690175964210 | 0.68700513477863  |
| H | -0.86073715085578 | -4.10806358407867 | 1.81189857716271  |
| H | 1.15979497345171  | 3.93576589732081  | 0.07284160561576  |
| H | 1.36339185123303  | 2.82315676973308  | 1.42397861537264  |
| H | 0.15431103569167  | 2.49198556718649  | 0.19222428493279  |
| H | -2.57051939422933 | -2.01445919776629 | 2.33809329632425  |
| C | 1.75162759935879  | -0.70135397752481 | 2.37861579400527  |
| H | 2.72154468916033  | -1.18813276257868 | 2.40019303136104  |
| H | 1.64357918403484  | -0.05722238133768 | 1.46510064273201  |

H 1.66015818158771 -0.00020165574134 3.21926146337498

**Structures along the reaction profile for Substrate 1g**

**A**

|    |                   |                   |                  |
|----|-------------------|-------------------|------------------|
| C  | 10.76351156999318 | 8.97790887531543  | 6.95888184718096 |
| C  | 10.33024771539206 | 10.42664713279892 | 7.23564251955217 |
| C  | 11.18735847063094 | 11.38521731100543 | 6.40471753334380 |
| C  | 12.68672284950087 | 11.16400808160520 | 6.61040777841007 |
| C  | 13.08659586668250 | 9.71413966254854  | 6.33877119862207 |
| C  | 12.25691849848861 | 8.75402120621720  | 7.19200947247111 |
| C  | 8.80777086479200  | 10.54228011244721 | 6.88956859183807 |
| C  | 8.31175932866473  | 11.90959588641803 | 6.52804970747590 |
| C  | 8.44361335067249  | 12.90334720408701 | 7.64009088441278 |
| C  | 8.80750191346991  | 14.32814352242789 | 7.23307039956304 |
| C  | 7.75016278139367  | 14.98198391095668 | 6.35833989478121 |
| C  | 7.40095549108722  | 14.25650047549533 | 5.08675868231751 |
| C  | 8.33273934891005  | 13.77423731354484 | 4.14384113094024 |
| Ru | 7.35695901294906  | 12.09578420594380 | 4.89068657916975 |
| Cl | 9.02245671064215  | 10.85589366558371 | 3.62417261008289 |
| O  | 10.58236179554013 | 10.81021041894906 | 8.60566119902519 |
| C  | 10.11228394196841 | 9.95993923139907  | 9.62892792388834 |
| C  | 5.52578388235290  | 10.89464116248447 | 5.78419240391469 |
| C  | 5.16362024725590  | 12.22342530933470 | 5.38277429252103 |
| C  | 5.21552820042683  | 12.27906763485324 | 3.92989487769073 |
| C  | 5.74479326216402  | 11.07010662649886 | 3.48117468891545 |
| C  | 5.96144084342233  | 10.20727401368853 | 4.64149209536749 |
| C  | 5.40774315219248  | 10.36052923983840 | 7.17343864099484 |
| C  | 4.49202306824289  | 13.22165105857717 | 6.26858944319748 |
| C  | 4.73656516495646  | 13.40909382367231 | 3.07790902871767 |
| C  | 5.99093660632559  | 10.65542645025689 | 2.07147867003904 |
| C  | 6.42792323949957  | 8.79503209549416  | 4.54902165707328 |
| H  | 9.15847893269871  | 12.53799263996205 | 8.37924052819424 |
| H  | 7.46529143115345  | 12.91181254583955 | 8.14522036400560 |
| H  | 9.76827022557645  | 14.31940197978281 | 6.71932959062303 |
| H  | 8.93922030625818  | 14.92577785452958 | 8.13828620142981 |
| H  | 8.60271293232107  | 9.84598728718895  | 6.08423580429518 |
| H  | 8.25146020418394  | 10.20311023488459 | 7.77106727021990 |
| H  | 10.93039311629814 | 12.41119915856854 | 6.66718288703048 |

|   |                   |                   |                   |
|---|-------------------|-------------------|-------------------|
| H | 10.92114036242963 | 11.25085809614789 | 5.35605410411591  |
| H | 13.23956615879686 | 11.83807766952024 | 5.95169287608217  |
| H | 12.95556639964377 | 11.42755846270570 | 7.63666746813070  |
| H | 12.92347301420741 | 9.48473745655542  | 5.28003352505158  |
| H | 14.15241977965821 | 9.57019960356341  | 6.53387729364608  |
| H | 12.49806416560559 | 8.90899164543754  | 8.24773198073938  |
| H | 12.50983909848118 | 7.71657500860669  | 6.95832956719592  |
| H | 10.16213935915014 | 8.28322848556032  | 7.55144037756918  |
| H | 10.52870550886626 | 8.77366278346994  | 5.91158068625488  |
| H | 9.03518941759455  | 9.76703991619107  | 9.55661057245675  |
| H | 10.30493251800613 | 10.47611411923268 | 10.56883277171598 |
| H | 10.63404954443966 | 8.99864955770193  | 9.64431771975219  |
| H | 4.59689383120849  | 14.23709183465844 | 5.89101911674331  |
| H | 4.90092028824281  | 13.19844850159111 | 7.27814095792719  |
| H | 3.42071007508102  | 13.00804560400582 | 6.34085493728827  |
| H | 5.90917958334136  | 11.50011153372349 | 1.38960308890450  |
| H | 5.26264850021722  | 9.89877166886608  | 1.76375730214243  |
| H | 6.98985716910159  | 10.23156891356572 | 1.96489224188898  |
| H | 5.68310396377844  | 8.18155843091120  | 4.03393587118667  |
| H | 6.59608422873627  | 8.35998062001727  | 5.53303582349373  |
| H | 7.35988913542954  | 8.73811691331342  | 3.98434188317637  |
| H | 4.36704522892018  | 10.10117693373144 | 7.38911707730033  |
| H | 5.71938760101611  | 11.09291317017099 | 7.91836642740526  |
| H | 6.00660108659627  | 9.46293648287056  | 7.31230803393625  |
| H | 6.83246513522955  | 15.10062993853910 | 6.94242402556670  |
| H | 8.07611611534439  | 15.99547777124077 | 6.09358339243163  |
| H | 5.37931855560351  | 13.55954752126375 | 2.21174624347364  |
| H | 4.69826138057327  | 14.34720337645763 | 3.62968351598644  |
| H | 3.72306734270522  | 13.21022353415204 | 2.71751634084903  |
| F | 9.66237351820415  | 13.93305332700814 | 4.33882671011382  |
| H | 6.49216428202444  | 14.61956472727200 | 4.62777462799834  |
| F | 8.08951132565930  | 13.98531605974922 | 2.81524104217092  |

## A'

|    |                   |                   |                   |
|----|-------------------|-------------------|-------------------|
| C  | -0.26238926898089 | -2.78581541261584 | 1.08336187833032  |
| C  | -1.06959517223596 | -3.25675641674461 | -0.12945460030921 |
| C  | -0.81911727073762 | -2.21005104723389 | -1.22629810923606 |
| C  | -0.54028231087749 | -0.87871870818720 | -0.52636402550790 |
| C  | -0.22706072063927 | -1.25380860732245 | 1.01359524479554  |
| Ru | 1.35606812935661  | -0.16400981963676 | -0.15646638670845 |

|    |                   |                   |                   |
|----|-------------------|-------------------|-------------------|
| C  | 1.06967930798860  | -0.65337992509900 | 1.70402016086541  |
| C  | -1.55602096745767 | 0.23283579985530  | -0.75551205007528 |
| C  | -3.02404685434630 | 0.16908897704614  | -0.24308970790690 |
| C  | -3.82988484318161 | -1.00898920883104 | -0.79672271854322 |
| C  | -5.31059261652857 | -0.95085595228964 | -0.41548499348161 |
| C  | -5.95654804656689 | 0.36314928104355  | -0.84881791078284 |
| C  | -5.18398905053710 | 1.55366733223878  | -0.28241303269783 |
| C  | -3.70713093331608 | 1.48388503416750  | -0.66924223708467 |
| O  | -3.06847928771156 | -0.00641682860491 | 1.19056312252178  |
| C  | -2.66844454113492 | 1.08428322597898  | 2.00268178038198  |
| C  | 2.58030620356524  | 0.95253632830338  | -1.59917294074127 |
| C  | 1.45780724124523  | 1.79549044388474  | -1.32611673397961 |
| C  | 1.50755797117552  | 2.14827676083147  | 0.05244085184289  |
| C  | 2.73340636053313  | 1.61475518649586  | 0.60055080665682  |
| C  | 3.39134140014831  | 0.88199124912890  | -0.39794335335566 |
| C  | 2.97990535826922  | 0.40304913555185  | -2.92891209263116 |
| C  | 0.49854266147516  | 2.31461854501359  | -2.34549894216320 |
| C  | 0.60081693563403  | 3.10301983475387  | 0.75707454295431  |
| C  | 3.24286768609707  | 1.87291371059150  | 1.98025125112857  |
| C  | 4.71001389487079  | 0.19367365752224  | -0.29764599402613 |
| Cl | 2.36725903546715  | -2.27968902765985 | -0.77852245858338 |
| H  | 0.05162193758927  | -2.50109688711167 | -1.80999538728526 |
| H  | -1.66457912806237 | -2.12204454299325 | -1.90706272096152 |
| H  | -0.76948953515392 | -4.25654025920164 | -0.44532695247836 |
| H  | -2.13013131451250 | -3.30083527742968 | 0.12416513819160  |
| H  | -1.61943595464925 | 0.38116526765608  | -1.83605792583439 |
| H  | -1.14838759566061 | 1.15721734099301  | -0.35212501225656 |
| H  | -3.39922080380402 | -1.93846156893845 | -0.43465929094210 |
| H  | -3.73138931232293 | -1.00721078267068 | -1.88613125159100 |
| H  | -5.83193965783456 | -1.79857966121474 | -0.86706231760502 |
| H  | -5.40132296765220 | -1.06118430216296 | 0.66770797453475  |
| H  | -5.96201911545683 | 0.42404788463011  | -1.94353215690450 |
| H  | -7.00021239652407 | 0.40015385201578  | -0.52702085625218 |
| H  | -5.28151030883438 | 1.55716664091636  | 0.80660415422445  |
| H  | -5.61075970622388 | 2.49415487538854  | -0.64027273827629 |
| H  | -3.16045880839707 | 2.33754239052046  | -0.26183161178657 |
| H  | -3.61789864007902 | 1.55935951569458  | -1.75694474507560 |
| H  | -3.37508568242972 | 1.91708515029000  | 1.95375713570323  |
| H  | -1.67119086515407 | 1.45303188151848  | 1.75079933397480  |
| H  | -2.64473865338718 | 0.70867809588150  | 3.02481829075145  |



|   |                   |                   |                   |
|---|-------------------|-------------------|-------------------|
| H | -0.44748158803212 | 2.61899439588624  | -1.90294845288071 |
| H | 0.28760244739858  | 1.57325061220027  | -3.11507868645171 |
| H | 0.92605878031733  | 3.19129594321215  | -2.84182086259875 |
| H | 2.43292018406739  | 2.03141072293484  | 2.68754779882261  |
| H | 3.86836401955667  | 2.77077010339006  | 1.98016531912451  |
| H | 3.84961977316627  | 1.04589421787936  | 2.34523168009571  |
| H | 5.48137289261082  | 0.76834509097689  | -0.81946585718217 |
| H | 4.66050490523288  | -0.80029349900050 | -0.74068352695263 |
| H | 5.01944658425415  | 0.07930068058867  | 0.73996138975592  |
| H | 2.12214310647220  | 0.30345548550609  | -3.59307418491255 |
| H | 3.43043647315770  | -0.58152055644395 | -2.81988999909846 |
| H | 3.70518693939738  | 1.06570370523910  | -3.41217898169387 |
| H | -0.70630026949042 | -3.09421441302177 | 2.03116072837023  |
| H | 0.74766470414877  | -3.17833362939350 | 1.03816120305986  |
| H | 1.02638223627722  | 4.11158063069189  | 0.75556629363416  |
| H | 0.44693570879309  | 2.81210820310691  | 1.79503302931335  |
| H | -0.37393304869956 | 3.16265377848144  | 0.27450295857701  |
| F | 1.80213798861108  | -1.53543481266867 | 2.40903192433442  |
| H | -1.03944202560996 | -0.77493636860863 | 1.55018324248801  |
| F | 0.73646539534570  | 0.31919754707883  | 2.61730957240091  |

### TS<sub>A'B</sub>

|    |                   |                   |                   |
|----|-------------------|-------------------|-------------------|
| C  | -0.33058936168007 | -2.79988378277527 | 0.96857582303268  |
| C  | -0.98691789497187 | -3.26278342410221 | -0.34090068523530 |
| C  | -0.78852884903920 | -2.12325196984522 | -1.35386086197864 |
| C  | -0.55252439719938 | -0.84273422960218 | -0.55190765717800 |
| C  | -0.28069849269652 | -1.26320145629122 | 0.93620197757408  |
| Ru | 1.36412981430513  | -0.15804770147910 | -0.10666606009072 |
| C  | 1.07962775450082  | -0.72087167508025 | 1.71536257784650  |
| C  | -1.55128698578040 | 0.28295400089330  | -0.77268087678485 |
| C  | -3.00832034317056 | 0.21000583489556  | -0.23167778978093 |
| C  | -3.78973755071847 | -1.01740299056961 | -0.70506614297567 |
| C  | -5.26182089576398 | -0.98157012201497 | -0.28894333173632 |
| C  | -5.95481785248969 | 0.29345483852143  | -0.76561680262969 |
| C  | -5.20199669029582 | 1.53170045145779  | -0.27938261608030 |
| C  | -3.73555076038298 | 1.48290296701721  | -0.70647994543143 |
| O  | -3.02656561950831 | 0.10347246297215  | 1.20923093627695  |
| C  | -2.59880661543646 | 1.22315520865468  | 1.96443507456817  |
| C  | 2.56723891166727  | 0.94496358849489  | -1.61663569744110 |
| C  | 1.44874272391986  | 1.78775685415634  | -1.36866125727667 |

|    |                   |                   |                   |
|----|-------------------|-------------------|-------------------|
| C  | 1.47940345453365  | 2.17026811846291  | 0.00686627668330  |
| C  | 2.68126242591399  | 1.63118802249807  | 0.58337237736308  |
| C  | 3.35141305342498  | 0.87063872879107  | -0.39812652961165 |
| C  | 2.97614505298458  | 0.36435718394847  | -2.92958950316559 |
| C  | 0.49808405981555  | 2.28838935927379  | -2.40526950736650 |
| C  | 0.57614679025608  | 3.15222038241673  | 0.67770358852956  |
| C  | 3.17053635849539  | 1.90787841436517  | 1.96697375385407  |
| C  | 4.67402229394377  | 0.19332090140876  | -0.27057327702729 |
| Cl | 2.35117908353431  | -2.28140200257918 | -0.75952154243338 |
| H  | 0.08006269018734  | -2.32995129720596 | -1.97530402623960 |
| H  | -1.64937490722326 | -2.01393133388490 | -2.01231046587040 |
| H  | -0.54128425691929 | -4.19339093261321 | -0.69248531834476 |
| H  | -2.04998097312058 | -3.45267903201152 | -0.18432005113345 |
| H  | -1.63215388890797 | 0.43545480219669  | -1.85049964797264 |
| H  | -1.13833987117039 | 1.20387706668911  | -0.36834065536754 |
| H  | -3.31968402306486 | -1.91272756837432 | -0.30543680338510 |
| H  | -3.71826710123063 | -1.07029348039822 | -1.79500363329823 |
| H  | -5.77040830077476 | -1.86262791911436 | -0.68823545644168 |
| H  | -5.32355541953182 | -1.04382192254905 | 0.79992978877171  |
| H  | -5.99155475524908 | 0.30134718513660  | -1.86140938558609 |
| H  | -6.99013815268803 | 0.31760835440607  | -0.41680943659780 |
| H  | -5.26771528039472 | 1.58589995575429  | 0.81070421866313  |
| H  | -5.66638051599400 | 2.44091252912600  | -0.66964924273665 |
| H  | -3.20108145063312 | 2.37090454350477  | -0.36065026599833 |
| H  | -3.67917085088992 | 1.50243036269773  | -1.79873843554734 |
| H  | -3.26829618521503 | 2.08016653743345  | 1.85116406656840  |
| H  | -1.58187472667452 | 1.53332525013462  | 1.71392872510582  |
| H  | -2.61204500654313 | 0.90760551336280  | 3.00675487856011  |
| H  | -0.45057867379771 | 2.60379633948245  | -1.97659866190591 |
| H  | 0.29223962888784  | 1.53358954797089  | -3.16293355670712 |
| H  | 0.93163052965876  | 3.15507126011231  | -2.91361597408649 |
| H  | 2.34890546127549  | 2.04471399543292  | 2.66607262592170  |
| H  | 3.77093139066968  | 2.82266864921739  | 1.97103234125672  |
| H  | 3.79589799693052  | 1.09860857052587  | 2.33984599041669  |
| H  | 5.45761489239628  | 0.79478134720189  | -0.74193097427955 |
| H  | 4.65433275993711  | -0.78561375442703 | -0.74674767101745 |
| H  | 4.94474046655106  | 0.04643489176645  | 0.77387439450993  |
| H  | 2.13089088032438  | 0.29091320279545  | -3.61288788099453 |
| H  | 3.38424764288050  | -0.63614816641759 | -2.79799610284218 |
| H  | 3.73880528647664  | 0.99105361115139  | -3.40286938159169 |

|   |                   |                   |                  |
|---|-------------------|-------------------|------------------|
| H | -0.89133751960236 | -3.11487902281176 | 1.84995700900866 |
| H | 0.67156197934875  | -3.20443327016195 | 1.04694143538132 |
| H | 1.00811425394126  | 4.15763870915912  | 0.64547926779966 |
| H | 0.41947296185223  | 2.89655908803519  | 1.72491796480349 |
| H | -0.39788913718005 | 3.20402126321603  | 0.19301534106466 |
| F | 1.71434581553641  | -1.68097259553399 | 2.40391601775335 |
| H | -1.05127836985632 | -0.77951001604263 | 1.52638294138067 |
| F | 0.73648378374566  | 0.20444615754791  | 2.66984802697421 |

## B

|    |                   |                   |                   |
|----|-------------------|-------------------|-------------------|
| C  | -0.43017850187981 | -2.98785560769875 | -0.22293889848120 |
| C  | -0.12091143437511 | -2.68659440623811 | -1.69671375511544 |
| C  | -0.86221125533411 | -1.36796355207041 | -1.96157841759782 |
| C  | -0.94395220111132 | -0.69579271422609 | -0.59773128611449 |
| C  | -0.66346759992187 | -1.62465916092483 | 0.36765269839563  |
| Ru | 1.38638377580919  | -0.10092907276237 | 0.33737963096257  |
| C  | 0.96741723356763  | 0.01191400340416  | 2.15343760756063  |
| C  | -1.76633426395992 | 0.55424675154562  | -0.41233963344955 |
| C  | -3.19425483653930 | 0.33737932374193  | 0.14870061535102  |
| C  | -3.97842266965914 | -0.72063017633170 | -0.63277163684325 |
| C  | -5.42682703572336 | -0.84764516982679 | -0.15817202134979 |
| C  | -6.15405475092262 | 0.49616137109599  | -0.20198267664694 |
| C  | -5.39053352473524 | 1.55752293275900  | 0.59118512572771  |
| C  | -3.94858359735605 | 1.67707684244489  | 0.09906321575530  |
| O  | -3.13403060459438 | -0.18557161974488 | 1.48801129648990  |
| C  | -2.61700910748231 | 0.65530390403406  | 2.50131327138004  |
| C  | 2.80135438045090  | 0.35350267414355  | -1.48841128074347 |
| C  | 1.68333187983552  | 1.16711785616504  | -1.71672844192709 |
| C  | 1.46829908788653  | 2.00193842344230  | -0.56070868473794 |
| C  | 2.55617516362987  | 1.77649766033904  | 0.33761297410186  |
| C  | 3.34887639433621  | 0.71292183020914  | -0.19017715185479 |
| C  | 3.39574234361779  | -0.66744410416452 | -2.39923333098526 |
| C  | 0.92411611797801  | 1.29980639641504  | -2.99239036169940 |
| C  | 0.51365910326087  | 3.15005405130505  | -0.48341427348161 |
| C  | 2.93494786271574  | 2.64914840429125  | 1.48857915732145  |
| C  | 4.65967299879302  | 0.24243253467169  | 0.34319075463194  |
| Cl | 2.49084319272195  | -2.23761950336102 | 0.63515226052976  |
| H  | -0.40480066347104 | -0.75796149177816 | -2.73357954169441 |
| H  | -1.89093368278742 | -1.55897441419393 | -2.28907230187518 |
| H  | 0.95406395691655  | -2.54124782161601 | -1.80452168925462 |

|   |                   |                   |                   |
|---|-------------------|-------------------|-------------------|
| H | -0.42706882139359 | -3.48558081483799 | -2.37156562615071 |
| H | -1.86256173597768 | 1.06382016298077  | -1.37278230803980 |
| H | -1.26199992523529 | 1.25147178711789  | 0.24883679540900  |
| H | -3.46798345812909 | -1.67953127406671 | -0.53492393937166 |
| H | -3.96087698992172 | -0.44671398432041 | -1.69216832397556 |
| H | -5.94919139066001 | -1.58221792485684 | -0.77617224101460 |
| H | -5.43042500677901 | -1.23015245017687 | 0.86482504645604  |
| H | -6.24942104067902 | 0.82540979499436  | -1.24358252377817 |
| H | -7.16961628916787 | 0.39039918030952  | 0.18730088339331  |
| H | -5.39490739029272 | 1.28670259045228  | 1.65040332779088  |
| H | -5.88807397250611 | 2.52720151434937  | 0.50984454560079  |
| H | -3.40321144573692 | 2.43432028562484  | 0.66742883367902  |
| H | -3.94948092988863 | 2.01842726126224  | -0.94056048514571 |
| H | -3.29237220479526 | 1.48397261976558  | 2.73587194205007  |
| H | -1.63529690870651 | 1.06572807562925  | 2.24797437998321  |
| H | -2.50668707460293 | 0.03261971133888  | 3.38769572604163  |
| H | -0.14264831778891 | 1.44197744402309  | -2.82825201843985 |
| H | 1.06327931515987  | 0.44180843333499  | -3.64641826350066 |
| H | 1.28752462974187  | 2.18209088298663  | -3.52890522870668 |
| H | 2.07078956317648  | 3.13819790932070  | 1.93081276744101  |
| H | 3.61847592572374  | 3.42698207898185  | 1.13391313734058  |
| H | 3.44312569868079  | 2.09168066614349  | 2.27208773106154  |
| H | 5.47740618535869  | 0.78549441708880  | -0.14193296596534 |
| H | 4.79227948037509  | -0.82236363114163 | 0.16655787632472  |
| H | 4.73248497272212  | 0.40893015468455  | 1.41661389738506  |
| H | 2.73352171596694  | -0.89626655802187 | -3.23335122222755 |
| H | 3.58735774188380  | -1.59330668516337 | -1.85451675543285 |
| H | 4.34580262559313  | -0.31589276524197 | -2.81235815745155 |
| H | -1.37167735662788 | -3.54530133319357 | -0.12341829622940 |
| H | 0.35135100534687  | -3.55455178576684 | 0.27559979247112  |
| H | 0.98184676159976  | 4.06603482332143  | -0.85927767136223 |
| H | 0.20130741172219  | 3.34068925870676  | 0.54321184695790  |
| H | -0.38159284323271 | 2.97495646721371  | -1.07620615635153 |
| F | 0.56019697498589  | -0.94621139723547 | 2.98607413785117  |
| H | -0.94603444597565 | -1.50960585372411 | 1.39834206627309  |
| F | 1.10103177839370  | 1.08172779304641  | 2.95574422527823  |

**C (secondary carbene)**

|   |                  |                   |                  |
|---|------------------|-------------------|------------------|
| C | 6.53496038427883 | 10.03341218496046 | 4.21325836925002 |
| C | 5.88145431248520 | 10.63797193376879 | 5.36682403885446 |

|    |                  |                   |                  |
|----|------------------|-------------------|------------------|
| C  | 5.23209311372532 | 11.80656474994531 | 4.93841350145830 |
| C  | 5.47147042089409 | 11.95882478547087 | 3.51034535305889 |
| C  | 6.18957533896025 | 10.80668182662210 | 3.06125830518526 |
| Ru | 7.40998531439757 | 11.98919992007644 | 4.45973953858448 |
| Cl | 8.15085006813714 | 13.18415030948829 | 6.30273424897043 |
| C  | 5.96064038463012 | 10.11064053136538 | 6.75932370249519 |
| C  | 4.48178072098552 | 12.78108804508976 | 5.78186616595497 |
| C  | 4.89957511093847 | 13.03407387546377 | 2.65090048292376 |
| C  | 6.50738932519434 | 10.46751107563261 | 1.64192994754959 |
| C  | 7.26017264191505 | 8.73076261610125  | 4.21861803115473 |
| C  | 8.74741077340160 | 12.17203284044716 | 3.13382312926098 |
| F  | 8.71057002154725 | 12.98867171706813 | 2.07924332274323 |
| F  | 9.70283086487906 | 11.28685964412937 | 2.84366448640426 |
| H  | 5.49652524179623 | 13.18149740579697 | 1.75251936926014 |
| H  | 4.85816480657641 | 13.98221429033630 | 3.18503128931248 |
| H  | 3.88039846169693 | 12.77846585097973 | 2.34265833308045 |
| H  | 7.96037797319711 | 8.66383922734525  | 3.38766011853039 |
| H  | 6.55439979579247 | 7.89780446530411  | 4.13435563432472 |
| H  | 7.82350127403066 | 8.59806430911244  | 5.14114638086165 |
| H  | 5.19720516098602 | 9.34423991562527  | 6.92302001846353 |
| H  | 5.81368621212731 | 10.90183344964768 | 7.49148320046220 |
| H  | 6.93372158603555 | 9.66046390929261  | 6.95225433698007 |
| H  | 3.40460958831035 | 12.60780125195657 | 5.70193087949216 |
| H  | 4.68149262956995 | 13.80519847313439 | 5.46829456204071 |
| H  | 4.76494673257811 | 12.69834285185267 | 6.82890347919134 |
| H  | 7.41987055194173 | 9.87826196075993  | 1.56386512299317 |
| H  | 6.63210382992957 | 11.36186504610160 | 1.03340488451853 |
| H  | 5.69334335906146 | 9.87975953712407  | 1.20844376663968 |

### TS<sub>A</sub>'D

|    |                   |                   |                   |
|----|-------------------|-------------------|-------------------|
| C  | 0.31366243852167  | -3.14316887067340 | 1.15238336559721  |
| C  | -0.51127142178452 | -3.57074456392018 | -0.06928881148915 |
| C  | -0.38958883233159 | -2.41799791427238 | -1.08549579200046 |
| C  | -0.07460027452454 | -1.14062398873687 | -0.27109800540229 |
| C  | 0.15755704610844  | -1.62119555477847 | 1.19888621625325  |
| Ru | 1.93598811350299  | -0.44543867038160 | -0.28812428948795 |
| C  | 1.36412471040909  | -0.81997327554179 | 1.65192984026523  |
| C  | -1.07151436089124 | 0.00540762358731  | -0.45965944849395 |
| C  | -2.54449237462840 | -0.05661209147828 | 0.03807246087505  |
| C  | -3.33838670146273 | -1.26129088183008 | -0.47519085356859 |

|    |                   |                   |                   |
|----|-------------------|-------------------|-------------------|
| C  | -4.81906462200022 | -1.20745998632651 | -0.09280603244634 |
| C  | -5.48021109523886 | 0.08447944132025  | -0.56827196471789 |
| C  | -4.72098321333225 | 1.30215729131738  | -0.04243193494747 |
| C  | -3.24380030941267 | 1.23600928531107  | -0.42897199882793 |
| O  | -2.61032684884726 | -0.19100156766755 | 1.47829257343502  |
| C  | -2.22126729329841 | 0.91777899865297  | 2.26523718331252  |
| C  | 3.33330240896027  | 0.76988564188059  | -1.46586614406175 |
| C  | 2.08961772800296  | 1.50568693956075  | -1.23582415012756 |
| C  | 2.03512307959316  | 1.80034095592202  | 0.14506229527330  |
| C  | 3.23932028945983  | 1.25960809229366  | 0.75076012978572  |
| C  | 4.05409590652667  | 0.68815791764932  | -0.24760726943821 |
| C  | 3.80710081242392  | 0.29966930374191  | -2.80027268259107 |
| C  | 1.18672901014009  | 2.01971817672084  | -2.30582102389508 |
| C  | 1.09290539576238  | 2.75421451484257  | 0.80172229578550  |
| C  | 3.64327794694123  | 1.42394432879766  | 2.17826653042161  |
| C  | 5.37120392152282  | 0.01354093013359  | -0.05926644546288 |
| Cl | 2.80386192477530  | -2.49838154098626 | -1.00573154099733 |
| H  | 0.39819245131903  | -2.64022831763242 | -1.79935230724857 |
| H  | -1.30585474972849 | -2.29665640974294 | -1.66072015225444 |
| H  | -0.16193430532661 | -4.51934809503007 | -0.47930674775214 |
| H  | -1.55492251043712 | -3.70974940822330 | 0.22285416201728  |
| H  | -1.12307628528359 | 0.21726917362165  | -1.53138974691221 |
| H  | -0.65566129970696 | 0.90527378785509  | -0.01006657479664 |
| H  | -2.89439180065747 | -2.17273973063697 | -0.08135064653942 |
| H  | -3.24456178336687 | -1.29636921740384 | -1.56411218279176 |
| H  | -5.33226025588621 | -2.07504785888398 | -0.51570065240424 |
| H  | -4.90713353929031 | -1.28249215244416 | 0.99344395513040  |
| H  | -5.48687315015804 | 0.10907498964872  | -1.66457436596988 |
| H  | -6.52437901762731 | 0.12014364269887  | -0.24710984248021 |
| H  | -4.81714096953865 | 1.33965489798081  | 1.04597723827201  |
| H  | -5.16030151110399 | 2.22518439043393  | -0.43018570355331 |
| H  | -2.70554136543013 | 2.10805623184499  | -0.04895482100054 |
| H  | -3.15750593913808 | 1.27802693601110  | -1.51875958096996 |
| H  | -2.93751681220865 | 1.74273536562143  | 2.19952292424725  |
| H  | -1.22846280515914 | 1.28863428383129  | 2.00633169561762  |
| H  | -2.19281229799431 | 0.56528465322811  | 3.29572108461253  |
| H  | 0.19250961828349  | 2.23400016053623  | -1.92021749080029 |
| H  | 1.08344039278403  | 1.30228008308747  | -3.11963060141861 |
| H  | 1.59125430196282  | 2.94443174429075  | -2.73054702376331 |
| H  | 2.81446328469832  | 1.74329190831365  | 2.80154989116469  |

|   |                   |                   |                   |
|---|-------------------|-------------------|-------------------|
| H | 4.43061520020884  | 2.18095064355117  | 2.23988052844214  |
| H | 4.03870247920692  | 0.49799683240983  | 2.59253819162113  |
| H | 6.18133541570869  | 0.60486703583947  | -0.49535610731914 |
| H | 5.37325964050349  | -0.96783690832873 | -0.53601387130850 |
| H | 5.59211135876059  | -0.12950387453328 | 0.99694772397453  |
| H | 2.98429212715556  | -0.07190273504697 | -3.41033570200742 |
| H | 4.53680701875466  | -0.50014493070134 | -2.70272549553089 |
| H | 4.26987310535531  | 1.13280494347377  | -3.33950829711211 |
| H | -0.03072387751879 | -3.60560732787382 | 2.07801767179249  |
| H | 1.35651460059464  | -3.41728309461721 | 1.01182623509158  |
| H | 1.53795476888304  | 3.75412337356333  | 0.82770890683173  |
| H | 0.86566769058851  | 2.46426947911074  | 1.82360724681295  |
| H | 0.15537801480844  | 2.83161984199672  | 0.25431237406616  |
| F | 2.31721027758331  | -1.49606806238917 | 2.35694747930779  |
| H | -0.68508436465755 | -1.33134226414917 | 1.83049413596776  |
| F | 0.98419450816046  | 0.21563745354974  | 2.46934896591504  |

## D

|    |                   |                   |                   |
|----|-------------------|-------------------|-------------------|
| C  | -0.59420447260974 | -2.68672600338069 | 1.20271170080391  |
| C  | -0.56907385426307 | -2.91316514695610 | -0.32560641695113 |
| C  | -0.37825227732744 | -1.52626322859400 | -0.94406962703082 |
| C  | -0.70975900052772 | -0.49368801686364 | 0.05805848763867  |
| C  | -0.65546702192566 | -1.16304148112813 | 1.44494181112316  |
| Ru | 1.42044411563257  | -0.22265899144685 | -0.12110900032583 |
| C  | 0.65657957600723  | -0.53790092032586 | 1.81901611160666  |
| C  | -1.67605255157076 | 0.61687939089727  | -0.24269100232511 |
| C  | -3.18204848564663 | 0.34280900696662  | -0.01104958220572 |
| C  | -3.64141134692152 | -0.95507057803201 | -0.68075940970997 |
| C  | -5.15331234005821 | -1.16701740066568 | -0.58167995248854 |
| C  | -5.93167570737928 | 0.02837867835313  | -1.13121455728574 |
| C  | -5.49232500355482 | 1.32749224485108  | -0.45408958110066 |
| C  | -3.98345003421781 | 1.52510312172056  | -0.58711982486511 |
| O  | -3.48699034246196 | 0.14332888762869  | 1.38168273769066  |
| C  | -3.22788707914542 | 1.20942275415750  | 2.27714619947865  |
| C  | 2.61491405101169  | 0.85581613796799  | -1.84094199378941 |
| C  | 1.49348302600020  | 1.63543249702585  | -1.38519883280266 |
| C  | 1.70272650033790  | 1.95934099865150  | -0.00560223371301 |
| C  | 2.90422094612494  | 1.28846103011038  | 0.41464428988491  |
| C  | 3.48894986308507  | 0.67506276185847  | -0.75451038643992 |
| C  | 2.82531502936473  | 0.37018813602746  | -3.23780122928958 |

|    |                   |                   |                   |
|----|-------------------|-------------------|-------------------|
| C  | 0.47573479212210  | 2.24393983441777  | -2.29511816821609 |
| C  | 0.96706482274434  | 2.99860975332267  | 0.77229847464867  |
| C  | 3.56173308452128  | 1.39671994966266  | 1.75112582854188  |
| C  | 4.80481438745415  | -0.01882085956064 | -0.79254135853153 |
| Cl | 2.70128462516517  | -2.23240727453995 | 0.24307860144262  |
| H  | 0.76344139131451  | -1.46324148094512 | -1.26209178171503 |
| H  | -0.83275892996864 | -1.36729562617919 | -1.92153366468973 |
| H  | 0.22048027572633  | -3.60180381438036 | -0.61951766744797 |
| H  | -1.51729925813754 | -3.32085051098096 | -0.67987971198969 |
| H  | -1.56792169108368 | 0.90410079676333  | -1.28755804832031 |
| H  | -1.41321811427255 | 1.49478711251533  | 0.34631435068458  |
| H  | -3.12036707337647 | -1.79238380378490 | -0.21755989550462 |
| H  | -3.33981450868733 | -0.92526441770833 | -1.73271732978935 |
| H  | -5.42900963136144 | -2.07847816897456 | -1.11819226549742 |
| H  | -5.41771786081349 | -1.32107115309450 | 0.46666930190690  |
| H  | -5.75903772508422 | 0.11073052937965  | -2.21107422454363 |
| H  | -7.00515754874745 | -0.12561498690374 | -0.99672751697330 |
| H  | -5.76368846294206 | 1.29355333417976  | 0.60433400453121  |
| H  | -6.01633882932303 | 2.18170982751033  | -0.89023086041776 |
| H  | -3.66805126027253 | 2.45814219708943  | -0.11410712768184 |
| H  | -3.72354946295867 | 1.61860808591306  | -1.64598913716882 |
| H  | -3.79186347912153 | 2.11226248536626  | 2.02374760358124  |
| H  | -2.16392371204716 | 1.45498666048312  | 2.33682234424589  |
| H  | -3.55393599268135 | 0.86385988773274  | 3.25721256147458  |
| H  | -0.34011399601649 | 2.70025054470212  | -1.74115084815617 |
| H  | 0.05216556125375  | 1.51230384751446  | -2.98416397933333 |
| H  | 0.94264716037231  | 3.02680374867489  | -2.90054057894406 |
| H  | 2.82891686411072  | 1.59822688317499  | 2.52918156947822  |
| H  | 4.30240687719285  | 2.20245502265907  | 1.75667222003570  |
| H  | 4.06665179305432  | 0.46724786388028  | 2.01020423361269  |
| H  | 5.58618635740475  | 0.70520570891090  | -1.04683828730465 |
| H  | 4.81952247356810  | -0.81424894995578 | -1.53465897660486 |
| H  | 5.04682910052901  | -0.46227808554453 | 0.16952937898739  |
| H  | 1.87673897635860  | 0.18976883614440  | -3.74342309778947 |
| H  | 3.39592223863249  | -0.55753471942584 | -3.25219171663060 |
| H  | 3.37571024534589  | 1.10878211595526  | -3.82917497598231 |
| H  | -1.46264309511493 | -3.16708042396834 | 1.65199776756507  |
| H  | 0.29300525178222  | -3.10666253713187 | 1.66932050101819  |
| H  | 1.41338408256089  | 3.97920229762296  | 0.57826383586658  |
| H  | 1.01580015636388  | 2.80575846827178  | 1.83920015605101  |



|   |                   |                   |                  |
|---|-------------------|-------------------|------------------|
| H | -0.08232026651190 | 3.05617504254985  | 0.48963104991935 |
| F | 1.39905914445847  | -1.22248820665068 | 2.73900552457272 |
| H | -1.46244808980499 | -0.88861342556497 | 2.12045383355344 |
| F | 0.37688073633707  | 0.68138373207366  | 2.46656636961118 |

**TS<sub>DE</sub>**

|    |                   |                   |                   |
|----|-------------------|-------------------|-------------------|
| C  | -0.56285381462822 | -3.06083153953292 | 1.01047263441274  |
| C  | -0.55214932485141 | -3.03428737452206 | -0.53356185462179 |
| C  | -0.40469931603195 | -1.56147060667888 | -0.95345688159437 |
| C  | -0.65488660918489 | -0.69997384451767 | 0.27998849693064  |
| C  | -0.90959530265441 | -1.64428543727767 | 1.47293480234017  |
| Ru | 1.58118177543643  | -0.14203350828747 | -0.40705186374989 |
| C  | 0.21840069625243  | -0.76673590399073 | 1.74779929121584  |
| C  | -1.52824556139036 | 0.53000167156624  | 0.09408513628669  |
| C  | -3.05724593169739 | 0.35962300342551  | 0.25555173219194  |
| C  | -3.60659352962660 | -0.85402045380788 | -0.50156608943949 |
| C  | -5.13230445750595 | -0.94395033015116 | -0.44401172942729 |
| C  | -5.78969921402602 | 0.33682504138485  | -0.95694499540624 |
| C  | -5.26511203599405 | 1.55957391978635  | -0.20346877647436 |
| C  | -3.74011775001841 | 1.63419104801234  | -0.27350520541149 |
| O  | -3.41243059627891 | 0.10995946069094  | 1.63233255671996  |
| C  | -3.24372756543774 | 1.16448551639442  | 2.56259839564991  |
| C  | 2.76635804870222  | 0.80002638154674  | -1.91087433691506 |
| C  | 1.56114921447004  | 1.58147212271441  | -1.70640644146280 |
| C  | 1.55730864828766  | 2.04742232641091  | -0.35964236377509 |
| C  | 2.73314564091095  | 1.51860149660470  | 0.29169810159025  |
| C  | 3.50179934556049  | 0.80651174830635  | -0.68527119110483 |
| C  | 3.20951092450760  | 0.18290126650074  | -3.19557481635346 |
| C  | 0.57852516354657  | 1.93053414983763  | -2.77513606428271 |
| C  | 0.63327883104136  | 3.04836483826891  | 0.25018622781206  |
| C  | 3.13451376571752  | 1.78553325157956  | 1.70392891978031  |
| C  | 4.83193927130940  | 0.17547572705988  | -0.45749979278834 |
| Cl | 2.67038423710259  | -2.32285987115539 | -0.18999340133271 |
| H  | 0.57309114808608  | -1.42096118170558 | -1.49331901382662 |
| H  | -1.13192725186114 | -1.26495319067381 | -1.70743811099831 |
| H  | 0.25902135817420  | -3.64085677738089 | -0.92803812278395 |
| H  | -1.49329319139361 | -3.41909334808055 | -0.93094014864493 |
| H  | -1.34324221233770 | 0.90888633728946  | -0.90902870065553 |
| H  | -1.21414316031540 | 1.31709560011094  | 0.76902686932521  |
| H  | -3.16545846566311 | -1.76349010525475 | -0.09410809915026 |

|   |                   |                   |                   |
|---|-------------------|-------------------|-------------------|
| H | -3.28691525907547 | -0.77890822130744 | -1.54515604809910 |
| H | -5.46748517744485 | -1.80361188427950 | -1.02958931634096 |
| H | -5.43761437187227 | -1.12176184220450 | 0.58933355095463  |
| H | -5.57515347362758 | 0.45317692160633  | -2.02591143042855 |
| H | -6.87610495268695 | 0.27024192157975  | -0.86100170206571 |
| H | -5.58341595176871 | 1.50114334236494  | 0.84061943152881  |
| H | -5.69590928129842 | 2.47590571072915  | -0.61457160277541 |
| H | -3.36652841220712 | 2.50911456701470  | 0.26384531559648  |
| H | -3.43444321607655 | 1.76406882753643  | -1.31593591949304 |
| H | -3.95621927472303 | 1.97786915564749  | 2.39620550172504  |
| H | -2.23002790457135 | 1.57126917253605  | 2.55761436665530  |
| H | -3.43284824068713 | 0.73364037374035  | 3.54481011486462  |
| H | -0.36737435852861 | 2.27157406003313  | -2.35645352427629 |
| H | 0.37212823087304  | 1.07647585007465  | -3.42107192716278 |
| H | 0.96700194364568  | 2.73415202584738  | -3.40855350035372 |
| H | 2.26245114924642  | 1.87325525741018  | 2.35058911936306  |
| H | 3.70458595247766  | 2.71784085902413  | 1.77615370237554  |
| H | 3.75467627634750  | 0.98027066695451  | 2.09382891766123  |
| H | 5.62477519112066  | 0.90026385199740  | -0.66883046555407 |
| H | 4.97263670858229  | -0.69341290288986 | -1.09556539814455 |
| H | 4.93863792423091  | -0.16039660169721 | 0.57190591734296  |
| H | 2.35767587112816  | -0.06591240990251 | -3.82849630225278 |
| H | 3.76584730868764  | -0.73494217518152 | -3.01279212370616 |
| H | 3.85305222243026  | 0.86779288479132  | -3.75729937296184 |
| H | -1.29424623492595 | -3.76776408004883 | 1.40014064618604  |
| H | 0.41783880788963  | -3.35372069472963 | 1.38046750889172  |
| H | 1.11257996189161  | 4.03238696307123  | 0.26579351992540  |
| H | 0.38512359135315  | 2.79171638227687  | 1.28002462130280  |
| H | -0.29437537489288 | 3.14548504826018  | -0.31007915061308 |
| F | 1.36455760774115  | -1.27484115412241 | 2.25073113065785  |
| H | -1.81165701276619 | -1.48616226167729 | 2.04861798111381  |
| F | -0.06520702870096 | 0.34773095107105  | 2.48627227402652  |

## E

|    |                   |                   |                   |
|----|-------------------|-------------------|-------------------|
| C  | -1.17620703653748 | -3.08935683965288 | 1.05702800605771  |
| C  | -0.47776213187112 | -2.98944815742721 | -0.31444609413182 |
| C  | -0.81899211553679 | -1.59480545620703 | -0.87393917561545 |
| C  | -1.22288127702915 | -0.70859092081157 | 0.30385505249101  |
| C  | -1.37965039625273 | -1.66612681457653 | 1.53439961753073  |
| Ru | 2.61129328278189  | -0.17931509594847 | -0.32065291459966 |

|    |                   |                   |                   |
|----|-------------------|-------------------|-------------------|
| C  | -0.27682646342852 | -0.70441468188653 | 1.43863902788704  |
| C  | -2.09125792892529 | 0.50613776078440  | 0.03603333662727  |
| C  | -3.60873118934929 | 0.35041688136620  | 0.25607143227396  |
| C  | -4.17250148504040 | -0.87900567321063 | -0.46415040316909 |
| C  | -5.69370059307949 | -0.98401701794040 | -0.34454136961579 |
| C  | -6.38581017810304 | 0.28582242959992  | -0.83980902495000 |
| C  | -5.84316697142511 | 1.52194349622402  | -0.12113058622486 |
| C  | -4.32353568541583 | 1.61184324161575  | -0.25733646900433 |
| O  | -3.90293443786444 | 0.11083841203830  | 1.64877310459783  |
| C  | -3.65760975418233 | 1.15984385938779  | 2.56701633118028  |
| C  | 3.40421926086197  | 0.87489376118495  | -1.94719941360448 |
| C  | 2.12590615543871  | 1.45523754011563  | -1.59512362613847 |
| C  | 2.21106203491790  | 1.96495122968387  | -0.26021931170379 |
| C  | 3.51564922517226  | 1.66155919606025  | 0.24215954129413  |
| C  | 4.26719646033757  | 1.00484750355807  | -0.80638744570502 |
| C  | 3.77094327992564  | 0.29528064433065  | -3.27148409662100 |
| C  | 0.95267915998096  | 1.57636052931011  | -2.50867051213607 |
| C  | 1.14544405071436  | 2.71174077410010  | 0.47064136499897  |
| C  | 4.03598060905039  | 2.01680849536417  | 1.59446372785794  |
| C  | 5.69231119571286  | 0.57348851074319  | -0.72592759211970 |
| Cl | 3.20028173544717  | -2.42564811868909 | -0.54551645400392 |
| H  | 0.02402878908241  | -1.16824324220834 | -1.42424655717324 |
| H  | -1.66304826822883 | -1.63880508265023 | -1.56276614548844 |
| H  | 0.59912086822563  | -3.08882256545747 | -0.20035582098584 |
| H  | -0.80434145938981 | -3.78033768559152 | -0.98935713696224 |
| H  | -1.93870508512304 | 0.79979557122107  | -1.00477990687271 |
| H  | -1.74645867902682 | 1.34941438268335  | 0.63436818320717  |
| H  | -3.70131115389030 | -1.77476625580771 | -0.05922360515094 |
| H  | -3.89151244877728 | -0.81380100426921 | -1.51962951111218 |
| H  | -6.04375703309821 | -1.85169209116397 | -0.90932428688423 |
| H  | -5.95530566910764 | -1.15661807653611 | 0.70170238387851  |
| H  | -6.21840441388269 | 0.39456486462873  | -1.91795625072927 |
| H  | -7.46645079272465 | 0.20880050321351  | -0.69695728513938 |
| H  | -6.11412586470793 | 1.47056616294912  | 0.93682161164800  |
| H  | -6.30223410939348 | 2.42903278423776  | -0.52201755811228 |
| H  | -3.93718342965982 | 2.49689161707057  | 0.25382469917850  |
| H  | -4.06224420856816 | 1.73308339643552  | -1.31289684169446 |
| H  | -4.31503872880135 | 2.01861773012945  | 2.40114900266224  |
| H  | -2.61847630033475 | 1.49958097804052  | 2.54958126001259  |
| H  | -3.86746382364155 | 0.75134097484150  | 3.55479352054391  |

|   |                   |                   |                   |
|---|-------------------|-------------------|-------------------|
| H | 0.01941518807374  | 1.63394508786294  | -1.95070148632384 |
| H | 0.88693097068085  | 0.72506235444128  | -3.18573002794458 |
| H | 1.03159691975641  | 2.48168847477374  | -3.11954724181545 |
| H | 3.23470013460724  | 2.03872805102985  | 2.33252365884472  |
| H | 4.50666705791643  | 3.00558590276360  | 1.58098255039121  |
| H | 4.78206325577599  | 1.29830370816716  | 1.93223333223847  |
| H | 6.35856764307962  | 1.38500691463517  | -1.03642481160408 |
| H | 5.87844379906993  | -0.28581573542287 | -1.36763024256562 |
| H | 5.96053873364454  | 0.28867889143353  | 0.29079435671400  |
| H | 2.90449189872037  | -0.15021181342009 | -3.75923205121795 |
| H | 4.52213526420675  | -0.48498977809729 | -3.16290669282019 |
| H | 4.17214266093011  | 1.06815582045499  | -3.93528194408667 |
| H | -2.16066600283602 | -3.55480123539446 | 0.96802013336139  |
| H | -0.59852791772392 | -3.68681320545989 | 1.76435031189949  |
| H | 1.28891396679500  | 3.79175641633612  | 0.36246746890344  |
| H | 1.14909159760369  | 2.47834673418737  | 1.53413603273598  |
| H | 0.15635268225493  | 2.47119170528037  | 0.08507391571270  |
| F | 1.03404810594961  | -1.11672680999744 | 1.28893090697879  |
| H | -2.13421580667866 | -1.45098311648952 | 2.27658750359149  |
| F | -0.26764414707885 | 0.35642118203182  | 2.28827351872761  |

**F (cyclopropanation product)**

|   |                   |                   |                  |
|---|-------------------|-------------------|------------------|
| C | 7.92432827998223  | 15.48541355375569 | 5.77420810497634 |
| C | 8.51007611072068  | 15.48509035398042 | 7.20031779344095 |
| C | 8.98439887676562  | 14.04255234696128 | 7.45799183975719 |
| C | 9.29344401333167  | 13.42007628701306 | 6.09906793793697 |
| C | 8.63657028635046  | 14.36701510902512 | 5.04137313207911 |
| C | 10.10101943399163 | 14.24105252859513 | 5.16605750038052 |
| C | 9.25724030445791  | 11.91818566653094 | 5.93700912230000 |
| C | 10.28117730417043 | 11.12048419659452 | 6.76796391615704 |
| C | 11.70483068685927 | 11.64616282063905 | 6.55638059737773 |
| C | 12.75838627363543 | 10.79739768438839 | 7.26901177310259 |
| C | 12.66714663260856 | 9.32715338047766  | 6.86111916312193 |
| C | 11.25640742406883 | 8.78383022771188  | 7.09137236399046 |
| C | 10.21578340839005 | 9.63760085593630  | 6.36707136252201 |
| O | 10.04493987252489 | 11.29675278473733 | 8.18295880153017 |
| C | 8.88682825774898  | 10.70959653672965 | 8.73664087093514 |
| H | 9.83165480271439  | 13.99413464761954 | 8.13992283711270 |
| H | 8.18349314705151  | 13.45320943071404 | 7.90950772749946 |
| H | 9.35231889716401  | 16.17205072531842 | 7.25582226660182 |

|   |                   |                   |                  |
|---|-------------------|-------------------|------------------|
| H | 7.77748625766705  | 15.80802484327877 | 7.94026744382906 |
| H | 9.42082763042496  | 11.66889167468404 | 4.88799396758478 |
| H | 8.24958430091201  | 11.56722149517682 | 6.17837297662369 |
| H | 11.75708907943410 | 12.67805041041876 | 6.90615601933739 |
| H | 11.90560157825477 | 11.66462114179951 | 5.48247235802466 |
| H | 13.75272452488918 | 11.19198391330424 | 7.04572688384097 |
| H | 12.61528303494511 | 10.88394517476480 | 8.34864059022662 |
| H | 12.92186235519674 | 9.22740510473099  | 5.79941620631603 |
| H | 13.39696924761710 | 8.73255301050991  | 7.41638776661047 |
| H | 11.04535278712304 | 8.77765922398126  | 8.16433262471967 |
| H | 11.18428023042970 | 7.74841541983555  | 6.74878044902897 |
| H | 9.20808181645611  | 9.24768453844290  | 6.53123899128216 |
| H | 10.39116232456340 | 9.58045619297089  | 5.28880414045037 |
| H | 7.97123687757914  | 10.99661626063771 | 8.20893021118817 |
| H | 8.81938834226660  | 11.07443153138206 | 9.76115592481076 |
| H | 8.94403013178656  | 9.61655488296667  | 8.76013912406436 |
| H | 6.85593924803172  | 15.25601442395035 | 5.79345581619700 |
| H | 8.03979886859044  | 16.45292251524117 | 5.28227130719535 |
| F | 10.88977621529908 | 15.26355497891515 | 5.59540582165650 |
| H | 8.19856809570320  | 13.94853231446197 | 4.14335284845863 |
| F | 10.75560604029321 | 13.60922081181777 | 4.15095241773212 |

### **Structures along the reaction profile for Substrate 1j**

#### **A**

|    |                  |                   |                  |
|----|------------------|-------------------|------------------|
| C  | 5.86129459575891 | 10.25795450816250 | 4.60456277899770 |
| C  | 5.47288500804508 | 10.86210710591403 | 5.81621717409795 |
| C  | 5.03779749366903 | 12.19243568942261 | 5.51793454124698 |
| C  | 4.99379067825580 | 12.32924305514698 | 4.06943428782784 |
| C  | 5.53569553979385 | 11.17356265208737 | 3.51410533639731 |
| Ru | 7.21127071826977 | 12.10926648193710 | 4.92403789839728 |
| Cl | 8.87458955390385 | 10.90756674188277 | 3.56763600526499 |
| C  | 5.43777171075083 | 10.22692856382241 | 7.16665634580755 |
| C  | 4.36654159713241 | 13.10837464763203 | 6.48725259048832 |
| C  | 4.38745850787339 | 13.47503498004069 | 3.33181820301983 |
| C  | 5.72854213693863 | 10.87002823685272 | 2.06781900666735 |
| C  | 6.33948969550593 | 8.85980984746082  | 4.41123798357319 |
| C  | 8.19459013671027 | 11.88393064876563 | 6.52769843885702 |
| C  | 8.25716299289124 | 12.83504711791766 | 7.68684559735155 |
| C  | 8.51042014356289 | 14.30322680128005 | 7.34600099963768 |

|   |                   |                   |                   |
|---|-------------------|-------------------|-------------------|
| C | 7.42398236834867  | 14.91499885581129 | 6.47821054132788  |
| C | 7.24141288199967  | 14.27576526150166 | 5.12857844467903  |
| C | 8.31276513275149  | 13.88449770399015 | 4.29910728386036  |
| C | 8.23303856104905  | 14.03990992765549 | 2.83356792747243  |
| O | 7.21745566745696  | 14.19027483528437 | 2.18340285173821  |
| C | 8.81434863376644  | 10.54984264863004 | 6.81925891069627  |
| C | 10.35249389626097 | 10.55653318772654 | 7.10290531395272  |
| C | 10.90183913054103 | 9.16234416785941  | 6.76123960886778  |
| C | 12.41754285328696 | 9.06777894022429  | 6.93087606971021  |
| C | 13.12389433307423 | 10.12456019325186 | 6.08084104182754  |
| C | 12.60773892933029 | 11.52369084554004 | 6.41549531410163  |
| C | 11.08762300718757 | 11.61282287739643 | 6.27225339887592  |
| O | 10.62954599876576 | 10.92118821383606 | 8.47355042343606  |
| C | 10.27852833914820 | 10.00333166181258 | 9.48648486848710  |
| O | 9.46454929335382  | 14.01817396663784 | 2.28850581167512  |
| C | 9.53527141836172  | 14.05306241584609 | 0.84602844993206  |
| H | 9.00455716849090  | 12.49373766915753 | 8.40531522352542  |
| H | 7.28601720728695  | 12.75092590397913 | 8.19663205664094  |
| H | 9.48236700805615  | 14.39630041383426 | 6.85669677639169  |
| H | 8.58684001692647  | 14.86645448493935 | 8.27909482643257  |
| H | 8.63769280839315  | 9.87036224583800  | 5.99270291544271  |
| H | 8.32455585629478  | 10.13122612819928 | 7.70604209423460  |
| H | 10.74969703216554 | 12.60206572847273 | 6.58320177342770  |
| H | 10.79309721907653 | 11.48257745231837 | 5.23028482058940  |
| H | 13.07293941602553 | 12.26434755516789 | 5.76018772138935  |
| H | 12.89126717489303 | 11.77940263187599 | 7.43966461595432  |
| H | 12.93984981374361 | 9.91385018316898  | 5.02165280173796  |
| H | 14.20522549766662 | 10.07198411938715 | 6.23173391049119  |
| H | 12.68604547551984 | 9.21146482506610  | 7.98154657307889  |
| H | 12.75308275006111 | 8.06547565417997  | 6.65236166563661  |
| H | 10.38961376639423 | 8.39927872802827  | 7.35324998044660  |
| H | 10.64316717423503 | 8.96844411482085  | 5.71765183474794  |
| H | 9.22097223665264  | 9.71683130168821  | 9.44892256256125  |
| H | 10.46300746900761 | 10.50783782172904 | 10.43435632263361 |
| H | 10.88390130180375 | 9.09287050128675  | 9.45122542063253  |
| H | 4.42913314068475  | 14.14796778935261 | 6.17130319141071  |
| H | 4.80458775837823  | 13.03343383964985 | 7.48192304685666  |
| H | 3.30438432735329  | 12.85696581699636 | 6.57517455514171  |
| H | 5.66940371279392  | 11.77671156867495 | 1.46834917389402  |
| H | 4.96370400100241  | 10.17236396505739 | 1.71251425945048  |

|   |                   |                   |                   |
|---|-------------------|-------------------|-------------------|
| H | 6.70601108936245  | 10.41707226601654 | 1.90019991238946  |
| H | 5.53679176699488  | 8.24290369943079  | 3.99597246436409  |
| H | 6.65562928180335  | 8.40878617159926  | 5.35074940027804  |
| H | 7.18367579670928  | 8.83296759299056  | 3.72290065070856  |
| H | 4.42492642983981  | 9.87666978229499  | 7.38691173148635  |
| H | 5.71670668104058  | 10.92717161982254 | 7.95367504558989  |
| H | 6.10308265618678  | 9.36838548471176  | 7.22665703595688  |
| H | 6.47513066845651  | 14.88589674662687 | 7.02003432347462  |
| H | 7.64453879257333  | 15.97796928750365 | 6.31815622087519  |
| H | 4.92189633942373  | 13.68455036160579 | 2.40940782947270  |
| H | 4.38995126191519  | 14.38712072742870 | 3.92718149897718  |
| H | 3.34298689500400  | 13.24878029568469 | 3.09500335589397  |
| H | 9.32262752622620  | 13.85057957960318 | 4.67867871244297  |
| H | 6.37440598511437  | 14.64192700935906 | 4.59360516374342  |
| H | 10.53417869446771 | 14.43408208594722 | 0.63739033685820  |
| C | 9.33308143031497  | 12.67307079844323 | 0.25183520104946  |
| H | 8.79417674045143  | 14.75931765634585 | 0.47313675013462  |
| H | 9.47211037256128  | 12.71766876585774 | -0.83128716619760 |
| H | 10.04617851222761 | 11.96461300880929 | 0.67219588610618  |
| H | 8.32843479267502  | 12.30864683571862 | 0.45908507537361  |

## A'

|    |                   |                   |                   |
|----|-------------------|-------------------|-------------------|
| C  | 1.22681535858602  | -0.34993117441757 | -2.19377219233018 |
| C  | 2.48713488197212  | -0.08629282076139 | -1.57251741797525 |
| C  | 2.94193721510694  | -1.27936437775768 | -0.94479153993387 |
| C  | 1.95843718257831  | -2.30955685015466 | -1.20655661872614 |
| C  | 0.93104998252099  | -1.73746419615828 | -1.99466947638566 |
| Ru | 1.08679193047449  | -0.72291138637662 | 0.11449336682463  |
| Cl | 1.78611987677028  | -1.91371024271608 | 2.12956987668277  |
| C  | 3.24785737774042  | 1.19242295721805  | -1.68723498791739 |
| C  | 4.25169326325307  | -1.49002973621508 | -0.26080451954504 |
| C  | 2.09253271476059  | -3.74262503612921 | -0.81346815528265 |
| C  | -0.19186937240454 | -2.50063227488420 | -2.61763121798284 |
| C  | 0.49747780463596  | 0.61282018008947  | -3.07241035101976 |
| C  | -0.87235758250326 | -0.93488026581517 | 0.56411952794347  |
| C  | -1.33889672136554 | -1.96266050486652 | 1.58691752478755  |
| C  | -1.33931419812436 | -1.31533673669775 | 2.98194314354441  |
| C  | -0.67608003089159 | 0.07104757664747  | 2.86892703262712  |
| C  | -0.34430395645510 | 0.42009964552687  | 1.40097641279198  |

|   |                   |                   |                   |
|---|-------------------|-------------------|-------------------|
| C | -1.87120072432699 | -0.62975307000624 | -0.53782106630005 |
| C | -3.19000738226873 | 0.16475064924163  | -0.27165045471569 |
| C | -3.99408826317490 | -0.32202080747862 | 0.93644373860574  |
| C | -5.34719453096257 | 0.37955927189707  | 1.06759635788605  |
| C | -6.18499596080186 | 0.22722613197001  | -0.20011344468919 |
| C | -5.41296600479357 | 0.73212809143989  | -1.41842308083568 |
| C | -4.05780403265750 | 0.03484170428007  | -1.53919287275535 |
| O | -2.90259822809685 | 1.54214406655204  | 0.03466027743381  |
| C | -2.46979142660162 | 2.38749671951058  | -1.02139860289907 |
| C | 1.10121453709283  | 0.95316098066953  | 1.26960384923066  |
| C | 1.27770524105394  | 2.24479094748760  | 0.58478001341045  |
| O | 2.40345594202239  | 2.86458952700042  | 1.01060670904517  |
| C | 2.68657338296313  | 4.14993599433546  | 0.41957693301098  |
| O | 0.55152278988756  | 2.72188926751684  | -0.26487659198116 |
| H | -0.64826569638497 | -2.80303915402029 | 1.57173076141450  |
| H | -2.32438041505044 | -2.34327190135566 | 1.32420635414700  |
| H | -0.78241488880757 | -1.93489642360685 | 3.68175772970035  |
| H | -2.35743245052104 | -1.22685894276202 | 3.36277498110696  |
| H | -2.17637824355717 | -1.59383247809427 | -0.94712727736342 |
| H | -1.36719621435021 | -0.09199929888682 | -1.33577881804168 |
| H | -3.41096404166157 | -0.16008443811889 | 1.84020144202981  |
| H | -4.15361532747217 | -1.39872561727699 | 0.83874724649510  |
| H | -5.88192103751790 | -0.02909584043648 | 1.92872611310230  |
| H | -5.17923984877304 | 1.43994500991866  | 1.26868679757244  |
| H | -6.43878823660465 | -0.82960485066355 | -0.34485660227726 |
| H | -7.13028604966879 | 0.76633696347386  | -0.10030107462311 |
| H | -5.26825898062482 | 1.81144649173367  | -1.32644206393051 |
| H | -5.98878200832390 | 0.56811376988346  | -2.33294295002979 |
| H | -3.50729191329715 | 0.40470032982372  | -2.40722395620740 |
| H | -4.22169633612377 | -1.03247257622572 | -1.71380901308023 |
| H | -2.14033364829130 | 3.31146366207841  | -0.55288931100928 |
| H | -3.28017650167618 | 2.60611980616496  | -1.72219454420823 |
| H | -1.61905486465424 | 1.97573601408216  | -1.56313353538765 |
| H | 4.67311466663970  | -0.54614239213532 | 0.08307657254914  |
| H | 4.97130175150486  | -1.95271528359927 | -0.94407976502915 |
| H | 4.13587043862530  | -2.13403735292285 | 0.60901747872635  |
| H | 0.16977408451982  | -3.02203203243249 | -3.50896848192865 |
| H | -1.00724413035379 | -1.85178491929535 | -2.92833807406100 |
| H | -0.59465457132741 | -3.25309020933813 | -1.94058778867512 |
| H | -0.51636245324606 | 0.27777221119027  | -3.28626900380321 |



|   |                   |                   |                   |
|---|-------------------|-------------------|-------------------|
| H | 1.01092390170894  | 0.72114836028277  | -4.03323706095976 |
| H | 0.44011173367465  | 1.59827227263148  | -2.61090505758165 |
| H | 3.85908194958382  | 1.37947876099001  | -0.80633405373191 |
| H | 2.57822750359260  | 2.03867340731265  | -1.82579232243477 |
| H | 3.91364277423822  | 1.14985567973694  | -2.55477317086769 |
| H | -1.33701361481593 | 0.85831686337208  | 3.23756392594815  |
| H | 0.22864247396218  | 0.09717362794779  | 3.46756863648080  |
| H | 2.47599593633131  | -3.82855932518070 | 0.20188253800245  |
| H | 2.77816763653146  | -4.26380546881317 | -1.48919910394567 |
| H | 1.13220578555923  | -4.25589114808716 | -0.84980838516283 |
| H | 1.66020140923691  | 0.88008274520408  | 2.19362465624516  |
| H | -1.00124924028266 | 1.17359615734228  | 0.97479765528022  |
| C | 4.00628225097961  | 4.62802626314966  | 0.97983636991023  |
| H | 2.71971304596232  | 4.04576728042633  | -0.66520221009984 |
| H | 1.86895850740801  | 4.83141124609769  | 0.66066313392707  |
| H | 4.25157590931093  | 5.60638041058759  | 0.56221682757193  |
| H | 3.95912594150974  | 4.71861070984367  | 2.06570746578961  |
| H | 4.81016294651713  | 3.93503437902983  | 0.72746676589053  |

### TS<sub>A'B</sub>

|    |                   |                   |                   |
|----|-------------------|-------------------|-------------------|
| C  | 1.09506569965775  | -0.38567930449885 | -2.08305567099831 |
| C  | 2.38397274933212  | -0.06645431919827 | -1.57177428607140 |
| C  | 2.88304324679532  | -1.22094717886497 | -0.87411328480336 |
| C  | 1.93707733166129  | -2.29912217053489 | -1.08747107633096 |
| C  | 0.86128160680851  | -1.79269562404057 | -1.81976122601684 |
| Ru | 1.17137698883118  | -0.48945105773799 | 0.22484786019874  |
| Cl | 1.88976198436888  | -1.67982367247632 | 2.21264425998781  |
| C  | 3.17271812954074  | 1.15815256295929  | -1.89723546067185 |
| C  | 4.24518795576408  | -1.38500774610257 | -0.28552409856356 |
| C  | 2.12433709436007  | -3.70006451762304 | -0.61221231030660 |
| C  | -0.26520245987789 | -2.61784888976143 | -2.35457247441845 |
| C  | 0.32080204786887  | 0.49144003336452  | -3.01596989607421 |
| C  | -1.19140278762150 | -0.78717728151595 | 0.70701961178635  |
| C  | -1.37328806632162 | -2.08272479849727 | 1.49309487342093  |
| C  | -1.24954500180285 | -1.67843861891217 | 2.98293225549397  |
| C  | -0.80012030616307 | -0.19527074259207 | 3.00079337996810  |
| C  | -0.83363333063553 | 0.23572040630553  | 1.56232525722222  |
| C  | -1.99898148621408 | -0.52512555161905 | -0.53988879029635 |
| C  | -3.37051075531669 | 0.16261288755419  | -0.31403134612327 |
| C  | -4.23678495996388 | -0.55736925482306 | 0.72389855534578  |

|   |                   |                   |                   |
|---|-------------------|-------------------|-------------------|
| C | -5.63216163250667 | 0.05715036875806  | 0.84931235492956  |
| C | -6.34942047243497 | 0.10805291111777  | -0.49975167225684 |
| C | -5.50058004044011 | 0.83211949883135  | -1.54589008899824 |
| C | -4.11605231851632 | 0.19618577491919  | -1.66098981588996 |
| O | -3.20831144852577 | 1.48543465026269  | 0.22484754637596  |
| C | -2.52964184433691 | 2.44755636432906  | -0.56647563460855 |
| C | 1.47338353000364  | 1.15556134162494  | 1.07827897832793  |
| C | 1.70741833733897  | 2.46831421918047  | 0.44039665696256  |
| O | 2.85419874696976  | 3.03501029694323  | 0.86792868856027  |
| C | 3.18312772729032  | 4.32493140722946  | 0.29830116283314  |
| O | 0.96195503530564  | 2.99528177773270  | -0.35952523669744 |
| H | -0.62267354573702 | -2.82393574918203 | 1.22155895357785  |
| H | -2.34941474295251 | -2.51564465395151 | 1.26954037401773  |
| H | -0.52902563869837 | -2.30600762096060 | 3.49930155731162  |
| H | -2.21358742619673 | -1.78553558446410 | 3.48302312928804  |
| H | -2.18995656089761 | -1.46272158396514 | -1.05554877042774 |
| H | -1.44245579589271 | 0.10464589431393  | -1.22435492918159 |
| H | -3.73012335763099 | -0.52997118583635 | 1.68917776786162  |
| H | -4.32340122688847 | -1.60771414771787 | 0.43037142205663  |
| H | -6.21950701381000 | -0.51838528184631 | 1.56924243310949  |
| H | -5.53756244737431 | 1.06883307453897  | 1.24943720630914  |
| H | -6.54894533633135 | -0.91365575837544 | -0.84442973367782 |
| H | -7.32045818263448 | 0.59830753347574  | -0.39435968971827 |
| H | -5.39612013382819 | 1.88267036053019  | -1.26174306043565 |
| H | -5.99677370216872 | 0.81363268510687  | -2.51959561983601 |
| H | -3.51207296915076 | 0.71105561671558  | -2.41174052095961 |
| H | -4.21934083101489 | -0.83620595489644 | -2.00866279060846 |
| H | -2.52655064213184 | 3.36699428132103  | 0.01719762612284  |
| H | -3.04185772060138 | 2.64123068395829  | -1.51344716722552 |
| H | -1.49135552846668 | 2.17518168422593  | -0.76976186235549 |
| H | 4.66240443062628  | -0.42450975850660 | 0.01358558155520  |
| H | 4.92531149708522  | -1.84054754469181 | -1.01276572332843 |
| H | 4.20856072501871  | -2.01699481820854 | 0.59976235287775  |
| H | 0.11232535703838  | -3.29393778918610 | -3.12675231556655 |
| H | -1.03861787053355 | -2.00492790000229 | -2.80964720331468 |
| H | -0.72719297062441 | -3.23410956792801 | -1.58276850190478 |
| H | -0.70220105288644 | 0.14495791573255  | -3.15039323394629 |
| H | 0.78779990542754  | 0.50488272875394  | -4.00638486745658 |
| H | 0.28436705541071  | 1.51716055032060  | -2.64986799335537 |
| H | 3.86594063425843  | 1.41687039014298  | -1.09838182243835 |

|   |                   |                   |                   |
|---|-------------------|-------------------|-------------------|
| H | 2.52806558786739  | 2.01411113582746  | -2.08488542591019 |
| H | 3.76219271365777  | 0.97875514000137  | -2.80170749246030 |
| H | -1.49872803522256 | 0.43736657289202  | 3.55650243149738  |
| H | 0.18129146724073  | -0.07702258724109 | 3.45854177909821  |
| H | 2.38866438124466  | -3.71291552553003 | 0.44611064412824  |
| H | 2.92768894827258  | -4.19134502416273 | -1.16973579867716 |
| H | 1.21777743115501  | -4.28998365402102 | -0.74293672163000 |
| H | 1.51289899557569  | 1.22936359012035  | 2.16892018960126  |
| H | -0.98206003432780 | 1.26880269754548  | 1.30066474789749  |
| C | 4.51110830637011  | 4.75208328266258  | 0.87789010758256  |
| H | 3.22153650616444  | 4.22853552484488  | -0.78754300594288 |
| H | 2.38306238907162  | 5.02508724739456  | 0.54238684870129  |
| H | 4.79193713225754  | 5.72651873332888  | 0.47375835611260  |
| H | 4.45426116202946  | 4.83267104451182  | 1.96414534469111  |
| H | 5.29481717301038  | 4.03626512429395  | 0.62650824307271  |

## B

|    |                   |                   |                   |
|----|-------------------|-------------------|-------------------|
| C  | 1.21656433781261  | -0.74882450324065 | -1.91002498058393 |
| C  | 2.44799656897430  | -0.25570542643461 | -1.39522660062148 |
| C  | 2.95615251898012  | -1.22979849215780 | -0.48451031932029 |
| C  | 2.10174685865252  | -2.40457245714786 | -0.55837361197128 |
| C  | 1.06703392528757  | -2.11282821816634 | -1.45054628194862 |
| Ru | 1.07921171013257  | -0.43572895716355 | 0.38365576963648  |
| Cl | 2.08002364442979  | -0.95417848620187 | 2.52367345847038  |
| C  | 3.20955785684245  | 0.92389291284651  | -1.90143641698264 |
| C  | 4.29835825961293  | -1.18998255667745 | 0.16552977916797  |
| C  | 2.35999429132614  | -3.67877200548208 | 0.17333578380268  |
| C  | 0.07408018374054  | -3.06760020922121 | -2.02002199850146 |
| C  | 0.43089593768511  | -0.10882886614353 | -3.00938406359250 |
| C  | -1.26978865068951 | -0.90489999464266 | 0.56149437000198  |
| C  | -1.55326397053166 | -2.38749977243766 | 0.79678427721867  |
| C  | -0.93619956848545 | -2.69451153294530 | 2.16822457549530  |
| C  | -0.97248160246760 | -1.34251714824403 | 2.89038518227924  |
| C  | -0.89353314135589 | -0.34630436905911 | 1.76738998512230  |
| C  | -1.97102891754483 | -0.16963943576446 | -0.55627154530389 |
| C  | -3.32107422471358 | 0.50275795250690  | -0.18814954409794 |
| C  | -4.31141170814665 | -0.46235412377310 | 0.47052118126996  |
| C  | -5.68644398985596 | 0.16775194236029  | 0.69921806166817  |
| C  | -6.27315715010502 | 0.72892513411488  | -0.59531912804298 |

|   |                   |                   |                   |
|---|-------------------|-------------------|-------------------|
| C | -5.30450623937485 | 1.71572552715415  | -1.24740441814470 |
| C | -3.93805153818408 | 1.07150176915168  | -1.47847494040626 |
| O | -3.12430093335246 | 1.52757284081612  | 0.80078786750404  |
| C | -2.42342652529162 | 2.69409908083461  | 0.40509746594726  |
| C | 1.02398546314031  | 1.39535901287281  | 0.73012145076165  |
| C | 1.35692631953953  | 2.52401178073687  | -0.16267732713491 |
| O | 2.41784277175988  | 3.22470847207723  | 0.28074035008186  |
| C | 2.79392960370959  | 4.38699835122793  | -0.49714054840696 |
| O | 0.73021280590895  | 2.82523088577172  | -1.15902011159440 |
| H | -1.19902316228862 | -3.04164776870439 | 0.00932612939274  |
| H | -2.64014234917202 | -2.50826084696146 | 0.83134688026744  |
| H | 0.10181530724329  | -3.00607104229042 | 2.05678364240377  |
| H | -1.47154395395085 | -3.47961666842310 | 2.70219685212553  |
| H | -2.16618850914715 | -0.86638720952601 | -1.37340595184686 |
| H | -1.32970923295568 | 0.60506595685060  | -0.96656109252935 |
| H | -3.89597178818677 | -0.79530941234248 | 1.42215640413111  |
| H | -4.41271016039773 | -1.34372623893273 | -0.17015515352109 |
| H | -6.36008035046752 | -0.57715098821383 | 1.13066176399378  |
| H | -5.58773466208874 | 0.97195256319342  | 1.43176069731729  |
| H | -6.47297429381250 | -0.09379443059333 | -1.29232279078775 |
| H | -7.23301876605336 | 1.21297902558203  | -0.39839021431473 |
| H | -5.19378218842929 | 2.58998162815983  | -0.60025020671517 |
| H | -5.70606738792853 | 2.07498237865258  | -2.19837257377840 |
| H | -3.24543512603927 | 1.77891642317982  | -1.93977221557303 |
| H | -4.04590443336370 | 0.24413955331335  | -2.18656216000602 |
| H | -2.18972720115962 | 3.23376137605275  | 1.32274700013294  |
| H | -3.03401232684274 | 3.34282063077860  | -0.23108280353856 |
| H | -1.49153771991444 | 2.47366045692791  | -0.11835912754083 |
| H | 4.59631503248824  | -0.16855714248984 | 0.39593164947359  |
| H | 5.04762397272515  | -1.62282242434296 | -0.50586582267644 |
| H | 4.30046774733778  | -1.74840000637059 | 1.09792606739302  |
| H | 0.39569379070197  | -3.34819369660540 | -3.02812775402271 |
| H | -0.91922709046861 | -2.63126881450181 | -2.11313431399675 |
| H | -0.00228653809441 | -3.98254539640910 | -1.43632181521475 |
| H | -0.57611697497967 | -0.51527527446992 | -3.07474376935685 |
| H | 0.91674614457391  | -0.28093140166238 | -3.97580491213815 |
| H | 0.35010828926260  | 0.96678060837046  | -2.85844013351338 |
| H | 3.78470120571272  | 1.40600596495110  | -1.11291619334003 |
| H | 2.55547551658033  | 1.66273236710181  | -2.35767797614136 |
| H | 3.91561174129978  | 0.58722781094063  | -2.66687328067615 |

|   |                   |                   |                   |
|---|-------------------|-------------------|-------------------|
| H | -1.94349470870471 | -1.18627920119544 | 3.38010483393280  |
| H | -0.19495069292693 | -1.22889865938189 | 3.64066794079841  |
| H | 2.55571309525972  | -3.47713847442229 | 1.22804417870870  |
| H | 3.23285873383439  | -4.19725000627581 | -0.23472041627755 |
| H | 1.51006360340052  | -4.35729596352983 | 0.11098706021376  |
| H | 0.76356018281420  | 1.77509498283676  | 1.72374956282256  |
| H | -0.99757286075739 | 0.70526222458863  | 1.97162012227887  |
| C | 4.01484960082884  | 4.99193766923588  | 0.15520219827132  |
| H | 2.99022586137295  | 4.07368719905829  | -1.52305430512895 |
| H | 1.95084517537985  | 5.07890292336207  | -0.51532790974516 |
| H | 4.32814038467777  | 5.87785102915828  | -0.40042576595709 |
| H | 3.80121389709645  | 5.28694753936516  | 1.18316028544422  |
| H | 4.84270329810415  | 4.28177164841661  | 0.16645166746156  |

**C (Secondary carbene)**

|    |                   |                   |                  |
|----|-------------------|-------------------|------------------|
| C  | 5.77167002398753  | 10.69262276932413 | 3.04092400527137 |
| C  | 6.41957118323680  | 10.02468214335501 | 4.12525746121247 |
| C  | 6.07189065000389  | 10.71799713828374 | 5.35149362260131 |
| C  | 5.32485660923967  | 11.85918826360026 | 5.01063896368416 |
| C  | 5.17331988182448  | 11.88202048690922 | 3.56044082835970 |
| Ru | 7.28527977949614  | 12.02636771663222 | 3.96770870612983 |
| C  | 8.06017882156162  | 12.30517276673496 | 2.28389264234206 |
| C  | 8.97578983692528  | 11.39694351276707 | 1.58206517143198 |
| O  | 8.96299498133316  | 10.18137697544800 | 1.61211122927596 |
| C  | 7.17827934036993  | 8.74715462810893  | 4.02999839845238 |
| C  | 6.52085357467356  | 10.31264731776751 | 6.71468088129291 |
| C  | 4.79531618104078  | 12.90030755526633 | 5.93729150284013 |
| C  | 4.36421859715961  | 12.87096898066930 | 2.79316384036042 |
| C  | 5.70433130753254  | 10.20722507967856 | 1.63203219343598 |
| Cl | 8.53093681460889  | 13.08359871875886 | 5.59982574117762 |
| O  | 9.89067228864162  | 12.10394255682467 | 0.87807904510987 |
| C  | 10.93790767138185 | 11.33402425384634 | 0.24420508144472 |
| H  | 7.73609201149965  | 13.14774270706114 | 1.66606634801844 |
| H  | 4.69521861109215  | 12.93342143919818 | 1.75747189385650 |
| H  | 4.43855498946760  | 13.86520048926395 | 3.23165687786895 |
| H  | 3.30743797008339  | 12.58488491325550 | 2.79056826852918 |
| H  | 7.76847826849688  | 8.71966632849887  | 3.11631246546633 |
| H  | 6.48742596065008  | 7.89747745622582  | 4.03123102124441 |
| H  | 7.85399734967768  | 8.62917394631136  | 4.87550528365609 |
| H  | 5.86776887103217  | 9.53304497400505  | 7.11767244330120 |

|   |                   |                   |                   |
|---|-------------------|-------------------|-------------------|
| H | 6.51174688286313  | 11.15629849980270 | 7.40141198665858  |
| H | 7.53740524524385  | 9.92193138516690  | 6.69247852017583  |
| H | 3.74853848422292  | 12.69892392725746 | 6.18425489524924  |
| H | 4.84789102196199  | 13.89037873286348 | 5.48562702784698  |
| H | 5.36583507007742  | 12.93159048436305 | 6.86312308252687  |
| H | 6.59551254377770  | 9.64363226601342  | 1.36744121698076  |
| H | 5.60252746272260  | 11.03217186590776 | 0.92806305121850  |
| H | 4.83271947391349  | 9.55658696861664  | 1.51167574699023  |
| C | 11.88813683340800 | 12.31110903171026 | -0.40814783200014 |
| H | 11.43213499993650 | 10.72601164069818 | 1.00318255696385  |
| H | 10.48311630998279 | 10.65784971264923 | -0.48123129304848 |
| H | 12.69530477479027 | 11.76601075474254 | -0.90141481587793 |
| H | 11.37338527463350 | 12.91482710082977 | -1.15690945438716 |
| H | 12.32675204744857 | 12.98038851158300 | 0.33289539433873  |

#### TS<sub>A'D</sub>

|    |                   |                   |                   |
|----|-------------------|-------------------|-------------------|
| C  | 1.45132083485588  | -0.68130853033433 | -1.83419281694214 |
| C  | 2.76632270078825  | -0.42623128154213 | -1.36632781299157 |
| C  | 3.23192359023361  | -1.62396870096812 | -0.70915562157742 |
| C  | 2.22560255158562  | -2.64743171601531 | -0.87369943398431 |
| C  | 1.15176957285708  | -2.07733612644404 | -1.55526040348389 |
| Ru | 1.66784910944868  | -0.77924456889155 | 0.48362886438003  |
| Cl | 2.52954173102549  | -1.80721380839613 | 2.48899687305936  |
| C  | 3.57093566449886  | 0.80209873293094  | -1.63322575121891 |
| C  | 4.60720284176125  | -1.84072724369430 | -0.16834874724820 |
| C  | 2.34088924641332  | -4.04664468137198 | -0.37069007118397 |
| C  | -0.06178362607358 | -2.83872109367876 | -1.98715743053188 |
| C  | 0.69813839367257  | 0.24311943927052  | -2.73735454793497 |
| C  | -0.37588798912284 | -0.77525452181763 | 0.84805946320377  |
| C  | -0.82486643834438 | -1.93008620248533 | 1.73495452038189  |
| C  | -1.16876071667669 | -1.26525195842493 | 3.08484901816718  |
| C  | -0.17365482231952 | -0.10227535512061 | 3.23020413002185  |
| C  | 0.10637199530325  | 0.38876910491931  | 1.80582995845929  |
| C  | -1.29063710981391 | -0.28159729337033 | -0.25142609364739 |
| C  | -2.77306065300481 | 0.13548772443709  | 0.02245464773585  |
| C  | -3.66444862994859 | -1.03784332321892 | 0.45234362634876  |
| C  | -5.15318841990267 | -0.68706876053926 | 0.47738215060301  |
| C  | -5.63491315664673 | -0.15262585366598 | -0.86812287133675 |
| C  | -4.79262616391735 | 1.04892456877730  | -1.29052065220524 |

|   |                   |                   |                   |
|---|-------------------|-------------------|-------------------|
| C | -3.30469966530408 | 0.70020592678393  | -1.31243601417343 |
| O | -2.88084479706308 | 1.08728714720994  | 1.09299372953039  |
| C | -2.53011072189144 | 2.43969787706599  | 0.82281346501893  |
| C | 1.53107474531451  | 0.96062875214059  | 1.54526412198297  |
| C | 1.60803877518759  | 2.17820939257343  | 0.73720582563275  |
| O | 2.77630942083451  | 2.83497417652698  | 0.94696016537435  |
| C | 2.97914290545608  | 4.03855084453481  | 0.18159103414726  |
| O | 0.78007976562583  | 2.57509065630701  | -0.06769208750674 |
| H | -0.00058415688707 | -2.62488268441837 | 1.88007408469625  |
| H | -1.65663401167164 | -2.48615959718643 | 1.30899056288750  |
| H | -1.10147159800678 | -1.97250958859173 | 3.91217316160708  |
| H | -2.18649333989431 | -0.87344436769138 | 3.05799536547099  |
| H | -1.36331952807203 | -1.05014984946949 | -1.01410856126253 |
| H | -0.80728560411655 | 0.57985022446073  | -0.70477965304038 |
| H | -3.36530136604949 | -1.37376115208222 | 1.44103593479412  |
| H | -3.49462386607763 | -1.86890268454670 | -0.23965026059904 |
| H | -5.72581540691437 | -1.57239782136392 | 0.76543795853072  |
| H | -5.32342382631289 | 0.06724214134601  | 1.24968982154232  |
| H | -5.55145489005331 | -0.94014716304597 | -1.62663085510875 |
| H | -6.69127997407876 | 0.12230646314651  | -0.81516866971643 |
| H | -4.97218751252078 | 1.87108772642347  | -0.59304384109328 |
| H | -5.09549745031673 | 1.40439216707672  | -2.27888533566032 |
| H | -2.70845396008081 | 1.56489306656002  | -1.60916978510034 |
| H | -3.13314494029216 | -0.06282396197573 | -2.07799473129480 |
| H | -2.44884207310596 | 2.92659747699664  | 1.79443143904953  |
| H | -3.30462507225835 | 2.95074507722219  | 0.24416100317739  |
| H | -1.57423560376400 | 2.53722919765412  | 0.30441239732092  |
| H | 5.01016503969871  | -0.93066186843348 | 0.27438510918961  |
| H | 5.27797188047223  | -2.14736700280529 | -0.97819112854077 |
| H | 4.61274566225725  | -2.60911032649829 | 0.60023381421882  |
| H | 0.24034422619677  | -3.71745368850976 | -2.56112091479339 |
| H | -0.71127472694626 | -2.24094493926204 | -2.62324148263130 |
| H | -0.64849858994071 | -3.19350580138777 | -1.13856349008130 |
| H | -0.32040755971506 | -0.09340477123770 | -2.91392177111427 |
| H | 1.19661100577769  | 0.30692414930362  | -3.70974833726632 |
| H | 0.64934242067767  | 1.24936733285363  | -2.32004873173305 |
| H | 4.23806697261361  | 1.03464249193133  | -0.80448734499109 |
| H | 2.92558065199164  | 1.66235680500780  | -1.79934133775348 |
| H | 4.18443089657369  | 0.66336701315545  | -2.52940555522012 |
| H | -0.58168689577421 | 0.71250478809082  | 3.83016041864586  |

|   |                   |                   |                   |
|---|-------------------|-------------------|-------------------|
| H | 0.74544357458079  | -0.44448682838906 | 3.69747845697104  |
| H | 2.67093785242404  | -4.05132814941212 | 0.66941673892031  |
| H | 3.06770928209724  | -4.61578478753360 | -0.95807927286804 |
| H | 1.38545844193772  | -4.56730767536579 | -0.42231581401454 |
| H | 2.14924319413629  | 0.97808590875184  | 2.43518085089667  |
| H | -0.56188275227885 | 1.19379784890083  | 1.52098400352218  |
| C | 4.36519386952224  | 4.55123926376555  | 0.49966455265349  |
| H | 2.86301145886220  | 3.81364541727377  | -0.87928872402015 |
| H | 2.20592543804242  | 4.76065445432107  | 0.45014327611544  |
| H | 4.55529164339147  | 5.47276593536076  | -0.05399067922911 |
| H | 4.46765676619023  | 4.76154569413704  | 1.56502364109921  |
| H | 5.12426549285212  | 3.81908074196879  | 0.22018344774250  |

## D

|    |                   |                   |                   |
|----|-------------------|-------------------|-------------------|
| C  | 1.21885935681373  | -0.51446674570469 | -2.00323988450736 |
| C  | 2.52199027066042  | -0.28300005318826 | -1.45331704650011 |
| C  | 2.99907313584517  | -1.50783925254677 | -0.91131295408423 |
| C  | 1.98564054841773  | -2.50029620751770 | -1.06759263986685 |
| C  | 0.88500122630496  | -1.88921700149369 | -1.76009664037534 |
| Ru | 1.09813387099564  | -0.88946174093502 | 0.20772343612673  |
| Cl | 2.33660950886215  | -1.53017896806194 | 2.19638228652901  |
| C  | 3.33682011338493  | 0.95092221204787  | -1.63792738272097 |
| C  | 4.35481274897800  | -1.72064256851384 | -0.33495846288067 |
| C  | 2.10706874606788  | -3.93555999477691 | -0.67225613012149 |
| C  | -0.29349874033216 | -2.63883780257347 | -2.29437482568982 |
| C  | 0.50223473325906  | 0.45775536681756  | -2.88008940938728 |
| C  | -0.92551382365753 | -0.17446201917296 | 0.51813037859392  |
| C  | -0.91664384185271 | -1.46183578806181 | 1.23844929757550  |
| C  | -1.01099947973032 | -1.20429077758607 | 2.74973237265685  |
| C  | -0.97873001831534 | 0.33478689604980  | 2.89971707654987  |
| C  | -0.59143153213995 | 0.91111522606008  | 1.52922617306768  |
| C  | -1.85252962360048 | 0.10288787035429  | -0.62755008097586 |
| C  | -3.32248658698572 | 0.45716634517103  | -0.28046115211314 |
| C  | -3.98864506515015 | -0.61321758138399 | 0.59008217951288  |
| C  | -5.47983027268265 | -0.35221030660907 | 0.81010353370066  |
| C  | -6.22958599599626 | -0.20116479103302 | -0.51307635055031 |
| C  | -5.58658434481745 | 0.87879891636030  | -1.38378795167120 |
| C  | -4.10224148652987 | 0.59055048235320  | -1.60244263796705 |
| O  | -3.41545250082530 | 1.65678123725169  | 0.50519237458217  |
| C  | -3.01886632317232 | 2.87544421309986  | -0.10424949464570 |



|   |                   |                   |                   |
|---|-------------------|-------------------|-------------------|
| C | 0.90836386220584  | 1.02575149374519  | 1.28418678620234  |
| C | 1.25957981918252  | 2.18114785874065  | 0.46053169608963  |
| O | 2.46572206722687  | 2.70960989519503  | 0.80606536871660  |
| C | 2.83892622347672  | 3.93480697537865  | 0.15036117050500  |
| O | 0.57624847833131  | 2.68172901478872  | -0.42075626015166 |
| H | 0.09898601607526  | -2.07140525678950 | 1.06640379167011  |
| H | -1.59522707939287 | -2.20802855713007 | 0.82821776697668  |
| H | -0.18672495577432 | -1.67969151652311 | 3.27643823972910  |
| H | -1.94070111007308 | -1.62540653655724 | 3.13513883245565  |
| H | -1.89314970224064 | -0.76100295289370 | -1.28828566928655 |
| H | -1.44611129912592 | 0.92892847158882  | -1.20685686793225 |
| H | -3.47821419390822 | -0.65680614311811 | 1.55156802298830  |
| H | -3.85324422354390 | -1.58482267240252 | 0.10386918189628  |
| H | -5.90905747168935 | -1.16675497774906 | 1.39933110157772  |
| H | -5.59287987338375 | 0.56148365535820  | 1.39767184057898  |
| H | -6.21228440578604 | -1.15562620371360 | -1.05296629844313 |
| H | -7.28046790795023 | 0.03530895981950  | -0.32840795146765 |
| H | -5.70234104375173 | 1.85043260333027  | -0.89630038082621 |
| H | -6.09524610887796 | 0.94482247557183  | -2.34900713678690 |
| H | -3.64310617868275 | 1.35811458509574  | -2.22940484295623 |
| H | -3.99536987489606 | -0.35232860807543 | -2.14773420049055 |
| H | -3.09233412953525 | 3.63500018482577  | 0.67329194782126  |
| H | -3.68334311480479 | 3.15855476078607  | -0.92646967229771 |
| H | -1.98722051327003 | 2.85016855492742  | -0.46393370734661 |
| H | 4.71653106038589  | -0.82489136368433 | 0.16587866247367  |
| H | 5.05415142814532  | -1.96908199874304 | -1.14049106133907 |
| H | 4.35776303373243  | -2.52942441523153 | 0.39086696424839  |
| H | 0.02917798367138  | -3.33386490427291 | -3.07447579601679 |
| H | -1.02998822845875 | -1.97165209996706 | -2.73529893691339 |
| H | -0.79008318453224 | -3.22671831396231 | -1.52145813399843 |
| H | -0.49685860263034 | 0.11473485586885  | -3.13601619120794 |
| H | 1.05755964006153  | 0.58315541469735  | -3.81451108738668 |
| H | 0.41999654787163  | 1.43328790860171  | -2.40156218640441 |
| H | 3.92540136459708  | 1.18035922057832  | -0.75221201601976 |
| H | 2.70504504125601  | 1.80688209428914  | -1.85897862802627 |
| H | 4.02510275879558  | 0.81517253987081  | -2.47813840032407 |
| H | -1.97037168321792 | 0.70457930815796  | 3.16502230583222  |
| H | -0.28757462865946 | 0.65370732927157  | 3.68001819456387  |
| H | 2.56333552438440  | -4.02495629432295 | 0.31362882635678  |
| H | 2.72510748219788  | -4.48940755308796 | -1.38539401519326 |

|   |                   |                   |                   |
|---|-------------------|-------------------|-------------------|
| H | 1.13104011456408  | -4.41847150850308 | -0.63430858342685 |
| H | 1.54134653152640  | 0.94556605598014  | 2.15866787137240  |
| H | -1.10740893991293 | 1.84610702225122  | 1.34136572063608  |
| C | 4.22843388176802  | 4.29860146193638  | 0.62320606031868  |
| H | 2.80230547749584  | 3.79907661808831  | -0.93085760633898 |
| H | 2.10862571857788  | 4.70522334434070  | 0.40581681283685  |
| H | 4.54366979398144  | 5.23702996190998  | 0.16271664943388  |
| H | 4.25111237829254  | 4.42061199741386  | 1.70684414003262  |
| H | 4.94750760249326  | 3.52412008791291  | 0.35164861043039  |

### TS<sub>DE</sub>

|    |                   |                   |                   |
|----|-------------------|-------------------|-------------------|
| C  | 1.19055904469985  | -0.55207774787442 | -2.08817000356112 |
| C  | 2.50896648027200  | -0.32865476355029 | -1.54723494743286 |
| C  | 2.99560784440506  | -1.57044385405148 | -1.03072614273170 |
| C  | 1.96403512135872  | -2.54611427737957 | -1.16300051302447 |
| C  | 0.84653925987603  | -1.91193823263314 | -1.83014384084796 |
| Ru | 1.22361734188276  | -0.94993842750895 | 0.08141918171752  |
| Cl | 2.47582012704588  | -1.36138044511591 | 2.16960296686990  |
| C  | 3.31023066884291  | 0.91995586833324  | -1.69586491843753 |
| C  | 4.35979922235073  | -1.79690760711962 | -0.47675359091042 |
| C  | 2.06199792369648  | -3.98583181680025 | -0.77961596214547 |
| C  | -0.37741203604060 | -2.63502999227161 | -2.29029192919925 |
| C  | 0.45084415544841  | 0.43266200718686  | -2.93258039900670 |
| C  | -0.86430816759939 | 0.00765074647271  | 0.78696796736441  |
| C  | -0.82262529167381 | -1.36973281335056 | 1.40901659918871  |
| C  | -0.80395102782294 | -1.18868450118626 | 2.93998009929606  |
| C  | -0.99734475037513 | 0.32462204145459  | 3.20779114080221  |
| C  | -0.81695959397765 | 1.01818593661459  | 1.86670515561159  |
| C  | -1.67951667085247 | 0.27913633594970  | -0.45028247345405 |
| C  | -3.19164275877547 | 0.56638822286580  | -0.23985524218122 |
| C  | -3.87776421168976 | -0.47890098768643 | 0.64669390761148  |
| C  | -5.39223198767800 | -0.28137095773609 | 0.72772245342016  |
| C  | -6.03243625165229 | -0.26786471346017 | -0.65999318976196 |
| C  | -5.37116568782290 | 0.78008365948460  | -1.55582572515783 |
| C  | -3.86018636217916 | 0.56339419070764  | -1.62830529743890 |
| O  | -3.42015647781611 | 1.80733174067868  | 0.44851935644784  |
| C  | -3.08499814353021 | 3.01130031574107  | -0.22581451661482 |
| C  | 0.58144235750732  | 1.04536700939637  | 1.29766303688752  |
| C  | 0.95628018074059  | 2.21031605991210  | 0.48780309112900  |
| O  | 2.19463195587349  | 2.63790891569115  | 0.81329562446486  |

|   |                   |                   |                   |
|---|-------------------|-------------------|-------------------|
| C | 2.63529846085301  | 3.86044810267161  | 0.18495935345722  |
| O | 0.26632724234762  | 2.77634270971968  | -0.33939538215641 |
| H | 0.04535858018856  | -2.04446728842686 | 1.11380343763315  |
| H | -1.66933954493841 | -1.94222929609791 | 1.03616160611827  |
| H | 0.15023192547092  | -1.53027457419724 | 3.33217360677948  |
| H | -1.59201858678147 | -1.78142115571902 | 3.40468684671421  |
| H | -1.60624543895904 | -0.57911815621483 | -1.11066586665842 |
| H | -1.25063932564475 | 1.12394591396202  | -0.97965491603401 |
| H | -3.44600168489021 | -0.43684149102546 | 1.64731451906078  |
| H | -3.66279804321177 | -1.47136121048206 | 0.23866043161181  |
| H | -5.82992344575642 | -1.07382944541601 | 1.34022861703500  |
| H | -5.59763772923196 | 0.66470389681484  | 1.23289296462693  |
| H | -5.92281638650438 | -1.25666010640266 | -1.12136073927720 |
| H | -7.10544019584244 | -0.07666342543267 | -0.58061629921612 |
| H | -5.58049193195299 | 1.77637186468874  | -1.15791211705485 |
| H | -5.79561440308758 | 0.74504925610286  | -2.56238958190339 |
| H | -3.38778103459069 | 1.31022445314402  | -2.27024433284897 |
| H | -3.65896595847594 | -0.40760775330682 | -2.09085633338199 |
| H | -3.25497136491945 | 3.81159767869005  | 0.49390862506545  |
| H | -3.72837266463372 | 3.18759385196096  | -1.09314700038701 |
| H | -2.03880884814714 | 3.03885925196034  | -0.53472303850925 |
| H | 4.73199338756765  | -0.90926606284605 | 0.03070800396091  |
| H | 5.04802418062974  | -2.04357150093819 | -1.29205794121166 |
| H | 4.36813264410259  | -2.60994147741954 | 0.24458764414376  |
| H | -0.13677200889799 | -3.28553948796589 | -3.13648956227446 |
| H | -1.15643765389355 | -1.94906380790801 | -2.61782611282524 |
| H | -0.79239173834760 | -3.26608915175084 | -1.50322163174109 |
| H | -0.57456651388791 | 0.12175831556687  | -3.11927944568884 |
| H | 0.94692202271709  | 0.52965057799285  | -3.90341208296714 |
| H | 0.42410013481141  | 1.42017098964472  | -2.47285907846091 |
| H | 3.90694634428853  | 1.11648232585991  | -0.80699822155288 |
| H | 2.66562586197411  | 1.77889338787305  | -1.86832185250733 |
| H | 3.98991951512064  | 0.83768543163779  | -2.55035019862909 |
| H | -2.00510012579398 | 0.53312879355701  | 3.57188085723086  |
| H | -0.29560705348714 | 0.69210539215415  | 3.95785545324892  |
| H | 2.64472955835153  | -4.10523796406750 | 0.13277910528537  |
| H | 2.54200838782458  | -4.57134294735550 | -1.57047626819464 |
| H | 1.07604785175223  | -4.41558614480137 | -0.60257446304010 |
| H | 1.34772758768830  | 0.70468957685186  | 1.97858164974994  |
| H | -1.39309424710312 | 1.91711592546686  | 1.70521543220808  |

|   |                  |                  |                   |
|---|------------------|------------------|-------------------|
| C | 4.05166971730321 | 4.11940156128092 | 0.64336291133356  |
| H | 2.56977010414345 | 3.75247700370433 | -0.89755078989353 |
| H | 1.95740441246988 | 4.66425845086213 | 0.47738906139135  |
| H | 4.41786024525788 | 5.04822172869919 | 0.20187660753573  |
| H | 4.09887327801396 | 4.21025412822181 | 1.72908079835760  |
| H | 4.71412722158842 | 3.30850796592149 | 0.33848883496114  |

## E

|    |                   |                   |                   |
|----|-------------------|-------------------|-------------------|
| C  | 1.66404990104574  | -0.62947624628913 | -2.04256099688553 |
| C  | 3.04792651518100  | -0.67958979826717 | -1.63302902376267 |
| C  | 3.34147441734528  | -2.02249351416474 | -1.20631764916233 |
| C  | 2.12216705474438  | -2.78763896841797 | -1.32822175475457 |
| C  | 1.10207170008272  | -1.92904285218293 | -1.86953897566121 |
| Ru | 1.86947376400431  | -1.19638129452458 | 0.02971204021908  |
| Cl | 2.87426070196252  | -1.01190801285167 | 2.12711942074766  |
| C  | 4.01227106835022  | 0.45469637268903  | -1.70110537561419 |
| C  | 4.66586861819726  | -2.53866789018335 | -0.75782518860263 |
| C  | 1.96881186220987  | -4.24097730854971 | -1.03075034332591 |
| C  | -0.28149103793673 | -2.36487615685320 | -2.22365228363468 |
| C  | 0.98694969111842  | 0.57746464601453  | -2.60140978328357 |
| C  | -1.07327811963854 | 0.46487928070796  | 1.07216503778782  |
| C  | -0.84671077525892 | -0.95814289951445 | 1.57684250875040  |
| C  | -0.59440785962890 | -0.85473532138731 | 3.09135396021247  |
| C  | -1.20809862504269 | 0.49663811886745  | 3.52016116477095  |
| C  | -1.19726841948077 | 1.34553539407125  | 2.26720996220542  |
| C  | -1.83281949435172 | 0.66665161787211  | -0.21855910198519 |
| C  | -3.37778334313410 | 0.69492659763292  | -0.14602127669560 |
| C  | -3.96768514607157 | -0.53605957972113 | 0.55264544221996  |
| C  | -5.49557750041224 | -0.57803260977894 | 0.48929854404413  |
| C  | -6.00313662724409 | -0.49773445413568 | -0.94969373823293 |
| C  | -5.44519515980544 | 0.73954550185572  | -1.65305230144191 |
| C  | -3.91898467911471 | 0.76479880340227  | -1.58662753669725 |
| O  | -3.85047118260188 | 1.79482238000336  | 0.65108109164151  |
| C  | -3.66416373902636 | 3.10874077364437  | 0.14719868766349  |
| C  | 0.10527036411371  | 1.37501891342740  | 1.48494302802259  |
| C  | 0.45677145224664  | 2.56934991693528  | 0.70207130417044  |
| O  | 1.79957345800006  | 2.70944798783700  | 0.62997032049073  |
| C  | 2.28650921280404  | 3.87081687535847  | -0.07500356225109 |
| O  | -0.31154918940946 | 3.34771178400283  | 0.17688415768896  |
| H  | -0.01725587456059 | -1.47216873614518 | 1.04384067620385  |

|   |                   |                   |                   |
|---|-------------------|-------------------|-------------------|
| H | -1.71706854975983 | -1.57181729226888 | 1.35357644684553  |
| H | 0.47552116576049  | -0.86983182194456 | 3.29255692120311  |
| H | -1.03328245330054 | -1.69354985318278 | 3.63104798979215  |
| H | -1.55759628301100 | -0.14223534146056 | -0.89598263200469 |
| H | -1.51129083700912 | 1.58891811366456  | -0.69797659238663 |
| H | -3.64328695131591 | -0.53692067315073 | 1.59373878456373  |
| H | -3.55802568124291 | -1.43341041711979 | 0.07839713825000  |
| H | -5.85393047665850 | -1.49303409201750 | 0.96826770747307  |
| H | -5.89498083323742 | 0.26124258165447  | 1.06267390116633  |
| H | -5.69061580673967 | -1.39514061855148 | -1.49731491808595 |
| H | -7.09586717083477 | -0.48461014017557 | -0.96699698472366 |
| H | -5.84777903603417 | 1.63614831380575  | -1.17442698745568 |
| H | -5.76845375556874 | 0.76509023890426  | -2.69694805842583 |
| H | -3.52146827162146 | 1.64918796434635  | -2.08959656081137 |
| H | -3.52236850317223 | -0.09866517359639 | -2.13012785759180 |
| H | -4.00150396906980 | 3.78011903547108  | 0.93663543618947  |
| H | -4.27198729671095 | 3.29611123959628  | -0.74385268396373 |
| H | -2.61829475602644 | 3.32812219580660  | -0.07109977276987 |
| H | 5.24880633415126  | -1.75675833208461 | -0.27432059421357 |
| H | 5.23910422192306  | -2.91793932434556 | -1.60986909363986 |
| H | 4.54853005066087  | -3.34866655483521 | -0.03961119473151 |
| H | -0.27941818646676 | -2.91677067201821 | -3.16874820933329 |
| H | -0.95242871059267 | -1.51647238574429 | -2.34138616447958 |
| H | -0.70285006228474 | -3.02044275403585 | -1.46095570324146 |
| H | -0.09562503935809 | 0.49482492870977  | -2.54653049142386 |
| H | 1.26022117038279  | 0.71921672915344  | -3.65180166322338 |
| H | 1.27457746143140  | 1.47866627020207  | -2.06052639309598 |
| H | 4.78969063656994  | 0.35711691681085  | -0.94516224959072 |
| H | 3.50628757776728  | 1.40490977080954  | -1.53995036485921 |
| H | 4.49455217117819  | 0.49192565410167  | -2.68354904627917 |
| H | -2.24614766284909 | 0.37152700049352  | 3.83967951025172  |
| H | -0.66144899929003 | 0.94961847439495  | 4.34952056806273  |
| H | 2.64074744064166  | -4.55379004993042 | -0.23282882803959 |
| H | 2.19677985143339  | -4.84168492725665 | -1.91769636285325 |
| H | 0.95031019887583  | -4.47635635489591 | -0.72290338814281 |
| H | 0.96331278799783  | 0.88484755720370  | 1.92318041365682  |
| H | -1.80912135608224 | 2.23263468110675  | 2.20987590609363  |
| C | 3.76048912195622  | 4.00586128885109  | 0.23229279270372  |
| H | 2.10215605785710  | 3.73299588900829  | -1.14326327407842 |
| H | 1.71856853709720  | 4.74375159506971  | 0.24590075217762  |

|   |                  |                  |                   |
|---|------------------|------------------|-------------------|
| H | 4.17079213935393 | 4.86540520928600 | -0.30124785907105 |
| H | 3.91887874716528 | 4.15417109375128 | 1.30098844832848  |
| H | 4.31007496734592 | 3.11513571505812 | -0.07229724309032 |

**F (cyclopropanation product)**

|   |                   |                   |                  |
|---|-------------------|-------------------|------------------|
| C | 7.47734880767229  | 15.43263100525389 | 5.86775297549103 |
| C | 7.82834412193821  | 15.33709406393736 | 7.37138678962693 |
| C | 8.66142602840531  | 14.04655245780933 | 7.55642110444824 |
| C | 9.01482965883821  | 13.52046798771298 | 6.16869598937613 |
| C | 8.31911662791226  | 14.38807782840044 | 5.16185081155769 |
| C | 9.83230798550785  | 14.42104685938628 | 5.23326905248310 |
| C | 9.15825746360893  | 12.02922548800891 | 5.96445999611836 |
| C | 10.29276893091302 | 11.32226088820747 | 6.73314055187808 |
| C | 11.64151329857520 | 12.01964120476568 | 6.52525969633003 |
| C | 12.80270968241781 | 11.26546478412768 | 7.17358012343862 |
| C | 12.87408636028830 | 9.81583359699195  | 6.69483684628141 |
| C | 11.54138435775655 | 9.10154110110208  | 6.92282705723119 |
| C | 10.39262006498995 | 9.86177657568559  | 6.26056009568526 |
| O | 10.07688425080605 | 11.40188115480025 | 8.15948440149007 |
| C | 9.01158918698284  | 10.65598859353205 | 8.70846210962390 |
| H | 9.54306360262763  | 14.21095833962106 | 8.17551819294010 |
| H | 8.07497831978844  | 13.27676978509732 | 8.05900568282331 |
| H | 8.40366461307386  | 16.20507678916735 | 7.67436430044070 |
| H | 6.92488706652685  | 15.30590850832940 | 7.98219544327159 |
| H | 9.30990160778606  | 11.83246905292344 | 4.90018349151674 |
| H | 8.20869554673415  | 11.54878161423647 | 6.22172425959694 |
| H | 11.58300764294477 | 13.02973882332425 | 6.92737180414780 |
| H | 11.81923533988848 | 12.11724726856000 | 5.45067246020538 |
| H | 13.73924715744517 | 11.78453803749153 | 6.95334425934812 |
| H | 12.67504345417825 | 11.28360591443330 | 8.25836638347088 |
| H | 13.11377126383404 | 9.79671691811940  | 5.62497637722375 |
| H | 13.68089500325384 | 9.28513123917022  | 7.20667998033142 |
| H | 11.35784073432915 | 9.02007341052212  | 7.99768985528026 |
| H | 11.58152313973617 | 8.08212397860504  | 6.53049231780680 |
| H | 9.44113721456315  | 9.34892216049074  | 6.42182165152334 |
| H | 10.54906963557029 | 9.87606774339887  | 5.17777993675730 |
| H | 8.05422997334767  | 10.85743440468434 | 8.21688292786814 |
| H | 8.93101018342528  | 10.96142266307889 | 9.75121088370523 |

|   |                   |                   |                  |
|---|-------------------|-------------------|------------------|
| H | 9.19732745114493  | 9.57745714086656  | 8.67520704123487 |
| H | 6.42630148054082  | 15.18958792937983 | 5.69376829166738 |
| H | 7.64517945572698  | 16.43812835458937 | 5.48038614302908 |
| C | 10.67031465478443 | 15.54482922146261 | 5.70022705049623 |
| H | 7.92517038265733  | 13.95348150887596 | 4.25065781178234 |
| H | 10.32364031100144 | 13.86576846033842 | 4.44686260339943 |
| O | 11.93941602089114 | 15.37417850021746 | 5.24646103052690 |
| O | 10.34078760829924 | 16.48188671345669 | 6.38862740370858 |
| C | 12.91859726419178 | 16.33729179695321 | 5.69565285262498 |
| H | 13.69067676259945 | 16.31539024096080 | 4.92771619964485 |
| H | 12.45965004605641 | 17.32453604848780 | 5.72069843520511 |
| C | 13.47537201368869 | 15.95392014359807 | 7.05287107650332 |
| H | 14.26563999926946 | 16.65111746146384 | 7.33982944502884 |
| H | 12.69498428260878 | 15.99005934951791 | 7.81262967797538 |
| H | 13.89671894087153 | 14.94776988885401 | 7.02729712785396 |

## REFERENCES

- <sup>1</sup> Fagan, P. J.; Mahoney, W. S.; Calabrese, J. S.; Williams, J. C. Structure and Chemistry of the Complex Tetrakis( $\eta^5$ -pentamethylcyclopentadienyl)tetrakis( $\mu^3$ -chloro)tetraruthenium(II): A Useful Precursor to (Pentamethylcyclopentadienyl)ruthenium(0), -(II), and -(IV) Complexes. *Organometallics* **1990**, *9*, 1843 – 1852.
- <sup>2</sup> Biberger, T.; Gordon, C.; Leutzsch, M.; Peil, S.; Guthertz, A.; Copéret, C.; Fürstner, A. Alkyne *gem*-Hydrogenation: Formation of Pianostool Ruthenium Carbene Complexes and Analysis of Their Chemical Character. *Angew. Chem. Int. Ed.* **2019**, *58*, 8845-8850.
- <sup>3</sup> Wagner, C. E.; Shea, K. J. Synthesis and First Molecular Structure of a Bis-2-spiro-1-boraadamantane Derivative. *Org. Lett.* **2004**, *6*, 313 – 316.
- <sup>4</sup> Gibson, S. E.; Kaufmann, J. A. C.; Haycock, P. R.; White, A. J. P.; Hardick, D. J.; Tozer, M. J. Pendant Alkenes Promote Cobalt–Cobalt Bond Cleavage in (Alkyne)(binap)tetracarbonyldicobalt(0) Complexes. *Organometallics* **2007**, *26*, 1578 – 1580.
- <sup>5</sup> Shimamoto, T.; Chimori, M.; Sogawa, H.; Yamamoto, K. Cationic Palladium-Catalyzed Hydrosilylative Cross-Coupling of Alkynes with Alkenes. *J. Am. Chem. Soc.* **2005**, *127*, 16410 – 16411.
- <sup>6</sup> Li, J. ; Peng, J. ; Deng, Y. ; Ma, C. ; Zhang, G. ; Bai, Y. ; Lai, G. Synthesis of Platinum Acetylide Complexes and their Application in Curing Silicone Rubber by Hydrosilylation. *Appl. Organomet. Chem.* **2012**, *26*, 461 – 466.
- <sup>7</sup> Trost, B. M.; Fandrick, D. R.; Dinh, D. C. Dynamic Kinetic Asymmetric Allylic Alkylations of Allenes. *J. Am. Chem. Soc.* **2005**, *127*, 14186 – 14187.
- <sup>8</sup> Robertson, D. N. Adducts of *tert*-Alcohols Containing an Ethynyl Group with Dihydropyran. Potentially Useful Intermediates. *J. Org. Chem.* **1960**, *25*, 931 – 932.
- <sup>9</sup> Kelkar, S. V.; Arbale, A. A.; Joshi, G. S.; Kulkarni, G. H. Claisen Orthoester Rearrangement Reaction with Secondary & Tertiary Allylic Alcohols: Synthesis of 1,2-Seco-Crysanthemates and Their Structural Analogues. *Synth. Commun.* **1990**, *20*, 839-847.
- <sup>10</sup> Sylvester, K. T.; Chirik, P. J. Iron-Catalyzed, Hydrogen-Mediated Reductive Cyclization of 1,6-Enynes and Diynes: Evidence for Bis(imino)pyridine Ligand Participation. *J. Am. Chem. Soc.* **2009**, *131*, 8772 – 8774.
- <sup>11</sup> Achard, T.; Lepronier, A.; Gimbert, Y.; Clavier, H.; Giordano, L.; Tenaglia, A.; Buono, G. A Regio- and Diastereoselective Platinum-Catalyzed Tandem [2+1]/[3+2] Cycloaddition Sequence. *Angew. Chem. Int. Ed.* **2011**, *50*, 3552-3556.
- <sup>12</sup> Zhu, S.; Pathigooll, A.; Lowe, G.; Walsh, D. A.; Cooper, M.; Lewis, W.; Lam, H. W. Sulfonylative and Azidosulfonylative Cyclizations by Visible-Light-Photosensitization of Sulfonyl Azides in THF. *Chem. Eur. J.* **2017**, *23*, 17598 – 17604.
- <sup>13</sup> Kitamura, T.; Sato, Y.; Mori, M. Effects of Substituents on the Multiple Bonds on Ring-Closing Metathesis of Enynes. *Adv. Synth. Catal.* **2002**, *344*, 678 – 693.
- <sup>14</sup> Saito, T.; Nishimoto, Y.; Yasuda, M.; Baba, A. Direct Coupling Reaction between Alcohols and Silyl Compounds: Enhancement of Lewis Acidity of Me<sub>3</sub>SiBr Using InCl<sub>3</sub>. *J. Org. Chem.* **2006**, *71*, 8516-8522.
- <sup>15</sup> Natsch, A.; Derrer, S.; Flachsmann, F.; Schmid, J. A Broad Diversity of Volatile Carboxylic Acids, Released by a Bacterial Aminoacylase from Axilla Secretions, as Candidate Molecules for the Determination of Human-Body Odor Type. *Chem. Biodiversity* **2006**, *6*, 1-20.
- <sup>16</sup> Boyer, F.-D.; Hanna, I. Synthesis of the Tricyclic Core of Colchicine via a Dienyne Tandem Ring-Closing Metathesis Reaction. *Org. Lett.* **2007**, *9*, 2293-2295.
- <sup>17</sup> Wang, W.; Yang, J.; Wang, F.; Shi, M. Axially Chiral N-Heterocyclic Carbene Gold(I) Complex Catalyzed Asymmetric Cycloisomerization of 1,6-Enynes. *Organometallics* **2011**, *30*, 3859 – 3869.



- <sup>18</sup> Wei, X.; Lorenz, J. C.; Kapadia, S.; Saha, A.; Haddad, N.; Busacca, C. A.; Senanayake, C. H. Tandem Pd(II)-Catalyzed Vinyl Ether Exchange–Claisen Rearrangement as a Facile Approach to  $\gamma,\delta$ -Unsaturated Aldehydes. *J. Org. Chem.* **2007**, *72*, 4250 – 4253.
- <sup>19</sup> Hodgson, D. M.; Fleming, M. J.; Stanway, S. J. The Reactivity of Epoxides with Lithium 2,2,6,6-Tetramethylpiperidide in Combination with Organolithiums or Grignard Reagents. *J. Org. Chem.* **2007**, *72*, 4763 – 4773.
- <sup>20</sup> Grünanger, C. U.; Breit, B. Remote Control of Regio- and Diastereoselectivity in the Hydroformylation of Bishomoallylic Alcohols with Catalytic Amounts of a Reversibly Bound Directing Group. *Angew. Chem. Int. Ed.* **2010**, *49*, 967 – 970.
- <sup>21</sup> Davey, M. S.; Malde, R.; Mykura, R. C.; Baker, A. T.; Taher, T. E.; Le Duff, C. S.; Willcox, B. E.; Mehellou, Y. Synthesis and Biological Evaluation of (*E*)-4-Hydroxy-3-methylbut-2-enyl Phosphate (HMBP) Aryloxy Triester Phosphoramidate Prodrugs as Activators of V $\gamma$ 9/V $\delta$ 2 T-Cell Immune Responses. *J. Med. Chem.* **2018**, *61*, 2111 – 2117.
- <sup>22</sup> Clark, S.; Romiti, F.; Hogg, K. F.; Haniti, M.; Hamid, S. A.; Richter, S. C.; Boyer, A.; Redman, J. C.; Farrugia, L. J. Synthesis of Cyclopropyl-Substituted Furans by Brønsted Acid Promoted Cascade Reactions. *Angew. Chem. Int. Ed.* **2015**, *54*, 5744 – 5747.
- <sup>23</sup> Ferrer, S.; Echavarren, A. M. Role of  $\sigma,\pi$ -Digold(I) Alkyne Complexes in Reactions of Enynes. *Organometallics* **2018**, *37*, 781 – 786.
- <sup>24</sup> Kao, C.-L.; Kittlemann, W.; Zhang, H.; Seto, H.; Liu, H.-W. Stereochemical Analysis of Isopentenyl Diphosphate Isomerase Type II from *Staphylococcus aureus* Using Chemically Synthesized (*S*)- and (*R*)-[2-<sup>2</sup>H]Isopentenyl Diphosphates. *Org. Lett.* **2005**, *7*, 5677 – 5680.
- <sup>25</sup> Nishizawa, M.; Yadav, V. K.; Skwarczynski, M.; Takao, H.; Imagawa, H.; Sugihara, T. Mercuric Triflate Catalyzed Hydroxylative Carbocyclization of 1,6-Enynes. *Org. Lett.* **2003**, *5*, 1609 -1611.
- <sup>26</sup> Shi, H.; Yu, S.; Liu, D.; van Ofwegen, L.; Proksch, P.; Lin, W. Sinularones A-I, New Cyclopentenone and Butenolide Derivatives from a Marine Soft Coral *Sinularia* sp. and Their Antifouling Activity. *Marine Drugs* **2012**, *10*, 1331-1344.
- <sup>27</sup> Takanashi, K.; Lee, V. Y.; Sekiguchi, A. Tetrasilacyclobutadiene and Cyclobutadiene Tricarbonylruthenium Complexes:  $[\eta^4\text{-}(t\text{Bu}_2\text{MeSi})_4\text{Si}_4]\text{Ru}(\text{CO})_3$  and  $[\eta^4\text{-}(\text{Me}_3\text{Si})_4\text{C}_4]\text{Ru}(\text{CO})_3$ . *Organometallics* **2009**, *28*, 1248-1251.
- <sup>28</sup> Maier, G.; Neudert, J.; Pappusch, D.; Sekiguchi, A.; Tanaka, M.; Matsuo, T. Tetrakis(trimethylsilyl)tetrahydrane. *J. Am. Chem. Soc.* **2002**, *124*, 13819-13826.
- <sup>29</sup> Rosca, D.-A.; Radkowski, K.; Wolf, L. M.; Wagh, M.; Goddard, R.; Thiel, W.; Fürstner, A. Ruthenium-Catalyzed Alkyne *trans*-Hydrometalation: Mechanistic Insights and Preparative Implications. *J. Am. Chem. Soc.* **2017**, *139*, 2443-2455.
- <sup>30</sup> Day, A. C.; Whiting, M. C. Acetone Hydrazone. *Org. Synth.* **1970**, *50*, 3.
- <sup>31</sup> Andrews, S. D.; Day, A. C.; Raymond, P.; Whiting, M. C. 2-Diazopropane. *Org. Synth.* **1970**, *50*, 27.
- <sup>32</sup> Gagné, M. R.; Grubbs, R. H.; Feldman, J.; Ziller, J. W. Catalytic Activity of a Well-Defined Binuclear Ruthenium Alkylidene Complex. *Organometallics* **1992**, *11*, 3933-3935.
- <sup>33</sup> Suresh, C. H. Nature of  $\alpha,\beta$ -CCC Agostic Bonding in Metallacyclobutanes. *J. Organomet. Chem.* **2006**, *691*, 5366-5374.
- <sup>34</sup> Suresh, C. H.; Koga, N. Orbital Interactions in the Ruthenium Olefin Metathesis Catalysts. *Organometallics* **2004**, *23*, 76-80.
- <sup>35</sup> Neese, F. The ORCA Program System. *Wires Comput. Mol. Sci.* **2012**, *2*, 73–78.
- <sup>36</sup> Stephens, P. J.; Devlin, F. J.; Chabalowski, C. F.; Frisch, M. J. *Ab Initio* Calculation of Vibrational Absorption and Circular Dichroism Spectra Using Density Functional Force Fields. *J. Phys. Chem.* **1994**, *98*, 11623-11627.
- <sup>37</sup> Grimme, S.; Ehrlich, S.; Goerigk, L. Effect of the Damping Function in Dispersion Corrected Density Functional Theory. *J. Comp. Chem.* **2011**, *32*, 1456–1465.

- 
- <sup>38</sup> Weigend, F.; Ahlrichs, R. Balanced Basis Sets of Split Valence, Triple Zeta Valence and Quadruple Zeta Valence Quality for H to Rn: Design and Assessment of Accuracy. *Phys. Chem. Chem. Phys.* **2005**, *7*, 3297–3305.
- <sup>39</sup> Yepes, D.; Neese, F.; List, B.; Bistoni, G. Unveiling the Delicate Balance of Steric and Dispersion Interactions in Organocatalysis Using High-Level Computational Methods. *J. Am. Chem. Soc.* **2020**, *142*, 3613-3625.
- <sup>40</sup> Riplinger, C.; Pinski, P.; Becker, U.; Valeev, E. F.; Neese, F. Sparse Maps – A Systematic Infrastructure for Reduced-scaling Electronic Structure Methods. II. Linear Scaling Domain Based Pair Natural Orbital Coupled Cluster Theory. *J. Chem. Phys.* **2016**, *144*, 024109.
- <sup>41</sup> Barone, V.; Cossi, M. Quantum Calculation of Molecular Energies and Energy Gradients in Solution by a Conductor Solvent Model. *J. Phys. Chem. A* **1998**, *102*, 1995-2001.
- <sup>42</sup> Henkelman, G.; Jonsson, H. Improved Tangent Estimate in the Nudged Elastic Band Method for Finding Minimum Energy Paths and Saddle Points. *J. Chem. Phys.* **2000**, *113*, 9978-9985.
